# Supplementary material for: Wheat individual grain-size variance originates from crop development and from specific genetic determinism
Source: PubMed Central journal article supplement (PMC7098578; doi:10.1371/journal.pone.0230689), 2020-03-26
Supplement: pone.0230689.s001.pdf [file pone.0230689.s001.pdf]

| Name       | Country | YR   |
|------------|---------|------|
| Apache     | FRA     | 1998 |
| Altigo     | FRA     | 2007 |
| Bermude    | FRA     | 2007 |
| Premio     | FRA     | 2007 |
| Einstein   | GBR     | 2002 |
| KWS Podium | GBR     | 2009 |
| Ambition   | DNK     | 2004 |
| Lear       | GBR     | 2007 |
| Alchemy    | GBR     | 2005 |
| Amundsen   | FRA     | 2007 |
| Galvano    | DNK     | 2008 |
| Istabraq   | GBR     | 2003 |
| JB Diego   | GBR     | 2006 |
| Manager    | FRA     | 2005 |
| Oxebo      | FRA     | 2009 |
| Pajero     | BEL     | 1995 |
| SY Tolbiac | FRA     | 2011 |
| Pierrot    | DNK     | 2009 |
| Samurai    | FRA     | 2004 |
| Fairplay   | FRA     | 2011 |
| Selekt     | FRA     | 2006 |
| Viscount   | GBR     | 2007 |
| Warrior    | GBR     | 2009 |
| Xi19       | GBR     | 2001 |
| Antonius   | AUT     | 2006 |
| Ronsard    | FRA     | 2011 |
| Ephoros    | DEU     | 2004 |
| Expert     | FRA     | 2007 |
| Flaubert   | FRA     | 2009 |
| Gladiator  | GBR     | 2002 |
| Glasgow    | GBR     | 2004 |
| Iridium    | FRA     | 2006 |
| Kalahari   | DEU     | 2010 |
| Kalystar   | FRA     | 2010 |
| Koreli     | FRA     | 2006 |
| Marksman   | GBR     | 2006 |
| Pepidor    | FRA     | 2006 |
| Perfector  | FRA     | 2003 |
| Pireneo    | AUT     | 2005 |
| Bergamo    | FRA     | 2011 |
| Racine     | FRA     | 2010 |
| Sankara    | FRA     | 2003 |
| Scor       | FRA     | 2008 |
| Sogood     | FRA     | 2005 |
| Sponsor    | FRA     | 1994 |
| SY Epson   | GBR     | 2011 |
| Trapez     | FRA     | 2009 |
| Allez y    | FRA     | 2010 |
| Aristote   | FRA     | 2010 |

|           |     |      |
|-----------|-----|------|
| Attitude  | FRA | 2009 |
| Atlass    | DEU | 2005 |
| Barok     | FRA | 2008 |
| Boisseau  | FRA | 2007 |
| Boregar   | FRA | 2007 |
| Camp Remy | FRA | 1980 |
| Ch Nara   | CHE | 2009 |
| Chevalier | AUT | 2006 |
| Cordiale  | GBR | 2003 |
| Crousty   | SWE | 1995 |
| Dialog    | FRA | 2007 |
| Dinosor   | FRA | 2005 |
| Folklor   | FRA | 2010 |
| Instinct  | FRA | 2005 |
| Marcelin  | FRA | 2009 |
| Papageno  | AUT | 2006 |
| Phare     | FRA | 2007 |
| Player    | FRA | 2009 |
| Renan     | FRA | 1989 |
| Sebasto   | FRA | 2007 |
| Solution  | FRA | 2007 |
| Tapidor   | FRA | 2001 |
| Toisondor | FRA | 2003 |
| Odyssee   | FRA | 2011 |
| Aldric    | FRA | 2006 |
| Alixan    | FRA | 2005 |
| Ambello   | FRA | 2010 |
| Bagou     | FRA | 2007 |
| Biancor   | FRA | 2010 |
| Caphorn   | FRA | 2000 |
| Catalan   | FRA | 2002 |
| Compil    | FRA | 2010 |
| Fluor     | FRA | 2010 |
| Galactic  | FRA | 2007 |
| Hekto     | FRA | 2009 |
| Karillon  | FRA | 2010 |
| Lord      | FRA | 2008 |
| Laurier   | FRA | 2011 |
| Orvantis  | FRA | 2000 |
| Pakito    | FRA | 2010 |
| Prevert   | FRA | 2009 |
| Blini     | MAR | 2012 |
| Rustic    | BEL | 2005 |
| Sokal     | FRA | 2011 |
| Sorrial   | FRA | 2008 |
| Sweet     | FRA | 2010 |
| Swinggy   | FRA | 2008 |
| SY Mattis | FRA | 2010 |
| Figaro    | FRA | 2011 |
| Aligator  | FRA | 2009 |

|            |     |      |
|------------|-----|------|
| Altamira   | FRA | 2009 |
| Amador     | FRA | 2009 |
| Aprilio    | FRA | 2010 |
| Aramis     | FRA | 2009 |
| Arezzo     | FRA | 2007 |
| Arkeos     | FRA | 2010 |
| Arlequin   | FRA | 2007 |
| Athlon     | FRA | 2009 |
| Aubusson   | FRA | 2001 |
| Bastide    | FRA | 2002 |
| Buenno     | FRA | 2007 |
| SY Moisson | FRA | 2011 |
| Celestin   | FRA | 2009 |
| Epidoc     | FRA | 2005 |
| Euclide    | FRA | 2006 |
| Farinelli  | FRA | 2010 |
| Oregrain   | FRA | 2011 |
| Cellule    | FRA | 2011 |
| Flamenko   | FRA | 2010 |
| Galpino    | ESP | 2010 |
| Goncourt   | FRA | 2008 |
| Graindor   | FRA | 2005 |
| Hiseo      | ITA | 2010 |
| Illico     | FRA | 2009 |
| Innov      | FRA | 2005 |
| Isengrain  | FRA | 1997 |
| MH 09-17   | FRA | NA   |
| Musik      | FRA | 2010 |
| Ascott     | FRA | 2011 |
| Paledor    | FRA | 2004 |
| Rubisko    | FRA | 2011 |
| Saint Ex   | FRA | 2010 |
| Scenario   | FRA | 2010 |
| Soissons   | FRA | 1987 |
| Solehio    | FRA | 2008 |
| SY Alteo   | FRA | 2010 |
| Tremie     | FRA | 1992 |
| Tulip      | FRA | 2010 |
| Uski       | FRA | 2008 |
| Accor      | FRA | 2006 |
| Accroc     | FRA | 2009 |
| Acienda    | FRA | 2004 |
| Adhoc      | FRA | 2010 |
| Altria     | FRA | 1996 |
| Andalou    | FRA | 2001 |
| Autan      | FRA | 2000 |
| Azimut     | FRA | 2004 |
| Bologna    | ESP | 2001 |
| Cezanne    | FRA | 1998 |
| Courtot    | FRA | 1974 |

|             |     |      |
|-------------|-----|------|
| Eureka      | FRA | 1992 |
| Exotic      | FRA | 2005 |
| Galopain    | FRA | 2009 |
| Garcia      | FRA | 2005 |
| Jaguar      | ITA | 2009 |
| Miroir      | FRA | 2010 |
| Artdeco     | FRA | 2011 |
| PR22R58     | ITA | 2002 |
| Primo       | ITA | 2009 |
| Quality     | ITA | 2002 |
| Rimbaud     | FRA | 2009 |
| Royssac     | FRA | 2002 |
| Sirtaki     | ITA | 2007 |
| Soledad     | ITA | 2008 |
| Sollario    | FRA | 2007 |
| Basmati     | ITA | 2011 |
| Tigre       | POR | 1996 |
| Calisol     | FRA | 2012 |
| Isidor      | FRA | 2002 |
| Ardelor     | FRA | 2010 |
| Deucendeu   | FRA | 1997 |
| Eperon      | FRA | 2012 |
| Behert      | FRA | 1995 |
| Blason      | FRA | 1977 |
| Genesis     | FRA | 1992 |
| Grenier     | FRA | 1992 |
| Amifort     | FRA | 1992 |
| Sofolk CS   | FRA | 2014 |
| Aigle       | FRA | 2014 |
| Aplomb      | FRA | 2014 |
| Armada      | FRA | 1978 |
| Bonifacio   | FRA | 2011 |
| Calabro     | FRA | 2011 |
| Calumet     | FRA | 2013 |
| Sothys CS   | FRA | 2014 |
| RGT Mondio  | FRA | 2014 |
| Picador     | FRA | 2006 |
| Audace      | FRA | 1996 |
| Sherlock    | FRA | 2014 |
| Auckland    | FRA | 2014 |
| Element     | AUT | 2006 |
| Foxyl       | FRA | 2014 |
| Lavoisier   | FRA | 2013 |
| Lennox      | FRA | 2012 |
| Nemo        | FRA | 2014 |
| Plainedor   | FRA | 2009 |
| Quatuor     | FRA | 2002 |
| RGT Venezia | FRA | 2013 |
| Diamento    | FRA | 2012 |
| Syllon      | FRA | 2013 |

|            |     |      |
|------------|-----|------|
| Descartes  | FRA | 2013 |
| Collector  | FRA | 2014 |
| Belepi     | FRA | 2012 |
| Chevron    | FRA | 2009 |
| Contrefor  | FRA | 2010 |
| Fructidor  | FRA | 2013 |
| Ghayta     | FRA | 2012 |
| Granamax   | FRA | 2013 |
| Hendrix    | FRA | 2011 |
| Kundera    | FRA | 2013 |
| Lyrik      | FRA | 2011 |
| Minotor    | FRA | 2007 |
| RGT Tekno  | FRA | 2014 |
| Skerzzo    | FRA | 2011 |
| Triumph    | FRA | 2014 |
| Orfield    | FRA | 1998 |
| Gallixe    | FRA | 2014 |
| Gotik      | FRA | 2014 |
| Grapeli    | FRA | 2012 |
| Noblesko   | FRA | 2011 |
| Phileas    | FRA | 2014 |
| Quebon     | FRA | 2004 |
| RGT Texaco | FRA | 2014 |
| Terroir    | FRA | 2012 |
| Baltimor   | FRA | 1998 |
| Mandragor  | FRA | 2012 |
| Popeye     | FRA | 2014 |
| Costello   | FRA | 2014 |
| Paindor    | FRA | 1996 |
