# Supplementary material for: Wheat individual grain-size variance originates from crop development and from specific genetic determinism
Source: PubMed Central journal article supplement (PMC7098578; doi:10.1371/journal.pone.0230689), 2020-03-26
Supplement: pone.0230689.s002.pdf [file pone.0230689.s002.pdf]

| Name        | Country | YR   |
|-------------|---------|------|
| A_15        | AFG     | NA   |
| KLEIN_32    | ARG     | 1932 |
| KL_ESTRELLA | ARG     | 1995 |
| SWM89Y074   | ARM     | NA   |
| ATUT_II     | AUT     | 1974 |
| DANUBIUS    | AUT     | 1974 |
| KRISTALL    | AUT     | 1983 |
| NEUHOF_1    | AUT     | 1969 |
| OENUS       | AUT     | 1977 |
| P4523_80    | AUT     | NA   |
| PROBSTDORF  | AUT     | 1982 |
| PROBSTDORF  | AUT     | 1967 |
| PROBSTDORF  | AUT     | 1969 |
| PROTEKTOR   | AUT     | 1974 |
| RINNER_WIN  | AUT     | 1972 |
| VERBESSERTE | AUT     | 1962 |
| REICHERSBER | AUT     | 1955 |
| FERDINAND   | AUT     | 1982 |
| CAPO        | AUT     | 1990 |
| PROBSTDORF  | AUT     | 1963 |
| ALBATROS    | BEL     | 1950 |
| ALTER_DE_G  | BEL     | NA   |
| PRECOCE_DE  | BEL     | 1930 |
| RENVAL      | BEL     | 1977 |
| CAPITAINE   | BEL     | 1982 |
| 2109_36     | BGR     | 1976 |
| 2678_6      | BGR     | NA   |
| 2838_39     | BGR     | NA   |
| KREMENA     | BGR     | 1978 |
| K14         | BGR     | NA   |
| KRAPETZ     | BGR     | 1982 |
| SADOVO_SU   | BGR     | 1979 |
| SADOVO_1    | BGR     | 1972 |
| TRAYANA     | BGR     | 1981 |
| 830_22      | BGR     | NA   |
| HARUS       | CAN     | 1985 |
| CDC_CLAIR   | CAN     | 1997 |
| ARINA       | CHE     | 1981 |
| BERNINA     | CHE     | 1983 |
| CH73185     | CHE     | 1980 |
| CH73241     | CHE     | 1979 |
| CH73425     | CHE     | 1979 |
| CH73641     | CHE     | 1982 |
| FERMO       | CHE     | 1978 |
| TAMBO       | CHE     | 1985 |
| CAMINO      | CHE     | 1993 |
| IWWRN_85_   | CHL     | NA   |
| CAR1608     | CHL     | NA   |
| QUENOA_INI  | CHL     | NA   |

|            |     |      |
|------------|-----|------|
| DANUBIA    | CZE | 1984 |
| OSKA       | CZE | 1971 |
| BRANKA     | CZE | 1988 |
| SOLARIS    | CZE | 1976 |
| BLAVA      | CZE | 1992 |
| ALKA       | CZE | 1995 |
| BRUTA      | CZE | 1994 |
| MONA       | CZE | 1994 |
| SIRIA      | CZE | 1994 |
| SIDA       | CZE | 1993 |
| SIMONA     | CZE | 1991 |
| SOFIA      | CZE | 1985 |
| VLADA      | CZE | 1990 |
| REGINA     | CZE | 1981 |
| ALMUS      | DEU | 1973 |
| CAROLUS    | DEU | 1985 |
| DISPONENT  | DEU | 1980 |
| GRANADA    | DEU | 1980 |
| HOCHLAND   | DEU | 1955 |
| HOLZAPFELS | DEU | 1917 |
| TENOR      | DEU | 1960 |
| TRUBILO    | DEU | 1948 |
| TRANE      | DEU | 1994 |
| PETRUS     | DEU | 1996 |
| BOVICTUS   | DEU | 1993 |
| RONOS      | DEU | 1988 |
| BONTARIS   | DEU | 1990 |
| MILLER     | DNK | 2001 |
| MANERO     | ESP | NA   |
| SAN_RAFAEL | ESP | 1964 |
| SANSA      | ESP | 1988 |
| VAKKA      | FIN | 1953 |
| DI37_12_2  | FRA | NA   |
| DI50_12    | FRA | NA   |
| ABEL       | FRA | 1961 |
| ABO        | FRA | 1977 |
| ALCY_CAMBI | FRA | 1956 |
| ALTERNA_TO | FRA | 1957 |
| ALTO       | FRA | 1975 |
| AUBE       | FRA | 1960 |
| BALI       | FRA | 1975 |
| BIZEL      | FRA | 1966 |
| BRACO      | FRA | 1977 |
| CAPET      | FRA | 1989 |
| CEREALOR   | FRA | 1964 |
| CHAMBORD   | FRA | 1960 |
| CORSODOR   | FRA | 1987 |
| COTE_D_OR  | FRA | 1937 |
| COURTAL    | FRA | 1943 |
| DECLIC     | FRA | 1985 |

|             |     |      |
|-------------|-----|------|
| DI7003_1_12 | FRA | NA   |
| DI7202_103  | FRA | NA   |
| DI7210_15_1 | FRA | NA   |
| ECRIN       | FRA | 1985 |
| ESPOIR      | FRA | 1950 |
| FANION      | FRA | 1978 |
| FOISON      | FRA | 1985 |
| FROIDURE    | FRA | 1960 |
| GELPA       | FRA | 1967 |
| GERMINAL    | FRA | 1969 |
| GH126       | FRA | NA   |
| HEURTEBISE  | FRA | 1954 |
| HUGO        | FRA | 1988 |
| LANGUEDOC   | FRA | 1962 |
| MONTJOIE    | FRA | 1969 |
| NECTAR      | FRA | 1985 |
| PRESTIGE    | FRA | 1969 |
| PRIMEPI     | FRA | 1962 |
| PROQUAL     | FRA | 1959 |
| RALLYE      | FRA | 1963 |
| RIGOUDI     | FRA | 1966 |
| TARASQUE    | FRA | 1981 |
| TORRIL      | FRA | 1989 |
| ULM         | FRA | 1983 |
| MAXIMUM_C   | FRA | 1936 |
| AJAX        | FRA | 1994 |
| BOURGOGNE   | FRA | 1995 |
| NOBLET      | FRA | 1995 |
| ORMIL       | FRA | 1996 |
| VIENNOY     | FRA | 1994 |
| BEHERT      | FRA | 1994 |
| TALDOR      | FRA | 1997 |
| ASVM4_BEAL  | FRA | 1994 |
| COMTAL      | FRA | 1973 |
| CORIN       | GBR | 1976 |
| CWW1857_1   | GBR | 1980 |
| FLORIO      | GBR | 1993 |
| HOLDFAST    | GBR | 1936 |
| PAGEANT     | GBR | 1981 |
| STETSON     | GBR | 1981 |
| MADRIGAL    | GBR | 1995 |
| MALACCA     | GBR | 1997 |
| SIROKA      | HRV | 1984 |
| ZG_IPK_4387 | HRV | NA   |
| ZG1004_82   | HRV | 1982 |
| ZG7865_83   | HRV | 1983 |
| CERERA      | HRV | 1993 |
| ZITARKA_1   | HRV | 1985 |
| ZG3073_84   | HRV | 1984 |
| ARPADHALON  | HUN | NA   |

|             |     |      |
|-------------|-----|------|
| HERKULES    | HUN | NA   |
| GK_CSUROS   | HUN | 1991 |
| GK_KALAKA   | HUN | NA   |
| HATVANI_40  | HUN | NA   |
| KARCAGI_149 | HUN | 1967 |
| MV03_86     | HUN | 1986 |
| MV06_80     | HUN | 1980 |
| MV17_86     | HUN | 1986 |
| MV23_77     | HUN | 1978 |
| MV30_86     | HUN | 1986 |
| MV33_86     | HUN | 1986 |
| MV119_88    | HUN | 1988 |
| GK_SAGVARI  | HUN | NA   |
| MV_MAGVAS   | HUN | 1998 |
| MV_MARTIN   | HUN | 1998 |
| GK_ZUGOLY   | HUN | 1994 |
| MV233_99    | HUN | 1999 |
| MV309_99    | HUN | 1999 |
| MV314_99    | HUN | 1999 |
| MV_EMMA     | HUN | 1994 |
| MV_VEKNI    | HUN | NA   |
| OWL_Col_Nod | IRN | NA   |
| AUTONOMIA   | ITA | 1938 |
| COLORBEN_4  | ITA | 1966 |
| F51         | ITA | 1961 |
| IDRA        | ITA | 1994 |
| JACOMETTI_4 | ITA | 1966 |
| OVEST       | ITA | 1961 |
| ROMA        | ITA | 1935 |
| SALTO       | ITA | 1939 |
| SAN_MAURCO  | ITA | 1990 |
| SALMONE     | ITA | 1980 |
| LORETO      | ITA | 1982 |
| DEMAR_4     | ITA | 1965 |
| HOKUEI      | JPN | 1965 |
| HOROSHIRI_H | JPN | 1974 |
| MUTSUBENK   | JPN | 1950 |
| TAISETSU_KC | JPN | 1990 |
| BONNY       | KEN | 1966 |
| BERMET      | KGZ | 1998 |
| ERYTHROSPE  | KGZ | 1979 |
| TILEK       | KGZ | 2001 |
| ALMA        | LTU | NA   |
| OBRII_DNEST | MDA | NA   |
| SKOPJANKA   | MKD | 1982 |
| APOLLO      | NLD | 1958 |
| BEAUBOURG   | NLD | 1993 |
| SEMPER      | NLD | 1998 |
| RIDA        | NOR | 1977 |
| PEGASUS     | NZL | 1985 |

|             |     |      |
|-------------|-----|------|
| KOTARE      | NZL | 1984 |
| DANKOWSKA   | POL | 1920 |
| JANA        | POL | 1975 |
| LUNA        | POL | 1970 |
| ZETA        | POL | 1978 |
| DACIA       | ROU | 1971 |
| FAVORIT     | ROU | 1970 |
| LOVRIN_29   | ROU | 1975 |
| MOLDOVA     | ROU | 1970 |
| TURDA_95    | ROU | 1995 |
| ANIVERSAR   | ROU | 1986 |
| MAGISTRAL   | ROU | 1998 |
| DRUZHBA     | RUS | 1981 |
| ERSHOVSKAJ  | RUS | 1973 |
| KRASNODAR   | RUS | 1973 |
| BELGORODSK  | RUS | 1997 |
| PAMYATI_FE  | RUS | 1993 |
| ERMAK       | RUS | 2001 |
| PALPICH     | RUS | 2004 |
| SELYANKA    | RUS | 2002 |
| MALYSA      | SVK | 1998 |
| RUBIS       | SWE | 1962 |
| TIMMO       | SWE | 1982 |
| ES14_SITTA_ | TCA | NA   |
| 308_02_2_W  | TCA | NA   |
| BILINMIYEN9 | TCA | NA   |
| TCI962395   | TCA | NA   |
| AKULA_BONI  | TCA | NA   |
| BONITO__KA  | TCA | NA   |
| GONCHA      | TKM | NA   |
| GARAGUM     | TKM | 2000 |
| WWL860104   | TUR | NA   |
| CIT89073    | TUR | NA   |
| GEREK79     | TUR | 1979 |
| TCI960735   | TUR | NA   |
| LUTESCENS_C | UKR | 1984 |
| LUTESCENS_C | UKR | 1985 |
| LUTESCENS_B | UKR | 1984 |
| MIRONOVSKA  | UKR | 1960 |
| OBRII       | UKR | 1983 |
| VESELOPODC  | UKR | 1938 |
| DONCHANKA   | UKR | 1995 |
| LUTESCENS_7 | UKR | 1991 |
| DONETSKAYA  | UKR | 1990 |
| MIRONOVSKA  | UKR | 1995 |
| MIRONOVSKA  | UKR | 1992 |
| MIRLEBEN    | UKR | 1993 |
| FEDOROVKA   | UKR | 1993 |
| ODESKA_161  | UKR | 1995 |
| ODESKA_267  | UKR | 1997 |

|            |     |      |
|------------|-----|------|
| MIRONIVSKA | UKR | 1999 |
| KHVYLIA    | UKR | 1995 |
| ARGEE      | USA | 1976 |
| BENNI      | USA | 1980 |
| BOLAL      | USA | 1970 |
| BUCKSKIN   | USA | 1973 |
| CARSON     | USA | 1986 |
| CHARCOAL_B | USA | 1977 |
| CHARMANY   | USA | 1984 |
| COLT       | USA | 1983 |
| COMPACT    | USA | 1974 |
| DOWNY      | USA | 1976 |
| HIPLAINS   | USA | 1973 |
| MCNAIR_158 | USA | 1973 |
| MCNAIR_701 | USA | 1973 |
| MONON      | USA | 1959 |
| NUGAINES   | USA | 1965 |
| OMAR       | USA | 1955 |
| PAYNE      | USA | 1977 |
| REDLAND    | USA | 1986 |
| ROSE       | USA | 1981 |
| SALUDA     | USA | 1983 |
| SCOUT_66   | USA | 1967 |
| SENTINEL   | USA | 1973 |
| STACY      | USA | 1980 |
| STADLER    | USA | 1964 |
| STODDARD   | USA | 1973 |
| TAM_108    | USA | 1984 |
| TECUMSEH   | USA | 1974 |
| UTE        | USA | 1983 |
| WHEELER    | USA | 1980 |
| YORKSTAR   | USA | 1968 |
| NORWIN     | USA | 1984 |
| ARTHUR     | USA | 1968 |
| ROD        | USA | 1992 |
| MACNAIR181 | USA | 1981 |
| LONGHORN   | USA | 1991 |
| PRONGHORN  | USA | 1996 |
| MCGUIRE    | USA | 1996 |
| RAMPART    | USA | 1996 |
| GR915      | USA | 1991 |
| P29        | USA | 1996 |
| PROWERS_99 | USA | 1999 |
| TAMEX      | USA | 1980 |
| COUGAR     | USA | 1999 |
| PAT        | USA | 2001 |
| EDWIN      | USA | 1999 |
| ADENA      | USA | 1984 |
| HOSAR      | USA | 1930 |
| SUSQUEHAN  | USA | 1988 |

|            |     |      |
|------------|-----|------|
| MUSTANG    | USA | 1983 |
| ALBIDUM    | UZB | 1974 |
| AGROUNIA   | YUG | 1987 |
| NS_RANA_1  | YUG | 1975 |
| SUTJESKA   | YUG | 1979 |
| ZITNICA    | YUG | 1982 |
| UNA        | YUG | 1983 |
| CRVENA_ZVE | YUG | 1967 |
