# Supplementary material for: Wheat individual grain-size variance originates from crop development and from specific genetic determinism
Source: PubMed Central journal article supplement (PMC7098578; doi:10.1371/journal.pone.0230689), 2020-03-26
Supplement: pone.0230689.s004.pdf [file pone.0230689.s004.pdf]

| Zone | Chr | Trait | Env | Nb.SNP <sup>(1)</sup> | LOD.score.max <sup>(2)</sup> | Position <sup>(3)</sup> |          | MAF <sup>(4)</sup> |      | Effect <sup>(5)</sup> |        |
|------|-----|-------|-----|-----------------------|------------------------------|-------------------------|----------|--------------------|------|-----------------------|--------|
|      |     |       |     |                       |                              | Min                     | Max      | Mean               | SD   | Mean                  | SD     |
| 1    | 1A  | GSV   | E1  | 70                    | 4.05                         | 0.00E+00                | 5.53E+08 | 0.20               | 0.09 | -0.47                 | 0.11   |
| 1    | 1A  | SPM2  | E1  | 17                    | 4.54                         | 0.00E+00                | 5.53E+08 | 0.27               | 0.08 | -5.40                 | 20.30  |
| 1    | 1A  | GPS   | E1  | 3                     | 3.14                         | 0.00E+00                | 5.53E+08 | 0.10               | 0.00 | -1.89                 | 0.00   |
| 1    | 1A  | GPM2  | E1  | 23                    | 3.82                         | 0.00E+00                | 5.53E+08 | 0.27               | 0.03 | -684.46               | 37.92  |
| 1    | 1A  | TKW   | E1  | 10                    | 3.69                         | 0.00E+00                | 5.53E+08 | 0.26               | 0.00 | 0.98                  | 0.04   |
| 2    | 2A  | GSV   | E1  | 13                    | 3.35                         | 8.02E+07                | 9.00E+07 | 0.10               | 0.01 | -0.58                 | 0.02   |
| 2    | 2A  | GPM2  | E1  | 50                    | 4.12                         | 8.02E+07                | 9.00E+07 | 0.19               | 0.06 | -824.81               | 245.82 |
| 3    | 2A  | GSV   | E1  | 18                    | 3.89                         | 7.33E+08                | 7.35E+08 | 0.19               | 0.06 | 0.47                  | 0.08   |
| 4    | 2B  | GSV   | E1  | 7                     | 3.53                         | 2.29E+07                | 7.88E+08 | 0.26               | 0.15 | -0.08                 | 0.46   |
| 4    | 2B  | SPM2  | E1  | 12                    | 4.47                         | 2.29E+07                | 7.88E+08 | 0.20               | 0.05 | 20.55                 | 13.99  |
| 4    | 2B  | GPS   | E1  | 32                    | 4.04                         | 2.29E+07                | 7.88E+08 | 0.39               | 0.02 | 1.14                  | 0.43   |
| 4    | 2B  | GPM2  | E1  | 3                     | 3.09                         | 2.29E+07                | 7.88E+08 | 0.09               | 0.03 | -1017.11              | 138.37 |
| 4    | 2B  | TKW   | E1  | 82                    | 4.28                         | 2.29E+07                | 7.88E+08 | 0.31               | 0.08 | 0.67                  | 0.76   |
| 5    | 2B  | GSV   | E1  | 14                    | 4.24                         | 7.76E+08                | 7.78E+08 | 0.25               | 0.05 | 0.42                  | 0.03   |
| 5    | 2B  | GPM2  | E1  | 1                     | 3.31                         | 7.76E+08                | 7.78E+08 | 0.49               | NA   | -606.90               | NA     |
| 6    | 3A  | GSV   | E1  | 95                    | 4.08                         | 3.59E+07                | 3.88E+07 | 0.48               | 0.01 | 0.36                  | 0.07   |
| 7    | 3B  | GSV   | E1  | 55                    | 3.40                         | 5.77E+08                | 8.09E+08 | 0.17               | 0.06 | -0.47                 | 0.08   |
| 7    | 3B  | SPM2  | E1  | 211                   | 5.59                         | 5.77E+08                | 8.09E+08 | 0.41               | 0.03 | -19.91                | 1.15   |
| 7    | 3B  | GPM2  | E1  | 88                    | 4.54                         | 5.77E+08                | 8.09E+08 | 0.30               | 0.06 | -676.04               | 48.58  |
| 7    | 3B  | GPS   | E1  | 1                     | 3.37                         | 5.77E+08                | 8.09E+08 | 0.12               | NA   | 1.79                  | NA     |
| 7    | 3B  | TKW   | E1  | 28                    | 5.48                         | 5.77E+08                | 8.09E+08 | 0.33               | 0.07 | -0.97                 | 0.17   |
| 8    | 4A  | GSV   | E1  | 237                   | 4.53                         | 6.27E+08                | 6.88E+08 | 0.10               | 0.02 | 0.63                  | 0.07   |
| 9    | 5A  | GSV   | E1  | 8                     | 3.28                         | 6.53E+08                | 6.58E+08 | 0.18               | 0.03 | -0.45                 | 0.03   |
| 9    | 5A  | TKW   | E1  | 1                     | 3.26                         | 6.53E+08                | 6.58E+08 | 0.07               | NA   | -1.66                 | NA     |
| 10   | 5D  | GSV   | E1  | 161                   | 4.28                         | 4.04E+07                | 3.48E+08 | 0.43               | 0.10 | 0.10                  | 0.35   |
| 10   | 5D  | GPS   | E1  | 26                    | 3.51                         | 4.04E+07                | 3.48E+08 | 0.45               | 0.09 | -0.58                 | 1.03   |
| 11   | 6A  | GSV   | E1  | 86                    | 4.36                         | 6.14E+08                | 6.17E+08 | 0.45               | 0.02 | 0.34                  | 0.11   |
| 12   | 6B  | GSV   | E1  | 293                   | 4.61                         | 2.90E+07                | 5.42E+08 | 0.19               | 0.05 | -0.42                 | 0.14   |
| 12   | 6B  | GPM2  | E1  | 106                   | 4.54                         | 2.90E+07                | 5.42E+08 | 0.12               | 0.08 | -950.71               | 625.41 |
| 12   | 6B  | TKW   | E1  | 1                     | 3.06                         | 2.90E+07                | 5.42E+08 | 0.05               | NA   | -1.90                 | NA     |
| 13   | 7A  | GSV   | E1  | 19                    | 4.32                         | 1.44E+07                | 1.70E+07 | 0.43               | 0.02 | -0.38                 | 0.02   |
| 14   | 7A  | GSV   | E1  | 11                    | 3.95                         | 2.02E+07                | 2.39E+07 | 0.08               | 0.01 | -0.68                 | 0.06   |
| 15   | 7A  | GSV   | E1  | 76                    | 6.64                         | 6.40E+08                | 6.55E+08 | 0.16               | 0.03 | -0.65                 | 0.07   |
| 15   | 7A  | TKW   | E1  | 8                     | 3.97                         | 6.40E+08                | 6.55E+08 | 0.23               | 0.01 | -1.13                 | 0.07   |
| 16   | 7D  | GSV   | E1  | 6                     | 4.04                         | 3.98E+08                | 5.00E+08 | 0.12               | 0.04 | -0.56                 | 0.09   |
| 16   | 7D  | TKW   | E1  | 1                     | 3.45                         | 3.98E+08                | 5.00E+08 | 0.18               | NA   | -1.18                 | NA     |
| 17   | 1A  | GSV   | E2  | 70                    | 4.42                         | 2.43E+07                | 4.02E+07 | 0.21               | 0.05 | -0.35                 | 0.04   |
| 17   | 1A  | SPM2  | E2  | 1                     | 3.17                         | 2.43E+07                | 4.02E+07 | 0.47               | NA   | 11.93                 | NA     |
| 18   | 1A  | GSV   | E2  | 15                    | 4.14                         | 5.83E+08                | 5.86E+08 | 0.12               | 0.02 | -0.46                 | 0.04   |
| 19   | 2B  | GSV   | E2  | 19                    | 3.93                         | 2.49E+07                | 2.67E+07 | 0.19               | 0.01 | -0.37                 | 0.01   |
| 20   | 2B  | GSV   | E2  | 3                     | 4.55                         | 7.96E+08                | 7.97E+08 | 0.11               | 0.00 | -0.49                 | 0.04   |
| 21   | 2B  | GSV   | E2  | 4                     | 4.72                         | 7.94E+08                | 7.96E+08 | 0.21               | 0.05 | -0.41                 | 0.05   |
| 22   | 3A  | GSV   | E2  | 27                    | 3.41                         | 3.59E+07                | 3.87E+07 | 0.49               | 0.00 | 0.28                  | 0.00   |
| 23   | 3A  | GSV   | E2  | 7                     | 3.70                         | 4.41E+08                | 5.66E+08 | 0.13               | 0.01 | -0.42                 | 0.02   |
| 23   | 3A  | TKW   | E2  | 64                    | 4.04                         | 4.41E+08                | 5.66E+08 | 0.18               | 0.04 | -1.21                 | 0.32   |
| 23   | 3A  | GPM2  | E2  | 9                     | 4.07                         | 4.41E+08                | 5.66E+08 | 0.08               | 0.03 | -1034.82              | 268.01 |
| 24   | 3A  | GSV   | E2  | 48                    | 3.36                         | 7.09E+08                | 7.11E+08 | 0.33               | 0.04 | 0.30                  | 0.02   |
| 24   | 3A  | SPM2  | E2  | 41                    | 3.42                         | 7.09E+08                | 7.11E+08 | 0.22               | 0.00 | -14.03                | 0.27   |

|    |    |      |    |      |      |          |          |      |      |          |        |
|----|----|------|----|------|------|----------|----------|------|------|----------|--------|
| 25 | 3A | GSV  | E2 | 8    | 3.85 | 6.86E+08 | 6.89E+08 | 0.46 | 0.03 | -0.21    | 0.22   |
| 26 | 3D | GSV  | E2 | 8    | 3.90 | 3.96E+08 | 4.15E+08 | 0.38 | 0.03 | 0.30     | 0.02   |
| 27 | 3D | GSV  | E2 | 20   | 3.58 | 5.93E+08 | 6.00E+08 | 0.20 | 0.01 | -0.35    | 0.01   |
| 28 | 4A | GSV  | E2 | 8    | 3.56 | 6.15E+08 | 6.17E+08 | 0.30 | 0.05 | -0.32    | 0.01   |
| 29 | 5B | GSV  | E2 | 9    | 3.47 | 5.59E+08 | 5.64E+08 | 0.31 | 0.01 | 0.31     | 0.01   |
| 30 | 5B | GSV  | E2 | 7    | 3.98 | 5.81E+08 | 5.84E+08 | 0.36 | 0.01 | -0.30    | 0.02   |
| 31 | 6A | GSV  | E2 | 40   | 4.13 | 8.99E+06 | 1.56E+07 | 0.12 | 0.01 | -0.48    | 0.02   |
| 31 | 6A | GPM2 | E2 | 7    | 3.47 | 8.99E+06 | 1.56E+07 | 0.05 | 0.01 | -1173.09 | 88.37  |
| 32 | 6B | GSV  | E2 | 12   | 4.60 | 2.99E+07 | 3.36E+07 | 0.13 | 0.05 | -0.47    | 0.07   |
| 32 | 6B | TKW  | E2 | 2    | 3.67 | 2.99E+07 | 3.36E+07 | 0.23 | 0.23 | -0.40    | 2.13   |
| 33 | 7A | GSV  | E2 | 55   | 3.41 | 7.55E+05 | 2.81E+07 | 0.48 | 0.01 | 0.24     | 0.14   |
| 33 | 7A | TKW  | E2 | 7    | 3.53 | 7.55E+05 | 2.81E+07 | 0.36 | 0.10 | -1.02    | 0.13   |
| 34 | 7A | GSV  | E2 | 75   | 5.87 | 6.38E+08 | 6.60E+08 | 0.15 | 0.04 | -0.45    | 0.06   |
| 34 | 7A | SPM2 | E2 | 8    | 3.73 | 6.38E+08 | 6.60E+08 | 0.14 | 0.02 | 17.33    | 0.25   |
| 34 | 7A | TKW  | E2 | 16   | 4.20 | 6.38E+08 | 6.60E+08 | 0.21 | 0.02 | -1.25    | 0.07   |
| 35 | 7A | GSV  | E2 | 16   | 3.44 | 6.80E+08 | 6.85E+08 | 0.44 | 0.08 | -0.25    | 0.17   |
| 36 | 7B | GSV  | E2 | 19   | 4.39 | 0.00E+00 | 6.94E+08 | 0.40 | 0.00 | 0.34     | 0.01   |
| 36 | 7B | SPM2 | E2 | 3    | 4.05 | 0.00E+00 | 6.94E+08 | 0.14 | 0.10 | 20.47    | 5.00   |
| 36 | 7B | TKW  | E2 | 1    | 3.04 | 0.00E+00 | 6.94E+08 | 0.29 | NA   | 1.05     | NA     |
| 36 | 7B | GPM2 | E2 | 6    | 5.17 | 0.00E+00 | 6.94E+08 | 0.15 | 0.12 | -861.07  | 330.04 |
| 37 | 1B | GSV  | E3 | 65   | 3.93 | 0.00E+00 | 2.68E+08 | 0.20 | 0.04 | 0.57     | 0.05   |
| 37 | 1B | GPS  | E3 | 1    | 3.07 | 0.00E+00 | 2.68E+08 | 0.21 | NA   | -2.37    | NA     |
| 37 | 1B | SPM2 | E3 | 88   | 4.15 | 0.00E+00 | 2.68E+08 | 0.28 | 0.04 | -23.87   | 5.11   |
| 37 | 1B | TKW  | E3 | 3    | 3.75 | 0.00E+00 | 2.68E+08 | 0.19 | 0.06 | 1.26     | 0.23   |
| 38 | 1B | GSV  | E3 | 7    | 4.65 | 5.25E+08 | 5.33E+08 | 0.37 | 0.03 | -0.46    | 0.03   |
| 39 | 2A | GSV  | E3 | 34   | 3.71 | 4.37E+07 | 4.92E+07 | 0.35 | 0.04 | -0.41    | 0.02   |
| 40 | 4A | GSV  | E3 | 5    | 3.49 | 1.92E+08 | 6.35E+08 | 0.29 | 0.00 | 0.46     | 0.01   |
| 40 | 4A | SPM2 | E3 | 1    | 3.22 | 1.92E+08 | 6.35E+08 | 0.10 | NA   | -32.27   | NA     |
| 40 | 4A | TKW  | E3 | 4    | 3.24 | 1.92E+08 | 6.35E+08 | 0.33 | 0.00 | 1.05     | 0.01   |
| 41 | 4A | GSV  | E3 | 4    | 4.04 | 5.95E+08 | 6.06E+08 | 0.36 | 0.14 | 0.19     | 0.49   |
| 41 | 4A | GPS  | E3 | 1    | 3.75 | 5.95E+08 | 6.06E+08 | 0.08 | NA   | 3.99     | NA     |
| 42 | 4B | GSV  | E3 | 5    | 4.04 | 1.39E+07 | 1.74E+07 | 0.25 | 0.04 | 0.52     | 0.03   |
| 42 | 4B | TKW  | E3 | 3    | 3.42 | 1.39E+07 | 1.74E+07 | 0.24 | 0.00 | -1.05    | 0.01   |
| 43 | 5A | GSV  | E3 | 7    | 4.11 | 6.78E+08 | 6.81E+08 | 0.43 | 0.01 | -0.42    | 0.03   |
| 44 | 5D | GSV  | E3 | 5    | 3.20 | 5.41E+08 | 5.46E+08 | 0.40 | 0.00 | -0.39    | 0.01   |
| 45 | 6A | GSV  | E3 | 120  | 4.33 | 5.62E+08 | 5.72E+08 | 0.10 | 0.00 | 0.67     | 0.03   |
| 46 | 7B | GSV  | E3 | 5    | 3.31 | 6.85E+08 | 6.92E+08 | 0.23 | 0.01 | -0.45    | 0.01   |
| 46 | 7B | GPM2 | E3 | 3    | 3.02 | 6.85E+08 | 6.92E+08 | 0.39 | 0.00 | -900.82  | 0.00   |
| 46 | 7B | TKW  | E3 | 1    | 3.04 | 6.85E+08 | 6.92E+08 | 0.40 | NA   | -0.83    | NA     |
| 47 | 7D | GSV  | E3 | 4    | 3.18 | 1.01E+08 | 1.15E+08 | 0.33 | 0.03 | 0.42     | 0.01   |
| 48 | 1A | GSV  | E4 | 5    | 3.59 | 5.16E+08 | 5.18E+08 | 0.25 | 0.01 | -0.28    | 0.02   |
| 49 | 1A | GSV  | E4 | 4    | 3.50 | 5.20E+08 | 5.22E+08 | 0.36 | 0.00 | 0.25     | 0.00   |
| 50 | 1A | GSV  | E4 | 3    | 3.26 | 5.78E+08 | 5.81E+08 | 0.09 | 0.01 | 0.39     | 0.02   |
| 51 | 1B | GSV  | E4 | 2159 | 7.08 | 0.00E+00 | 5.65E+08 | 0.20 | 0.03 | 0.42     | 0.07   |
| 51 | 1B | GPS  | E4 | 10   | 4.36 | 0.00E+00 | 5.65E+08 | 0.20 | 0.17 | 1.53     | 2.16   |
| 52 | 2A | GSV  | E4 | 5    | 3.57 | 4.89E+08 | 6.53E+08 | 0.19 | 0.09 | -0.30    | 0.04   |
| 52 | 2A | GPS  | E4 | 1    | 3.22 | 4.89E+08 | 6.53E+08 | 0.38 | NA   | -1.57    | NA     |
| 53 | 2D | GSV  | E4 | 9    | 3.19 | 6.20E+07 | 8.44E+07 | 0.51 | 0.00 | -0.22    | 0.00   |
| 54 | 2D | GSV  | E4 | 6    | 3.23 | 6.83E+07 | 9.09E+07 | 0.28 | 0.00 | -0.25    | 0.00   |
| 54 | 2D | TKW  | E4 | 7    | 4.39 | 6.83E+07 | 9.09E+07 | 0.27 | 0.00 | -1.10    | 0.02   |

|    |    |      |    |    |      |          |          |      |      |        |      |
|----|----|------|----|----|------|----------|----------|------|------|--------|------|
| 55 | 2D | GSV  | E4 | 15 | 4.24 | 1.91E+08 | 3.93E+08 | 0.20 | 0.10 | 0.25   | 0.19 |
| 56 | 5B | GSV  | E4 | 6  | 3.31 | 3.96E+07 | 1.20E+08 | 0.10 | 0.01 | -0.36  | 0.01 |
| 57 | 5B | GSV  | E4 | 10 | 3.55 | 2.63E+08 | 2.95E+08 | 0.17 | 0.01 | 0.31   | 0.01 |
| 58 | 6A | GSV  | E4 | 3  | 3.18 | 5.65E+08 | 5.71E+08 | 0.09 | 0.00 | 0.37   | 0.01 |
| 59 | 6B | GSV  | E4 | 9  | 3.61 | 4.81E+08 | 6.52E+08 | 0.34 | 0.06 | -0.25  | 0.02 |
| 59 | 6B | SPM2 | E4 | 38 | 3.79 | 4.81E+08 | 6.52E+08 | 0.25 | 0.01 | 20.03  | 0.99 |
| 60 | 6D | GSV  | E4 | 52 | 4.08 | 1.27E+08 | 2.93E+08 | 0.27 | 0.01 | 0.27   | 0.01 |
| 61 | 2D | GSV  | E4 | 1  | 4.82 | 2.91E+07 | 5.11E+07 | 0.19 | NA   | 0.39   | NA   |
| 62 | 6B | SPM2 | E2 | 1  | 3.10 | 8.06E+07 | 1.18E+08 | 0.08 | NA   | 21.27  | NA   |
| 62 | 6B | TKW  | E2 | 22 | 3.74 | 8.06E+07 | 1.18E+08 | 0.15 | 0.01 | -1.39  | 0.04 |
| 63 | 6B | GSV  | E3 | 3  | 3.15 | 6.11E+08 | 6.12E+08 | 0.28 | 0.00 | 0.42   | 0.01 |
| 63 | 6A | SPM2 | E3 | 1  | 3.08 | 6.11E+08 | 6.12E+08 | 0.11 | NA   | -30.20 | NA   |
| 64 | 7A | GSV  | E4 | 4  | 3.26 | 7.12E+08 | 7.14E+08 | 0.42 | 0.05 | -0.11  | 0.22 |
| 64 | 7A | TKW  | E4 | 1  | 3.29 | 7.12E+08 | 7.14E+08 | 0.43 | NA   | -0.84  | NA   |
