# Supplementary material for: Wheat individual grain-size variance originates from crop development and from specific genetic determinism
Source: PubMed Central journal article supplement (PMC7098578; doi:10.1371/journal.pone.0230689), 2020-03-26
Supplement: pone.0230689.s005.pdf [file pone.0230689.s005.pdf]

|               | SPM2 | GPS  | GPM2 | TKW  | GSV  | GY   |
|---------------|------|------|------|------|------|------|
| Environment 1 | 0.60 | 0.55 | 0.82 | 0.91 | 0.85 | 0.77 |
| Environment 2 | 0.61 | 0.51 | 0.76 | 0.92 | 0.82 | 0.71 |
| Environment 3 | 0.48 | 0.52 | 0.85 | 0.96 | 0.69 | 0.80 |
| Environment 4 | 0.58 | 0.80 | 0.75 | 0.91 | 0.52 | 0.74 |
