# Supplementary material for: Wheat individual grain-size variance originates from crop development and from specific genetic determinism
Source: PubMed Central journal article supplement (PMC7098578; doi:10.1371/journal.pone.0230689), 2020-03-26
Supplement: pone.0230689.s006.pdf [file pone.0230689.s006.pdf]

| Env | Trait | Chr | SNP         | Position <sup>(1)</sup> | MAF <sup>(2)</sup> | Effect <sup>(3)</sup> | LOD <sup>(4)</sup> | R <sup>2(5)</sup> |
|-----|-------|-----|-------------|-------------------------|--------------------|-----------------------|--------------------|-------------------|
| E1  | SPM2  | 1A  | AX.89382044 | 2.31E+07                | 0.50               | -16.77                | 3.20               | 0.05              |
| E1  | GY    | 1A  | AX.89365795 | 3.78E+06                | 0.08               | -4.72                 | 3.77               | 0.07              |
| E1  | GY    | 1A  | AX.89438586 | 5.55E+08                | 0.34               | -2.55                 | 3.46               | 0.06              |
| E1  | SPM2  | 1A  | AX.89592483 | 4.84E+08                | 0.34               | -17.31                | 3.11               | 0.05              |
| E1  | GY    | 1A  | AX.89654016 | 5.53E+08                | 0.45               | -2.50                 | 3.62               | 0.06              |
| E1  | SPM2  | 1A  | AX.89592294 | 4.95E+08                | 0.20               | -22.22                | 3.55               | 0.06              |
| E1  | GY    | 1A  | AX.89524501 | 5.04E+08                | 0.26               | -2.61                 | 3.15               | 0.05              |
| E1  | SPM2  | 1A  | AX.89449109 | 2.31E+07                | 0.50               | -16.77                | 3.20               | 0.05              |
| E1  | GY    | 1A  | AX.89488071 | 5.92E+08                | 0.43               | 2.32                  | 3.14               | 0.05              |
| E1  | GY    | 1A  | AX.89451237 | 5.92E+08                | 0.43               | 2.32                  | 3.14               | 0.05              |
| E1  | GY    | 1A  | AX.89488071 | 5.92E+08                | 0.43               | 2.32                  | 3.14               | 0.05              |
| E1  | SPM2  | 1A  | AX.89695936 | 3.94E+08                | 0.22               | 24.81                 | 4.54               | 0.08              |
| E1  | GY    | 1A  | AX.89484374 | 3.61E+06                | 0.07               | -4.83                 | 3.73               | 0.07              |
| E1  | GY    | 1A  | AX.89644738 | 2.48E+06                | 0.07               | -4.61                 | 3.45               | 0.05              |
| E1  | GY    | 1A  | AX.89699261 | 3.78E+06                | 0.06               | -5.19                 | 3.36               | 0.06              |
| E1  | SPM2  | 1A  | AX.89312211 | 4.92E+08                | 0.19               | -23.34                | 3.69               | 0.07              |
| E1  | GY    | 1A  | AX.89540921 | 5.57E+08                | 0.06               | -4.73                 | 3.06               | 0.05              |
| E1  | GY    | 1A  | AX.89540921 | 5.57E+08                | 0.06               | -4.73                 | 3.06               | 0.05              |
| E1  | GY    | 1A  | AX.89484374 | 3.61E+06                | 0.07               | -4.83                 | 3.73               | 0.07              |
| E1  | SPM2  | 1A  | AX.89311190 | 4.87E+08                | 0.34               | -17.31                | 3.11               | 0.05              |
| E1  | GY    | 1A  | AX.89334798 | 4.50E+08                | 0.08               | -5.28                 | 4.80               | 0.08              |
| E1  | GY    | 1A  | AX.89699261 | 3.78E+06                | 0.06               | -5.19                 | 3.36               | 0.06              |
| E1  | GY    | 1A  | AX.89485591 | 5.04E+08                | 0.20               | -3.47                 | 4.44               | 0.08              |
| E1  | GY    | 1A  | AX.89524501 | 5.04E+08                | 0.26               | -2.61                 | 3.15               | 0.05              |
| E1  | GY    | 1A  | AX.89322672 | 5.72E+08                | 0.07               | -4.55                 | 3.04               | 0.05              |
| E1  | GY    | 1A  | AX.89619043 | 5.92E+08                | 0.43               | 2.30                  | 3.11               | 0.05              |
| E1  | GY    | 1A  | AX.89491333 | 3.61E+06                | 0.08               | -4.40                 | 3.50               | 0.06              |
| E1  | GY    | 1A  | AX.89491333 | 3.61E+06                | 0.08               | -4.40                 | 3.50               | 0.06              |
| E1  | SPM2  | 1A  | AX.89356729 | 5.17E+08                | 0.31               | 17.56                 | 3.05               | 0.05              |
| E1  | GY    | 1A  | AX.89654016 | 5.53E+08                | 0.45               | -2.50                 | 3.62               | 0.06              |
| E1  | SPM2  | 1A  | AX.89362965 | 5.03E+06                | 0.08               | 32.89                 | 3.68               | 0.05              |
| E1  | GY    | 1A  | AX.89495233 | 5.75E+08                | 0.06               | -4.73                 | 3.05               | 0.05              |
| E1  | GY    | 1A  | AX.89644738 | 2.48E+06                | 0.07               | -4.61                 | 3.45               | 0.05              |
| E1  | GY    | 1A  | AX.89478953 | 2.48E+06                | 0.08               | -4.31                 | 3.22               | 0.05              |
| E1  | GY    | 1A  | AX.89605611 | 2.38E+06                | 0.08               | -4.31                 | 3.22               | 0.05              |
| E1  | GY    | 1A  | AX.89577136 | 4.74E+08                | 0.07               | -4.40                 | 3.19               | 0.06              |
| E1  | GY    | 1A  | AX.89485591 | 5.04E+08                | 0.20               | -3.47                 | 4.44               | 0.08              |
| E1  | GY    | 1A  | AX.89590002 | 3.76E+06                | 0.08               | -4.58                 | 3.74               | 0.07              |
| E1  | GY    | 1A  | AX.89438586 | 5.55E+08                | 0.34               | -2.55                 | 3.46               | 0.06              |
| E1  | GY    | 1A  | AX.89391296 | 3.61E+06                | 0.08               | -4.69                 | 3.73               | 0.07              |
| E1  | GY    | 1A  | AX.89391296 | 3.61E+06                | 0.08               | -4.69                 | 3.73               | 0.07              |
| E1  | SPM2  | 1A  | AX.89490533 | 2.31E+07                | 0.50               | -16.77                | 3.20               | 0.05              |
| E1  | GY    | 1A  | AX.89593842 | 5.72E+08                | 0.07               | -4.55                 | 3.04               | 0.05              |
| E1  | SPM2  | 1A  | AX.89721814 | 4.87E+08                | 0.33               | -19.05                | 3.62               | 0.06              |
| E1  | GY    | 1A  | AX.89453261 | 5.57E+08                | 0.06               | -4.73                 | 3.06               | 0.05              |
| E1  | GY    | 1A  | AX.89453261 | 5.57E+08                | 0.06               | -4.73                 | 3.06               | 0.05              |
| E1  | GY    | 1A  | AX.89740285 | 4.61E+08                | 0.07               | -5.31                 | 4.42               | 0.08              |
| E1  | GY    | 1A  | AX.89619043 | 5.92E+08                | 0.43               | 2.30                  | 3.11               | 0.05              |
| E1  | SPM2  | 1A  | AX.89504713 | 5.17E+08                | 0.32               | 17.51                 | 3.05               | 0.05              |

|    |      |    |             |          |      |        |      |      |
|----|------|----|-------------|----------|------|--------|------|------|
| E1 | GY   | 1A | AX.89478953 | 2.48E+06 | 0.08 | -4.31  | 3.22 | 0.05 |
| E1 | GY   | 1A | AX.89608660 | 4.50E+08 | 0.08 | -5.28  | 4.80 | 0.09 |
| E1 | SPM2 | 1A | AX.89764618 | 3.93E+08 | 0.18 | 25.14  | 4.12 | 0.08 |
| E1 | GY   | 1A | AX.89338310 | 2.93E+06 | 0.07 | -4.45  | 3.25 | 0.05 |
| E1 | GY   | 1A | AX.89658648 | 5.42E+08 | 0.37 | -2.89  | 4.44 | 0.07 |
| E1 | GY   | 1A | AX.89528878 | 4.61E+08 | 0.10 | -4.84  | 4.65 | 0.09 |
| E1 | SPM2 | 1A | AX.89487050 | 4.87E+08 | 0.34 | -17.31 | 3.11 | 0.05 |
| E1 | GY   | 1A | AX.89634735 | 3.76E+06 | 0.08 | -4.72  | 3.77 | 0.07 |
| E1 | GY   | 1A | AX.89451237 | 5.92E+08 | 0.43 | 2.32   | 3.14 | 0.05 |
| E1 | GY   | 1A | AX.89495233 | 5.75E+08 | 0.06 | -4.73  | 3.05 | 0.05 |
| E1 | GY   | 1A | AX.89605611 | 2.38E+06 | 0.08 | -4.31  | 3.22 | 0.05 |
| E1 | GY   | 1A | AX.89593842 | 5.72E+08 | 0.07 | -4.55  | 3.04 | 0.05 |
| E1 | GY   | 1A | AX.89474547 | 5.92E+08 | 0.43 | 2.32   | 3.14 | 0.05 |
| E1 | GY   | 1A | AX.89619783 | 4.58E+08 | 0.10 | -4.84  | 4.65 | 0.09 |
| E1 | GY   | 1A | AX.89619783 | 4.58E+08 | 0.10 | -4.84  | 4.65 | 0.09 |
| E1 | SPM2 | 1A | AX.89589493 | 4.95E+08 | 0.18 | -24.44 | 3.93 | 0.07 |
| E1 | GY   | 1A | AX.89398992 | 3.61E+06 | 0.07 | -4.83  | 3.73 | 0.07 |
| E1 | GY   | 1A | AX.89398992 | 3.61E+06 | 0.07 | -4.83  | 3.73 | 0.07 |
| E1 | GY   | 1A | AX.89318842 | 3.61E+06 | 0.07 | -4.83  | 3.73 | 0.07 |
| E1 | SPM2 | 1A | AX.89720387 | 4.87E+08 | 0.34 | -17.31 | 3.11 | 0.05 |
| E1 | SPM2 | 1A | AX.89403547 | 4.85E+08 | 0.34 | -17.31 | 3.11 | 0.05 |
| E1 | GY   | 1A | AX.89757813 | 4.75E+08 | 0.09 | -4.58  | 4.07 | 0.08 |
| E1 | GY   | 1A | AX.89757813 | 4.75E+08 | 0.09 | -4.58  | 4.07 | 0.08 |
| E1 | SPM2 | 1A | AX.89694178 | 3.95E+08 | 0.16 | 23.00  | 3.28 | 0.06 |
| E1 | GY   | 1A | AX.89520705 | 5.53E+08 | 0.45 | -2.71  | 4.15 | 0.07 |
| E1 | GY   | 1A | AX.89322672 | 5.72E+08 | 0.07 | -4.55  | 3.04 | 0.05 |
| E1 | GY   | 1A | AX.89634735 | 3.76E+06 | 0.08 | -4.72  | 3.77 | 0.07 |
| E1 | SPM2 | 1A | AX.89548200 | 4.95E+08 | 0.18 | -24.44 | 3.93 | 0.07 |
| E1 | GY   | 1A | AX.89334798 | 4.50E+08 | 0.08 | -5.28  | 4.80 | 0.08 |
| E1 | GPS  | 1A | AX.89760863 | 5.91E+08 | 0.50 | 1.21   | 3.57 | 0.06 |
| E1 | GPS  | 1A | AX.89346156 | 5.91E+08 | 0.50 | 1.21   | 3.57 | 0.06 |
| E1 | GPS  | 1A | AX.89750662 | 4.61E+08 | 0.10 | -1.89  | 3.14 | 0.05 |
| E1 | GPS  | 1A | AX.89451237 | 5.92E+08 | 0.43 | 1.22   | 3.55 | 0.06 |
| E1 | GY   | 1A | AX.89365795 | 3.78E+06 | 0.08 | -4.72  | 3.77 | 0.07 |
| E1 | GPS  | 1A | AX.89384857 | 5.94E+08 | 0.32 | 1.22   | 3.18 | 0.06 |
| E1 | GPS  | 1A | AX.89474547 | 5.92E+08 | 0.43 | 1.22   | 3.55 | 0.06 |
| E1 | GY   | 1A | AX.89747039 | 4.75E+08 | 0.10 | -4.72  | 4.62 | 0.09 |
| E1 | GPS  | 1A | AX.89386468 | 5.91E+08 | 0.50 | 1.21   | 3.57 | 0.06 |
| E1 | GY   | 1A | AX.89577136 | 4.74E+08 | 0.07 | -4.40  | 3.19 | 0.06 |
| E1 | GY   | 1A | AX.89590002 | 3.76E+06 | 0.08 | -4.58  | 3.74 | 0.07 |
| E1 | GPS  | 1A | AX.89533756 | 5.91E+08 | 0.44 | 1.11   | 3.02 | 0.05 |
| E1 | GPS  | 1A | AX.89391152 | 5.91E+08 | 0.49 | 1.20   | 3.52 | 0.06 |
| E1 | GY   | 1A | AX.89495866 | 4.50E+08 | 0.08 | -5.28  | 4.80 | 0.09 |
| E1 | GY   | 1A | AX.89454402 | 4.50E+08 | 0.08 | -5.28  | 4.80 | 0.09 |
| E1 | GY   | 1A | AX.89454402 | 4.50E+08 | 0.08 | -5.28  | 4.80 | 0.09 |
| E1 | GY   | 1A | AX.89608660 | 4.50E+08 | 0.08 | -5.28  | 4.80 | 0.09 |
| E1 | GY   | 1A | AX.89338310 | 2.93E+06 | 0.07 | -4.45  | 3.25 | 0.05 |
| E1 | GY   | 1A | AX.89528878 | 4.61E+08 | 0.10 | -4.84  | 4.65 | 0.09 |
| E1 | GPS  | 1A | AX.89614198 | 5.91E+08 | 0.50 | 1.21   | 3.57 | 0.06 |
| E1 | GY   | 1A | AX.89318842 | 3.61E+06 | 0.07 | -4.83  | 3.73 | 0.07 |

|    |      |    |             |          |      |         |      |      |
|----|------|----|-------------|----------|------|---------|------|------|
| E1 | GY   | 1A | AX.89750662 | 4.61E+08 | 0.10 | -4.84   | 4.65 | 0.09 |
| E1 | GY   | 1A | AX.89740285 | 4.61E+08 | 0.07 | -5.31   | 4.42 | 0.08 |
| E1 | GY   | 1A | AX.89608289 | 2.98E+06 | 0.07 | -4.45   | 3.25 | 0.05 |
| E1 | GY   | 1A | AX.89516165 | 4.50E+08 | 0.10 | -4.59   | 4.24 | 0.08 |
| E1 | GY   | 1A | AX.89747039 | 4.75E+08 | 0.10 | -4.72   | 4.62 | 0.09 |
| E1 | SPM2 | 1A | AX.89418654 | 2.31E+07 | 0.49 | 16.53   | 3.12 | 0.05 |
| E1 | SPM2 | 1A | AX.89421925 | 4.87E+08 | 0.34 | -17.31  | 3.11 | 0.05 |
| E1 | GPM2 | 1A | AX.89451199 | 4.88E+08 | 0.26 | -669.96 | 3.05 | 0.05 |
| E1 | GPS  | 1A | AX.89619043 | 5.92E+08 | 0.43 | 1.20    | 3.43 | 0.06 |
| E1 | GPM2 | 1A | AX.89407832 | 4.88E+08 | 0.25 | -674.26 | 3.02 | 0.05 |
| E1 | GPS  | 1A | AX.89631871 | 5.91E+08 | 0.44 | 1.11    | 3.02 | 0.05 |
| E1 | GY   | 1A | AX.89474547 | 5.92E+08 | 0.43 | 2.32    | 3.14 | 0.05 |
| E1 | GY   | 1A | AX.89652711 | 3.61E+06 | 0.07 | -4.83   | 3.73 | 0.07 |
| E1 | GY   | 1A | AX.89652711 | 3.61E+06 | 0.07 | -4.83   | 3.73 | 0.07 |
| E1 | SPM2 | 1A | AX.89581416 | 5.16E+08 | 0.31 | 17.48   | 3.01 | 0.05 |
| E1 | GY   | 1A | AX.89658648 | 5.42E+08 | 0.37 | -2.89   | 4.44 | 0.07 |
| E1 | GPM2 | 1A | AX.89614198 | 5.91E+08 | 0.50 | 595.98  | 3.12 | 0.05 |
| E1 | GPS  | 1A | AX.89378347 | 5.78E+08 | 0.25 | 1.40    | 3.59 | 0.06 |
| E1 | GY   | 1A | AX.89750662 | 4.61E+08 | 0.10 | -4.84   | 4.65 | 0.09 |
| E1 | GPM2 | 1A | AX.89365920 | 4.88E+08 | 0.25 | -674.26 | 3.02 | 0.05 |
| E1 | GPS  | 1A | AX.86164505 | 5.92E+08 | 0.43 | 1.15    | 3.21 | 0.05 |
| E1 | GPM2 | 1A | AX.89530045 | 4.84E+08 | 0.31 | -649.44 | 3.17 | 0.05 |
| E1 | GPS  | 1A | AX.89705511 | 5.91E+08 | 0.49 | 1.24    | 3.69 | 0.06 |
| E1 | GPM2 | 1A | AX.89509754 | 4.88E+08 | 0.25 | -674.26 | 3.02 | 0.05 |
| E1 | GPS  | 1A | AX.89674096 | 5.94E+08 | 0.32 | 1.22    | 3.18 | 0.06 |
| E1 | GY   | 1A | AX.89520705 | 5.53E+08 | 0.45 | -2.71   | 4.15 | 0.07 |
| E1 | GPS  | 1A | AX.89382888 | 5.94E+08 | 0.32 | 1.22    | 3.18 | 0.06 |
| E1 | GPS  | 1A | AX.89528878 | 4.61E+08 | 0.10 | -1.89   | 3.14 | 0.05 |
| E1 | GPS  | 1A | AX.89488071 | 5.92E+08 | 0.43 | 1.22    | 3.55 | 0.06 |
| E1 | GPS  | 1A | AX.89482831 | 5.92E+08 | 0.49 | -1.18   | 3.42 | 0.06 |
| E1 | GPS  | 1A | AX.89383456 | 5.93E+08 | 0.32 | 1.22    | 3.18 | 0.06 |
| E1 | GY   | 1A | AX.89760283 | 4.76E+08 | 0.20 | -2.86   | 3.10 | 0.05 |
| E1 | GY   | 1A | AX.89760283 | 4.76E+08 | 0.20 | -2.86   | 3.10 | 0.05 |
| E1 | GPS  | 1A | AX.89619783 | 4.58E+08 | 0.10 | -1.89   | 3.14 | 0.05 |
| E1 | GY   | 1A | AX.89516165 | 4.50E+08 | 0.10 | -4.59   | 4.24 | 0.08 |
| E1 | GPM2 | 1A | AX.89632460 | 4.88E+08 | 0.26 | -669.96 | 3.05 | 0.05 |
| E1 | GY   | 1A | AX.89761921 | 4.77E+08 | 0.20 | -3.14   | 3.67 | 0.06 |
| E1 | GY   | 1A | AX.89761921 | 4.77E+08 | 0.20 | -3.14   | 3.67 | 0.06 |
| E1 | GPM2 | 1A | AX.89581657 | 4.88E+08 | 0.27 | -694.82 | 3.27 | 0.05 |
| E1 | GPM2 | 1A | AX.89681974 | 4.84E+08 | 0.31 | -649.44 | 3.17 | 0.05 |
| E1 | GPM2 | 1A | AX.89751748 | 4.86E+08 | 0.27 | -716.25 | 3.51 | 0.06 |
| E1 | GPM2 | 1A | AX.89678176 | 4.88E+08 | 0.25 | -674.26 | 3.02 | 0.05 |
| E1 | GPM2 | 1A | AX.89526150 | 4.82E+08 | 0.31 | -668.47 | 3.30 | 0.06 |
| E1 | GPM2 | 1A | AX.89705511 | 5.91E+08 | 0.49 | 597.01  | 3.13 | 0.05 |
| E1 | GPM2 | 1A | AX.89472485 | 4.88E+08 | 0.25 | -674.26 | 3.02 | 0.05 |
| E1 | GPM2 | 1A | AX.89618201 | 4.82E+08 | 0.31 | -668.47 | 3.30 | 0.06 |
| E1 | GPM2 | 1A | AX.89485591 | 5.04E+08 | 0.20 | -811.46 | 3.66 | 0.07 |
| E1 | GPS  | 1A | AX.89697409 | 5.93E+08 | 0.32 | 1.19    | 3.07 | 0.05 |
| E1 | GPS  | 1A | AX.89380462 | 5.94E+08 | 0.32 | 1.22    | 3.18 | 0.06 |
| E1 | GPM2 | 1A | AX.89644137 | 4.88E+08 | 0.26 | -717.80 | 3.43 | 0.05 |

|    |      |    |             |          |      |          |      |      |
|----|------|----|-------------|----------|------|----------|------|------|
| E1 | GPM2 | 1A | AX.89716972 | 4.88E+08 | 0.25 | -674.26  | 3.02 | 0.05 |
| E1 | GPM2 | 1A | AX.89613533 | 4.88E+08 | 0.27 | -694.82  | 3.27 | 0.05 |
| E1 | GPM2 | 1A | AX.89760863 | 5.91E+08 | 0.50 | 595.98   | 3.12 | 0.05 |
| E1 | GPS  | 1A | AX.89749145 | 5.91E+08 | 0.49 | 1.18     | 3.42 | 0.06 |
| E1 | GPS  | 1A | AX.89709616 | 5.93E+08 | 0.32 | 1.22     | 3.18 | 0.06 |
| E1 | GY   | 1A | AX.89495866 | 4.50E+08 | 0.08 | -5.28    | 4.80 | 0.09 |
| E1 | TKW  | 1A | AX.89584068 | 2.16E+07 | 0.15 | -1.18    | 3.06 | 0.05 |
| E1 | GPM2 | 1A | AX.89631167 | 4.88E+08 | 0.25 | -674.26  | 3.02 | 0.05 |
| E1 | GPS  | 1A | AX.89578979 | 5.93E+08 | 0.32 | 1.22     | 3.18 | 0.06 |
| E1 | TKW  | 1A | AX.89451199 | 4.88E+08 | 0.26 | 0.97     | 3.16 | 0.05 |
| E1 | TKW  | 1A | AX.89759652 | 1.64E+07 | 0.19 | -1.09    | 3.14 | 0.05 |
| E1 | GPM2 | 1A | AX.89495233 | 5.75E+08 | 0.06 | -1393.11 | 3.75 | 0.06 |
| E1 | GPM2 | 1A | AX.89332564 | 4.88E+08 | 0.25 | -674.26  | 3.02 | 0.05 |
| E1 | GPM2 | 1A | AX.89386468 | 5.91E+08 | 0.50 | 595.98   | 3.12 | 0.05 |
| E1 | TKW  | 1A | AX.89366930 | 4.88E+08 | 0.26 | 1.06     | 3.69 | 0.06 |
| E1 | TKW  | 1A | AX.89632460 | 4.88E+08 | 0.26 | 0.97     | 3.16 | 0.05 |
| E1 | GY   | 1A | AX.89608289 | 2.98E+06 | 0.07 | -4.45    | 3.25 | 0.05 |
| E1 | TKW  | 1A | AX.89644137 | 4.88E+08 | 0.26 | 1.00     | 3.32 | 0.06 |
| E1 | TKW  | 1A | AX.89508718 | 1.16E+07 | 0.10 | -1.55    | 3.59 | 0.06 |
| E1 | TKW  | 1A | AX.89628186 | 2.41E+07 | 0.31 | 0.90     | 3.04 | 0.05 |
| E1 | GPM2 | 1A | AX.89346156 | 5.91E+08 | 0.50 | 595.98   | 3.12 | 0.05 |
| E1 | GPM2 | 1A | AX.89366930 | 4.88E+08 | 0.26 | -764.38  | 3.82 | 0.06 |
| E1 | GPM2 | 1A | AX.89532336 | 4.84E+08 | 0.31 | -649.44  | 3.17 | 0.05 |
| E1 | TKW  | 1A | AX.89772366 | 4.82E+08 | 0.26 | 1.04     | 3.53 | 0.06 |
| E1 | TKW  | 1A | AX.89590906 | 1.41E+07 | 0.50 | -0.83    | 3.02 | 0.05 |
| E1 | TKW  | 1A | AX.89535322 | 5.93E+08 | 0.33 | -0.92    | 3.23 | 0.06 |
| E1 | TKW  | 1A | AX.89751748 | 4.86E+08 | 0.27 | 0.95     | 3.15 | 0.05 |
| E1 | TKW  | 1A | AX.89723195 | 5.93E+08 | 0.31 | -0.90    | 3.06 | 0.05 |
| E1 | GPM2 | 1A | AX.89473144 | 4.88E+08 | 0.25 | -674.26  | 3.02 | 0.05 |
| E1 | GPM2 | 1A | AX.89748675 | 4.84E+08 | 0.31 | -649.44  | 3.17 | 0.05 |
| E1 | TKW  | 1A | AX.89588392 | 1.16E+07 | 0.06 | -1.77    | 3.11 | 0.05 |
| E1 | TKW  | 1A | AX.89677919 | 2.41E+07 | 0.31 | 0.90     | 3.04 | 0.05 |
| E1 | TKW  | 1A | AX.89613533 | 4.88E+08 | 0.27 | 0.97     | 3.16 | 0.05 |
| E1 | TKW  | 1A | AX.89581657 | 4.88E+08 | 0.27 | 0.97     | 3.16 | 0.05 |
| E1 | TKW  | 1A | AX.89483593 | 5.73E+08 | 0.05 | -1.94    | 3.17 | 0.05 |
| E1 | TKW  | 1A | AX.89343200 | 4.88E+08 | 0.27 | 0.94     | 3.03 | 0.05 |
| E1 | TKW  | 1A | AX.89346508 | 2.17E+07 | 0.16 | -1.13    | 3.06 | 0.05 |
| E1 | TKW  | 1A | AX.89389331 | 4.88E+08 | 0.27 | 0.94     | 3.01 | 0.05 |
| E2 | GY   | 1A | AX.89492546 | 5.03E+08 | 0.39 | -2.02    | 3.29 | 0.04 |
| E2 | TKW  | 1A | AX.89429909 | 5.73E+08 | 0.07 | 1.85     | 3.30 | 0.06 |
| E2 | SPM2 | 1A | AX.89386026 | 2.53E+08 | 0.07 | 25.80    | 3.54 | 0.06 |
| E2 | GY   | 1A | AX.89330607 | 5.40E+08 | 0.22 | -2.64    | 3.92 | 0.07 |
| E2 | GY   | 1A | AX.89401575 | 5.03E+08 | 0.39 | -1.97    | 3.15 | 0.04 |
| E2 | GY   | 1A | AX.89757813 | 4.75E+08 | 0.09 | -3.56    | 3.56 | 0.06 |
| E2 | GY   | 1A | AX.89760710 | 5.05E+08 | 0.32 | -2.14    | 3.30 | 0.05 |
| E2 | GY   | 1A | AX.89761921 | 4.77E+08 | 0.20 | -2.39    | 3.12 | 0.05 |
| E2 | GY   | 1A | AX.89761921 | 4.77E+08 | 0.20 | -2.39    | 3.12 | 0.05 |
| E2 | GY   | 1A | AX.89380336 | 5.72E+08 | 0.07 | -3.86    | 3.12 | 0.04 |
| E2 | GY   | 1A | AX.89356842 | 5.04E+08 | 0.33 | -2.09    | 3.22 | 0.05 |
| E2 | SPM2 | 1A | AX.89547384 | 2.49E+08 | 0.42 | 12.22    | 3.24 | 0.06 |

|    |      |    |             |          |      |       |      |      |
|----|------|----|-------------|----------|------|-------|------|------|
| E2 | GY   | 1A | AX.89369571 | 5.05E+08 | 0.33 | -2.11 | 3.24 | 0.05 |
| E2 | GY   | 1A | AX.89334474 | 5.05E+08 | 0.33 | -2.11 | 3.24 | 0.05 |
| E2 | GY   | 1A | AX.89334474 | 5.05E+08 | 0.33 | -2.11 | 3.24 | 0.05 |
| E2 | GY   | 1A | AX.89334798 | 4.50E+08 | 0.08 | -3.39 | 3.02 | 0.03 |
| E2 | GY   | 1A | AX.89334798 | 4.50E+08 | 0.08 | -3.39 | 3.02 | 0.03 |
| E2 | SPM2 | 1A | AX.89418526 | 3.77E+08 | 0.07 | 26.28 | 3.87 | 0.07 |
| E2 | GY   | 1A | AX.89763732 | 4.76E+08 | 0.25 | -2.30 | 3.29 | 0.05 |
| E2 | GY   | 1A | AX.89763732 | 4.76E+08 | 0.25 | -2.30 | 3.29 | 0.05 |
| E2 | GY   | 1A | AX.89617974 | 5.04E+08 | 0.23 | -2.26 | 3.09 | 0.05 |
| E2 | GY   | 1A | AX.89692058 | 5.05E+08 | 0.15 | -2.82 | 3.44 | 0.06 |
| E2 | GY   | 1A | AX.89692058 | 5.05E+08 | 0.15 | -2.82 | 3.44 | 0.06 |
| E2 | GY   | 1A | AX.89336298 | 4.74E+08 | 0.40 | -1.92 | 3.03 | 0.04 |
| E2 | SPM2 | 1A | AX.89736079 | 1.71E+08 | 0.21 | 14.67 | 3.17 | 0.05 |
| E2 | GY   | 1A | AX.89383288 | 5.68E+08 | 0.07 | -3.74 | 3.27 | 0.05 |
| E2 | SPM2 | 1A | AX.89515342 | 3.06E+07 | 0.47 | 11.93 | 3.17 | 0.06 |
| E2 | GY   | 1A | AX.89338125 | 5.05E+08 | 0.33 | -2.11 | 3.24 | 0.05 |
| E2 | GY   | 1A | AX.89681579 | 5.05E+08 | 0.15 | -2.82 | 3.44 | 0.06 |
| E2 | GY   | 1A | AX.89445577 | 5.05E+08 | 0.15 | -2.82 | 3.44 | 0.06 |
| E2 | GY   | 1A | AX.89445577 | 5.05E+08 | 0.15 | -2.82 | 3.44 | 0.06 |
| E2 | GY   | 1A | AX.89351069 | 5.05E+08 | 0.33 | -2.11 | 3.24 | 0.05 |
| E2 | GY   | 1A | AX.89722818 | 5.05E+08 | 0.33 | -2.28 | 3.70 | 0.06 |
| E2 | SPM2 | 1A | AX.89651896 | 3.02E+08 | 0.07 | 23.71 | 3.07 | 0.05 |
| E2 | GY   | 1A | AX.89457045 | 5.05E+08 | 0.33 | -2.11 | 3.24 | 0.05 |
| E2 | GY   | 1A | AX.89376432 | 5.05E+08 | 0.33 | -2.11 | 3.24 | 0.05 |
| E2 | GY   | 1A | AX.89376432 | 5.05E+08 | 0.33 | -2.11 | 3.24 | 0.05 |
| E2 | GY   | 1A | AX.89483373 | 5.40E+08 | 0.21 | -2.35 | 3.14 | 0.05 |
| E2 | GY   | 1A | AX.89483373 | 5.40E+08 | 0.21 | -2.35 | 3.14 | 0.05 |
| E2 | GY   | 1A | AX.89729774 | 5.03E+08 | 0.39 | -2.01 | 3.29 | 0.05 |
| E2 | GY   | 1A | AX.89729774 | 5.03E+08 | 0.39 | -2.01 | 3.29 | 0.05 |
| E2 | GY   | 1A | AX.89506699 | 5.05E+08 | 0.15 | -2.82 | 3.44 | 0.06 |
| E2 | GY   | 1A | AX.89506699 | 5.05E+08 | 0.15 | -2.82 | 3.44 | 0.06 |
| E2 | GY   | 1A | AX.89519840 | 5.05E+08 | 0.33 | -2.11 | 3.24 | 0.05 |
| E2 | GY   | 1A | AX.89519840 | 5.05E+08 | 0.33 | -2.11 | 3.24 | 0.05 |
| E2 | GY   | 1A | AX.89496603 | 5.40E+08 | 0.21 | -2.35 | 3.14 | 0.05 |
| E2 | GY   | 1A | AX.89332707 | 5.01E+08 | 0.39 | -2.01 | 3.29 | 0.05 |
| E2 | GY   | 1A | AX.89332707 | 5.01E+08 | 0.39 | -2.01 | 3.29 | 0.05 |
| E2 | GY   | 1A | AX.89700744 | 5.03E+08 | 0.39 | -2.01 | 3.29 | 0.05 |
| E2 | GY   | 1A | AX.89700744 | 5.03E+08 | 0.39 | -2.01 | 3.29 | 0.05 |
| E2 | GY   | 1A | AX.89380336 | 5.72E+08 | 0.07 | -3.86 | 3.12 | 0.04 |
| E2 | GY   | 1A | AX.89416172 | 5.05E+08 | 0.32 | -2.04 | 3.04 | 0.04 |
| E2 | GY   | 1A | AX.89416172 | 5.05E+08 | 0.32 | -2.04 | 3.04 | 0.04 |
| E2 | GY   | 1A | AX.89416233 | 5.03E+08 | 0.39 | -2.02 | 3.29 | 0.04 |
| E2 | GY   | 1A | AX.89416233 | 5.03E+08 | 0.39 | -2.02 | 3.29 | 0.04 |
| E2 | GY   | 1A | AX.89380746 | 5.68E+08 | 0.07 | -3.74 | 3.27 | 0.05 |
| E2 | GY   | 1A | AX.89380746 | 5.68E+08 | 0.07 | -3.74 | 3.27 | 0.05 |
| E2 | GY   | 1A | AX.89345545 | 5.05E+08 | 0.33 | -2.11 | 3.24 | 0.05 |
| E2 | GY   | 1A | AX.89345545 | 5.05E+08 | 0.33 | -2.11 | 3.24 | 0.05 |
| E2 | GY   | 1A | AX.89579559 | 5.41E+08 | 0.20 | -2.45 | 3.22 | 0.05 |
| E2 | GY   | 1A | AX.89579559 | 5.41E+08 | 0.20 | -2.45 | 3.22 | 0.05 |
| E2 | GY   | 1A | AX.89312999 | 5.68E+08 | 0.07 | -3.74 | 3.27 | 0.05 |

|    |    |    |             |          |      |       |      |      |
|----|----|----|-------------|----------|------|-------|------|------|
| E2 | GY | 1A | AX.89312999 | 5.68E+08 | 0.07 | -3.74 | 3.27 | 0.05 |
| E2 | GY | 1A | AX.89524262 | 5.04E+08 | 0.15 | -2.82 | 3.44 | 0.06 |
| E2 | GY | 1A | AX.89524262 | 5.04E+08 | 0.15 | -2.82 | 3.44 | 0.06 |
| E2 | GY | 1A | AX.89739968 | 5.05E+08 | 0.33 | -2.11 | 3.24 | 0.05 |
| E2 | GY | 1A | AX.89739968 | 5.05E+08 | 0.33 | -2.11 | 3.24 | 0.05 |
| E2 | GY | 1A | AX.89777735 | 5.05E+08 | 0.32 | -2.32 | 3.82 | 0.06 |
| E2 | GY | 1A | AX.89777735 | 5.05E+08 | 0.32 | -2.32 | 3.82 | 0.06 |
| E2 | GY | 1A | AX.89740285 | 4.61E+08 | 0.07 | -3.94 | 3.57 | 0.06 |
| E2 | GY | 1A | AX.89740285 | 4.61E+08 | 0.07 | -3.94 | 3.57 | 0.06 |
| E2 | GY | 1A | AX.89594667 | 5.05E+08 | 0.33 | -2.11 | 3.24 | 0.05 |
| E2 | GY | 1A | AX.89594667 | 5.05E+08 | 0.33 | -2.11 | 3.24 | 0.05 |
| E2 | GY | 1A | AX.89382897 | 5.40E+08 | 0.21 | -2.35 | 3.09 | 0.05 |
| E2 | GY | 1A | AX.89382897 | 5.40E+08 | 0.21 | -2.35 | 3.09 | 0.05 |
| E2 | GY | 1A | AX.89383288 | 5.68E+08 | 0.07 | -3.74 | 3.27 | 0.05 |
| E2 | GY | 1A | AX.89431881 | 5.40E+08 | 0.22 | -2.69 | 4.08 | 0.07 |
| E2 | GY | 1A | AX.89431881 | 5.40E+08 | 0.22 | -2.69 | 4.08 | 0.07 |
| E2 | GY | 1A | AX.89741832 | 5.05E+08 | 0.32 | -2.32 | 3.82 | 0.06 |
| E2 | GY | 1A | AX.89741832 | 5.05E+08 | 0.32 | -2.32 | 3.82 | 0.06 |
| E2 | GY | 1A | AX.89384318 | 5.06E+08 | 0.30 | -2.16 | 3.24 | 0.05 |
| E2 | GY | 1A | AX.89384318 | 5.06E+08 | 0.30 | -2.16 | 3.24 | 0.05 |
| E2 | GY | 1A | AX.89653980 | 5.05E+08 | 0.30 | -2.16 | 3.24 | 0.05 |
| E2 | GY | 1A | AX.89653980 | 5.05E+08 | 0.30 | -2.16 | 3.24 | 0.05 |
| E2 | GY | 1A | AX.89397127 | 5.05E+08 | 0.33 | -2.11 | 3.24 | 0.05 |
| E2 | GY | 1A | AX.89527179 | 5.05E+08 | 0.33 | -2.11 | 3.24 | 0.05 |
| E2 | GY | 1A | AX.89527179 | 5.05E+08 | 0.33 | -2.11 | 3.24 | 0.05 |
| E2 | GY | 1A | AX.89743474 | 5.05E+08 | 0.33 | -2.14 | 3.34 | 0.05 |
| E2 | GY | 1A | AX.89743474 | 5.05E+08 | 0.33 | -2.14 | 3.34 | 0.05 |
| E2 | GY | 1A | AX.89317237 | 5.40E+08 | 0.20 | -2.37 | 3.08 | 0.05 |
| E2 | GY | 1A | AX.89317237 | 5.40E+08 | 0.20 | -2.37 | 3.08 | 0.05 |
| E2 | GY | 1A | AX.89499443 | 5.40E+08 | 0.22 | -2.69 | 4.08 | 0.07 |
| E2 | GY | 1A | AX.89499443 | 5.40E+08 | 0.22 | -2.69 | 4.08 | 0.07 |
| E2 | GY | 1A | AX.89706884 | 5.05E+08 | 0.33 | -2.11 | 3.24 | 0.05 |
| E2 | GY | 1A | AX.89706884 | 5.05E+08 | 0.33 | -2.11 | 3.24 | 0.05 |
| E2 | GY | 1A | AX.89351069 | 5.05E+08 | 0.33 | -2.11 | 3.24 | 0.05 |
| E2 | GY | 1A | AX.89628879 | 5.05E+08 | 0.33 | -2.11 | 3.24 | 0.05 |
| E2 | GY | 1A | AX.89628879 | 5.05E+08 | 0.33 | -2.11 | 3.24 | 0.05 |
| E2 | GY | 1A | AX.89598827 | 5.05E+08 | 0.32 | -2.14 | 3.30 | 0.05 |
| E2 | GY | 1A | AX.89598827 | 5.05E+08 | 0.32 | -2.14 | 3.30 | 0.05 |
| E2 | GY | 1A | AX.89457045 | 5.05E+08 | 0.33 | -2.11 | 3.24 | 0.05 |
| E2 | GY | 1A | AX.89744714 | 5.05E+08 | 0.33 | -2.11 | 3.24 | 0.05 |
| E2 | GY | 1A | AX.89744714 | 5.05E+08 | 0.33 | -2.11 | 3.24 | 0.05 |
| E2 | GY | 1A | AX.89387877 | 5.05E+08 | 0.32 | -2.32 | 3.82 | 0.06 |
| E2 | GY | 1A | AX.89387877 | 5.05E+08 | 0.32 | -2.32 | 3.82 | 0.06 |
| E2 | GY | 1A | AX.89673050 | 5.40E+08 | 0.22 | -2.69 | 4.08 | 0.07 |
| E2 | GY | 1A | AX.89673050 | 5.40E+08 | 0.22 | -2.69 | 4.08 | 0.07 |
| E2 | GY | 1A | AX.89636183 | 5.05E+08 | 0.30 | -2.16 | 3.24 | 0.05 |
| E2 | GY | 1A | AX.89636183 | 5.05E+08 | 0.30 | -2.16 | 3.24 | 0.05 |
| E2 | GY | 1A | AX.89757813 | 4.75E+08 | 0.09 | -3.56 | 3.56 | 0.06 |
| E2 | GY | 1A | AX.89747039 | 4.75E+08 | 0.10 | -3.22 | 3.22 | 0.06 |
| E2 | GY | 1A | AX.89747039 | 4.75E+08 | 0.10 | -3.22 | 3.22 | 0.06 |

|    |     |    |             |          |      |       |      |      |
|----|-----|----|-------------|----------|------|-------|------|------|
| E2 | GY  | 1A | AX.89495866 | 4.50E+08 | 0.08 | -3.39 | 3.02 | 0.05 |
| E2 | GY  | 1A | AX.89495866 | 4.50E+08 | 0.08 | -3.39 | 3.02 | 0.05 |
| E2 | GY  | 1A | AX.89321558 | 5.05E+08 | 0.33 | -2.11 | 3.24 | 0.05 |
| E2 | GY  | 1A | AX.89321558 | 5.05E+08 | 0.33 | -2.11 | 3.24 | 0.05 |
| E2 | TKW | 1A | AX.89370608 | 2.09E+07 | 0.26 | -1.12 | 3.52 | 0.07 |
| E2 | GY  | 1A | AX.89321838 | 5.05E+08 | 0.33 | -2.11 | 3.24 | 0.05 |
| E2 | GY  | 1A | AX.89321838 | 5.05E+08 | 0.33 | -2.11 | 3.24 | 0.05 |
| E2 | GY  | 1A | AX.89460271 | 5.40E+08 | 0.21 | -2.35 | 3.09 | 0.05 |
| E2 | GY  | 1A | AX.89460271 | 5.40E+08 | 0.21 | -2.35 | 3.09 | 0.05 |
| E2 | GY  | 1A | AX.89496603 | 5.40E+08 | 0.21 | -2.35 | 3.14 | 0.05 |
| E2 | GY  | 1A | AX.89426368 | 5.46E+08 | 0.05 | -4.39 | 3.14 | 0.04 |
| E2 | GY  | 1A | AX.89484669 | 5.03E+08 | 0.38 | -2.11 | 3.52 | 0.05 |
| E2 | GY  | 1A | AX.89484669 | 5.03E+08 | 0.38 | -2.11 | 3.52 | 0.05 |
| E2 | GY  | 1A | AX.89322580 | 5.05E+08 | 0.33 | -2.11 | 3.24 | 0.05 |
| E2 | GY  | 1A | AX.89322580 | 5.05E+08 | 0.33 | -2.11 | 3.24 | 0.05 |
| E2 | GY  | 1A | AX.89676171 | 5.05E+08 | 0.33 | -2.11 | 3.24 | 0.05 |
| E2 | GY  | 1A | AX.89676171 | 5.05E+08 | 0.33 | -2.11 | 3.24 | 0.05 |
| E2 | GY  | 1A | AX.89323937 | 5.03E+08 | 0.39 | -2.02 | 3.29 | 0.04 |
| E2 | GY  | 1A | AX.89323937 | 5.03E+08 | 0.39 | -2.02 | 3.29 | 0.04 |
| E2 | GY  | 1A | AX.89392808 | 5.68E+08 | 0.07 | -4.67 | 4.31 | 0.07 |
| E2 | GY  | 1A | AX.89392808 | 5.68E+08 | 0.07 | -4.67 | 4.31 | 0.07 |
| E2 | GY  | 1A | AX.89750332 | 5.05E+08 | 0.33 | -2.11 | 3.24 | 0.05 |
| E2 | GY  | 1A | AX.89750332 | 5.05E+08 | 0.33 | -2.11 | 3.24 | 0.05 |
| E2 | GY  | 1A | AX.89358873 | 5.04E+08 | 0.26 | -2.23 | 3.15 | 0.05 |
| E2 | GY  | 1A | AX.89358873 | 5.04E+08 | 0.26 | -2.23 | 3.15 | 0.05 |
| E2 | GY  | 1A | AX.89654297 | 5.03E+08 | 0.39 | -2.01 | 3.29 | 0.05 |
| E2 | GY  | 1A | AX.89654297 | 5.03E+08 | 0.39 | -2.01 | 3.29 | 0.05 |
| E2 | GY  | 1A | AX.89629427 | 5.37E+08 | 0.05 | -4.59 | 3.42 | 0.04 |
| E2 | GY  | 1A | AX.89629427 | 5.37E+08 | 0.05 | -4.59 | 3.42 | 0.04 |
| E2 | GY  | 1A | AX.89326278 | 5.01E+08 | 0.39 | -2.01 | 3.29 | 0.05 |
| E2 | GY  | 1A | AX.89326278 | 5.01E+08 | 0.39 | -2.01 | 3.29 | 0.05 |
| E2 | GY  | 1A | AX.89336298 | 4.74E+08 | 0.40 | -1.92 | 3.03 | 0.04 |
| E2 | GY  | 1A | AX.89431899 | 5.05E+08 | 0.33 | -2.11 | 3.24 | 0.05 |
| E2 | GY  | 1A | AX.89431899 | 5.05E+08 | 0.33 | -2.11 | 3.24 | 0.05 |
| E2 | GY  | 1A | AX.89465558 | 5.40E+08 | 0.21 | -2.35 | 3.14 | 0.05 |
| E2 | GY  | 1A | AX.89397127 | 5.05E+08 | 0.33 | -2.11 | 3.24 | 0.05 |
| E2 | GY  | 1A | AX.89537351 | 5.03E+08 | 0.39 | -2.10 | 3.52 | 0.05 |
| E2 | GY  | 1A | AX.89537351 | 5.03E+08 | 0.39 | -2.10 | 3.52 | 0.05 |
| E2 | GY  | 1A | AX.89327850 | 5.05E+08 | 0.20 | -2.52 | 3.39 | 0.05 |
| E2 | GY  | 1A | AX.89327850 | 5.05E+08 | 0.20 | -2.52 | 3.39 | 0.05 |
| E2 | GY  | 1A | AX.89398098 | 5.01E+08 | 0.39 | -2.01 | 3.29 | 0.05 |
| E2 | GY  | 1A | AX.89398098 | 5.01E+08 | 0.39 | -2.01 | 3.29 | 0.05 |
| E2 | GY  | 1A | AX.89398334 | 5.05E+08 | 0.32 | -2.32 | 3.82 | 0.06 |
| E2 | GY  | 1A | AX.89398334 | 5.05E+08 | 0.32 | -2.32 | 3.82 | 0.06 |
| E2 | GY  | 1A | AX.89538619 | 5.05E+08 | 0.33 | -2.14 | 3.34 | 0.05 |
| E2 | GY  | 1A | AX.89538619 | 5.05E+08 | 0.33 | -2.14 | 3.34 | 0.05 |
| E2 | GY  | 1A | AX.89492546 | 5.03E+08 | 0.39 | -2.02 | 3.29 | 0.04 |
| E2 | GY  | 1A | AX.89375325 | 5.03E+08 | 0.39 | -2.01 | 3.29 | 0.05 |
| E2 | GY  | 1A | AX.89363858 | 5.05E+08 | 0.33 | -2.11 | 3.24 | 0.05 |
| E2 | GY  | 1A | AX.89570128 | 5.04E+08 | 0.38 | -2.14 | 3.62 | 0.05 |

|    |      |    |             |          |      |          |      |      |
|----|------|----|-------------|----------|------|----------|------|------|
| E2 | GY   | 1A | AX.89364537 | 5.05E+08 | 0.32 | -2.25    | 3.59 | 0.05 |
| E2 | GY   | 1A | AX.89364537 | 5.05E+08 | 0.32 | -2.25    | 3.59 | 0.05 |
| E2 | GPM2 | 1A | AX.89429909 | 5.73E+08 | 0.07 | -1224.30 | 4.47 | 0.08 |
| E2 | GY   | 1A | AX.89330607 | 5.40E+08 | 0.22 | -2.64    | 3.92 | 0.07 |
| E2 | GY   | 1A | AX.89684853 | 5.40E+08 | 0.21 | -2.35    | 3.09 | 0.05 |
| E2 | GY   | 1A | AX.89684853 | 5.40E+08 | 0.21 | -2.35    | 3.09 | 0.05 |
| E2 | GY   | 1A | AX.89401575 | 5.03E+08 | 0.39 | -1.97    | 3.15 | 0.04 |
| E2 | GY   | 1A | AX.89484484 | 5.06E+08 | 0.30 | -2.16    | 3.24 | 0.05 |
| E2 | GY   | 1A | AX.89719310 | 5.06E+08 | 0.20 | -2.34    | 3.06 | 0.05 |
| E2 | GY   | 1A | AX.89542027 | 5.40E+08 | 0.21 | -2.35    | 3.14 | 0.05 |
| E2 | GY   | 1A | AX.89542027 | 5.40E+08 | 0.21 | -2.35    | 3.14 | 0.05 |
| E2 | GY   | 1A | AX.89402369 | 5.04E+08 | 0.33 | -2.09    | 3.22 | 0.05 |
| E2 | GY   | 1A | AX.89402369 | 5.04E+08 | 0.33 | -2.09    | 3.22 | 0.05 |
| E2 | GY   | 1A | AX.89736384 | 5.05E+08 | 0.33 | -2.11    | 3.24 | 0.05 |
| E2 | GY   | 1A | AX.89760710 | 5.05E+08 | 0.32 | -2.14    | 3.30 | 0.05 |
| E2 | GY   | 1A | AX.89577707 | 5.05E+08 | 0.33 | -2.11    | 3.24 | 0.05 |
| E2 | TKW  | 1A | AX.89706863 | 2.17E+07 | 0.17 | -1.24    | 3.22 | 0.05 |
| E2 | GY   | 1A | AX.89415545 | 5.05E+08 | 0.33 | -2.11    | 3.24 | 0.05 |
| E2 | GY   | 1A | AX.89521467 | 5.05E+08 | 0.33 | -2.11    | 3.24 | 0.05 |
| E2 | GY   | 1A | AX.89356842 | 5.04E+08 | 0.33 | -2.09    | 3.22 | 0.05 |
| E2 | GY   | 1A | AX.89369571 | 5.05E+08 | 0.33 | -2.11    | 3.24 | 0.05 |
| E2 | GY   | 1A | AX.89600738 | 5.02E+08 | 0.39 | -2.09    | 3.49 | 0.05 |
| E2 | GY   | 1A | AX.89608660 | 4.50E+08 | 0.08 | -3.39    | 3.02 | 0.05 |
| E2 | GY   | 1A | AX.89617974 | 5.04E+08 | 0.23 | -2.26    | 3.09 | 0.05 |
| E2 | GY   | 1A | AX.89465558 | 5.40E+08 | 0.21 | -2.35    | 3.14 | 0.05 |
| E2 | GY   | 1A | AX.89337165 | 5.05E+08 | 0.32 | -2.38    | 3.96 | 0.06 |
| E2 | GY   | 1A | AX.89337165 | 5.05E+08 | 0.32 | -2.38    | 3.96 | 0.06 |
| E2 | GY   | 1A | AX.89655864 | 5.05E+08 | 0.33 | -2.23    | 3.55 | 0.05 |
| E2 | GY   | 1A | AX.89655864 | 5.05E+08 | 0.33 | -2.23    | 3.55 | 0.05 |
| E2 | GY   | 1A | AX.89338125 | 5.05E+08 | 0.33 | -2.11    | 3.24 | 0.05 |
| E2 | GY   | 1A | AX.89681579 | 5.05E+08 | 0.15 | -2.82    | 3.44 | 0.06 |
| E2 | GY   | 1A | AX.89538300 | 5.01E+08 | 0.39 | -2.01    | 3.29 | 0.05 |
| E2 | GY   | 1A | AX.89538300 | 5.01E+08 | 0.39 | -2.01    | 3.29 | 0.05 |
| E2 | GY   | 1A | AX.89722818 | 5.05E+08 | 0.33 | -2.28    | 3.70 | 0.06 |
| E2 | GY   | 1A | AX.89351520 | 5.05E+08 | 0.33 | -2.14    | 3.34 | 0.05 |
| E2 | GY   | 1A | AX.89375325 | 5.03E+08 | 0.39 | -2.01    | 3.29 | 0.05 |
| E2 | GPS  | 1A | AX.89378347 | 5.78E+08 | 0.25 | 1.62     | 3.43 | 0.06 |
| E2 | GY   | 1A | AX.89660138 | 5.05E+08 | 0.33 | -2.14    | 3.34 | 0.05 |
| E2 | GY   | 1A | AX.89660138 | 5.05E+08 | 0.33 | -2.14    | 3.34 | 0.05 |
| E2 | GY   | 1A | AX.89648239 | 5.05E+08 | 0.33 | -2.11    | 3.24 | 0.05 |
| E2 | GY   | 1A | AX.89648239 | 5.05E+08 | 0.33 | -2.11    | 3.24 | 0.05 |
| E2 | GY   | 1A | AX.89484484 | 5.06E+08 | 0.30 | -2.16    | 3.24 | 0.05 |
| E2 | GY   | 1A | AX.89507183 | 5.05E+08 | 0.33 | -2.11    | 3.24 | 0.05 |
| E2 | GY   | 1A | AX.89699261 | 3.78E+06 | 0.06 | -4.27    | 3.29 | 0.06 |
| E2 | GY   | 1A | AX.89736384 | 5.05E+08 | 0.33 | -2.11    | 3.24 | 0.05 |
| E2 | GY   | 1A | AX.89736876 | 5.05E+08 | 0.24 | -2.33    | 3.30 | 0.05 |
| E2 | GY   | 1A | AX.89736876 | 5.05E+08 | 0.24 | -2.33    | 3.30 | 0.05 |
| E2 | GY   | 1A | AX.89415545 | 5.05E+08 | 0.33 | -2.11    | 3.24 | 0.05 |
| E2 | GY   | 1A | AX.89521467 | 5.05E+08 | 0.33 | -2.11    | 3.24 | 0.05 |
| E2 | GY   | 1A | AX.89749368 | 5.05E+08 | 0.32 | -2.32    | 3.82 | 0.06 |



|    |     |    |             |          |      |       |      |      |
|----|-----|----|-------------|----------|------|-------|------|------|
| E2 | GY  | 1A | AX.89749368 | 5.05E+08 | 0.32 | -2.32 | 3.82 | 0.06 |
| E2 | GY  | 1A | AX.89639528 | 5.40E+08 | 0.21 | -2.35 | 3.14 | 0.05 |
| E2 | GY  | 1A | AX.89639528 | 5.40E+08 | 0.21 | -2.35 | 3.14 | 0.05 |
| E2 | GY  | 1A | AX.89346530 | 5.03E+08 | 0.39 | -2.01 | 3.29 | 0.05 |
| E2 | GY  | 1A | AX.89346530 | 5.03E+08 | 0.39 | -2.01 | 3.29 | 0.05 |
| E2 | GY  | 1A | AX.89569895 | 5.05E+08 | 0.33 | -2.11 | 3.24 | 0.05 |
| E2 | GY  | 1A | AX.89419058 | 5.40E+08 | 0.21 | -2.35 | 3.14 | 0.05 |
| E2 | GY  | 1A | AX.89419058 | 5.40E+08 | 0.21 | -2.35 | 3.14 | 0.05 |
| E2 | GY  | 1A | AX.89419399 | 5.03E+08 | 0.39 | -2.02 | 3.29 | 0.04 |
| E2 | GY  | 1A | AX.89419399 | 5.03E+08 | 0.39 | -2.02 | 3.29 | 0.04 |
| E2 | GY  | 1A | AX.89454402 | 4.50E+08 | 0.08 | -3.39 | 3.02 | 0.05 |
| E2 | GY  | 1A | AX.89454402 | 4.50E+08 | 0.08 | -3.39 | 3.02 | 0.05 |
| E2 | GY  | 1A | AX.89469304 | 5.05E+08 | 0.33 | -2.11 | 3.24 | 0.05 |
| E2 | GY  | 1A | AX.89469304 | 5.05E+08 | 0.33 | -2.11 | 3.24 | 0.05 |
| E2 | TKW | 1A | AX.89319322 | 2.16E+07 | 0.17 | -1.24 | 3.22 | 0.05 |
| E2 | GY  | 1A | AX.89744167 | 5.03E+08 | 0.39 | -2.02 | 3.29 | 0.04 |
| E2 | GY  | 1A | AX.89744167 | 5.03E+08 | 0.39 | -2.02 | 3.29 | 0.04 |
| E2 | GY  | 1A | AX.89351520 | 5.05E+08 | 0.33 | -2.14 | 3.34 | 0.05 |
| E2 | GY  | 1A | AX.89363858 | 5.05E+08 | 0.33 | -2.11 | 3.24 | 0.05 |
| E2 | GY  | 1A | AX.89570128 | 5.04E+08 | 0.38 | -2.14 | 3.62 | 0.05 |
| E2 | TKW | 1A | AX.89494091 | 2.16E+07 | 0.15 | -1.34 | 3.44 | 0.06 |
| E2 | GY  | 1A | AX.89682387 | 5.40E+08 | 0.21 | -2.35 | 3.14 | 0.05 |
| E2 | GY  | 1A | AX.89682387 | 5.40E+08 | 0.21 | -2.35 | 3.14 | 0.05 |
| E2 | TKW | 1A | AX.89574309 | 2.16E+07 | 0.16 | -1.32 | 3.42 | 0.06 |
| E2 | GY  | 1A | AX.89635890 | 5.05E+08 | 0.29 | -2.11 | 3.08 | 0.05 |
| E2 | TKW | 1A | AX.89440584 | 2.16E+07 | 0.21 | -1.19 | 3.45 | 0.06 |
| E2 | GY  | 1A | AX.89638843 | 4.93E+08 | 0.37 | -1.96 | 3.08 | 0.05 |
| E2 | GY  | 1A | AX.89638843 | 4.93E+08 | 0.37 | -1.96 | 3.08 | 0.05 |
| E2 | GY  | 1A | AX.89507183 | 5.05E+08 | 0.33 | -2.11 | 3.24 | 0.05 |
| E2 | GY  | 1A | AX.89632269 | 5.03E+08 | 0.39 | -2.02 | 3.29 | 0.04 |
| E2 | GY  | 1A | AX.89632269 | 5.03E+08 | 0.39 | -2.02 | 3.29 | 0.04 |
| E2 | GY  | 1A | AX.89699261 | 3.78E+06 | 0.06 | -4.27 | 3.29 | 0.06 |
| E2 | GY  | 1A | AX.89426368 | 5.46E+08 | 0.05 | -4.39 | 3.14 | 0.04 |
| E2 | GY  | 1A | AX.89577707 | 5.05E+08 | 0.33 | -2.11 | 3.24 | 0.05 |
| E2 | GY  | 1A | AX.89535903 | 5.05E+08 | 0.15 | -2.82 | 3.44 | 0.06 |
| E2 | GY  | 1A | AX.89600738 | 5.02E+08 | 0.39 | -2.09 | 3.49 | 0.05 |
| E2 | GY  | 1A | AX.89738587 | 5.01E+08 | 0.39 | -2.01 | 3.29 | 0.05 |
| E2 | GY  | 1A | AX.89409765 | 5.74E+08 | 0.18 | -3.01 | 4.26 | 0.08 |
| E2 | GY  | 1A | AX.89409765 | 5.74E+08 | 0.18 | -3.01 | 4.26 | 0.08 |
| E2 | GY  | 1A | AX.89657762 | 5.04E+08 | 0.39 | -2.02 | 3.29 | 0.04 |
| E2 | GY  | 1A | AX.89485112 | 5.40E+08 | 0.21 | -2.35 | 3.14 | 0.05 |
| E2 | GY  | 1A | AX.89485112 | 5.40E+08 | 0.21 | -2.35 | 3.14 | 0.05 |
| E2 | GY  | 1A | AX.89569895 | 5.05E+08 | 0.33 | -2.11 | 3.24 | 0.05 |
| E2 | GY  | 1A | AX.89535903 | 5.05E+08 | 0.15 | -2.82 | 3.44 | 0.06 |
| E2 | GY  | 1A | AX.89570710 | 5.05E+08 | 0.33 | -2.28 | 3.70 | 0.06 |
| E2 | GY  | 1A | AX.89570710 | 5.05E+08 | 0.33 | -2.28 | 3.70 | 0.06 |
| E2 | GY  | 1A | AX.89537350 | 5.02E+08 | 0.39 | -2.01 | 3.29 | 0.05 |
| E2 | GY  | 1A | AX.89537350 | 5.02E+08 | 0.39 | -2.01 | 3.29 | 0.05 |
| E2 | GY  | 1A | AX.89765317 | 5.05E+08 | 0.33 | -2.11 | 3.24 | 0.05 |
| E2 | GY  | 1A | AX.89657762 | 5.04E+08 | 0.39 | -2.02 | 3.29 | 0.04 |

|    |      |    |             |          |      |          |      |      |
|----|------|----|-------------|----------|------|----------|------|------|
| E2 | TKW  | 1A | AX.89584068 | 2.16E+07 | 0.15 | -1.41    | 3.67 | 0.06 |
| E2 | GY   | 1A | AX.89700128 | 5.03E+08 | 0.39 | -2.02    | 3.29 | 0.04 |
| E2 | TKW  | 1A | AX.89578895 | 2.31E+07 | 0.50 | 0.91     | 3.07 | 0.05 |
| E2 | GY   | 1A | AX.89635890 | 5.05E+08 | 0.29 | -2.11    | 3.08 | 0.05 |
| E2 | GY   | 1A | AX.89719310 | 5.06E+08 | 0.20 | -2.34    | 3.06 | 0.05 |
| E2 | TKW  | 1A | AX.89714226 | 4.81E+08 | 0.06 | -1.88    | 3.03 | 0.05 |
| E2 | GY   | 1A | AX.89414928 | 5.03E+08 | 0.39 | -2.02    | 3.29 | 0.04 |
| E2 | GY   | 1A | AX.89760969 | 5.05E+08 | 0.33 | -2.11    | 3.24 | 0.05 |
| E2 | TKW  | 1A | AX.89408380 | 2.16E+07 | 0.20 | 1.15     | 3.14 | 0.06 |
| E2 | TKW  | 1A | AX.89380066 | 4.77E+08 | 0.22 | -1.11    | 3.10 | 0.05 |
| E2 | GY   | 1A | AX.89608660 | 4.50E+08 | 0.08 | -3.39    | 3.02 | 0.05 |
| E2 | TKW  | 1A | AX.89448839 | 2.16E+07 | 0.15 | -1.34    | 3.44 | 0.06 |
| E2 | GY   | 1A | AX.89700128 | 5.03E+08 | 0.39 | -2.02    | 3.29 | 0.04 |
| E2 | TKW  | 1A | AX.89666034 | 2.17E+07 | 0.15 | -1.30    | 3.13 | 0.05 |
| E2 | GY   | 1A | AX.89760969 | 5.05E+08 | 0.33 | -2.11    | 3.24 | 0.05 |
| E2 | GY   | 1A | AX.89730577 | 5.40E+08 | 0.21 | -2.35    | 3.14 | 0.05 |
| E2 | GY   | 1A | AX.89487373 | 5.03E+08 | 0.39 | -2.01    | 3.29 | 0.05 |
| E2 | GY   | 1A | AX.89487373 | 5.03E+08 | 0.39 | -2.01    | 3.29 | 0.05 |
| E2 | GY   | 1A | AX.89596164 | 5.05E+08 | 0.32 | -2.13    | 3.26 | 0.05 |
| E2 | TKW  | 1A | AX.89728010 | 2.17E+07 | 0.15 | -1.29    | 3.10 | 0.05 |
| E2 | TKW  | 1A | AX.89463679 | 2.17E+07 | 0.15 | -1.26    | 3.09 | 0.05 |
| E2 | GY   | 1A | AX.89765317 | 5.05E+08 | 0.33 | -2.11    | 3.24 | 0.05 |
| E2 | GY   | 1A | AX.89414928 | 5.03E+08 | 0.39 | -2.02    | 3.29 | 0.04 |
| E2 | GY   | 1A | AX.89738587 | 5.01E+08 | 0.39 | -2.01    | 3.29 | 0.05 |
| E2 | TKW  | 1A | AX.89750504 | 2.09E+07 | 0.26 | -1.11    | 3.47 | 0.07 |
| E2 | TKW  | 1A | AX.89542340 | 2.09E+07 | 0.26 | -1.10    | 3.38 | 0.06 |
| E2 | TKW  | 1A | AX.89557788 | 2.16E+07 | 0.19 | 1.19     | 3.23 | 0.06 |
| E2 | TKW  | 1A | AX.89346508 | 2.17E+07 | 0.16 | -1.32    | 3.51 | 0.06 |
| E2 | TKW  | 1A | AX.89602125 | 2.17E+07 | 0.15 | -1.34    | 3.44 | 0.06 |
| E2 | GY   | 1A | AX.89697471 | 5.05E+08 | 0.33 | -2.11    | 3.24 | 0.05 |
| E2 | GY   | 1A | AX.89596164 | 5.05E+08 | 0.32 | -2.13    | 3.26 | 0.05 |
| E2 | TKW  | 1A | AX.89655153 | 2.16E+07 | 0.15 | -1.34    | 3.44 | 0.06 |
| E2 | TKW  | 1A | AX.89590906 | 1.41E+07 | 0.50 | -0.94    | 3.24 | 0.06 |
| E2 | GY   | 1A | AX.89730577 | 5.40E+08 | 0.21 | -2.35    | 3.14 | 0.05 |
| E2 | TKW  | 1A | AX.89418654 | 2.31E+07 | 0.49 | -0.99    | 3.56 | 0.06 |
| E2 | TKW  | 1A | AX.89366384 | 2.17E+07 | 0.17 | -1.24    | 3.22 | 0.05 |
| E2 | TKW  | 1A | AX.89476670 | 4.81E+08 | 0.24 | -1.09    | 3.22 | 0.05 |
| E2 | GY   | 1A | AX.89697471 | 5.05E+08 | 0.33 | -2.11    | 3.24 | 0.05 |
| E2 | TKW  | 1A | AX.89534876 | 2.17E+07 | 0.15 | -1.31    | 3.22 | 0.05 |
| E2 | TKW  | 1A | AX.89378885 | 2.16E+07 | 0.15 | -1.34    | 3.44 | 0.06 |
| E2 | TKW  | 1A | AX.89407344 | 2.02E+07 | 0.35 | -0.99    | 3.26 | 0.06 |
| E2 | TKW  | 1A | AX.89663788 | 2.16E+07 | 0.15 | -1.34    | 3.44 | 0.06 |
| E2 | TKW  | 1A | AX.89534049 | 4.78E+08 | 0.22 | -1.16    | 3.34 | 0.06 |
| E3 | GPM2 | 1A | AX.89464130 | 4.82E+08 | 0.26 | -969.29  | 3.01 | 0.00 |
| E3 | GPM2 | 1A | AX.89703711 | 4.82E+08 | 0.26 | -991.37  | 3.06 | 0.01 |
| E3 | GPM2 | 1A | AX.89632557 | 4.82E+08 | 0.26 | -991.37  | 3.06 | 0.01 |
| E3 | GPM2 | 1A | AX.89557563 | 4.82E+08 | 0.21 | -1143.48 | 3.52 | 0.00 |
| E3 | GPM2 | 1A | AX.89508163 | 4.82E+08 | 0.26 | -991.37  | 3.06 | 0.01 |
| E3 | GPM2 | 1A | AX.89664895 | 4.82E+08 | 0.21 | -1148.29 | 3.43 | 0.00 |
| E3 | GPM2 | 1A | AX.89727551 | 4.82E+08 | 0.21 | -1151.91 | 3.51 | 0.00 |

|    |      |    |             |          |      |          |      |      |
|----|------|----|-------------|----------|------|----------|------|------|
| E3 | GPM2 | 1A | AX.89755257 | 4.82E+08 | 0.21 | -1153.39 | 3.52 | 0.00 |
| E3 | GPM2 | 1A | AX.89432032 | 4.82E+08 | 0.21 | -1151.91 | 3.51 | 0.00 |
| E3 | GPM2 | 1A | AX.89718387 | 4.82E+08 | 0.21 | -1151.91 | 3.51 | 0.00 |
| E3 | GPM2 | 1A | AX.89364617 | 4.82E+08 | 0.21 | -1151.91 | 3.51 | 0.00 |
| E3 | GPM2 | 1A | AX.89450425 | 4.82E+08 | 0.21 | -1151.91 | 3.51 | 0.00 |
| E3 | GPM2 | 1A | AX.89523174 | 4.82E+08 | 0.21 | -1151.91 | 3.51 | 0.00 |
| E3 | GPM2 | 1A | AX.89375214 | 5.86E+08 | 0.10 | -1361.62 | 3.13 | 0.06 |
| E3 | GPM2 | 1A | AX.89375577 | 5.87E+08 | 0.10 | -1366.10 | 3.10 | 0.06 |
| E3 | GPM2 | 1A | AX.89484684 | 4.82E+08 | 0.21 | -1214.94 | 3.79 | 0.01 |
| E3 | GPM2 | 1A | AX.89443881 | 4.82E+08 | 0.21 | -1106.15 | 3.27 | 0.00 |
| E3 | GPM2 | 1A | AX.89594129 | 4.82E+08 | 0.21 | -1131.02 | 3.35 | 0.00 |
| E3 | GPM2 | 1A | AX.89597359 | 4.82E+08 | 0.40 | -893.87  | 3.12 | 0.00 |
| E3 | GPM2 | 1A | AX.89526819 | 4.82E+08 | 0.40 | -893.87  | 3.12 | 0.00 |
| E3 | GPM2 | 1A | AX.89693123 | 4.82E+08 | 0.38 | -966.17  | 3.45 | 0.00 |
| E3 | GPM2 | 1A | AX.89574228 | 4.82E+08 | 0.38 | -966.17  | 3.45 | 0.00 |
| E3 | GPM2 | 1A | AX.89532401 | 4.82E+08 | 0.26 | -993.82  | 3.11 | 0.01 |
| E3 | GPM2 | 1A | AX.89343225 | 4.82E+08 | 0.26 | -993.82  | 3.11 | 0.01 |
| E3 | GY   | 1A | AX.89693123 | 4.82E+08 | 0.38 | -3.16    | 3.31 | 0.00 |
| E3 | GY   | 1A | AX.89574228 | 4.82E+08 | 0.38 | -3.16    | 3.31 | 0.00 |
| E3 | GY   | 1A | AX.89484684 | 4.82E+08 | 0.21 | -3.70    | 3.21 | 0.01 |
| E3 | GY   | 1A | AX.89392150 | 5.68E+08 | 0.18 | -3.82    | 3.23 | 0.08 |
| E3 | GY   | 1A | AX.89375214 | 5.86E+08 | 0.10 | -4.78    | 3.40 | 0.08 |
| E3 | GY   | 1A | AX.89375577 | 5.87E+08 | 0.10 | -4.53    | 3.05 | 0.08 |
| E3 | GPS  | 1A | AX.89604352 | 1.24E+07 | 0.29 | 2.19     | 3.26 | 0.08 |
| E3 | GPS  | 1A | AX.89571090 | 1.24E+07 | 0.29 | 2.12     | 3.06 | 0.08 |
| E3 | GPS  | 1A | AX.89355817 | 1.25E+07 | 0.28 | 2.33     | 3.45 | 0.10 |
| E3 | GPS  | 1A | AX.89604123 | 1.39E+07 | 0.24 | 2.44     | 3.42 | 0.10 |
| E3 | GPS  | 1A | AX.89408581 | 1.40E+07 | 0.26 | 2.59     | 4.14 | 0.11 |
| E3 | GPS  | 1A | AX.89507359 | 1.40E+07 | 0.27 | 2.52     | 3.89 | 0.10 |
| E3 | GPS  | 1A | AX.89362896 | 1.40E+07 | 0.26 | 2.27     | 3.17 | 0.09 |
| E3 | GPS  | 1A | AX.89495208 | 1.40E+07 | 0.28 | 2.65     | 4.33 | 0.11 |
| E3 | GPS  | 1A | AX.89662596 | 1.40E+07 | 0.27 | 2.52     | 3.89 | 0.10 |
| E3 | GPS  | 1A | AX.89370300 | 1.41E+07 | 0.26 | 2.27     | 3.17 | 0.09 |
| E3 | GPS  | 1A | AX.89494107 | 1.41E+07 | 0.26 | 2.27     | 3.17 | 0.09 |
| E3 | GPS  | 1A | AX.89588489 | 1.41E+07 | 0.17 | 3.08     | 3.72 | 0.11 |
| E3 | GPS  | 1A | AX.89318290 | 5.64E+08 | 0.18 | 2.81     | 3.47 | 0.11 |
| E3 | GPS  | 1A | AX.89415841 | 5.79E+08 | 0.42 | -1.95    | 3.19 | 0.07 |
| E3 | GPS  | 1A | AX.89511417 | 5.83E+08 | 0.42 | 1.92     | 3.01 | 0.03 |
| E3 | GPS  | 1A | AX.89732974 | 5.83E+08 | 0.42 | 1.92     | 3.01 | 0.03 |
| E3 | GPS  | 1A | AX.89434555 | 5.83E+08 | 0.42 | 1.92     | 3.01 | 0.03 |
| E3 | GPS  | 1A | AX.89694162 | 5.83E+08 | 0.42 | 1.92     | 3.01 | 0.03 |
| E3 | SPM2 | 1A | AX.89510856 | 2.92E+07 | 0.32 | 21.29    | 3.14 | 0.05 |
| E3 | SPM2 | 1A | AX.89764618 | 3.93E+08 | 0.48 | 23.08    | 4.01 | 0.06 |
| E3 | SPM2 | 1A | AX.89772406 | 4.03E+08 | 0.34 | 25.56    | 4.47 | 0.06 |
| E3 | SPM2 | 1A | AX.89438882 | 4.06E+08 | 0.46 | -25.72   | 4.60 | 0.07 |
| E3 | SPM2 | 1A | AX.89764057 | 4.36E+08 | 0.16 | 29.26    | 3.82 | 0.03 |
| E3 | SPM2 | 1A | AX.89352646 | 5.35E+08 | 0.48 | -20.50   | 3.04 | 0.05 |
| E3 | SPM2 | 1A | AX.89736206 | 5.40E+08 | 0.06 | 40.75    | 3.02 | 0.04 |
| E3 | TKW  | 1A | AX.89733294 | 5.01E+08 | 0.14 | 1.17     | 3.04 | 0.00 |
| E4 | GPM2 | 1A | AX.89604123 | 1.39E+07 | 0.25 | 536.11   | 3.55 | 0.07 |

|    |      |    |               |          |      |         |      |      |
|----|------|----|---------------|----------|------|---------|------|------|
| E4 | GPM2 | 1A | AX.89665757   | 1.40E+07 | 0.23 | 518.49  | 3.20 | 0.06 |
| E4 | GPM2 | 1A | AX.89520082   | 1.52E+07 | 0.27 | 471.65  | 3.04 | 0.06 |
| E4 | GPM2 | 1A | AX.89625350   | 1.52E+07 | 0.26 | 473.99  | 3.01 | 0.07 |
| E4 | GPM2 | 1A | AX.89473124   | 1.53E+07 | 0.44 | -477.22 | 3.36 | 0.09 |
| E4 | GPS  | 1A | AX.89678958   | 1.24E+07 | 0.40 | -1.58   | 3.05 | 0.07 |
| E4 | GPM2 | 1A | AX.89486957   | 1.48E+07 | 0.27 | 490.96  | 3.23 | 0.07 |
| E4 | GPM2 | 1A | AX.89495221   | 1.49E+07 | 0.27 | 490.96  | 3.23 | 0.07 |
| E4 | GPM2 | 1A | AX.89537097   | 1.51E+07 | 0.27 | 475.66  | 3.08 | 0.06 |
| E4 | GPS  | 1A | AX.89662264   | 1.47E+07 | 0.39 | 1.69    | 3.91 | 0.06 |
| E4 | GPS  | 1A | AX.89399429   | 1.47E+07 | 0.38 | 1.55    | 3.38 | 0.05 |
| E4 | GPS  | 1A | AX.89467895   | 1.47E+07 | 0.38 | 1.53    | 3.29 | 0.05 |
| E4 | GPS  | 1A | AX.89443156   | 1.47E+07 | 0.39 | 1.46    | 3.08 | 0.05 |
| E4 | GPS  | 1A | AX.89520082   | 1.52E+07 | 0.27 | 1.66    | 3.25 | 0.06 |
| E4 | GPS  | 1A | AX.89714898   | 1.52E+07 | 0.50 | -1.52   | 3.38 | 0.03 |
| E4 | GY   | 1A | X.89740781_OT | 5.84E+08 | 0.09 | 2.63    | 3.18 | 0.02 |
| E4 | GY   | 1A | X.89615284_OT | 5.84E+08 | 0.10 | 2.48    | 3.03 | 0.02 |
| E4 | GY   | 1A | X.89454122_OT | 5.84E+08 | 0.10 | 2.68    | 3.56 | 0.03 |
| E4 | GY   | 1A | X.89569829_OT | 5.84E+08 | 0.10 | 2.50    | 3.07 | 0.03 |
| E4 | SPM2 | 1A | AX.89438882   | 4.06E+08 | 0.43 | -18.06  | 3.36 | 0.06 |
| E4 | TKW  | 1A | AX.89684335   | 1.21E+07 | 0.32 | -0.84   | 3.03 | 0.05 |
| E4 | TKW  | 1A | AX.89607744   | 1.24E+07 | 0.37 | -0.91   | 3.61 | 0.06 |
| E4 | TKW  | 1A | AX.89618389   | 1.24E+07 | 0.42 | 0.80    | 3.09 | 0.03 |
| E4 | TKW  | 1A | AX.89459714   | 5.89E+08 | 0.28 | -0.94   | 3.07 | 0.05 |
| E1 | GY   | 1B | AX.89557668   | 5.75E+08 | 0.09 | -4.33   | 3.64 | 0.06 |
| E1 | GY   | 1B | AX.89402478   | 5.63E+08 | 0.48 | -2.36   | 3.25 | 0.05 |
| E1 | GY   | 1B | AX.89310034   | 5.50E+08 | 0.26 | -3.07   | 4.11 | 0.06 |
| E1 | GY   | 1B | AX.89535186   | 5.72E+08 | 0.11 | -3.78   | 3.32 | 0.05 |
| E1 | GY   | 1B | AX.89531860   | 5.48E+08 | 0.19 | -3.13   | 3.50 | 0.05 |
| E1 | GY   | 1B | AX.89346649   | 5.44E+08 | 0.44 | -2.29   | 3.06 | 0.05 |
| E1 | GY   | 1B | AX.89376997   | 6.14E+08 | 0.18 | -3.08   | 3.24 | 0.05 |
| E1 | GY   | 1B | AX.89518409   | 5.91E+08 | 0.26 | -2.71   | 3.27 | 0.05 |
| E1 | GY   | 1B | AX.89552444   | 5.43E+08 | 0.27 | -3.68   | 5.78 | 0.09 |
| E1 | GY   | 1B | AX.89617894   | 6.14E+08 | 0.20 | -3.19   | 3.67 | 0.06 |
| E1 | GY   | 1B | AX.89537204   | 6.13E+08 | 0.17 | -3.08   | 3.11 | 0.05 |
| E1 | GY   | 1B | AX.89408237   | 6.14E+08 | 0.20 | -3.19   | 3.67 | 0.06 |
| E1 | GY   | 1B | AX.89510480   | 6.14E+08 | 0.20 | -3.16   | 3.67 | 0.06 |
| E1 | GY   | 1B | AX.89679299   | 6.14E+08 | 0.20 | -3.19   | 3.67 | 0.06 |
| E1 | GY   | 1B | AX.89340249   | 6.14E+08 | 0.20 | -3.19   | 3.67 | 0.06 |
| E1 | GY   | 1B | AX.89670926   | 6.14E+08 | 0.20 | -3.19   | 3.67 | 0.06 |
| E1 | GY   | 1B | AX.89586596   | 5.89E+08 | 0.27 | -2.70   | 3.35 | 0.06 |
| E1 | GY   | 1B | AX.89456394   | 6.15E+08 | 0.20 | -3.18   | 3.71 | 0.06 |
| E1 | GY   | 1B | AX.89492642   | 5.73E+08 | 0.08 | -4.44   | 3.50 | 0.05 |
| E1 | GY   | 1B | AX.89345885   | 5.43E+08 | 0.44 | -2.82   | 4.39 | 0.08 |
| E1 | GY   | 1B | AX.89324925   | 5.43E+08 | 0.41 | -2.68   | 3.95 | 0.07 |
| E1 | GY   | 1B | AX.89389412   | 6.14E+08 | 0.19 | -3.01   | 3.23 | 0.05 |
| E1 | GY   | 1B | AX.89428423   | 5.32E+08 | 0.18 | -3.23   | 3.50 | 0.05 |
| E1 | GY   | 1B | AX.89670926   | 6.14E+08 | 0.20 | -3.19   | 3.67 | 0.06 |
| E1 | GY   | 1B | AX.89460697   | 5.62E+08 | 0.17 | -3.59   | 4.14 | 0.06 |
| E1 | GY   | 1B | AX.89463857   | 5.91E+08 | 0.25 | -2.69   | 3.20 | 0.05 |
| E1 | GY   | 1B | AX.89380688   | 5.90E+08 | 0.27 | -2.70   | 3.35 | 0.06 |

|    |    |    |             |          |      |       |      |      |
|----|----|----|-------------|----------|------|-------|------|------|
| E1 | GY | 1B | AX.89518107 | 5.95E+08 | 0.15 | -3.47 | 3.52 | 0.05 |
| E1 | GY | 1B | AX.89414649 | 5.71E+08 | 0.09 | -4.20 | 3.32 | 0.05 |
| E1 | GY | 1B | AX.89310034 | 5.50E+08 | 0.26 | -3.07 | 4.11 | 0.06 |
| E1 | GY | 1B | AX.89343729 | 6.14E+08 | 0.20 | -3.18 | 3.71 | 0.06 |
| E1 | GY | 1B | AX.89324925 | 5.43E+08 | 0.41 | -2.68 | 3.95 | 0.07 |
| E1 | GY | 1B | AX.89449310 | 6.15E+08 | 0.20 | -3.18 | 3.71 | 0.06 |
| E1 | GY | 1B | AX.89693737 | 5.74E+08 | 0.09 | -4.33 | 3.64 | 0.06 |
| E1 | GY | 1B | AX.89470072 | 5.71E+08 | 0.09 | -4.20 | 3.32 | 0.05 |
| E1 | GY | 1B | AX.89457977 | 4.74E+08 | 0.14 | -3.52 | 3.53 | 0.06 |
| E1 | GY | 1B | AX.89322211 | 5.71E+08 | 0.09 | -4.20 | 3.32 | 0.05 |
| E1 | GY | 1B | AX.89520692 | 5.72E+08 | 0.11 | -3.78 | 3.32 | 0.05 |
| E1 | GY | 1B | AX.89518409 | 5.91E+08 | 0.26 | -2.71 | 3.27 | 0.05 |
| E1 | GY | 1B | AX.89605695 | 5.71E+08 | 0.09 | -4.20 | 3.32 | 0.05 |
| E1 | GY | 1B | AX.89310249 | 5.91E+08 | 0.10 | -4.12 | 3.60 | 0.06 |
| E1 | GY | 1B | AX.89693737 | 5.74E+08 | 0.09 | -4.33 | 3.64 | 0.06 |
| E1 | GY | 1B | AX.89531860 | 5.48E+08 | 0.19 | -3.13 | 3.50 | 0.05 |
| E1 | GY | 1B | AX.89526974 | 6.15E+08 | 0.20 | -3.18 | 3.71 | 0.06 |
| E1 | GY | 1B | AX.89614985 | 5.73E+08 | 0.08 | -4.44 | 3.50 | 0.05 |
| E1 | GY | 1B | AX.89663827 | 4.81E+08 | 0.13 | 3.35  | 3.02 | 0.04 |
| E1 | GY | 1B | AX.89663827 | 4.81E+08 | 0.13 | 3.35  | 3.02 | 0.04 |
| E1 | GY | 1B | AX.89415762 | 5.91E+08 | 0.26 | -2.71 | 3.27 | 0.05 |
| E1 | GY | 1B | AX.89310249 | 5.91E+08 | 0.10 | -4.12 | 3.60 | 0.06 |
| E1 | GY | 1B | AX.89564115 | 5.76E+08 | 0.09 | -4.33 | 3.64 | 0.06 |
| E1 | GY | 1B | AX.89424158 | 5.29E+08 | 0.35 | 2.36  | 3.02 | 0.04 |
| E1 | GY | 1B | AX.89402478 | 5.63E+08 | 0.48 | -2.36 | 3.25 | 0.05 |
| E1 | GY | 1B | AX.89336594 | 6.15E+08 | 0.20 | -3.18 | 3.71 | 0.06 |
| E1 | GY | 1B | AX.89584240 | 5.43E+08 | 0.27 | -3.68 | 5.78 | 0.09 |
| E1 | GY | 1B | AX.89506992 | 5.45E+08 | 0.19 | -3.12 | 3.49 | 0.05 |
| E1 | GY | 1B | AX.89401886 | 5.95E+08 | 0.14 | -3.50 | 3.50 | 0.05 |
| E1 | GY | 1B | AX.89461734 | 5.49E+08 | 0.27 | -3.07 | 4.15 | 0.06 |
| E1 | GY | 1B | AX.89541920 | 5.43E+08 | 0.27 | -2.85 | 3.65 | 0.05 |
| E1 | GY | 1B | AX.89376997 | 6.14E+08 | 0.18 | -3.08 | 3.24 | 0.05 |
| E1 | GY | 1B | AX.89374979 | 5.47E+08 | 0.12 | -3.52 | 3.11 | 0.05 |
| E1 | GY | 1B | AX.89346649 | 5.44E+08 | 0.44 | -2.29 | 3.06 | 0.05 |
| E1 | GY | 1B | AX.89507929 | 5.43E+08 | 0.44 | -2.82 | 4.39 | 0.08 |
| E1 | GY | 1B | AX.89449310 | 6.15E+08 | 0.20 | -3.18 | 3.71 | 0.06 |
| E1 | GY | 1B | AX.89373658 | 5.32E+08 | 0.24 | -3.26 | 4.37 | 0.07 |
| E1 | GY | 1B | AX.89347349 | 5.94E+08 | 0.14 | -3.50 | 3.50 | 0.05 |
| E1 | GY | 1B | AX.89520572 | 5.47E+08 | 0.33 | -2.52 | 3.30 | 0.05 |
| E1 | GY | 1B | AX.89539367 | 5.92E+08 | 0.28 | -2.65 | 3.34 | 0.05 |
| E1 | GY | 1B | AX.89340424 | 5.62E+08 | 0.28 | -2.69 | 3.42 | 0.05 |
| E1 | GY | 1B | AX.89614302 | 5.62E+08 | 0.29 | -2.70 | 3.47 | 0.05 |
| E1 | GY | 1B | AX.89344300 | 5.89E+08 | 0.27 | -2.70 | 3.35 | 0.06 |
| E1 | GY | 1B | AX.89336594 | 6.15E+08 | 0.20 | -3.18 | 3.71 | 0.06 |
| E1 | GY | 1B | AX.89526974 | 6.15E+08 | 0.20 | -3.18 | 3.71 | 0.06 |
| E1 | GY | 1B | AX.89336833 | 6.15E+08 | 0.20 | -3.18 | 3.71 | 0.06 |
| E1 | GY | 1B | AX.89510021 | 5.73E+08 | 0.08 | -4.44 | 3.50 | 0.05 |
| E1 | GY | 1B | AX.89725397 | 5.63E+08 | 0.48 | -2.36 | 3.25 | 0.05 |
| E1 | GY | 1B | AX.89505604 | 5.92E+08 | 0.26 | -2.71 | 3.27 | 0.05 |
| E1 | GY | 1B | AX.89401180 | 5.71E+08 | 0.09 | -4.20 | 3.32 | 0.05 |

|    |      |    |             |          |      |        |      |      |
|----|------|----|-------------|----------|------|--------|------|------|
| E1 | GY   | 1B | AX.89401180 | 5.71E+08 | 0.09 | -4.20  | 3.32 | 0.05 |
| E1 | GY   | 1B | AX.89380569 | 5.92E+08 | 0.26 | -2.71  | 3.27 | 0.05 |
| E1 | GY   | 1B | AX.89530956 | 5.43E+08 | 0.44 | -2.82  | 4.39 | 0.08 |
| E1 | GY   | 1B | AX.89604422 | 5.91E+08 | 0.25 | -2.69  | 3.20 | 0.05 |
| E1 | GY   | 1B | AX.89361588 | 5.48E+08 | 0.19 | -3.13  | 3.50 | 0.05 |
| E1 | GY   | 1B | AX.89515088 | 5.92E+08 | 0.26 | -2.71  | 3.27 | 0.05 |
| E1 | SPM2 | 1B | AX.89606726 | 4.45E+07 | 0.44 | -19.00 | 3.92 | 0.07 |
| E1 | GY   | 1B | AX.89383273 | 5.91E+08 | 0.25 | -2.69  | 3.20 | 0.05 |
| E1 | GY   | 1B | AX.89531457 | 6.14E+08 | 0.20 | -3.18  | 3.71 | 0.06 |
| E1 | GY   | 1B | AX.89361803 | 5.63E+08 | 0.48 | -2.36  | 3.25 | 0.05 |
| E1 | GY   | 1B | AX.89397437 | 5.93E+08 | 0.13 | -3.89  | 4.01 | 0.06 |
| E1 | GY   | 1B | AX.89346018 | 5.92E+08 | 0.28 | -2.65  | 3.34 | 0.05 |
| E1 | GY   | 1B | AX.89498745 | 5.76E+08 | 0.09 | -4.33  | 3.64 | 0.06 |
| E1 | GY   | 1B | AX.89381273 | 6.15E+08 | 0.20 | -3.18  | 3.71 | 0.06 |
| E1 | GY   | 1B | AX.89491706 | 5.64E+08 | 0.12 | -3.79  | 3.53 | 0.05 |
| E1 | GY   | 1B | AX.89491706 | 5.64E+08 | 0.12 | -3.79  | 3.53 | 0.05 |
| E1 | GY   | 1B | AX.89392454 | 5.95E+08 | 0.14 | -3.50  | 3.50 | 0.05 |
| E1 | GY   | 1B | AX.89534408 | 5.71E+08 | 0.09 | -4.20  | 3.32 | 0.05 |
| E1 | GY   | 1B | AX.89743822 | 5.48E+08 | 0.19 | -3.13  | 3.50 | 0.05 |
| E1 | GY   | 1B | AX.89572193 | 5.72E+08 | 0.09 | -4.20  | 3.32 | 0.05 |
| E1 | GY   | 1B | AX.89339341 | 4.30E+08 | 0.39 | 2.57   | 3.60 | 0.07 |
| E1 | GY   | 1B | AX.89588573 | 5.91E+08 | 0.25 | -2.69  | 3.20 | 0.05 |
| E1 | GY   | 1B | AX.89414649 | 5.71E+08 | 0.09 | -4.20  | 3.32 | 0.05 |
| E1 | GY   | 1B | AX.89456394 | 6.15E+08 | 0.20 | -3.18  | 3.71 | 0.06 |
| E1 | GY   | 1B | AX.89504198 | 6.14E+08 | 0.19 | -2.97  | 3.21 | 0.05 |
| E1 | GY   | 1B | AX.89399318 | 5.95E+08 | 0.15 | -3.72  | 3.98 | 0.06 |
| E1 | GY   | 1B | AX.89339603 | 6.13E+08 | 0.14 | -3.73  | 3.91 | 0.06 |
| E1 | GY   | 1B | AX.89317797 | 5.95E+08 | 0.14 | -3.50  | 3.50 | 0.05 |
| E1 | GY   | 1B | AX.89317797 | 5.95E+08 | 0.14 | -3.50  | 3.50 | 0.05 |
| E1 | GY   | 1B | AX.89484632 | 5.73E+08 | 0.09 | -4.93  | 4.38 | 0.07 |
| E1 | GY   | 1B | AX.89671300 | 5.43E+08 | 0.46 | -2.72  | 4.15 | 0.08 |
| E1 | GY   | 1B | AX.89621777 | 5.43E+08 | 0.43 | -2.62  | 3.84 | 0.07 |
| E1 | GY   | 1B | AX.89609372 | 5.73E+08 | 0.08 | -4.44  | 3.50 | 0.05 |
| E1 | GY   | 1B | AX.89614302 | 5.62E+08 | 0.29 | -2.70  | 3.47 | 0.05 |
| E1 | GY   | 1B | AX.89460697 | 5.62E+08 | 0.17 | -3.59  | 4.14 | 0.06 |
| E1 | GY   | 1B | AX.89721599 | 5.94E+08 | 0.15 | -3.72  | 3.98 | 0.06 |
| E1 | GY   | 1B | AX.89347943 | 5.46E+08 | 0.33 | -2.57  | 3.42 | 0.05 |
| E1 | GY   | 1B | AX.89446794 | 5.50E+08 | 0.27 | -2.77  | 3.54 | 0.05 |
| E1 | GY   | 1B | AX.89457977 | 4.74E+08 | 0.14 | -3.52  | 3.53 | 0.06 |
| E1 | GY   | 1B | AX.89635557 | 5.32E+08 | 0.20 | -3.18  | 3.65 | 0.06 |
| E1 | GY   | 1B | AX.89635557 | 5.32E+08 | 0.20 | -3.18  | 3.65 | 0.06 |
| E1 | GY   | 1B | AX.89587950 | 5.92E+08 | 0.26 | -2.71  | 3.27 | 0.05 |
| E1 | GY   | 1B | AX.89564115 | 5.76E+08 | 0.09 | -4.33  | 3.64 | 0.06 |
| E1 | GY   | 1B | AX.89466319 | 5.71E+08 | 0.11 | -3.78  | 3.32 | 0.05 |
| E1 | GY   | 1B | AX.89564492 | 5.71E+08 | 0.09 | -4.20  | 3.32 | 0.05 |
| E1 | GY   | 1B | AX.89466421 | 5.91E+08 | 0.26 | -2.70  | 3.25 | 0.05 |
| E1 | GY   | 1B | AX.89644425 | 5.71E+08 | 0.09 | -4.20  | 3.32 | 0.05 |
| E1 | GY   | 1B | AX.89397557 | 5.94E+08 | 0.15 | -3.69  | 4.00 | 0.06 |
| E1 | GY   | 1B | AX.89342515 | 6.14E+08 | 0.20 | -3.19  | 3.67 | 0.06 |
| E1 | GY   | 1B | AX.89498745 | 5.76E+08 | 0.09 | -4.33  | 3.64 | 0.06 |

|    |      |    |             |          |      |       |      |      |
|----|------|----|-------------|----------|------|-------|------|------|
| E1 | GY   | 1B | AX.89412705 | 5.95E+08 | 0.15 | -3.72 | 3.98 | 0.06 |
| E1 | GY   | 1B | AX.89715167 | 5.76E+08 | 0.20 | -3.14 | 3.63 | 0.06 |
| E1 | GY   | 1B | AX.89589298 | 5.95E+08 | 0.15 | -3.72 | 3.98 | 0.06 |
| E1 | GY   | 1B | AX.89541910 | 5.53E+08 | 0.06 | -5.22 | 3.57 | 0.06 |
| E1 | GY   | 1B | AX.89389412 | 6.14E+08 | 0.19 | -3.01 | 3.23 | 0.05 |
| E1 | GY   | 1B | AX.89374979 | 5.47E+08 | 0.12 | -3.52 | 3.11 | 0.05 |
| E1 | GY   | 1B | AX.89414699 | 5.95E+08 | 0.15 | -3.69 | 4.00 | 0.06 |
| E1 | GY   | 1B | AX.89528405 | 5.89E+08 | 0.12 | -4.11 | 4.06 | 0.08 |
| E1 | GY   | 1B | AX.89485879 | 6.15E+08 | 0.20 | -3.18 | 3.71 | 0.06 |
| E1 | GY   | 1B | AX.89426148 | 5.50E+08 | 0.29 | -2.67 | 3.41 | 0.05 |
| E1 | GY   | 1B | AX.89426148 | 5.50E+08 | 0.29 | -2.67 | 3.41 | 0.05 |
| E1 | GY   | 1B | AX.89562690 | 5.73E+08 | 0.08 | -4.58 | 3.53 | 0.06 |
| E1 | GY   | 1B | AX.89524937 | 6.13E+08 | 0.14 | -3.73 | 3.91 | 0.06 |
| E1 | GY   | 1B | AX.89621777 | 5.43E+08 | 0.43 | -2.62 | 3.84 | 0.07 |
| E1 | GY   | 1B | AX.89573650 | 6.15E+08 | 0.20 | -3.18 | 3.71 | 0.06 |
| E1 | GY   | 1B | AX.89472916 | 4.29E+08 | 0.39 | 2.57  | 3.60 | 0.07 |
| E1 | GY   | 1B | AX.89415540 | 5.90E+08 | 0.27 | -2.70 | 3.35 | 0.06 |
| E1 | GY   | 1B | AX.89574388 | 5.62E+08 | 0.17 | -3.62 | 4.12 | 0.06 |
| E1 | GY   | 1B | AX.89614985 | 5.73E+08 | 0.08 | -4.44 | 3.50 | 0.05 |
| E1 | GY   | 1B | AX.89676422 | 5.65E+08 | 0.14 | -3.60 | 3.59 | 0.06 |
| E1 | GY   | 1B | AX.89461734 | 5.49E+08 | 0.27 | -3.07 | 4.15 | 0.06 |
| E1 | GY   | 1B | AX.89428423 | 5.32E+08 | 0.18 | -3.23 | 3.50 | 0.05 |
| E1 | SPM2 | 1B | AX.89645430 | 4.14E+07 | 0.10 | 29.82 | 3.64 | 0.07 |
| E1 | GY   | 1B | AX.89392454 | 5.95E+08 | 0.14 | -3.50 | 3.50 | 0.05 |
| E1 | GY   | 1B | AX.89342243 | 6.15E+08 | 0.20 | -3.18 | 3.71 | 0.06 |
| E1 | GY   | 1B | AX.89405354 | 5.28E+08 | 0.35 | 2.36  | 3.02 | 0.04 |
| E1 | GY   | 1B | AX.89346018 | 5.92E+08 | 0.28 | -2.65 | 3.34 | 0.05 |
| E1 | GY   | 1B | AX.89459113 | 5.63E+08 | 0.48 | -2.36 | 3.25 | 0.05 |
| E1 | GY   | 1B | AX.89459113 | 5.63E+08 | 0.48 | -2.36 | 3.25 | 0.05 |
| E1 | GY   | 1B | AX.89484632 | 5.73E+08 | 0.09 | -4.93 | 4.38 | 0.07 |
| E1 | GY   | 1B | AX.89715167 | 5.76E+08 | 0.20 | -3.14 | 3.63 | 0.06 |
| E1 | GY   | 1B | AX.89616764 | 6.14E+08 | 0.20 | -3.19 | 3.67 | 0.06 |
| E1 | GY   | 1B | AX.89346098 | 5.62E+08 | 0.17 | -3.59 | 4.14 | 0.06 |
| E1 | GY   | 1B | AX.89346098 | 5.62E+08 | 0.17 | -3.59 | 4.14 | 0.06 |
| E1 | GY   | 1B | AX.89452054 | 6.15E+08 | 0.20 | -3.19 | 3.67 | 0.06 |
| E1 | GY   | 1B | AX.89452054 | 6.15E+08 | 0.20 | -3.19 | 3.67 | 0.06 |
| E1 | GY   | 1B | AX.89334781 | 5.96E+08 | 0.15 | -3.72 | 3.98 | 0.06 |
| E1 | GY   | 1B | AX.89541910 | 5.53E+08 | 0.06 | -5.22 | 3.57 | 0.06 |
| E1 | GY   | 1B | AX.89495626 | 5.48E+08 | 0.19 | -3.13 | 3.50 | 0.05 |
| E1 | GY   | 1B | AX.89561467 | 5.48E+08 | 0.20 | -3.03 | 3.36 | 0.05 |
| E1 | GY   | 1B | AX.89534408 | 5.71E+08 | 0.09 | -4.20 | 3.32 | 0.05 |
| E1 | GY   | 1B | AX.89690662 | 5.94E+08 | 0.15 | -3.47 | 3.52 | 0.05 |
| E1 | GY   | 1B | AX.89339341 | 4.30E+08 | 0.39 | 2.57  | 3.60 | 0.07 |
| E1 | GY   | 1B | AX.89496313 | 6.14E+08 | 0.20 | -3.18 | 3.71 | 0.06 |
| E1 | GY   | 1B | AX.89309966 | 5.48E+08 | 0.19 | -3.13 | 3.50 | 0.05 |
| E1 | GY   | 1B | AX.89678864 | 5.43E+08 | 0.44 | -2.82 | 4.39 | 0.08 |
| E1 | GY   | 1B | AX.89678864 | 5.43E+08 | 0.44 | -2.82 | 4.39 | 0.08 |
| E1 | GY   | 1B | AX.89355593 | 5.89E+08 | 0.27 | -2.70 | 3.35 | 0.06 |
| E1 | GY   | 1B | AX.89322211 | 5.71E+08 | 0.09 | -4.20 | 3.32 | 0.05 |
| E1 | GY   | 1B | AX.89395127 | 6.54E+08 | 0.12 | -3.88 | 3.58 | 0.07 |

|    |    |    |             |          |      |       |      |      |
|----|----|----|-------------|----------|------|-------|------|------|
| E1 | GY | 1B | AX.89667223 | 6.14E+08 | 0.20 | -3.19 | 3.67 | 0.06 |
| E1 | GY | 1B | AX.89765386 | 5.44E+08 | 0.44 | -2.33 | 3.16 | 0.05 |
| E1 | GY | 1B | AX.89442364 | 5.48E+08 | 0.19 | -3.13 | 3.50 | 0.05 |
| E1 | GY | 1B | AX.89486405 | 5.94E+08 | 0.15 | -3.72 | 3.98 | 0.06 |
| E1 | GY | 1B | AX.89637878 | 5.89E+08 | 0.27 | -2.70 | 3.35 | 0.06 |
| E1 | GY | 1B | AX.89355729 | 5.94E+08 | 0.15 | -3.47 | 3.52 | 0.05 |
| E1 | GY | 1B | AX.89536084 | 5.46E+08 | 0.33 | -2.57 | 3.42 | 0.05 |
| E1 | GY | 1B | AX.89314421 | 5.92E+08 | 0.26 | -2.71 | 3.27 | 0.05 |
| E1 | GY | 1B | AX.89415657 | 6.32E+08 | 0.07 | -6.66 | 5.82 | 0.10 |
| E1 | GY | 1B | AX.89415657 | 6.32E+08 | 0.07 | -6.66 | 5.82 | 0.10 |
| E1 | GY | 1B | AX.89336833 | 6.15E+08 | 0.20 | -3.18 | 3.71 | 0.06 |
| E1 | GY | 1B | AX.89465165 | 5.49E+08 | 0.27 | -3.07 | 4.15 | 0.06 |
| E1 | GY | 1B | AX.89360777 | 6.14E+08 | 0.20 | -3.19 | 3.67 | 0.06 |
| E1 | GY | 1B | AX.89536555 | 6.15E+08 | 0.20 | -3.18 | 3.71 | 0.06 |
| E1 | GY | 1B | AX.89454580 | 6.14E+08 | 0.20 | -3.14 | 3.68 | 0.06 |
| E1 | GY | 1B | AX.89655981 | 5.75E+08 | 0.09 | -4.33 | 3.64 | 0.06 |
| E1 | GY | 1B | AX.89655981 | 5.75E+08 | 0.09 | -4.33 | 3.64 | 0.06 |
| E1 | GY | 1B | AX.89409179 | 4.73E+08 | 0.14 | -3.52 | 3.53 | 0.06 |
| E1 | GY | 1B | AX.89409179 | 4.73E+08 | 0.14 | -3.52 | 3.53 | 0.06 |
| E1 | GY | 1B | AX.89361355 | 4.72E+08 | 0.14 | -3.56 | 3.51 | 0.06 |
| E1 | GY | 1B | AX.89349463 | 5.48E+08 | 0.19 | -3.13 | 3.50 | 0.05 |
| E1 | GY | 1B | AX.89583789 | 5.71E+08 | 0.09 | -4.20 | 3.32 | 0.05 |
| E1 | GY | 1B | AX.89432897 | 6.13E+08 | 0.15 | -3.60 | 3.75 | 0.06 |
| E1 | GY | 1B | AX.89432897 | 6.13E+08 | 0.15 | -3.60 | 3.75 | 0.06 |
| E1 | GY | 1B | AX.89648440 | 5.71E+08 | 0.09 | -4.20 | 3.32 | 0.05 |
| E1 | GY | 1B | AX.89771478 | 6.16E+08 | 0.20 | -3.18 | 3.71 | 0.06 |
| E1 | GY | 1B | AX.89361803 | 5.63E+08 | 0.48 | -2.36 | 3.25 | 0.05 |
| E1 | GY | 1B | AX.89584240 | 5.43E+08 | 0.27 | -3.68 | 5.78 | 0.09 |
| E1 | GY | 1B | AX.89381080 | 5.62E+08 | 0.16 | -3.68 | 4.17 | 0.07 |
| E1 | GY | 1B | AX.89506992 | 5.45E+08 | 0.19 | -3.12 | 3.49 | 0.05 |
| E1 | GY | 1B | AX.89479897 | 5.96E+08 | 0.15 | -3.72 | 3.98 | 0.06 |
| E1 | GY | 1B | AX.89609372 | 5.73E+08 | 0.08 | -4.44 | 3.50 | 0.05 |
| E1 | GY | 1B | AX.89317078 | 6.14E+08 | 0.20 | -3.19 | 3.67 | 0.06 |
| E1 | GY | 1B | AX.89338664 | 5.62E+08 | 0.28 | -2.82 | 3.69 | 0.05 |
| E1 | GY | 1B | AX.89421570 | 6.14E+08 | 0.16 | -3.17 | 3.22 | 0.05 |
| E1 | GY | 1B | AX.89754639 | 5.95E+08 | 0.14 | -3.50 | 3.50 | 0.05 |
| E1 | GY | 1B | AX.89656283 | 5.32E+08 | 0.24 | -3.26 | 4.37 | 0.07 |
| E1 | GY | 1B | AX.89656283 | 5.32E+08 | 0.24 | -3.26 | 4.37 | 0.07 |
| E1 | GY | 1B | AX.89430295 | 6.54E+08 | 0.13 | -3.54 | 3.23 | 0.06 |
| E1 | GY | 1B | AX.89328659 | 4.73E+08 | 0.15 | -3.39 | 3.39 | 0.06 |
| E1 | GY | 1B | AX.89492642 | 5.73E+08 | 0.08 | -4.44 | 3.50 | 0.05 |
| E1 | GY | 1B | AX.86161856 | 5.72E+08 | 0.11 | -3.85 | 3.31 | 0.05 |
| E1 | GY | 1B | AX.89550273 | 5.94E+08 | 0.15 | -3.69 | 4.00 | 0.06 |
| E1 | GY | 1B | AX.89562690 | 5.73E+08 | 0.08 | -4.58 | 3.53 | 0.06 |
| E1 | GY | 1B | AX.89468862 | 6.14E+08 | 0.13 | -3.53 | 3.39 | 0.05 |
| E1 | GY | 1B | AX.89468862 | 6.14E+08 | 0.13 | -3.53 | 3.39 | 0.05 |
| E1 | GY | 1B | AX.89563144 | 5.72E+08 | 0.11 | -3.78 | 3.32 | 0.05 |
| E1 | GY | 1B | AX.89421818 | 4.72E+08 | 0.14 | -3.56 | 3.51 | 0.06 |
| E1 | GY | 1B | AX.89586596 | 5.89E+08 | 0.27 | -2.70 | 3.35 | 0.06 |
| E1 | GY | 1B | AX.89412388 | 5.48E+08 | 0.19 | -3.13 | 3.50 | 0.05 |



|    |    |    |             |          |      |       |      |      |
|----|----|----|-------------|----------|------|-------|------|------|
| E1 | GY | 1B | AX.89697293 | 5.47E+08 | 0.33 | -2.50 | 3.24 | 0.05 |
| E1 | GY | 1B | AX.89722018 | 5.90E+08 | 0.27 | -2.80 | 3.54 | 0.06 |
| E1 | GY | 1B | AX.89745504 | 6.14E+08 | 0.20 | -3.18 | 3.71 | 0.06 |
| E1 | GY | 1B | AX.89518107 | 5.95E+08 | 0.15 | -3.47 | 3.52 | 0.05 |
| E1 | GY | 1B | AX.89587635 | 6.16E+08 | 0.20 | -3.18 | 3.71 | 0.06 |
| E1 | GY | 1B | AX.89341296 | 6.54E+08 | 0.14 | -3.31 | 3.11 | 0.06 |
| E1 | GY | 1B | AX.89659812 | 5.94E+08 | 0.15 | -3.47 | 3.52 | 0.05 |
| E1 | GY | 1B | AX.89466319 | 5.71E+08 | 0.11 | -3.78 | 3.32 | 0.05 |
| E1 | GY | 1B | AX.89564492 | 5.71E+08 | 0.09 | -4.20 | 3.32 | 0.05 |
| E1 | GY | 1B | AX.89342243 | 6.15E+08 | 0.20 | -3.18 | 3.71 | 0.06 |
| E1 | GY | 1B | AX.89485001 | 5.95E+08 | 0.15 | -3.72 | 3.98 | 0.06 |
| E1 | GY | 1B | AX.89485001 | 5.95E+08 | 0.15 | -3.72 | 3.98 | 0.06 |
| E1 | GY | 1B | AX.89735423 | 6.15E+08 | 0.20 | -3.18 | 3.71 | 0.06 |
| E1 | GY | 1B | AX.89530956 | 5.43E+08 | 0.44 | -2.82 | 4.39 | 0.08 |
| E1 | GY | 1B | AX.89605695 | 5.71E+08 | 0.09 | -4.20 | 3.32 | 0.05 |
| E1 | GY | 1B | AX.89735505 | 5.50E+08 | 0.26 | -2.95 | 3.80 | 0.06 |
| E1 | GY | 1B | AX.89402330 | 5.93E+08 | 0.13 | -3.89 | 4.01 | 0.06 |
| E1 | GY | 1B | AX.89471727 | 6.16E+08 | 0.20 | -3.18 | 3.71 | 0.06 |
| E1 | GY | 1B | AX.89720333 | 5.44E+08 | 0.45 | -2.36 | 3.23 | 0.05 |
| E1 | GY | 1B | AX.89528229 | 6.15E+08 | 0.20 | -3.18 | 3.71 | 0.06 |
| E1 | GY | 1B | AX.89699324 | 5.64E+08 | 0.11 | -3.58 | 3.03 | 0.05 |
| E1 | GY | 1B | AX.89686897 | 4.30E+08 | 0.39 | 2.58  | 3.65 | 0.07 |
| E1 | GY | 1B | AX.89590119 | 5.63E+08 | 0.12 | -3.53 | 3.04 | 0.05 |
| E1 | GY | 1B | AX.89602399 | 5.72E+08 | 0.09 | -4.20 | 3.32 | 0.05 |
| E1 | GY | 1B | AX.89520284 | 5.76E+08 | 0.09 | -4.33 | 3.64 | 0.06 |
| E1 | GY | 1B | AX.89343729 | 6.14E+08 | 0.20 | -3.18 | 3.71 | 0.06 |
| E1 | GY | 1B | AX.89310110 | 5.71E+08 | 0.11 | -3.78 | 3.32 | 0.05 |
| E1 | GY | 1B | AX.89355593 | 5.89E+08 | 0.27 | -2.70 | 3.35 | 0.06 |
| E1 | GY | 1B | AX.89558501 | 5.73E+08 | 0.08 | -4.80 | 3.83 | 0.06 |
| E1 | GY | 1B | AX.89671300 | 5.43E+08 | 0.46 | -2.72 | 4.15 | 0.08 |
| E1 | GY | 1B | AX.89590842 | 6.15E+08 | 0.20 | -3.18 | 3.71 | 0.06 |
| E1 | GY | 1B | AX.89310641 | 5.48E+08 | 0.19 | -3.13 | 3.50 | 0.05 |
| E1 | GY | 1B | AX.89344300 | 5.89E+08 | 0.27 | -2.70 | 3.35 | 0.06 |
| E1 | GY | 1B | AX.89472916 | 4.29E+08 | 0.39 | 2.57  | 3.60 | 0.07 |
| E1 | GY | 1B | AX.89379733 | 5.72E+08 | 0.09 | -4.20 | 3.32 | 0.05 |
| E1 | GY | 1B | AX.89379733 | 5.72E+08 | 0.09 | -4.20 | 3.32 | 0.05 |
| E1 | GY | 1B | AX.89580727 | 5.96E+08 | 0.15 | -3.72 | 3.98 | 0.06 |
| E1 | GY | 1B | AX.89415540 | 5.90E+08 | 0.27 | -2.70 | 3.35 | 0.06 |
| E1 | GY | 1B | AX.89574388 | 5.62E+08 | 0.17 | -3.62 | 4.12 | 0.06 |
| E1 | GY | 1B | AX.89344807 | 6.16E+08 | 0.20 | -3.18 | 3.71 | 0.06 |
| E1 | GY | 1B | AX.89509761 | 5.43E+08 | 0.41 | -2.57 | 3.68 | 0.06 |
| E1 | GY | 1B | AX.89591657 | 5.72E+08 | 0.09 | -4.20 | 3.32 | 0.05 |
| E1 | GY | 1B | AX.89450987 | 5.71E+08 | 0.09 | -4.20 | 3.32 | 0.05 |
| E1 | GY | 1B | AX.89450987 | 5.71E+08 | 0.09 | -4.20 | 3.32 | 0.05 |
| E1 | GY | 1B | AX.89404365 | 5.89E+08 | 0.27 | -2.69 | 3.30 | 0.06 |
| E1 | GY | 1B | AX.89404365 | 5.89E+08 | 0.27 | -2.69 | 3.30 | 0.06 |
| E1 | GY | 1B | AX.89587950 | 5.92E+08 | 0.26 | -2.71 | 3.27 | 0.05 |
| E1 | GY | 1B | AX.89380569 | 5.92E+08 | 0.26 | -2.71 | 3.27 | 0.05 |
| E1 | GY | 1B | AX.89627315 | 5.73E+08 | 0.08 | -4.44 | 3.50 | 0.05 |
| E1 | GY | 1B | AX.89604422 | 5.91E+08 | 0.25 | -2.69 | 3.20 | 0.05 |

|    |    |    |             |          |      |       |      |      |
|----|----|----|-------------|----------|------|-------|------|------|
| E1 | GY | 1B | AX.89428761 | 5.44E+08 | 0.45 | -2.36 | 3.23 | 0.05 |
| E1 | GY | 1B | AX.89357199 | 5.94E+08 | 0.15 | -3.47 | 3.52 | 0.05 |
| E1 | GY | 1B | AX.89334216 | 5.76E+08 | 0.09 | -4.33 | 3.64 | 0.06 |
| E1 | GY | 1B | AX.89588573 | 5.91E+08 | 0.25 | -2.69 | 3.20 | 0.05 |
| E1 | GY | 1B | AX.89357479 | 5.43E+08 | 0.45 | -2.57 | 3.73 | 0.06 |
| E1 | GY | 1B | AX.89345885 | 5.43E+08 | 0.44 | -2.82 | 4.39 | 0.08 |
| E1 | GY | 1B | AX.89488197 | 5.94E+08 | 0.15 | -3.69 | 4.00 | 0.06 |
| E1 | GY | 1B | AX.89605272 | 6.16E+08 | 0.20 | -3.18 | 3.71 | 0.06 |
| E1 | GY | 1B | AX.89653613 | 5.44E+08 | 0.44 | -2.45 | 3.44 | 0.06 |
| E1 | GY | 1B | AX.89541920 | 5.43E+08 | 0.27 | -2.85 | 3.65 | 0.05 |
| E1 | GY | 1B | AX.89463084 | 6.14E+08 | 0.20 | -3.19 | 3.67 | 0.06 |
| E1 | GY | 1B | AX.89381566 | 5.73E+08 | 0.09 | -4.93 | 4.38 | 0.07 |
| E1 | GY | 1B | AX.89381776 | 4.29E+08 | 0.39 | 2.57  | 3.60 | 0.07 |
| E1 | GY | 1B | AX.89580989 | 6.46E+08 | 0.07 | -4.89 | 3.58 | 0.06 |
| E1 | GY | 1B | AX.89629310 | 6.14E+08 | 0.19 | -3.07 | 3.39 | 0.05 |
| E1 | GY | 1B | AX.89441819 | 5.89E+08 | 0.27 | -2.70 | 3.35 | 0.06 |
| E1 | GY | 1B | AX.89524464 | 5.89E+08 | 0.27 | -2.70 | 3.35 | 0.06 |
| E1 | GY | 1B | AX.89347349 | 5.94E+08 | 0.14 | -3.50 | 3.50 | 0.05 |
| E1 | GY | 1B | AX.89395127 | 6.54E+08 | 0.12 | -3.88 | 3.58 | 0.07 |
| E1 | GY | 1B | AX.89359791 | 5.32E+08 | 0.22 | -3.29 | 4.16 | 0.06 |
| E1 | GY | 1B | AX.89524937 | 6.13E+08 | 0.14 | -3.73 | 3.91 | 0.06 |
| E1 | GY | 1B | AX.89667223 | 6.14E+08 | 0.20 | -3.19 | 3.67 | 0.06 |
| E1 | GY | 1B | AX.89581957 | 5.95E+08 | 0.15 | -3.72 | 3.98 | 0.06 |
| E1 | GY | 1B | AX.89765386 | 5.44E+08 | 0.44 | -2.33 | 3.16 | 0.05 |
| E1 | GY | 1B | AX.89442364 | 5.48E+08 | 0.19 | -3.13 | 3.50 | 0.05 |
| E1 | GY | 1B | AX.89431355 | 6.14E+08 | 0.20 | -3.19 | 3.67 | 0.06 |
| E1 | GY | 1B | AX.89460853 | 5.92E+08 | 0.26 | -2.71 | 3.27 | 0.05 |
| E1 | GY | 1B | AX.89536040 | 4.73E+08 | 0.14 | -3.52 | 3.53 | 0.06 |
| E1 | GY | 1B | AX.89347943 | 5.46E+08 | 0.33 | -2.57 | 3.42 | 0.05 |
| E1 | GY | 1B | AX.89765882 | 6.46E+08 | 0.07 | -4.89 | 3.58 | 0.06 |
| E1 | GY | 1B | AX.89477534 | 5.62E+08 | 0.28 | -2.83 | 3.73 | 0.06 |
| E1 | GY | 1B | AX.89391459 | 4.82E+08 | 0.13 | 3.35  | 3.02 | 0.04 |
| E1 | GY | 1B | AX.89513960 | 6.13E+08 | 0.16 | -3.17 | 3.22 | 0.05 |
| E1 | GY | 1B | AX.89383273 | 5.91E+08 | 0.25 | -2.69 | 3.20 | 0.05 |
| E1 | GY | 1B | AX.89383439 | 6.14E+08 | 0.20 | -3.19 | 3.67 | 0.06 |
| E1 | GY | 1B | AX.89536494 | 5.47E+08 | 0.19 | -3.13 | 3.50 | 0.05 |
| E1 | GY | 1B | AX.89360777 | 6.14E+08 | 0.20 | -3.19 | 3.67 | 0.06 |
| E1 | GY | 1B | AX.89315126 | 5.91E+08 | 0.25 | -2.69 | 3.20 | 0.05 |
| E1 | GY | 1B | AX.89384148 | 5.76E+08 | 0.09 | -4.33 | 3.64 | 0.06 |
| E1 | GY | 1B | AX.89443701 | 6.15E+08 | 0.20 | -3.18 | 3.71 | 0.06 |
| E1 | GY | 1B | AX.89432547 | 5.73E+08 | 0.08 | -4.44 | 3.50 | 0.05 |
| E1 | GY | 1B | AX.89454719 | 5.91E+08 | 0.10 | -4.12 | 3.60 | 0.06 |
| E1 | GY | 1B | AX.89596159 | 5.90E+08 | 0.26 | -2.63 | 3.14 | 0.05 |
| E1 | GY | 1B | AX.89315865 | 5.71E+08 | 0.09 | -4.20 | 3.32 | 0.05 |
| E1 | GY | 1B | AX.89596373 | 5.62E+08 | 0.28 | -2.83 | 3.73 | 0.06 |
| E1 | GY | 1B | AX.89515088 | 5.92E+08 | 0.26 | -2.71 | 3.27 | 0.05 |
| E1 | GY | 1B | AX.89380858 | 5.94E+08 | 0.15 | -3.69 | 4.00 | 0.06 |
| E1 | GY | 1B | AX.89466421 | 5.91E+08 | 0.26 | -2.70 | 3.25 | 0.05 |
| E1 | GY | 1B | AX.89502838 | 6.15E+08 | 0.20 | -3.18 | 3.71 | 0.06 |
| E1 | GY | 1B | AX.89502838 | 6.15E+08 | 0.20 | -3.18 | 3.71 | 0.06 |

|    |    |    |             |          |      |       |      |      |
|----|----|----|-------------|----------|------|-------|------|------|
| E1 | GY | 1B | AX.89702421 | 5.91E+08 | 0.25 | -2.69 | 3.20 | 0.05 |
| E1 | GY | 1B | AX.89397437 | 5.93E+08 | 0.13 | -3.89 | 4.01 | 0.06 |
| E1 | GY | 1B | AX.89488197 | 5.94E+08 | 0.15 | -3.69 | 4.00 | 0.06 |
| E1 | GY | 1B | AX.89657292 | 5.94E+08 | 0.13 | -3.37 | 3.05 | 0.05 |
| E1 | GY | 1B | AX.89657292 | 5.94E+08 | 0.13 | -3.37 | 3.05 | 0.05 |
| E1 | GY | 1B | AX.89706711 | 6.15E+08 | 0.20 | -3.18 | 3.71 | 0.06 |
| E1 | GY | 1B | AX.89374635 | 5.43E+08 | 0.43 | -2.62 | 3.84 | 0.07 |
| E1 | GY | 1B | AX.89374635 | 5.43E+08 | 0.43 | -2.62 | 3.84 | 0.07 |
| E1 | GY | 1B | AX.89754639 | 5.95E+08 | 0.14 | -3.50 | 3.50 | 0.05 |
| E1 | GY | 1B | AX.89743822 | 5.48E+08 | 0.19 | -3.13 | 3.50 | 0.05 |
| E1 | GY | 1B | AX.89492307 | 5.75E+08 | 0.09 | -4.33 | 3.64 | 0.06 |
| E1 | GY | 1B | AX.89328659 | 4.73E+08 | 0.15 | -3.39 | 3.39 | 0.06 |
| E1 | GY | 1B | AX.89434131 | 5.73E+08 | 0.08 | -4.44 | 3.50 | 0.05 |
| E1 | GY | 1B | AX.89670540 | 5.71E+08 | 0.09 | -4.20 | 3.32 | 0.05 |
| E1 | GY | 1B | AX.89512987 | 5.71E+08 | 0.09 | -4.20 | 3.32 | 0.05 |
| E1 | GY | 1B | AX.89708163 | 5.48E+08 | 0.19 | -3.13 | 3.50 | 0.05 |
| E1 | GY | 1B | AX.89539367 | 5.92E+08 | 0.28 | -2.65 | 3.34 | 0.05 |
| E1 | GY | 1B | AX.89634659 | 6.15E+08 | 0.20 | -3.18 | 3.71 | 0.06 |
| E1 | GY | 1B | AX.89675930 | 5.71E+08 | 0.09 | -4.20 | 3.32 | 0.05 |
| E1 | GY | 1B | AX.89675930 | 5.71E+08 | 0.09 | -4.20 | 3.32 | 0.05 |
| E1 | GY | 1B | AX.89769760 | 6.15E+08 | 0.20 | -3.18 | 3.71 | 0.06 |
| E1 | GY | 1B | AX.89387161 | 5.48E+08 | 0.19 | -3.13 | 3.50 | 0.05 |
| E1 | GY | 1B | AX.89446794 | 5.50E+08 | 0.27 | -2.77 | 3.54 | 0.05 |
| E1 | GY | 1B | AX.89622537 | 5.71E+08 | 0.11 | -3.78 | 3.32 | 0.05 |
| E1 | GY | 1B | AX.89622537 | 5.71E+08 | 0.11 | -3.78 | 3.32 | 0.05 |
| E1 | GY | 1B | AX.89412705 | 5.95E+08 | 0.15 | -3.72 | 3.98 | 0.06 |
| E1 | GY | 1B | AX.89745504 | 6.14E+08 | 0.20 | -3.18 | 3.71 | 0.06 |
| E1 | GY | 1B | AX.89659812 | 5.94E+08 | 0.15 | -3.47 | 3.52 | 0.05 |
| E1 | GY | 1B | AX.89608451 | 5.95E+08 | 0.15 | -3.69 | 4.00 | 0.06 |
| E1 | GY | 1B | AX.89608451 | 5.95E+08 | 0.15 | -3.69 | 4.00 | 0.06 |
| E1 | GY | 1B | AX.89753324 | 5.49E+08 | 0.49 | 2.42  | 3.41 | 0.05 |
| E1 | GY | 1B | AX.89494755 | 6.62E+08 | 0.05 | -6.01 | 3.98 | 0.06 |
| E1 | GY | 1B | AX.89494755 | 6.62E+08 | 0.05 | -6.01 | 3.98 | 0.06 |
| E1 | GY | 1B | AX.89526794 | 5.90E+08 | 0.27 | -2.70 | 3.35 | 0.06 |
| E1 | GY | 1B | AX.89648440 | 5.71E+08 | 0.09 | -4.20 | 3.32 | 0.05 |
| E1 | GY | 1B | AX.89320059 | 5.95E+08 | 0.15 | -3.72 | 3.98 | 0.06 |
| E1 | GY | 1B | AX.89767080 | 5.45E+08 | 0.20 | -3.19 | 3.67 | 0.06 |
| E1 | GY | 1B | AX.89734677 | 5.48E+08 | 0.19 | -3.13 | 3.50 | 0.05 |
| E1 | GY | 1B | AX.89342515 | 6.14E+08 | 0.20 | -3.19 | 3.67 | 0.06 |
| E1 | GY | 1B | AX.89377815 | 5.62E+08 | 0.28 | -2.82 | 3.69 | 0.05 |
| E1 | GY | 1B | AX.89377815 | 5.62E+08 | 0.28 | -2.82 | 3.69 | 0.05 |
| E1 | GY | 1B | AX.89467073 | 5.32E+08 | 0.07 | -5.27 | 4.29 | 0.07 |
| E1 | GY | 1B | AX.89589298 | 5.95E+08 | 0.15 | -3.72 | 3.98 | 0.06 |
| E1 | GY | 1B | AX.89495626 | 5.48E+08 | 0.19 | -3.13 | 3.50 | 0.05 |
| E1 | GY | 1B | AX.89735423 | 6.15E+08 | 0.20 | -3.18 | 3.71 | 0.06 |
| E1 | GY | 1B | AX.89674301 | 5.62E+08 | 0.28 | -2.83 | 3.73 | 0.06 |
| E1 | GY | 1B | AX.89735505 | 5.50E+08 | 0.26 | -2.95 | 3.80 | 0.06 |
| E1 | GY | 1B | AX.89589597 | 6.14E+08 | 0.20 | -3.18 | 3.71 | 0.06 |
| E1 | GY | 1B | AX.89613526 | 5.72E+08 | 0.09 | -4.20 | 3.32 | 0.05 |
| E1 | GY | 1B | AX.89637173 | 5.66E+08 | 0.14 | -3.56 | 3.61 | 0.06 |

|    |    |    |             |          |      |       |      |      |
|----|----|----|-------------|----------|------|-------|------|------|
| E1 | GY | 1B | AX.89496313 | 6.14E+08 | 0.20 | -3.18 | 3.71 | 0.06 |
| E1 | GY | 1B | AX.89309966 | 5.48E+08 | 0.19 | -3.13 | 3.50 | 0.05 |
| E1 | GY | 1B | AX.89520284 | 5.76E+08 | 0.09 | -4.33 | 3.64 | 0.06 |
| E1 | GY | 1B | AX.89390480 | 5.89E+08 | 0.27 | -2.70 | 3.35 | 0.06 |
| E1 | GY | 1B | AX.89390480 | 5.89E+08 | 0.27 | -2.70 | 3.35 | 0.06 |
| E1 | GY | 1B | AX.89310110 | 5.71E+08 | 0.11 | -3.78 | 3.32 | 0.05 |
| E1 | GY | 1B | AX.89712134 | 5.92E+08 | 0.26 | -2.71 | 3.27 | 0.05 |
| E1 | GY | 1B | AX.89712141 | 4.30E+08 | 0.38 | 2.49  | 3.40 | 0.06 |
| E1 | GY | 1B | AX.89625447 | 6.15E+08 | 0.20 | -3.18 | 3.71 | 0.06 |
| E1 | GY | 1B | AX.89625447 | 6.15E+08 | 0.20 | -3.18 | 3.71 | 0.06 |
| E1 | GY | 1B | AX.89520572 | 5.47E+08 | 0.33 | -2.52 | 3.30 | 0.05 |
| E1 | GY | 1B | AX.89520692 | 5.72E+08 | 0.11 | -3.78 | 3.32 | 0.05 |
| E1 | GY | 1B | AX.89736664 | 5.90E+08 | 0.10 | -4.12 | 3.60 | 0.06 |
| E1 | GY | 1B | AX.89724852 | 5.94E+08 | 0.15 | -3.69 | 4.00 | 0.06 |
| E1 | GY | 1B | AX.89355729 | 5.94E+08 | 0.15 | -3.47 | 3.52 | 0.05 |
| E1 | GY | 1B | AX.89460853 | 5.92E+08 | 0.26 | -2.71 | 3.27 | 0.05 |
| E1 | GY | 1B | AX.89333321 | 5.50E+08 | 0.26 | -3.07 | 4.11 | 0.06 |
| E1 | GY | 1B | AX.89543657 | 5.96E+08 | 0.15 | -3.72 | 3.98 | 0.06 |
| E1 | GY | 1B | AX.89543657 | 5.96E+08 | 0.15 | -3.72 | 3.98 | 0.06 |
| E1 | GY | 1B | AX.89676422 | 5.65E+08 | 0.14 | -3.60 | 3.59 | 0.06 |
| E1 | GY | 1B | AX.89333721 | 6.13E+08 | 0.14 | -3.73 | 3.91 | 0.06 |
| E1 | GY | 1B | AX.89775428 | 5.71E+08 | 0.09 | -4.17 | 3.28 | 0.05 |
| E1 | GY | 1B | AX.89356982 | 6.54E+08 | 0.13 | -3.54 | 3.23 | 0.06 |
| E1 | GY | 1B | AX.89356982 | 6.54E+08 | 0.13 | -3.54 | 3.23 | 0.06 |
| E1 | GY | 1B | AX.89568217 | 5.89E+08 | 0.13 | -4.04 | 4.06 | 0.07 |
| E1 | GY | 1B | AX.89357199 | 5.94E+08 | 0.15 | -3.47 | 3.52 | 0.05 |
| E1 | GY | 1B | AX.89334216 | 5.76E+08 | 0.09 | -4.33 | 3.64 | 0.06 |
| E1 | GY | 1B | AX.89544768 | 5.95E+08 | 0.15 | -3.47 | 3.52 | 0.05 |
| E1 | GY | 1B | AX.89767080 | 5.45E+08 | 0.20 | -3.19 | 3.67 | 0.06 |
| E1 | GY | 1B | AX.89710848 | 5.95E+08 | 0.14 | -3.50 | 3.50 | 0.05 |
| E1 | GY | 1B | AX.89381080 | 5.62E+08 | 0.16 | -3.68 | 4.17 | 0.07 |
| E1 | GY | 1B | AX.89346068 | 6.14E+08 | 0.20 | -3.19 | 3.67 | 0.06 |
| E1 | GY | 1B | AX.89727207 | 5.94E+08 | 0.15 | -3.69 | 4.00 | 0.06 |
| E1 | GY | 1B | AX.89334781 | 5.96E+08 | 0.15 | -3.72 | 3.98 | 0.06 |
| E1 | GY | 1B | AX.89381566 | 5.73E+08 | 0.09 | -4.93 | 4.38 | 0.07 |
| E1 | GY | 1B | AX.89524034 | 6.46E+08 | 0.07 | -4.89 | 3.58 | 0.06 |
| E1 | GY | 1B | AX.89430167 | 5.71E+08 | 0.08 | -4.16 | 3.00 | 0.05 |
| E1 | GY | 1B | AX.89507929 | 5.43E+08 | 0.44 | -2.82 | 4.39 | 0.08 |
| E1 | GY | 1B | AX.89594265 | 5.76E+08 | 0.09 | -4.33 | 3.64 | 0.06 |
| E1 | GY | 1B | AX.89325626 | 5.43E+08 | 0.41 | -2.68 | 3.95 | 0.07 |
| E1 | GY | 1B | AX.89325626 | 5.43E+08 | 0.41 | -2.68 | 3.95 | 0.07 |
| E1 | GY | 1B | AX.89629310 | 6.14E+08 | 0.19 | -3.07 | 3.39 | 0.05 |
| E1 | GY | 1B | AX.89764735 | 4.30E+08 | 0.39 | 2.57  | 3.60 | 0.07 |
| E1 | GY | 1B | AX.89535186 | 5.72E+08 | 0.11 | -3.78 | 3.32 | 0.05 |
| E1 | GY | 1B | AX.89751699 | 5.50E+08 | 0.26 | -3.07 | 4.11 | 0.06 |
| E1 | GY | 1B | AX.89751699 | 5.50E+08 | 0.26 | -3.07 | 4.11 | 0.06 |
| E1 | GY | 1B | AX.89359652 | 5.92E+08 | 0.27 | -2.54 | 3.01 | 0.04 |
| E1 | GY | 1B | AX.89703958 | 6.15E+08 | 0.20 | -3.18 | 3.71 | 0.06 |
| E1 | GY | 1B | AX.89463857 | 5.91E+08 | 0.25 | -2.69 | 3.20 | 0.05 |
| E1 | GY | 1B | AX.89359791 | 5.32E+08 | 0.22 | -3.29 | 4.16 | 0.06 |

|    |    |    |             |          |      |       |      |      |
|----|----|----|-------------|----------|------|-------|------|------|
| E1 | GY | 1B | AX.89765557 | 6.14E+08 | 0.20 | -3.19 | 3.67 | 0.06 |
| E1 | GY | 1B | AX.89679299 | 6.14E+08 | 0.20 | -3.19 | 3.67 | 0.06 |
| E1 | GY | 1B | AX.89536040 | 4.73E+08 | 0.14 | -3.52 | 3.53 | 0.06 |
| E1 | GY | 1B | AX.89500889 | 6.61E+08 | 0.15 | -3.12 | 3.01 | 0.04 |
| E1 | GY | 1B | AX.89403636 | 6.14E+08 | 0.20 | -3.18 | 3.71 | 0.06 |
| E1 | GY | 1B | AX.89403636 | 6.14E+08 | 0.20 | -3.18 | 3.71 | 0.06 |
| E1 | GY | 1B | AX.89490329 | 5.73E+08 | 0.08 | -4.44 | 3.50 | 0.05 |
| E1 | GY | 1B | AX.89765932 | 6.16E+08 | 0.20 | -3.18 | 3.71 | 0.06 |
| E1 | GY | 1B | AX.89765932 | 6.16E+08 | 0.20 | -3.18 | 3.71 | 0.06 |
| E1 | GY | 1B | AX.89725397 | 5.63E+08 | 0.48 | -2.36 | 3.25 | 0.05 |
| E1 | GY | 1B | AX.89372821 | 5.91E+08 | 0.10 | -4.12 | 3.60 | 0.06 |
| E1 | GY | 1B | AX.89536555 | 6.15E+08 | 0.20 | -3.18 | 3.71 | 0.06 |
| E1 | GY | 1B | AX.89315126 | 5.91E+08 | 0.25 | -2.69 | 3.20 | 0.05 |
| E1 | GY | 1B | AX.89655760 | 6.46E+08 | 0.07 | -4.89 | 3.58 | 0.06 |
| E1 | GY | 1B | AX.89571554 | 6.14E+08 | 0.20 | -3.16 | 3.73 | 0.06 |
| E1 | GY | 1B | AX.89571554 | 6.14E+08 | 0.20 | -3.16 | 3.73 | 0.06 |
| E1 | GY | 1B | AX.89454580 | 6.14E+08 | 0.20 | -3.14 | 3.68 | 0.06 |
| E1 | GY | 1B | AX.89373054 | 6.15E+08 | 0.20 | -3.14 | 3.64 | 0.06 |
| E1 | GY | 1B | AX.89361355 | 4.72E+08 | 0.14 | -3.56 | 3.51 | 0.06 |
| E1 | GY | 1B | AX.89361485 | 6.15E+08 | 0.20 | -3.18 | 3.71 | 0.06 |
| E1 | GY | 1B | AX.89537204 | 6.13E+08 | 0.17 | -3.08 | 3.11 | 0.05 |
| E1 | GY | 1B | AX.89627039 | 5.71E+08 | 0.15 | -3.40 | 3.40 | 0.05 |
| E1 | GY | 1B | AX.89511243 | 5.45E+08 | 0.33 | -2.44 | 3.12 | 0.04 |
| E1 | GY | 1B | AX.89373658 | 5.32E+08 | 0.24 | -3.26 | 4.37 | 0.07 |
| E1 | GY | 1B | AX.89714488 | 5.71E+08 | 0.08 | -4.31 | 3.33 | 0.05 |
| E1 | GY | 1B | AX.89644425 | 5.71E+08 | 0.09 | -4.20 | 3.32 | 0.05 |
| E1 | GY | 1B | AX.89584485 | 4.46E+07 | 0.47 | 2.36  | 3.24 | 0.05 |
| E1 | GY | 1B | AX.89467073 | 5.32E+08 | 0.07 | -5.27 | 4.29 | 0.07 |
| E1 | GY | 1B | AX.89503677 | 6.29E+08 | 0.08 | -4.40 | 3.45 | 0.05 |
| E1 | GY | 1B | AX.89437602 | 5.91E+08 | 0.10 | -4.12 | 3.60 | 0.06 |
| E1 | GY | 1B | AX.89492307 | 5.75E+08 | 0.09 | -4.33 | 3.64 | 0.06 |
| E1 | GY | 1B | AX.89467807 | 5.46E+08 | 0.34 | -2.58 | 3.47 | 0.05 |
| E1 | GY | 1B | AX.89467807 | 5.46E+08 | 0.34 | -2.58 | 3.47 | 0.05 |
| E1 | GY | 1B | AX.89504198 | 6.14E+08 | 0.19 | -2.97 | 3.21 | 0.05 |
| E1 | GY | 1B | AX.89434410 | 5.90E+08 | 0.25 | -2.74 | 3.27 | 0.05 |
| E1 | GY | 1B | AX.89550273 | 5.94E+08 | 0.15 | -3.69 | 4.00 | 0.06 |
| E1 | GY | 1B | AX.89558501 | 5.73E+08 | 0.08 | -4.80 | 3.83 | 0.06 |
| E1 | GY | 1B | AX.89340424 | 5.62E+08 | 0.28 | -2.69 | 3.42 | 0.05 |
| E1 | GY | 1B | AX.89610620 | 5.93E+08 | 0.13 | -3.93 | 3.98 | 0.06 |
| E1 | GY | 1B | AX.89610620 | 5.93E+08 | 0.13 | -3.93 | 3.98 | 0.06 |
| E1 | GY | 1B | AX.89683293 | 5.71E+08 | 0.09 | -4.20 | 3.32 | 0.05 |
| E1 | GY | 1B | AX.89634659 | 6.15E+08 | 0.20 | -3.18 | 3.71 | 0.06 |
| E1 | GY | 1B | AX.89400218 | 5.49E+08 | 0.13 | -3.58 | 3.29 | 0.05 |
| E1 | GY | 1B | AX.89387161 | 5.48E+08 | 0.19 | -3.13 | 3.50 | 0.05 |
| E1 | GY | 1B | AX.89697293 | 5.47E+08 | 0.33 | -2.50 | 3.24 | 0.05 |
| E1 | GY | 1B | AX.89647056 | 5.43E+08 | 0.46 | -2.72 | 4.15 | 0.08 |
| E1 | GY | 1B | AX.89400603 | 5.48E+08 | 0.19 | -3.13 | 3.50 | 0.05 |
| E1 | GY | 1B | AX.89400618 | 5.96E+08 | 0.15 | -3.72 | 3.98 | 0.06 |
| E1 | GY | 1B | AX.89400618 | 5.96E+08 | 0.15 | -3.72 | 3.98 | 0.06 |
| E1 | GY | 1B | AX.89722018 | 5.90E+08 | 0.27 | -2.80 | 3.54 | 0.06 |

|    |    |    |             |          |      |       |      |      |
|----|----|----|-------------|----------|------|-------|------|------|
| E1 | GY | 1B | AX.89575021 | 5.72E+08 | 0.09 | -4.20 | 3.32 | 0.05 |
| E1 | GY | 1B | AX.89575021 | 5.72E+08 | 0.09 | -4.20 | 3.32 | 0.05 |
| E1 | GY | 1B | AX.89759919 | 5.90E+08 | 0.27 | -2.69 | 3.30 | 0.06 |
| E1 | GY | 1B | AX.89655838 | 5.90E+08 | 0.27 | -2.69 | 3.30 | 0.06 |
| E1 | GY | 1B | AX.89655838 | 5.90E+08 | 0.27 | -2.69 | 3.30 | 0.06 |
| E1 | GY | 1B | AX.89660011 | 6.13E+08 | 0.14 | -3.73 | 3.91 | 0.06 |
| E1 | GY | 1B | AX.89470072 | 5.71E+08 | 0.09 | -4.20 | 3.32 | 0.05 |
| E1 | GY | 1B | AX.89424158 | 5.29E+08 | 0.35 | 2.36  | 3.02 | 0.04 |
| E1 | GY | 1B | AX.89770837 | 5.43E+08 | 0.44 | -2.72 | 4.11 | 0.07 |
| E1 | GY | 1B | AX.89694069 | 6.54E+08 | 0.14 | -3.31 | 3.11 | 0.06 |
| E1 | GY | 1B | AX.89601293 | 6.14E+08 | 0.20 | -3.19 | 3.67 | 0.06 |
| E1 | GY | 1B | AX.89698290 | 5.44E+08 | 0.45 | -2.36 | 3.23 | 0.05 |
| E1 | GY | 1B | AX.89589021 | 6.13E+08 | 0.14 | -3.73 | 3.91 | 0.06 |
| E1 | GY | 1B | AX.89552029 | 4.30E+08 | 0.38 | 2.47  | 3.37 | 0.06 |
| E1 | GY | 1B | AX.89679010 | 6.16E+08 | 0.20 | -3.18 | 3.71 | 0.06 |
| E1 | GY | 1B | AX.89589368 | 5.71E+08 | 0.15 | -3.40 | 3.40 | 0.05 |
| E1 | GY | 1B | AX.89674301 | 5.62E+08 | 0.28 | -2.83 | 3.73 | 0.06 |
| E1 | GY | 1B | AX.89553218 | 5.62E+08 | 0.28 | -2.67 | 3.38 | 0.05 |
| E1 | GY | 1B | AX.89613020 | 6.15E+08 | 0.20 | -3.18 | 3.71 | 0.06 |
| E1 | GY | 1B | AX.89613020 | 6.15E+08 | 0.20 | -3.18 | 3.71 | 0.06 |
| E1 | GY | 1B | AX.89589597 | 6.14E+08 | 0.20 | -3.18 | 3.71 | 0.06 |
| E1 | GY | 1B | AX.89471968 | 5.71E+08 | 0.09 | -4.20 | 3.32 | 0.05 |
| E1 | GY | 1B | AX.89637173 | 5.66E+08 | 0.14 | -3.56 | 3.61 | 0.06 |
| E1 | GY | 1B | AX.89751131 | 5.71E+08 | 0.09 | -4.20 | 3.32 | 0.05 |
| E1 | GY | 1B | AX.89751131 | 5.71E+08 | 0.09 | -4.20 | 3.32 | 0.05 |
| E1 | GY | 1B | AX.89472257 | 5.32E+08 | 0.20 | -3.17 | 3.68 | 0.06 |
| E1 | GY | 1B | AX.89472257 | 5.32E+08 | 0.20 | -3.17 | 3.68 | 0.06 |
| E1 | GY | 1B | AX.89621545 | 5.71E+08 | 0.09 | -4.20 | 3.32 | 0.05 |
| E1 | GY | 1B | AX.89621545 | 5.71E+08 | 0.09 | -4.20 | 3.32 | 0.05 |
| E1 | GY | 1B | AX.89367182 | 5.95E+08 | 0.17 | -3.45 | 3.80 | 0.06 |
| E1 | GY | 1B | AX.89367182 | 5.95E+08 | 0.17 | -3.45 | 3.80 | 0.06 |
| E1 | GY | 1B | AX.89367256 | 5.91E+08 | 0.27 | -2.80 | 3.54 | 0.06 |
| E1 | GY | 1B | AX.89712134 | 5.92E+08 | 0.26 | -2.71 | 3.27 | 0.05 |
| E1 | GY | 1B | AX.89712141 | 4.30E+08 | 0.38 | 2.49  | 3.40 | 0.06 |
| E1 | GY | 1B | AX.89590842 | 6.15E+08 | 0.20 | -3.18 | 3.71 | 0.06 |
| E1 | GY | 1B | AX.89486405 | 5.94E+08 | 0.15 | -3.72 | 3.98 | 0.06 |
| E1 | GY | 1B | AX.89543383 | 5.94E+08 | 0.15 | -3.47 | 3.52 | 0.05 |
| E1 | GY | 1B | AX.89509761 | 5.43E+08 | 0.41 | -2.57 | 3.68 | 0.06 |
| E1 | GY | 1B | AX.89770151 | 6.15E+08 | 0.20 | -3.18 | 3.71 | 0.06 |
| E1 | GY | 1B | AX.89770151 | 6.15E+08 | 0.20 | -3.18 | 3.71 | 0.06 |
| E1 | GY | 1B | AX.89333721 | 6.13E+08 | 0.14 | -3.73 | 3.91 | 0.06 |
| E1 | GY | 1B | AX.89510480 | 6.14E+08 | 0.20 | -3.16 | 3.67 | 0.06 |
| E1 | GY | 1B | AX.89578881 | 5.45E+08 | 0.33 | -2.57 | 3.42 | 0.05 |
| E1 | GY | 1B | AX.89380858 | 5.94E+08 | 0.15 | -3.69 | 4.00 | 0.06 |
| E1 | GY | 1B | AX.89771477 | 6.15E+08 | 0.20 | -3.18 | 3.71 | 0.06 |
| E1 | GY | 1B | AX.89405354 | 5.28E+08 | 0.35 | 2.36  | 3.02 | 0.04 |
| E1 | GY | 1B | AX.89742936 | 5.89E+08 | 0.27 | -2.70 | 3.35 | 0.06 |
| E1 | GY | 1B | AX.89632144 | 5.90E+08 | 0.25 | -2.74 | 3.27 | 0.05 |
| E1 | GY | 1B | AX.89605104 | 5.76E+08 | 0.09 | -4.33 | 3.64 | 0.06 |
| E1 | GY | 1B | AX.89616764 | 6.14E+08 | 0.20 | -3.19 | 3.67 | 0.06 |

|    |      |    |             |          |      |        |      |      |
|----|------|----|-------------|----------|------|--------|------|------|
| E1 | SPM2 | 1B | AX.89457469 | 6.41E+08 | 0.05 | -39.29 | 3.13 | 0.06 |
| E1 | GY   | 1B | AX.89727207 | 5.94E+08 | 0.15 | -3.69  | 4.00 | 0.06 |
| E1 | GY   | 1B | AX.89561467 | 5.48E+08 | 0.20 | -3.03  | 3.36 | 0.05 |
| E1 | GY   | 1B | AX.89546235 | 6.14E+08 | 0.20 | -3.18  | 3.71 | 0.06 |
| E1 | GY   | 1B | AX.89546341 | 5.94E+08 | 0.15 | -3.69  | 4.00 | 0.06 |
| E1 | GY   | 1B | AX.89760457 | 5.90E+08 | 0.25 | -2.69  | 3.20 | 0.05 |
| E1 | GY   | 1B | AX.89617894 | 6.14E+08 | 0.20 | -3.19  | 3.67 | 0.06 |
| E1 | GY   | 1B | AX.89359652 | 5.92E+08 | 0.27 | -2.54  | 3.01 | 0.04 |
| E1 | GY   | 1B | AX.89581957 | 5.95E+08 | 0.15 | -3.72  | 3.98 | 0.06 |
| E1 | GY   | 1B | AX.89637878 | 5.89E+08 | 0.27 | -2.70  | 3.35 | 0.06 |
| E1 | GY   | 1B | AX.89431323 | 5.91E+08 | 0.24 | -2.66  | 3.07 | 0.04 |
| E1 | GY   | 1B | AX.89431323 | 5.91E+08 | 0.24 | -2.66  | 3.07 | 0.04 |
| E1 | GY   | 1B | AX.89765882 | 6.46E+08 | 0.07 | -4.89  | 3.58 | 0.06 |
| E1 | GY   | 1B | AX.89477534 | 5.62E+08 | 0.28 | -2.83  | 3.73 | 0.06 |
| E1 | GY   | 1B | AX.89513960 | 6.13E+08 | 0.16 | -3.17  | 3.22 | 0.05 |
| E1 | GY   | 1B | AX.89510021 | 5.73E+08 | 0.08 | -4.44  | 3.50 | 0.05 |
| E1 | GY   | 1B | AX.89408237 | 6.14E+08 | 0.20 | -3.19  | 3.67 | 0.06 |
| E1 | GY   | 1B | AX.89465482 | 5.43E+08 | 0.41 | -2.68  | 3.95 | 0.07 |
| E1 | GY   | 1B | AX.89536494 | 5.47E+08 | 0.19 | -3.13  | 3.50 | 0.05 |
| E1 | GY   | 1B | AX.89419135 | 4.29E+08 | 0.38 | 2.49   | 3.40 | 0.06 |
| E1 | GY   | 1B | AX.89583603 | 6.13E+08 | 0.14 | -3.73  | 3.91 | 0.06 |
| E1 | GY   | 1B | AX.89583789 | 5.71E+08 | 0.09 | -4.20  | 3.32 | 0.05 |
| E1 | GY   | 1B | AX.89515290 | 5.32E+08 | 0.20 | -3.17  | 3.68 | 0.06 |
| E1 | GY   | 1B | AX.89515290 | 5.32E+08 | 0.20 | -3.17  | 3.68 | 0.06 |
| E1 | GY   | 1B | AX.89702421 | 5.91E+08 | 0.25 | -2.69  | 3.20 | 0.05 |
| E1 | GY   | 1B | AX.89714925 | 5.71E+08 | 0.09 | -4.20  | 3.32 | 0.05 |
| E1 | GY   | 1B | AX.89537771 | 5.48E+08 | 0.19 | -3.13  | 3.50 | 0.05 |
| E1 | GY   | 1B | AX.89338664 | 5.62E+08 | 0.28 | -2.82  | 3.69 | 0.05 |
| E1 | GY   | 1B | AX.89516076 | 5.50E+08 | 0.26 | -3.07  | 4.11 | 0.06 |
| E1 | GY   | 1B | AX.89428640 | 5.91E+08 | 0.26 | -2.71  | 3.27 | 0.05 |
| E1 | GY   | 1B | AX.89428640 | 5.91E+08 | 0.26 | -2.71  | 3.27 | 0.05 |
| E1 | GY   | 1B | AX.89437602 | 5.91E+08 | 0.10 | -4.12  | 3.60 | 0.06 |
| E1 | GY   | 1B | AX.89375029 | 5.89E+08 | 0.27 | -2.70  | 3.35 | 0.06 |
| E1 | GY   | 1B | AX.89680841 | 5.43E+08 | 0.25 | -3.71  | 5.55 | 0.09 |
| E1 | GY   | 1B | AX.89434131 | 5.73E+08 | 0.08 | -4.44  | 3.50 | 0.05 |
| E1 | GY   | 1B | AX.89339603 | 6.13E+08 | 0.14 | -3.73  | 3.91 | 0.06 |
| E1 | GY   | 1B | AX.89434410 | 5.90E+08 | 0.25 | -2.74  | 3.27 | 0.05 |
| E1 | GY   | 1B | AX.86161856 | 5.72E+08 | 0.11 | -3.85  | 3.31 | 0.05 |
| E1 | GY   | 1B | AX.89573521 | 6.14E+08 | 0.20 | -3.18  | 3.71 | 0.06 |
| E1 | GY   | 1B | AX.89573521 | 6.14E+08 | 0.20 | -3.18  | 3.71 | 0.06 |
| E1 | GY   | 1B | AX.89535375 | 5.49E+08 | 0.13 | -3.58  | 3.29 | 0.05 |
| E1 | GY   | 1B | AX.89340249 | 6.14E+08 | 0.20 | -3.19  | 3.67 | 0.06 |
| E1 | GY   | 1B | AX.89386642 | 5.75E+08 | 0.09 | -4.33  | 3.64 | 0.06 |
| E1 | GY   | 1B | AX.89622088 | 5.91E+08 | 0.25 | -2.69  | 3.20 | 0.05 |
| E1 | GY   | 1B | AX.89329223 | 4.30E+08 | 0.39 | 2.57   | 3.60 | 0.07 |
| E1 | GY   | 1B | AX.89329223 | 4.30E+08 | 0.39 | 2.57   | 3.60 | 0.07 |
| E1 | GY   | 1B | AX.89376184 | 5.89E+08 | 0.27 | -2.70  | 3.35 | 0.06 |
| E1 | GY   | 1B | AX.89490318 | 6.14E+08 | 0.20 | -3.26  | 3.83 | 0.06 |
| E1 | GY   | 1B | AX.89721858 | 5.89E+08 | 0.13 | -4.04  | 4.06 | 0.07 |
| E1 | GY   | 1B | AX.89721912 | 5.90E+08 | 0.10 | -4.12  | 3.60 | 0.06 |

|    |    |    |             |          |      |       |      |      |
|----|----|----|-------------|----------|------|-------|------|------|
| E1 | GY | 1B | AX.89721912 | 5.90E+08 | 0.10 | -4.12 | 3.60 | 0.06 |
| E1 | GY | 1B | AX.89655645 | 5.44E+08 | 0.42 | -2.51 | 3.55 | 0.06 |
| E1 | GY | 1B | AX.89655645 | 5.44E+08 | 0.42 | -2.51 | 3.55 | 0.06 |
| E1 | GY | 1B | AX.89705262 | 6.14E+08 | 0.20 | -3.18 | 3.71 | 0.06 |
| E1 | GY | 1B | AX.89540478 | 5.74E+08 | 0.09 | -4.33 | 3.64 | 0.06 |
| E1 | GY | 1B | AX.89587635 | 6.16E+08 | 0.20 | -3.18 | 3.71 | 0.06 |
| E1 | GY | 1B | AX.86166370 | 6.15E+08 | 0.20 | -3.18 | 3.71 | 0.06 |
| E1 | GY | 1B | AX.89659895 | 6.14E+08 | 0.20 | -3.19 | 3.67 | 0.06 |
| E1 | GY | 1B | AX.89753324 | 5.49E+08 | 0.49 | 2.42  | 3.41 | 0.05 |
| E1 | GY | 1B | AX.89714920 | 5.43E+08 | 0.41 | -2.57 | 3.68 | 0.06 |
| E1 | GY | 1B | AX.89714920 | 5.43E+08 | 0.41 | -2.57 | 3.68 | 0.06 |
| E1 | GY | 1B | AX.89401886 | 5.95E+08 | 0.14 | -3.50 | 3.50 | 0.05 |
| E1 | GY | 1B | AX.89589021 | 6.13E+08 | 0.14 | -3.73 | 3.91 | 0.06 |
| E1 | GY | 1B | AX.89519215 | 5.64E+08 | 0.12 | -3.79 | 3.53 | 0.05 |
| E1 | GY | 1B | AX.89519215 | 5.64E+08 | 0.12 | -3.79 | 3.53 | 0.05 |
| E1 | GY | 1B | AX.89679010 | 6.16E+08 | 0.20 | -3.18 | 3.71 | 0.06 |
| E1 | GY | 1B | AX.89756912 | 4.74E+08 | 0.14 | -3.56 | 3.51 | 0.06 |
| E1 | GY | 1B | AX.89756912 | 4.74E+08 | 0.14 | -3.56 | 3.51 | 0.06 |
| E1 | GY | 1B | AX.89636906 | 6.15E+08 | 0.20 | -3.18 | 3.71 | 0.06 |
| E1 | GY | 1B | AX.89636906 | 6.15E+08 | 0.20 | -3.18 | 3.71 | 0.06 |
| E1 | GY | 1B | AX.89471727 | 6.16E+08 | 0.20 | -3.18 | 3.71 | 0.06 |
| E1 | GY | 1B | AX.89541312 | 5.50E+08 | 0.26 | -3.07 | 4.11 | 0.06 |
| E1 | GY | 1B | AX.89541312 | 5.50E+08 | 0.26 | -3.07 | 4.11 | 0.06 |
| E1 | GY | 1B | AX.89471968 | 5.71E+08 | 0.09 | -4.20 | 3.32 | 0.05 |
| E1 | GY | 1B | AX.89613526 | 5.72E+08 | 0.09 | -4.20 | 3.32 | 0.05 |
| E1 | GY | 1B | AX.89577198 | 5.89E+08 | 0.27 | -2.70 | 3.35 | 0.06 |
| E1 | GY | 1B | AX.89528229 | 6.15E+08 | 0.20 | -3.18 | 3.71 | 0.06 |
| E1 | GY | 1B | AX.89699324 | 5.64E+08 | 0.11 | -3.58 | 3.03 | 0.05 |
| E1 | GY | 1B | AX.89624962 | 6.15E+08 | 0.20 | -3.19 | 3.67 | 0.06 |
| E1 | GY | 1B | AX.89624962 | 6.15E+08 | 0.20 | -3.19 | 3.67 | 0.06 |
| E1 | GY | 1B | AX.89585539 | 6.14E+08 | 0.20 | -3.18 | 3.71 | 0.06 |
| E1 | GY | 1B | AX.89414699 | 5.95E+08 | 0.15 | -3.69 | 4.00 | 0.06 |
| E1 | GY | 1B | AX.89485879 | 6.15E+08 | 0.20 | -3.18 | 3.71 | 0.06 |
| E1 | GY | 1B | AX.89755321 | 6.14E+08 | 0.20 | -3.19 | 3.67 | 0.06 |
| E1 | GY | 1B | AX.89675132 | 5.71E+08 | 0.09 | -4.20 | 3.32 | 0.05 |
| E1 | GY | 1B | AX.89504471 | 5.95E+08 | 0.15 | -3.69 | 4.00 | 0.06 |
| E1 | GY | 1B | AX.89411589 | 5.66E+08 | 0.16 | -3.04 | 3.00 | 0.04 |
| E1 | GY | 1B | AX.89310641 | 5.48E+08 | 0.19 | -3.13 | 3.50 | 0.05 |
| E1 | GY | 1B | AX.89436079 | 6.15E+08 | 0.17 | -3.09 | 3.14 | 0.05 |
| E1 | GY | 1B | AX.89774250 | 6.15E+08 | 0.20 | -3.18 | 3.71 | 0.06 |
| E1 | GY | 1B | AX.89774250 | 6.15E+08 | 0.20 | -3.18 | 3.71 | 0.06 |
| E1 | GY | 1B | AX.89344807 | 6.16E+08 | 0.20 | -3.18 | 3.71 | 0.06 |
| E1 | GY | 1B | AX.89713215 | 5.48E+08 | 0.19 | -3.13 | 3.50 | 0.05 |
| E1 | GY | 1B | AX.89415762 | 5.91E+08 | 0.26 | -2.71 | 3.27 | 0.05 |
| E1 | GY | 1B | AX.89591657 | 5.72E+08 | 0.09 | -4.20 | 3.32 | 0.05 |
| E1 | GY | 1B | AX.89595965 | 5.49E+08 | 0.26 | -3.07 | 4.11 | 0.06 |
| E1 | GY | 1B | AX.89595965 | 5.49E+08 | 0.26 | -3.07 | 4.11 | 0.06 |
| E1 | GY | 1B | AX.89672607 | 5.93E+08 | 0.30 | -2.66 | 3.46 | 0.06 |
| E1 | GY | 1B | AX.89635603 | 5.94E+08 | 0.15 | -3.47 | 3.52 | 0.05 |
| E1 | GY | 1B | AX.89380688 | 5.90E+08 | 0.27 | -2.70 | 3.35 | 0.06 |



|    |    |    |             |          |      |       |      |      |
|----|----|----|-------------|----------|------|-------|------|------|
| E1 | GY | 1B | AX.89345478 | 5.89E+08 | 0.13 | -4.04 | 4.06 | 0.07 |
| E1 | GY | 1B | AX.89345478 | 5.89E+08 | 0.13 | -4.04 | 4.06 | 0.07 |
| E1 | GY | 1B | AX.89544768 | 5.95E+08 | 0.15 | -3.47 | 3.52 | 0.05 |
| E1 | GY | 1B | AX.89380977 | 1.78E+07 | 0.22 | -2.82 | 3.20 | 0.05 |
| E1 | GY | 1B | AX.89596577 | 5.95E+08 | 0.15 | -3.72 | 3.98 | 0.06 |
| E1 | GY | 1B | AX.89346068 | 6.14E+08 | 0.20 | -3.19 | 3.67 | 0.06 |
| E1 | GY | 1B | AX.89665857 | 5.74E+08 | 0.09 | -4.33 | 3.64 | 0.06 |
| E1 | GY | 1B | AX.89665857 | 5.74E+08 | 0.09 | -4.33 | 3.64 | 0.06 |
| E1 | GY | 1B | AX.89653613 | 5.44E+08 | 0.44 | -2.45 | 3.44 | 0.06 |
| E1 | GY | 1B | AX.89417724 | 5.94E+08 | 0.15 | -3.47 | 3.52 | 0.05 |
| E1 | GY | 1B | AX.89524034 | 6.46E+08 | 0.07 | -4.89 | 3.58 | 0.06 |
| E1 | GY | 1B | AX.89557668 | 5.75E+08 | 0.09 | -4.33 | 3.64 | 0.06 |
| E1 | GY | 1B | AX.89546235 | 6.14E+08 | 0.20 | -3.18 | 3.71 | 0.06 |
| E1 | GY | 1B | AX.89686858 | 6.13E+08 | 0.14 | -3.73 | 3.91 | 0.06 |
| E1 | GY | 1B | AX.89500077 | 4.73E+08 | 0.14 | -3.52 | 3.53 | 0.06 |
| E1 | GY | 1B | AX.89524464 | 5.89E+08 | 0.27 | -2.70 | 3.35 | 0.06 |
| E1 | GY | 1B | AX.89728530 | 5.96E+08 | 0.15 | -3.72 | 3.98 | 0.06 |
| E1 | GY | 1B | AX.89728530 | 5.96E+08 | 0.15 | -3.72 | 3.98 | 0.06 |
| E1 | GY | 1B | AX.89692308 | 5.95E+08 | 0.15 | -3.72 | 3.98 | 0.06 |
| E1 | GY | 1B | AX.89692308 | 5.95E+08 | 0.15 | -3.72 | 3.98 | 0.06 |
| E1 | GY | 1B | AX.89372056 | 5.96E+08 | 0.15 | -3.72 | 3.98 | 0.06 |
| E1 | GY | 1B | AX.89525338 | 5.73E+08 | 0.08 | -4.58 | 3.53 | 0.06 |
| E1 | GY | 1B | AX.89314421 | 5.92E+08 | 0.26 | -2.71 | 3.27 | 0.05 |
| E1 | GY | 1B | AX.89391459 | 4.82E+08 | 0.13 | 3.35  | 3.02 | 0.04 |
| E1 | GY | 1B | AX.89454201 | 6.15E+08 | 0.20 | -3.18 | 3.71 | 0.06 |
| E1 | GY | 1B | AX.89326749 | 5.71E+08 | 0.09 | -4.20 | 3.32 | 0.05 |
| E1 | GY | 1B | AX.89578393 | 5.71E+08 | 0.09 | -4.20 | 3.32 | 0.05 |
| E1 | GY | 1B | AX.89693026 | 5.66E+08 | 0.14 | -3.56 | 3.61 | 0.06 |
| E1 | GY | 1B | AX.89693026 | 5.66E+08 | 0.14 | -3.56 | 3.61 | 0.06 |
| E1 | GY | 1B | AX.89372821 | 5.91E+08 | 0.10 | -4.12 | 3.60 | 0.06 |
| E1 | GY | 1B | AX.89465484 | 5.50E+08 | 0.26 | -3.07 | 4.11 | 0.06 |
| E1 | GY | 1B | AX.89751221 | 5.32E+08 | 0.20 | -3.18 | 3.65 | 0.06 |
| E1 | GY | 1B | AX.89384148 | 5.76E+08 | 0.09 | -4.33 | 3.64 | 0.06 |
| E1 | GY | 1B | AX.89749378 | 6.32E+08 | 0.08 | -4.54 | 3.63 | 0.06 |
| E1 | GY | 1B | AX.89454719 | 5.91E+08 | 0.10 | -4.12 | 3.60 | 0.06 |
| E1 | GY | 1B | AX.89564257 | 6.14E+08 | 0.20 | -3.19 | 3.67 | 0.06 |
| E1 | GY | 1B | AX.89564257 | 6.14E+08 | 0.20 | -3.19 | 3.67 | 0.06 |
| E1 | GY | 1B | AX.89327316 | 5.95E+08 | 0.15 | -3.72 | 3.98 | 0.06 |
| E1 | GY | 1B | AX.89315865 | 5.71E+08 | 0.09 | -4.20 | 3.32 | 0.05 |
| E1 | GY | 1B | AX.89526794 | 5.90E+08 | 0.27 | -2.70 | 3.35 | 0.06 |
| E1 | GY | 1B | AX.89765713 | 6.21E+08 | 0.19 | -3.20 | 3.64 | 0.06 |
| E1 | GY | 1B | AX.89349463 | 5.48E+08 | 0.19 | -3.13 | 3.50 | 0.05 |
| E1 | GY | 1B | AX.89586686 | 5.48E+08 | 0.19 | -3.13 | 3.50 | 0.05 |
| E1 | GY | 1B | AX.89454941 | 4.30E+08 | 0.39 | 2.57  | 3.60 | 0.07 |
| E1 | GY | 1B | AX.89511243 | 5.45E+08 | 0.33 | -2.44 | 3.12 | 0.04 |
| E1 | GY | 1B | AX.89462493 | 5.95E+08 | 0.15 | -3.47 | 3.52 | 0.05 |
| E1 | GY | 1B | AX.89640474 | 5.89E+08 | 0.13 | -4.04 | 4.06 | 0.07 |
| E1 | GY | 1B | AX.89640474 | 5.89E+08 | 0.13 | -4.04 | 4.06 | 0.07 |
| E1 | GY | 1B | AX.89317078 | 6.14E+08 | 0.20 | -3.19 | 3.67 | 0.06 |
| E1 | GY | 1B | AX.89421570 | 6.14E+08 | 0.16 | -3.17 | 3.22 | 0.05 |

|    |    |    |             |          |      |       |      |      |
|----|----|----|-------------|----------|------|-------|------|------|
| E1 | GY | 1B | AX.89649127 | 5.73E+08 | 0.08 | -4.42 | 3.32 | 0.05 |
| E1 | GY | 1B | AX.89649127 | 5.73E+08 | 0.08 | -4.42 | 3.32 | 0.05 |
| E1 | GY | 1B | AX.89528405 | 5.89E+08 | 0.12 | -4.11 | 4.06 | 0.08 |
| E1 | GY | 1B | AX.89769126 | 4.72E+08 | 0.14 | -3.52 | 3.53 | 0.06 |
| E1 | GY | 1B | AX.89769126 | 4.72E+08 | 0.14 | -3.52 | 3.53 | 0.06 |
| E1 | GY | 1B | AX.89670540 | 5.71E+08 | 0.09 | -4.20 | 3.32 | 0.05 |
| E1 | GY | 1B | AX.89512987 | 5.71E+08 | 0.09 | -4.20 | 3.32 | 0.05 |
| E1 | GY | 1B | AX.89598726 | 5.72E+08 | 0.09 | -4.20 | 3.32 | 0.05 |
| E1 | GY | 1B | AX.89598726 | 5.72E+08 | 0.09 | -4.20 | 3.32 | 0.05 |
| E1 | GY | 1B | AX.89691473 | 5.96E+08 | 0.15 | -3.72 | 3.98 | 0.06 |
| E1 | GY | 1B | AX.89535375 | 5.49E+08 | 0.13 | -3.58 | 3.29 | 0.05 |
| E1 | GY | 1B | AX.89573650 | 6.15E+08 | 0.20 | -3.18 | 3.71 | 0.06 |
| E1 | GY | 1B | AX.89386642 | 5.75E+08 | 0.09 | -4.33 | 3.64 | 0.06 |
| E1 | GY | 1B | AX.89568032 | 6.15E+08 | 0.20 | -3.18 | 3.71 | 0.06 |
| E1 | GY | 1B | AX.89625060 | 5.50E+08 | 0.13 | -3.47 | 3.13 | 0.05 |
| E1 | GY | 1B | AX.89563144 | 5.72E+08 | 0.11 | -3.78 | 3.32 | 0.05 |
| E1 | GY | 1B | AX.89386960 | 5.73E+08 | 0.08 | -4.44 | 3.50 | 0.05 |
| E1 | GY | 1B | AX.89376184 | 5.89E+08 | 0.27 | -2.70 | 3.35 | 0.06 |
| E1 | GY | 1B | AX.89412388 | 5.48E+08 | 0.19 | -3.13 | 3.50 | 0.05 |
| E1 | GY | 1B | AX.89769760 | 6.15E+08 | 0.20 | -3.18 | 3.71 | 0.06 |
| E1 | GY | 1B | AX.89400603 | 5.48E+08 | 0.19 | -3.13 | 3.50 | 0.05 |
| E1 | GY | 1B | AX.89729451 | 6.14E+08 | 0.20 | -3.19 | 3.67 | 0.06 |
| E1 | GY | 1B | AX.89729451 | 6.14E+08 | 0.20 | -3.19 | 3.67 | 0.06 |
| E1 | GY | 1B | AX.89468178 | 5.89E+08 | 0.13 | -4.04 | 4.06 | 0.07 |
| E1 | GY | 1B | AX.89705262 | 6.14E+08 | 0.20 | -3.18 | 3.71 | 0.06 |
| E1 | GY | 1B | AX.89659701 | 5.63E+08 | 0.12 | -3.53 | 3.04 | 0.05 |
| E1 | GY | 1B | AX.89530034 | 5.73E+08 | 0.09 | -4.93 | 4.38 | 0.07 |
| E1 | GY | 1B | AX.89530034 | 5.73E+08 | 0.09 | -4.93 | 4.38 | 0.07 |
| E1 | GY | 1B | AX.89353327 | 6.15E+08 | 0.20 | -3.18 | 3.71 | 0.06 |
| E1 | GY | 1B | AX.89600634 | 5.93E+08 | 0.13 | -3.89 | 4.01 | 0.06 |
| E1 | GY | 1B | AX.89685826 | 5.73E+08 | 0.10 | -3.96 | 3.24 | 0.05 |
| E1 | GY | 1B | AX.89552444 | 5.43E+08 | 0.27 | -3.68 | 5.78 | 0.09 |
| E1 | GY | 1B | AX.89771478 | 6.16E+08 | 0.20 | -3.18 | 3.71 | 0.06 |
| E1 | GY | 1B | AX.89320059 | 5.95E+08 | 0.15 | -3.72 | 3.98 | 0.06 |
| E1 | GY | 1B | AX.89698290 | 5.44E+08 | 0.45 | -2.36 | 3.23 | 0.05 |
| E1 | GY | 1B | AX.89722505 | 5.71E+08 | 0.09 | -4.20 | 3.32 | 0.05 |
| E1 | GY | 1B | AX.89711094 | 6.14E+08 | 0.18 | -3.29 | 3.68 | 0.06 |
| E1 | GY | 1B | AX.89711094 | 6.14E+08 | 0.18 | -3.29 | 3.68 | 0.06 |
| E1 | GY | 1B | AX.89608342 | 5.89E+08 | 0.27 | -2.70 | 3.35 | 0.06 |
| E1 | GY | 1B | AX.89608342 | 5.89E+08 | 0.27 | -2.70 | 3.35 | 0.06 |
| E1 | GY | 1B | AX.89531457 | 6.14E+08 | 0.20 | -3.18 | 3.71 | 0.06 |
| E1 | GY | 1B | AX.89674080 | 6.54E+08 | 0.23 | -2.70 | 3.04 | 0.05 |
| E1 | GY | 1B | AX.89736403 | 5.43E+08 | 0.41 | -2.68 | 3.95 | 0.07 |
| E1 | GY | 1B | AX.89736403 | 5.43E+08 | 0.41 | -2.68 | 3.95 | 0.07 |
| E1 | GY | 1B | AX.89736664 | 5.90E+08 | 0.10 | -4.12 | 3.60 | 0.06 |
| E1 | GY | 1B | AX.89724852 | 5.94E+08 | 0.15 | -3.69 | 4.00 | 0.06 |
| E1 | GY | 1B | AX.89532430 | 4.73E+08 | 0.14 | -3.28 | 3.06 | 0.05 |
| E1 | GY | 1B | AX.89713356 | 5.72E+08 | 0.09 | -4.20 | 3.32 | 0.05 |
| E1 | GY | 1B | AX.89713356 | 5.72E+08 | 0.09 | -4.20 | 3.32 | 0.05 |
| E1 | GY | 1B | AX.89713584 | 6.15E+08 | 0.20 | -3.18 | 3.71 | 0.06 |

|    |      |    |             |          |      |          |      |      |
|----|------|----|-------------|----------|------|----------|------|------|
| E1 | GY   | 1B | AX.89775428 | 5.71E+08 | 0.09 | -4.17    | 3.28 | 0.05 |
| E1 | GY   | 1B | AX.89533661 | 6.13E+08 | 0.17 | -3.08    | 3.11 | 0.05 |
| E1 | GY   | 1B | AX.89533661 | 6.13E+08 | 0.17 | -3.08    | 3.11 | 0.05 |
| E1 | GY   | 1B | AX.89380977 | 1.78E+07 | 0.22 | -2.82    | 3.20 | 0.05 |
| E1 | GY   | 1B | AX.89710848 | 5.95E+08 | 0.14 | -3.50    | 3.50 | 0.05 |
| E1 | GY   | 1B | AX.89657160 | 5.71E+08 | 0.09 | -4.20    | 3.32 | 0.05 |
| E1 | GY   | 1B | AX.89499048 | 5.43E+08 | 0.32 | -3.09    | 4.60 | 0.08 |
| E1 | GY   | 1B | AX.89499048 | 5.43E+08 | 0.32 | -3.09    | 4.60 | 0.08 |
| E1 | GY   | 1B | AX.89524116 | 5.43E+08 | 0.42 | -2.81    | 4.32 | 0.08 |
| E1 | GY   | 1B | AX.89524116 | 5.43E+08 | 0.42 | -2.81    | 4.32 | 0.08 |
| E1 | GY   | 1B | AX.89382181 | 5.73E+08 | 0.11 | -4.47    | 4.28 | 0.07 |
| E1 | GY   | 1B | AX.89594265 | 5.76E+08 | 0.09 | -4.33    | 3.64 | 0.06 |
| E1 | GY   | 1B | AX.89764735 | 4.30E+08 | 0.39 | 2.57     | 3.60 | 0.07 |
| E1 | GY   | 1B | AX.89637605 | 5.73E+08 | 0.09 | -4.93    | 4.38 | 0.07 |
| E1 | GY   | 1B | AX.89371586 | 5.95E+08 | 0.15 | -3.47    | 3.52 | 0.05 |
| E1 | GY   | 1B | AX.89642296 | 5.72E+08 | 0.11 | -3.78    | 3.32 | 0.05 |
| E1 | GY   | 1B | AX.89756848 | 6.14E+08 | 0.20 | -3.19    | 3.67 | 0.06 |
| E1 | GY   | 1B | AX.89765557 | 6.14E+08 | 0.20 | -3.19    | 3.67 | 0.06 |
| E1 | GY   | 1B | AX.89500889 | 6.61E+08 | 0.15 | -3.12    | 3.01 | 0.04 |
| E1 | GY   | 1B | AX.89536084 | 5.46E+08 | 0.33 | -2.57    | 3.42 | 0.05 |
| E1 | GY   | 1B | AX.89490329 | 5.73E+08 | 0.08 | -4.44    | 3.50 | 0.05 |
| E1 | GY   | 1B | AX.89326749 | 5.71E+08 | 0.09 | -4.20    | 3.32 | 0.05 |
| E1 | GY   | 1B | AX.89465165 | 5.49E+08 | 0.27 | -3.07    | 4.15 | 0.06 |
| E1 | GY   | 1B | AX.89505604 | 5.92E+08 | 0.26 | -2.71    | 3.27 | 0.05 |
| E1 | GY   | 1B | AX.89655760 | 6.46E+08 | 0.07 | -4.89    | 3.58 | 0.06 |
| E1 | GY   | 1B | AX.89647569 | 5.91E+08 | 0.26 | -2.71    | 3.27 | 0.05 |
| E1 | GY   | 1B | AX.89647569 | 5.91E+08 | 0.26 | -2.71    | 3.27 | 0.05 |
| E1 | GY   | 1B | AX.89361475 | 6.14E+08 | 0.20 | -3.18    | 3.71 | 0.06 |
| E1 | GY   | 1B | AX.89361475 | 6.14E+08 | 0.20 | -3.18    | 3.71 | 0.06 |
| E1 | GY   | 1B | AX.89361588 | 5.48E+08 | 0.19 | -3.13    | 3.50 | 0.05 |
| E1 | GY   | 1B | AX.89680637 | 5.89E+08 | 0.27 | -2.70    | 3.35 | 0.06 |
| E1 | GY   | 1B | AX.89680637 | 5.89E+08 | 0.27 | -2.70    | 3.35 | 0.06 |
| E1 | GY   | 1B | AX.89572193 | 5.72E+08 | 0.09 | -4.20    | 3.32 | 0.05 |
| E1 | GY   | 1B | AX.89714488 | 5.71E+08 | 0.08 | -4.31    | 3.33 | 0.05 |
| E1 | GY   | 1B | AX.89397557 | 5.94E+08 | 0.15 | -3.69    | 4.00 | 0.06 |
| E1 | GY   | 1B | AX.89754580 | 5.49E+08 | 0.19 | -3.14    | 3.46 | 0.05 |
| E1 | GY   | 1B | AX.89754580 | 5.49E+08 | 0.19 | -3.14    | 3.46 | 0.05 |
| E1 | GY   | 1B | AX.89503677 | 6.29E+08 | 0.08 | -4.40    | 3.45 | 0.05 |
| E1 | GY   | 1B | AX.89658398 | 6.16E+08 | 0.20 | -3.18    | 3.71 | 0.06 |
| E1 | GY   | 1B | AX.89658398 | 6.16E+08 | 0.20 | -3.18    | 3.71 | 0.06 |
| E1 | GY   | 1B | AX.89399318 | 5.95E+08 | 0.15 | -3.72    | 3.98 | 0.06 |
| E1 | GY   | 1B | AX.89610191 | 5.43E+08 | 0.44 | -2.72    | 4.11 | 0.07 |
| E1 | GY   | 1B | AX.89610191 | 5.43E+08 | 0.44 | -2.72    | 4.11 | 0.07 |
| E1 | GY   | 1B | AX.89400218 | 5.49E+08 | 0.13 | -3.58    | 3.29 | 0.05 |
| E1 | GY   | 1B | AX.89540478 | 5.74E+08 | 0.09 | -4.33    | 3.64 | 0.06 |
| E1 | GPM2 | 1B | AX.89746393 | 6.62E+08 | 0.08 | -1141.05 | 3.35 | 0.05 |
| E1 | GY   | 1B | AX.89668344 | 5.71E+08 | 0.09 | -4.20    | 3.32 | 0.05 |
| E1 | GY   | 1B | AX.89668344 | 5.71E+08 | 0.09 | -4.20    | 3.32 | 0.05 |
| E1 | GPM2 | 1B | AX.89519011 | 6.53E+08 | 0.12 | -978.60  | 3.56 | 0.06 |
| E1 | GY   | 1B | AX.89660011 | 6.13E+08 | 0.14 | -3.73    | 3.91 | 0.06 |

|    |      |    |             |          |      |          |      |      |
|----|------|----|-------------|----------|------|----------|------|------|
| E1 | GPM2 | 1B | AX.89446477 | 5.71E+07 | 0.34 | -642.48  | 3.30 | 0.05 |
| E1 | GY   | 1B | AX.89611944 | 5.43E+08 | 0.46 | -2.86    | 4.52 | 0.09 |
| E1 | GY   | 1B | AX.89611944 | 5.43E+08 | 0.46 | -2.86    | 4.52 | 0.09 |
| E1 | GY   | 1B | AX.89694069 | 6.54E+08 | 0.14 | -3.31    | 3.11 | 0.06 |
| E1 | GY   | 1B | AX.89601293 | 6.14E+08 | 0.20 | -3.19    | 3.67 | 0.06 |
| E1 | GY   | 1B | AX.89734677 | 5.48E+08 | 0.19 | -3.13    | 3.50 | 0.05 |
| E1 | GPM2 | 1B | AX.89579570 | 6.55E+08 | 0.08 | -1073.58 | 3.02 | 0.05 |
| E1 | GY   | 1B | AX.89552029 | 4.30E+08 | 0.38 | 2.47     | 3.37 | 0.06 |
| E1 | GY   | 1B | AX.89402330 | 5.93E+08 | 0.13 | -3.89    | 4.01 | 0.06 |
| E1 | GPM2 | 1B | AX.89459113 | 5.63E+08 | 0.48 | -616.75  | 3.36 | 0.05 |
| E1 | GPM2 | 1B | AX.89378009 | 4.84E+08 | 0.19 | 807.71   | 3.47 | 0.05 |
| E1 | GPM2 | 1B | AX.89586724 | 6.55E+08 | 0.08 | -1073.58 | 3.02 | 0.05 |
| E1 | GPM2 | 1B | AX.89668519 | 6.52E+08 | 0.12 | -978.60  | 3.56 | 0.06 |
| E1 | GPM2 | 1B | AX.89654461 | 6.54E+08 | 0.11 | -1028.45 | 3.65 | 0.06 |
| E1 | GPM2 | 1B | AX.89569221 | 4.96E+08 | 0.17 | -793.84  | 3.20 | 0.06 |
| E1 | GY   | 1B | AX.89735790 | 5.71E+08 | 0.09 | -4.20    | 3.32 | 0.05 |
| E1 | GY   | 1B | AX.89735790 | 5.71E+08 | 0.09 | -4.20    | 3.32 | 0.05 |
| E1 | GY   | 1B | AX.89602399 | 5.72E+08 | 0.09 | -4.20    | 3.32 | 0.05 |
| E1 | GY   | 1B | AX.89674080 | 6.54E+08 | 0.23 | -2.70    | 3.04 | 0.05 |
| E1 | GY   | 1B | AX.89367256 | 5.91E+08 | 0.27 | -2.80    | 3.54 | 0.06 |
| E1 | GPM2 | 1B | AX.89384638 | 6.52E+08 | 0.12 | -979.71  | 3.47 | 0.06 |
| E1 | GY   | 1B | AX.89566210 | 5.62E+08 | 0.29 | -2.70    | 3.47 | 0.05 |
| E1 | GY   | 1B | AX.89411589 | 5.66E+08 | 0.16 | -3.04    | 3.00 | 0.04 |
| E1 | GPM2 | 1B | AX.89546727 | 6.62E+08 | 0.08 | -1141.05 | 3.35 | 0.05 |
| E1 | GY   | 1B | AX.89646690 | 5.96E+08 | 0.15 | -3.72    | 3.98 | 0.06 |
| E1 | GY   | 1B | AX.89646690 | 5.96E+08 | 0.15 | -3.72    | 3.98 | 0.06 |
| E1 | GY   | 1B | AX.89333321 | 5.50E+08 | 0.26 | -3.07    | 4.11 | 0.06 |
| E1 | GY   | 1B | AX.89713215 | 5.48E+08 | 0.19 | -3.13    | 3.50 | 0.05 |
| E1 | GPM2 | 1B | AX.89341022 | 4.84E+08 | 0.19 | 807.71   | 3.47 | 0.05 |
| E1 | GY   | 1B | AX.89428761 | 5.44E+08 | 0.45 | -2.36    | 3.23 | 0.05 |
| E1 | GPM2 | 1B | AX.89772593 | 5.33E+07 | 0.29 | -646.83  | 3.08 | 0.05 |
| E1 | GPM2 | 1B | AX.89321187 | 6.61E+08 | 0.09 | -1080.74 | 3.46 | 0.06 |
| E1 | GY   | 1B | AX.89771477 | 6.15E+08 | 0.20 | -3.18    | 3.71 | 0.06 |
| E1 | GY   | 1B | AX.89357479 | 5.43E+08 | 0.45 | -2.57    | 3.73 | 0.06 |
| E1 | GY   | 1B | AX.89632144 | 5.90E+08 | 0.25 | -2.74    | 3.27 | 0.05 |
| E1 | GY   | 1B | AX.89726996 | 6.15E+08 | 0.20 | -3.18    | 3.71 | 0.06 |
| E1 | GY   | 1B | AX.89726996 | 6.15E+08 | 0.20 | -3.18    | 3.71 | 0.06 |
| E1 | GY   | 1B | AX.89605104 | 5.76E+08 | 0.09 | -4.33    | 3.64 | 0.06 |
| E1 | GPM2 | 1B | AX.89774524 | 4.85E+08 | 0.19 | 807.71   | 3.47 | 0.05 |
| E1 | GY   | 1B | AX.89690662 | 5.94E+08 | 0.15 | -3.47    | 3.52 | 0.05 |
| E1 | GPM2 | 1B | AX.89756912 | 4.74E+08 | 0.14 | -942.17  | 3.70 | 0.07 |
| E1 | GY   | 1B | AX.89580989 | 6.46E+08 | 0.07 | -4.89    | 3.58 | 0.06 |
| E1 | GY   | 1B | AX.89430295 | 6.54E+08 | 0.13 | -3.54    | 3.23 | 0.06 |
| E1 | GY   | 1B | AX.89546341 | 5.94E+08 | 0.15 | -3.69    | 4.00 | 0.06 |
| E1 | GY   | 1B | AX.89441819 | 5.89E+08 | 0.27 | -2.70    | 3.35 | 0.06 |
| E1 | GY   | 1B | AX.89503576 | 5.71E+08 | 0.09 | -4.02    | 3.20 | 0.05 |
| E1 | GY   | 1B | AX.89728608 | 5.43E+08 | 0.41 | -2.57    | 3.68 | 0.06 |
| E1 | GPM2 | 1B | AX.89430464 | 5.49E+07 | 0.16 | -849.20  | 3.39 | 0.05 |
| E1 | GY   | 1B | AX.89618457 | 5.43E+08 | 0.40 | -2.46    | 3.39 | 0.06 |
| E1 | GY   | 1B | AX.89618457 | 5.43E+08 | 0.40 | -2.46    | 3.39 | 0.06 |

|    |      |    |             |          |      |          |      |      |
|----|------|----|-------------|----------|------|----------|------|------|
| E1 | GY   | 1B | AX.89407855 | 5.43E+08 | 0.44 | -2.82    | 4.39 | 0.08 |
| E1 | GY   | 1B | AX.89407855 | 5.43E+08 | 0.44 | -2.82    | 4.39 | 0.08 |
| E1 | GPM2 | 1B | AX.89598991 | 6.61E+08 | 0.15 | -820.92  | 3.13 | 0.05 |
| E1 | GPM2 | 1B | AX.89699158 | 4.85E+08 | 0.19 | 807.71   | 3.47 | 0.05 |
| E1 | GY   | 1B | AX.89679490 | 5.73E+08 | 0.08 | -4.44    | 3.50 | 0.05 |
| E1 | GPM2 | 1B | AX.89372089 | 6.62E+08 | 0.08 | -1141.05 | 3.35 | 0.05 |
| E1 | GY   | 1B | AX.89645388 | 5.90E+08 | 0.25 | -2.74    | 3.27 | 0.05 |
| E1 | GPM2 | 1B | AX.89655654 | 6.62E+08 | 0.08 | -1141.05 | 3.35 | 0.05 |
| E1 | GY   | 1B | AX.89756650 | 6.14E+08 | 0.20 | -3.18    | 3.71 | 0.06 |
| E1 | GY   | 1B | AX.89465484 | 5.50E+08 | 0.26 | -3.07    | 4.11 | 0.06 |
| E1 | GPM2 | 1B | AX.89422777 | 6.55E+08 | 0.08 | -1073.58 | 3.02 | 0.05 |
| E1 | GPM2 | 1B | AX.89316355 | 6.52E+08 | 0.12 | -978.60  | 3.56 | 0.06 |
| E1 | GY   | 1B | AX.89443701 | 6.15E+08 | 0.20 | -3.18    | 3.71 | 0.06 |
| E1 | GY   | 1B | AX.89749378 | 6.32E+08 | 0.08 | -4.54    | 3.63 | 0.06 |
| E1 | GPM2 | 1B | AX.89332715 | 6.54E+08 | 0.12 | -978.60  | 3.56 | 0.06 |
| E1 | GY   | 1B | AX.89680746 | 6.14E+08 | 0.20 | -3.18    | 3.71 | 0.06 |
| E1 | GY   | 1B | AX.89680746 | 6.14E+08 | 0.20 | -3.18    | 3.71 | 0.06 |
| E1 | GPM2 | 1B | AX.89465453 | 5.48E+07 | 0.16 | -849.20  | 3.39 | 0.05 |
| E1 | GPM2 | 1B | AX.89375527 | 6.61E+08 | 0.09 | -1080.74 | 3.46 | 0.06 |
| E1 | GY   | 1B | AX.89537771 | 5.48E+08 | 0.19 | -3.13    | 3.50 | 0.05 |
| E1 | GPM2 | 1B | AX.89313994 | 5.63E+07 | 0.28 | -673.00  | 3.27 | 0.05 |
| E1 | GY   | 1B | AX.89479897 | 5.96E+08 | 0.15 | -3.72    | 3.98 | 0.06 |
| E1 | GPM2 | 1B | AX.89344904 | 6.59E+08 | 0.09 | -1080.74 | 3.46 | 0.06 |
| E1 | GY   | 1B | AX.89516076 | 5.50E+08 | 0.26 | -3.07    | 4.11 | 0.06 |
| E1 | GY   | 1B | AX.89375029 | 5.89E+08 | 0.27 | -2.70    | 3.35 | 0.06 |
| E1 | GY   | 1B | AX.89680841 | 5.43E+08 | 0.25 | -3.71    | 5.55 | 0.09 |
| E1 | GY   | 1B | AX.89606726 | 4.45E+07 | 0.44 | -2.44    | 3.42 | 0.06 |
| E1 | GY   | 1B | AX.89606726 | 4.45E+07 | 0.44 | -2.44    | 3.42 | 0.06 |
| E1 | GPM2 | 1B | AX.89393822 | 5.63E+07 | 0.29 | -635.47  | 3.01 | 0.05 |
| E1 | GY   | 1B | AX.89364192 | 6.14E+08 | 0.20 | -3.18    | 3.71 | 0.06 |
| E1 | GY   | 1B | AX.89364192 | 6.14E+08 | 0.20 | -3.18    | 3.71 | 0.06 |
| E1 | GY   | 1B | AX.89421818 | 4.72E+08 | 0.14 | -3.56    | 3.51 | 0.06 |
| E1 | GY   | 1B | AX.89622088 | 5.91E+08 | 0.25 | -2.69    | 3.20 | 0.05 |
| E1 | GY   | 1B | AX.89490318 | 6.14E+08 | 0.20 | -3.26    | 3.83 | 0.06 |
| E1 | GPM2 | 1B | AX.89650893 | 5.46E+07 | 0.15 | -948.76  | 3.93 | 0.06 |
| E1 | GY   | 1B | AX.89341296 | 6.54E+08 | 0.14 | -3.31    | 3.11 | 0.06 |
| E1 | GPM2 | 1B | AX.89644951 | 1.42E+07 | 0.20 | -799.36  | 3.63 | 0.06 |
| E1 | GY   | 1B | AX.86166370 | 6.15E+08 | 0.20 | -3.18    | 3.71 | 0.06 |
| E1 | GY   | 1B | AX.89659895 | 6.14E+08 | 0.20 | -3.19    | 3.67 | 0.06 |
| E1 | GPM2 | 1B | AX.89536942 | 6.55E+08 | 0.08 | -1073.58 | 3.02 | 0.05 |
| E1 | GPM2 | 1B | AX.89626512 | 4.60E+08 | 0.40 | 601.27   | 3.12 | 0.05 |
| E1 | GPM2 | 1B | AX.89466921 | 5.58E+07 | 0.16 | -849.20  | 3.39 | 0.05 |
| E1 | GPM2 | 1B | AX.89429501 | 6.54E+08 | 0.12 | -978.60  | 3.56 | 0.06 |
| E1 | GPM2 | 1B | AX.89666109 | 6.62E+08 | 0.08 | -1193.59 | 3.79 | 0.06 |
| E1 | GPM2 | 1B | AX.89381763 | 5.70E+07 | 0.27 | -654.24  | 3.06 | 0.05 |
| E1 | GPM2 | 1B | AX.89663520 | 6.54E+08 | 0.11 | -1028.45 | 3.65 | 0.06 |
| E1 | GPM2 | 1B | AX.89500077 | 4.73E+08 | 0.14 | -837.68  | 3.10 | 0.05 |
| E1 | GPM2 | 1B | AX.89666869 | 6.52E+08 | 0.12 | -978.60  | 3.56 | 0.06 |
| E1 | GPM2 | 1B | AX.89460476 | 6.53E+08 | 0.11 | -1028.45 | 3.65 | 0.06 |
| E1 | GPM2 | 1B | AX.89500359 | 6.53E+08 | 0.11 | -1028.45 | 3.65 | 0.06 |

|    |      |    |             |          |      |          |      |      |
|----|------|----|-------------|----------|------|----------|------|------|
| E1 | GY   | 1B | AX.89619733 | 6.15E+08 | 0.20 | -3.18    | 3.71 | 0.06 |
| E1 | GY   | 1B | AX.89619733 | 6.15E+08 | 0.20 | -3.18    | 3.71 | 0.06 |
| E1 | GY   | 1B | AX.89577198 | 5.89E+08 | 0.27 | -2.70    | 3.35 | 0.06 |
| E1 | GY   | 1B | AX.89585539 | 6.14E+08 | 0.20 | -3.18    | 3.71 | 0.06 |
| E1 | GY   | 1B | AX.89590119 | 5.63E+08 | 0.12 | -3.53    | 3.04 | 0.05 |
| E1 | GPM2 | 1B | AX.89384887 | 4.87E+08 | 0.19 | 807.71   | 3.47 | 0.05 |
| E1 | GPM2 | 1B | AX.89424518 | 4.84E+08 | 0.19 | 807.71   | 3.47 | 0.05 |
| E1 | GY   | 1B | AX.89755321 | 6.14E+08 | 0.20 | -3.19    | 3.67 | 0.06 |
| E1 | GPM2 | 1B | AX.89316675 | 6.53E+08 | 0.12 | -978.60  | 3.56 | 0.06 |
| E1 | GPM2 | 1B | AX.89356982 | 6.54E+08 | 0.13 | -1079.82 | 4.35 | 0.08 |
| E1 | GY   | 1B | AX.89675132 | 5.71E+08 | 0.09 | -4.20    | 3.32 | 0.05 |
| E1 | GY   | 1B | AX.89580727 | 5.96E+08 | 0.15 | -3.72    | 3.98 | 0.06 |
| E1 | GPM2 | 1B | AX.89721228 | 6.62E+08 | 0.08 | -1141.05 | 3.35 | 0.05 |
| E1 | GPM2 | 1B | AX.89516042 | 6.53E+08 | 0.12 | -978.60  | 3.56 | 0.06 |
| E1 | GPM2 | 1B | AX.89513911 | 4.84E+08 | 0.19 | 807.71   | 3.47 | 0.05 |
| E1 | GY   | 1B | AX.89672607 | 5.93E+08 | 0.30 | -2.66    | 3.46 | 0.06 |
| E1 | GPM2 | 1B | AX.89532392 | 5.55E+07 | 0.16 | -934.78  | 4.00 | 0.07 |
| E1 | GPM2 | 1B | AX.89580989 | 6.46E+08 | 0.07 | -1386.81 | 4.25 | 0.07 |
| E1 | GY   | 1B | AX.89635603 | 5.94E+08 | 0.15 | -3.47    | 3.52 | 0.05 |
| E1 | GPM2 | 1B | AX.89624854 | 6.53E+08 | 0.12 | -978.60  | 3.56 | 0.06 |
| E1 | GPM2 | 1B | AX.89430295 | 6.54E+08 | 0.13 | -1079.82 | 4.35 | 0.08 |
| E1 | GPM2 | 1B | AX.89328659 | 4.73E+08 | 0.15 | -823.32  | 3.08 | 0.05 |
| E1 | GPM2 | 1B | AX.89669649 | 4.92E+08 | 0.17 | -793.84  | 3.20 | 0.06 |
| E1 | GY   | 1B | AX.89381273 | 6.15E+08 | 0.20 | -3.18    | 3.71 | 0.06 |
| E1 | GY   | 1B | AX.89566816 | 5.48E+08 | 0.19 | -3.13    | 3.50 | 0.05 |
| E1 | GY   | 1B | AX.89566816 | 5.48E+08 | 0.19 | -3.13    | 3.50 | 0.05 |
| E1 | GY   | 1B | AX.89743657 | 5.45E+08 | 0.33 | -2.57    | 3.42 | 0.05 |
| E1 | GY   | 1B | AX.89743657 | 5.45E+08 | 0.33 | -2.57    | 3.42 | 0.05 |
| E1 | GY   | 1B | AX.89417724 | 5.94E+08 | 0.15 | -3.47    | 3.52 | 0.05 |
| E1 | GPM2 | 1B | AX.89655162 | 6.54E+08 | 0.12 | -978.60  | 3.56 | 0.06 |
| E1 | GPM2 | 1B | AX.89511165 | 6.62E+08 | 0.08 | -1141.05 | 3.35 | 0.05 |
| E1 | GPM2 | 1B | AX.89704754 | 5.49E+07 | 0.35 | -649.74  | 3.38 | 0.05 |
| E1 | GY   | 1B | AX.89686858 | 6.13E+08 | 0.14 | -3.73    | 3.91 | 0.06 |
| E1 | GPM2 | 1B | AX.89597283 | 6.61E+08 | 0.09 | -1080.74 | 3.46 | 0.06 |
| E1 | GPM2 | 1B | AX.89425103 | 6.53E+08 | 0.11 | -1028.45 | 3.65 | 0.06 |
| E1 | GY   | 1B | AX.89637605 | 5.73E+08 | 0.09 | -4.93    | 4.38 | 0.07 |
| E1 | GPM2 | 1B | AX.89629185 | 6.53E+08 | 0.12 | -978.60  | 3.56 | 0.06 |
| E1 | GY   | 1B | AX.89431355 | 6.14E+08 | 0.20 | -3.19    | 3.67 | 0.06 |
| E1 | GPM2 | 1B | AX.89581662 | 6.52E+08 | 0.11 | -1028.45 | 3.65 | 0.06 |
| E1 | GPM2 | 1B | AX.89416093 | 6.62E+08 | 0.08 | -1141.05 | 3.35 | 0.05 |
| E1 | GY   | 1B | AX.89525338 | 5.73E+08 | 0.08 | -4.58    | 3.53 | 0.06 |
| E1 | GPM2 | 1B | AX.89536335 | 6.52E+08 | 0.12 | -910.13  | 3.15 | 0.05 |
| E1 | GY   | 1B | AX.89454201 | 6.15E+08 | 0.20 | -3.18    | 3.71 | 0.06 |
| E1 | GY   | 1B | AX.89383439 | 6.14E+08 | 0.20 | -3.19    | 3.67 | 0.06 |
| E1 | GPM2 | 1B | AX.89428153 | 5.54E+07 | 0.15 | -894.90  | 3.63 | 0.06 |
| E1 | GY   | 1B | AX.89756650 | 6.14E+08 | 0.20 | -3.18    | 3.71 | 0.06 |
| E1 | GY   | 1B | AX.89751221 | 5.32E+08 | 0.20 | -3.18    | 3.65 | 0.06 |
| E1 | GY   | 1B | AX.89432547 | 5.73E+08 | 0.08 | -4.44    | 3.50 | 0.05 |
| E1 | GY   | 1B | AX.89373054 | 6.15E+08 | 0.20 | -3.14    | 3.64 | 0.06 |
| E1 | GY   | 1B | AX.89596159 | 5.90E+08 | 0.26 | -2.63    | 3.14 | 0.05 |

|    |      |    |             |          |      |          |      |      |
|----|------|----|-------------|----------|------|----------|------|------|
| E1 | GPM2 | 1B | AX.89601532 | 6.53E+08 | 0.12 | -978.60  | 3.56 | 0.06 |
| E1 | GY   | 1B | AX.89765713 | 6.21E+08 | 0.19 | -3.20    | 3.64 | 0.06 |
| E1 | GY   | 1B | AX.89596373 | 5.62E+08 | 0.28 | -2.83    | 3.73 | 0.06 |
| E1 | GY   | 1B | AX.89454941 | 4.30E+08 | 0.39 | 2.57     | 3.60 | 0.07 |
| E1 | GY   | 1B | AX.89627039 | 5.71E+08 | 0.15 | -3.40    | 3.40 | 0.05 |
| E1 | GPM2 | 1B | AX.89323974 | 5.39E+07 | 0.16 | -799.94  | 3.12 | 0.05 |
| E1 | GY   | 1B | AX.89462493 | 5.95E+08 | 0.15 | -3.47    | 3.52 | 0.05 |
| E1 | GPM2 | 1B | AX.89468035 | 6.52E+08 | 0.12 | -978.60  | 3.56 | 0.06 |
| E1 | GPM2 | 1B | AX.89633505 | 5.27E+07 | 0.49 | -594.29  | 3.15 | 0.05 |
| E1 | GPM2 | 1B | AX.89655760 | 6.46E+08 | 0.07 | -1386.81 | 4.25 | 0.07 |
| E1 | GY   | 1B | AX.89706711 | 6.15E+08 | 0.20 | -3.18    | 3.71 | 0.06 |
| E1 | GPM2 | 1B | AX.89472332 | 6.53E+08 | 0.11 | -955.19  | 3.12 | 0.05 |
| E1 | GPM2 | 1B | AX.89494116 | 6.61E+08 | 0.09 | -1080.74 | 3.46 | 0.06 |
| E1 | GPM2 | 1B | AX.89611811 | 5.41E+07 | 0.16 | -849.20  | 3.39 | 0.05 |
| E1 | GPM2 | 1B | AX.89643801 | 6.53E+08 | 0.11 | -1028.45 | 3.65 | 0.06 |
| E1 | GY   | 1B | AX.89720333 | 5.44E+08 | 0.45 | -2.36    | 3.23 | 0.05 |
| E1 | GPM2 | 1B | AX.89694069 | 6.54E+08 | 0.14 | -1059.20 | 4.54 | 0.08 |
| E1 | GPM2 | 1B | AX.89583474 | 5.55E+07 | 0.15 | -839.65  | 3.25 | 0.05 |
| E1 | GPM2 | 1B | AX.89527090 | 6.59E+08 | 0.09 | -1080.74 | 3.46 | 0.06 |
| E1 | GY   | 1B | AX.89674825 | 5.71E+08 | 0.09 | -4.20    | 3.32 | 0.05 |
| E1 | GY   | 1B | AX.89674825 | 5.71E+08 | 0.09 | -4.20    | 3.32 | 0.05 |
| E1 | GPM2 | 1B | AX.89426322 | 6.52E+08 | 0.11 | -1028.45 | 3.65 | 0.06 |
| E1 | GPM2 | 1B | AX.89639580 | 4.84E+08 | 0.19 | 807.71   | 3.47 | 0.05 |
| E1 | GY   | 1B | AX.89708163 | 5.48E+08 | 0.19 | -3.13    | 3.50 | 0.05 |
| E1 | GPM2 | 1B | AX.89557675 | 6.52E+08 | 0.13 | -935.39  | 3.39 | 0.05 |
| E1 | GPM2 | 1B | AX.89765882 | 6.46E+08 | 0.07 | -1386.81 | 4.25 | 0.07 |
| E1 | GY   | 1B | AX.89625060 | 5.50E+08 | 0.13 | -3.47    | 3.13 | 0.05 |
| E1 | GY   | 1B | AX.89386960 | 5.73E+08 | 0.08 | -4.44    | 3.50 | 0.05 |
| E1 | GPM2 | 1B | AX.89720405 | 6.54E+08 | 0.12 | -978.60  | 3.56 | 0.06 |
| E1 | GPM2 | 1B | AX.89415657 | 6.32E+08 | 0.07 | -1287.03 | 3.53 | 0.06 |
| E1 | GPM2 | 1B | AX.89457977 | 4.74E+08 | 0.14 | -837.68  | 3.10 | 0.05 |
| E1 | GPM2 | 1B | AX.89722366 | 4.83E+08 | 0.19 | 767.15   | 3.23 | 0.05 |
| E1 | GY   | 1B | AX.89659701 | 5.63E+08 | 0.12 | -3.53    | 3.04 | 0.05 |
| E1 | GY   | 1B | AX.89759919 | 5.90E+08 | 0.27 | -2.69    | 3.30 | 0.06 |
| E1 | GPM2 | 1B | AX.89560184 | 6.60E+08 | 0.09 | -1080.74 | 3.46 | 0.06 |
| E1 | GY   | 1B | AX.89353327 | 6.15E+08 | 0.20 | -3.18    | 3.71 | 0.06 |
| E1 | GY   | 1B | AX.89685826 | 5.73E+08 | 0.10 | -3.96    | 3.24 | 0.05 |
| E1 | GPM2 | 1B | AX.89717173 | 6.52E+08 | 0.12 | -1050.54 | 3.91 | 0.06 |
| E1 | GY   | 1B | AX.89746518 | 5.32E+08 | 0.20 | -3.17    | 3.68 | 0.06 |
| E1 | GY   | 1B | AX.89746518 | 5.32E+08 | 0.20 | -3.17    | 3.68 | 0.06 |
| E1 | GY   | 1B | AX.89722505 | 5.71E+08 | 0.09 | -4.20    | 3.32 | 0.05 |
| E1 | GPM2 | 1B | AX.89378367 | 6.53E+08 | 0.11 | -1028.45 | 3.65 | 0.06 |
| E1 | GY   | 1B | AX.89553218 | 5.62E+08 | 0.28 | -2.67    | 3.38 | 0.05 |
| E1 | GPM2 | 1B | AX.89731113 | 5.33E+07 | 0.16 | -849.20  | 3.39 | 0.05 |
| E1 | GPM2 | 1B | AX.89321736 | 6.55E+08 | 0.08 | -1073.58 | 3.02 | 0.05 |
| E1 | GPM2 | 1B | AX.89615276 | 4.84E+08 | 0.19 | 807.71   | 3.47 | 0.05 |
| E1 | GPM2 | 1B | AX.89410975 | 6.55E+08 | 0.08 | -1073.58 | 3.02 | 0.05 |
| E1 | GPM2 | 1B | AX.89547196 | 6.53E+08 | 0.12 | -978.60  | 3.56 | 0.06 |
| E1 | GPM2 | 1B | AX.89628976 | 6.59E+08 | 0.09 | -1080.74 | 3.46 | 0.06 |
| E1 | GPM2 | 1B | AX.89449919 | 6.59E+08 | 0.09 | -1080.74 | 3.46 | 0.06 |

|    |      |    |             |          |      |          |      |      |
|----|------|----|-------------|----------|------|----------|------|------|
| E1 | GY   | 1B | AX.89532430 | 4.73E+08 | 0.14 | -3.28    | 3.06 | 0.05 |
| E1 | GY   | 1B | AX.89568217 | 5.89E+08 | 0.13 | -4.04    | 4.06 | 0.07 |
| E1 | GY   | 1B | AX.89605272 | 6.16E+08 | 0.20 | -3.18    | 3.71 | 0.06 |
| E1 | GY   | 1B | AX.89430167 | 5.71E+08 | 0.08 | -4.16    | 3.00 | 0.05 |
| E1 | GY   | 1B | AX.89382181 | 5.73E+08 | 0.11 | -4.47    | 4.28 | 0.07 |
| E1 | GY   | 1B | AX.89760457 | 5.90E+08 | 0.25 | -2.69    | 3.20 | 0.05 |
| E1 | GY   | 1B | AX.89703958 | 6.15E+08 | 0.20 | -3.18    | 3.71 | 0.06 |
| E1 | GY   | 1B | AX.89642296 | 5.72E+08 | 0.11 | -3.78    | 3.32 | 0.05 |
| E1 | GY   | 1B | AX.89679490 | 5.73E+08 | 0.08 | -4.44    | 3.50 | 0.05 |
| E1 | GY   | 1B | AX.89465482 | 5.43E+08 | 0.41 | -2.68    | 3.95 | 0.07 |
| E1 | GY   | 1B | AX.89327316 | 5.95E+08 | 0.15 | -3.72    | 3.98 | 0.06 |
| E1 | GY   | 1B | AX.89361485 | 6.15E+08 | 0.20 | -3.18    | 3.71 | 0.06 |
| E1 | GY   | 1B | AX.89594022 | 6.14E+08 | 0.21 | -3.21    | 3.94 | 0.06 |
| E1 | GY   | 1B | AX.89594022 | 6.14E+08 | 0.21 | -3.21    | 3.94 | 0.06 |
| E1 | GY   | 1B | AX.89683293 | 5.71E+08 | 0.09 | -4.20    | 3.32 | 0.05 |
| E1 | GY   | 1B | AX.89721599 | 5.94E+08 | 0.15 | -3.72    | 3.98 | 0.06 |
| E1 | GY   | 1B | AX.89721858 | 5.89E+08 | 0.13 | -4.04    | 4.06 | 0.07 |
| E1 | GY   | 1B | AX.89647056 | 5.43E+08 | 0.46 | -2.72    | 4.15 | 0.08 |
| E1 | GY   | 1B | AX.89525700 | 5.91E+08 | 0.26 | -2.63    | 3.14 | 0.05 |
| E1 | GPM2 | 1B | AX.89380977 | 1.78E+07 | 0.22 | -733.12  | 3.26 | 0.06 |
| E1 | GY   | 1B | AX.89770837 | 5.43E+08 | 0.44 | -2.72    | 4.11 | 0.07 |
| E1 | GPM2 | 1B | AX.89387732 | 4.86E+08 | 0.19 | 807.71   | 3.47 | 0.05 |
| E1 | GPM2 | 1B | AX.89407680 | 6.61E+08 | 0.16 | -801.79  | 3.07 | 0.05 |
| E1 | GPM2 | 1B | AX.89491622 | 6.61E+08 | 0.15 | -820.92  | 3.13 | 0.05 |
| E1 | GPM2 | 1B | AX.89441161 | 4.86E+08 | 0.20 | 762.45   | 3.34 | 0.05 |
| E1 | GPM2 | 1B | AX.89451610 | 6.59E+08 | 0.09 | -1080.74 | 3.46 | 0.06 |
| E1 | GY   | 1B | AX.89686897 | 4.30E+08 | 0.39 | 2.58     | 3.65 | 0.07 |
| E1 | GPM2 | 1B | AX.89654829 | 5.66E+08 | 0.05 | -1436.26 | 3.25 | 0.06 |
| E1 | GY   | 1B | AX.89566210 | 5.62E+08 | 0.29 | -2.70    | 3.47 | 0.05 |
| E1 | GY   | 1B | AX.89504471 | 5.95E+08 | 0.15 | -3.69    | 4.00 | 0.06 |
| E1 | GPM2 | 1B | AX.89528405 | 5.89E+08 | 0.12 | -910.17  | 3.15 | 0.06 |
| E1 | GY   | 1B | AX.89543383 | 5.94E+08 | 0.15 | -3.47    | 3.52 | 0.05 |
| E1 | GPM2 | 1B | AX.89550567 | 6.59E+08 | 0.09 | -1080.74 | 3.46 | 0.06 |
| E1 | GPM2 | 1B | AX.89470764 | 6.53E+08 | 0.11 | -1028.45 | 3.65 | 0.06 |
| E1 | GPM2 | 1B | AX.89336137 | 4.85E+08 | 0.16 | 803.34   | 3.08 | 0.05 |
| E1 | GPM2 | 1B | AX.89493476 | 5.26E+07 | 0.49 | -639.51  | 3.57 | 0.05 |
| E1 | GPM2 | 1B | AX.89512032 | 6.54E+08 | 0.16 | -810.67  | 3.13 | 0.05 |
| E1 | GPM2 | 1B | AX.89601546 | 4.84E+08 | 0.27 | 672.45   | 3.15 | 0.06 |
| E1 | GPM2 | 1B | AX.89670448 | 6.53E+08 | 0.11 | -1028.45 | 3.65 | 0.06 |
| E1 | GPM2 | 1B | AX.89665864 | 6.55E+08 | 0.08 | -1073.58 | 3.02 | 0.05 |
| E1 | GY   | 1B | AX.89657160 | 5.71E+08 | 0.09 | -4.20    | 3.32 | 0.05 |
| E1 | GY   | 1B | AX.89463084 | 6.14E+08 | 0.20 | -3.19    | 3.67 | 0.06 |
| E1 | GPM2 | 1B | AX.89494755 | 6.62E+08 | 0.05 | -1709.59 | 4.76 | 0.08 |
| E1 | GPM2 | 1B | AX.89766983 | 4.86E+08 | 0.19 | 855.75   | 3.90 | 0.06 |
| E1 | GY   | 1B | AX.89500077 | 4.73E+08 | 0.14 | -3.52    | 3.53 | 0.06 |
| E1 | GPM2 | 1B | AX.89664371 | 6.52E+08 | 0.13 | -935.39  | 3.39 | 0.05 |
| E1 | GPM2 | 1B | AX.89776496 | 5.49E+07 | 0.16 | -849.20  | 3.39 | 0.05 |
| E1 | GY   | 1B | AX.89371586 | 5.95E+08 | 0.15 | -3.47    | 3.52 | 0.05 |
| E1 | GY   | 1B | AX.89503576 | 5.71E+08 | 0.09 | -4.02    | 3.20 | 0.05 |
| E1 | GY   | 1B | AX.89728608 | 5.43E+08 | 0.41 | -2.57    | 3.68 | 0.06 |



|    |      |    |             |          |      |          |      |      |
|----|------|----|-------------|----------|------|----------|------|------|
| E1 | GY   | 1B | AX.89372056 | 5.96E+08 | 0.15 | -3.72    | 3.98 | 0.06 |
| E1 | GPM2 | 1B | AX.89442346 | 6.54E+08 | 0.12 | -978.60  | 3.56 | 0.06 |
| E1 | GY   | 1B | AX.89645388 | 5.90E+08 | 0.25 | -2.74    | 3.27 | 0.05 |
| E1 | GPM2 | 1B | AX.89341296 | 6.54E+08 | 0.14 | -1059.20 | 4.54 | 0.08 |
| E1 | GPM2 | 1B | AX.89387997 | 5.53E+07 | 0.16 | -849.20  | 3.39 | 0.05 |
| E1 | GY   | 1B | AX.89419135 | 4.29E+08 | 0.38 | 2.49     | 3.40 | 0.06 |
| E1 | GY   | 1B | AX.89583603 | 6.13E+08 | 0.14 | -3.73    | 3.91 | 0.06 |
| E1 | GPM2 | 1B | AX.89515980 | 5.65E+08 | 0.05 | -1436.26 | 3.25 | 0.06 |
| E1 | GPM2 | 1B | AX.89584833 | 5.49E+07 | 0.16 | -849.20  | 3.39 | 0.05 |
| E1 | GPM2 | 1B | AX.89640880 | 6.59E+08 | 0.09 | -1080.74 | 3.46 | 0.06 |
| E1 | GPM2 | 1B | AX.89524034 | 6.46E+08 | 0.07 | -1386.81 | 4.25 | 0.07 |
| E1 | GPM2 | 1B | AX.89468290 | 4.85E+08 | 0.19 | 767.15   | 3.23 | 0.05 |
| E1 | GPM2 | 1B | AX.89534404 | 6.54E+08 | 0.22 | -706.48  | 3.10 | 0.05 |
| E1 | GPM2 | 1B | AX.89407995 | 6.55E+08 | 0.08 | -1073.58 | 3.02 | 0.05 |
| E1 | GPM2 | 1B | AX.89469915 | 6.60E+08 | 0.10 | -984.82  | 3.07 | 0.05 |
| E1 | GPM2 | 1B | AX.89345423 | 4.85E+08 | 0.19 | 807.71   | 3.47 | 0.05 |
| E1 | GPM2 | 1B | AX.89516168 | 6.59E+08 | 0.09 | -1080.74 | 3.46 | 0.06 |
| E1 | GY   | 1B | AX.89549904 | 5.90E+08 | 0.26 | -2.63    | 3.13 | 0.05 |
| E1 | GY   | 1B | AX.89549904 | 5.90E+08 | 0.26 | -2.63    | 3.13 | 0.05 |
| E1 | GPM2 | 1B | AX.89433914 | 4.85E+08 | 0.19 | 767.15   | 3.23 | 0.05 |
| E1 | GPM2 | 1B | AX.89426263 | 5.58E+07 | 0.16 | -849.20  | 3.39 | 0.05 |
| E1 | GPM2 | 1B | AX.89337283 | 5.49E+07 | 0.16 | -823.48  | 3.28 | 0.06 |
| E1 | GPM2 | 1B | AX.89679175 | 4.86E+08 | 0.19 | 807.71   | 3.47 | 0.05 |
| E1 | GPM2 | 1B | AX.89536040 | 4.73E+08 | 0.14 | -837.68  | 3.10 | 0.05 |
| E1 | GPM2 | 1B | AX.89396197 | 6.53E+08 | 0.11 | -1028.45 | 3.65 | 0.06 |
| E1 | GPM2 | 1B | AX.89356974 | 5.53E+07 | 0.15 | -887.39  | 3.58 | 0.06 |
| E1 | GPM2 | 1B | AX.89335520 | 6.54E+08 | 0.08 | -1073.58 | 3.02 | 0.05 |
| E1 | GPM2 | 1B | AX.89409179 | 4.73E+08 | 0.14 | -837.68  | 3.10 | 0.05 |
| E1 | GPM2 | 1B | AX.89331198 | 5.64E+08 | 0.05 | -1384.93 | 3.30 | 0.06 |
| E1 | GY   | 1B | AX.89436079 | 6.15E+08 | 0.17 | -3.09    | 3.14 | 0.05 |
| E1 | GPM2 | 1B | AX.89712984 | 6.53E+08 | 0.12 | -978.60  | 3.56 | 0.06 |
| E1 | GPM2 | 1B | AX.89713014 | 6.55E+08 | 0.08 | -1073.58 | 3.02 | 0.05 |
| E1 | GPM2 | 1B | AX.89348612 | 4.83E+08 | 0.19 | 767.15   | 3.23 | 0.05 |
| E1 | GPM2 | 1B | AX.89683248 | 6.53E+08 | 0.12 | -978.60  | 3.56 | 0.06 |
| E1 | GPM2 | 1B | AX.89500889 | 6.61E+08 | 0.15 | -851.73  | 3.33 | 0.05 |
| E1 | GPM2 | 1B | AX.89616173 | 6.53E+08 | 0.12 | -954.36  | 3.31 | 0.05 |
| E1 | GPM2 | 1B | AX.89565905 | 6.59E+08 | 0.09 | -1080.74 | 3.46 | 0.06 |
| E1 | GPM2 | 1B | AX.89649851 | 6.53E+08 | 0.11 | -1028.45 | 3.65 | 0.06 |
| E1 | GY   | 1B | AX.89596577 | 5.95E+08 | 0.15 | -3.72    | 3.98 | 0.06 |
| E1 | GPM2 | 1B | AX.89658411 | 4.84E+08 | 0.19 | 807.71   | 3.47 | 0.05 |
| E1 | GPM2 | 1B | AX.89764633 | 6.52E+08 | 0.11 | -1028.45 | 3.65 | 0.06 |
| E1 | GY   | 1B | AX.89742936 | 5.89E+08 | 0.27 | -2.70    | 3.35 | 0.06 |
| E1 | GPM2 | 1B | AX.89748431 | 6.53E+08 | 0.11 | -1028.45 | 3.65 | 0.06 |
| E1 | GPM2 | 1B | AX.89725397 | 5.63E+08 | 0.48 | -616.75  | 3.36 | 0.05 |
| E1 | GPM2 | 1B | AX.89366249 | 6.53E+08 | 0.12 | -978.60  | 3.56 | 0.06 |
| E1 | GPM2 | 1B | AX.89323536 | 6.61E+08 | 0.15 | -820.92  | 3.13 | 0.05 |
| E1 | GY   | 1B | AX.89381776 | 4.29E+08 | 0.39 | 2.57     | 3.60 | 0.07 |
| E1 | TKW  | 1B | AX.89326274 | 5.49E+08 | 0.48 | 0.85     | 3.13 | 0.05 |
| E1 | GPM2 | 1B | AX.89431736 | 5.63E+07 | 0.29 | -635.47  | 3.01 | 0.05 |
| E1 | GPM2 | 1B | AX.89689457 | 5.49E+07 | 0.22 | -701.99  | 3.03 | 0.05 |

|    |      |    |             |          |      |          |      |      |
|----|------|----|-------------|----------|------|----------|------|------|
| E1 | GY   | 1B | AX.89756848 | 6.14E+08 | 0.20 | -3.19    | 3.67 | 0.06 |
| E1 | TKW  | 1B | AX.89475250 | 5.50E+08 | 0.47 | 0.92     | 3.61 | 0.06 |
| E1 | GPM2 | 1B | AX.89395053 | 6.53E+08 | 0.11 | -1028.45 | 3.65 | 0.06 |
| E1 | GPM2 | 1B | AX.89607064 | 6.61E+08 | 0.15 | -820.92  | 3.13 | 0.05 |
| E1 | GPM2 | 1B | AX.89395127 | 6.54E+08 | 0.12 | -1134.04 | 4.47 | 0.08 |
| E1 | GPM2 | 1B | AX.89769126 | 4.72E+08 | 0.14 | -837.68  | 3.10 | 0.05 |
| E1 | TKW  | 1B | AX.89551532 | 5.49E+08 | 0.48 | 0.86     | 3.17 | 0.05 |
| E1 | GPM2 | 1B | AX.89361355 | 4.72E+08 | 0.14 | -942.17  | 3.70 | 0.07 |
| E1 | GPM2 | 1B | AX.89761483 | 6.53E+08 | 0.11 | -1028.45 | 3.65 | 0.06 |
| E1 | GPM2 | 1B | AX.89749968 | 6.53E+08 | 0.12 | -978.60  | 3.56 | 0.06 |
| E1 | GY   | 1B | AX.89578393 | 5.71E+08 | 0.09 | -4.20    | 3.32 | 0.05 |
| E1 | GPM2 | 1B | AX.89530026 | 6.52E+08 | 0.11 | -1028.45 | 3.65 | 0.06 |
| E1 | GPM2 | 1B | AX.89594959 | 6.53E+08 | 0.11 | -1028.45 | 3.65 | 0.06 |
| E1 | GPM2 | 1B | AX.89484512 | 6.62E+08 | 0.08 | -1141.05 | 3.35 | 0.05 |
| E1 | GPM2 | 1B | AX.89463644 | 6.53E+08 | 0.11 | -1028.45 | 3.65 | 0.06 |
| E1 | GPM2 | 1B | AX.89768752 | 4.86E+08 | 0.18 | 802.88   | 3.32 | 0.05 |
| E1 | GY   | 1B | AX.89586686 | 5.48E+08 | 0.19 | -3.13    | 3.50 | 0.05 |
| E1 | GPM2 | 1B | AX.89321912 | 5.53E+07 | 0.16 | -849.20  | 3.39 | 0.05 |
| E1 | GY   | 1B | AX.89584485 | 4.46E+07 | 0.47 | 2.36     | 3.24 | 0.05 |
| E1 | TKW  | 1B | AX.89603695 | 5.49E+08 | 0.48 | 0.86     | 3.17 | 0.05 |
| E1 | GPM2 | 1B | AX.89338879 | 6.62E+08 | 0.08 | -1141.05 | 3.35 | 0.05 |
| E1 | GPM2 | 1B | AX.89331955 | 4.53E+07 | 0.05 | -1329.70 | 3.08 | 0.05 |
| E1 | TKW  | 1B | AX.89619354 | 5.51E+08 | 0.48 | 0.86     | 3.17 | 0.05 |
| E1 | TKW  | 1B | AX.89513504 | 5.51E+08 | 0.48 | 0.86     | 3.17 | 0.05 |
| E1 | GPM2 | 1B | AX.89527101 | 4.86E+08 | 0.20 | 815.28   | 3.64 | 0.05 |
| E1 | GY   | 1B | AX.89691473 | 5.96E+08 | 0.15 | -3.72    | 3.98 | 0.06 |
| E1 | TKW  | 1B | AX.89681224 | 6.81E+08 | 0.20 | 1.14     | 3.53 | 0.06 |
| E1 | TKW  | 1B | AX.89398141 | 5.49E+08 | 0.47 | 0.85     | 3.12 | 0.05 |
| E1 | TKW  | 1B | AX.89448417 | 6.49E+08 | 0.08 | -1.53    | 3.13 | 0.05 |
| E1 | GPM2 | 1B | AX.89547484 | 6.53E+08 | 0.12 | -978.60  | 3.56 | 0.06 |
| E1 | GPM2 | 1B | AX.89320488 | 6.53E+08 | 0.12 | -978.60  | 3.56 | 0.06 |
| E1 | GPM2 | 1B | AX.89669607 | 4.84E+08 | 0.19 | 807.71   | 3.47 | 0.05 |
| E1 | GPM2 | 1B | AX.89666576 | 4.84E+08 | 0.20 | 779.09   | 3.37 | 0.05 |
| E1 | GY   | 1B | AX.89468178 | 5.89E+08 | 0.13 | -4.04    | 4.06 | 0.07 |
| E1 | GPM2 | 1B | AX.89512303 | 4.85E+08 | 0.19 | 807.71   | 3.47 | 0.05 |
| E1 | GPM2 | 1B | AX.89639158 | 6.62E+08 | 0.08 | -1141.05 | 3.35 | 0.05 |
| E1 | TKW  | 1B | AX.89725558 | 5.49E+08 | 0.48 | 0.86     | 3.17 | 0.05 |
| E1 | GY   | 1B | AX.89600634 | 5.93E+08 | 0.13 | -3.89    | 4.01 | 0.06 |
| E1 | GPM2 | 1B | AX.89706580 | 5.34E+07 | 0.16 | -799.94  | 3.12 | 0.05 |
| E1 | TKW  | 1B | AX.89468317 | 5.50E+08 | 0.48 | 0.86     | 3.17 | 0.05 |
| E1 | GPM2 | 1B | AX.89718423 | 5.64E+08 | 0.39 | 623.31   | 3.28 | 0.06 |
| E1 | GPM2 | 1B | AX.89684014 | 4.84E+08 | 0.19 | 807.71   | 3.47 | 0.05 |
| E1 | GPM2 | 1B | AX.89524297 | 4.84E+08 | 0.19 | 807.71   | 3.47 | 0.05 |
| E1 | GPM2 | 1B | AX.89484812 | 6.55E+08 | 0.08 | -1073.58 | 3.02 | 0.05 |
| E1 | TKW  | 1B | AX.89472579 | 5.50E+08 | 0.47 | 0.85     | 3.12 | 0.05 |
| E1 | TKW  | 1B | AX.89520572 | 5.47E+08 | 0.33 | -0.98    | 3.65 | 0.06 |
| E1 | GY   | 1B | AX.89589368 | 5.71E+08 | 0.15 | -3.40    | 3.40 | 0.05 |
| E1 | GPM2 | 1B | AX.89577475 | 5.56E+07 | 0.16 | -849.20  | 3.39 | 0.05 |
| E1 | GPM2 | 1B | AX.89695679 | 6.61E+08 | 0.09 | -1080.74 | 3.46 | 0.06 |
| E1 | GPM2 | 1B | AX.89678168 | 6.62E+08 | 0.08 | -1141.05 | 3.35 | 0.05 |

|    |      |    |             |          |      |          |      |      |
|----|------|----|-------------|----------|------|----------|------|------|
| E1 | GPM2 | 1B | AX.89625377 | 6.53E+08 | 0.12 | -978.60  | 3.56 | 0.06 |
| E1 | TKW  | 1B | AX.89697293 | 5.47E+08 | 0.33 | -0.89    | 3.07 | 0.05 |
| E1 | TKW  | 1B | AX.89672472 | 5.50E+08 | 0.48 | 0.86     | 3.17 | 0.05 |
| E1 | TKW  | 1B | AX.89745028 | 5.50E+08 | 0.48 | 0.85     | 3.13 | 0.05 |
| E1 | TKW  | 1B | AX.89319566 | 5.50E+08 | 0.48 | 0.86     | 3.17 | 0.05 |
| E1 | TKW  | 1B | AX.89342287 | 6.41E+08 | 0.13 | 1.27     | 3.15 | 0.05 |
| E1 | TKW  | 1B | AX.89594793 | 5.49E+08 | 0.48 | 0.86     | 3.17 | 0.05 |
| E1 | TKW  | 1B | AX.89536084 | 5.46E+08 | 0.33 | -0.93    | 3.30 | 0.05 |
| E1 | TKW  | 1B | AX.89706986 | 5.49E+08 | 0.48 | 0.86     | 3.17 | 0.05 |
| E1 | TKW  | 1B | AX.89731954 | 5.50E+08 | 0.47 | 0.90     | 3.45 | 0.06 |
| E1 | GY   | 1B | AX.89525700 | 5.91E+08 | 0.26 | -2.63    | 3.14 | 0.05 |
| E1 | TKW  | 1B | AX.89478064 | 6.49E+08 | 0.08 | -1.53    | 3.13 | 0.05 |
| E1 | TKW  | 1B | AX.89701772 | 6.41E+08 | 0.13 | 1.27     | 3.15 | 0.05 |
| E1 | TKW  | 1B | AX.89668865 | 5.43E+08 | 0.32 | -0.99    | 3.63 | 0.06 |
| E1 | GPM2 | 1B | AX.89421818 | 4.72E+08 | 0.14 | -942.17  | 3.70 | 0.07 |
| E1 | TKW  | 1B | AX.89419625 | 5.49E+08 | 0.31 | -0.91    | 3.05 | 0.05 |
| E1 | TKW  | 1B | AX.89657961 | 5.51E+08 | 0.48 | 0.86     | 3.17 | 0.05 |
| E1 | GPM2 | 1B | AX.89512056 | 4.83E+08 | 0.19 | 767.15   | 3.23 | 0.05 |
| E1 | GPM2 | 1B | AX.89679406 | 6.59E+08 | 0.09 | -1080.74 | 3.46 | 0.06 |
| E1 | GPM2 | 1B | AX.89522202 | 4.87E+08 | 0.19 | 807.71   | 3.47 | 0.05 |
| E1 | GY   | 1B | AX.89578881 | 5.45E+08 | 0.33 | -2.57    | 3.42 | 0.05 |
| E1 | TKW  | 1B | AX.89511243 | 5.45E+08 | 0.33 | -0.96    | 3.47 | 0.06 |
| E1 | TKW  | 1B | AX.89541507 | 5.50E+08 | 0.32 | -0.91    | 3.13 | 0.05 |
| E1 | TKW  | 1B | AX.89753324 | 5.49E+08 | 0.49 | 0.85     | 3.12 | 0.05 |
| E1 | GPM2 | 1B | AX.89679851 | 5.52E+07 | 0.16 | -849.20  | 3.39 | 0.05 |
| E1 | GPM2 | 1B | AX.89318397 | 6.53E+08 | 0.11 | -1028.45 | 3.65 | 0.06 |
| E1 | TKW  | 1B | AX.89577934 | 5.51E+08 | 0.48 | 0.86     | 3.17 | 0.05 |
| E1 | TKW  | 1B | AX.89595857 | 6.80E+08 | 0.21 | 1.07     | 3.28 | 0.06 |
| E1 | TKW  | 1B | AX.89476140 | 5.51E+08 | 0.47 | 0.85     | 3.12 | 0.05 |
| E1 | TKW  | 1B | AX.89743657 | 5.45E+08 | 0.33 | -0.93    | 3.30 | 0.05 |
| E1 | GPM2 | 1B | AX.89594055 | 5.41E+07 | 0.16 | -849.20  | 3.39 | 0.05 |
| E1 | GPM2 | 1B | AX.89361803 | 5.63E+08 | 0.48 | -616.75  | 3.36 | 0.05 |
| E1 | TKW  | 1B | AX.89578881 | 5.45E+08 | 0.33 | -0.93    | 3.30 | 0.05 |
| E1 | GPM2 | 1B | AX.89444867 | 6.53E+08 | 0.12 | -978.60  | 3.56 | 0.06 |
| E1 | TKW  | 1B | AX.89492525 | 3.83E+08 | 0.47 | 0.90     | 3.43 | 0.06 |
| E1 | TKW  | 1B | AX.89374992 | 5.50E+08 | 0.48 | 0.86     | 3.17 | 0.05 |
| E1 | GPM2 | 1B | AX.89584051 | 5.55E+07 | 0.16 | -849.20  | 3.39 | 0.05 |
| E1 | GPM2 | 1B | AX.89326413 | 4.85E+08 | 0.19 | 807.71   | 3.47 | 0.05 |
| E1 | GPM2 | 1B | AX.89566039 | 5.49E+07 | 0.16 | -849.20  | 3.39 | 0.05 |
| E1 | GPM2 | 1B | AX.89760192 | 6.62E+08 | 0.07 | -1247.19 | 3.72 | 0.06 |
| E1 | TKW  | 1B | AX.89388830 | 5.50E+08 | 0.48 | 0.86     | 3.17 | 0.05 |
| E1 | TKW  | 1B | AX.89580983 | 5.51E+08 | 0.48 | 0.86     | 3.17 | 0.05 |
| E1 | TKW  | 1B | AX.89582073 | 5.51E+08 | 0.48 | 0.86     | 3.21 | 0.05 |
| E1 | TKW  | 1B | AX.89347943 | 5.46E+08 | 0.33 | -0.93    | 3.30 | 0.05 |
| E1 | TKW  | 1B | AX.89671741 | 6.81E+08 | 0.23 | 1.01     | 3.14 | 0.05 |
| E1 | GPM2 | 1B | AX.89588545 | 6.59E+08 | 0.09 | -1080.74 | 3.46 | 0.06 |
| E1 | GPM2 | 1B | AX.89402478 | 5.63E+08 | 0.48 | -616.75  | 3.36 | 0.05 |
| E1 | GY   | 1B | AX.89568032 | 6.15E+08 | 0.20 | -3.18    | 3.71 | 0.06 |
| E1 | GPM2 | 1B | AX.89602436 | 6.55E+08 | 0.08 | -1073.58 | 3.02 | 0.05 |
| E1 | GPM2 | 1B | AX.89339365 | 6.62E+08 | 0.08 | -1141.05 | 3.35 | 0.05 |

|    |      |    |             |          |      |         |      |      |
|----|------|----|-------------|----------|------|---------|------|------|
| E1 | GPM2 | 1B | AX.89768630 | 4.85E+08 | 0.19 | 767.15  | 3.23 | 0.05 |
| E1 | TKW  | 1B | AX.89517851 | 6.49E+08 | 0.08 | -1.53   | 3.13 | 0.05 |
| E1 | TKW  | 1B | AX.89741485 | 5.49E+08 | 0.47 | 0.85    | 3.12 | 0.05 |
| E1 | GY   | 1B | AX.89627315 | 5.73E+08 | 0.08 | -4.44   | 3.50 | 0.05 |
| E1 | TKW  | 1B | AX.89401788 | 5.49E+08 | 0.48 | 0.84    | 3.08 | 0.05 |
| E1 | TKW  | 1B | AX.89504746 | 5.51E+08 | 0.48 | 0.86    | 3.17 | 0.05 |
| E1 | TKW  | 1B | AX.89705004 | 5.49E+08 | 0.48 | 0.86    | 3.17 | 0.05 |
| E1 | TKW  | 1B | AX.89556842 | 5.50E+08 | 0.48 | 0.86    | 3.17 | 0.05 |
| E1 | GY   | 1B | AX.89714925 | 5.71E+08 | 0.09 | -4.20   | 3.32 | 0.05 |
| E1 | TKW  | 1B | AX.89434309 | 5.51E+08 | 0.48 | 0.86    | 3.17 | 0.05 |
| E1 | TKW  | 1B | AX.89565326 | 5.49E+08 | 0.48 | 0.84    | 3.08 | 0.05 |
| E1 | TKW  | 1B | AX.89475531 | 5.47E+08 | 0.48 | 0.86    | 3.17 | 0.05 |
| E1 | GY   | 1B | AX.89713584 | 6.15E+08 | 0.20 | -3.18   | 3.71 | 0.06 |
| E1 | TKW  | 1B | AX.89467807 | 5.46E+08 | 0.34 | -1.02   | 3.90 | 0.06 |
| E1 | TKW  | 1B | AX.89442105 | 5.51E+08 | 0.48 | 0.86    | 3.17 | 0.05 |
| E1 | TKW  | 1B | AX.89605837 | 5.48E+08 | 0.48 | 0.86    | 3.17 | 0.05 |
| E1 | TKW  | 1B | AX.89667596 | 5.49E+08 | 0.48 | 0.86    | 3.17 | 0.05 |
| E2 | GY   | 1B | AX.89399318 | 5.95E+08 | 0.15 | -3.00   | 3.79 | 0.05 |
| E2 | GY   | 1B | AX.89399318 | 5.95E+08 | 0.15 | -3.00   | 3.79 | 0.05 |
| E2 | GY   | 1B | AX.89400618 | 5.96E+08 | 0.15 | -3.00   | 3.79 | 0.05 |
| E2 | GY   | 1B | AX.89494116 | 6.61E+08 | 0.09 | -3.38   | 3.26 | 0.04 |
| E2 | GY   | 1B | AX.89494755 | 6.62E+08 | 0.05 | -6.79   | 6.93 | 0.10 |
| E2 | GY   | 1B | AX.89494755 | 6.62E+08 | 0.05 | -6.79   | 6.93 | 0.10 |
| E2 | GPM2 | 1B | AX.89700186 | 6.65E+08 | 0.11 | -784.37 | 3.05 | 0.07 |
| E2 | GY   | 1B | AX.89639158 | 6.62E+08 | 0.08 | -4.00   | 3.82 | 0.05 |
| E2 | GPM2 | 1B | AX.89681224 | 6.81E+08 | 0.20 | -646.62 | 3.37 | 0.05 |
| E2 | GY   | 1B | AX.89507799 | 6.66E+08 | 0.07 | -4.86   | 4.86 | 0.07 |
| E2 | GY   | 1B | AX.89760192 | 6.62E+08 | 0.07 | -4.34   | 4.20 | 0.06 |
| E2 | GPM2 | 1B | AX.89372089 | 6.62E+08 | 0.08 | -919.40 | 3.20 | 0.04 |
| E2 | GY   | 1B | AX.89637779 | 5.94E+08 | 0.05 | -4.84   | 3.78 | 0.05 |
| E2 | GY   | 1B | AX.89368826 | 5.94E+08 | 0.05 | -4.84   | 3.78 | 0.05 |
| E2 | GY   | 1B | AX.89368826 | 5.94E+08 | 0.05 | -4.84   | 3.78 | 0.05 |
| E2 | GY   | 1B | AX.89420250 | 5.94E+08 | 0.06 | -4.11   | 3.27 | 0.04 |
| E2 | GY   | 1B | AX.89420250 | 5.94E+08 | 0.06 | -4.11   | 3.27 | 0.04 |
| E2 | GY   | 1B | AX.89334216 | 5.76E+08 | 0.09 | -3.23   | 3.04 | 0.04 |
| E2 | GY   | 1B | AX.89544768 | 5.95E+08 | 0.15 | -2.74   | 3.25 | 0.04 |
| E2 | GY   | 1B | AX.89544768 | 5.95E+08 | 0.15 | -2.74   | 3.25 | 0.04 |
| E2 | TKW  | 1B | AX.89671741 | 6.81E+08 | 0.23 | 1.15    | 3.47 | 0.06 |
| E2 | GY   | 1B | AX.89580727 | 5.96E+08 | 0.15 | -3.00   | 3.79 | 0.05 |
| E2 | GY   | 1B | AX.89690662 | 5.94E+08 | 0.15 | -2.74   | 3.25 | 0.04 |
| E2 | GY   | 1B | AX.89492307 | 5.75E+08 | 0.09 | -3.23   | 3.04 | 0.04 |
| E2 | SPM2 | 1B | AX.89435072 | 6.70E+08 | 0.06 | 25.84   | 3.36 | 0.06 |
| E2 | GY   | 1B | AX.89430295 | 6.54E+08 | 0.13 | -2.91   | 3.18 | 0.06 |
| E2 | GY   | 1B | AX.89580989 | 6.46E+08 | 0.07 | -4.54   | 4.34 | 0.06 |
| E2 | GY   | 1B | AX.89580989 | 6.46E+08 | 0.07 | -4.54   | 4.34 | 0.06 |
| E2 | GY   | 1B | AX.89430501 | 5.94E+08 | 0.05 | -4.84   | 3.78 | 0.05 |
| E2 | SPM2 | 1B | AX.89498443 | 6.82E+08 | 0.07 | 26.28   | 3.87 | 0.07 |
| E2 | GY   | 1B | AX.89724852 | 5.94E+08 | 0.15 | -2.98   | 3.84 | 0.05 |
| E2 | GY   | 1B | AX.89543383 | 5.94E+08 | 0.15 | -2.74   | 3.25 | 0.04 |
| E2 | GY   | 1B | AX.89543383 | 5.94E+08 | 0.15 | -2.74   | 3.25 | 0.04 |

|    |      |    |             |          |      |          |      |      |
|----|------|----|-------------|----------|------|----------|------|------|
| E2 | GY   | 1B | AX.89372056 | 5.96E+08 | 0.15 | -3.00    | 3.79 | 0.05 |
| E2 | GY   | 1B | AX.89679406 | 6.59E+08 | 0.09 | -3.38    | 3.26 | 0.04 |
| E2 | SPM2 | 1B | AX.89441693 | 3.29E+08 | 0.19 | 15.43    | 3.21 | 0.05 |
| E2 | GY   | 1B | AX.89416093 | 6.62E+08 | 0.08 | -4.00    | 3.82 | 0.05 |
| E2 | SPM2 | 1B | AX.89349200 | 6.31E+08 | 0.13 | 18.94    | 3.47 | 0.06 |
| E2 | GY   | 1B | AX.89479897 | 5.96E+08 | 0.15 | -3.00    | 3.79 | 0.05 |
| E2 | GY   | 1B | AX.89727207 | 5.94E+08 | 0.15 | -2.98    | 3.84 | 0.05 |
| E2 | GY   | 1B | AX.89565905 | 6.59E+08 | 0.09 | -3.38    | 3.26 | 0.04 |
| E2 | GY   | 1B | AX.89520284 | 5.76E+08 | 0.09 | -3.23    | 3.04 | 0.04 |
| E2 | GY   | 1B | AX.89375527 | 6.61E+08 | 0.09 | -3.38    | 3.26 | 0.04 |
| E2 | GY   | 1B | AX.89375527 | 6.61E+08 | 0.09 | -3.38    | 3.26 | 0.04 |
| E2 | GY   | 1B | AX.89550567 | 6.59E+08 | 0.09 | -3.38    | 3.26 | 0.04 |
| E2 | GY   | 1B | AX.89550567 | 6.59E+08 | 0.09 | -3.38    | 3.26 | 0.04 |
| E2 | GY   | 1B | AX.89610491 | 6.62E+08 | 0.08 | -3.87    | 3.82 | 0.05 |
| E2 | GY   | 1B | AX.89610491 | 6.62E+08 | 0.08 | -3.87    | 3.82 | 0.05 |
| E2 | GY   | 1B | AX.89655332 | 6.65E+08 | 0.10 | -3.77    | 4.16 | 0.09 |
| E2 | GY   | 1B | AX.89655332 | 6.65E+08 | 0.10 | -3.77    | 4.16 | 0.09 |
| E2 | GY   | 1B | AX.89518107 | 5.95E+08 | 0.15 | -2.74    | 3.25 | 0.04 |
| E2 | GY   | 1B | AX.89518107 | 5.95E+08 | 0.15 | -2.74    | 3.25 | 0.04 |
| E2 | GY   | 1B | AX.89484512 | 6.62E+08 | 0.08 | -4.00    | 3.82 | 0.05 |
| E2 | GY   | 1B | AX.89484512 | 6.62E+08 | 0.08 | -4.00    | 3.82 | 0.05 |
| E2 | GY   | 1B | AX.89660818 | 6.65E+08 | 0.13 | -3.02    | 3.42 | 0.07 |
| E2 | GY   | 1B | AX.89660818 | 6.65E+08 | 0.13 | -3.02    | 3.42 | 0.07 |
| E2 | GY   | 1B | AX.89564830 | 5.94E+08 | 0.05 | -4.84    | 3.78 | 0.05 |
| E2 | GY   | 1B | AX.89564830 | 5.94E+08 | 0.05 | -4.84    | 3.78 | 0.05 |
| E2 | GPM2 | 1B | AX.89765882 | 6.46E+08 | 0.07 | -1052.91 | 3.68 | 0.06 |
| E2 | GY   | 1B | AX.89485285 | 6.65E+08 | 0.11 | -3.63    | 4.06 | 0.09 |
| E2 | GY   | 1B | AX.89485285 | 6.65E+08 | 0.11 | -3.63    | 4.06 | 0.09 |
| E2 | GY   | 1B | AX.89414699 | 5.95E+08 | 0.15 | -2.98    | 3.84 | 0.05 |
| E2 | GY   | 1B | AX.89367182 | 5.95E+08 | 0.17 | -2.68    | 3.39 | 0.04 |
| E2 | GY   | 1B | AX.89367182 | 5.95E+08 | 0.17 | -2.68    | 3.39 | 0.04 |
| E2 | GY   | 1B | AX.89449919 | 6.59E+08 | 0.09 | -3.38    | 3.26 | 0.04 |
| E2 | GY   | 1B | AX.89449919 | 6.59E+08 | 0.09 | -3.38    | 3.26 | 0.04 |
| E2 | GY   | 1B | AX.89598862 | 6.82E+08 | 0.08 | -3.69    | 3.35 | 0.11 |
| E2 | GY   | 1B | AX.89598862 | 6.82E+08 | 0.08 | -3.69    | 3.35 | 0.11 |
| E2 | GY   | 1B | AX.89380858 | 5.94E+08 | 0.15 | -2.98    | 3.84 | 0.05 |
| E2 | GY   | 1B | AX.89380858 | 5.94E+08 | 0.15 | -2.98    | 3.84 | 0.05 |
| E2 | GY   | 1B | AX.89655760 | 6.46E+08 | 0.07 | -4.54    | 4.34 | 0.06 |
| E2 | GY   | 1B | AX.89655760 | 6.46E+08 | 0.07 | -4.54    | 4.34 | 0.06 |
| E2 | GY   | 1B | AX.89666109 | 6.62E+08 | 0.08 | -3.55    | 3.26 | 0.04 |
| E2 | GY   | 1B | AX.89666109 | 6.62E+08 | 0.08 | -3.55    | 3.26 | 0.04 |
| E2 | GY   | 1B | AX.89640880 | 6.59E+08 | 0.09 | -3.38    | 3.26 | 0.04 |
| E2 | GY   | 1B | AX.89640880 | 6.59E+08 | 0.09 | -3.38    | 3.26 | 0.04 |
| E2 | GY   | 1B | AX.89417724 | 5.94E+08 | 0.15 | -2.74    | 3.25 | 0.04 |
| E2 | GY   | 1B | AX.89417724 | 5.94E+08 | 0.15 | -2.74    | 3.25 | 0.04 |
| E2 | GY   | 1B | AX.89628976 | 6.59E+08 | 0.09 | -3.38    | 3.26 | 0.04 |
| E2 | GY   | 1B | AX.89628976 | 6.59E+08 | 0.09 | -3.38    | 3.26 | 0.04 |
| E2 | GY   | 1B | AX.89546341 | 5.94E+08 | 0.15 | -2.98    | 3.84 | 0.05 |
| E2 | GY   | 1B | AX.89546341 | 5.94E+08 | 0.15 | -2.98    | 3.84 | 0.05 |
| E2 | GY   | 1B | AX.89347349 | 5.94E+08 | 0.14 | -2.75    | 3.20 | 0.04 |

|    |      |    |             |          |      |         |      |      |
|----|------|----|-------------|----------|------|---------|------|------|
| E2 | GY   | 1B | AX.89347349 | 5.94E+08 | 0.14 | -2.75   | 3.20 | 0.04 |
| E2 | GY   | 1B | AX.89635603 | 5.94E+08 | 0.15 | -2.74   | 3.25 | 0.04 |
| E2 | GY   | 1B | AX.89635603 | 5.94E+08 | 0.15 | -2.74   | 3.25 | 0.04 |
| E2 | GY   | 1B | AX.89594265 | 5.76E+08 | 0.09 | -3.23   | 3.04 | 0.04 |
| E2 | GY   | 1B | AX.89594265 | 5.76E+08 | 0.09 | -3.23   | 3.04 | 0.04 |
| E2 | GY   | 1B | AX.89384148 | 5.76E+08 | 0.09 | -3.23   | 3.04 | 0.04 |
| E2 | GY   | 1B | AX.89384148 | 5.76E+08 | 0.09 | -3.23   | 3.04 | 0.04 |
| E2 | GY   | 1B | AX.89527090 | 6.59E+08 | 0.09 | -3.38   | 3.26 | 0.04 |
| E2 | GY   | 1B | AX.89527090 | 6.59E+08 | 0.09 | -3.38   | 3.26 | 0.04 |
| E2 | GY   | 1B | AX.89597283 | 6.61E+08 | 0.09 | -3.38   | 3.26 | 0.04 |
| E2 | GY   | 1B | AX.89597283 | 6.61E+08 | 0.09 | -3.38   | 3.26 | 0.04 |
| E2 | GY   | 1B | AX.89719593 | 1.44E+07 | 0.16 | -3.02   | 4.07 | 0.05 |
| E2 | GY   | 1B | AX.89719593 | 1.44E+07 | 0.16 | -3.02   | 4.07 | 0.05 |
| E2 | GY   | 1B | AX.89644951 | 1.42E+07 | 0.20 | -2.93   | 4.49 | 0.06 |
| E2 | GY   | 1B | AX.89644951 | 1.42E+07 | 0.20 | -2.93   | 4.49 | 0.06 |
| E2 | GY   | 1B | AX.89695679 | 6.61E+08 | 0.09 | -3.38   | 3.26 | 0.04 |
| E2 | GY   | 1B | AX.89317797 | 5.95E+08 | 0.14 | -2.75   | 3.20 | 0.04 |
| E2 | GY   | 1B | AX.89317797 | 5.95E+08 | 0.14 | -2.75   | 3.20 | 0.04 |
| E2 | GY   | 1B | AX.89386642 | 5.75E+08 | 0.09 | -3.23   | 3.04 | 0.04 |
| E2 | GY   | 1B | AX.89386642 | 5.75E+08 | 0.09 | -3.23   | 3.04 | 0.04 |
| E2 | TKW  | 1B | AX.89765155 | 5.16E+07 | 0.14 | 1.48    | 3.81 | 0.07 |
| E2 | TKW  | 1B | AX.89773932 | 5.15E+07 | 0.19 | 1.21    | 3.43 | 0.06 |
| E2 | GY   | 1B | AX.89655654 | 6.62E+08 | 0.08 | -4.00   | 3.82 | 0.05 |
| E2 | GY   | 1B | AX.89655654 | 6.62E+08 | 0.08 | -4.00   | 3.82 | 0.05 |
| E2 | GY   | 1B | AX.89341296 | 6.54E+08 | 0.14 | -2.72   | 3.05 | 0.06 |
| E2 | GY   | 1B | AX.89341296 | 6.54E+08 | 0.14 | -2.72   | 3.05 | 0.06 |
| E2 | GY   | 1B | AX.89320059 | 5.95E+08 | 0.15 | -3.00   | 3.79 | 0.05 |
| E2 | GY   | 1B | AX.89320059 | 5.95E+08 | 0.15 | -3.00   | 3.79 | 0.05 |
| E2 | GY   | 1B | AX.89710848 | 5.95E+08 | 0.14 | -2.75   | 3.20 | 0.04 |
| E2 | GY   | 1B | AX.89710848 | 5.95E+08 | 0.14 | -2.75   | 3.20 | 0.04 |
| E2 | GPM2 | 1B | AX.89608895 | 6.81E+08 | 0.23 | -571.77 | 3.02 | 0.04 |
| E2 | GY   | 1B | AX.89485001 | 5.95E+08 | 0.15 | -3.00   | 3.79 | 0.05 |
| E2 | GY   | 1B | AX.89485001 | 5.95E+08 | 0.15 | -3.00   | 3.79 | 0.05 |
| E2 | GY   | 1B | AX.89321187 | 6.61E+08 | 0.09 | -3.38   | 3.26 | 0.04 |
| E2 | GY   | 1B | AX.89321187 | 6.61E+08 | 0.09 | -3.38   | 3.26 | 0.04 |
| E2 | GY   | 1B | AX.89414699 | 5.95E+08 | 0.15 | -2.98   | 3.84 | 0.05 |
| E2 | GY   | 1B | AX.89355729 | 5.94E+08 | 0.15 | -2.74   | 3.25 | 0.04 |
| E2 | GY   | 1B | AX.89355729 | 5.94E+08 | 0.15 | -2.74   | 3.25 | 0.04 |
| E2 | GY   | 1B | AX.89392454 | 5.95E+08 | 0.14 | -2.75   | 3.20 | 0.04 |
| E2 | GY   | 1B | AX.89356982 | 6.54E+08 | 0.13 | -2.91   | 3.18 | 0.06 |
| E2 | GY   | 1B | AX.89356982 | 6.54E+08 | 0.13 | -2.91   | 3.18 | 0.06 |
| E2 | GY   | 1B | AX.89323934 | 6.66E+08 | 0.10 | -3.77   | 4.16 | 0.09 |
| E2 | GY   | 1B | AX.89323934 | 6.66E+08 | 0.10 | -3.77   | 4.16 | 0.09 |
| E2 | GY   | 1B | AX.89451610 | 6.59E+08 | 0.09 | -3.38   | 3.26 | 0.04 |
| E2 | GY   | 1B | AX.89462493 | 5.95E+08 | 0.15 | -2.74   | 3.25 | 0.04 |
| E2 | GY   | 1B | AX.89462493 | 5.95E+08 | 0.15 | -2.74   | 3.25 | 0.04 |
| E2 | GY   | 1B | AX.89616546 | 6.62E+08 | 0.10 | -3.39   | 3.38 | 0.04 |
| E2 | GY   | 1B | AX.89605104 | 5.76E+08 | 0.09 | -3.23   | 3.04 | 0.04 |
| E2 | GY   | 1B | AX.89605104 | 5.76E+08 | 0.09 | -3.23   | 3.04 | 0.04 |
| E2 | TKW  | 1B | AX.89673159 | 5.03E+07 | 0.18 | 1.24    | 3.43 | 0.06 |

|    |      |    |             |          |      |          |      |      |
|----|------|----|-------------|----------|------|----------|------|------|
| E2 | GY   | 1B | AX.89395127 | 6.54E+08 | 0.12 | -3.29    | 3.71 | 0.07 |
| E2 | GY   | 1B | AX.89395127 | 6.54E+08 | 0.12 | -3.29    | 3.71 | 0.07 |
| E2 | GY   | 1B | AX.89581957 | 5.95E+08 | 0.15 | -3.00    | 3.79 | 0.05 |
| E2 | GY   | 1B | AX.89581957 | 5.95E+08 | 0.15 | -3.00    | 3.79 | 0.05 |
| E2 | GY   | 1B | AX.89327316 | 5.95E+08 | 0.15 | -3.00    | 3.79 | 0.05 |
| E2 | GY   | 1B | AX.89327316 | 5.95E+08 | 0.15 | -3.00    | 3.79 | 0.05 |
| E2 | GY   | 1B | AX.89397557 | 5.94E+08 | 0.15 | -2.98    | 3.84 | 0.05 |
| E2 | GY   | 1B | AX.89397557 | 5.94E+08 | 0.15 | -2.98    | 3.84 | 0.05 |
| E2 | GY   | 1B | AX.89695679 | 6.61E+08 | 0.09 | -3.38    | 3.26 | 0.04 |
| E2 | GY   | 1B | AX.89339365 | 6.62E+08 | 0.08 | -4.00    | 3.82 | 0.05 |
| E2 | GY   | 1B | AX.89504471 | 5.95E+08 | 0.15 | -2.98    | 3.84 | 0.05 |
| E2 | GY   | 1B | AX.89646690 | 5.96E+08 | 0.15 | -3.00    | 3.79 | 0.05 |
| E2 | GY   | 1B | AX.89646690 | 5.96E+08 | 0.15 | -3.00    | 3.79 | 0.05 |
| E2 | GY   | 1B | AX.89400618 | 5.96E+08 | 0.15 | -3.00    | 3.79 | 0.05 |
| E2 | GY   | 1B | AX.89540478 | 5.74E+08 | 0.09 | -3.23    | 3.04 | 0.04 |
| E2 | GY   | 1B | AX.89540478 | 5.74E+08 | 0.09 | -3.23    | 3.04 | 0.04 |
| E2 | TKW  | 1B | AX.89748603 | 5.00E+07 | 0.16 | 1.23     | 3.17 | 0.06 |
| E2 | GY   | 1B | AX.89494116 | 6.61E+08 | 0.09 | -3.38    | 3.26 | 0.04 |
| E2 | GY   | 1B | AX.89435723 | 6.66E+08 | 0.10 | -3.77    | 4.16 | 0.09 |
| E2 | TKW  | 1B | AX.89775611 | 5.01E+07 | 0.33 | 1.00     | 3.34 | 0.06 |
| E2 | TKW  | 1B | AX.89620528 | 5.03E+07 | 0.17 | 1.45     | 4.35 | 0.08 |
| E2 | GPM2 | 1B | AX.89524034 | 6.46E+08 | 0.07 | -1052.91 | 3.68 | 0.06 |
| E2 | GY   | 1B | AX.89401886 | 5.95E+08 | 0.14 | -2.75    | 3.20 | 0.04 |
| E2 | GY   | 1B | AX.89401886 | 5.95E+08 | 0.14 | -2.75    | 3.20 | 0.04 |
| E2 | TKW  | 1B | AX.89584849 | 5.38E+07 | 0.21 | 1.16     | 3.36 | 0.06 |
| E2 | GY   | 1B | AX.89639158 | 6.62E+08 | 0.08 | -4.00    | 3.82 | 0.05 |
| E2 | GPM2 | 1B | AX.89655654 | 6.62E+08 | 0.08 | -919.40  | 3.20 | 0.04 |
| E2 | GY   | 1B | AX.89507799 | 6.66E+08 | 0.07 | -4.86    | 4.86 | 0.07 |
| E2 | GY   | 1B | AX.89760192 | 6.62E+08 | 0.07 | -4.34    | 4.20 | 0.06 |
| E2 | TKW  | 1B | AX.89631333 | 5.02E+07 | 0.15 | 1.29     | 3.21 | 0.06 |
| E2 | GY   | 1B | AX.89721228 | 6.62E+08 | 0.08 | -4.00    | 3.82 | 0.05 |
| E2 | GY   | 1B | AX.89700186 | 6.65E+08 | 0.11 | -3.63    | 4.06 | 0.09 |
| E2 | GY   | 1B | AX.89637779 | 5.94E+08 | 0.05 | -4.84    | 3.78 | 0.05 |
| E2 | GPM2 | 1B | AX.89694069 | 6.54E+08 | 0.14 | -708.90  | 3.09 | 0.06 |
| E2 | GY   | 1B | AX.89344904 | 6.59E+08 | 0.09 | -3.38    | 3.26 | 0.04 |
| E2 | GY   | 1B | AX.89344904 | 6.59E+08 | 0.09 | -3.38    | 3.26 | 0.04 |
| E2 | GY   | 1B | AX.89392454 | 5.95E+08 | 0.14 | -2.75    | 3.20 | 0.04 |
| E2 | GY   | 1B | AX.89754639 | 5.95E+08 | 0.14 | -2.75    | 3.20 | 0.04 |
| E2 | GPM2 | 1B | AX.89598862 | 6.82E+08 | 0.08 | -892.10  | 3.06 | 0.10 |
| E2 | GY   | 1B | AX.89357199 | 5.94E+08 | 0.15 | -2.74    | 3.25 | 0.04 |
| E2 | GY   | 1B | AX.89357199 | 5.94E+08 | 0.15 | -2.74    | 3.25 | 0.04 |
| E2 | GY   | 1B | AX.89451610 | 6.59E+08 | 0.09 | -3.38    | 3.26 | 0.04 |
| E2 | GY   | 1B | AX.89334216 | 5.76E+08 | 0.09 | -3.23    | 3.04 | 0.04 |
| E2 | GY   | 1B | AX.89694069 | 6.54E+08 | 0.14 | -2.72    | 3.05 | 0.06 |
| E2 | GY   | 1B | AX.89616546 | 6.62E+08 | 0.10 | -3.39    | 3.38 | 0.04 |
| E2 | GY   | 1B | AX.89334781 | 5.96E+08 | 0.15 | -3.00    | 3.79 | 0.05 |
| E2 | GY   | 1B | AX.89334781 | 5.96E+08 | 0.15 | -3.00    | 3.79 | 0.05 |
| E2 | GY   | 1B | AX.89512032 | 6.54E+08 | 0.16 | -2.56    | 3.01 | 0.05 |
| E2 | GY   | 1B | AX.89693737 | 5.74E+08 | 0.09 | -3.23    | 3.04 | 0.04 |
| E2 | GY   | 1B | AX.89693737 | 5.74E+08 | 0.09 | -3.23    | 3.04 | 0.04 |

|    |      |    |             |          |      |          |      |      |
|----|------|----|-------------|----------|------|----------|------|------|
| E2 | GY   | 1B | AX.89580727 | 5.96E+08 | 0.15 | -3.00    | 3.79 | 0.05 |
| E2 | GY   | 1B | AX.89516168 | 6.59E+08 | 0.09 | -3.38    | 3.26 | 0.04 |
| E2 | GY   | 1B | AX.89690662 | 5.94E+08 | 0.15 | -2.74    | 3.25 | 0.04 |
| E2 | GY   | 1B | AX.89492307 | 5.75E+08 | 0.09 | -3.23    | 3.04 | 0.04 |
| E2 | GPM2 | 1B | AX.89494755 | 6.62E+08 | 0.05 | -1605.49 | 6.05 | 0.09 |
| E2 | GY   | 1B | AX.89430295 | 6.54E+08 | 0.13 | -2.91    | 3.18 | 0.06 |
| E2 | GY   | 1B | AX.89746393 | 6.62E+08 | 0.08 | -4.00    | 3.82 | 0.05 |
| E2 | GY   | 1B | AX.89746393 | 6.62E+08 | 0.08 | -4.00    | 3.82 | 0.05 |
| E2 | GY   | 1B | AX.89430501 | 5.94E+08 | 0.05 | -4.84    | 3.78 | 0.05 |
| E2 | GY   | 1B | AX.89371586 | 5.95E+08 | 0.15 | -2.74    | 3.25 | 0.04 |
| E2 | GY   | 1B | AX.89371586 | 5.95E+08 | 0.15 | -2.74    | 3.25 | 0.04 |
| E2 | GY   | 1B | AX.89691473 | 5.96E+08 | 0.15 | -3.00    | 3.79 | 0.05 |
| E2 | GY   | 1B | AX.89546727 | 6.62E+08 | 0.08 | -4.00    | 3.82 | 0.05 |
| E2 | GY   | 1B | AX.89546727 | 6.62E+08 | 0.08 | -4.00    | 3.82 | 0.05 |
| E2 | GY   | 1B | AX.89724852 | 5.94E+08 | 0.15 | -2.98    | 3.84 | 0.05 |
| E2 | GY   | 1B | AX.89372056 | 5.96E+08 | 0.15 | -3.00    | 3.79 | 0.05 |
| E2 | GY   | 1B | AX.89679406 | 6.59E+08 | 0.09 | -3.38    | 3.26 | 0.04 |
| E2 | GY   | 1B | AX.89372089 | 6.62E+08 | 0.08 | -4.00    | 3.82 | 0.05 |
| E2 | GY   | 1B | AX.89557668 | 5.75E+08 | 0.09 | -3.23    | 3.04 | 0.04 |
| E2 | GY   | 1B | AX.89557668 | 5.75E+08 | 0.09 | -3.23    | 3.04 | 0.04 |
| E2 | GY   | 1B | AX.89416093 | 6.62E+08 | 0.08 | -4.00    | 3.82 | 0.05 |
| E2 | GY   | 1B | AX.89564115 | 5.76E+08 | 0.09 | -3.23    | 3.04 | 0.04 |
| E2 | GY   | 1B | AX.89655981 | 5.75E+08 | 0.09 | -3.23    | 3.04 | 0.04 |
| E2 | GY   | 1B | AX.89655981 | 5.75E+08 | 0.09 | -3.23    | 3.04 | 0.04 |
| E2 | GY   | 1B | AX.89511165 | 6.62E+08 | 0.08 | -4.00    | 3.82 | 0.05 |
| E2 | GY   | 1B | AX.89511165 | 6.62E+08 | 0.08 | -4.00    | 3.82 | 0.05 |
| E2 | TKW  | 1B | AX.89735628 | 5.74E+07 | 0.20 | 1.17     | 3.32 | 0.06 |
| E2 | GY   | 1B | AX.89479897 | 5.96E+08 | 0.15 | -3.00    | 3.79 | 0.05 |
| E2 | GY   | 1B | AX.89727207 | 5.94E+08 | 0.15 | -2.98    | 3.84 | 0.05 |
| E2 | GY   | 1B | AX.89678168 | 6.62E+08 | 0.08 | -4.00    | 3.82 | 0.05 |
| E2 | GY   | 1B | AX.89585146 | 5.94E+08 | 0.05 | -4.84    | 3.78 | 0.05 |
| E2 | GY   | 1B | AX.89338879 | 6.62E+08 | 0.08 | -4.00    | 3.82 | 0.05 |
| E2 | GY   | 1B | AX.89338879 | 6.62E+08 | 0.08 | -4.00    | 3.82 | 0.05 |
| E2 | GY   | 1B | AX.89565905 | 6.59E+08 | 0.09 | -3.38    | 3.26 | 0.04 |
| E2 | GY   | 1B | AX.89339365 | 6.62E+08 | 0.08 | -4.00    | 3.82 | 0.05 |
| E2 | GY   | 1B | AX.89520284 | 5.76E+08 | 0.09 | -3.23    | 3.04 | 0.04 |
| E2 | GY   | 1B | AX.89550273 | 5.94E+08 | 0.15 | -2.98    | 3.84 | 0.05 |
| E2 | GY   | 1B | AX.89550273 | 5.94E+08 | 0.15 | -2.98    | 3.84 | 0.05 |
| E2 | GY   | 1B | AX.89728530 | 5.96E+08 | 0.15 | -3.00    | 3.79 | 0.05 |
| E2 | GY   | 1B | AX.89728530 | 5.96E+08 | 0.15 | -3.00    | 3.79 | 0.05 |
| E2 | GY   | 1B | AX.89744679 | 6.65E+08 | 0.13 | -3.02    | 3.42 | 0.07 |
| E2 | TKW  | 1B | AX.89753065 | 5.05E+07 | 0.18 | 1.22     | 3.35 | 0.06 |
| E2 | GY   | 1B | AX.89765882 | 6.46E+08 | 0.07 | -4.54    | 4.34 | 0.06 |
| E2 | GY   | 1B | AX.89765882 | 6.46E+08 | 0.07 | -4.54    | 4.34 | 0.06 |
| E2 | GY   | 1B | AX.89412705 | 5.95E+08 | 0.15 | -3.00    | 3.79 | 0.05 |
| E2 | GY   | 1B | AX.89659812 | 5.94E+08 | 0.15 | -2.74    | 3.25 | 0.04 |
| E2 | GY   | 1B | AX.89659812 | 5.94E+08 | 0.15 | -2.74    | 3.25 | 0.04 |
| E2 | GPM2 | 1B | AX.89746393 | 6.62E+08 | 0.08 | -919.40  | 3.20 | 0.04 |
| E2 | GY   | 1B | AX.89447503 | 6.62E+08 | 0.11 | -3.22    | 3.34 | 0.04 |
| E2 | GY   | 1B | AX.89588545 | 6.59E+08 | 0.09 | -3.38    | 3.26 | 0.04 |



|    |      |    |             |          |      |          |      |      |
|----|------|----|-------------|----------|------|----------|------|------|
| E2 | GY   | 1B | AX.89588545 | 6.59E+08 | 0.09 | -3.38    | 3.26 | 0.04 |
| E2 | GY   | 1B | AX.89700186 | 6.65E+08 | 0.11 | -3.63    | 4.06 | 0.09 |
| E2 | GY   | 1B | AX.89543657 | 5.96E+08 | 0.15 | -3.00    | 3.79 | 0.05 |
| E2 | GY   | 1B | AX.89543657 | 5.96E+08 | 0.15 | -3.00    | 3.79 | 0.05 |
| E2 | TKW  | 1B | AX.89675560 | 5.08E+07 | 0.38 | 0.98     | 3.38 | 0.06 |
| E2 | GPS  | 1B | AX.89499367 | 1.01E+07 | 0.47 | 1.35     | 3.13 | 0.04 |
| E2 | GPM2 | 1B | AX.89484512 | 6.62E+08 | 0.08 | -919.40  | 3.20 | 0.04 |
| E2 | GY   | 1B | AX.89754639 | 5.95E+08 | 0.14 | -2.75    | 3.20 | 0.04 |
| E2 | GY   | 1B | AX.89596577 | 5.95E+08 | 0.15 | -3.00    | 3.79 | 0.05 |
| E2 | GY   | 1B | AX.89596577 | 5.95E+08 | 0.15 | -3.00    | 3.79 | 0.05 |
| E2 | GY   | 1B | AX.89694069 | 6.54E+08 | 0.14 | -2.72    | 3.05 | 0.06 |
| E2 | GY   | 1B | AX.89498745 | 5.76E+08 | 0.09 | -3.23    | 3.04 | 0.04 |
| E2 | GY   | 1B | AX.89498745 | 5.76E+08 | 0.09 | -3.23    | 3.04 | 0.04 |
| E2 | TKW  | 1B | AX.89722604 | 5.02E+07 | 0.15 | 1.29     | 3.28 | 0.06 |
| E2 | TKW  | 1B | AX.89451891 | 6.81E+08 | 0.19 | 1.19     | 3.29 | 0.06 |
| E2 | TKW  | 1B | AX.89674897 | 5.01E+07 | 0.34 | 0.94     | 3.06 | 0.05 |
| E2 | GY   | 1B | AX.89372089 | 6.62E+08 | 0.08 | -4.00    | 3.82 | 0.05 |
| E2 | GY   | 1B | AX.89560184 | 6.60E+08 | 0.09 | -3.38    | 3.26 | 0.04 |
| E2 | GY   | 1B | AX.89560184 | 6.60E+08 | 0.09 | -3.38    | 3.26 | 0.04 |
| E2 | GPM2 | 1B | AX.89507799 | 6.66E+08 | 0.07 | -1019.73 | 3.44 | 0.05 |
| E2 | GY   | 1B | AX.89678168 | 6.62E+08 | 0.08 | -4.00    | 3.82 | 0.05 |
| E2 | GY   | 1B | AX.89585146 | 5.94E+08 | 0.05 | -4.84    | 3.78 | 0.05 |
| E2 | GPM2 | 1B | AX.89416093 | 6.62E+08 | 0.08 | -919.40  | 3.20 | 0.04 |
| E2 | GY   | 1B | AX.89504471 | 5.95E+08 | 0.15 | -2.98    | 3.84 | 0.05 |
| E2 | GY   | 1B | AX.89744679 | 6.65E+08 | 0.13 | -3.02    | 3.42 | 0.07 |
| E2 | GY   | 1B | AX.89599305 | 1.44E+07 | 0.49 | -2.40    | 4.50 | 0.06 |
| E2 | GY   | 1B | AX.89599305 | 1.44E+07 | 0.49 | -2.40    | 4.50 | 0.06 |
| E2 | GY   | 1B | AX.89412705 | 5.95E+08 | 0.15 | -3.00    | 3.79 | 0.05 |
| E2 | GY   | 1B | AX.89447503 | 6.62E+08 | 0.11 | -3.22    | 3.34 | 0.04 |
| E2 | TKW  | 1B | AX.89577603 | 5.01E+07 | 0.31 | 1.19     | 4.32 | 0.08 |
| E2 | GY   | 1B | AX.89512032 | 6.54E+08 | 0.16 | -2.56    | 3.01 | 0.05 |
| E2 | GPM2 | 1B | AX.89511165 | 6.62E+08 | 0.08 | -919.40  | 3.20 | 0.04 |
| E2 | TKW  | 1B | AX.89585935 | 5.05E+07 | 0.38 | 0.98     | 3.40 | 0.06 |
| E2 | GPM2 | 1B | AX.89546727 | 6.62E+08 | 0.08 | -919.40  | 3.20 | 0.04 |
| E2 | GY   | 1B | AX.89608451 | 5.95E+08 | 0.15 | -2.98    | 3.84 | 0.05 |
| E2 | TKW  | 1B | AX.89433211 | 5.03E+07 | 0.20 | 1.16     | 3.22 | 0.06 |
| E2 | TKW  | 1B | AX.89393759 | 5.01E+07 | 0.31 | 1.19     | 4.32 | 0.08 |
| E2 | TKW  | 1B | AX.89695396 | 5.10E+07 | 0.38 | 0.98     | 3.38 | 0.06 |
| E2 | GY   | 1B | AX.89516168 | 6.59E+08 | 0.09 | -3.38    | 3.26 | 0.04 |
| E2 | TKW  | 1B | AX.89583076 | 4.91E+07 | 0.35 | -0.93    | 3.01 | 0.05 |
| E2 | GPM2 | 1B | AX.89338879 | 6.62E+08 | 0.08 | -919.40  | 3.20 | 0.04 |
| E2 | TKW  | 1B | AX.89507320 | 5.63E+07 | 0.24 | 1.13     | 3.51 | 0.06 |
| E2 | GY   | 1B | AX.89721599 | 5.94E+08 | 0.15 | -3.00    | 3.79 | 0.05 |
| E2 | GY   | 1B | AX.89721599 | 5.94E+08 | 0.15 | -3.00    | 3.79 | 0.05 |
| E2 | GY   | 1B | AX.89564115 | 5.76E+08 | 0.09 | -3.23    | 3.04 | 0.04 |
| E2 | TKW  | 1B | AX.89409890 | 5.04E+07 | 0.18 | 1.22     | 3.35 | 0.06 |
| E2 | GY   | 1B | AX.89524034 | 6.46E+08 | 0.07 | -4.54    | 4.34 | 0.06 |
| E2 | GY   | 1B | AX.89524034 | 6.46E+08 | 0.07 | -4.54    | 4.34 | 0.06 |
| E2 | GY   | 1B | AX.89721228 | 6.62E+08 | 0.08 | -4.00    | 3.82 | 0.05 |
| E2 | TKW  | 1B | AX.89492525 | 3.83E+08 | 0.47 | 0.91     | 3.11 | 0.05 |

|    |      |    |             |          |      |          |      |      |
|----|------|----|-------------|----------|------|----------|------|------|
| E2 | GPM2 | 1B | AX.89323934 | 6.66E+08 | 0.10 | -824.38  | 3.18 | 0.08 |
| E2 | GY   | 1B | AX.89435723 | 6.66E+08 | 0.10 | -3.77    | 4.16 | 0.09 |
| E2 | GY   | 1B | AX.89608451 | 5.95E+08 | 0.15 | -2.98    | 3.84 | 0.05 |
| E2 | GY   | 1B | AX.89589298 | 5.95E+08 | 0.15 | -3.00    | 3.79 | 0.05 |
| E2 | GY   | 1B | AX.89589298 | 5.95E+08 | 0.15 | -3.00    | 3.79 | 0.05 |
| E2 | GY   | 1B | AX.89691473 | 5.96E+08 | 0.15 | -3.00    | 3.79 | 0.05 |
| E2 | GPM2 | 1B | AX.89371246 | 6.81E+08 | 0.23 | -603.97  | 3.28 | 0.05 |
| E2 | GPM2 | 1B | AX.89678168 | 6.62E+08 | 0.08 | -919.40  | 3.20 | 0.04 |
| E2 | GY   | 1B | AX.89486405 | 5.94E+08 | 0.15 | -3.00    | 3.79 | 0.05 |
| E2 | GY   | 1B | AX.89486405 | 5.94E+08 | 0.15 | -3.00    | 3.79 | 0.05 |
| E2 | GPM2 | 1B | AX.89721228 | 6.62E+08 | 0.08 | -919.40  | 3.20 | 0.04 |
| E2 | GY   | 1B | AX.89603516 | 6.59E+08 | 0.10 | -3.21    | 3.11 | 0.04 |
| E2 | GY   | 1B | AX.89494044 | 5.94E+08 | 0.05 | -4.84    | 3.78 | 0.05 |
| E2 | GPM2 | 1B | AX.89356982 | 6.54E+08 | 0.12 | -734.05  | 3.04 | 0.06 |
| E2 | GPM2 | 1B | AX.89430295 | 6.54E+08 | 0.12 | -734.05  | 3.04 | 0.06 |
| E2 | TKW  | 1B | AX.89686029 | 4.91E+07 | 0.13 | 1.33     | 3.10 | 0.06 |
| E2 | GY   | 1B | AX.89488197 | 5.94E+08 | 0.15 | -2.98    | 3.84 | 0.05 |
| E2 | GY   | 1B | AX.89665857 | 5.74E+08 | 0.09 | -3.23    | 3.04 | 0.04 |
| E2 | GPM2 | 1B | AX.89639158 | 6.62E+08 | 0.08 | -919.40  | 3.20 | 0.04 |
| E2 | TKW  | 1B | AX.89319753 | 5.00E+07 | 0.48 | -0.91    | 3.12 | 0.06 |
| E2 | GY   | 1B | AX.89692308 | 5.95E+08 | 0.15 | -3.00    | 3.79 | 0.05 |
| E2 | GPM2 | 1B | AX.89402857 | 6.81E+08 | 0.33 | -613.24  | 4.06 | 0.09 |
| E2 | TKW  | 1B | AX.89650808 | 5.03E+07 | 0.18 | 1.24     | 3.43 | 0.06 |
| E2 | GY   | 1B | AX.89494044 | 5.94E+08 | 0.05 | -4.84    | 3.78 | 0.05 |
| E2 | TKW  | 1B | AX.89317304 | 5.09E+07 | 0.18 | 1.31     | 3.73 | 0.07 |
| E2 | GPM2 | 1B | AX.89395127 | 6.54E+08 | 0.11 | -827.83  | 3.52 | 0.07 |
| E2 | GY   | 1B | AX.89665857 | 5.74E+08 | 0.09 | -3.23    | 3.04 | 0.04 |
| E2 | TKW  | 1B | AX.89496797 | 6.81E+08 | 0.20 | 1.25     | 3.71 | 0.07 |
| E2 | GPM2 | 1B | AX.89314667 | 6.81E+08 | 0.23 | -603.97  | 3.28 | 0.05 |
| E2 | TKW  | 1B | AX.89676980 | 5.02E+07 | 0.18 | 1.22     | 3.35 | 0.06 |
| E2 | TKW  | 1B | AX.89754637 | 5.01E+07 | 0.32 | 1.02     | 3.42 | 0.06 |
| E2 | TKW  | 1B | AX.89430979 | 5.02E+07 | 0.31 | 1.13     | 4.01 | 0.07 |
| E2 | GPM2 | 1B | AX.89580989 | 6.46E+08 | 0.07 | -1052.91 | 3.68 | 0.06 |
| E2 | GPM2 | 1B | AX.89339365 | 6.62E+08 | 0.08 | -919.40  | 3.20 | 0.04 |
| E2 | TKW  | 1B | AX.89541344 | 5.05E+07 | 0.36 | 1.08     | 3.91 | 0.07 |
| E2 | TKW  | 1B | AX.89718950 | 3.86E+07 | 0.21 | -1.09    | 3.00 | 0.05 |
| E2 | TKW  | 1B | AX.89591367 | 4.97E+07 | 0.44 | 0.90     | 3.03 | 0.05 |
| E2 | GPM2 | 1B | AX.89485285 | 6.65E+08 | 0.11 | -784.37  | 3.05 | 0.07 |
| E2 | TKW  | 1B | AX.89552620 | 5.01E+07 | 0.15 | 1.45     | 3.84 | 0.07 |
| E2 | TKW  | 1B | AX.89475250 | 5.50E+08 | 0.47 | 0.98     | 3.54 | 0.06 |
| E2 | GY   | 1B | AX.89692308 | 5.95E+08 | 0.15 | -3.00    | 3.79 | 0.05 |
| E2 | GY   | 1B | AX.89603516 | 6.59E+08 | 0.10 | -3.21    | 3.11 | 0.04 |
| E2 | GPM2 | 1B | AX.89655760 | 6.46E+08 | 0.07 | -1052.91 | 3.68 | 0.06 |
| E2 | TKW  | 1B | AX.89431803 | 4.91E+07 | 0.12 | 1.43     | 3.22 | 0.06 |
| E2 | TKW  | 1B | AX.89681224 | 6.81E+08 | 0.20 | 1.35     | 4.25 | 0.08 |
| E2 | TKW  | 1B | AX.89731954 | 5.50E+08 | 0.46 | 0.96     | 3.43 | 0.05 |
| E2 | TKW  | 1B | AX.89750424 | 5.01E+07 | 0.15 | 1.29     | 3.21 | 0.06 |
| E2 | GY   | 1B | AX.89488197 | 5.94E+08 | 0.15 | -2.98    | 3.84 | 0.05 |
| E2 | TKW  | 1B | AX.89432734 | 5.02E+07 | 0.18 | 1.40     | 4.20 | 0.08 |
| E2 | TKW  | 1B | AX.89753324 | 5.49E+08 | 0.49 | 0.90     | 3.05 | 0.05 |

|    |      |    |               |          |      |         |      |      |
|----|------|----|---------------|----------|------|---------|------|------|
| E2 | TKW  | 1B | AX.89773829   | 5.03E+07 | 0.18 | 1.31    | 3.73 | 0.07 |
| E2 | TKW  | 1B | AX.89360605   | 5.31E+07 | 0.22 | 1.08    | 3.05 | 0.05 |
| E2 | GPM2 | 1B | AX.89655332   | 6.65E+08 | 0.10 | -824.38 | 3.18 | 0.08 |
| E2 | GPM2 | 1B | AX.89671741   | 6.81E+08 | 0.23 | -670.40 | 3.94 | 0.06 |
| E2 | GPM2 | 1B | AX.89517676   | 6.81E+08 | 0.23 | -632.00 | 3.55 | 0.05 |
| E2 | GPM2 | 1B | AX.89760192   | 6.62E+08 | 0.08 | -960.20 | 3.28 | 0.05 |
| E2 | GPM2 | 1B | AX.89435723   | 6.66E+08 | 0.10 | -824.38 | 3.18 | 0.08 |
| E2 | TKW  | 1B | AX.89514229   | 5.02E+07 | 0.34 | 0.94    | 3.06 | 0.05 |
| E2 | GPM2 | 1B | AX.89341296   | 6.54E+08 | 0.14 | -708.90 | 3.09 | 0.06 |
| E2 | GPM2 | 1B | AX.89496797   | 6.81E+08 | 0.20 | -703.81 | 3.88 | 0.06 |
| E2 | TKW  | 1B | AX.89487035   | 5.05E+07 | 0.18 | 1.35    | 4.00 | 0.07 |
| E3 | GPM2 | 1B | AX.89537486   | 6.71E+08 | 0.20 | 1044.95 | 3.17 | 0.04 |
| E3 | GPS  | 1B | AX.89349705   | 5.50E+07 | 0.21 | -2.37   | 3.07 | 0.03 |
| E3 | GPS  | 1B | AX.89370171   | 5.32E+08 | 0.08 | 3.80    | 3.48 | 0.10 |
| E3 | GPS  | 1B | AX.89501274   | 5.32E+08 | 0.09 | 3.50    | 3.18 | 0.10 |
| E3 | GPS  | 1B | AX.89618894   | 5.32E+08 | 0.09 | 3.55    | 3.37 | 0.10 |
| E3 | GPS  | 1B | AX.89680637   | 5.89E+08 | 0.17 | 2.77    | 3.47 | 0.09 |
| E3 | GPS  | 1B | AX.89375029   | 5.89E+08 | 0.17 | 2.77    | 3.47 | 0.09 |
| E3 | GPS  | 1B | AX.89647569   | 5.91E+08 | 0.20 | 2.40    | 3.02 | 0.06 |
| E3 | GPS  | 1B | AX.89755321   | 6.14E+08 | 0.32 | 2.31    | 3.60 | 0.04 |
| E3 | GPS  | 1B | AX.89364192   | 6.14E+08 | 0.32 | 2.31    | 3.59 | 0.04 |
| E3 | GPS  | 1B | AX.89585539   | 6.14E+08 | 0.31 | 2.29    | 3.42 | 0.04 |
| E3 | GPS  | 1B | AX.89624410   | 6.17E+08 | 0.14 | -3.03   | 3.34 | 0.03 |
| E3 | GPS  | 1B | AX.89463909   | 6.17E+08 | 0.14 | -3.03   | 3.34 | 0.03 |
| E3 | GPS  | 1B | AX.89432343   | 6.19E+08 | 0.14 | -3.03   | 3.34 | 0.03 |
| E3 | GPS  | 1B | AX.89705416   | 6.19E+08 | 0.32 | 2.79    | 4.95 | 0.10 |
| E3 | GPS  | 1B | AX.89642782   | 6.20E+08 | 0.32 | 2.79    | 4.95 | 0.10 |
| E3 | GPS  | 1B | AX.89711608   | 6.20E+08 | 0.33 | 2.78    | 4.95 | 0.10 |
| E3 | GPS  | 1B | AX.89680164   | 6.20E+08 | 0.32 | 2.79    | 4.95 | 0.10 |
| E3 | GPS  | 1B | AX.89515778   | 6.20E+08 | 0.14 | -3.03   | 3.34 | 0.03 |
| E3 | GPS  | 1B | AX.89469991   | 6.20E+08 | 0.14 | -2.95   | 3.13 | 0.02 |
| E3 | GPS  | 1B | AX.89612667   | 6.20E+08 | 0.33 | 2.72    | 4.85 | 0.10 |
| E3 | GPS  | 1B | AX.89679213   | 6.20E+08 | 0.32 | 2.83    | 5.04 | 0.10 |
| E3 | GPS  | 1B | AX.89686819   | 6.20E+08 | 0.33 | 2.65    | 4.64 | 0.10 |
| E3 | GPS  | 1B | AX.89513568   | 6.20E+08 | 0.34 | 2.65    | 4.63 | 0.10 |
| E3 | GPS  | 1B | AX.89634475   | 6.20E+08 | 0.33 | 2.74    | 4.82 | 0.10 |
| E3 | GPS  | 1B | AX.89583956   | 6.20E+08 | 0.32 | 2.72    | 4.72 | 0.10 |
| E3 | GPS  | 1B | AX.89485937   | 6.20E+08 | 0.33 | 2.72    | 4.85 | 0.10 |
| E3 | GPS  | 1B | AX.89422172   | 6.20E+08 | 0.32 | 2.72    | 4.72 | 0.10 |
| E3 | GPS  | 1B | AX.89574336   | 6.20E+08 | 0.32 | 2.72    | 4.72 | 0.10 |
| E3 | GPS  | 1B | AX.89745715   | 6.20E+08 | 0.14 | -2.96   | 3.15 | 0.02 |
| E3 | GPS  | 1B | AX.89571267   | 6.21E+08 | 0.14 | -2.96   | 3.15 | 0.02 |
| E3 | GPS  | 1B | AX.89377173   | 6.21E+08 | 0.33 | 2.67    | 4.56 | 0.10 |
| E3 | GPS  | 1B | AX.89377770   | 6.21E+08 | 0.32 | 2.79    | 4.95 | 0.10 |
| E3 | GPS  | 1B | AX.89457493   | 6.21E+08 | 0.15 | -2.95   | 3.25 | 0.03 |
| E3 | GPS  | 1B | AX.89382491   | 6.21E+08 | 0.14 | -2.96   | 3.15 | 0.02 |
| E3 | GPS  | 1B | AX.89496156   | 6.21E+08 | 0.16 | -2.81   | 3.12 | 0.02 |
| E3 | GPS  | 1B | AX.89570740   | 6.21E+08 | 0.32 | 2.83    | 5.05 | 0.10 |
| E3 | GPS  | 1B | X.89753980_OT | 6.24E+08 | 0.13 | -2.95   | 3.08 | 0.02 |
| E3 | GPS  | 1B | X.89458278_OT | 6.24E+08 | 0.33 | 2.20    | 3.62 | 0.08 |

|    |      |    |               |          |      |        |      |      |
|----|------|----|---------------|----------|------|--------|------|------|
| E3 | GPS  | 1B | AX.89416035   | 6.21E+08 | 0.32 | 2.79   | 4.95 | 0.10 |
| E3 | GPS  | 1B | AX.89332288   | 6.21E+08 | 0.35 | 2.76   | 4.98 | 0.10 |
| E3 | GPS  | 1B | AX.89409059   | 6.21E+08 | 0.35 | 2.81   | 5.12 | 0.10 |
| E3 | GPS  | 1B | AX.89474261   | 6.21E+08 | 0.14 | -2.96  | 3.15 | 0.02 |
| E3 | GPS  | 1B | AX.89550297   | 6.21E+08 | 0.35 | 2.83   | 5.21 | 0.11 |
| E3 | GPS  | 1B | AX.89364111   | 6.21E+08 | 0.35 | 2.77   | 5.02 | 0.10 |
| E3 | GPS  | 1B | AX.89350105   | 6.21E+08 | 0.35 | 2.75   | 5.01 | 0.10 |
| E3 | GPS  | 1B | AX.89395125   | 6.21E+08 | 0.36 | 2.59   | 4.54 | 0.10 |
| E3 | GPS  | 1B | AX.89609292   | 6.22E+08 | 0.34 | 2.78   | 5.05 | 0.10 |
| E3 | GPS  | 1B | AX.89310700   | 6.22E+08 | 0.14 | -2.87  | 3.05 | 0.03 |
| E3 | GPS  | 1B | AX.89628519   | 6.22E+08 | 0.34 | 2.79   | 5.11 | 0.10 |
| E3 | GPS  | 1B | AX.89374853   | 6.22E+08 | 0.35 | 2.83   | 5.19 | 0.10 |
| E3 | GPS  | 1B | AX.89757543   | 6.22E+08 | 0.34 | 2.78   | 5.05 | 0.10 |
| E3 | GPS  | 1B | AX.89757188   | 6.22E+08 | 0.35 | 2.63   | 4.63 | 0.09 |
| E3 | GPS  | 1B | AX.89680192   | 6.22E+08 | 0.35 | 2.71   | 4.84 | 0.10 |
| E3 | GPS  | 1B | AX.89569716   | 6.22E+08 | 0.36 | 2.66   | 4.76 | 0.10 |
| E3 | GPS  | 1B | AX.89774520   | 6.22E+08 | 0.35 | 2.71   | 4.84 | 0.10 |
| E3 | GPS  | 1B | AX.89358300   | 6.22E+08 | 0.35 | 2.71   | 4.84 | 0.10 |
| E3 | GPS  | 1B | AX.89763632   | 6.22E+08 | 0.14 | -2.96  | 3.15 | 0.02 |
| E3 | GPS  | 1B | AX.89406155   | 6.22E+08 | 0.35 | 2.71   | 4.84 | 0.10 |
| E3 | GPS  | 1B | AX.89642257   | 6.22E+08 | 0.34 | 2.78   | 5.05 | 0.10 |
| E3 | GPS  | 1B | AX.89344176   | 6.22E+08 | 0.37 | 2.70   | 4.94 | 0.09 |
| E3 | GPS  | 1B | AX.89423711   | 6.22E+08 | 0.14 | -2.96  | 3.15 | 0.02 |
| E3 | GPS  | 1B | AX.89417829   | 6.22E+08 | 0.14 | -2.96  | 3.15 | 0.02 |
| E3 | GPS  | 1B | AX.89576725   | 6.22E+08 | 0.35 | 2.76   | 4.97 | 0.10 |
| E3 | GPS  | 1B | AX.89470808   | 6.22E+08 | 0.35 | 2.76   | 4.97 | 0.10 |
| E3 | GPS  | 1B | AX.89668518   | 6.22E+08 | 0.14 | -2.96  | 3.15 | 0.02 |
| E3 | GPS  | 1B | AX.89416694   | 6.22E+08 | 0.36 | 2.81   | 5.16 | 0.10 |
| E3 | GPS  | 1B | AX.89763480   | 6.22E+08 | 0.35 | 2.76   | 4.97 | 0.10 |
| E3 | GPS  | 1B | AX.89543840   | 6.22E+08 | 0.34 | 2.94   | 5.42 | 0.12 |
| E3 | GPS  | 1B | AX.89700455   | 6.22E+08 | 0.36 | 2.80   | 5.15 | 0.11 |
| E3 | GPS  | 1B | AX.89528764   | 6.22E+08 | 0.36 | 2.79   | 5.08 | 0.10 |
| E3 | GPS  | 1B | AX.89490013   | 6.22E+08 | 0.35 | 2.77   | 4.98 | 0.10 |
| E3 | GPS  | 1B | AX.89514964   | 6.22E+08 | 0.23 | 2.51   | 3.61 | 0.05 |
| E3 | GPS  | 1B | AX.89489416   | 6.23E+08 | 0.23 | 2.51   | 3.61 | 0.05 |
| E3 | GPS  | 1B | AX.89322602   | 6.24E+08 | 0.33 | 2.10   | 3.31 | 0.07 |
| E3 | GPS  | 1B | AX.89618562   | 6.24E+08 | 0.33 | 2.10   | 3.31 | 0.07 |
| E3 | GY   | 1B | AX.89537486   | 6.71E+08 | 0.20 | 3.41   | 3.04 | 0.02 |
| E3 | SPM2 | 1B | X.89318798_OT | 5.16E+07 | 0.34 | -24.99 | 4.05 | 0.09 |
| E3 | SPM2 | 1B | AX.89702058   | 5.16E+07 | 0.34 | -24.99 | 4.05 | 0.09 |
| E3 | SPM2 | 1B | X.89773040_OT | 5.19E+07 | 0.32 | -25.66 | 4.14 | 0.09 |
| E3 | SPM2 | 1B | X.89481755_OT | 5.19E+07 | 0.34 | -24.99 | 4.05 | 0.09 |
| E3 | SPM2 | 1B | X.89589121_OT | 5.19E+07 | 0.34 | -24.99 | 4.05 | 0.09 |
| E3 | SPM2 | 1B | X.89756461_OT | 5.19E+07 | 0.34 | -24.76 | 4.00 | 0.08 |
| E3 | SPM2 | 1B | X.89667444_OT | 5.20E+07 | 0.34 | -24.99 | 4.05 | 0.09 |
| E3 | SPM2 | 1B | X.89704317_OT | 5.20E+07 | 0.36 | -23.66 | 3.87 | 0.08 |
| E3 | SPM2 | 1B | X.89461216_OT | 5.22E+07 | 0.34 | -24.99 | 4.05 | 0.09 |
| E3 | SPM2 | 1B | X.89691364_OT | 5.22E+07 | 0.33 | -24.82 | 3.98 | 0.08 |
| E3 | SPM2 | 1B | X.89599251_OT | 5.23E+07 | 0.34 | -24.99 | 4.05 | 0.09 |
| E3 | SPM2 | 1B | X.89683808_OT | 5.23E+07 | 0.34 | -24.99 | 4.05 | 0.09 |

|    |      |    |               |          |      |        |      |      |
|----|------|----|---------------|----------|------|--------|------|------|
| E3 | SPM2 | 1B | X.89364263_OT | 5.23E+07 | 0.34 | -24.99 | 4.05 | 0.09 |
| E3 | SPM2 | 1B | X.89310818_OT | 5.23E+07 | 0.33 | -25.21 | 4.11 | 0.09 |
| E3 | SPM2 | 1B | X.89648931_OT | 5.23E+07 | 0.34 | -24.99 | 4.05 | 0.09 |
| E3 | SPM2 | 1B | AX.89753721   | 5.26E+07 | 0.35 | -21.01 | 3.06 | 0.06 |
| E3 | SPM2 | 1B | AX.89489428   | 5.34E+07 | 0.34 | -24.76 | 4.00 | 0.08 |
| E3 | SPM2 | 1B | X.89446477_OT | 5.71E+07 | 0.32 | -22.16 | 3.14 | 0.07 |
| E3 | SPM2 | 1B | AX.89761773   | 5.74E+07 | 0.37 | -24.74 | 4.15 | 0.08 |
| E3 | SPM2 | 1B | AX.89582634   | 5.74E+07 | 0.29 | -20.73 | 3.06 | 0.06 |
| E3 | SPM2 | 1B | X.89533360_OT | 6.54E+07 | 0.24 | -25.25 | 3.14 | 0.07 |
| E3 | SPM2 | 1B | X.89464809_OT | 6.55E+07 | 0.23 | -28.30 | 3.77 | 0.08 |
| E3 | SPM2 | 1B | X.89645031_OT | 6.61E+07 | 0.22 | -25.74 | 3.18 | 0.07 |
| E3 | SPM2 | 1B | X.89640230_OT | 9.77E+07 | 0.25 | -25.15 | 3.15 | 0.07 |
| E3 | SPM2 | 1B | AX.89479802   | 1.38E+08 | 0.28 | -23.10 | 3.01 | 0.06 |
| E3 | SPM2 | 1B | AX.89310005   | 1.64E+08 | 0.34 | -21.50 | 3.01 | 0.06 |
| E3 | SPM2 | 1B | AX.89449853   | 1.67E+08 | 0.33 | -22.46 | 3.24 | 0.06 |
| E3 | SPM2 | 1B | AX.89537822   | 1.69E+08 | 0.28 | -22.94 | 3.03 | 0.07 |
| E3 | SPM2 | 1B | AX.89459844   | 1.69E+08 | 0.32 | -22.98 | 3.25 | 0.07 |
| E3 | SPM2 | 1B | AX.89324778   | 1.70E+08 | 0.26 | -24.59 | 3.24 | 0.07 |
| E3 | SPM2 | 1B | X.89466066_OT | 1.94E+08 | 0.26 | -25.03 | 3.20 | 0.07 |
| E3 | SPM2 | 1B | AX.89321267   | 6.60E+08 | 0.30 | -23.74 | 3.15 | 0.06 |
| E3 | SPM2 | 1B | X.89450981_OT | 3.56E+07 | 0.24 | -26.27 | 3.40 | 0.07 |
| E3 | SPM2 | 1B | X.89390904_OT | 3.65E+07 | 0.25 | -24.52 | 3.05 | 0.07 |
| E3 | SPM2 | 1B | X.89746756_OT | 3.65E+07 | 0.25 | -24.52 | 3.05 | 0.07 |
| E3 | SPM2 | 1B | X.89377136_OT | 3.65E+07 | 0.25 | -24.52 | 3.05 | 0.07 |
| E3 | SPM2 | 1B | X.89527145_OT | 3.66E+07 | 0.25 | -24.52 | 3.05 | 0.07 |
| E3 | SPM2 | 1B | X.89657943_OT | 3.67E+07 | 0.25 | -24.52 | 3.05 | 0.07 |
| E3 | SPM2 | 1B | X.89309504_OT | 3.68E+07 | 0.25 | -24.52 | 3.05 | 0.07 |
| E3 | SPM2 | 1B | X.89776118_OT | 3.68E+07 | 0.25 | -24.52 | 3.05 | 0.07 |
| E3 | SPM2 | 1B | X.89354141_OT | 3.68E+07 | 0.25 | -24.52 | 3.05 | 0.07 |
| E3 | SPM2 | 1B | X.89348412_OT | 3.68E+07 | 0.25 | -24.52 | 3.05 | 0.07 |
| E3 | SPM2 | 1B | X.89441583_OT | 3.68E+07 | 0.25 | -24.52 | 3.05 | 0.07 |
| E3 | SPM2 | 1B | X.89527415_OT | 3.68E+07 | 0.25 | -24.52 | 3.05 | 0.07 |
| E3 | SPM2 | 1B | X.89459505_OT | 3.68E+07 | 0.25 | -24.34 | 3.03 | 0.07 |
| E3 | SPM2 | 1B | X.89736482_OT | 3.68E+07 | 0.25 | -24.25 | 3.02 | 0.06 |
| E3 | SPM2 | 1B | X.89555520_OT | 3.70E+07 | 0.25 | -24.34 | 3.03 | 0.07 |
| E3 | SPM2 | 1B | X.89665456_OT | 3.70E+07 | 0.25 | -25.08 | 3.21 | 0.07 |
| E3 | SPM2 | 1B | X.89462065_OT | 3.70E+07 | 0.25 | -24.52 | 3.05 | 0.07 |
| E3 | SPM2 | 1B | X.89676446_OT | 3.70E+07 | 0.25 | -24.52 | 3.05 | 0.07 |
| E3 | SPM2 | 1B | X.89427367_OT | 3.72E+07 | 0.25 | -24.52 | 3.05 | 0.07 |
| E3 | SPM2 | 1B | X.89659027_OT | 3.75E+07 | 0.25 | -24.52 | 3.05 | 0.07 |
| E3 | SPM2 | 1B | X.89325142_OT | 3.76E+07 | 0.25 | -24.52 | 3.05 | 0.07 |
| E3 | SPM2 | 1B | X.89454412_OT | 3.77E+07 | 0.25 | -24.34 | 3.03 | 0.07 |
| E3 | SPM2 | 1B | X.89525939_OT | 3.80E+07 | 0.25 | -25.32 | 3.19 | 0.07 |
| E3 | SPM2 | 1B | X.89416990_OT | 3.81E+07 | 0.21 | -27.89 | 3.51 | 0.08 |
| E3 | SPM2 | 1B | X.89473923_OT | 4.83E+07 | 0.24 | -25.72 | 3.16 | 0.07 |
| E3 | SPM2 | 1B | X.89765155_OT | 5.16E+07 | 0.43 | -22.71 | 3.76 | 0.07 |
| E3 | TKW  | 1B | X.89507565_OT | 1.84E+07 | 0.15 | 1.49   | 3.75 | 0.08 |
| E3 | TKW  | 1B | X.89404982_OT | 2.64E+07 | 0.26 | 1.03   | 3.14 | 0.06 |
| E3 | TKW  | 1B | X.89486980_OT | 1.14E+08 | 0.15 | 1.27   | 3.14 | 0.07 |
| E3 | SPM2 | 1B | X.89738384_OT | 5.14E+06 | 0.26 | -25.70 | 3.39 | 0.06 |

|    |      |    |               |          |      |         |      |      |
|----|------|----|---------------|----------|------|---------|------|------|
| E3 | SPM2 | 1B | X.89580023_OT | 6.55E+06 | 0.32 | -22.11  | 3.14 | 0.06 |
| E3 | SPM2 | 1B | X.89488881_OT | 6.56E+06 | 0.32 | -22.11  | 3.14 | 0.06 |
| E3 | SPM2 | 1B | X.89674065_OT | 6.56E+06 | 0.31 | -22.12  | 3.11 | 0.06 |
| E3 | SPM2 | 1B | X.89348101_OT | 6.58E+06 | 0.31 | -22.12  | 3.11 | 0.06 |
| E3 | SPM2 | 1B | AX.89688551   | 8.25E+06 | 0.26 | -25.09  | 3.30 | 0.07 |
| E3 | SPM2 | 1B | AX.89323670   | 8.27E+06 | 0.28 | -23.11  | 3.13 | 0.07 |
| E3 | SPM2 | 1B | AX.89546305   | 8.40E+06 | 0.29 | -23.54  | 3.30 | 0.07 |
| E3 | SPM2 | 1B | X.89416766_OT | 1.89E+07 | 0.33 | 22.03   | 3.47 | 0.07 |
| E3 | SPM2 | 1B | X.89600865_OT | 2.67E+07 | 0.26 | -24.06  | 3.01 | 0.06 |
| E3 | SPM2 | 1B | X.89468663_OT | 2.85E+07 | 0.27 | -24.07  | 3.18 | 0.06 |
| E3 | SPM2 | 1B | X.89416192_OT | 2.85E+07 | 0.26 | -24.89  | 3.22 | 0.07 |
| E3 | SPM2 | 1B | X.89508290_OT | 2.85E+07 | 0.27 | -24.07  | 3.18 | 0.06 |
| E3 | SPM2 | 1B | AX.89426987   | 2.88E+07 | 0.26 | -23.37  | 3.04 | 0.06 |
| E3 | SPM2 | 1B | AX.89671114   | 2.88E+07 | 0.28 | -23.54  | 3.12 | 0.06 |
| E3 | SPM2 | 1B | X.89394980_OT | 2.93E+07 | 0.26 | -23.70  | 3.02 | 0.06 |
| E3 | SPM2 | 1B | X.89492098_OT | 2.93E+07 | 0.26 | -24.56  | 3.20 | 0.06 |
| E3 | SPM2 | 1B | X.89375518_OT | 2.94E+07 | 0.26 | -23.70  | 3.02 | 0.06 |
| E3 | SPM2 | 1B | X.89506722_OT | 3.24E+07 | 0.25 | -24.52  | 3.05 | 0.07 |
| E3 | SPM2 | 1B | X.89645937_OT | 3.24E+07 | 0.25 | -24.52  | 3.05 | 0.07 |
| E3 | SPM2 | 1B | X.89681477_OT | 3.25E+07 | 0.25 | -24.52  | 3.05 | 0.07 |
| E3 | SPM2 | 1B | X.89391511_OT | 3.25E+07 | 0.26 | -26.19  | 3.51 | 0.08 |
| E3 | SPM2 | 1B | X.89751234_OT | 3.25E+07 | 0.25 | -24.52  | 3.05 | 0.07 |
| E3 | SPM2 | 1B | X.89465384_OT | 3.26E+07 | 0.25 | -25.41  | 3.30 | 0.07 |
| E3 | SPM2 | 1B | AX.89680559   | 3.30E+07 | 0.25 | -24.78  | 3.15 | 0.07 |
| E3 | SPM2 | 1B | X.89660883_OT | 3.40E+07 | 0.25 | -24.52  | 3.05 | 0.07 |
| E3 | SPM2 | 1B | X.89471866_OT | 3.42E+07 | 0.26 | -24.09  | 3.01 | 0.07 |
| E3 | SPM2 | 1B | X.89391014_OT | 3.50E+07 | 0.25 | -24.52  | 3.05 | 0.07 |
| E3 | SPM2 | 1B | X.89745162_OT | 3.51E+07 | 0.25 | -24.52  | 3.05 | 0.07 |
| E3 | SPM2 | 1B | X.89588909_OT | 3.51E+07 | 0.25 | -27.34  | 3.67 | 0.08 |
| E3 | SPM2 | 1B | X.89744711_OT | 3.52E+07 | 0.25 | -24.52  | 3.05 | 0.07 |
| E4 | GPM2 | 1B | AX.89610899   | 6.64E+08 | 0.13 | -731.99 | 3.83 | 0.05 |
| E4 | GPM2 | 1B | AX.89690244   | 6.64E+08 | 0.13 | -731.46 | 3.99 | 0.05 |
| E4 | GPM2 | 1B | AX.89654832   | 6.64E+08 | 0.14 | -670.90 | 3.50 | 0.05 |
| E4 | GPM2 | 1B | AX.89764133   | 6.64E+08 | 0.12 | -718.30 | 3.62 | 0.05 |
| E4 | GPM2 | 1B | AX.89496442   | 6.64E+08 | 0.14 | -670.90 | 3.50 | 0.05 |
| E4 | GPM2 | 1B | AX.89522737   | 6.63E+08 | 0.13 | -693.81 | 3.48 | 0.04 |
| E4 | GPM2 | 1B | AX.89544787   | 6.63E+08 | 0.13 | -693.81 | 3.48 | 0.04 |
| E4 | GPM2 | 1B | AX.89571674   | 6.63E+08 | 0.14 | -657.04 | 3.36 | 0.04 |
| E4 | GPM2 | 1B | AX.89684463   | 6.63E+08 | 0.15 | -750.12 | 4.55 | 0.05 |
| E4 | GPM2 | 1B | AX.89536505   | 6.64E+08 | 0.14 | -670.90 | 3.50 | 0.05 |
| E4 | GPM2 | 1B | AX.89503681   | 6.63E+08 | 0.13 | -693.81 | 3.48 | 0.04 |
| E4 | GPM2 | 1B | AX.89388459   | 6.63E+08 | 0.13 | -693.81 | 3.48 | 0.04 |
| E4 | GPM2 | 1B | AX.89499334   | 6.63E+08 | 0.13 | -693.81 | 3.48 | 0.04 |
| E4 | GPM2 | 1B | AX.89478088   | 6.63E+08 | 0.13 | -731.46 | 3.99 | 0.05 |
| E4 | GPM2 | 1B | AX.89366113   | 6.63E+08 | 0.14 | -657.04 | 3.36 | 0.04 |
| E4 | GPS  | 1B | AX.89630061   | 1.56E+07 | 0.39 | -1.57   | 3.30 | 0.02 |
| E4 | GPS  | 1B | AX.89399435   | 1.64E+07 | 0.46 | -1.63   | 3.46 | 0.03 |
| E4 | GPS  | 1B | AX.89739610   | 1.74E+07 | 0.45 | -1.55   | 3.34 | 0.06 |
| E4 | GPS  | 1B | AX.89412325   | 5.31E+08 | 0.09 | 2.71    | 3.57 | 0.07 |
| E4 | GPS  | 1B | AX.89643416   | 5.32E+08 | 0.10 | 2.58    | 3.50 | 0.07 |

|    |     |    |               |          |      |       |      |      |
|----|-----|----|---------------|----------|------|-------|------|------|
| E4 | GPS | 1B | AX.89332980   | 5.32E+08 | 0.09 | 2.71  | 3.57 | 0.07 |
| E4 | GPS | 1B | AX.89370171   | 5.32E+08 | 0.08 | 3.04  | 4.07 | 0.08 |
| E4 | GPS | 1B | AX.89501274   | 5.32E+08 | 0.09 | 2.94  | 3.99 | 0.08 |
| E4 | GPS | 1B | AX.89683118   | 5.32E+08 | 0.08 | 3.07  | 3.93 | 0.07 |
| E4 | GPS | 1B | AX.89618894   | 5.32E+08 | 0.10 | 3.04  | 4.36 | 0.08 |
| E4 | GPS | 1B | AX.89733972   | 6.25E+08 | 0.11 | 2.45  | 3.47 | 0.07 |
| E4 | GY  | 1B | AX.89575996   | 6.54E+08 | 0.28 | -1.67 | 3.16 | 0.05 |
| E4 | GY  | 1B | X.89638589_OT | 6.54E+08 | 0.22 | -1.78 | 3.11 | 0.05 |
| E4 | GY  | 1B | AX.89522737   | 6.63E+08 | 0.13 | -2.52 | 3.94 | 0.06 |
| E4 | GY  | 1B | AX.89503681   | 6.63E+08 | 0.13 | -2.52 | 3.94 | 0.06 |
| E4 | GY  | 1B | AX.89388459   | 6.63E+08 | 0.13 | -2.52 | 3.94 | 0.06 |
| E4 | GY  | 1B | AX.89499334   | 6.63E+08 | 0.13 | -2.52 | 3.94 | 0.06 |
| E4 | GY  | 1B | AX.89544787   | 6.63E+08 | 0.13 | -2.52 | 3.94 | 0.06 |
| E4 | GY  | 1B | AX.89571674   | 6.63E+08 | 0.14 | -2.28 | 3.52 | 0.06 |
| E4 | GY  | 1B | AX.89684463   | 6.63E+08 | 0.15 | -2.65 | 4.89 | 0.08 |
| E4 | GY  | 1B | AX.89366113   | 6.63E+08 | 0.14 | -2.28 | 3.52 | 0.06 |
| E4 | GY  | 1B | AX.89478088   | 6.63E+08 | 0.14 | -2.52 | 4.12 | 0.07 |
| E4 | GY  | 1B | AX.89536505   | 6.64E+08 | 0.14 | -2.26 | 3.50 | 0.06 |
| E4 | GY  | 1B | AX.89690244   | 6.64E+08 | 0.14 | -2.52 | 4.12 | 0.07 |
| E4 | GY  | 1B | AX.89496442   | 6.64E+08 | 0.14 | -2.26 | 3.50 | 0.06 |
| E4 | GY  | 1B | AX.89654832   | 6.64E+08 | 0.14 | -2.26 | 3.50 | 0.06 |
| E4 | GY  | 1B | AX.89764133   | 6.64E+08 | 0.13 | -2.59 | 4.07 | 0.07 |
| E4 | GY  | 1B | AX.89610899   | 6.64E+08 | 0.13 | -2.57 | 4.11 | 0.07 |
| E4 | GY  | 1B | AX.89473185   | 6.68E+08 | 0.07 | -2.79 | 3.03 | 0.04 |
| E4 | GY  | 1B | AX.89661321   | 6.68E+08 | 0.07 | -2.93 | 3.44 | 0.05 |
| E4 | GY  | 1B | AX.89405777   | 6.68E+08 | 0.07 | -2.93 | 3.44 | 0.05 |
| E4 | GY  | 1B | AX.89650769   | 6.68E+08 | 0.07 | -2.79 | 3.15 | 0.05 |
| E4 | GY  | 1B | AX.89621403   | 6.68E+08 | 0.09 | -2.81 | 3.75 | 0.05 |
| E4 | GY  | 1B | AX.89462134   | 6.87E+08 | 0.11 | -2.59 | 3.53 | 0.05 |
| E1 | GY  | 1D | AX.89485389   | 8.10E+06 | 0.06 | -4.98 | 3.09 | 0.06 |
| E1 | GY  | 1D | AX.89381613   | 8.06E+06 | 0.06 | -4.98 | 3.09 | 0.06 |
| E1 | GY  | 1D | AX.89496589   | 8.10E+06 | 0.06 | -4.98 | 3.09 | 0.06 |
| E1 | GY  | 1D | AX.89392468   | 7.90E+06 | 0.06 | -5.19 | 3.32 | 0.06 |
| E1 | GY  | 1D | AX.89472889   | 8.19E+06 | 0.06 | -4.98 | 3.09 | 0.06 |
| E1 | GY  | 1D | AX.89496589   | 8.10E+06 | 0.06 | -4.98 | 3.09 | 0.06 |
| E1 | GY  | 1D | AX.89333643   | 7.92E+06 | 0.06 | -4.74 | 3.04 | 0.06 |
| E1 | GY  | 1D | AX.89392468   | 7.90E+06 | 0.06 | -5.19 | 3.32 | 0.06 |
| E1 | GY  | 1D | AX.89590687   | 7.91E+06 | 0.06 | -4.74 | 3.04 | 0.06 |
| E1 | GY  | 1D | AX.89477144   | 7.94E+06 | 0.06 | -4.74 | 3.04 | 0.06 |
| E1 | GY  | 1D | AX.89331550   | 8.20E+06 | 0.06 | -4.98 | 3.09 | 0.06 |
| E1 | GY  | 1D | AX.89472889   | 8.19E+06 | 0.06 | -4.98 | 3.09 | 0.06 |
| E1 | GY  | 1D | AX.89407891   | 7.95E+06 | 0.05 | -5.45 | 3.37 | 0.07 |
| E1 | GY  | 1D | AX.89379975   | 7.95E+06 | 0.06 | -4.98 | 3.09 | 0.06 |
| E1 | GY  | 1D | AX.89379975   | 7.95E+06 | 0.06 | -4.98 | 3.09 | 0.06 |
| E1 | GY  | 1D | AX.89333643   | 7.92E+06 | 0.06 | -4.74 | 3.04 | 0.06 |
| E1 | GY  | 1D | AX.89696945   | 7.90E+06 | 0.06 | -5.19 | 3.32 | 0.06 |
| E1 | GY  | 1D | AX.89696945   | 7.90E+06 | 0.06 | -5.19 | 3.32 | 0.06 |
| E1 | GY  | 1D | AX.89753904   | 7.92E+06 | 0.06 | -4.74 | 3.04 | 0.06 |
| E1 | GY  | 1D | AX.89531175   | 8.20E+06 | 0.06 | -4.98 | 3.09 | 0.06 |
| E1 | GY  | 1D | AX.89417249   | 8.02E+06 | 0.06 | -4.74 | 3.04 | 0.06 |

|    |    |    |             |          |      |       |      |      |
|----|----|----|-------------|----------|------|-------|------|------|
| E1 | GY | 1D | AX.89381613 | 8.06E+06 | 0.06 | -4.98 | 3.09 | 0.06 |
| E1 | GY | 1D | AX.89618537 | 3.35E+06 | 0.05 | -6.33 | 4.37 | 0.07 |
| E1 | GY | 1D | AX.89407891 | 7.95E+06 | 0.05 | -5.45 | 3.37 | 0.07 |
| E1 | GY | 1D | AX.89375427 | 8.10E+06 | 0.06 | -4.98 | 3.09 | 0.06 |
| E1 | GY | 1D | AX.89687966 | 7.92E+06 | 0.06 | -4.74 | 3.04 | 0.06 |
| E1 | GY | 1D | AX.89531175 | 8.20E+06 | 0.06 | -4.98 | 3.09 | 0.06 |
| E1 | GY | 1D | AX.89590687 | 7.91E+06 | 0.06 | -4.74 | 3.04 | 0.06 |
| E1 | GY | 1D | AX.89610470 | 7.92E+06 | 0.06 | -4.74 | 3.04 | 0.06 |
| E1 | GY | 1D | AX.89494956 | 7.99E+06 | 0.05 | -5.68 | 3.61 | 0.07 |
| E1 | GY | 1D | AX.89494700 | 7.92E+06 | 0.06 | -4.74 | 3.04 | 0.06 |
| E1 | GY | 1D | AX.89501415 | 8.02E+06 | 0.06 | -4.98 | 3.09 | 0.06 |
| E1 | GY | 1D | AX.89641164 | 8.02E+06 | 0.06 | -4.98 | 3.09 | 0.06 |
| E1 | GY | 1D | AX.89467842 | 8.04E+06 | 0.06 | -4.98 | 3.09 | 0.06 |
| E1 | GY | 1D | AX.89467842 | 8.04E+06 | 0.06 | -4.98 | 3.09 | 0.06 |
| E1 | GY | 1D | AX.89676569 | 8.02E+06 | 0.06 | -4.98 | 3.09 | 0.06 |
| E1 | GY | 1D | AX.89331550 | 8.20E+06 | 0.06 | -4.98 | 3.09 | 0.06 |
| E1 | GY | 1D | AX.89651440 | 8.19E+06 | 0.06 | -4.98 | 3.09 | 0.06 |
| E1 | GY | 1D | AX.89428720 | 7.92E+06 | 0.06 | -4.74 | 3.04 | 0.06 |
| E1 | GY | 1D | AX.89501415 | 8.02E+06 | 0.06 | -4.98 | 3.09 | 0.06 |
| E1 | GY | 1D | AX.89572294 | 7.93E+06 | 0.06 | -4.74 | 3.04 | 0.06 |
| E1 | GY | 1D | AX.89620645 | 7.99E+06 | 0.06 | -4.98 | 3.09 | 0.06 |
| E1 | GY | 1D | AX.89632594 | 7.95E+06 | 0.06 | -4.98 | 3.09 | 0.06 |
| E1 | GY | 1D | AX.89516494 | 7.95E+06 | 0.06 | -4.74 | 3.04 | 0.06 |
| E1 | GY | 1D | AX.89485389 | 8.10E+06 | 0.06 | -4.98 | 3.09 | 0.06 |
| E1 | GY | 1D | AX.89417249 | 8.02E+06 | 0.06 | -4.74 | 3.04 | 0.06 |
| E1 | GY | 1D | AX.89715211 | 8.04E+06 | 0.06 | -4.98 | 3.09 | 0.06 |
| E1 | GY | 1D | AX.89489677 | 7.95E+06 | 0.06 | -4.98 | 3.09 | 0.06 |
| E1 | GY | 1D | AX.89477144 | 7.94E+06 | 0.06 | -4.74 | 3.04 | 0.06 |
| E1 | GY | 1D | AX.89516494 | 7.95E+06 | 0.06 | -4.74 | 3.04 | 0.06 |
| E1 | GY | 1D | AX.89690807 | 8.04E+06 | 0.06 | -4.98 | 3.09 | 0.06 |
| E1 | GY | 1D | AX.89687966 | 7.92E+06 | 0.06 | -4.74 | 3.04 | 0.06 |
| E1 | GY | 1D | AX.89753904 | 7.92E+06 | 0.06 | -4.74 | 3.04 | 0.06 |
| E1 | GY | 1D | AX.89697899 | 8.02E+06 | 0.06 | -4.98 | 3.09 | 0.06 |
| E1 | GY | 1D | AX.89428720 | 7.92E+06 | 0.06 | -4.74 | 3.04 | 0.06 |
| E1 | GY | 1D | AX.89726393 | 7.98E+06 | 0.06 | -4.98 | 3.09 | 0.06 |
| E1 | GY | 1D | AX.89572294 | 7.93E+06 | 0.06 | -4.74 | 3.04 | 0.06 |
| E1 | GY | 1D | AX.89744435 | 7.92E+06 | 0.06 | -4.74 | 3.04 | 0.06 |
| E1 | GY | 1D | AX.89744435 | 7.92E+06 | 0.06 | -4.74 | 3.04 | 0.06 |
| E1 | GY | 1D | AX.89683472 | 7.94E+06 | 0.06 | -4.74 | 3.04 | 0.06 |
| E1 | GY | 1D | AX.89683472 | 7.94E+06 | 0.06 | -4.74 | 3.04 | 0.06 |
| E1 | GY | 1D | AX.89676569 | 8.02E+06 | 0.06 | -4.98 | 3.09 | 0.06 |
| E1 | GY | 1D | AX.89651440 | 8.19E+06 | 0.06 | -4.98 | 3.09 | 0.06 |
| E1 | GY | 1D | AX.89715211 | 8.04E+06 | 0.06 | -4.98 | 3.09 | 0.06 |
| E1 | GY | 1D | AX.89522651 | 7.92E+06 | 0.06 | -4.74 | 3.04 | 0.06 |
| E1 | GY | 1D | AX.89522651 | 7.92E+06 | 0.06 | -4.74 | 3.04 | 0.06 |
| E1 | GY | 1D | AX.89489677 | 7.95E+06 | 0.06 | -4.98 | 3.09 | 0.06 |
| E1 | GY | 1D | AX.89494700 | 7.92E+06 | 0.06 | -4.74 | 3.04 | 0.06 |
| E1 | GY | 1D | AX.89641164 | 8.02E+06 | 0.06 | -4.98 | 3.09 | 0.06 |
| E1 | GY | 1D | AX.89620645 | 7.99E+06 | 0.06 | -4.98 | 3.09 | 0.06 |
| E1 | GY | 1D | AX.89690807 | 8.04E+06 | 0.06 | -4.98 | 3.09 | 0.06 |



|    |      |    |             |          |      |          |      |      |
|----|------|----|-------------|----------|------|----------|------|------|
| E1 | GPM2 | 1D | AX.89772918 | 1.23E+07 | 0.07 | -1182.47 | 3.24 | 0.06 |
| E1 | GY   | 1D | AX.89698093 | 7.95E+06 | 0.06 | -4.98    | 3.09 | 0.06 |
| E1 | GY   | 1D | AX.89483393 | 7.95E+06 | 0.06 | -4.74    | 3.04 | 0.06 |
| E1 | GY   | 1D | AX.89610470 | 7.92E+06 | 0.06 | -4.74    | 3.04 | 0.06 |
| E1 | GY   | 1D | AX.89726393 | 7.98E+06 | 0.06 | -4.98    | 3.09 | 0.06 |
| E1 | GY   | 1D | AX.89494956 | 7.99E+06 | 0.05 | -5.68    | 3.61 | 0.07 |
| E1 | GY   | 1D | AX.89632594 | 7.95E+06 | 0.06 | -4.98    | 3.09 | 0.06 |
| E1 | GPM2 | 1D | AX.89471059 | 1.23E+07 | 0.07 | -1182.47 | 3.24 | 0.06 |
| E1 | GY   | 1D | AX.89375427 | 8.10E+06 | 0.06 | -4.98    | 3.09 | 0.06 |
| E1 | TKW  | 1D | AX.89342604 | 4.51E+08 | 0.31 | -0.95    | 3.32 | 0.06 |
| E1 | GY   | 1D | AX.89618537 | 3.35E+06 | 0.05 | -6.33    | 4.37 | 0.07 |
| E1 | GY   | 1D | AX.89698093 | 7.95E+06 | 0.06 | -4.98    | 3.09 | 0.06 |
| E1 | GY   | 1D | AX.89483393 | 7.95E+06 | 0.06 | -4.74    | 3.04 | 0.06 |
| E1 | GY   | 1D | AX.89697899 | 8.02E+06 | 0.06 | -4.98    | 3.09 | 0.06 |
| E2 | SPM2 | 1D | AX.89599278 | 2.88E+08 | 0.23 | -13.90   | 3.05 | 0.06 |
| E2 | SPM2 | 1D | AX.89704089 | 9.88E+07 | 0.33 | -13.11   | 3.33 | 0.06 |
| E2 | SPM2 | 1D | AX.89376391 | 3.14E+08 | 0.38 | 13.13    | 3.55 | 0.06 |
| E2 | SPM2 | 1D | AX.89446789 | 9.30E+07 | 0.33 | -13.11   | 3.33 | 0.06 |
| E2 | GY   | 1D | AX.89683472 | 7.94E+06 | 0.06 | -4.64    | 3.99 | 0.08 |
| E2 | GY   | 1D | AX.89364350 | 1.20E+07 | 0.07 | -4.23    | 3.98 | 0.09 |
| E2 | SPM2 | 1D | AX.89438351 | 2.17E+08 | 0.33 | -12.67   | 3.18 | 0.06 |
| E2 | SPM2 | 1D | AX.89377994 | 4.80E+08 | 0.48 | -11.81   | 3.11 | 0.05 |
| E2 | SPM2 | 1D | AX.89314486 | 2.19E+08 | 0.40 | -11.91   | 3.04 | 0.05 |
| E2 | SPM2 | 1D | AX.89659489 | 8.82E+07 | 0.24 | -13.70   | 3.08 | 0.06 |
| E2 | SPM2 | 1D | AX.89333901 | 2.75E+07 | 0.26 | -15.25   | 3.86 | 0.07 |
| E2 | GY   | 1D | AX.89564539 | 1.21E+07 | 0.09 | -3.83    | 4.02 | 0.09 |
| E2 | GY   | 1D | AX.89494956 | 7.99E+06 | 0.05 | -5.99    | 5.49 | 0.11 |
| E2 | GY   | 1D | AX.89494956 | 7.99E+06 | 0.05 | -5.99    | 5.49 | 0.11 |
| E2 | GY   | 1D | AX.89531175 | 8.20E+06 | 0.06 | -4.85    | 4.03 | 0.09 |
| E2 | SPM2 | 1D | AX.89326264 | 1.25E+07 | 0.06 | -27.84   | 3.80 | 0.06 |
| E2 | SPM2 | 1D | AX.89401440 | 9.30E+07 | 0.24 | -13.70   | 3.08 | 0.06 |
| E2 | GY   | 1D | AX.89402917 | 7.93E+06 | 0.05 | -5.17    | 3.90 | 0.08 |
| E2 | SPM2 | 1D | AX.89698237 | 2.02E+08 | 0.31 | -12.98   | 3.21 | 0.06 |
| E2 | GY   | 1D | AX.89651440 | 8.19E+06 | 0.06 | -4.85    | 4.03 | 0.09 |
| E2 | GY   | 1D | AX.89333643 | 7.92E+06 | 0.06 | -4.64    | 3.99 | 0.08 |
| E2 | GY   | 1D | AX.89333643 | 7.92E+06 | 0.06 | -4.64    | 3.99 | 0.08 |
| E2 | SPM2 | 1D | AX.89420601 | 2.03E+08 | 0.24 | -13.78   | 3.11 | 0.06 |
| E2 | SPM2 | 1D | AX.89527033 | 2.01E+08 | 0.33 | -12.36   | 3.05 | 0.05 |
| E2 | SPM2 | 1D | AX.89598945 | 8.52E+07 | 0.25 | -14.19   | 3.34 | 0.06 |
| E2 | SPM2 | 1D | AX.89548480 | 8.04E+07 | 0.26 | -14.47   | 3.49 | 0.07 |
| E2 | SPM2 | 1D | AX.89347242 | 2.60E+08 | 0.30 | -13.38   | 3.33 | 0.06 |
| E2 | GY   | 1D | AX.89632594 | 7.95E+06 | 0.06 | -4.85    | 4.03 | 0.09 |
| E2 | SPM2 | 1D | AX.89609489 | 5.71E+07 | 0.26 | -14.17   | 3.37 | 0.06 |
| E2 | GPM2 | 1D | AX.89632594 | 7.95E+06 | 0.06 | -1066.96 | 3.12 | 0.07 |
| E2 | SPM2 | 1D | AX.89669847 | 4.79E+08 | 0.46 | -13.36   | 3.83 | 0.07 |
| E2 | SPM2 | 1D | AX.89561821 | 1.77E+08 | 0.26 | -13.48   | 3.09 | 0.06 |
| E2 | SPM2 | 1D | AX.89732763 | 1.65E+08 | 0.26 | -13.48   | 3.09 | 0.06 |
| E2 | SPM2 | 1D | AX.89412954 | 8.82E+07 | 0.30 | -13.80   | 3.51 | 0.07 |
| E2 | GY   | 1D | AX.89375427 | 8.10E+06 | 0.06 | -4.85    | 4.03 | 0.09 |
| E2 | GY   | 1D | AX.89375427 | 8.10E+06 | 0.06 | -4.85    | 4.03 | 0.09 |

|    |      |    |             |          |      |          |      |      |
|----|------|----|-------------|----------|------|----------|------|------|
| E2 | GY   | 1D | AX.89331550 | 8.20E+06 | 0.06 | -4.85    | 4.03 | 0.09 |
| E2 | GY   | 1D | AX.89331550 | 8.20E+06 | 0.06 | -4.85    | 4.03 | 0.09 |
| E2 | GY   | 1D | AX.89516494 | 7.95E+06 | 0.06 | -4.64    | 3.99 | 0.08 |
| E2 | GY   | 1D | AX.89516494 | 7.95E+06 | 0.06 | -4.64    | 3.99 | 0.08 |
| E2 | GY   | 1D | AX.89322053 | 1.23E+07 | 0.06 | -4.22    | 3.43 | 0.07 |
| E2 | GY   | 1D | AX.89709549 | 1.21E+07 | 0.10 | -3.34    | 3.31 | 0.07 |
| E2 | GY   | 1D | AX.89744435 | 7.92E+06 | 0.06 | -4.64    | 3.99 | 0.08 |
| E2 | GY   | 1D | AX.89744435 | 7.92E+06 | 0.06 | -4.64    | 3.99 | 0.08 |
| E2 | GY   | 1D | AX.89590687 | 7.91E+06 | 0.06 | -4.64    | 3.99 | 0.08 |
| E2 | GY   | 1D | AX.89590687 | 7.91E+06 | 0.06 | -4.64    | 3.99 | 0.08 |
| E2 | GY   | 1D | AX.89687966 | 7.92E+06 | 0.06 | -4.64    | 3.99 | 0.08 |
| E2 | GY   | 1D | AX.89687966 | 7.92E+06 | 0.06 | -4.64    | 3.99 | 0.08 |
| E2 | GY   | 1D | AX.89379975 | 7.95E+06 | 0.06 | -4.85    | 4.03 | 0.09 |
| E2 | GY   | 1D | AX.89379975 | 7.95E+06 | 0.06 | -4.85    | 4.03 | 0.09 |
| E2 | GY   | 1D | AX.89489677 | 7.95E+06 | 0.06 | -4.85    | 4.03 | 0.09 |
| E2 | GY   | 1D | AX.89489677 | 7.95E+06 | 0.06 | -4.85    | 4.03 | 0.09 |
| E2 | GY   | 1D | AX.89451469 | 1.23E+07 | 0.10 | -3.34    | 3.31 | 0.07 |
| E2 | GY   | 1D | AX.89451469 | 1.23E+07 | 0.10 | -3.34    | 3.31 | 0.07 |
| E2 | GY   | 1D | AX.89334129 | 1.23E+07 | 0.10 | -3.34    | 3.31 | 0.07 |
| E2 | GY   | 1D | AX.89334129 | 1.23E+07 | 0.10 | -3.34    | 3.31 | 0.07 |
| E2 | GY   | 1D | AX.89715211 | 8.04E+06 | 0.06 | -4.85    | 4.03 | 0.09 |
| E2 | GY   | 1D | AX.89381613 | 8.06E+06 | 0.06 | -4.85    | 4.03 | 0.09 |
| E2 | GY   | 1D | AX.89381613 | 8.06E+06 | 0.06 | -4.85    | 4.03 | 0.09 |
| E2 | GPM2 | 1D | AX.89620645 | 7.99E+06 | 0.06 | -1066.96 | 3.12 | 0.07 |
| E2 | GY   | 1D | AX.89620645 | 7.99E+06 | 0.06 | -4.85    | 4.03 | 0.09 |
| E2 | GY   | 1D | AX.89620645 | 7.99E+06 | 0.06 | -4.85    | 4.03 | 0.09 |
| E2 | GY   | 1D | AX.89456181 | 1.23E+07 | 0.10 | -3.34    | 3.31 | 0.07 |
| E2 | GY   | 1D | AX.89456181 | 1.23E+07 | 0.10 | -3.34    | 3.31 | 0.07 |
| E2 | GY   | 1D | AX.89467842 | 8.04E+06 | 0.06 | -4.85    | 4.03 | 0.09 |
| E2 | GY   | 1D | AX.89467842 | 8.04E+06 | 0.06 | -4.85    | 4.03 | 0.09 |
| E2 | GY   | 1D | AX.89386345 | 1.23E+07 | 0.10 | -3.34    | 3.31 | 0.07 |
| E2 | GY   | 1D | AX.89386345 | 1.23E+07 | 0.10 | -3.34    | 3.31 | 0.07 |
| E2 | GY   | 1D | AX.89364350 | 1.20E+07 | 0.07 | -4.23    | 3.98 | 0.09 |
| E2 | GPM2 | 1D | AX.89641164 | 8.02E+06 | 0.06 | -1066.96 | 3.12 | 0.07 |
| E2 | GY   | 1D | AX.89483393 | 7.95E+06 | 0.06 | -4.64    | 3.99 | 0.08 |
| E2 | GY   | 1D | AX.89483393 | 7.95E+06 | 0.06 | -4.64    | 3.99 | 0.08 |
| E2 | GY   | 1D | AX.89485389 | 8.10E+06 | 0.06 | -4.85    | 4.03 | 0.09 |
| E2 | GY   | 1D | AX.89485389 | 8.10E+06 | 0.06 | -4.85    | 4.03 | 0.09 |
| E2 | GY   | 1D | AX.89760074 | 1.21E+07 | 0.11 | -4.12    | 5.10 | 0.10 |
| E2 | GY   | 1D | AX.89402917 | 7.93E+06 | 0.05 | -5.17    | 3.90 | 0.08 |
| E2 | GY   | 1D | AX.89322053 | 1.23E+07 | 0.06 | -4.22    | 3.43 | 0.07 |
| E2 | GY   | 1D | AX.89709549 | 1.21E+07 | 0.10 | -3.34    | 3.31 | 0.07 |
| E2 | GY   | 1D | AX.89690807 | 8.04E+06 | 0.06 | -4.85    | 4.03 | 0.09 |
| E2 | GY   | 1D | AX.89690807 | 8.04E+06 | 0.06 | -4.85    | 4.03 | 0.09 |
| E2 | GPM2 | 1D | AX.89715211 | 8.04E+06 | 0.06 | -1066.96 | 3.12 | 0.07 |
| E2 | GY   | 1D | AX.89392468 | 7.90E+06 | 0.06 | -5.37    | 4.82 | 0.10 |
| E2 | GY   | 1D | AX.89392468 | 7.90E+06 | 0.06 | -5.37    | 4.82 | 0.10 |
| E2 | GY   | 1D | AX.89428720 | 7.92E+06 | 0.06 | -4.64    | 3.99 | 0.08 |
| E2 | GY   | 1D | AX.89428720 | 7.92E+06 | 0.06 | -4.64    | 3.99 | 0.08 |
| E2 | GY   | 1D | AX.89715211 | 8.04E+06 | 0.06 | -4.85    | 4.03 | 0.09 |

|    |      |    |             |          |      |          |      |      |
|----|------|----|-------------|----------|------|----------|------|------|
| E2 | GY   | 1D | AX.89472889 | 8.19E+06 | 0.06 | -4.85    | 4.03 | 0.09 |
| E2 | GY   | 1D | AX.89472889 | 8.19E+06 | 0.06 | -4.85    | 4.03 | 0.09 |
| E2 | GPS  | 1D | AX.89598295 | 7.89E+07 | 0.27 | 1.53     | 3.21 | 0.05 |
| E2 | GY   | 1D | AX.89683472 | 7.94E+06 | 0.06 | -4.64    | 3.99 | 0.08 |
| E2 | GPM2 | 1D | AX.89472889 | 8.19E+06 | 0.06 | -1066.96 | 3.12 | 0.07 |
| E2 | GPM2 | 1D | AX.89531175 | 8.20E+06 | 0.06 | -1066.96 | 3.12 | 0.07 |
| E2 | GY   | 1D | AX.89564539 | 1.21E+07 | 0.09 | -3.83    | 4.02 | 0.09 |
| E2 | GY   | 1D | AX.89531175 | 8.20E+06 | 0.06 | -4.85    | 4.03 | 0.09 |
| E2 | GPM2 | 1D | AX.89407891 | 7.95E+06 | 0.05 | -1123.31 | 3.20 | 0.07 |
| E2 | GY   | 1D | AX.89651440 | 8.19E+06 | 0.06 | -4.85    | 4.03 | 0.09 |
| E2 | GY   | 1D | AX.89697899 | 8.02E+06 | 0.06 | -4.85    | 4.03 | 0.09 |
| E2 | GY   | 1D | AX.89632594 | 7.95E+06 | 0.06 | -4.85    | 4.03 | 0.09 |
| E2 | GY   | 1D | AX.89407891 | 7.95E+06 | 0.05 | -5.44    | 4.62 | 0.09 |
| E2 | GY   | 1D | AX.89407891 | 7.95E+06 | 0.05 | -5.44    | 4.62 | 0.09 |
| E2 | GY   | 1D | AX.89753904 | 7.92E+06 | 0.06 | -4.64    | 3.99 | 0.08 |
| E2 | GY   | 1D | AX.89762961 | 1.23E+07 | 0.10 | -3.34    | 3.31 | 0.07 |
| E2 | GY   | 1D | AX.89676569 | 8.02E+06 | 0.06 | -4.85    | 4.03 | 0.09 |
| E2 | GPM2 | 1D | AX.89392468 | 7.90E+06 | 0.06 | -1071.88 | 3.15 | 0.07 |
| E2 | GY   | 1D | AX.89610470 | 7.92E+06 | 0.06 | -4.64    | 3.99 | 0.08 |
| E2 | GY   | 1D | AX.89610470 | 7.92E+06 | 0.06 | -4.64    | 3.99 | 0.08 |
| E2 | GPS  | 1D | AX.89333901 | 2.75E+07 | 0.26 | 1.76     | 3.98 | 0.06 |
| E2 | GY   | 1D | AX.89496589 | 8.10E+06 | 0.06 | -4.85    | 4.03 | 0.09 |
| E2 | GY   | 1D | AX.89697899 | 8.02E+06 | 0.06 | -4.85    | 4.03 | 0.09 |
| E2 | GY   | 1D | AX.89494700 | 7.92E+06 | 0.06 | -4.64    | 3.99 | 0.08 |
| E2 | GY   | 1D | AX.89494700 | 7.92E+06 | 0.06 | -4.64    | 3.99 | 0.08 |
| E2 | GY   | 1D | AX.89417249 | 8.02E+06 | 0.06 | -4.64    | 3.99 | 0.08 |
| E2 | GY   | 1D | AX.89417249 | 8.02E+06 | 0.06 | -4.64    | 3.99 | 0.08 |
| E2 | GY   | 1D | AX.89641164 | 8.02E+06 | 0.06 | -4.85    | 4.03 | 0.09 |
| E2 | GY   | 1D | AX.89477144 | 7.94E+06 | 0.06 | -4.64    | 3.99 | 0.08 |
| E2 | GY   | 1D | AX.89477144 | 7.94E+06 | 0.06 | -4.64    | 3.99 | 0.08 |
| E2 | GY   | 1D | AX.89570610 | 1.23E+07 | 0.09 | -3.83    | 4.02 | 0.09 |
| E2 | GY   | 1D | AX.89570610 | 1.23E+07 | 0.09 | -3.83    | 4.02 | 0.09 |
| E2 | GY   | 1D | AX.89726393 | 7.98E+06 | 0.06 | -4.85    | 4.03 | 0.09 |
| E2 | GY   | 1D | AX.89726393 | 7.98E+06 | 0.06 | -4.85    | 4.03 | 0.09 |
| E2 | GY   | 1D | AX.89753904 | 7.92E+06 | 0.06 | -4.64    | 3.99 | 0.08 |
| E2 | GY   | 1D | AX.89572294 | 7.93E+06 | 0.06 | -4.64    | 3.99 | 0.08 |
| E2 | GY   | 1D | AX.89572294 | 7.93E+06 | 0.06 | -4.64    | 3.99 | 0.08 |
| E2 | GY   | 1D | AX.89676569 | 8.02E+06 | 0.06 | -4.85    | 4.03 | 0.09 |
| E2 | GPM2 | 1D | AX.89651440 | 8.19E+06 | 0.06 | -1066.96 | 3.12 | 0.07 |
| E2 | GY   | 1D | AX.89641164 | 8.02E+06 | 0.06 | -4.85    | 4.03 | 0.09 |
| E2 | GPM2 | 1D | AX.89726393 | 7.98E+06 | 0.06 | -1066.96 | 3.12 | 0.07 |
| E2 | GY   | 1D | AX.89696945 | 7.90E+06 | 0.06 | -5.37    | 4.82 | 0.10 |
| E2 | GY   | 1D | AX.89696945 | 7.90E+06 | 0.06 | -5.37    | 4.82 | 0.10 |
| E2 | GPM2 | 1D | AX.89676569 | 8.02E+06 | 0.06 | -1066.96 | 3.12 | 0.07 |
| E2 | GPM2 | 1D | AX.89690807 | 8.04E+06 | 0.06 | -1066.96 | 3.12 | 0.07 |
| E2 | GY   | 1D | AX.89698093 | 7.95E+06 | 0.06 | -4.85    | 4.03 | 0.09 |
| E2 | GPM2 | 1D | AX.89760074 | 1.21E+07 | 0.11 | -844.51  | 3.46 | 0.08 |
| E2 | GY   | 1D | AX.89760074 | 1.21E+07 | 0.11 | -4.12    | 5.10 | 0.10 |
| E2 | GY   | 1D | AX.89496589 | 8.10E+06 | 0.06 | -4.85    | 4.03 | 0.09 |
| E2 | GY   | 1D | AX.89522651 | 7.92E+06 | 0.06 | -4.64    | 3.99 | 0.08 |

|    |      |    |               |          |      |          |      |      |
|----|------|----|---------------|----------|------|----------|------|------|
| E2 | GY   | 1D | AX.89522651   | 7.92E+06 | 0.06 | -4.64    | 3.99 | 0.08 |
| E2 | GY   | 1D | AX.89618537   | 3.35E+06 | 0.05 | -5.79    | 5.24 | 0.07 |
| E2 | GY   | 1D | AX.89501415   | 8.02E+06 | 0.06 | -4.85    | 4.03 | 0.09 |
| E2 | GY   | 1D | AX.89501415   | 8.02E+06 | 0.06 | -4.85    | 4.03 | 0.09 |
| E2 | GPS  | 1D | AX.89736405   | 4.10E+08 | 0.31 | -1.43    | 3.05 | 0.04 |
| E2 | GPM2 | 1D | AX.89696945   | 7.90E+06 | 0.06 | -1071.88 | 3.15 | 0.07 |
| E2 | GPM2 | 1D | AX.89501415   | 8.02E+06 | 0.06 | -1066.96 | 3.12 | 0.07 |
| E2 | GPM2 | 1D | AX.89489677   | 7.95E+06 | 0.06 | -1066.96 | 3.12 | 0.07 |
| E2 | GY   | 1D | AX.89698093   | 7.95E+06 | 0.06 | -4.85    | 4.03 | 0.09 |
| E2 | GPM2 | 1D | AX.89485389   | 8.10E+06 | 0.06 | -1066.96 | 3.12 | 0.07 |
| E2 | GPM2 | 1D | AX.89381613   | 8.06E+06 | 0.06 | -1066.96 | 3.12 | 0.07 |
| E2 | GPM2 | 1D | AX.89379975   | 7.95E+06 | 0.06 | -1066.96 | 3.12 | 0.07 |
| E2 | GPM2 | 1D | AX.89331550   | 8.20E+06 | 0.06 | -1066.96 | 3.12 | 0.07 |
| E2 | GY   | 1D | AX.89618537   | 3.35E+06 | 0.05 | -5.79    | 5.24 | 0.07 |
| E2 | GY   | 1D | AX.89762961   | 1.23E+07 | 0.10 | -3.34    | 3.31 | 0.07 |
| E2 | GPM2 | 1D | AX.89698093   | 7.95E+06 | 0.06 | -1066.96 | 3.12 | 0.07 |
| E2 | GPM2 | 1D | AX.89697899   | 8.02E+06 | 0.06 | -1066.96 | 3.12 | 0.07 |
| E2 | GPM2 | 1D | AX.89496589   | 8.10E+06 | 0.06 | -1066.96 | 3.12 | 0.07 |
| E2 | GPM2 | 1D | AX.89467842   | 8.04E+06 | 0.06 | -1066.96 | 3.12 | 0.07 |
| E2 | GPM2 | 1D | AX.89494956   | 7.99E+06 | 0.05 | -1126.09 | 3.22 | 0.07 |
| E2 | GPM2 | 1D | AX.89375427   | 8.10E+06 | 0.06 | -1066.96 | 3.12 | 0.07 |
| E3 | GPM2 | 1D | AX.89463982   | 2.09E+07 | 0.10 | 1438.85  | 3.23 | 0.06 |
| E3 | GPM2 | 1D | AX.89507713   | 7.31E+07 | 0.12 | 1335.59  | 3.36 | 0.08 |
| E3 | GPM2 | 1D | AX.89578094   | 3.66E+08 | 0.12 | 1325.83  | 3.08 | 0.09 |
| E3 | GPS  | 1D | AX.89364350   | 1.22E+07 | 0.39 | -2.32    | 3.93 | 0.13 |
| E3 | GPS  | 1D | AX.89744650   | 4.83E+08 | 0.44 | -2.07    | 3.33 | 0.07 |
| E3 | GY   | 1D | AX.89684119   | 7.10E+06 | 0.37 | 3.06     | 3.15 | 0.11 |
| E3 | GY   | 1D | AX.89463982   | 2.09E+07 | 0.10 | 4.95     | 3.42 | 0.04 |
| E3 | GY   | 1D | AX.89507713   | 7.31E+07 | 0.12 | 4.46     | 3.33 | 0.09 |
| E3 | SPM2 | 1D | AX.89753708   | 2.17E+07 | 0.04 | 53.65    | 3.50 | 0.07 |
| E4 | GPM2 | 1D | AX.89623335   | 4.77E+08 | 0.13 | -810.64  | 4.72 | 0.06 |
| E4 | GPS  | 1D | AX.89318668   | 4.54E+08 | 0.14 | 2.32     | 3.82 | 0.07 |
| E4 | GY   | 1D | AX.89606955   | 2.69E+08 | 0.08 | -3.12    | 4.01 | 0.06 |
| E4 | GY   | 1D | AX.89539212   | 2.70E+08 | 0.08 | -2.75    | 3.34 | 0.05 |
| E4 | GY   | 1D | AX.89753687   | 2.72E+08 | 0.08 | -3.12    | 4.01 | 0.06 |
| E4 | GY   | 1D | AX.89613260   | 2.74E+08 | 0.08 | -3.12    | 4.01 | 0.06 |
| E4 | GY   | 1D | AX.89586226   | 2.74E+08 | 0.09 | -2.76    | 3.45 | 0.05 |
| E4 | GY   | 1D | AX.89643148   | 2.78E+08 | 0.08 | -3.31    | 4.31 | 0.06 |
| E4 | GY   | 1D | AX.89529753   | 2.81E+08 | 0.08 | -3.31    | 4.31 | 0.06 |
| E4 | GY   | 1D | AX.89741695   | 2.83E+08 | 0.08 | -3.31    | 4.31 | 0.06 |
| E4 | GY   | 1D | AX.89364341   | 2.85E+08 | 0.07 | -3.02    | 3.59 | 0.05 |
| E4 | GY   | 1D | AX.89444914   | 2.89E+08 | 0.07 | -3.06    | 3.64 | 0.05 |
| E4 | GY   | 1D | AX.89561437   | 2.93E+08 | 0.07 | -3.41    | 4.38 | 0.06 |
| E4 | GY   | 1D | AX.89755578   | 2.93E+08 | 0.07 | -3.39    | 4.20 | 0.06 |
| E4 | GY   | 1D | AX.89411064   | 2.93E+08 | 0.08 | -3.05    | 3.78 | 0.05 |
| E4 | GY   | 1D | AX.89322056   | 2.94E+08 | 0.08 | -2.88    | 3.51 | 0.05 |
| E4 | GY   | 1D | AX.89609066   | 3.02E+08 | 0.07 | -3.21    | 3.58 | 0.06 |
| E4 | GY   | 1D | AX.89623335   | 4.77E+08 | 0.13 | -2.77    | 4.82 | 0.08 |
| E4 | GY   | 1D | X.89577482_OT | 7.76E+07 | 0.07 | -3.22    | 3.77 | 0.05 |
| E4 | GY   | 1D | AX.89444313   | 1.73E+08 | 0.08 | -3.19    | 4.11 | 0.06 |

|    |      |    |             |          |      |        |      |      |
|----|------|----|-------------|----------|------|--------|------|------|
| E4 | GY   | 1D | AX.89729040 | 2.18E+08 | 0.10 | -3.00  | 4.30 | 0.07 |
| E4 | SPM2 | 1D | AX.89347517 | 3.20E+08 | 0.06 | 37.74  | 3.78 | 0.05 |
| E4 | SPM2 | 1D | AX.89515010 | 4.34E+08 | 0.31 | 17.87  | 3.11 | 0.04 |
| E4 | SPM2 | 1D | AX.89722511 | 4.34E+08 | 0.31 | 17.87  | 3.11 | 0.04 |
| E4 | SPM2 | 1D | AX.89543956 | 4.34E+08 | 0.31 | 17.87  | 3.11 | 0.04 |
| E4 | SPM2 | 1D | AX.89521176 | 4.34E+08 | 0.31 | 17.87  | 3.11 | 0.04 |
| E4 | SPM2 | 1D | AX.89475596 | 4.34E+08 | 0.31 | 18.14  | 3.18 | 0.04 |
| E4 | SPM2 | 1D | AX.89429238 | 4.34E+08 | 0.32 | 19.04  | 3.60 | 0.04 |
| E4 | SPM2 | 1D | AX.89398238 | 4.34E+08 | 0.31 | 17.87  | 3.11 | 0.04 |
| E4 | SPM2 | 1D | AX.89347182 | 4.34E+08 | 0.41 | -16.68 | 3.29 | 0.04 |
| E4 | SPM2 | 1D | AX.89482623 | 4.34E+08 | 0.31 | 17.87  | 3.11 | 0.04 |
| E4 | SPM2 | 1D | AX.89559638 | 4.34E+08 | 0.30 | 17.93  | 3.11 | 0.04 |
| E4 | SPM2 | 1D | AX.89456506 | 4.34E+08 | 0.30 | 18.71  | 3.37 | 0.04 |
| E4 | TKW  | 1D | AX.89340324 | 4.68E+08 | 0.14 | -1.21  | 3.37 | 0.05 |
| E1 | GY   | 2A | AX.89343827 | 8.63E+07 | 0.07 | -4.82  | 3.53 | 0.07 |
| E1 | GY   | 2A | AX.89746110 | 6.12E+08 | 0.49 | -2.30  | 3.16 | 0.05 |
| E1 | GY   | 2A | AX.89343827 | 8.63E+07 | 0.07 | -4.82  | 3.53 | 0.07 |
| E1 | GY   | 2A | AX.89517936 | 7.10E+07 | 0.32 | -2.42  | 3.06 | 0.06 |
| E1 | GY   | 2A | AX.86169701 | 7.76E+08 | 0.10 | -3.68  | 3.00 | 0.04 |
| E1 | GY   | 2A | AX.86169701 | 7.76E+08 | 0.10 | -3.68  | 3.00 | 0.04 |
| E1 | GY   | 2A | AX.89534309 | 6.12E+08 | 0.49 | -2.30  | 3.16 | 0.05 |
| E1 | GY   | 2A | AX.89468956 | 8.39E+07 | 0.21 | -3.01  | 3.56 | 0.06 |
| E1 | GY   | 2A | AX.89431398 | 7.14E+07 | 0.43 | -2.29  | 3.09 | 0.06 |
| E1 | GY   | 2A | AX.89534309 | 6.12E+08 | 0.49 | -2.30  | 3.16 | 0.05 |
| E1 | GY   | 2A | AX.89328714 | 7.69E+08 | 0.06 | -4.93  | 3.07 | 0.05 |
| E1 | GY   | 2A | AX.89542461 | 6.93E+08 | 0.19 | -3.86  | 5.03 | 0.08 |
| E1 | GY   | 2A | AX.89318649 | 6.12E+08 | 0.50 | 2.38   | 3.35 | 0.05 |
| E1 | GY   | 2A | AX.89757261 | 7.69E+08 | 0.21 | -3.22  | 3.95 | 0.06 |
| E1 | GY   | 2A | AX.89542301 | 7.59E+08 | 0.07 | -4.32  | 3.08 | 0.05 |
| E1 | GY   | 2A | AX.89339520 | 8.39E+07 | 0.21 | -3.01  | 3.51 | 0.06 |
| E1 | GY   | 2A | AX.89501387 | 8.39E+07 | 0.21 | -3.01  | 3.56 | 0.06 |
| E1 | GY   | 2A | AX.89404168 | 6.23E+07 | 0.45 | -2.26  | 3.03 | 0.05 |
| E1 | GY   | 2A | AX.89586153 | 7.10E+07 | 0.43 | -2.29  | 3.09 | 0.06 |
| E1 | GY   | 2A | AX.89457808 | 7.69E+08 | 0.20 | -3.25  | 3.95 | 0.06 |
| E1 | GY   | 2A | AX.89352998 | 7.11E+07 | 0.32 | -2.42  | 3.06 | 0.06 |
| E1 | GY   | 2A | AX.89320118 | 6.12E+08 | 0.49 | -2.30  | 3.16 | 0.05 |
| E1 | GY   | 2A | AX.89378004 | 8.39E+07 | 0.21 | -3.01  | 3.56 | 0.06 |
| E1 | GY   | 2A | AX.89553523 | 8.63E+07 | 0.23 | -3.06  | 3.85 | 0.07 |
| E1 | GY   | 2A | AX.89441861 | 3.59E+07 | 0.09 | 4.03   | 3.13 | 0.05 |
| E1 | GY   | 2A | AX.89372440 | 7.10E+07 | 0.43 | -2.29  | 3.09 | 0.06 |
| E1 | GY   | 2A | AX.89353071 | 8.49E+07 | 0.23 | -2.96  | 3.60 | 0.06 |
| E1 | GY   | 2A | AX.89408757 | 7.11E+07 | 0.43 | -2.29  | 3.09 | 0.06 |
| E1 | GY   | 2A | AX.89432407 | 8.56E+07 | 0.23 | -3.06  | 3.85 | 0.07 |
| E1 | GY   | 2A | AX.89369312 | 8.46E+07 | 0.23 | -2.74  | 3.16 | 0.05 |
| E1 | GY   | 2A | AX.89463340 | 8.63E+07 | 0.23 | -3.06  | 3.85 | 0.07 |
| E1 | GY   | 2A | AX.89328714 | 7.69E+08 | 0.06 | -4.93  | 3.07 | 0.05 |
| E1 | GY   | 2A | AX.89508461 | 8.56E+07 | 0.07 | -4.82  | 3.53 | 0.07 |
| E1 | GY   | 2A | AX.89694875 | 7.11E+07 | 0.32 | -2.42  | 3.06 | 0.06 |
| E1 | GY   | 2A | AX.89609674 | 7.11E+07 | 0.32 | -2.42  | 3.06 | 0.06 |
| E1 | GY   | 2A | AX.89420289 | 7.10E+07 | 0.32 | -2.42  | 3.06 | 0.06 |

|    |    |    |             |          |      |       |      |      |
|----|----|----|-------------|----------|------|-------|------|------|
| E1 | GY | 2A | AX.89386633 | 7.12E+07 | 0.43 | -2.29 | 3.09 | 0.06 |
| E1 | GY | 2A | AX.89386633 | 7.12E+07 | 0.43 | -2.29 | 3.09 | 0.06 |
| E1 | GY | 2A | AX.89673116 | 7.16E+07 | 0.32 | -2.42 | 3.06 | 0.06 |
| E1 | GY | 2A | AX.89609674 | 7.11E+07 | 0.32 | -2.42 | 3.06 | 0.06 |
| E1 | GY | 2A | AX.89401600 | 7.13E+07 | 0.43 | -2.29 | 3.09 | 0.06 |
| E1 | GY | 2A | AX.89757261 | 7.69E+08 | 0.21 | -3.22 | 3.95 | 0.06 |
| E1 | GY | 2A | AX.89320118 | 6.12E+08 | 0.49 | -2.30 | 3.16 | 0.05 |
| E1 | GY | 2A | AX.89377760 | 8.45E+07 | 0.23 | -2.96 | 3.60 | 0.06 |
| E1 | GY | 2A | AX.89414077 | 8.46E+07 | 0.07 | -5.54 | 4.26 | 0.08 |
| E1 | GY | 2A | AX.89414077 | 8.46E+07 | 0.07 | -5.54 | 4.26 | 0.08 |
| E1 | GY | 2A | AX.89385952 | 7.15E+07 | 0.32 | -2.42 | 3.06 | 0.06 |
| E1 | GY | 2A | AX.89508461 | 8.56E+07 | 0.07 | -4.82 | 3.53 | 0.07 |
| E1 | GY | 2A | AX.89699881 | 7.14E+07 | 0.32 | -2.42 | 3.06 | 0.06 |
| E1 | GY | 2A | AX.89586153 | 7.10E+07 | 0.43 | -2.29 | 3.09 | 0.06 |
| E1 | GY | 2A | AX.89602806 | 8.46E+07 | 0.23 | -2.96 | 3.60 | 0.06 |
| E1 | GY | 2A | AX.89486476 | 7.59E+08 | 0.07 | -4.32 | 3.08 | 0.05 |
| E1 | GY | 2A | AX.89505306 | 7.16E+07 | 0.32 | -2.42 | 3.06 | 0.06 |
| E1 | GY | 2A | AX.89517936 | 7.10E+07 | 0.32 | -2.42 | 3.06 | 0.06 |
| E1 | GY | 2A | AX.89490792 | 7.14E+07 | 0.43 | -2.29 | 3.09 | 0.06 |
| E1 | GY | 2A | AX.89746110 | 6.12E+08 | 0.49 | -2.30 | 3.16 | 0.05 |
| E1 | GY | 2A | AX.89564635 | 7.16E+07 | 0.43 | -2.29 | 3.09 | 0.06 |
| E1 | GY | 2A | AX.89377760 | 8.45E+07 | 0.23 | -2.96 | 3.60 | 0.06 |
| E1 | GY | 2A | AX.89393559 | 7.16E+07 | 0.32 | -2.42 | 3.06 | 0.06 |
| E1 | GY | 2A | AX.89731305 | 7.56E+08 | 0.25 | -2.91 | 3.71 | 0.08 |
| E1 | GY | 2A | AX.89488613 | 8.56E+07 | 0.07 | -5.54 | 4.26 | 0.08 |
| E1 | GY | 2A | AX.89385952 | 7.15E+07 | 0.32 | -2.42 | 3.06 | 0.06 |
| E1 | GY | 2A | AX.89358971 | 8.42E+07 | 0.21 | -3.01 | 3.56 | 0.06 |
| E1 | GY | 2A | AX.89371398 | 7.10E+07 | 0.43 | -2.29 | 3.09 | 0.06 |
| E1 | GY | 2A | AX.89617723 | 8.41E+07 | 0.21 | -3.01 | 3.56 | 0.06 |
| E1 | GY | 2A | AX.89382939 | 8.63E+07 | 0.07 | -4.82 | 3.53 | 0.07 |
| E1 | GY | 2A | AX.89626514 | 7.61E+08 | 0.16 | 3.14  | 3.20 | 0.05 |
| E1 | GY | 2A | AX.89443555 | 7.56E+08 | 0.26 | -2.76 | 3.46 | 0.07 |
| E1 | GY | 2A | AX.89432407 | 8.56E+07 | 0.23 | -3.06 | 3.85 | 0.07 |
| E1 | GY | 2A | AX.89369312 | 8.46E+07 | 0.23 | -2.74 | 3.16 | 0.05 |
| E1 | GY | 2A | AX.89548461 | 7.16E+07 | 0.32 | -2.42 | 3.06 | 0.06 |
| E1 | GY | 2A | AX.89651445 | 8.39E+07 | 0.21 | -3.01 | 3.56 | 0.06 |
| E1 | GY | 2A | AX.89694875 | 7.11E+07 | 0.32 | -2.42 | 3.06 | 0.06 |
| E1 | GY | 2A | AX.89645117 | 7.13E+07 | 0.43 | -2.29 | 3.09 | 0.06 |
| E1 | GY | 2A | AX.89549784 | 8.53E+07 | 0.22 | -2.96 | 3.55 | 0.06 |
| E1 | GY | 2A | AX.89549784 | 8.53E+07 | 0.22 | -2.96 | 3.55 | 0.06 |
| E1 | GY | 2A | AX.89328431 | 8.39E+07 | 0.21 | -3.01 | 3.56 | 0.06 |
| E1 | GY | 2A | AX.89339520 | 8.39E+07 | 0.21 | -3.01 | 3.51 | 0.06 |
| E1 | GY | 2A | AX.89434520 | 8.39E+07 | 0.21 | -3.01 | 3.56 | 0.06 |
| E1 | GY | 2A | AX.89550729 | 7.14E+07 | 0.32 | -2.42 | 3.06 | 0.06 |
| E1 | GY | 2A | AX.89318649 | 6.12E+08 | 0.50 | 2.38  | 3.35 | 0.05 |
| E1 | GY | 2A | AX.89468956 | 8.39E+07 | 0.21 | -3.01 | 3.56 | 0.06 |
| E1 | GY | 2A | AX.89563662 | 6.78E+08 | 0.47 | 2.44  | 3.48 | 0.05 |
| E1 | GY | 2A | AX.89563662 | 6.78E+08 | 0.47 | 2.44  | 3.48 | 0.05 |
| E1 | GY | 2A | AX.89741076 | 7.86E+07 | 0.29 | 2.66  | 3.46 | 0.06 |
| E1 | GY | 2A | AX.89741076 | 7.86E+07 | 0.29 | 2.66  | 3.46 | 0.06 |

|    |    |    |             |          |      |       |      |      |
|----|----|----|-------------|----------|------|-------|------|------|
| E1 | GY | 2A | AX.89490792 | 7.14E+07 | 0.43 | -2.29 | 3.09 | 0.06 |
| E1 | GY | 2A | AX.89745955 | 8.46E+07 | 0.23 | -2.96 | 3.60 | 0.06 |
| E1 | GY | 2A | AX.89668676 | 7.16E+07 | 0.43 | -2.29 | 3.09 | 0.06 |
| E1 | GY | 2A | AX.89401600 | 7.13E+07 | 0.43 | -2.29 | 3.09 | 0.06 |
| E1 | GY | 2A | AX.89424726 | 8.50E+07 | 0.23 | -2.96 | 3.60 | 0.06 |
| E1 | GY | 2A | AX.89424726 | 8.50E+07 | 0.23 | -2.96 | 3.60 | 0.06 |
| E1 | GY | 2A | AX.89731305 | 7.56E+08 | 0.25 | -2.91 | 3.71 | 0.08 |
| E1 | GY | 2A | AX.89553523 | 8.63E+07 | 0.23 | -3.06 | 3.85 | 0.07 |
| E1 | GY | 2A | AX.89480595 | 8.56E+07 | 0.07 | -4.82 | 3.53 | 0.07 |
| E1 | GY | 2A | AX.89390161 | 7.14E+07 | 0.43 | -2.29 | 3.09 | 0.06 |
| E1 | GY | 2A | AX.89542301 | 7.59E+08 | 0.07 | -4.32 | 3.08 | 0.05 |
| E1 | GY | 2A | AX.89402644 | 8.45E+07 | 0.23 | -2.96 | 3.60 | 0.06 |
| E1 | GY | 2A | AX.89343847 | 8.50E+07 | 0.06 | -4.80 | 3.13 | 0.06 |
| E1 | GY | 2A | AX.89343847 | 8.50E+07 | 0.06 | -4.80 | 3.13 | 0.06 |
| E1 | GY | 2A | AX.89712759 | 8.50E+07 | 0.23 | -2.96 | 3.60 | 0.06 |
| E1 | GY | 2A | AX.89311260 | 7.14E+07 | 0.43 | -2.29 | 3.09 | 0.06 |
| E1 | GY | 2A | AX.89311260 | 7.14E+07 | 0.43 | -2.29 | 3.09 | 0.06 |
| E1 | GY | 2A | AX.89324170 | 7.69E+08 | 0.06 | -4.93 | 3.07 | 0.05 |
| E1 | GY | 2A | AX.89628287 | 8.42E+07 | 0.06 | -6.32 | 5.04 | 0.10 |
| E1 | GY | 2A | AX.89378004 | 8.39E+07 | 0.21 | -3.01 | 3.56 | 0.06 |
| E1 | GY | 2A | AX.89417730 | 7.14E+07 | 0.32 | -2.42 | 3.06 | 0.06 |
| E1 | GY | 2A | AX.89417730 | 7.14E+07 | 0.32 | -2.42 | 3.06 | 0.06 |
| E1 | GY | 2A | AX.89328431 | 8.39E+07 | 0.21 | -3.01 | 3.56 | 0.06 |
| E1 | GY | 2A | AX.89371398 | 7.10E+07 | 0.43 | -2.29 | 3.09 | 0.06 |
| E1 | GY | 2A | AX.89617723 | 8.41E+07 | 0.21 | -3.01 | 3.56 | 0.06 |
| E1 | GY | 2A | AX.89382126 | 7.10E+07 | 0.46 | -2.29 | 3.11 | 0.06 |
| E1 | GY | 2A | AX.89402644 | 8.45E+07 | 0.23 | -2.96 | 3.60 | 0.06 |
| E1 | GY | 2A | AX.89617767 | 7.14E+07 | 0.33 | -2.55 | 3.38 | 0.07 |
| E1 | GY | 2A | AX.89617811 | 3.59E+07 | 0.08 | 4.41  | 3.35 | 0.06 |
| E1 | GY | 2A | AX.89441861 | 3.59E+07 | 0.09 | 4.03  | 3.13 | 0.05 |
| E1 | GY | 2A | AX.89382605 | 6.12E+08 | 0.49 | -2.30 | 3.16 | 0.05 |
| E1 | GY | 2A | AX.89404168 | 6.23E+07 | 0.45 | -2.26 | 3.03 | 0.05 |
| E1 | GY | 2A | AX.89372788 | 7.40E+08 | 0.14 | 3.24  | 3.10 | 0.04 |
| E1 | GY | 2A | AX.89372788 | 7.40E+08 | 0.14 | 3.24  | 3.10 | 0.04 |
| E1 | GY | 2A | AX.89348730 | 8.50E+07 | 0.23 | -2.96 | 3.60 | 0.06 |
| E1 | GY | 2A | AX.89348730 | 8.50E+07 | 0.23 | -2.96 | 3.60 | 0.06 |
| E1 | GY | 2A | AX.89420289 | 7.10E+07 | 0.32 | -2.42 | 3.06 | 0.06 |
| E1 | GY | 2A | AX.89645117 | 7.13E+07 | 0.43 | -2.29 | 3.09 | 0.06 |
| E1 | GY | 2A | AX.89382126 | 7.10E+07 | 0.46 | -2.29 | 3.11 | 0.06 |
| E1 | GY | 2A | AX.89711069 | 7.14E+07 | 0.33 | -2.45 | 3.15 | 0.06 |
| E1 | GY | 2A | AX.89457808 | 7.69E+08 | 0.20 | -3.25 | 3.95 | 0.06 |
| E1 | GY | 2A | AX.89551770 | 8.39E+07 | 0.21 | -3.01 | 3.56 | 0.06 |
| E1 | GY | 2A | AX.89353071 | 8.49E+07 | 0.23 | -2.96 | 3.60 | 0.06 |
| E1 | GY | 2A | AX.89552048 | 8.39E+07 | 0.21 | -3.01 | 3.56 | 0.06 |
| E1 | GY | 2A | AX.89552048 | 8.39E+07 | 0.21 | -3.01 | 3.56 | 0.06 |
| E1 | GY | 2A | AX.89564635 | 7.16E+07 | 0.43 | -2.29 | 3.09 | 0.06 |
| E1 | GY | 2A | AX.89320349 | 8.79E+07 | 0.25 | -2.61 | 3.08 | 0.05 |
| E1 | GY | 2A | AX.89484946 | 6.78E+08 | 0.47 | 2.38  | 3.34 | 0.05 |
| E1 | GY | 2A | AX.89519604 | 7.14E+07 | 0.43 | -2.29 | 3.09 | 0.06 |
| E1 | GY | 2A | AX.89519604 | 7.14E+07 | 0.43 | -2.29 | 3.09 | 0.06 |

|    |     |    |             |          |      |       |      |      |
|----|-----|----|-------------|----------|------|-------|------|------|
| E1 | GY  | 2A | AX.89425537 | 8.42E+07 | 0.21 | -3.01 | 3.56 | 0.06 |
| E1 | GY  | 2A | AX.89747464 | 8.45E+07 | 0.07 | -5.54 | 4.26 | 0.08 |
| E1 | GY  | 2A | AX.89747464 | 8.45E+07 | 0.07 | -5.54 | 4.26 | 0.08 |
| E1 | GY  | 2A | AX.89699881 | 7.14E+07 | 0.32 | -2.42 | 3.06 | 0.06 |
| E1 | GY  | 2A | AX.89508618 | 8.56E+07 | 0.07 | -4.82 | 3.53 | 0.07 |
| E1 | GY  | 2A | AX.89654157 | 6.12E+08 | 0.49 | -2.30 | 3.16 | 0.05 |
| E1 | GY  | 2A | AX.89461565 | 8.50E+07 | 0.23 | -2.96 | 3.60 | 0.06 |
| E1 | GY  | 2A | AX.89737425 | 6.97E+08 | 0.12 | -3.56 | 3.12 | 0.05 |
| E1 | GY  | 2A | AX.89604444 | 7.14E+07 | 0.43 | -2.29 | 3.09 | 0.06 |
| E1 | GY  | 2A | AX.89393559 | 7.16E+07 | 0.32 | -2.42 | 3.06 | 0.06 |
| E1 | GY  | 2A | AX.89358971 | 8.42E+07 | 0.21 | -3.01 | 3.56 | 0.06 |
| E1 | GY  | 2A | AX.89395191 | 6.93E+08 | 0.17 | -3.93 | 4.83 | 0.08 |
| E1 | GY  | 2A | AX.89431192 | 7.14E+07 | 0.32 | -2.42 | 3.06 | 0.06 |
| E1 | GY  | 2A | AX.89431398 | 7.14E+07 | 0.43 | -2.29 | 3.09 | 0.06 |
| E1 | GY  | 2A | AX.89382939 | 8.63E+07 | 0.07 | -4.82 | 3.53 | 0.07 |
| E1 | GY  | 2A | AX.89372440 | 7.10E+07 | 0.43 | -2.29 | 3.09 | 0.06 |
| E1 | GY  | 2A | AX.89501387 | 8.39E+07 | 0.21 | -3.01 | 3.56 | 0.06 |
| E1 | GY  | 2A | AX.89569793 | 8.46E+07 | 0.07 | -5.54 | 4.26 | 0.08 |
| E1 | GY  | 2A | AX.89443555 | 7.56E+08 | 0.26 | -2.76 | 3.46 | 0.07 |
| E1 | GY  | 2A | AX.89454688 | 8.46E+07 | 0.23 | -2.96 | 3.60 | 0.06 |
| E1 | GY  | 2A | AX.89608550 | 8.46E+07 | 0.23 | -2.96 | 3.60 | 0.06 |
| E1 | GY  | 2A | AX.89455016 | 7.14E+07 | 0.43 | -2.29 | 3.09 | 0.06 |
| E1 | GY  | 2A | AX.89455016 | 7.14E+07 | 0.43 | -2.29 | 3.09 | 0.06 |
| E1 | GY  | 2A | AX.89670276 | 7.51E+08 | 0.06 | -5.10 | 3.47 | 0.07 |
| E1 | GY  | 2A | AX.89768688 | 8.39E+07 | 0.21 | -3.01 | 3.56 | 0.06 |
| E1 | GY  | 2A | AX.89610686 | 8.42E+07 | 0.06 | -5.37 | 3.80 | 0.07 |
| E1 | GY  | 2A | AX.89434520 | 8.39E+07 | 0.21 | -3.01 | 3.56 | 0.06 |
| E1 | GY  | 2A | AX.89434666 | 8.63E+07 | 0.23 | -3.06 | 3.85 | 0.07 |
| E1 | GY  | 2A | AX.89434666 | 8.63E+07 | 0.23 | -3.06 | 3.85 | 0.07 |
| E1 | GY  | 2A | AX.89505306 | 7.16E+07 | 0.32 | -2.42 | 3.06 | 0.06 |
| E1 | GY  | 2A | AX.89721986 | 8.63E+07 | 0.07 | -4.82 | 3.53 | 0.07 |
| E1 | GY  | 2A | AX.89673116 | 7.16E+07 | 0.32 | -2.42 | 3.06 | 0.06 |
| E1 | GY  | 2A | AX.89637021 | 8.46E+07 | 0.23 | -2.96 | 3.60 | 0.06 |
| E1 | GY  | 2A | AX.89495417 | 8.39E+07 | 0.21 | -3.01 | 3.56 | 0.06 |
| E1 | GY  | 2A | AX.89495968 | 7.69E+08 | 0.06 | -4.93 | 3.07 | 0.05 |
| E1 | GY  | 2A | AX.89390161 | 7.14E+07 | 0.43 | -2.29 | 3.09 | 0.06 |
| E1 | GY  | 2A | AX.89486476 | 7.59E+08 | 0.07 | -4.32 | 3.08 | 0.05 |
| E1 | GY  | 2A | AX.89737425 | 6.97E+08 | 0.12 | -3.56 | 3.12 | 0.05 |
| E1 | GY  | 2A | AX.89345178 | 7.14E+07 | 0.32 | -2.42 | 3.06 | 0.06 |
| E1 | GY  | 2A | AX.89775602 | 7.10E+07 | 0.32 | -2.42 | 3.06 | 0.06 |
| E1 | GY  | 2A | AX.89651445 | 8.39E+07 | 0.21 | -3.01 | 3.56 | 0.06 |
| E1 | GY  | 2A | AX.89463340 | 8.63E+07 | 0.23 | -3.06 | 3.85 | 0.07 |
| E1 | GPS | 2A | AX.89429150 | 7.47E+08 | 0.26 | 1.31  | 3.27 | 0.05 |
| E1 | GY  | 2A | AX.89704050 | 7.69E+08 | 0.20 | -3.25 | 3.95 | 0.06 |
| E1 | GY  | 2A | AX.89395191 | 6.93E+08 | 0.17 | -3.93 | 4.83 | 0.08 |
| E1 | GPS | 2A | AX.89426786 | 7.79E+08 | 0.21 | 1.39  | 3.20 | 0.06 |
| E1 | GPS | 2A | AX.89766512 | 7.78E+08 | 0.22 | 1.35  | 3.10 | 0.05 |
| E1 | GPS | 2A | AX.89531001 | 7.53E+08 | 0.28 | 1.26  | 3.18 | 0.05 |
| E1 | GPS | 2A | AX.89573905 | 7.55E+08 | 0.24 | 1.54  | 4.11 | 0.07 |
| E1 | GPS | 2A | AX.89706460 | 7.55E+08 | 0.21 | 1.53  | 3.75 | 0.07 |



|    |     |    |             |          |      |       |      |      |
|----|-----|----|-------------|----------|------|-------|------|------|
| E1 | GPS | 2A | AX.89771579 | 7.47E+08 | 0.21 | 1.36  | 3.11 | 0.05 |
| E1 | GPS | 2A | AX.89531704 | 7.78E+08 | 0.22 | 1.35  | 3.10 | 0.05 |
| E1 | GPS | 2A | AX.89562993 | 7.55E+08 | 0.26 | 1.39  | 3.62 | 0.06 |
| E1 | GY  | 2A | AX.89454688 | 8.46E+07 | 0.23 | -2.96 | 3.60 | 0.06 |
| E1 | GPS | 2A | AX.89592262 | 7.53E+08 | 0.41 | 1.23  | 3.56 | 0.06 |
| E1 | GPS | 2A | AX.89375933 | 7.55E+08 | 0.26 | 1.39  | 3.62 | 0.06 |
| E1 | GPS | 2A | AX.89347674 | 7.56E+08 | 0.26 | 1.41  | 3.70 | 0.06 |
| E1 | GY  | 2A | AX.89409852 | 7.76E+08 | 0.10 | -3.79 | 3.04 | 0.05 |
| E1 | GY  | 2A | AX.89409852 | 7.76E+08 | 0.10 | -3.79 | 3.04 | 0.05 |
| E1 | GPS | 2A | AX.89405293 | 7.47E+08 | 0.17 | 1.47  | 3.04 | 0.05 |
| E1 | GPS | 2A | AX.89468617 | 7.80E+08 | 0.20 | 1.42  | 3.20 | 0.06 |
| E1 | GPS | 2A | AX.89500632 | 5.08E+08 | 0.33 | 1.17  | 3.03 | 0.05 |
| E1 | GPS | 2A | AX.89583054 | 7.80E+08 | 0.21 | 1.39  | 3.20 | 0.06 |
| E1 | GPS | 2A | AX.89705282 | 5.11E+08 | 0.35 | 1.16  | 3.06 | 0.05 |
| E1 | GPS | 2A | AX.89534141 | 7.55E+08 | 0.27 | 1.49  | 4.19 | 0.07 |
| E1 | GY  | 2A | AX.89632373 | 8.45E+07 | 0.23 | -2.96 | 3.60 | 0.06 |
| E1 | GPS | 2A | AX.89705624 | 7.59E+08 | 0.17 | 1.67  | 3.77 | 0.07 |
| E1 | GPS | 2A | AX.89720303 | 7.60E+08 | 0.18 | 1.45  | 3.07 | 0.05 |
| E1 | GPS | 2A | AX.89413805 | 4.69E+08 | 0.33 | 1.26  | 3.46 | 0.06 |
| E1 | GY  | 2A | AX.89777060 | 8.39E+07 | 0.21 | -3.01 | 3.56 | 0.06 |
| E1 | GPS | 2A | AX.89487768 | 7.56E+08 | 0.24 | 1.42  | 3.59 | 0.06 |
| E1 | GPS | 2A | AX.89538795 | 7.78E+08 | 0.22 | 1.43  | 3.46 | 0.06 |
| E1 | GPS | 2A | AX.89688383 | 7.49E+08 | 0.23 | 1.47  | 3.74 | 0.07 |
| E1 | GPS | 2A | AX.89317553 | 7.78E+08 | 0.22 | 1.43  | 3.46 | 0.06 |
| E1 | GY  | 2A | AX.89754767 | 7.69E+08 | 0.06 | -4.93 | 3.07 | 0.05 |
| E1 | GY  | 2A | AX.89550729 | 7.14E+07 | 0.32 | -2.42 | 3.06 | 0.06 |
| E1 | GPS | 2A | AX.89660004 | 7.49E+08 | 0.23 | 1.49  | 3.76 | 0.07 |
| E1 | GY  | 2A | AX.89683882 | 6.78E+08 | 0.49 | 2.35  | 3.26 | 0.05 |
| E1 | GY  | 2A | AX.89683882 | 6.78E+08 | 0.49 | 2.35  | 3.26 | 0.05 |
| E1 | GPS | 2A | AX.89468552 | 7.79E+08 | 0.20 | 1.36  | 3.01 | 0.05 |
| E1 | GY  | 2A | AX.89551770 | 8.39E+07 | 0.21 | -3.01 | 3.56 | 0.06 |
| E1 | GPS | 2A | AX.89466785 | 7.14E+08 | 0.17 | 1.51  | 3.15 | 0.05 |
| E1 | GY  | 2A | AX.89668676 | 7.16E+07 | 0.43 | -2.29 | 3.09 | 0.06 |
| E1 | GY  | 2A | AX.89603203 | 7.59E+08 | 0.07 | -4.32 | 3.08 | 0.05 |
| E1 | GY  | 2A | AX.89684909 | 7.13E+07 | 0.32 | -2.42 | 3.06 | 0.06 |
| E1 | GPS | 2A | AX.89475404 | 5.17E+08 | 0.33 | 1.20  | 3.19 | 0.06 |
| E1 | GPS | 2A | AX.89668198 | 7.47E+08 | 0.21 | 1.36  | 3.11 | 0.05 |
| E1 | GPS | 2A | AX.89696276 | 5.23E+08 | 0.33 | 1.25  | 3.39 | 0.06 |
| E1 | GPS | 2A | AX.89752134 | 7.55E+08 | 0.26 | 1.43  | 3.76 | 0.07 |
| E1 | GPS | 2A | AX.89442869 | 7.55E+08 | 0.24 | 1.47  | 3.77 | 0.07 |
| E1 | GY  | 2A | AX.89484946 | 6.78E+08 | 0.47 | 2.38  | 3.34 | 0.05 |
| E1 | GPS | 2A | AX.89503320 | 7.78E+08 | 0.22 | 1.35  | 3.10 | 0.05 |
| E1 | GPS | 2A | AX.89622756 | 7.79E+08 | 0.20 | 1.36  | 3.01 | 0.05 |
| E1 | GPS | 2A | AX.89655826 | 5.11E+08 | 0.33 | 1.17  | 3.03 | 0.05 |
| E1 | GPS | 2A | AX.89397285 | 7.80E+08 | 0.20 | 1.42  | 3.20 | 0.06 |
| E1 | GPS | 2A | AX.89555442 | 4.35E+08 | 0.35 | 1.16  | 3.05 | 0.05 |
| E1 | GPS | 2A | AX.89520383 | 7.55E+08 | 0.34 | 1.48  | 4.65 | 0.08 |
| E1 | GY  | 2A | AX.89542461 | 6.93E+08 | 0.19 | -3.86 | 5.03 | 0.08 |
| E1 | GPS | 2A | AX.89685569 | 7.47E+08 | 0.20 | 1.54  | 3.64 | 0.06 |
| E1 | GPS | 2A | AX.89393215 | 7.56E+08 | 0.27 | 1.33  | 3.42 | 0.05 |

|    |     |    |             |          |      |       |      |      |
|----|-----|----|-------------|----------|------|-------|------|------|
| E1 | GPS | 2A | AX.89438787 | 7.55E+08 | 0.25 | 1.37  | 3.46 | 0.06 |
| E1 | GPS | 2A | AX.89457808 | 7.69E+08 | 0.20 | -1.54 | 3.75 | 0.06 |
| E1 | GPS | 2A | AX.89583185 | 7.55E+08 | 0.26 | 1.39  | 3.62 | 0.06 |
| E1 | GPS | 2A | AX.89737871 | 7.55E+08 | 0.24 | 1.47  | 3.77 | 0.07 |
| E1 | GY  | 2A | AX.89700088 | 8.56E+07 | 0.23 | -3.05 | 3.80 | 0.07 |
| E1 | GY  | 2A | AX.89700088 | 8.56E+07 | 0.23 | -3.05 | 3.80 | 0.07 |
| E1 | GY  | 2A | AX.89712759 | 8.50E+07 | 0.23 | -2.96 | 3.60 | 0.06 |
| E1 | GY  | 2A | AX.89450281 | 8.53E+07 | 0.22 | -3.11 | 3.88 | 0.07 |
| E1 | GY  | 2A | AX.89450281 | 8.53E+07 | 0.22 | -3.11 | 3.88 | 0.07 |
| E1 | GPS | 2A | AX.89771558 | 5.10E+08 | 0.32 | 1.22  | 3.23 | 0.06 |
| E1 | GPS | 2A | AX.89402750 | 7.79E+08 | 0.20 | 1.36  | 3.01 | 0.05 |
| E1 | GY  | 2A | AX.89654157 | 6.12E+08 | 0.49 | -2.30 | 3.16 | 0.05 |
| E1 | GPS | 2A | AX.89526331 | 7.78E+08 | 0.22 | 1.35  | 3.10 | 0.05 |
| E1 | GPS | 2A | AX.89778038 | 7.79E+08 | 0.21 | 1.39  | 3.20 | 0.06 |
| E1 | GPS | 2A | AX.89604366 | 5.17E+08 | 0.33 | 1.20  | 3.19 | 0.06 |
| E1 | GPS | 2A | AX.89561705 | 7.80E+08 | 0.20 | 1.42  | 3.20 | 0.06 |
| E1 | GPS | 2A | AX.89445758 | 7.79E+08 | 0.20 | 1.36  | 3.01 | 0.05 |
| E1 | GY  | 2A | AX.89569793 | 8.46E+07 | 0.07 | -5.54 | 4.26 | 0.08 |
| E1 | GPS | 2A | AX.89750014 | 5.08E+08 | 0.32 | 1.20  | 3.12 | 0.05 |
| E1 | GPS | 2A | AX.89636460 | 7.55E+08 | 0.26 | 1.43  | 3.76 | 0.07 |
| E1 | GPS | 2A | AX.89314076 | 7.78E+08 | 0.22 | 1.35  | 3.10 | 0.05 |
| E1 | GPS | 2A | AX.89522390 | 7.78E+08 | 0.22 | 1.35  | 3.10 | 0.05 |
| E1 | GY  | 2A | AX.89543557 | 8.49E+07 | 0.23 | -2.96 | 3.60 | 0.06 |
| E1 | GPS | 2A | AX.89668955 | 7.56E+08 | 0.25 | 1.40  | 3.54 | 0.06 |
| E1 | GPS | 2A | AX.89637508 | 7.55E+08 | 0.27 | 1.43  | 3.86 | 0.07 |
| E1 | GPS | 2A | AX.89483920 | 5.18E+08 | 0.34 | 1.27  | 3.53 | 0.06 |
| E1 | GPS | 2A | AX.89696493 | 5.18E+08 | 0.33 | 1.20  | 3.19 | 0.06 |
| E1 | GPS | 2A | AX.89527155 | 7.78E+08 | 0.22 | 1.35  | 3.10 | 0.05 |
| E1 | GY  | 2A | AX.89429525 | 8.42E+07 | 0.07 | -5.54 | 4.26 | 0.08 |
| E1 | GY  | 2A | AX.89429525 | 8.42E+07 | 0.07 | -5.54 | 4.26 | 0.08 |
| E1 | GPS | 2A | AX.89441296 | 7.55E+08 | 0.26 | 1.39  | 3.62 | 0.06 |
| E1 | GPS | 2A | AX.89530131 | 7.55E+08 | 0.27 | 1.43  | 3.86 | 0.07 |
| E1 | GY  | 2A | AX.89666189 | 7.10E+07 | 0.32 | -2.42 | 3.06 | 0.06 |
| E1 | GY  | 2A | AX.89666189 | 7.10E+07 | 0.32 | -2.42 | 3.06 | 0.06 |
| E1 | GPS | 2A | AX.89355132 | 5.15E+08 | 0.32 | 1.17  | 3.01 | 0.05 |
| E1 | GY  | 2A | AX.89617767 | 7.14E+07 | 0.33 | -2.55 | 3.38 | 0.07 |
| E1 | GY  | 2A | AX.89452906 | 8.64E+07 | 0.23 | -3.05 | 3.80 | 0.07 |
| E1 | GY  | 2A | AX.89313648 | 3.12E+07 | 0.10 | 3.84  | 3.22 | 0.05 |
| E1 | GY  | 2A | AX.89654740 | 1.07E+08 | 0.13 | -3.29 | 3.04 | 0.04 |
| E1 | GPS | 2A | AX.89372948 | 7.79E+08 | 0.20 | 1.38  | 3.05 | 0.05 |
| E1 | GPS | 2A | AX.89414865 | 7.55E+08 | 0.24 | 1.50  | 3.95 | 0.07 |
| E1 | GPS | 2A | AX.89316671 | 7.47E+08 | 0.26 | 1.31  | 3.27 | 0.05 |
| E1 | GY  | 2A | AX.89704050 | 7.69E+08 | 0.20 | -3.25 | 3.95 | 0.06 |
| E1 | GY  | 2A | AX.89382605 | 6.12E+08 | 0.49 | -2.30 | 3.16 | 0.05 |
| E1 | GPS | 2A | AX.89423191 | 7.55E+08 | 0.26 | 1.39  | 3.62 | 0.06 |
| E1 | GY  | 2A | AX.89431192 | 7.14E+07 | 0.32 | -2.42 | 3.06 | 0.06 |
| E1 | GPS | 2A | AX.89609963 | 4.39E+08 | 0.34 | 1.18  | 3.12 | 0.05 |
| E1 | GPS | 2A | AX.89504090 | 5.23E+08 | 0.33 | 1.20  | 3.19 | 0.06 |
| E1 | GPS | 2A | AX.89772957 | 5.11E+08 | 0.33 | 1.17  | 3.03 | 0.05 |
| E1 | GPS | 2A | AX.89747863 | 7.55E+08 | 0.27 | 1.39  | 3.71 | 0.06 |

|    |     |    |             |          |      |       |      |      |
|----|-----|----|-------------|----------|------|-------|------|------|
| E1 | GY  | 2A | AX.89336730 | 7.40E+08 | 0.09 | -4.19 | 3.34 | 0.05 |
| E1 | GPS | 2A | AX.89513724 | 7.55E+08 | 0.24 | 1.47  | 3.77 | 0.07 |
| E1 | GY  | 2A | AX.89618874 | 8.56E+07 | 0.07 | -4.82 | 3.53 | 0.07 |
| E1 | GPS | 2A | AX.89591770 | 7.56E+08 | 0.24 | 1.41  | 3.58 | 0.06 |
| E1 | GPS | 2A | AX.89660639 | 5.11E+08 | 0.33 | 1.17  | 3.03 | 0.05 |
| E1 | GPS | 2A | AX.89646006 | 7.56E+08 | 0.26 | 1.41  | 3.70 | 0.06 |
| E1 | GPS | 2A | AX.89530584 | 7.56E+08 | 0.26 | 1.41  | 3.70 | 0.06 |
| E1 | GY  | 2A | AX.89716272 | 7.14E+07 | 0.32 | -2.42 | 3.06 | 0.06 |
| E1 | GY  | 2A | AX.89610686 | 8.42E+07 | 0.06 | -5.37 | 3.80 | 0.07 |
| E1 | GY  | 2A | AX.89711069 | 7.14E+07 | 0.33 | -2.45 | 3.15 | 0.06 |
| E1 | GY  | 2A | AX.89352998 | 7.11E+07 | 0.32 | -2.42 | 3.06 | 0.06 |
| E1 | GY  | 2A | AX.89693178 | 7.88E+07 | 0.29 | 2.48  | 3.06 | 0.05 |
| E1 | GY  | 2A | AX.89693178 | 7.88E+07 | 0.29 | 2.48  | 3.06 | 0.05 |
| E1 | GY  | 2A | AX.89513541 | 7.58E+08 | 0.06 | -4.93 | 3.08 | 0.05 |
| E1 | GY  | 2A | AX.89513541 | 7.58E+08 | 0.06 | -4.93 | 3.08 | 0.05 |
| E1 | GY  | 2A | AX.89353712 | 8.63E+07 | 0.24 | -2.84 | 3.44 | 0.06 |
| E1 | GY  | 2A | AX.89495219 | 8.50E+07 | 0.23 | -2.96 | 3.60 | 0.06 |
| E1 | GPS | 2A | AX.89742627 | 7.54E+08 | 0.21 | 1.58  | 3.99 | 0.07 |
| E1 | GY  | 2A | AX.89320349 | 8.79E+07 | 0.25 | -2.61 | 3.08 | 0.05 |
| E1 | GY  | 2A | AX.89531056 | 8.45E+07 | 0.23 | -2.96 | 3.60 | 0.06 |
| E1 | GY  | 2A | AX.89531056 | 8.45E+07 | 0.23 | -2.96 | 3.60 | 0.06 |
| E1 | GY  | 2A | AX.89425537 | 8.42E+07 | 0.21 | -3.01 | 3.56 | 0.06 |
| E1 | GY  | 2A | AX.89633157 | 6.12E+08 | 0.49 | -2.30 | 3.16 | 0.05 |
| E1 | GY  | 2A | AX.89633157 | 6.12E+08 | 0.49 | -2.30 | 3.16 | 0.05 |
| E1 | GY  | 2A | AX.89602806 | 8.46E+07 | 0.23 | -2.96 | 3.60 | 0.06 |
| E1 | GPS | 2A | AX.89697822 | 7.80E+08 | 0.20 | 1.42  | 3.20 | 0.06 |
| E1 | GY  | 2A | AX.89728140 | 6.78E+08 | 0.49 | 2.35  | 3.26 | 0.05 |
| E1 | GPS | 2A | AX.89344976 | 7.56E+08 | 0.28 | 1.32  | 3.49 | 0.06 |
| E1 | GPS | 2A | AX.89771272 | 7.55E+08 | 0.24 | 1.42  | 3.62 | 0.06 |
| E1 | GY  | 2A | AX.89487119 | 1.16E+08 | 0.14 | -3.26 | 3.13 | 0.05 |
| E1 | GY  | 2A | AX.89487119 | 1.16E+08 | 0.14 | -3.26 | 3.13 | 0.05 |
| E1 | GY  | 2A | AX.89345178 | 7.14E+07 | 0.32 | -2.42 | 3.06 | 0.06 |
| E1 | GY  | 2A | AX.89604444 | 7.14E+07 | 0.43 | -2.29 | 3.09 | 0.06 |
| E1 | GPS | 2A | AX.89632739 | 7.47E+08 | 0.26 | 1.31  | 3.27 | 0.05 |
| E1 | GY  | 2A | AX.89488613 | 8.56E+07 | 0.07 | -5.54 | 4.26 | 0.08 |
| E1 | GY  | 2A | AX.89425114 | 8.46E+07 | 0.23 | -2.96 | 3.60 | 0.06 |
| E1 | GY  | 2A | AX.89425114 | 8.46E+07 | 0.23 | -2.96 | 3.60 | 0.06 |
| E1 | GY  | 2A | AX.89750786 | 8.46E+07 | 0.23 | -2.96 | 3.60 | 0.06 |
| E1 | GPS | 2A | AX.89322846 | 7.80E+08 | 0.20 | 1.42  | 3.20 | 0.06 |
| E1 | GY  | 2A | AX.89743990 | 6.78E+08 | 0.47 | 2.44  | 3.48 | 0.05 |
| E1 | GY  | 2A | AX.89743990 | 6.78E+08 | 0.47 | 2.44  | 3.48 | 0.05 |
| E1 | GY  | 2A | AX.89617811 | 3.59E+07 | 0.08 | 4.41  | 3.35 | 0.06 |
| E1 | GY  | 2A | AX.89463683 | 7.10E+07 | 0.32 | -2.42 | 3.06 | 0.06 |
| E1 | GY  | 2A | AX.89463683 | 7.10E+07 | 0.32 | -2.42 | 3.06 | 0.06 |
| E1 | GY  | 2A | AX.89704676 | 7.61E+08 | 0.07 | -4.27 | 3.02 | 0.05 |
| E1 | GY  | 2A | AX.89704676 | 7.61E+08 | 0.07 | -4.27 | 3.02 | 0.05 |
| E1 | GY  | 2A | AX.89618874 | 8.56E+07 | 0.07 | -4.82 | 3.53 | 0.07 |
| E1 | GY  | 2A | AX.89608550 | 8.46E+07 | 0.23 | -2.96 | 3.60 | 0.06 |
| E1 | GY  | 2A | AX.89690258 | 7.14E+07 | 0.32 | -2.42 | 3.06 | 0.06 |
| E1 | GY  | 2A | AX.89706225 | 8.42E+07 | 0.07 | -5.54 | 4.26 | 0.08 |

|    |      |    |             |          |      |          |      |      |
|----|------|----|-------------|----------|------|----------|------|------|
| E1 | GY   | 2A | AX.89480595 | 8.56E+07 | 0.07 | -4.82    | 3.53 | 0.07 |
| E1 | GY   | 2A | AX.89364039 | 1.20E+07 | 0.32 | -2.70    | 3.68 | 0.05 |
| E1 | GY   | 2A | AX.89364039 | 1.20E+07 | 0.32 | -2.70    | 3.68 | 0.05 |
| E1 | GPM2 | 2A | AX.89444397 | 7.79E+08 | 0.27 | 776.28   | 4.11 | 0.07 |
| E1 | GPM2 | 2A | AX.89342993 | 6.15E+07 | 0.21 | 812.89   | 3.79 | 0.07 |
| E1 | GPM2 | 2A | AX.89314076 | 7.78E+08 | 0.22 | 837.88   | 4.11 | 0.07 |
| E1 | GPM2 | 2A | AX.89403340 | 7.79E+08 | 0.20 | 860.25   | 4.06 | 0.07 |
| E1 | GPM2 | 2A | AX.89317187 | 7.59E+08 | 0.20 | 852.43   | 4.06 | 0.07 |
| E1 | GY   | 2A | AX.89702562 | 7.10E+07 | 0.32 | -2.42    | 3.06 | 0.06 |
| E1 | GY   | 2A | AX.89702562 | 7.10E+07 | 0.32 | -2.42    | 3.06 | 0.06 |
| E1 | GPM2 | 2A | AX.89424974 | 5.84E+07 | 0.31 | 755.44   | 4.18 | 0.07 |
| E1 | GPM2 | 2A | AX.89456578 | 7.79E+08 | 0.20 | 857.07   | 3.98 | 0.07 |
| E1 | GY   | 2A | AX.89495968 | 7.69E+08 | 0.06 | -4.93    | 3.07 | 0.05 |
| E1 | GPM2 | 2A | AX.89404168 | 6.23E+07 | 0.45 | -706.11  | 4.21 | 0.07 |
| E1 | GPM2 | 2A | AX.89490527 | 7.78E+08 | 0.25 | 692.95   | 3.18 | 0.06 |
| E1 | GPM2 | 2A | AX.89345178 | 7.14E+07 | 0.32 | -650.04  | 3.27 | 0.06 |
| E1 | GPM2 | 2A | AX.89666189 | 7.10E+07 | 0.32 | -650.04  | 3.27 | 0.06 |
| E1 | GPM2 | 2A | AX.89437001 | 6.04E+08 | 0.08 | -1224.91 | 3.97 | 0.07 |
| E1 | GPM2 | 2A | AX.89328431 | 8.39E+07 | 0.21 | -709.87  | 3.05 | 0.05 |
| E1 | GPM2 | 2A | AX.89673116 | 7.16E+07 | 0.32 | -650.04  | 3.27 | 0.06 |
| E1 | GPM2 | 2A | AX.89377760 | 8.45E+07 | 0.23 | -710.38  | 3.17 | 0.05 |
| E1 | GPM2 | 2A | AX.89443303 | 7.69E+08 | 0.17 | -833.87  | 3.48 | 0.06 |
| E1 | GPM2 | 2A | AX.89377709 | 7.59E+08 | 0.20 | 852.43   | 4.06 | 0.07 |
| E1 | GPM2 | 2A | AX.89331385 | 7.59E+08 | 0.20 | 852.43   | 4.06 | 0.07 |
| E1 | GPM2 | 2A | AX.89495219 | 8.50E+07 | 0.23 | -710.38  | 3.17 | 0.05 |
| E1 | GPM2 | 2A | AX.89670101 | 7.88E+07 | 0.42 | -605.90  | 3.19 | 0.06 |
| E1 | GPM2 | 2A | AX.89526852 | 7.61E+08 | 0.20 | 888.57   | 4.30 | 0.08 |
| E1 | GPM2 | 2A | AX.89451642 | 7.59E+08 | 0.20 | 852.43   | 4.06 | 0.07 |
| E1 | GPM2 | 2A | AX.89451573 | 7.60E+08 | 0.19 | 943.55   | 4.55 | 0.08 |
| E1 | GPM2 | 2A | AX.89578308 | 7.60E+08 | 0.20 | 852.43   | 4.06 | 0.07 |
| E1 | GPM2 | 2A | AX.89575538 | 7.55E+08 | 0.26 | 695.37   | 3.27 | 0.06 |
| E1 | GPM2 | 2A | AX.89550729 | 7.14E+07 | 0.32 | -650.04  | 3.27 | 0.06 |
| E1 | GPM2 | 2A | AX.89736779 | 7.58E+08 | 0.23 | 735.98   | 3.41 | 0.06 |
| E1 | GPM2 | 2A | AX.89473575 | 7.80E+08 | 0.21 | 948.49   | 4.97 | 0.09 |
| E1 | GPM2 | 2A | AX.89747464 | 8.45E+07 | 0.07 | -1294.07 | 3.57 | 0.07 |
| E1 | GPM2 | 2A | AX.89697822 | 7.80E+08 | 0.20 | 927.23   | 4.64 | 0.08 |
| E1 | GPM2 | 2A | AX.89646989 | 7.58E+08 | 0.22 | 732.77   | 3.30 | 0.06 |
| E1 | GY   | 2A | AX.89677955 | 8.42E+07 | 0.20 | -3.03    | 3.45 | 0.06 |
| E1 | GPM2 | 2A | AX.89530582 | 7.59E+08 | 0.20 | 852.43   | 4.06 | 0.07 |
| E1 | GY   | 2A | AX.89775602 | 7.10E+07 | 0.32 | -2.42    | 3.06 | 0.06 |
| E1 | GPM2 | 2A | AX.89594346 | 1.94E+08 | 0.48 | 671.35   | 3.89 | 0.07 |
| E1 | GPM2 | 2A | AX.89586153 | 7.10E+07 | 0.43 | -647.67  | 3.60 | 0.07 |
| E1 | GPM2 | 2A | AX.89393559 | 7.16E+07 | 0.32 | -650.04  | 3.27 | 0.06 |
| E1 | GPM2 | 2A | AX.89376021 | 7.79E+08 | 0.19 | 777.68   | 3.31 | 0.06 |
| E1 | GPM2 | 2A | AX.89623731 | 7.80E+08 | 0.20 | 905.56   | 4.51 | 0.08 |
| E1 | GPM2 | 2A | AX.89537540 | 7.60E+08 | 0.20 | 852.43   | 4.06 | 0.07 |
| E1 | GPM2 | 2A | AX.89530584 | 7.56E+08 | 0.26 | 695.68   | 3.27 | 0.04 |
| E1 | GPM2 | 2A | AX.89522390 | 7.78E+08 | 0.22 | 837.88   | 4.11 | 0.07 |
| E1 | GPM2 | 2A | AX.89553538 | 6.04E+08 | 0.09 | -1132.54 | 3.76 | 0.07 |
| E1 | GPM2 | 2A | AX.89413222 | 7.80E+08 | 0.21 | 948.49   | 4.97 | 0.09 |

|    |      |    |             |          |      |          |      |      |
|----|------|----|-------------|----------|------|----------|------|------|
| E1 | GPM2 | 2A | AX.89577627 | 7.56E+08 | 0.27 | 680.27   | 3.21 | 0.05 |
| E1 | GY   | 2A | AX.89442084 | 7.16E+07 | 0.32 | -2.42    | 3.06 | 0.06 |
| E1 | GY   | 2A | AX.89442084 | 7.16E+07 | 0.32 | -2.42    | 3.06 | 0.06 |
| E1 | GPS  | 2A | AX.89539167 | 7.55E+08 | 0.27 | 1.39     | 3.71 | 0.06 |
| E1 | GPM2 | 2A | AX.89727692 | 7.80E+08 | 0.20 | 927.23   | 4.64 | 0.08 |
| E1 | GPS  | 2A | AX.89380933 | 5.16E+08 | 0.34 | 1.18     | 3.10 | 0.05 |
| E1 | GPM2 | 2A | AX.89421305 | 7.60E+08 | 0.20 | 888.57   | 4.30 | 0.08 |
| E1 | GPM2 | 2A | AX.89330025 | 6.04E+08 | 0.09 | -1132.54 | 3.76 | 0.07 |
| E1 | GPS  | 2A | AX.89698182 | 5.08E+08 | 0.33 | 1.20     | 3.16 | 0.05 |
| E1 | GY   | 2A | AX.89536127 | 7.69E+08 | 0.06 | -4.93    | 3.07 | 0.05 |
| E1 | GPS  | 2A | AX.89750010 | 7.56E+08 | 0.26 | 1.36     | 3.50 | 0.06 |
| E1 | GPS  | 2A | AX.89614700 | 7.78E+08 | 0.22 | 1.35     | 3.10 | 0.05 |
| E1 | GPS  | 2A | AX.89534203 | 7.54E+08 | 0.25 | 1.67     | 4.87 | 0.08 |
| E1 | GY   | 2A | AX.89626514 | 7.61E+08 | 0.16 | 3.14     | 3.20 | 0.05 |
| E1 | GPS  | 2A | AX.89689821 | 7.55E+08 | 0.24 | 1.37     | 3.37 | 0.06 |
| E1 | GPS  | 2A | AX.89332830 | 4.50E+08 | 0.34 | 1.21     | 3.26 | 0.06 |
| E1 | GY   | 2A | AX.89408757 | 7.11E+07 | 0.43 | -2.29    | 3.09 | 0.06 |
| E1 | GPS  | 2A | AX.89390818 | 7.49E+08 | 0.24 | 1.53     | 4.10 | 0.07 |
| E1 | GPM2 | 2A | AX.89592705 | 7.12E+07 | 0.43 | -649.06  | 3.61 | 0.07 |
| E1 | GPM2 | 2A | AX.89706225 | 8.42E+07 | 0.07 | -1294.07 | 3.57 | 0.07 |
| E1 | GPM2 | 2A | AX.89444536 | 7.78E+08 | 0.22 | 837.88   | 4.11 | 0.07 |
| E1 | GPM2 | 2A | AX.89542461 | 6.93E+08 | 0.19 | -831.67  | 3.65 | 0.06 |
| E1 | GPS  | 2A | AX.89456234 | 5.11E+08 | 0.33 | 1.17     | 3.03 | 0.05 |
| E1 | GPM2 | 2A | AX.89580710 | 7.61E+08 | 0.20 | 888.57   | 4.30 | 0.08 |
| E1 | GPS  | 2A | AX.89389950 | 6.89E+08 | 0.31 | -1.36    | 3.80 | 0.06 |
| E1 | GY   | 2A | AX.89548461 | 7.16E+07 | 0.32 | -2.42    | 3.06 | 0.06 |
| E1 | GPS  | 2A | AX.89444536 | 7.78E+08 | 0.22 | 1.35     | 3.10 | 0.05 |
| E1 | GPS  | 2A | AX.89513185 | 7.55E+08 | 0.23 | 1.41     | 3.46 | 0.06 |
| E1 | GPS  | 2A | AX.89486496 | 7.47E+08 | 0.21 | 1.36     | 3.11 | 0.05 |
| E1 | GPM2 | 2A | AX.89516661 | 7.56E+08 | 0.27 | 677.79   | 3.25 | 0.04 |
| E1 | GPM2 | 2A | AX.89674991 | 7.78E+08 | 0.21 | 748.03   | 3.29 | 0.06 |
| E1 | GPS  | 2A | AX.89627848 | 7.78E+08 | 0.25 | 1.42     | 3.70 | 0.07 |
| E1 | GY   | 2A | AX.89479590 | 7.14E+07 | 0.32 | -2.42    | 3.06 | 0.06 |
| E1 | GPM2 | 2A | AX.89765361 | 7.53E+08 | 0.10 | 975.50   | 3.13 | 0.05 |
| E1 | GPS  | 2A | AX.89473575 | 7.80E+08 | 0.21 | 1.39     | 3.20 | 0.06 |
| E1 | GPS  | 2A | AX.89492742 | 7.80E+08 | 0.20 | 1.42     | 3.20 | 0.06 |
| E1 | GPM2 | 2A | AX.89770934 | 6.04E+08 | 0.09 | -1132.54 | 3.76 | 0.07 |
| E1 | GPS  | 2A | AX.89447705 | 5.23E+08 | 0.33 | 1.20     | 3.19 | 0.06 |
| E1 | GY   | 2A | AX.89632373 | 8.45E+07 | 0.23 | -2.96    | 3.60 | 0.06 |
| E1 | GPS  | 2A | AX.89488337 | 7.55E+08 | 0.30 | 1.33     | 3.61 | 0.06 |
| E1 | GPM2 | 2A | AX.89349994 | 7.61E+08 | 0.20 | 888.57   | 4.30 | 0.08 |
| E1 | GPS  | 2A | AX.89334194 | 6.03E+08 | 0.11 | -1.84    | 3.21 | 0.05 |
| E1 | GPS  | 2A | AX.89365566 | 7.55E+08 | 0.26 | 1.39     | 3.62 | 0.06 |
| E1 | GPS  | 2A | AX.89613544 | 7.78E+08 | 0.22 | 1.35     | 3.10 | 0.05 |
| E1 | GPM2 | 2A | AX.89555762 | 7.11E+07 | 0.43 | -649.06  | 3.61 | 0.07 |
| E1 | GPS  | 2A | AX.89373981 | 7.50E+08 | 0.44 | 1.15     | 3.24 | 0.06 |
| E1 | GPS  | 2A | AX.89354221 | 7.56E+08 | 0.25 | 1.40     | 3.54 | 0.06 |
| E1 | GPS  | 2A | AX.89683066 | 4.26E+08 | 0.34 | 1.21     | 3.25 | 0.06 |
| E1 | GPM2 | 2A | AX.89684825 | 5.96E+07 | 0.20 | 761.94   | 3.34 | 0.05 |
| E1 | GPM2 | 2A | AX.89668955 | 7.56E+08 | 0.25 | 699.99   | 3.24 | 0.05 |

|    |      |    |             |          |      |          |      |      |
|----|------|----|-------------|----------|------|----------|------|------|
| E1 | GPS  | 2A | AX.89523901 | 7.78E+08 | 0.22 | 1.35     | 3.10 | 0.05 |
| E1 | GPM2 | 2A | AX.89610255 | 7.55E+08 | 0.27 | 686.53   | 3.26 | 0.05 |
| E1 | GPM2 | 2A | AX.89534203 | 7.54E+08 | 0.25 | 819.14   | 4.25 | 0.06 |
| E1 | GPS  | 2A | AX.89670038 | 5.24E+08 | 0.33 | 1.20     | 3.19 | 0.06 |
| E1 | GPS  | 2A | AX.89370001 | 7.47E+08 | 0.17 | 1.47     | 3.04 | 0.05 |
| E1 | GPM2 | 2A | AX.89762459 | 7.55E+08 | 0.27 | 683.92   | 3.30 | 0.05 |
| E1 | GPS  | 2A | AX.89390483 | 4.73E+08 | 0.33 | 1.26     | 3.46 | 0.06 |
| E1 | GPM2 | 2A | AX.89530131 | 7.55E+08 | 0.27 | 686.53   | 3.26 | 0.05 |
| E1 | GPS  | 2A | AX.89580653 | 7.55E+08 | 0.24 | 1.54     | 4.11 | 0.07 |
| E1 | GPS  | 2A | AX.89625773 | 7.80E+08 | 0.20 | 1.42     | 3.20 | 0.06 |
| E1 | GPM2 | 2A | AX.89496259 | 7.78E+08 | 0.22 | 870.13   | 4.45 | 0.08 |
| E1 | GPM2 | 2A | AX.89589865 | 5.96E+07 | 0.18 | 906.76   | 4.17 | 0.07 |
| E1 | GY   | 2A | AX.89754767 | 7.69E+08 | 0.06 | -4.93    | 3.07 | 0.05 |
| E1 | GPM2 | 2A | AX.89542988 | 1.92E+08 | 0.48 | 671.35   | 3.89 | 0.07 |
| E1 | GPM2 | 2A | AX.89752134 | 7.55E+08 | 0.26 | 695.37   | 3.27 | 0.06 |
| E1 | GPM2 | 2A | AX.89769129 | 7.78E+08 | 0.22 | 837.88   | 4.11 | 0.07 |
| E1 | GPS  | 2A | AX.89769129 | 7.78E+08 | 0.22 | 1.35     | 3.10 | 0.05 |
| E1 | GPS  | 2A | AX.89492216 | 4.39E+08 | 0.34 | 1.18     | 3.12 | 0.05 |
| E1 | GPS  | 2A | AX.89619827 | 7.56E+08 | 0.27 | 1.33     | 3.42 | 0.05 |
| E1 | GPS  | 2A | AX.89353495 | 4.57E+08 | 0.34 | 1.37     | 4.02 | 0.07 |
| E1 | GPS  | 2A | AX.89769977 | 5.16E+08 | 0.33 | 1.20     | 3.19 | 0.06 |
| E1 | GPS  | 2A | AX.89464823 | 5.10E+08 | 0.33 | 1.28     | 3.56 | 0.06 |
| E1 | GPM2 | 2A | AX.89737871 | 7.55E+08 | 0.24 | 717.69   | 3.31 | 0.06 |
| E1 | GPS  | 2A | AX.89761868 | 7.56E+08 | 0.27 | 1.33     | 3.42 | 0.05 |
| E1 | GPS  | 2A | AX.89588999 | 7.55E+08 | 0.26 | 1.33     | 3.32 | 0.06 |
| E1 | GPS  | 2A | AX.89722052 | 7.79E+08 | 0.20 | 1.35     | 3.00 | 0.05 |
| E1 | GPS  | 2A | AX.89658500 | 7.55E+08 | 0.29 | 1.36     | 3.74 | 0.06 |
| E1 | GPM2 | 2A | AX.89451547 | 6.15E+07 | 0.22 | 803.47   | 3.82 | 0.07 |
| E1 | GPS  | 2A | AX.89620594 | 4.68E+08 | 0.34 | 1.21     | 3.26 | 0.06 |
| E1 | GPM2 | 2A | AX.89397007 | 7.60E+08 | 0.20 | 852.43   | 4.06 | 0.07 |
| E1 | GPM2 | 2A | AX.89705764 | 7.58E+08 | 0.23 | 735.98   | 3.41 | 0.06 |
| E1 | GPM2 | 2A | AX.89466371 | 6.04E+08 | 0.08 | -1224.91 | 3.97 | 0.07 |
| E1 | GPM2 | 2A | AX.89413417 | 7.55E+08 | 0.26 | 695.37   | 3.27 | 0.06 |
| E1 | GPM2 | 2A | AX.89651445 | 8.39E+07 | 0.21 | -709.87  | 3.05 | 0.05 |
| E1 | GPS  | 2A | AX.89332055 | 7.56E+08 | 0.25 | 1.40     | 3.54 | 0.06 |
| E1 | GPS  | 2A | AX.89727692 | 7.80E+08 | 0.20 | 1.42     | 3.20 | 0.06 |
| E1 | GPS  | 2A | AX.89565907 | 5.16E+08 | 0.33 | 1.20     | 3.19 | 0.06 |
| E1 | GPS  | 2A | AX.89623731 | 7.80E+08 | 0.20 | 1.36     | 3.01 | 0.05 |
| E1 | GPS  | 2A | AX.89408055 | 7.55E+08 | 0.26 | 1.39     | 3.62 | 0.06 |
| E1 | GPM2 | 2A | AX.89690258 | 7.14E+07 | 0.32 | -650.04  | 3.27 | 0.06 |
| E1 | GY   | 2A | AX.89603203 | 7.59E+08 | 0.07 | -4.32    | 3.08 | 0.05 |
| E1 | GPS  | 2A | AX.89709153 | 5.16E+08 | 0.33 | 1.20     | 3.19 | 0.06 |
| E1 | GPS  | 2A | AX.89744225 | 5.24E+08 | 0.34 | 1.19     | 3.16 | 0.05 |
| E1 | GY   | 2A | AX.89684909 | 7.13E+07 | 0.32 | -2.42    | 3.06 | 0.06 |
| E1 | GPM2 | 2A | AX.89523901 | 7.78E+08 | 0.22 | 837.88   | 4.11 | 0.07 |
| E1 | GPS  | 2A | AX.89526254 | 7.56E+08 | 0.26 | 1.38     | 3.59 | 0.06 |
| E1 | GPS  | 2A | AX.89614134 | 5.17E+08 | 0.33 | 1.20     | 3.19 | 0.06 |
| E1 | GPM2 | 2A | AX.89601983 | 7.11E+07 | 0.31 | -643.53  | 3.17 | 0.06 |
| E1 | GPS  | 2A | AX.89736567 | 5.07E+08 | 0.43 | 1.11     | 3.04 | 0.05 |
| E1 | GPM2 | 2A | AX.89492426 | 7.79E+08 | 0.20 | 905.56   | 4.51 | 0.08 |

|    |      |    |             |          |      |          |      |      |
|----|------|----|-------------|----------|------|----------|------|------|
| E1 | GPM2 | 2A | AX.89414865 | 7.55E+08 | 0.24 | 730.37   | 3.45 | 0.05 |
| E1 | GPM2 | 2A | AX.89658500 | 7.55E+08 | 0.29 | 669.50   | 3.30 | 0.05 |
| E1 | GPM2 | 2A | AX.89468617 | 7.80E+08 | 0.20 | 927.23   | 4.64 | 0.08 |
| E1 | GPS  | 2A | AX.89554029 | 7.78E+08 | 0.22 | 1.35     | 3.10 | 0.05 |
| E1 | GPS  | 2A | AX.89390240 | 7.49E+08 | 0.49 | 1.14     | 3.22 | 0.05 |
| E1 | GPS  | 2A | AX.89514082 | 7.50E+08 | 0.23 | 1.49     | 3.76 | 0.07 |
| E1 | GPM2 | 2A | AX.89705653 | 7.59E+08 | 0.20 | 852.43   | 4.06 | 0.07 |
| E1 | GPM2 | 2A | AX.89774365 | 7.53E+08 | 0.26 | 717.45   | 3.45 | 0.06 |
| E1 | GPM2 | 2A | AX.89431398 | 7.14E+07 | 0.43 | -647.67  | 3.60 | 0.07 |
| E1 | GPM2 | 2A | AX.89586700 | 7.56E+08 | 0.27 | 677.79   | 3.25 | 0.04 |
| E1 | GPS  | 2A | AX.89583447 | 7.47E+08 | 0.26 | 1.31     | 3.27 | 0.05 |
| E1 | GPS  | 2A | AX.89623304 | 5.16E+08 | 0.29 | 1.29     | 3.39 | 0.06 |
| E1 | GPS  | 2A | AX.89774365 | 7.53E+08 | 0.26 | 1.52     | 4.17 | 0.07 |
| E1 | GPM2 | 2A | AX.89626514 | 7.61E+08 | 0.16 | 934.46   | 4.08 | 0.07 |
| E1 | GPM2 | 2A | AX.89741076 | 7.86E+07 | 0.29 | 692.94   | 3.50 | 0.06 |
| E1 | GPS  | 2A | AX.89527911 | 7.56E+08 | 0.25 | 1.40     | 3.54 | 0.06 |
| E1 | GPS  | 2A | AX.89496259 | 7.78E+08 | 0.22 | 1.43     | 3.46 | 0.06 |
| E1 | GPS  | 2A | AX.89584156 | 5.10E+08 | 0.33 | 1.28     | 3.56 | 0.06 |
| E1 | GPM2 | 2A | AX.89361021 | 7.55E+08 | 0.18 | 790.35   | 3.24 | 0.06 |
| E1 | GPM2 | 2A | AX.89548461 | 7.16E+07 | 0.32 | -650.04  | 3.27 | 0.06 |
| E1 | GPS  | 2A | AX.89690325 | 5.13E+08 | 0.33 | 1.17     | 3.03 | 0.05 |
| E1 | GPS  | 2A | AX.89490527 | 7.78E+08 | 0.25 | 1.37     | 3.44 | 0.06 |
| E1 | GPM2 | 2A | AX.89572224 | 7.59E+08 | 0.20 | 852.43   | 4.06 | 0.07 |
| E1 | GPS  | 2A | AX.89718253 | 7.78E+08 | 0.22 | 1.35     | 3.10 | 0.05 |
| E1 | GPS  | 2A | AX.89657875 | 5.24E+08 | 0.33 | 1.25     | 3.39 | 0.06 |
| E1 | GPM2 | 2A | AX.89719826 | 7.61E+08 | 0.20 | 888.57   | 4.30 | 0.08 |
| E1 | GPM2 | 2A | AX.89552048 | 8.39E+07 | 0.21 | -709.87  | 3.05 | 0.05 |
| E1 | GPM2 | 2A | AX.89565512 | 7.79E+08 | 0.20 | 828.40   | 3.75 | 0.07 |
| E1 | GPM2 | 2A | AX.89637021 | 8.46E+07 | 0.23 | -710.38  | 3.17 | 0.05 |
| E1 | GPM2 | 2A | AX.89527911 | 7.56E+08 | 0.25 | 699.99   | 3.24 | 0.05 |
| E1 | GY   | 2A | AX.89508618 | 8.56E+07 | 0.07 | -4.82    | 3.53 | 0.07 |
| E1 | GPS  | 2A | AX.89586376 | 7.55E+08 | 0.27 | 1.49     | 4.19 | 0.07 |
| E1 | GPS  | 2A | AX.89451429 | 7.55E+08 | 0.24 | 1.47     | 3.77 | 0.07 |
| E1 | GPM2 | 2A | AX.89547326 | 6.04E+08 | 0.09 | -1132.54 | 3.76 | 0.07 |
| E1 | GPS  | 2A | AX.89413222 | 7.80E+08 | 0.21 | 1.39     | 3.20 | 0.06 |
| E1 | GPM2 | 2A | AX.89332386 | 7.59E+08 | 0.20 | 852.43   | 4.06 | 0.07 |
| E1 | GPS  | 2A | AX.89547112 | 5.09E+08 | 0.33 | 1.17     | 3.03 | 0.05 |
| E1 | GPS  | 2A | AX.89400174 | 7.79E+08 | 0.21 | 1.39     | 3.20 | 0.06 |
| E1 | GPS  | 2A | AX.89643216 | 7.55E+08 | 0.27 | 1.39     | 3.71 | 0.06 |
| E1 | GPM2 | 2A | AX.89434666 | 8.63E+07 | 0.23 | -714.47  | 3.24 | 0.06 |
| E1 | GPM2 | 2A | AX.89386633 | 7.12E+07 | 0.43 | -647.67  | 3.60 | 0.07 |
| E1 | GPS  | 2A | AX.89754385 | 5.17E+08 | 0.33 | 1.20     | 3.19 | 0.06 |
| E1 | GPS  | 2A | AX.89340155 | 7.56E+08 | 0.25 | 1.40     | 3.54 | 0.06 |
| E1 | GPM2 | 2A | AX.89614700 | 7.78E+08 | 0.22 | 837.88   | 4.11 | 0.07 |
| E1 | GPM2 | 2A | AX.89505306 | 7.16E+07 | 0.32 | -650.04  | 3.27 | 0.06 |
| E1 | GPM2 | 2A | AX.89551189 | 4.17E+08 | 0.17 | 774.99   | 3.07 | 0.05 |
| E1 | GPS  | 2A | AX.89545729 | 7.79E+08 | 0.22 | 1.53     | 3.88 | 0.07 |
| E1 | GPM2 | 2A | AX.89483238 | 7.59E+08 | 0.20 | 899.92   | 4.33 | 0.08 |
| E1 | GY   | 2A | AX.89745404 | 8.42E+07 | 0.06 | -6.32    | 5.04 | 0.10 |
| E1 | GY   | 2A | AX.89745404 | 8.42E+07 | 0.06 | -6.32    | 5.04 | 0.10 |

|    |      |    |             |          |      |         |      |      |
|----|------|----|-------------|----------|------|---------|------|------|
| E1 | GPM2 | 2A | AX.89372948 | 7.79E+08 | 0.20 | 789.02  | 3.50 | 0.06 |
| E1 | GPS  | 2A | AX.89620260 | 5.16E+08 | 0.33 | 1.20    | 3.19 | 0.06 |
| E1 | GPS  | 2A | AX.89586700 | 7.56E+08 | 0.27 | 1.39    | 3.71 | 0.06 |
| E1 | GPM2 | 2A | AX.89378004 | 8.39E+07 | 0.21 | -709.87 | 3.05 | 0.05 |
| E1 | GPM2 | 2A | AX.89451429 | 7.55E+08 | 0.24 | 717.69  | 3.31 | 0.06 |
| E1 | GPM2 | 2A | AX.89497975 | 7.26E+07 | 0.40 | -621.93 | 3.29 | 0.06 |
| E1 | GPS  | 2A | AX.89623031 | 5.11E+08 | 0.33 | 1.17    | 3.03 | 0.05 |
| E1 | GPS  | 2A | AX.89492426 | 7.79E+08 | 0.20 | 1.36    | 3.01 | 0.05 |
| E1 | GPS  | 2A | AX.89762500 | 5.10E+08 | 0.33 | 1.33    | 3.77 | 0.07 |
| E1 | GPS  | 2A | AX.89704050 | 7.69E+08 | 0.20 | -1.54   | 3.75 | 0.06 |
| E1 | GPM2 | 2A | AX.89472684 | 1.85E+08 | 0.25 | 819.20  | 4.30 | 0.08 |
| E1 | GPM2 | 2A | AX.89459185 | 7.60E+08 | 0.20 | 852.43  | 4.06 | 0.07 |
| E1 | GPS  | 2A | AX.89601425 | 7.56E+08 | 0.27 | 1.37    | 3.55 | 0.06 |
| E1 | GPM2 | 2A | AX.89531056 | 8.45E+07 | 0.23 | -710.38 | 3.17 | 0.05 |
| E1 | GPM2 | 2A | AX.89422120 | 7.59E+08 | 0.20 | 852.43  | 4.06 | 0.07 |
| E1 | GY   | 2A | AX.89543557 | 8.49E+07 | 0.23 | -2.96   | 3.60 | 0.06 |
| E1 | GPS  | 2A | AX.89711226 | 7.78E+08 | 0.22 | 1.43    | 3.46 | 0.06 |
| E1 | GPS  | 2A | AX.89554733 | 7.55E+08 | 0.27 | 1.43    | 3.93 | 0.07 |
| E1 | GPM2 | 2A | AX.89390161 | 7.14E+07 | 0.43 | -647.67 | 3.60 | 0.07 |
| E1 | GPS  | 2A | AX.89492206 | 7.47E+08 | 0.26 | 1.31    | 3.27 | 0.05 |
| E1 | GPS  | 2A | AX.89728983 | 7.55E+08 | 0.26 | 1.43    | 3.76 | 0.07 |
| E1 | GPS  | 2A | AX.89622104 | 7.78E+08 | 0.22 | 1.35    | 3.10 | 0.05 |
| E1 | GPM2 | 2A | AX.89375310 | 6.21E+07 | 0.25 | -668.63 | 3.03 | 0.05 |
| E1 | GPM2 | 2A | AX.89531704 | 7.78E+08 | 0.22 | 837.88  | 4.11 | 0.07 |
| E1 | GPM2 | 2A | AX.89412752 | 7.59E+08 | 0.20 | 852.43  | 4.06 | 0.07 |
| E1 | GPS  | 2A | AX.89538983 | 7.47E+08 | 0.26 | 1.31    | 3.27 | 0.05 |
| E1 | GPS  | 2A | AX.89311284 | 4.34E+08 | 0.34 | 1.18    | 3.12 | 0.05 |
| E1 | GPS  | 2A | AX.89737649 | 7.55E+08 | 0.24 | 1.47    | 3.77 | 0.07 |
| E1 | GPS  | 2A | AX.89560842 | 7.55E+08 | 0.30 | 1.31    | 3.56 | 0.06 |
| E1 | GPS  | 2A | AX.89603261 | 4.19E+08 | 0.37 | 1.25    | 3.53 | 0.06 |
| E1 | GPS  | 2A | AX.89592393 | 7.56E+08 | 0.27 | 1.39    | 3.71 | 0.06 |
| E1 | GPS  | 2A | AX.89557781 | 7.55E+08 | 0.26 | 1.43    | 3.76 | 0.07 |
| E1 | GPM2 | 2A | AX.89353071 | 8.49E+07 | 0.23 | -710.38 | 3.17 | 0.05 |
| E1 | GPS  | 2A | AX.89444190 | 7.80E+08 | 0.20 | 1.42    | 3.20 | 0.06 |
| E1 | GPS  | 2A | AX.89570234 | 7.55E+08 | 0.29 | 1.29    | 3.35 | 0.05 |
| E1 | GPS  | 2A | AX.89693872 | 7.80E+08 | 0.20 | 1.42    | 3.20 | 0.06 |
| E1 | GPM2 | 2A | AX.89424098 | 7.70E+08 | 0.19 | -766.41 | 3.18 | 0.05 |
| E1 | GPM2 | 2A | AX.89693872 | 7.80E+08 | 0.20 | 927.23  | 4.64 | 0.08 |
| E1 | GPS  | 2A | AX.89330185 | 7.80E+08 | 0.21 | 1.39    | 3.20 | 0.06 |
| E1 | GPS  | 2A | AX.89425443 | 7.50E+08 | 0.23 | 1.49    | 3.76 | 0.07 |
| E1 | GPS  | 2A | AX.89626597 | 7.78E+08 | 0.22 | 1.35    | 3.10 | 0.05 |
| E1 | GY   | 2A | AX.89452906 | 8.64E+07 | 0.23 | -3.05   | 3.80 | 0.07 |
| E1 | GY   | 2A | AX.89313648 | 3.12E+07 | 0.10 | 3.84    | 3.22 | 0.05 |
| E1 | GY   | 2A | AX.89654740 | 1.07E+08 | 0.13 | -3.29   | 3.04 | 0.04 |
| E1 | GPS  | 2A | AX.89622382 | 7.55E+08 | 0.20 | 1.37    | 3.08 | 0.05 |
| E1 | GPS  | 2A | AX.89335578 | 7.56E+08 | 0.27 | 1.37    | 3.55 | 0.06 |
| E1 | GPS  | 2A | AX.89577627 | 7.56E+08 | 0.27 | 1.37    | 3.55 | 0.06 |
| E1 | GPM2 | 2A | AX.89645117 | 7.13E+07 | 0.43 | -647.67 | 3.60 | 0.07 |
| E1 | GPS  | 2A | AX.89386972 | 5.24E+08 | 0.33 | 1.25    | 3.39 | 0.06 |
| E1 | GPS  | 2A | AX.89379833 | 7.55E+08 | 0.27 | 1.33    | 3.42 | 0.06 |



|    |      |    |             |          |      |          |      |      |
|----|------|----|-------------|----------|------|----------|------|------|
| E1 | GPS  | 2A | AX.89762459 | 7.55E+08 | 0.27 | 1.39     | 3.71 | 0.06 |
| E1 | GPS  | 2A | AX.89318322 | 5.10E+08 | 0.32 | 1.22     | 3.23 | 0.06 |
| E1 | GPM2 | 2A | AX.89646006 | 7.56E+08 | 0.26 | 695.68   | 3.27 | 0.04 |
| E1 | GPM2 | 2A | AX.89347674 | 7.56E+08 | 0.26 | 695.68   | 3.27 | 0.04 |
| E1 | GPM2 | 2A | AX.89766512 | 7.78E+08 | 0.22 | 837.88   | 4.11 | 0.07 |
| E1 | GPM2 | 2A | AX.89712759 | 8.50E+07 | 0.23 | -710.38  | 3.17 | 0.05 |
| E1 | GPM2 | 2A | AX.89778038 | 7.79E+08 | 0.21 | 948.49   | 4.97 | 0.09 |
| E1 | GY   | 2A | AX.89336730 | 7.40E+08 | 0.09 | -4.19    | 3.34 | 0.05 |
| E1 | GPS  | 2A | AX.89575538 | 7.55E+08 | 0.26 | 1.43     | 3.76 | 0.07 |
| E1 | GPM2 | 2A | AX.89609674 | 7.11E+07 | 0.32 | -650.04  | 3.27 | 0.06 |
| E1 | GPS  | 2A | AX.89644656 | 7.53E+08 | 0.29 | 1.32     | 3.50 | 0.06 |
| E1 | GPM2 | 2A | AX.89600036 | 7.70E+08 | 0.19 | -766.41  | 3.18 | 0.05 |
| E1 | GPS  | 2A | AX.89575335 | 5.15E+08 | 0.33 | 1.25     | 3.39 | 0.06 |
| E1 | GPM2 | 2A | AX.89638704 | 7.59E+08 | 0.21 | 795.83   | 3.71 | 0.07 |
| E1 | GPS  | 2A | AX.89496843 | 7.78E+08 | 0.29 | 1.39     | 3.85 | 0.06 |
| E1 | GPM2 | 2A | AX.89625773 | 7.80E+08 | 0.20 | 927.23   | 4.64 | 0.08 |
| E1 | GPM2 | 2A | AX.89677955 | 8.42E+07 | 0.20 | -777.92  | 3.42 | 0.06 |
| E1 | GPM2 | 2A | AX.89334194 | 6.03E+08 | 0.11 | -1200.04 | 4.64 | 0.09 |
| E1 | GPM2 | 2A | AX.89332055 | 7.56E+08 | 0.25 | 699.99   | 3.24 | 0.05 |
| E1 | GPM2 | 2A | AX.89557781 | 7.55E+08 | 0.26 | 695.37   | 3.27 | 0.06 |
| E1 | GPM2 | 2A | AX.89414077 | 8.46E+07 | 0.07 | -1294.07 | 3.57 | 0.07 |
| E1 | GY   | 2A | AX.89776905 | 8.42E+07 | 0.21 | -3.01    | 3.51 | 0.06 |
| E1 | GY   | 2A | AX.89690258 | 7.14E+07 | 0.32 | -2.42    | 3.06 | 0.06 |
| E1 | GPM2 | 2A | AX.89731936 | 7.59E+08 | 0.20 | 852.43   | 4.06 | 0.07 |
| E1 | GPM2 | 2A | AX.89617767 | 7.14E+07 | 0.33 | -687.76  | 3.63 | 0.07 |
| E1 | GPM2 | 2A | AX.89452906 | 8.64E+07 | 0.23 | -702.76  | 3.11 | 0.05 |
| E1 | GPM2 | 2A | AX.89740120 | 7.58E+08 | 0.23 | 735.98   | 3.41 | 0.06 |
| E1 | GPS  | 2A | AX.89317882 | 7.55E+08 | 0.24 | 1.47     | 3.77 | 0.07 |
| E1 | GY   | 2A | AX.89479590 | 7.14E+07 | 0.32 | -2.42    | 3.06 | 0.06 |
| E1 | GPM2 | 2A | AX.89592262 | 7.53E+08 | 0.41 | 695.26   | 4.02 | 0.06 |
| E1 | GPM2 | 2A | AX.89549965 | 6.04E+08 | 0.08 | -1224.91 | 3.97 | 0.07 |
| E1 | GPM2 | 2A | AX.89352998 | 7.11E+07 | 0.32 | -650.04  | 3.27 | 0.06 |
| E1 | GPM2 | 2A | AX.89717864 | 7.59E+08 | 0.21 | 841.02   | 4.02 | 0.07 |
| E1 | GPM2 | 2A | AX.89733650 | 7.55E+08 | 0.27 | 683.92   | 3.30 | 0.05 |
| E1 | GPM2 | 2A | AX.89489684 | 7.14E+07 | 0.32 | -654.74  | 3.29 | 0.06 |
| E1 | GPM2 | 2A | AX.89728983 | 7.55E+08 | 0.26 | 695.37   | 3.27 | 0.06 |
| E1 | GPM2 | 2A | AX.89513724 | 7.55E+08 | 0.24 | 717.69   | 3.31 | 0.06 |
| E1 | GY   | 2A | AX.89670276 | 7.51E+08 | 0.06 | -5.10    | 3.47 | 0.07 |
| E1 | GPM2 | 2A | AX.89440533 | 7.55E+08 | 0.27 | 680.27   | 3.21 | 0.05 |
| E1 | GY   | 2A | AX.89768688 | 8.39E+07 | 0.21 | -3.01    | 3.56 | 0.06 |
| E1 | GPM2 | 2A | AX.89461565 | 8.50E+07 | 0.23 | -710.38  | 3.17 | 0.05 |
| E1 | GPM2 | 2A | AX.89458867 | 7.59E+08 | 0.20 | 852.43   | 4.06 | 0.07 |
| E1 | GPM2 | 2A | AX.89665919 | 7.58E+08 | 0.17 | 922.20   | 4.15 | 0.07 |
| E1 | GPS  | 2A | AX.89753930 | 5.10E+08 | 0.33 | 1.19     | 3.13 | 0.05 |
| E1 | GPM2 | 2A | AX.89604900 | 6.36E+08 | 0.33 | -630.46  | 3.13 | 0.05 |
| E1 | GPM2 | 2A | AX.89514959 | 6.03E+08 | 0.09 | -1132.54 | 3.76 | 0.07 |
| E1 | GY   | 2A | AX.89721986 | 8.63E+07 | 0.07 | -4.82    | 3.53 | 0.07 |
| E1 | GPM2 | 2A | AX.89498193 | 7.78E+08 | 0.21 | 748.03   | 3.29 | 0.06 |
| E1 | GPM2 | 2A | AX.89492742 | 7.80E+08 | 0.20 | 927.23   | 4.64 | 0.08 |
| E1 | GPM2 | 2A | AX.89561705 | 7.80E+08 | 0.20 | 927.23   | 4.64 | 0.08 |

|    |      |    |             |          |      |          |      |      |
|----|------|----|-------------|----------|------|----------|------|------|
| E1 | GPM2 | 2A | AX.89490792 | 7.14E+07 | 0.43 | -647.67  | 3.60 | 0.07 |
| E1 | GY   | 2A | AX.89688659 | 8.53E+07 | 0.23 | -3.06    | 3.85 | 0.07 |
| E1 | GPM2 | 2A | AX.89636379 | 7.58E+08 | 0.24 | 720.64   | 3.33 | 0.06 |
| E1 | GY   | 2A | AX.89637021 | 8.46E+07 | 0.23 | -2.96    | 3.60 | 0.06 |
| E1 | GPM2 | 2A | AX.89502294 | 7.59E+08 | 0.21 | 737.14   | 3.21 | 0.06 |
| E1 | GY   | 2A | AX.89353712 | 8.63E+07 | 0.24 | -2.84    | 3.44 | 0.06 |
| E1 | GPM2 | 2A | AX.89434520 | 8.39E+07 | 0.21 | -709.87  | 3.05 | 0.05 |
| E1 | GPM2 | 2A | AX.89519604 | 7.14E+07 | 0.43 | -647.67  | 3.60 | 0.07 |
| E1 | GPM2 | 2A | AX.89554029 | 7.78E+08 | 0.22 | 837.88   | 4.11 | 0.07 |
| E1 | GPM2 | 2A | AX.89750010 | 7.56E+08 | 0.26 | 709.09   | 3.42 | 0.05 |
| E1 | GPM2 | 2A | AX.89625199 | 7.78E+08 | 0.21 | 748.03   | 3.29 | 0.06 |
| E1 | GPM2 | 2A | AX.89700518 | 7.11E+07 | 0.43 | -649.06  | 3.61 | 0.07 |
| E1 | GPM2 | 2A | AX.89503441 | 7.70E+08 | 0.19 | -766.41  | 3.18 | 0.05 |
| E1 | GPM2 | 2A | AX.89495417 | 8.39E+07 | 0.21 | -709.87  | 3.05 | 0.05 |
| E1 | GPM2 | 2A | AX.89330185 | 7.80E+08 | 0.21 | 948.49   | 4.97 | 0.09 |
| E1 | GPM2 | 2A | AX.89317882 | 7.55E+08 | 0.24 | 717.69   | 3.31 | 0.06 |
| E1 | GPM2 | 2A | AX.89569793 | 8.46E+07 | 0.07 | -1294.07 | 3.57 | 0.07 |
| E1 | GPM2 | 2A | AX.89468956 | 8.39E+07 | 0.21 | -709.87  | 3.05 | 0.05 |
| E1 | GPM2 | 2A | AX.89402644 | 8.45E+07 | 0.23 | -710.38  | 3.17 | 0.05 |
| E1 | GPM2 | 2A | AX.89750786 | 8.46E+07 | 0.23 | -710.38  | 3.17 | 0.05 |
| E1 | GPM2 | 2A | AX.89344976 | 7.56E+08 | 0.28 | 711.95   | 3.60 | 0.05 |
| E1 | GPM2 | 2A | AX.89463332 | 6.40E+07 | 0.32 | 673.85   | 3.48 | 0.06 |
| E1 | GPM2 | 2A | AX.89543557 | 8.49E+07 | 0.23 | -710.38  | 3.17 | 0.05 |
| E1 | GPM2 | 2A | AX.89462856 | 7.58E+08 | 0.23 | 735.98   | 3.41 | 0.06 |
| E1 | GPM2 | 2A | AX.89738181 | 7.58E+08 | 0.20 | 899.92   | 4.33 | 0.08 |
| E1 | GPM2 | 2A | AX.89699881 | 7.14E+07 | 0.32 | -650.04  | 3.27 | 0.06 |
| E1 | GPM2 | 2A | AX.89711226 | 7.78E+08 | 0.22 | 870.13   | 4.45 | 0.08 |
| E1 | GPM2 | 2A | AX.89542005 | 6.93E+08 | 0.19 | -831.67  | 3.65 | 0.06 |
| E1 | GY   | 2A | AX.89765361 | 7.53E+08 | 0.10 | 4.12     | 3.63 | 0.06 |
| E1 | GY   | 2A | AX.89765361 | 7.53E+08 | 0.10 | 4.12     | 3.63 | 0.06 |
| E1 | GPM2 | 2A | AX.89636460 | 7.55E+08 | 0.26 | 695.37   | 3.27 | 0.06 |
| E1 | GPM2 | 2A | AX.89381894 | 7.78E+08 | 0.21 | 748.03   | 3.29 | 0.06 |
| E1 | GPM2 | 2A | AX.89463340 | 8.63E+07 | 0.23 | -714.47  | 3.24 | 0.06 |
| E1 | GPM2 | 2A | AX.89463683 | 7.10E+07 | 0.32 | -650.04  | 3.27 | 0.06 |
| E1 | GPM2 | 2A | AX.89479590 | 7.14E+07 | 0.32 | -650.04  | 3.27 | 0.06 |
| E1 | GY   | 2A | AX.89728140 | 6.78E+08 | 0.49 | 2.35     | 3.26 | 0.05 |
| E1 | GPM2 | 2A | AX.89424726 | 8.50E+07 | 0.23 | -710.38  | 3.17 | 0.05 |
| E1 | GY   | 2A | AX.89542005 | 6.93E+08 | 0.19 | -3.86    | 5.03 | 0.08 |
| E1 | GY   | 2A | AX.89461565 | 8.50E+07 | 0.23 | -2.96    | 3.60 | 0.06 |
| E1 | GY   | 2A | AX.89324170 | 7.69E+08 | 0.06 | -4.93    | 3.07 | 0.05 |
| E1 | GY   | 2A | AX.89750786 | 8.46E+07 | 0.23 | -2.96    | 3.60 | 0.06 |
| E1 | GY   | 2A | AX.89706225 | 8.42E+07 | 0.07 | -5.54    | 4.26 | 0.08 |
| E1 | GPM2 | 2A | AX.89453425 | 6.15E+07 | 0.21 | 812.89   | 3.79 | 0.07 |
| E1 | GPM2 | 2A | AX.89568492 | 7.58E+08 | 0.19 | 916.62   | 4.40 | 0.08 |
| E1 | GPM2 | 2A | AX.89317561 | 7.14E+07 | 0.44 | -595.68  | 3.13 | 0.06 |
| E1 | GPM2 | 2A | AX.89549770 | 7.59E+08 | 0.20 | 852.43   | 4.06 | 0.07 |
| E1 | GPM2 | 2A | AX.89460601 | 7.61E+08 | 0.23 | 717.31   | 3.22 | 0.06 |
| E1 | GPM2 | 2A | AX.89455016 | 7.14E+07 | 0.43 | -647.67  | 3.60 | 0.07 |
| E1 | GPM2 | 2A | AX.89402750 | 7.79E+08 | 0.20 | 905.56   | 4.51 | 0.08 |
| E1 | GY   | 2A | AX.89495417 | 8.39E+07 | 0.21 | -3.01    | 3.56 | 0.06 |

|    |      |    |             |          |      |          |      |      |
|----|------|----|-------------|----------|------|----------|------|------|
| E1 | GPM2 | 2A | AX.89457808 | 7.69E+08 | 0.20 | -896.39  | 4.43 | 0.07 |
| E1 | GPM2 | 2A | AX.89539167 | 7.55E+08 | 0.27 | 677.79   | 3.25 | 0.04 |
| E1 | GPM2 | 2A | AX.89575155 | 7.58E+08 | 0.23 | 735.98   | 3.41 | 0.06 |
| E1 | GPM2 | 2A | AX.89601425 | 7.56E+08 | 0.27 | 680.27   | 3.21 | 0.05 |
| E1 | GPM2 | 2A | AX.89580653 | 7.55E+08 | 0.24 | 780.68   | 3.82 | 0.07 |
| E1 | GPM2 | 2A | AX.89573905 | 7.55E+08 | 0.24 | 780.68   | 3.82 | 0.07 |
| E1 | GPM2 | 2A | AX.89340155 | 7.56E+08 | 0.25 | 699.99   | 3.24 | 0.05 |
| E1 | GPM2 | 2A | AX.89745404 | 8.42E+07 | 0.06 | -1455.75 | 4.12 | 0.08 |
| E1 | GPM2 | 2A | AX.89348730 | 8.50E+07 | 0.23 | -710.38  | 3.17 | 0.05 |
| E1 | GPM2 | 2A | AX.89468552 | 7.79E+08 | 0.20 | 905.56   | 4.51 | 0.08 |
| E1 | GPM2 | 2A | AX.86169701 | 7.76E+08 | 0.10 | -958.25  | 3.04 | 0.05 |
| E1 | GPM2 | 2A | AX.89552978 | 7.61E+08 | 0.19 | 850.14   | 3.80 | 0.07 |
| E1 | GPM2 | 2A | AX.89389069 | 7.58E+08 | 0.23 | 735.98   | 3.41 | 0.06 |
| E1 | GPM2 | 2A | AX.89313163 | 6.03E+08 | 0.09 | -1132.54 | 3.76 | 0.07 |
| E1 | GPM2 | 2A | AX.89442869 | 7.55E+08 | 0.24 | 717.69   | 3.31 | 0.06 |
| E1 | GPM2 | 2A | AX.89702562 | 7.10E+07 | 0.32 | -650.04  | 3.27 | 0.06 |
| E1 | GPM2 | 2A | AX.89711069 | 7.14E+07 | 0.33 | -670.62  | 3.47 | 0.07 |
| E1 | GY   | 2A | AX.89677955 | 8.42E+07 | 0.20 | -3.03    | 3.45 | 0.06 |
| E1 | GPM2 | 2A | AX.89331067 | 7.76E+08 | 0.09 | -1055.49 | 3.20 | 0.05 |
| E1 | GPM2 | 2A | AX.89406193 | 7.59E+08 | 0.20 | 852.43   | 4.06 | 0.07 |
| E1 | GPM2 | 2A | AX.89445758 | 7.79E+08 | 0.20 | 905.56   | 4.51 | 0.08 |
| E1 | GPM2 | 2A | AX.89372440 | 7.10E+07 | 0.43 | -647.67  | 3.60 | 0.07 |
| E1 | GPM2 | 2A | AX.89602806 | 8.46E+07 | 0.23 | -710.38  | 3.17 | 0.05 |
| E1 | GPM2 | 2A | AX.89755851 | 7.60E+08 | 0.17 | 861.57   | 3.68 | 0.06 |
| E1 | GPM2 | 2A | AX.89493190 | 7.78E+08 | 0.31 | 633.90   | 3.07 | 0.05 |
| E1 | GPM2 | 2A | AX.89694063 | 5.84E+07 | 0.30 | 748.76   | 4.06 | 0.07 |
| E1 | GPM2 | 2A | AX.89631438 | 7.59E+08 | 0.20 | 852.43   | 4.06 | 0.07 |
| E1 | GPM2 | 2A | AX.89354221 | 7.56E+08 | 0.25 | 699.99   | 3.24 | 0.05 |
| E1 | GPM2 | 2A | AX.89431192 | 7.14E+07 | 0.32 | -650.04  | 3.27 | 0.06 |
| E1 | GPM2 | 2A | AX.89385952 | 7.15E+07 | 0.32 | -650.04  | 3.27 | 0.06 |
| E1 | GPM2 | 2A | AX.89621355 | 7.59E+08 | 0.20 | 852.43   | 4.06 | 0.07 |
| E1 | GPM2 | 2A | AX.89549784 | 8.53E+07 | 0.22 | -698.62  | 3.05 | 0.05 |
| E1 | GPM2 | 2A | AX.89517936 | 7.10E+07 | 0.32 | -650.04  | 3.27 | 0.06 |
| E1 | GPS  | 2A | AX.89451660 | 5.09E+08 | 0.32 | 1.22     | 3.23 | 0.06 |
| E1 | GPS  | 2A | AX.89756875 | 4.67E+08 | 0.33 | 1.26     | 3.46 | 0.06 |
| E1 | GPM2 | 2A | AX.89526331 | 7.78E+08 | 0.22 | 837.88   | 4.11 | 0.07 |
| E1 | GPM2 | 2A | AX.89704050 | 7.69E+08 | 0.20 | -896.39  | 4.43 | 0.07 |
| E1 | GPM2 | 2A | AX.89395191 | 6.93E+08 | 0.17 | -794.91  | 3.15 | 0.05 |
| E1 | GY   | 2A | AX.89536127 | 7.69E+08 | 0.06 | -4.93    | 3.07 | 0.05 |
| E1 | GPS  | 2A | AX.89352382 | 7.47E+08 | 0.20 | 1.54     | 3.64 | 0.06 |
| E1 | GPM2 | 2A | AX.89425114 | 8.46E+07 | 0.23 | -710.38  | 3.17 | 0.05 |
| E1 | GPM2 | 2A | AX.89583054 | 7.80E+08 | 0.21 | 948.49   | 4.97 | 0.09 |
| E1 | GPM2 | 2A | AX.89770581 | 6.15E+07 | 0.20 | 826.82   | 3.79 | 0.07 |
| E1 | GPM2 | 2A | AX.89397285 | 7.80E+08 | 0.20 | 927.23   | 4.64 | 0.08 |
| E1 | GPM2 | 2A | AX.89569105 | 7.76E+08 | 0.08 | -1056.70 | 3.08 | 0.05 |
| E1 | GPS  | 2A | AX.89732786 | 7.79E+08 | 0.21 | 1.39     | 3.20 | 0.06 |
| E1 | GPS  | 2A | AX.89655029 | 7.55E+08 | 0.35 | 1.27     | 3.59 | 0.06 |
| E1 | GPS  | 2A | AX.89621466 | 5.11E+08 | 0.33 | 1.17     | 3.03 | 0.05 |
| E1 | GPM2 | 2A | AX.89531707 | 7.58E+08 | 0.22 | 732.77   | 3.30 | 0.06 |
| E1 | GPM2 | 2A | AX.89610686 | 8.42E+07 | 0.06 | -1385.30 | 3.78 | 0.07 |

|    |      |    |             |          |      |          |      |      |
|----|------|----|-------------|----------|------|----------|------|------|
| E1 | GPS  | 2A | AX.89757261 | 7.69E+08 | 0.21 | -1.47    | 3.50 | 0.06 |
| E1 | GPS  | 2A | AX.89636229 | 5.08E+08 | 0.32 | 1.22     | 3.23 | 0.06 |
| E1 | GPM2 | 2A | AX.89613544 | 7.78E+08 | 0.22 | 837.88   | 4.11 | 0.07 |
| E1 | GPM2 | 2A | AX.89491406 | 7.60E+08 | 0.20 | 852.43   | 4.06 | 0.07 |
| E1 | GPS  | 2A | AX.89733650 | 7.55E+08 | 0.27 | 1.39     | 3.71 | 0.06 |
| E1 | GPS  | 2A | AX.89374034 | 7.55E+08 | 0.26 | 1.39     | 3.62 | 0.06 |
| E1 | GY   | 2A | AX.89777060 | 8.39E+07 | 0.21 | -3.01    | 3.56 | 0.06 |
| E1 | GPM2 | 2A | AX.89684909 | 7.13E+07 | 0.32 | -650.04  | 3.27 | 0.06 |
| E1 | GPM2 | 2A | AX.89401600 | 7.13E+07 | 0.43 | -647.67  | 3.60 | 0.07 |
| E1 | GPS  | 2A | AX.89516661 | 7.56E+08 | 0.27 | 1.39     | 3.71 | 0.06 |
| E1 | GPM2 | 2A | AX.89449290 | 6.15E+07 | 0.22 | 803.47   | 3.82 | 0.07 |
| E1 | GPM2 | 2A | AX.89491754 | 7.58E+08 | 0.20 | 899.92   | 4.33 | 0.08 |
| E1 | GPS  | 2A | AX.89461692 | 5.09E+08 | 0.33 | 1.26     | 3.47 | 0.06 |
| E1 | GPS  | 2A | AX.89413101 | 5.23E+08 | 0.33 | 1.16     | 3.01 | 0.05 |
| E1 | GPM2 | 2A | AX.89473269 | 6.52E+08 | 0.05 | -1414.64 | 3.43 | 0.06 |
| E1 | GPS  | 2A | AX.89614230 | 7.55E+08 | 0.21 | 1.53     | 3.75 | 0.07 |
| E1 | GPM2 | 2A | AX.89534141 | 7.55E+08 | 0.27 | 664.85   | 3.12 | 0.05 |
| E1 | GPS  | 2A | AX.89440533 | 7.55E+08 | 0.27 | 1.37     | 3.55 | 0.06 |
| E1 | GPM2 | 2A | AX.89592393 | 7.56E+08 | 0.27 | 677.79   | 3.25 | 0.04 |
| E1 | GPM2 | 2A | AX.89657141 | 7.60E+08 | 0.20 | 824.25   | 3.83 | 0.07 |
| E1 | GPM2 | 2A | AX.89510338 | 7.76E+08 | 0.08 | -1056.70 | 3.08 | 0.05 |
| E1 | GPM2 | 2A | AX.89429525 | 8.42E+07 | 0.07 | -1294.07 | 3.57 | 0.07 |
| E1 | GPS  | 2A | AX.89413417 | 7.55E+08 | 0.26 | 1.43     | 3.76 | 0.07 |
| E1 | GPM2 | 2A | AX.89408757 | 7.11E+07 | 0.43 | -647.67  | 3.60 | 0.07 |
| E1 | GPM2 | 2A | AX.89526254 | 7.56E+08 | 0.26 | 665.29   | 3.06 | 0.05 |
| E1 | GPS  | 2A | AX.89700904 | 7.53E+08 | 0.20 | 1.56     | 3.77 | 0.07 |
| E1 | GPM2 | 2A | AX.89487768 | 7.56E+08 | 0.24 | 685.15   | 3.09 | 0.05 |
| E1 | GPM2 | 2A | AX.89627848 | 7.78E+08 | 0.25 | 889.26   | 4.97 | 0.09 |
| E1 | GPS  | 2A | AX.89503042 | 5.24E+08 | 0.33 | 1.20     | 3.19 | 0.06 |
| E1 | GPM2 | 2A | AX.89757261 | 7.69E+08 | 0.21 | -905.63  | 4.58 | 0.08 |
| E1 | GPM2 | 2A | AX.89369914 | 7.59E+08 | 0.20 | 852.43   | 4.06 | 0.07 |
| E1 | GPS  | 2A | AX.89452594 | 7.55E+08 | 0.26 | 1.39     | 3.62 | 0.06 |
| E1 | GPM2 | 2A | AX.89444190 | 7.80E+08 | 0.20 | 927.23   | 4.64 | 0.08 |
| E1 | GPM2 | 2A | AX.89336730 | 7.40E+08 | 0.09 | -1016.82 | 3.00 | 0.05 |
| E1 | GPM2 | 2A | AX.89768688 | 8.39E+07 | 0.21 | -709.87  | 3.05 | 0.05 |
| E1 | GPM2 | 2A | AX.89379457 | 7.60E+08 | 0.20 | 888.57   | 4.30 | 0.08 |
| E1 | GPS  | 2A | AX.89464739 | 7.47E+08 | 0.26 | 1.31     | 3.27 | 0.05 |
| E1 | GPS  | 2A | AX.89489555 | 7.53E+08 | 0.21 | 1.57     | 3.92 | 0.07 |
| E1 | GPM2 | 2A | AX.89736839 | 6.68E+07 | 0.17 | 828.14   | 3.44 | 0.06 |
| E1 | GPM2 | 2A | AX.89622104 | 7.78E+08 | 0.22 | 837.88   | 4.11 | 0.07 |
| E1 | GPM2 | 2A | AX.89705624 | 7.59E+08 | 0.17 | 902.79   | 3.92 | 0.07 |
| E1 | GPM2 | 2A | AX.89552229 | 7.60E+08 | 0.20 | 852.43   | 4.06 | 0.07 |
| E1 | GPM2 | 2A | AX.89631377 | 7.79E+08 | 0.20 | 860.25   | 4.06 | 0.07 |
| E1 | GPM2 | 2A | AX.89451631 | 6.23E+07 | 0.23 | 754.65   | 3.52 | 0.05 |
| E1 | GPM2 | 2A | AX.89371398 | 7.10E+07 | 0.43 | -647.67  | 3.60 | 0.07 |
| E1 | GPM2 | 2A | AX.89475215 | 6.04E+08 | 0.09 | -1132.54 | 3.76 | 0.07 |
| E1 | GPM2 | 2A | AX.89466871 | 7.60E+08 | 0.20 | 888.57   | 4.30 | 0.08 |
| E1 | GPM2 | 2A | AX.89320685 | 7.61E+08 | 0.20 | 888.57   | 4.30 | 0.08 |
| E1 | GPM2 | 2A | AX.89334859 | 7.61E+08 | 0.20 | 888.57   | 4.30 | 0.08 |
| E1 | GPM2 | 2A | AX.89553523 | 8.63E+07 | 0.23 | -714.47  | 3.24 | 0.06 |

|    |      |    |             |          |      |         |      |      |
|----|------|----|-------------|----------|------|---------|------|------|
| E1 | GPS  | 2A | AX.89693999 | 7.78E+08 | 0.22 | 1.35    | 3.10 | 0.05 |
| E1 | GPM2 | 2A | AX.89382126 | 7.10E+07 | 0.46 | -668.20 | 3.84 | 0.07 |
| E1 | GY   | 2A | AX.89628287 | 8.42E+07 | 0.06 | -6.32   | 5.04 | 0.10 |
| E1 | GPM2 | 2A | AX.89554733 | 7.55E+08 | 0.27 | 653.08  | 3.05 | 0.05 |
| E1 | GPM2 | 2A | AX.89643216 | 7.55E+08 | 0.27 | 683.92  | 3.30 | 0.05 |
| E1 | GPS  | 2A | AX.89509268 | 5.16E+08 | 0.33 | 1.20    | 3.19 | 0.06 |
| E1 | TKW  | 2A | AX.89345671 | 4.28E+07 | 0.12 | -1.50   | 4.01 | 0.07 |
| E1 | GPM2 | 2A | AX.89626597 | 7.78E+08 | 0.22 | 837.88  | 4.11 | 0.07 |
| E1 | TKW  | 2A | AX.89581383 | 3.19E+07 | 0.27 | -0.98   | 3.28 | 0.06 |
| E1 | GPM2 | 2A | AX.89432407 | 8.56E+07 | 0.23 | -714.47 | 3.24 | 0.06 |
| E1 | TKW  | 2A | AX.89562993 | 7.55E+08 | 0.26 | -1.06   | 3.68 | 0.06 |
| E1 | GPM2 | 2A | AX.89462038 | 1.93E+08 | 0.48 | 671.35  | 3.89 | 0.07 |
| E1 | TKW  | 2A | AX.89359914 | 7.61E+08 | 0.26 | -1.12   | 4.01 | 0.07 |
| E1 | GPM2 | 2A | AX.89693999 | 7.78E+08 | 0.22 | 837.88  | 4.11 | 0.07 |
| E1 | GPM2 | 2A | AX.89742627 | 7.54E+08 | 0.21 | 838.62  | 4.00 | 0.07 |
| E1 | GPM2 | 2A | AX.89502868 | 7.11E+07 | 0.32 | -654.74 | 3.29 | 0.06 |
| E1 | GPM2 | 2A | AX.89503320 | 7.78E+08 | 0.22 | 837.88  | 4.11 | 0.07 |
| E1 | TKW  | 2A | AX.89568492 | 7.58E+08 | 0.19 | -1.06   | 3.02 | 0.05 |
| E1 | GPM2 | 2A | AX.89777060 | 8.39E+07 | 0.21 | -709.87 | 3.05 | 0.05 |
| E1 | TKW  | 2A | AX.89365566 | 7.55E+08 | 0.26 | -1.06   | 3.68 | 0.06 |
| E1 | GPM2 | 2A | AX.89322846 | 7.80E+08 | 0.20 | 927.23  | 4.64 | 0.08 |
| E1 | GPM2 | 2A | AX.89678558 | 7.58E+08 | 0.23 | 735.98  | 3.41 | 0.06 |
| E1 | GPS  | 2A | AX.89552978 | 7.61E+08 | 0.19 | 1.51    | 3.41 | 0.06 |
| E1 | GPM2 | 2A | AX.89614230 | 7.55E+08 | 0.21 | 880.45  | 4.36 | 0.08 |
| E1 | GPS  | 2A | AX.89624783 | 7.47E+08 | 0.21 | 1.36    | 3.11 | 0.05 |
| E1 | TKW  | 2A | AX.89573905 | 7.55E+08 | 0.24 | -1.10   | 3.69 | 0.06 |
| E1 | TKW  | 2A | AX.89689821 | 7.55E+08 | 0.24 | -1.03   | 3.36 | 0.05 |
| E1 | GPM2 | 2A | AX.89617723 | 8.41E+07 | 0.21 | -709.87 | 3.05 | 0.05 |
| E1 | TKW  | 2A | AX.89575538 | 7.55E+08 | 0.26 | -1.07   | 3.67 | 0.06 |
| E1 | GPM2 | 2A | AX.89697473 | 7.78E+08 | 0.20 | 778.95  | 3.42 | 0.06 |
| E1 | GPM2 | 2A | AX.89551770 | 8.39E+07 | 0.21 | -709.87 | 3.05 | 0.05 |
| E1 | GPM2 | 2A | AX.89710998 | 7.59E+08 | 0.20 | 852.43  | 4.06 | 0.07 |
| E1 | TKW  | 2A | AX.89586614 | 4.32E+07 | 0.12 | -1.46   | 3.82 | 0.06 |
| E1 | GPM2 | 2A | AX.89637508 | 7.55E+08 | 0.27 | 686.53  | 3.26 | 0.05 |
| E1 | TKW  | 2A | AX.89442869 | 7.55E+08 | 0.24 | -0.99   | 3.10 | 0.05 |
| E1 | GPM2 | 2A | AX.89358011 | 7.13E+07 | 0.43 | -649.06 | 3.61 | 0.07 |
| E1 | GY   | 2A | AX.89776905 | 8.42E+07 | 0.21 | -3.01   | 3.51 | 0.06 |
| E1 | GPM2 | 2A | AX.89335578 | 7.56E+08 | 0.27 | 680.27  | 3.21 | 0.04 |
| E1 | TKW  | 2A | AX.89554733 | 7.55E+08 | 0.27 | -0.98   | 3.32 | 0.06 |
| E1 | TKW  | 2A | AX.89348439 | 7.57E+08 | 0.39 | 0.90    | 3.31 | 0.06 |
| E1 | GPM2 | 2A | AX.89343951 | 7.61E+08 | 0.20 | 888.57  | 4.30 | 0.08 |
| E1 | GPM2 | 2A | AX.89622756 | 7.79E+08 | 0.20 | 905.56  | 4.51 | 0.08 |
| E1 | TKW  | 2A | AX.89577627 | 7.56E+08 | 0.27 | -0.99   | 3.30 | 0.06 |
| E1 | GPM2 | 2A | AX.89700904 | 7.53E+08 | 0.20 | 827.83  | 3.80 | 0.07 |
| E1 | GPM2 | 2A | AX.89426786 | 7.79E+08 | 0.21 | 948.49  | 4.97 | 0.09 |
| E1 | GPM2 | 2A | AX.89310582 | 7.59E+08 | 0.20 | 852.43  | 4.06 | 0.07 |
| E1 | GPM2 | 2A | AX.89668676 | 7.16E+07 | 0.43 | -647.67 | 3.60 | 0.07 |
| E1 | TKW  | 2A | AX.89570234 | 7.55E+08 | 0.29 | -0.96   | 3.30 | 0.06 |
| E1 | GPM2 | 2A | AX.89564635 | 7.16E+07 | 0.43 | -647.67 | 3.60 | 0.07 |
| E1 | GY   | 2A | AX.89716272 | 7.14E+07 | 0.32 | -2.42   | 3.06 | 0.06 |

|    |      |    |             |          |      |          |      |      |
|----|------|----|-------------|----------|------|----------|------|------|
| E1 | GPM2 | 2A | AX.89488613 | 8.56E+07 | 0.07 | -1294.07 | 3.57 | 0.07 |
| E1 | GPM2 | 2A | AX.89436162 | 7.59E+08 | 0.21 | 747.24   | 3.33 | 0.06 |
| E1 | GPM2 | 2A | AX.89417730 | 7.14E+07 | 0.32 | -650.04  | 3.27 | 0.06 |
| E1 | TKW  | 2A | AX.89601729 | 3.19E+07 | 0.28 | -0.97    | 3.26 | 0.06 |
| E1 | GPM2 | 2A | AX.89545729 | 7.79E+08 | 0.22 | 939.60   | 5.03 | 0.09 |
| E1 | GPM2 | 2A | AX.89718253 | 7.78E+08 | 0.22 | 837.88   | 4.11 | 0.07 |
| E1 | TKW  | 2A | AX.89457700 | 7.58E+08 | 0.23 | -1.02    | 3.20 | 0.05 |
| E1 | GPM2 | 2A | AX.89682243 | 7.43E+08 | 0.32 | 662.57   | 3.36 | 0.05 |
| E1 | GPM2 | 2A | AX.89721796 | 6.03E+08 | 0.09 | -1132.54 | 3.76 | 0.07 |
| E1 | TKW  | 2A | AX.89586376 | 7.55E+08 | 0.27 | -1.02    | 3.48 | 0.06 |
| E1 | GPM2 | 2A | AX.89747863 | 7.55E+08 | 0.27 | 683.92   | 3.30 | 0.05 |
| E1 | GPM2 | 2A | AX.89716272 | 7.14E+07 | 0.32 | -650.04  | 3.27 | 0.06 |
| E1 | GPM2 | 2A | AX.89311260 | 7.14E+07 | 0.43 | -647.67  | 3.60 | 0.07 |
| E1 | TKW  | 2A | AX.89374034 | 7.55E+08 | 0.26 | -1.06    | 3.68 | 0.06 |
| E1 | GPM2 | 2A | AX.89654143 | 7.58E+08 | 0.22 | 808.93   | 3.92 | 0.07 |
| E1 | GPM2 | 2A | AX.89400174 | 7.79E+08 | 0.21 | 948.49   | 4.97 | 0.09 |
| E1 | GPM2 | 2A | AX.89424046 | 7.60E+08 | 0.20 | 888.57   | 4.30 | 0.08 |
| E1 | GY   | 2A | AX.89688659 | 8.53E+07 | 0.23 | -3.06    | 3.85 | 0.07 |
| E1 | GPM2 | 2A | AX.89632373 | 8.45E+07 | 0.23 | -710.38  | 3.17 | 0.05 |
| E1 | GPM2 | 2A | AX.89702439 | 7.61E+08 | 0.20 | 888.57   | 4.30 | 0.08 |
| E1 | GPM2 | 2A | AX.89534013 | 6.04E+08 | 0.09 | -1034.72 | 3.09 | 0.06 |
| E1 | GPM2 | 2A | AX.89335443 | 6.04E+08 | 0.09 | -1132.54 | 3.76 | 0.07 |
| E1 | GPM2 | 2A | AX.89420289 | 7.10E+07 | 0.32 | -650.04  | 3.27 | 0.06 |
| E1 | GPM2 | 2A | AX.89706460 | 7.55E+08 | 0.21 | 880.45   | 4.36 | 0.08 |
| E1 | GPM2 | 2A | AX.89425537 | 8.42E+07 | 0.21 | -709.87  | 3.05 | 0.05 |
| E1 | GY   | 2A | AX.89495219 | 8.50E+07 | 0.23 | -2.96    | 3.60 | 0.06 |
| E1 | GPM2 | 2A | AX.89527155 | 7.78E+08 | 0.22 | 837.88   | 4.11 | 0.07 |
| E1 | GPM2 | 2A | AX.89591770 | 7.56E+08 | 0.24 | 681.17   | 3.06 | 0.04 |
| E1 | GPM2 | 2A | AX.89742073 | 7.76E+08 | 0.08 | -1056.70 | 3.08 | 0.05 |
| E1 | GPM2 | 2A | AX.89775602 | 7.10E+07 | 0.32 | -650.04  | 3.27 | 0.06 |
| E1 | TKW  | 2A | AX.89737871 | 7.55E+08 | 0.24 | -0.99    | 3.10 | 0.05 |
| E1 | GPM2 | 2A | AX.89577287 | 6.03E+08 | 0.09 | -1095.03 | 3.41 | 0.05 |
| E1 | GPM2 | 2A | AX.89685749 | 7.59E+08 | 0.20 | 852.43   | 4.06 | 0.07 |
| E1 | TKW  | 2A | AX.89584181 | 4.28E+07 | 0.13 | -1.41    | 3.68 | 0.06 |
| E1 | GPM2 | 2A | AX.89688659 | 8.53E+07 | 0.23 | -714.47  | 3.24 | 0.06 |
| E1 | GPM2 | 2A | AX.89442084 | 7.16E+07 | 0.32 | -650.04  | 3.27 | 0.06 |
| E1 | GPM2 | 2A | AX.89489555 | 7.53E+08 | 0.21 | 814.97   | 3.81 | 0.07 |
| E1 | GPM2 | 2A | AX.89608550 | 8.46E+07 | 0.23 | -710.38  | 3.17 | 0.05 |
| E1 | TKW  | 2A | AX.89452594 | 7.55E+08 | 0.26 | -1.06    | 3.68 | 0.06 |
| E1 | GPM2 | 2A | AX.89737649 | 7.55E+08 | 0.24 | 717.69   | 3.31 | 0.06 |
| E1 | GY   | 2A | AX.89542005 | 6.93E+08 | 0.19 | -3.86    | 5.03 | 0.08 |
| E1 | TKW  | 2A | AX.89359686 | 7.17E+08 | 0.47 | 0.88     | 3.35 | 0.06 |
| E1 | TKW  | 2A | AX.89771272 | 7.55E+08 | 0.24 | -0.99    | 3.10 | 0.05 |
| E1 | TKW  | 2A | AX.89530198 | 3.18E+07 | 0.28 | -0.93    | 3.04 | 0.05 |
| E1 | TKW  | 2A | AX.89408055 | 7.55E+08 | 0.26 | -1.06    | 3.68 | 0.06 |
| E1 | TKW  | 2A | AX.89733650 | 7.55E+08 | 0.27 | -0.98    | 3.28 | 0.06 |
| E1 | TKW  | 2A | AX.89317882 | 7.55E+08 | 0.24 | -0.99    | 3.10 | 0.05 |
| E1 | TKW  | 2A | AX.89630473 | 7.58E+08 | 0.12 | 1.41     | 3.50 | 0.06 |
| E1 | TKW  | 2A | AX.89389069 | 7.58E+08 | 0.23 | -1.02    | 3.20 | 0.05 |
| E1 | TKW  | 2A | AX.89530584 | 7.56E+08 | 0.26 | -1.01    | 3.35 | 0.06 |

|    |      |    |             |          |      |          |      |      |
|----|------|----|-------------|----------|------|----------|------|------|
| E1 | TKW  | 2A | AX.89539167 | 7.55E+08 | 0.27 | -1.09    | 3.95 | 0.07 |
| E1 | TKW  | 2A | AX.89675694 | 3.18E+07 | 0.28 | -1.01    | 3.56 | 0.06 |
| E1 | TKW  | 2A | AX.89627848 | 7.78E+08 | 0.25 | -0.99    | 3.21 | 0.05 |
| E1 | TKW  | 2A | AX.89580653 | 7.55E+08 | 0.24 | -1.10    | 3.69 | 0.06 |
| E1 | TKW  | 2A | AX.89655029 | 7.55E+08 | 0.35 | -1.03    | 4.05 | 0.07 |
| E1 | TKW  | 2A | AX.89752134 | 7.55E+08 | 0.26 | -1.07    | 3.67 | 0.06 |
| E1 | TKW  | 2A | AX.89530131 | 7.55E+08 | 0.27 | -1.11    | 4.04 | 0.07 |
| E1 | TKW  | 2A | AX.89553707 | 7.60E+08 | 0.22 | -1.03    | 3.21 | 0.05 |
| E1 | TKW  | 2A | AX.89658500 | 7.55E+08 | 0.29 | -1.05    | 3.87 | 0.07 |
| E1 | TKW  | 2A | AX.89375933 | 7.55E+08 | 0.26 | -1.06    | 3.68 | 0.06 |
| E1 | TKW  | 2A | AX.89643216 | 7.55E+08 | 0.27 | -0.98    | 3.28 | 0.06 |
| E1 | TKW  | 2A | AX.89344976 | 7.56E+08 | 0.28 | -1.08    | 3.97 | 0.07 |
| E1 | TKW  | 2A | AX.89377018 | 3.19E+07 | 0.27 | -0.98    | 3.28 | 0.06 |
| E1 | GY   | 2A | AX.89745955 | 8.46E+07 | 0.23 | -2.96    | 3.60 | 0.06 |
| E1 | GPM2 | 2A | AX.89694875 | 7.11E+07 | 0.32 | -650.04  | 3.27 | 0.06 |
| E1 | GPM2 | 2A | AX.89586376 | 7.55E+08 | 0.27 | 664.85   | 3.12 | 0.05 |
| E1 | TKW  | 2A | AX.89470775 | 3.19E+07 | 0.27 | -0.94    | 3.03 | 0.05 |
| E1 | TKW  | 2A | AX.89370330 | 3.19E+07 | 0.27 | -0.98    | 3.28 | 0.06 |
| E1 | GPM2 | 2A | AX.89538795 | 7.78E+08 | 0.22 | 870.13   | 4.45 | 0.08 |
| E1 | GPM2 | 2A | AX.89457700 | 7.58E+08 | 0.23 | 735.98   | 3.41 | 0.06 |
| E1 | TKW  | 2A | AX.89637133 | 7.58E+08 | 0.50 | 0.85     | 3.15 | 0.06 |
| E1 | TKW  | 2A | AX.89678558 | 7.58E+08 | 0.23 | -1.02    | 3.20 | 0.05 |
| E1 | GPM2 | 2A | AX.89686061 | 6.03E+08 | 0.07 | -1275.12 | 3.68 | 0.06 |
| E1 | TKW  | 2A | AX.89497492 | 3.25E+07 | 0.11 | -1.63    | 4.33 | 0.08 |
| E1 | TKW  | 2A | AX.89761983 | 3.19E+07 | 0.27 | -0.98    | 3.28 | 0.06 |
| E1 | TKW  | 2A | AX.89583185 | 7.55E+08 | 0.26 | -1.06    | 3.68 | 0.06 |
| E1 | TKW  | 2A | AX.89705883 | 4.28E+07 | 0.11 | -1.41    | 3.39 | 0.06 |
| E1 | TKW  | 2A | AX.89747863 | 7.55E+08 | 0.27 | -0.98    | 3.28 | 0.06 |
| E1 | TKW  | 2A | AX.89393215 | 7.56E+08 | 0.27 | -0.99    | 3.32 | 0.06 |
| E1 | GPM2 | 2A | AX.89529168 | 7.76E+08 | 0.09 | -1055.49 | 3.20 | 0.05 |
| E1 | GPM2 | 2A | AX.89553283 | 1.98E+08 | 0.47 | 661.05   | 3.78 | 0.07 |
| E1 | TKW  | 2A | AX.89610255 | 7.55E+08 | 0.27 | -1.11    | 4.04 | 0.07 |
| E1 | GPM2 | 2A | AX.89639027 | 7.59E+08 | 0.20 | 852.43   | 4.06 | 0.07 |
| E1 | TKW  | 2A | AX.89379200 | 7.46E+08 | 0.14 | -1.25    | 3.33 | 0.06 |
| E1 | TKW  | 2A | AX.89636460 | 7.55E+08 | 0.26 | -1.07    | 3.67 | 0.06 |
| E1 | TKW  | 2A | AX.89488337 | 7.55E+08 | 0.30 | -1.05    | 3.89 | 0.07 |
| E1 | GPM2 | 2A | AX.89358971 | 8.42E+07 | 0.21 | -709.87  | 3.05 | 0.05 |
| E1 | GPM2 | 2A | AX.89700087 | 6.04E+08 | 0.09 | -1132.54 | 3.76 | 0.07 |
| E1 | GPM2 | 2A | AX.89501387 | 8.39E+07 | 0.21 | -709.87  | 3.05 | 0.05 |
| E1 | GPM2 | 2A | AX.89454688 | 8.46E+07 | 0.23 | -710.38  | 3.17 | 0.05 |
| E1 | TKW  | 2A | AX.89761868 | 7.56E+08 | 0.27 | -0.99    | 3.32 | 0.06 |
| E1 | TKW  | 2A | AX.89414865 | 7.55E+08 | 0.24 | -1.09    | 3.70 | 0.06 |
| E1 | TKW  | 2A | AX.89740120 | 7.58E+08 | 0.23 | -1.02    | 3.20 | 0.05 |
| E1 | TKW  | 2A | AX.89586700 | 7.56E+08 | 0.27 | -1.09    | 3.95 | 0.07 |
| E1 | GPM2 | 2A | AX.89628287 | 8.42E+07 | 0.06 | -1455.75 | 4.12 | 0.08 |
| E1 | TKW  | 2A | AX.89610993 | 7.56E+08 | 0.16 | -1.23    | 3.50 | 0.06 |
| E1 | GPS  | 2A | AX.89610255 | 7.55E+08 | 0.27 | 1.43     | 3.86 | 0.07 |
| E1 | GPM2 | 2A | AX.89496843 | 7.78E+08 | 0.29 | 822.34   | 4.71 | 0.08 |
| E1 | TKW  | 2A | AX.89462856 | 7.58E+08 | 0.23 | -1.02    | 3.20 | 0.05 |
| E1 | TKW  | 2A | AX.89362440 | 7.57E+08 | 0.40 | 0.96     | 3.72 | 0.07 |

|    |      |    |             |          |      |          |      |      |
|----|------|----|-------------|----------|------|----------|------|------|
| E1 | TKW  | 2A | AX.89440533 | 7.55E+08 | 0.27 | -0.99    | 3.30 | 0.06 |
| E1 | GPM2 | 2A | AX.89509125 | 7.16E+07 | 0.44 | -606.98  | 3.23 | 0.06 |
| E1 | TKW  | 2A | AX.89630198 | 3.19E+07 | 0.28 | -1.01    | 3.56 | 0.06 |
| E1 | GPM2 | 2A | AX.89693178 | 7.88E+07 | 0.29 | 687.06   | 3.44 | 0.06 |
| E1 | TKW  | 2A | AX.89533629 | 3.19E+07 | 0.27 | -0.98    | 3.28 | 0.06 |
| E1 | TKW  | 2A | AX.89559533 | 3.19E+07 | 0.27 | -0.98    | 3.28 | 0.06 |
| E1 | TKW  | 2A | AX.89651278 | 4.27E+07 | 0.13 | -1.45    | 4.00 | 0.07 |
| E1 | TKW  | 2A | AX.89737649 | 7.55E+08 | 0.24 | -0.99    | 3.10 | 0.05 |
| E1 | TKW  | 2A | AX.89705764 | 7.58E+08 | 0.23 | -1.02    | 3.20 | 0.05 |
| E1 | GPM2 | 2A | AX.89425144 | 7.59E+08 | 0.20 | 852.43   | 4.06 | 0.07 |
| E1 | GPM2 | 2A | AX.89732786 | 7.79E+08 | 0.21 | 948.49   | 4.97 | 0.09 |
| E1 | TKW  | 2A | AX.89749004 | 3.19E+07 | 0.27 | -0.98    | 3.28 | 0.06 |
| E1 | TKW  | 2A | AX.89557781 | 7.55E+08 | 0.26 | -1.07    | 3.67 | 0.06 |
| E1 | TKW  | 2A | AX.89736779 | 7.58E+08 | 0.23 | -1.02    | 3.20 | 0.05 |
| E1 | GPS  | 2A | AX.89486643 | 4.86E+08 | 0.34 | 1.21     | 3.26 | 0.06 |
| E1 | GPM2 | 2A | AX.89381325 | 7.11E+07 | 0.32 | -654.74  | 3.29 | 0.06 |
| E1 | GPM2 | 2A | AX.89701633 | 7.78E+08 | 0.21 | 732.40   | 3.21 | 0.06 |
| E1 | GPM2 | 2A | AX.89317553 | 7.78E+08 | 0.22 | 870.13   | 4.45 | 0.08 |
| E1 | GPM2 | 2A | AX.89720303 | 7.60E+08 | 0.18 | 1008.92  | 4.95 | 0.09 |
| E1 | TKW  | 2A | AX.89728983 | 7.55E+08 | 0.26 | -1.07    | 3.67 | 0.06 |
| E1 | TKW  | 2A | AX.89451429 | 7.55E+08 | 0.24 | -0.99    | 3.10 | 0.05 |
| E1 | GPM2 | 2A | AX.89745955 | 8.46E+07 | 0.23 | -710.38  | 3.17 | 0.05 |
| E1 | GPM2 | 2A | AX.89568284 | 7.61E+08 | 0.20 | 888.57   | 4.30 | 0.08 |
| E1 | GPS  | 2A | AX.89751220 | 7.47E+08 | 0.21 | 1.36     | 3.11 | 0.05 |
| E1 | TKW  | 2A | AX.89601425 | 7.56E+08 | 0.27 | -0.99    | 3.30 | 0.06 |
| E1 | TKW  | 2A | AX.89460601 | 7.61E+08 | 0.23 | -1.05    | 3.33 | 0.05 |
| E1 | GPM2 | 2A | AX.89627705 | 8.65E+07 | 0.20 | -730.35  | 3.07 | 0.05 |
| E1 | GPM2 | 2A | AX.89700088 | 8.56E+07 | 0.23 | -702.76  | 3.11 | 0.05 |
| E1 | TKW  | 2A | AX.89423191 | 7.55E+08 | 0.26 | -1.06    | 3.68 | 0.06 |
| E1 | TKW  | 2A | AX.89492728 | 3.19E+07 | 0.27 | -0.98    | 3.28 | 0.06 |
| E1 | TKW  | 2A | AX.89430001 | 3.19E+07 | 0.28 | -1.01    | 3.51 | 0.06 |
| E1 | TKW  | 2A | AX.89592393 | 7.56E+08 | 0.27 | -1.09    | 3.95 | 0.07 |
| E1 | GPM2 | 2A | AX.89604444 | 7.14E+07 | 0.43 | -647.67  | 3.60 | 0.07 |
| E1 | GPM2 | 2A | AX.89722052 | 7.79E+08 | 0.20 | 819.58   | 3.79 | 0.07 |
| E1 | TKW  | 2A | AX.89619827 | 7.56E+08 | 0.27 | -0.99    | 3.32 | 0.06 |
| E1 | TKW  | 2A | AX.89516661 | 7.56E+08 | 0.27 | -1.09    | 3.95 | 0.07 |
| E1 | GPM2 | 2A | AX.89613041 | 7.76E+08 | 0.08 | -1056.70 | 3.08 | 0.05 |
| E1 | TKW  | 2A | AX.89433132 | 3.19E+07 | 0.27 | -0.98    | 3.28 | 0.06 |
| E1 | TKW  | 2A | AX.89703222 | 7.55E+08 | 0.11 | -1.46    | 3.57 | 0.06 |
| E1 | TKW  | 2A | AX.89637508 | 7.55E+08 | 0.27 | -1.11    | 4.04 | 0.07 |
| E1 | TKW  | 2A | AX.89319120 | 7.55E+08 | 0.26 | -1.06    | 3.63 | 0.06 |
| E1 | TKW  | 2A | AX.89526254 | 7.56E+08 | 0.26 | -1.00    | 3.33 | 0.06 |
| E1 | TKW  | 2A | AX.89347674 | 7.56E+08 | 0.26 | -1.01    | 3.35 | 0.06 |
| E1 | TKW  | 2A | AX.89489720 | 3.19E+07 | 0.27 | -0.98    | 3.28 | 0.06 |
| E1 | TKW  | 2A | AX.89513724 | 7.55E+08 | 0.24 | -0.99    | 3.10 | 0.05 |
| E1 | TKW  | 2A | AX.89438787 | 7.55E+08 | 0.25 | -0.96    | 3.05 | 0.05 |
| E1 | TKW  | 2A | AX.89570704 | 3.19E+07 | 0.27 | -0.98    | 3.28 | 0.06 |
| E1 | TKW  | 2A | AX.89750010 | 7.56E+08 | 0.26 | -1.00    | 3.29 | 0.06 |
| E1 | TKW  | 2A | AX.89588999 | 7.55E+08 | 0.26 | -0.96    | 3.06 | 0.05 |
| E1 | TKW  | 2A | AX.89646006 | 7.56E+08 | 0.26 | -1.01    | 3.35 | 0.06 |



|    |      |    |             |          |      |          |      |      |
|----|------|----|-------------|----------|------|----------|------|------|
| E1 | TKW  | 2A | AX.89575155 | 7.58E+08 | 0.23 | -1.02    | 3.20 | 0.05 |
| E1 | TKW  | 2A | AX.89569322 | 7.60E+08 | 0.24 | -0.98    | 3.06 | 0.05 |
| E1 | TKW  | 2A | AX.89654143 | 7.58E+08 | 0.22 | -1.02    | 3.13 | 0.05 |
| E1 | TKW  | 2A | AX.89643570 | 7.60E+08 | 0.22 | -1.03    | 3.21 | 0.05 |
| E1 | TKW  | 2A | AX.89502891 | 4.28E+07 | 0.13 | -1.55    | 4.34 | 0.07 |
| E1 | TKW  | 2A | AX.89413417 | 7.55E+08 | 0.26 | -1.07    | 3.67 | 0.06 |
| E1 | TKW  | 2A | AX.89748537 | 3.25E+07 | 0.11 | -1.63    | 4.33 | 0.08 |
| E1 | TKW  | 2A | AX.89746670 | 3.19E+07 | 0.27 | -0.96    | 3.19 | 0.06 |
| E1 | TKW  | 2A | AX.89762459 | 7.55E+08 | 0.27 | -0.98    | 3.28 | 0.06 |
| E1 | TKW  | 2A | AX.89441296 | 7.55E+08 | 0.26 | -1.06    | 3.68 | 0.06 |
| E1 | TKW  | 2A | AX.89534141 | 7.55E+08 | 0.27 | -1.02    | 3.48 | 0.06 |
| E1 | TKW  | 2A | AX.89496843 | 7.78E+08 | 0.29 | -0.96    | 3.31 | 0.06 |
| E1 | TKW  | 2A | AX.89335578 | 7.56E+08 | 0.27 | -0.99    | 3.30 | 0.06 |
| E2 | GY   | 2A | AX.89618874 | 8.56E+07 | 0.07 | -4.48    | 4.21 | 0.09 |
| E2 | GY   | 2A | AX.89597570 | 8.38E+07 | 0.09 | -3.57    | 3.56 | 0.08 |
| E2 | GY   | 2A | AX.89597570 | 8.38E+07 | 0.09 | -3.57    | 3.56 | 0.08 |
| E2 | GY   | 2A | AX.89747464 | 8.45E+07 | 0.07 | -5.25    | 5.24 | 0.12 |
| E2 | GY   | 2A | AX.89747464 | 8.45E+07 | 0.07 | -5.25    | 5.24 | 0.12 |
| E2 | SPM2 | 2A | AX.89765361 | 7.53E+08 | 0.10 | 24.04    | 4.47 | 0.08 |
| E2 | GY   | 2A | AX.89737425 | 6.97E+08 | 0.12 | -3.09    | 3.34 | 0.04 |
| E2 | GY   | 2A | AX.89510338 | 7.76E+08 | 0.08 | -3.49    | 3.15 | 0.04 |
| E2 | GY   | 2A | AX.89639258 | 8.38E+07 | 0.09 | -4.10    | 4.33 | 0.10 |
| E2 | SPM2 | 2A | AX.89382803 | 7.51E+08 | 0.12 | 21.83    | 4.29 | 0.08 |
| E2 | SPM2 | 2A | AX.89568566 | 9.98E+07 | 0.07 | 23.45    | 3.34 | 0.06 |
| E2 | GY   | 2A | AX.89336730 | 7.40E+08 | 0.09 | -3.78    | 3.81 | 0.05 |
| E2 | GY   | 2A | AX.89336730 | 7.40E+08 | 0.09 | -3.78    | 3.81 | 0.05 |
| E2 | SPM2 | 2A | AX.89344555 | 4.47E+08 | 0.08 | 21.81    | 3.23 | 0.05 |
| E2 | GY   | 2A | AX.89644181 | 7.12E+08 | 0.20 | -2.60    | 3.60 | 0.06 |
| E2 | GY   | 2A | AX.89644181 | 7.12E+08 | 0.20 | -2.60    | 3.60 | 0.06 |
| E2 | SPM2 | 2A | AX.89653353 | 7.41E+08 | 0.11 | -19.40   | 3.19 | 0.05 |
| E2 | GPM2 | 2A | AX.89770211 | 8.38E+07 | 0.08 | -954.25  | 3.23 | 0.07 |
| E2 | GY   | 2A | AX.89770211 | 8.38E+07 | 0.07 | -4.32    | 4.15 | 0.09 |
| E2 | GY   | 2A | AX.89770211 | 8.38E+07 | 0.07 | -4.32    | 4.15 | 0.09 |
| E2 | GY   | 2A | AX.89365349 | 8.39E+07 | 0.09 | -3.57    | 3.56 | 0.08 |
| E2 | GY   | 2A | AX.89534012 | 7.62E+08 | 0.14 | -3.13    | 3.95 | 0.06 |
| E2 | GY   | 2A | AX.89534012 | 7.62E+08 | 0.14 | -3.13    | 3.95 | 0.06 |
| E2 | GY   | 2A | AX.86169701 | 7.76E+08 | 0.10 | -3.24    | 3.26 | 0.04 |
| E2 | GY   | 2A | AX.86169701 | 7.76E+08 | 0.10 | -3.24    | 3.26 | 0.04 |
| E2 | GPS  | 2A | AX.89608691 | 7.00E+08 | 0.43 | -1.43    | 3.43 | 0.06 |
| E2 | GY   | 2A | AX.89414077 | 8.46E+07 | 0.07 | -5.25    | 5.24 | 0.12 |
| E2 | GY   | 2A | AX.89414077 | 8.46E+07 | 0.07 | -5.25    | 5.24 | 0.12 |
| E2 | GPS  | 2A | AX.89706552 | 7.12E+08 | 0.28 | -1.90    | 4.75 | 0.09 |
| E2 | GPS  | 2A | AX.89593956 | 7.00E+08 | 0.43 | -1.49    | 3.69 | 0.06 |
| E2 | GY   | 2A | AX.89508461 | 8.56E+07 | 0.07 | -4.48    | 4.21 | 0.09 |
| E2 | GY   | 2A | AX.89508461 | 8.56E+07 | 0.07 | -4.48    | 4.21 | 0.09 |
| E2 | GY   | 2A | AX.89343847 | 8.50E+07 | 0.06 | -5.41    | 5.17 | 0.12 |
| E2 | GY   | 2A | AX.89343847 | 8.50E+07 | 0.06 | -5.41    | 5.17 | 0.12 |
| E2 | GPM2 | 2A | AX.89488613 | 8.56E+07 | 0.07 | -1095.83 | 3.67 | 0.09 |
| E2 | GY   | 2A | AX.89344767 | 8.39E+07 | 0.09 | -3.57    | 3.56 | 0.08 |
| E2 | GY   | 2A | AX.89344767 | 8.39E+07 | 0.09 | -3.57    | 3.56 | 0.08 |

|    |      |    |             |          |      |          |      |      |
|----|------|----|-------------|----------|------|----------|------|------|
| E2 | GPS  | 2A | AX.89728760 | 6.54E+08 | 0.43 | 1.46     | 3.56 | 0.06 |
| E2 | GY   | 2A | AX.89382939 | 8.63E+07 | 0.07 | -4.48    | 4.21 | 0.09 |
| E2 | GY   | 2A | AX.89382939 | 8.63E+07 | 0.07 | -4.48    | 4.21 | 0.09 |
| E2 | GY   | 2A | AX.89670276 | 7.51E+08 | 0.06 | -5.12    | 4.69 | 0.10 |
| E2 | GY   | 2A | AX.89670276 | 7.51E+08 | 0.06 | -5.12    | 4.69 | 0.10 |
| E2 | TKW  | 2A | AX.89359914 | 7.61E+08 | 0.26 | -1.22    | 4.11 | 0.07 |
| E2 | GY   | 2A | AX.89365349 | 8.39E+07 | 0.09 | -3.57    | 3.56 | 0.08 |
| E2 | GY   | 2A | AX.89776727 | 8.39E+07 | 0.09 | -3.57    | 3.56 | 0.08 |
| E2 | GY   | 2A | AX.89776727 | 8.39E+07 | 0.09 | -3.57    | 3.56 | 0.08 |
| E2 | GY   | 2A | AX.89321824 | 8.38E+07 | 0.09 | -3.57    | 3.56 | 0.08 |
| E2 | GY   | 2A | AX.89321824 | 8.38E+07 | 0.09 | -3.57    | 3.56 | 0.08 |
| E2 | TKW  | 2A | AX.89689821 | 7.55E+08 | 0.24 | -1.04    | 3.01 | 0.05 |
| E2 | GY   | 2A | AX.89569793 | 8.46E+07 | 0.07 | -5.25    | 5.24 | 0.12 |
| E2 | GY   | 2A | AX.89569793 | 8.46E+07 | 0.07 | -5.25    | 5.24 | 0.12 |
| E2 | GY   | 2A | AX.89628287 | 8.42E+07 | 0.06 | -5.61    | 5.52 | 0.12 |
| E2 | GY   | 2A | AX.89513340 | 7.03E+08 | 0.40 | -2.03    | 3.35 | 0.05 |
| E2 | GY   | 2A | AX.89513340 | 7.03E+08 | 0.40 | -2.03    | 3.35 | 0.05 |
| E2 | GY   | 2A | AX.89765381 | 7.62E+08 | 0.14 | -2.88    | 3.46 | 0.06 |
| E2 | GY   | 2A | AX.89765381 | 7.62E+08 | 0.14 | -2.88    | 3.46 | 0.06 |
| E2 | GY   | 2A | AX.89608084 | 8.39E+07 | 0.09 | -3.57    | 3.56 | 0.08 |
| E2 | GY   | 2A | AX.89608084 | 8.39E+07 | 0.09 | -3.57    | 3.56 | 0.08 |
| E2 | GY   | 2A | AX.89766787 | 7.03E+08 | 0.40 | -2.03    | 3.35 | 0.05 |
| E2 | GY   | 2A | AX.89409852 | 7.76E+08 | 0.10 | -3.48    | 3.54 | 0.04 |
| E2 | GY   | 2A | AX.89409852 | 7.76E+08 | 0.10 | -3.48    | 3.54 | 0.04 |
| E2 | GPS  | 2A | AX.89441954 | 7.12E+08 | 0.49 | -1.36    | 3.19 | 0.05 |
| E2 | GY   | 2A | AX.89480595 | 8.56E+07 | 0.07 | -4.48    | 4.21 | 0.09 |
| E2 | GY   | 2A | AX.89480595 | 8.56E+07 | 0.07 | -4.48    | 4.21 | 0.09 |
| E2 | TKW  | 2A | AX.89414865 | 7.55E+08 | 0.24 | -1.11    | 3.36 | 0.05 |
| E2 | TKW  | 2A | AX.89584181 | 4.28E+07 | 0.13 | -1.63    | 4.28 | 0.08 |
| E2 | GY   | 2A | AX.89618874 | 8.56E+07 | 0.07 | -4.48    | 4.21 | 0.09 |
| E2 | GPM2 | 2A | AX.89745404 | 8.42E+07 | 0.06 | -1148.92 | 3.74 | 0.09 |
| E2 | GY   | 2A | AX.89662622 | 8.42E+07 | 0.09 | -3.57    | 3.56 | 0.08 |
| E2 | GY   | 2A | AX.89367851 | 7.62E+08 | 0.17 | -2.52    | 3.02 | 0.04 |
| E2 | GY   | 2A | AX.89367851 | 7.62E+08 | 0.17 | -2.52    | 3.02 | 0.04 |
| E2 | GY   | 2A | AX.89737425 | 6.97E+08 | 0.12 | -3.09    | 3.34 | 0.04 |
| E2 | GY   | 2A | AX.89510338 | 7.76E+08 | 0.08 | -3.49    | 3.15 | 0.04 |
| E2 | GY   | 2A | AX.89639258 | 8.38E+07 | 0.09 | -4.10    | 4.33 | 0.10 |
| E2 | GY   | 2A | AX.89706225 | 8.42E+07 | 0.07 | -5.25    | 5.24 | 0.12 |
| E2 | GY   | 2A | AX.89706225 | 8.42E+07 | 0.07 | -5.25    | 5.24 | 0.12 |
| E2 | TKW  | 2A | AX.89586614 | 4.32E+07 | 0.12 | -1.67    | 4.31 | 0.08 |
| E2 | GPS  | 2A | AX.89311201 | 7.15E+08 | 0.32 | -1.43    | 3.12 | 0.05 |
| E2 | GPS  | 2A | AX.89331545 | 7.18E+08 | 0.48 | -1.38    | 3.26 | 0.06 |
| E2 | GPS  | 2A | AX.89570522 | 7.12E+08 | 0.24 | -1.72    | 3.63 | 0.07 |
| E2 | GPS  | 2A | AX.89726681 | 7.00E+08 | 0.43 | -1.41    | 3.33 | 0.06 |
| E2 | GY   | 2A | AX.89420517 | 8.39E+07 | 0.09 | -3.57    | 3.56 | 0.08 |
| E2 | GY   | 2A | AX.89742073 | 7.76E+08 | 0.08 | -3.49    | 3.15 | 0.04 |
| E2 | GY   | 2A | AX.89742073 | 7.76E+08 | 0.08 | -3.49    | 3.15 | 0.04 |
| E2 | GY   | 2A | AX.89766787 | 7.03E+08 | 0.40 | -2.03    | 3.35 | 0.05 |
| E2 | GPM2 | 2A | AX.89414077 | 8.46E+07 | 0.07 | -1095.83 | 3.67 | 0.09 |
| E2 | GY   | 2A | AX.89500395 | 7.63E+08 | 0.15 | -3.08    | 4.05 | 0.06 |

|    |      |    |             |          |      |          |      |      |
|----|------|----|-------------|----------|------|----------|------|------|
| E2 | GY   | 2A | AX.89500395 | 7.63E+08 | 0.15 | -3.08    | 4.05 | 0.06 |
| E2 | GPM2 | 2A | AX.89343847 | 8.50E+07 | 0.06 | -1080.21 | 3.36 | 0.08 |
| E2 | GPS  | 2A | AX.89565323 | 7.00E+08 | 0.43 | -1.41    | 3.36 | 0.06 |
| E2 | GY   | 2A | AX.89508618 | 8.56E+07 | 0.07 | -4.48    | 4.21 | 0.09 |
| E2 | TKW  | 2A | AX.89651278 | 4.27E+07 | 0.13 | -1.64    | 4.43 | 0.08 |
| E2 | GY   | 2A | AX.89610686 | 8.42E+07 | 0.06 | -5.55    | 5.42 | 0.12 |
| E2 | GY   | 2A | AX.89610686 | 8.42E+07 | 0.06 | -5.55    | 5.42 | 0.12 |
| E2 | GPS  | 2A | AX.89598382 | 7.12E+08 | 0.29 | -1.89    | 4.76 | 0.09 |
| E2 | TKW  | 2A | AX.89319120 | 7.55E+08 | 0.25 | -1.05    | 3.18 | 0.05 |
| E2 | TKW  | 2A | AX.89455758 | 7.61E+08 | 0.43 | -0.93    | 3.21 | 0.05 |
| E2 | GPS  | 2A | AX.89652949 | 7.19E+08 | 0.31 | -1.42    | 3.01 | 0.06 |
| E2 | GY   | 2A | AX.89343827 | 8.63E+07 | 0.07 | -4.48    | 4.21 | 0.09 |
| E2 | GY   | 2A | AX.89343827 | 8.63E+07 | 0.07 | -4.48    | 4.21 | 0.09 |
| E2 | TKW  | 2A | AX.89365566 | 7.55E+08 | 0.26 | -1.05    | 3.20 | 0.05 |
| E2 | GY   | 2A | AX.89662622 | 8.42E+07 | 0.09 | -3.57    | 3.56 | 0.08 |
| E2 | GPS  | 2A | AX.89753712 | 7.19E+08 | 0.31 | -1.42    | 3.01 | 0.06 |
| E2 | GPM2 | 2A | AX.89549965 | 6.04E+08 | 0.08 | -935.71  | 3.47 | 0.07 |
| E2 | GPS  | 2A | AX.89326165 | 7.12E+08 | 0.28 | -1.90    | 4.75 | 0.09 |
| E2 | GPS  | 2A | AX.89775314 | 7.11E+08 | 0.22 | -1.63    | 3.12 | 0.06 |
| E2 | GPS  | 2A | AX.89662434 | 6.40E+08 | 0.47 | 1.43     | 3.45 | 0.06 |
| E2 | GY   | 2A | AX.89568437 | 7.62E+08 | 0.13 | -3.12    | 3.67 | 0.06 |
| E2 | GY   | 2A | AX.89568437 | 7.62E+08 | 0.13 | -3.12    | 3.67 | 0.06 |
| E2 | GY   | 2A | AX.89605140 | 8.42E+07 | 0.09 | -4.10    | 4.33 | 0.10 |
| E2 | GY   | 2A | AX.89605140 | 8.42E+07 | 0.09 | -4.10    | 4.33 | 0.10 |
| E2 | GY   | 2A | AX.89628287 | 8.42E+07 | 0.06 | -5.61    | 5.52 | 0.12 |
| E2 | GY   | 2A | AX.89429525 | 8.42E+07 | 0.07 | -5.25    | 5.24 | 0.12 |
| E2 | GY   | 2A | AX.89429525 | 8.42E+07 | 0.07 | -5.25    | 5.24 | 0.12 |
| E2 | GPS  | 2A | AX.89380553 | 7.19E+08 | 0.46 | 1.33     | 3.05 | 0.06 |
| E2 | GY   | 2A | AX.89488613 | 8.56E+07 | 0.07 | -5.25    | 5.24 | 0.12 |
| E2 | GY   | 2A | AX.89488613 | 8.56E+07 | 0.07 | -5.25    | 5.24 | 0.12 |
| E2 | TKW  | 2A | AX.89345671 | 4.28E+07 | 0.12 | -1.53    | 3.72 | 0.06 |
| E2 | TKW  | 2A | AX.89705883 | 4.28E+07 | 0.11 | -1.46    | 3.23 | 0.05 |
| E2 | GPS  | 2A | AX.89699925 | 7.00E+08 | 0.43 | -1.43    | 3.43 | 0.06 |
| E2 | GPS  | 2A | AX.89453912 | 7.00E+08 | 0.43 | -1.43    | 3.43 | 0.06 |
| E2 | GPS  | 2A | AX.89627604 | 7.13E+08 | 0.20 | -1.79    | 3.45 | 0.05 |
| E2 | GPM2 | 2A | AX.89706225 | 8.42E+07 | 0.07 | -1095.83 | 3.67 | 0.09 |
| E2 | GY   | 2A | AX.89420517 | 8.39E+07 | 0.09 | -3.57    | 3.56 | 0.08 |
| E2 | GPS  | 2A | AX.89655607 | 7.13E+08 | 0.13 | -2.13    | 3.43 | 0.07 |
| E2 | TKW  | 2A | AX.89583185 | 7.55E+08 | 0.26 | -1.05    | 3.20 | 0.05 |
| E2 | GY   | 2A | AX.89745404 | 8.42E+07 | 0.06 | -5.61    | 5.52 | 0.12 |
| E2 | GPS  | 2A | AX.89677861 | 7.12E+08 | 0.22 | -1.63    | 3.12 | 0.06 |
| E2 | TKW  | 2A | AX.89610255 | 7.55E+08 | 0.26 | -1.13    | 3.70 | 0.06 |
| E2 | GPS  | 2A | AX.89487305 | 7.03E+08 | 0.50 | -1.52    | 3.88 | 0.07 |
| E2 | TKW  | 2A | AX.89553707 | 7.60E+08 | 0.23 | -1.11    | 3.24 | 0.05 |
| E2 | GY   | 2A | AX.89652948 | 8.63E+07 | 0.07 | -4.58    | 4.11 | 0.09 |
| E2 | GY   | 2A | AX.89652948 | 8.63E+07 | 0.07 | -4.58    | 4.11 | 0.09 |
| E2 | GY   | 2A | AX.89569105 | 7.76E+08 | 0.08 | -3.49    | 3.15 | 0.04 |
| E2 | GY   | 2A | AX.89569105 | 7.76E+08 | 0.08 | -3.49    | 3.15 | 0.04 |
| E2 | TKW  | 2A | AX.89413417 | 7.55E+08 | 0.25 | -1.06    | 3.22 | 0.05 |
| E2 | TKW  | 2A | AX.89752134 | 7.55E+08 | 0.25 | -1.06    | 3.22 | 0.05 |

|    |      |    |             |          |      |          |      |      |
|----|------|----|-------------|----------|------|----------|------|------|
| E2 | TKW  | 2A | AX.89460601 | 7.61E+08 | 0.23 | -1.12    | 3.34 | 0.06 |
| E2 | GPS  | 2A | AX.89675494 | 7.13E+08 | 0.20 | -1.79    | 3.45 | 0.05 |
| E2 | GY   | 2A | AX.89721986 | 8.63E+07 | 0.07 | -4.48    | 4.21 | 0.09 |
| E2 | GY   | 2A | AX.89721986 | 8.63E+07 | 0.07 | -4.48    | 4.21 | 0.09 |
| E2 | GPS  | 2A | AX.89597251 | 7.12E+08 | 0.22 | -1.63    | 3.12 | 0.06 |
| E2 | TKW  | 2A | AX.89408055 | 7.55E+08 | 0.26 | -1.05    | 3.20 | 0.05 |
| E2 | TKW  | 2A | AX.89751420 | 7.60E+08 | 0.43 | -0.94    | 3.28 | 0.05 |
| E2 | TKW  | 2A | AX.89637508 | 7.55E+08 | 0.26 | -1.13    | 3.70 | 0.06 |
| E2 | GY   | 2A | AX.89508618 | 8.56E+07 | 0.07 | -4.48    | 4.21 | 0.09 |
| E2 | GPS  | 2A | AX.89491141 | 7.03E+08 | 0.50 | -1.52    | 3.88 | 0.07 |
| E2 | TKW  | 2A | AX.89569322 | 7.60E+08 | 0.24 | -1.06    | 3.09 | 0.05 |
| E2 | GY   | 2A | AX.89745404 | 8.42E+07 | 0.06 | -5.61    | 5.52 | 0.12 |
| E2 | GPS  | 2A | AX.89534207 | 7.00E+08 | 0.43 | -1.43    | 3.43 | 0.06 |
| E2 | GY   | 2A | AX.89642711 | 8.38E+07 | 0.09 | -3.57    | 3.56 | 0.08 |
| E2 | GY   | 2A | AX.89642711 | 8.38E+07 | 0.09 | -3.57    | 3.56 | 0.08 |
| E2 | GPM2 | 2A | AX.89437001 | 6.04E+08 | 0.08 | -935.71  | 3.47 | 0.07 |
| E2 | GPM2 | 2A | AX.89334194 | 6.03E+08 | 0.11 | -786.50  | 3.14 | 0.06 |
| E2 | TKW  | 2A | AX.89452594 | 7.55E+08 | 0.26 | -1.05    | 3.20 | 0.05 |
| E2 | GY   | 2A | AX.89613041 | 7.76E+08 | 0.08 | -3.49    | 3.15 | 0.04 |
| E2 | GY   | 2A | AX.89613041 | 7.76E+08 | 0.08 | -3.49    | 3.15 | 0.04 |
| E2 | GPS  | 2A | AX.89631539 | 7.00E+08 | 0.43 | -1.41    | 3.33 | 0.06 |
| E2 | TKW  | 2A | AX.89423191 | 7.55E+08 | 0.26 | -1.05    | 3.20 | 0.05 |
| E2 | GPM2 | 2A | AX.89639258 | 8.38E+07 | 0.09 | -927.77  | 3.51 | 0.08 |
| E2 | GPS  | 2A | AX.89722531 | 7.13E+08 | 0.20 | -1.79    | 3.45 | 0.05 |
| E2 | TKW  | 2A | AX.89580653 | 7.55E+08 | 0.23 | -1.12    | 3.39 | 0.06 |
| E2 | TKW  | 2A | AX.89575538 | 7.55E+08 | 0.25 | -1.06    | 3.22 | 0.05 |
| E2 | GPM2 | 2A | AX.89628287 | 8.42E+07 | 0.06 | -1148.92 | 3.74 | 0.09 |
| E2 | TKW  | 2A | AX.89678473 | 7.59E+08 | 0.33 | -0.96    | 3.07 | 0.05 |
| E2 | GPS  | 2A | AX.89630984 | 7.03E+08 | 0.50 | -1.52    | 3.88 | 0.07 |
| E2 | GPS  | 2A | AX.89625036 | 6.53E+08 | 0.43 | 1.46     | 3.56 | 0.06 |
| E2 | GPS  | 2A | AX.89492668 | 7.13E+08 | 0.20 | -1.79    | 3.45 | 0.05 |
| E2 | TKW  | 2A | AX.89643570 | 7.60E+08 | 0.23 | -1.11    | 3.24 | 0.05 |
| E2 | GPS  | 2A | AX.89557526 | 7.03E+08 | 0.50 | -1.52    | 3.88 | 0.07 |
| E2 | GPM2 | 2A | AX.89569793 | 8.46E+07 | 0.07 | -1095.83 | 3.67 | 0.09 |
| E2 | GPM2 | 2A | AX.89429525 | 8.42E+07 | 0.07 | -1095.83 | 3.67 | 0.09 |
| E2 | TKW  | 2A | AX.89728983 | 7.55E+08 | 0.25 | -1.06    | 3.22 | 0.05 |
| E2 | GPS  | 2A | AX.89710690 | 7.12E+08 | 0.19 | -1.71    | 3.16 | 0.06 |
| E2 | TKW  | 2A | AX.89441296 | 7.55E+08 | 0.26 | -1.05    | 3.20 | 0.05 |
| E2 | GPM2 | 2A | AX.89610686 | 8.42E+07 | 0.06 | -1222.90 | 4.18 | 0.10 |
| E2 | GPS  | 2A | AX.89317775 | 7.13E+08 | 0.13 | -2.13    | 3.43 | 0.07 |
| E2 | TKW  | 2A | AX.89502891 | 4.28E+07 | 0.13 | -1.54    | 3.87 | 0.07 |
| E2 | TKW  | 2A | AX.89530131 | 7.55E+08 | 0.26 | -1.13    | 3.70 | 0.06 |
| E2 | TKW  | 2A | AX.89374034 | 7.55E+08 | 0.26 | -1.05    | 3.20 | 0.05 |
| E2 | GPM2 | 2A | AX.89605140 | 8.42E+07 | 0.09 | -927.77  | 3.51 | 0.08 |
| E2 | TKW  | 2A | AX.89562993 | 7.55E+08 | 0.26 | -1.05    | 3.20 | 0.05 |
| E2 | TKW  | 2A | AX.89573905 | 7.55E+08 | 0.23 | -1.12    | 3.39 | 0.06 |
| E2 | GPS  | 2A | AX.89644181 | 7.12E+08 | 0.19 | -2.11    | 4.52 | 0.09 |
| E2 | TKW  | 2A | AX.89375933 | 7.55E+08 | 0.26 | -1.05    | 3.20 | 0.05 |
| E2 | TKW  | 2A | AX.89630473 | 7.58E+08 | 0.11 | 1.60     | 3.77 | 0.07 |
| E2 | TKW  | 2A | AX.89437827 | 7.11E+08 | 0.14 | 1.33     | 3.16 | 0.06 |

|    |      |    |               |          |      |          |      |      |
|----|------|----|---------------|----------|------|----------|------|------|
| E2 | GPM2 | 2A | AX.89747464   | 8.45E+07 | 0.07 | -1095.83 | 3.67 | 0.09 |
| E2 | TKW  | 2A | AX.89636460   | 7.55E+08 | 0.25 | -1.06    | 3.22 | 0.05 |
| E2 | GPS  | 2A | AX.89535340   | 7.03E+08 | 0.49 | -1.51    | 3.81 | 0.06 |
| E2 | TKW  | 2A | AX.89557781   | 7.55E+08 | 0.25 | -1.06    | 3.22 | 0.05 |
| E2 | GPM2 | 2A | AX.89466371   | 6.04E+08 | 0.08 | -935.71  | 3.47 | 0.07 |
| E3 | GPM2 | 2A | AX.89415024   | 7.70E+08 | 0.26 | 985.17   | 3.07 | 0.10 |
| E3 | GPM2 | 2A | AX.89711562   | 7.70E+08 | 0.29 | 1004.47  | 3.47 | 0.10 |
| E3 | GPM2 | 2A | AX.89478074   | 7.70E+08 | 0.27 | 952.99   | 3.01 | 0.10 |
| E3 | GPM2 | 2A | AX.89458713   | 7.70E+08 | 0.27 | 1074.00  | 3.61 | 0.11 |
| E3 | GPM2 | 2A | AX.89439261   | 7.70E+08 | 0.26 | 1012.72  | 3.24 | 0.10 |
| E3 | GPM2 | 2A | AX.89627764   | 7.71E+08 | 0.36 | -883.57  | 3.02 | 0.07 |
| E3 | GPS  | 2A | AX.89463787   | 8.23E+07 | 0.14 | 3.15     | 3.60 | 0.11 |
| E3 | GPS  | 2A | AX.89619058   | 8.24E+07 | 0.14 | 3.15     | 3.60 | 0.11 |
| E3 | GPS  | 2A | AX.89688431   | 8.28E+07 | 0.17 | 2.72     | 3.21 | 0.09 |
| E3 | GPS  | 2A | AX.89640537   | 8.92E+07 | 0.14 | 2.86     | 3.09 | 0.08 |
| E3 | GPS  | 2A | AX.89450367   | 8.95E+07 | 0.13 | 3.05     | 3.24 | 0.08 |
| E3 | GPS  | 2A | AX.89559829   | 7.92E+07 | 0.26 | 2.53     | 3.74 | 0.08 |
| E3 | GPS  | 2A | AX.89433178   | 7.92E+07 | 0.26 | 2.53     | 3.74 | 0.08 |
| E3 | GPS  | 2A | AX.89394956   | 7.92E+07 | 0.26 | 2.53     | 3.74 | 0.08 |
| E3 | GPS  | 2A | AX.89312435   | 7.92E+07 | 0.26 | 2.53     | 3.74 | 0.08 |
| E3 | GPS  | 2A | AX.89656483   | 8.05E+07 | 0.19 | 2.44     | 3.01 | 0.07 |
| E3 | GPS  | 2A | AX.89578301   | 8.05E+07 | 0.20 | 2.49     | 3.15 | 0.07 |
| E3 | GPS  | 2A | AX.89356336   | 8.21E+07 | 0.13 | 3.08     | 3.41 | 0.10 |
| E3 | GPS  | 2A | X.89624808_OT | 8.21E+07 | 0.14 | 3.15     | 3.60 | 0.11 |
| E3 | GPS  | 2A | X.89717181_OT | 8.21E+07 | 0.14 | 3.15     | 3.60 | 0.11 |
| E3 | GPS  | 2A | X.89492810_OT | 8.22E+07 | 0.14 | 3.15     | 3.60 | 0.11 |
| E3 | GPS  | 2A | X.89545434_OT | 8.22E+07 | 0.14 | 3.15     | 3.60 | 0.11 |
| E3 | GPS  | 2A | X.89694744_OT | 8.22E+07 | 0.14 | 3.15     | 3.60 | 0.11 |
| E3 | GPS  | 2A | X.89603279_OT | 8.22E+07 | 0.14 | 3.15     | 3.60 | 0.11 |
| E3 | GPS  | 2A | AX.89712432   | 8.22E+07 | 0.18 | 2.61     | 3.12 | 0.08 |
| E3 | GPS  | 2A | X.89596030_OT | 8.22E+07 | 0.14 | 3.15     | 3.60 | 0.11 |
| E3 | GPS  | 2A | X.89650633_OT | 8.22E+07 | 0.14 | 3.15     | 3.60 | 0.11 |
| E3 | GPS  | 2A | AX.89609600   | 8.22E+07 | 0.18 | 2.61     | 3.12 | 0.08 |
| E3 | GPS  | 2A | AX.89396825   | 8.22E+07 | 0.14 | 3.15     | 3.60 | 0.11 |
| E3 | GPS  | 2A | AX.89739062   | 8.22E+07 | 0.14 | 3.15     | 3.60 | 0.11 |
| E3 | GPS  | 2A | AX.89381836   | 8.23E+07 | 0.18 | 2.61     | 3.12 | 0.08 |
| E3 | GY   | 2A | AX.89574661   | 5.85E+07 | 0.36 | 3.12     | 3.32 | 0.10 |
| E3 | GY   | 2A | AX.89613371   | 5.85E+07 | 0.35 | 2.94     | 3.05 | 0.10 |
| E3 | GY   | 2A | AX.89680495   | 5.85E+07 | 0.36 | 3.14     | 3.39 | 0.10 |
| E3 | GY   | 2A | AX.89673524   | 5.85E+07 | 0.35 | 2.94     | 3.05 | 0.10 |
| E3 | GY   | 2A | AX.89388636   | 5.86E+07 | 0.35 | 2.94     | 3.05 | 0.10 |
| E3 | GY   | 2A | AX.89496743   | 5.86E+07 | 0.35 | 2.94     | 3.05 | 0.10 |
| E3 | GY   | 2A | AX.89694611   | 5.86E+07 | 0.35 | 2.94     | 3.05 | 0.10 |
| E3 | GY   | 2A | AX.89768257   | 5.86E+07 | 0.35 | 2.94     | 3.05 | 0.10 |
| E3 | GY   | 2A | AX.89538948   | 5.86E+07 | 0.35 | 2.94     | 3.05 | 0.10 |
| E3 | GY   | 2A | AX.89531893   | 5.87E+07 | 0.35 | 3.18     | 3.51 | 0.10 |
| E3 | GY   | 2A | AX.89642236   | 5.87E+07 | 0.35 | 2.94     | 3.05 | 0.10 |
| E3 | GY   | 2A | AX.89733897   | 5.87E+07 | 0.35 | 2.94     | 3.05 | 0.10 |
| E3 | GY   | 2A | AX.89487115   | 9.81E+07 | 0.17 | 3.85     | 3.33 | 0.04 |
| E3 | GY   | 2A | AX.89703640   | 7.13E+08 | 0.20 | 3.44     | 3.09 | 0.03 |

|    |      |    |             |          |      |         |      |      |
|----|------|----|-------------|----------|------|---------|------|------|
| E3 | GY   | 2A | AX.89715805 | 7.13E+08 | 0.20 | 3.44    | 3.09 | 0.03 |
| E3 | GPS  | 2A | AX.89723340 | 3.18E+07 | 0.10 | -3.22   | 3.02 | 0.04 |
| E3 | GPS  | 2A | AX.89669753 | 7.86E+07 | 0.25 | 2.60    | 3.87 | 0.09 |
| E3 | GPS  | 2A | AX.89388899 | 7.86E+07 | 0.25 | 2.60    | 3.87 | 0.09 |
| E3 | GPS  | 2A | AX.89738519 | 7.86E+07 | 0.25 | 2.60    | 3.87 | 0.09 |
| E3 | GPS  | 2A | AX.89757105 | 7.86E+07 | 0.25 | 2.60    | 3.87 | 0.09 |
| E3 | GPS  | 2A | AX.89426364 | 7.86E+07 | 0.24 | 2.46    | 3.47 | 0.08 |
| E3 | GPS  | 2A | AX.89520142 | 7.87E+07 | 0.25 | 2.60    | 3.87 | 0.09 |
| E3 | GPS  | 2A | AX.89650961 | 7.87E+07 | 0.25 | 2.60    | 3.87 | 0.09 |
| E3 | GPS  | 2A | AX.89539982 | 7.87E+07 | 0.25 | 2.60    | 3.87 | 0.09 |
| E3 | GPS  | 2A | AX.89393031 | 7.88E+07 | 0.20 | 2.43    | 3.03 | 0.05 |
| E3 | GPS  | 2A | AX.89348583 | 7.88E+07 | 0.25 | 2.60    | 3.87 | 0.09 |
| E3 | GPS  | 2A | AX.89351614 | 7.88E+07 | 0.25 | 2.60    | 3.87 | 0.09 |
| E3 | GPS  | 2A | AX.89523442 | 7.88E+07 | 0.25 | 2.60    | 3.87 | 0.09 |
| E3 | GPS  | 2A | AX.89645760 | 7.88E+07 | 0.26 | 2.68    | 4.18 | 0.10 |
| E3 | GPS  | 2A | AX.89519482 | 7.88E+07 | 0.26 | 2.53    | 3.74 | 0.08 |
| E3 | GPS  | 2A | AX.89617969 | 7.88E+07 | 0.26 | 2.61    | 4.04 | 0.09 |
| E3 | GPS  | 2A | AX.89670101 | 7.88E+07 | 0.26 | 2.61    | 4.04 | 0.09 |
| E3 | GPS  | 2A | AX.89529344 | 7.88E+07 | 0.25 | 2.49    | 3.59 | 0.08 |
| E3 | GPS  | 2A | AX.89759916 | 7.88E+07 | 0.26 | 2.53    | 3.74 | 0.08 |
| E3 | GPS  | 2A | AX.89752332 | 7.88E+07 | 0.26 | 2.53    | 3.74 | 0.08 |
| E3 | GPS  | 2A | AX.89762994 | 7.88E+07 | 0.26 | 2.53    | 3.74 | 0.08 |
| E3 | GPS  | 2A | AX.89617348 | 7.88E+07 | 0.26 | 2.53    | 3.74 | 0.08 |
| E3 | GPS  | 2A | AX.89643234 | 7.88E+07 | 0.26 | 2.53    | 3.74 | 0.08 |
| E3 | GPS  | 2A | AX.89520042 | 7.89E+07 | 0.26 | 2.53    | 3.74 | 0.08 |
| E3 | GPS  | 2A | AX.89769687 | 7.89E+07 | 0.26 | 2.53    | 3.74 | 0.08 |
| E3 | GPS  | 2A | AX.89459735 | 7.89E+07 | 0.26 | 2.61    | 4.04 | 0.09 |
| E3 | GPS  | 2A | AX.89778244 | 7.89E+07 | 0.26 | 2.53    | 3.74 | 0.08 |
| E3 | GPS  | 2A | AX.89640288 | 7.90E+07 | 0.26 | 2.53    | 3.74 | 0.08 |
| E3 | GPS  | 2A | AX.89387048 | 7.92E+07 | 0.26 | 2.53    | 3.74 | 0.08 |
| E3 | GPS  | 2A | AX.89608481 | 7.92E+07 | 0.26 | 2.52    | 3.72 | 0.09 |
| E3 | SPM2 | 2A | AX.89335172 | 7.51E+08 | 0.43 | -19.05  | 3.00 | 0.07 |
| E3 | SPM2 | 2A | AX.89528587 | 7.51E+08 | 0.42 | -19.15  | 3.02 | 0.07 |
| E3 | SPM2 | 2A | AX.89654831 | 7.51E+08 | 0.39 | -21.10  | 3.49 | 0.06 |
| E3 | SPM2 | 2A | AX.89537145 | 7.51E+08 | 0.39 | -21.10  | 3.49 | 0.06 |
| E3 | SPM2 | 2A | AX.89458713 | 7.70E+08 | 0.24 | 24.74   | 3.31 | 0.06 |
| E3 | SPM2 | 2A | AX.89439261 | 7.70E+08 | 0.24 | 23.73   | 3.04 | 0.06 |
| E3 | TKW  | 2A | AX.89657156 | 7.41E+08 | 0.48 | -0.88   | 3.36 | 0.01 |
| E3 | TKW  | 2A | AX.89612894 | 7.41E+08 | 0.47 | -0.88   | 3.38 | 0.02 |
| E3 | TKW  | 2A | AX.89476953 | 7.41E+08 | 0.49 | -0.83   | 3.03 | 0.01 |
| E3 | TKW  | 2A | AX.89494740 | 7.81E+08 | 0.27 | 0.96    | 3.05 | 0.11 |
| E4 | GPM2 | 2A | AX.89346671 | 7.37E+08 | 0.33 | 504.95  | 3.06 | 0.08 |
| E4 | GPM2 | 2A | AX.89383546 | 7.75E+08 | 0.32 | -493.22 | 3.22 | 0.05 |
| E4 | GPM2 | 2A | AX.89563018 | 7.75E+08 | 0.32 | -493.22 | 3.22 | 0.05 |
| E4 | GPM2 | 2A | AX.89694535 | 7.75E+08 | 0.32 | -493.22 | 3.22 | 0.05 |
| E4 | GPM2 | 2A | AX.89527623 | 7.78E+08 | 0.07 | -833.52 | 3.09 | 0.05 |
| E4 | GPM2 | 2A | AX.89734662 | 6.82E+07 | 0.32 | -493.22 | 3.22 | 0.05 |
| E4 | GPM2 | 2A | AX.89313920 | 7.37E+08 | 0.33 | 504.62  | 3.04 | 0.08 |
| E4 | GPM2 | 2A | AX.89320627 | 7.37E+08 | 0.33 | 504.62  | 3.04 | 0.08 |
| E4 | GPS  | 2A | AX.89591424 | 5.97E+08 | 0.38 | -1.57   | 3.22 | 0.06 |

|    |      |    |             |          |      |       |      |      |
|----|------|----|-------------|----------|------|-------|------|------|
| E4 | GPS  | 2A | AX.89542280 | 6.08E+08 | 0.11 | -2.62 | 3.29 | 0.08 |
| E4 | GPS  | 2A | AX.89682622 | 7.04E+08 | 0.10 | 2.48  | 3.31 | 0.04 |
| E4 | GPS  | 2A | AX.89582787 | 7.06E+08 | 0.05 | 3.65  | 3.92 | 0.07 |
| E4 | GY   | 2A | AX.89698177 | 3.64E+07 | 0.08 | -2.75 | 3.42 | 0.05 |
| E4 | GY   | 2A | AX.89593047 | 6.21E+08 | 0.12 | -2.50 | 3.34 | 0.07 |
| E4 | GY   | 2A | AX.89766980 | 7.56E+08 | 0.36 | -1.52 | 3.00 | 0.05 |
| E4 | GY   | 2A | AX.89509202 | 7.57E+08 | 0.42 | -1.50 | 3.08 | 0.05 |
| E4 | GY   | 2A | AX.89755911 | 7.57E+08 | 0.41 | -1.51 | 3.09 | 0.05 |
| E4 | GY   | 2A | AX.89354258 | 7.75E+08 | 0.13 | -2.14 | 3.03 | 0.04 |
| E4 | GY   | 2A | AX.89412806 | 7.75E+08 | 0.11 | -2.37 | 3.19 | 0.04 |
| E4 | GY   | 2A | AX.89320131 | 7.76E+08 | 0.11 | -2.33 | 3.18 | 0.04 |
| E4 | GY   | 2A | AX.89527623 | 7.78E+08 | 0.07 | -2.94 | 3.32 | 0.05 |
| E4 | SPM2 | 2A | AX.89553348 | 7.01E+08 | 0.21 | 21.95 | 3.50 | 0.07 |
| E4 | SPM2 | 2A | AX.89448509 | 7.02E+08 | 0.18 | 21.92 | 3.17 | 0.07 |
| E4 | TKW  | 2A | AX.89653751 | 7.03E+08 | 0.20 | -1.23 | 3.75 | 0.07 |
| E1 | GY   | 2B | AX.89376677 | 1.82E+08 | 0.13 | -4.62 | 5.44 | 0.10 |
| E1 | GY   | 2B | AX.89381154 | 7.57E+08 | 0.06 | -5.75 | 3.97 | 0.06 |
| E1 | GY   | 2B | AX.89454254 | 1.01E+08 | 0.07 | -4.61 | 3.07 | 0.06 |
| E1 | GY   | 2B | AX.89449676 | 1.84E+08 | 0.14 | -3.69 | 3.76 | 0.07 |
| E1 | GY   | 2B | AX.89404329 | 9.74E+06 | 0.27 | -2.52 | 3.01 | 0.04 |
| E1 | GY   | 2B | AX.89327795 | 1.39E+08 | 0.08 | -5.46 | 4.81 | 0.09 |
| E1 | GY   | 2B | AX.89470805 | 1.76E+07 | 0.25 | 2.63  | 3.05 | 0.03 |
| E1 | GY   | 2B | AX.89452576 | 3.18E+05 | 0.27 | -2.52 | 3.01 | 0.04 |
| E1 | GY   | 2B | AX.89470805 | 1.76E+07 | 0.25 | 2.63  | 3.05 | 0.03 |
| E1 | GY   | 2B | AX.89551300 | 7.93E+08 | 0.35 | -2.98 | 4.54 | 0.09 |
| E1 | GY   | 2B | AX.89486719 | 7.85E+08 | 0.10 | -3.90 | 3.28 | 0.05 |
| E1 | GY   | 2B | AX.89671402 | 1.01E+08 | 0.07 | -4.61 | 3.07 | 0.06 |
| E1 | GY   | 2B | AX.89676426 | 1.82E+08 | 0.13 | -4.30 | 4.67 | 0.09 |
| E1 | GY   | 2B | AX.89314257 | 1.43E+08 | 0.26 | -2.60 | 3.06 | 0.05 |
| E1 | GY   | 2B | AX.89674559 | 8.60E+06 | 0.35 | -2.48 | 3.29 | 0.05 |
| E1 | GY   | 2B | AX.89486719 | 7.85E+08 | 0.10 | -3.90 | 3.28 | 0.05 |
| E1 | GY   | 2B | AX.89590527 | 1.33E+08 | 0.07 | -4.72 | 3.38 | 0.05 |
| E1 | GY   | 2B | AX.89451061 | 1.04E+08 | 0.07 | -4.61 | 3.07 | 0.06 |
| E1 | GY   | 2B | AX.89327212 | 1.80E+08 | 0.20 | -3.07 | 3.45 | 0.06 |
| E1 | GY   | 2B | AX.89699216 | 1.82E+08 | 0.11 | -3.88 | 3.48 | 0.06 |
| E1 | GY   | 2B | AX.89715595 | 1.84E+08 | 0.09 | -4.30 | 3.47 | 0.06 |
| E1 | GY   | 2B | AX.89395850 | 1.84E+08 | 0.14 | -3.55 | 3.60 | 0.06 |
| E1 | GY   | 2B | AX.89671402 | 1.01E+08 | 0.07 | -4.61 | 3.07 | 0.06 |
| E1 | GY   | 2B | AX.89339086 | 1.41E+08 | 0.26 | -2.60 | 3.06 | 0.05 |
| E1 | GY   | 2B | AX.89407393 | 1.06E+08 | 0.08 | -5.36 | 4.87 | 0.08 |
| E1 | GY   | 2B | AX.89396407 | 1.04E+08 | 0.07 | -4.61 | 3.07 | 0.06 |
| E1 | GY   | 2B | AX.89327212 | 1.80E+08 | 0.20 | -3.07 | 3.45 | 0.06 |
| E1 | GY   | 2B | AX.89379675 | 1.03E+08 | 0.07 | -4.61 | 3.07 | 0.06 |
| E1 | GY   | 2B | AX.89727517 | 7.57E+08 | 0.06 | -5.01 | 3.13 | 0.05 |
| E1 | GY   | 2B | AX.89412544 | 1.84E+08 | 0.09 | -4.30 | 3.47 | 0.06 |
| E1 | GY   | 2B | AX.89412544 | 1.84E+08 | 0.09 | -4.30 | 3.47 | 0.06 |
| E1 | GY   | 2B | AX.89376677 | 1.82E+08 | 0.13 | -4.62 | 5.44 | 0.10 |
| E1 | GY   | 2B | AX.89686951 | 1.42E+08 | 0.26 | -2.60 | 3.06 | 0.05 |
| E1 | GY   | 2B | AX.89359515 | 5.94E+08 | 0.33 | 2.55  | 3.34 | 0.06 |
| E1 | GY   | 2B | AX.89490236 | 4.74E+04 | 0.27 | -2.52 | 3.01 | 0.04 |

|    |      |    |             |          |      |       |      |      |
|----|------|----|-------------|----------|------|-------|------|------|
| E1 | GY   | 2B | AX.89737804 | 1.79E+08 | 0.20 | -3.07 | 3.45 | 0.06 |
| E1 | GY   | 2B | AX.89335901 | 1.83E+08 | 0.14 | -4.13 | 4.69 | 0.09 |
| E1 | GY   | 2B | AX.89450884 | 5.95E+08 | 0.31 | 2.44  | 3.04 | 0.05 |
| E1 | GY   | 2B | AX.89460798 | 1.03E+08 | 0.07 | -4.61 | 3.07 | 0.06 |
| E1 | GY   | 2B | AX.89401624 | 4.53E+05 | 0.27 | -2.52 | 3.01 | 0.04 |
| E1 | GY   | 2B | AX.89588628 | 7.59E+08 | 0.06 | -4.77 | 3.07 | 0.05 |
| E1 | GY   | 2B | AX.89760340 | 7.65E+08 | 0.12 | -3.88 | 3.59 | 0.07 |
| E1 | GY   | 2B | AX.89511482 | 1.83E+08 | 0.13 | -3.70 | 3.69 | 0.07 |
| E1 | GY   | 2B | AX.89346022 | 1.70E+08 | 0.10 | 3.80  | 3.14 | 0.05 |
| E1 | GY   | 2B | AX.86169218 | 1.84E+08 | 0.09 | -4.30 | 3.47 | 0.06 |
| E1 | GY   | 2B | AX.89459157 | 1.81E+08 | 0.12 | -3.54 | 3.15 | 0.06 |
| E1 | GY   | 2B | AX.89459157 | 1.81E+08 | 0.12 | -3.54 | 3.15 | 0.06 |
| E1 | GY   | 2B | AX.89589315 | 7.59E+08 | 0.06 | -4.77 | 3.07 | 0.05 |
| E1 | SPM2 | 2B | AX.89575791 | 7.12E+08 | 0.20 | 23.05 | 3.83 | 0.07 |
| E1 | GY   | 2B | AX.89661546 | 5.94E+08 | 0.32 | 2.42  | 3.02 | 0.05 |
| E1 | GY   | 2B | AX.86170531 | 1.84E+08 | 0.09 | -4.30 | 3.47 | 0.06 |
| E1 | GY   | 2B | AX.89727377 | 5.94E+08 | 0.33 | 2.53  | 3.30 | 0.06 |
| E1 | GY   | 2B | AX.89496140 | 5.06E+05 | 0.27 | -2.52 | 3.01 | 0.04 |
| E1 | GY   | 2B | AX.89313148 | 7.85E+08 | 0.25 | -2.76 | 3.35 | 0.06 |
| E1 | GY   | 2B | AX.89654194 | 1.81E+08 | 0.11 | -3.88 | 3.48 | 0.06 |
| E1 | GY   | 2B | AX.89591171 | 1.83E+08 | 0.14 | -3.82 | 3.99 | 0.07 |
| E1 | GY   | 2B | AX.89663766 | 1.43E+08 | 0.25 | -2.76 | 3.36 | 0.06 |
| E1 | GY   | 2B | AX.89449676 | 1.84E+08 | 0.14 | -3.69 | 3.76 | 0.07 |
| E1 | GY   | 2B | AX.89686951 | 1.42E+08 | 0.26 | -2.60 | 3.06 | 0.05 |
| E1 | GY   | 2B | AX.89355285 | 1.83E+08 | 0.15 | -3.99 | 4.51 | 0.08 |
| E1 | GY   | 2B | AX.89662478 | 1.02E+08 | 0.07 | -4.61 | 3.07 | 0.06 |
| E1 | GY   | 2B | AX.89662478 | 1.02E+08 | 0.07 | -4.61 | 3.07 | 0.06 |
| E1 | GY   | 2B | AX.89558174 | 1.81E+08 | 0.12 | -4.25 | 4.19 | 0.08 |
| E1 | GY   | 2B | AX.89407393 | 1.06E+08 | 0.08 | -5.36 | 4.87 | 0.08 |
| E1 | GY   | 2B | AX.89541745 | 1.82E+08 | 0.14 | -3.82 | 3.99 | 0.07 |
| E1 | GY   | 2B | AX.89594592 | 1.80E+08 | 0.20 | -3.07 | 3.45 | 0.06 |
| E1 | GY   | 2B | AX.89318072 | 1.42E+08 | 0.26 | -2.60 | 3.06 | 0.05 |
| E1 | GY   | 2B | AX.89318072 | 1.42E+08 | 0.26 | -2.60 | 3.06 | 0.05 |
| E1 | GY   | 2B | AX.89715595 | 1.84E+08 | 0.09 | -4.30 | 3.47 | 0.06 |
| E1 | GY   | 2B | AX.89403225 | 1.03E+08 | 0.07 | -5.12 | 3.89 | 0.07 |
| E1 | SPM2 | 2B | AX.89360641 | 7.11E+08 | 0.23 | 22.08 | 3.85 | 0.07 |
| E1 | GY   | 2B | AX.89460798 | 1.03E+08 | 0.07 | -4.61 | 3.07 | 0.06 |
| E1 | GY   | 2B | AX.89673373 | 7.64E+08 | 0.12 | -3.88 | 3.59 | 0.07 |
| E1 | GY   | 2B | AX.89659140 | 7.93E+08 | 0.14 | -3.75 | 3.86 | 0.07 |
| E1 | GY   | 2B | AX.89450525 | 7.93E+08 | 0.34 | -2.79 | 4.01 | 0.08 |
| E1 | GY   | 2B | AX.89761668 | 5.94E+08 | 0.32 | 2.42  | 3.02 | 0.05 |
| E1 | GY   | 2B | AX.89470748 | 6.62E+08 | 0.06 | -5.81 | 4.32 | 0.07 |
| E1 | GY   | 2B | AX.89745248 | 1.82E+08 | 0.12 | -4.25 | 4.19 | 0.08 |
| E1 | SPM2 | 2B | AX.89659164 | 7.12E+08 | 0.20 | 23.05 | 3.83 | 0.07 |
| E1 | GY   | 2B | AX.89395850 | 1.84E+08 | 0.14 | -3.55 | 3.60 | 0.06 |
| E1 | GY   | 2B | AX.89454254 | 1.01E+08 | 0.07 | -4.61 | 3.07 | 0.06 |
| E1 | GY   | 2B | AX.89676426 | 1.82E+08 | 0.13 | -4.30 | 4.67 | 0.09 |
| E1 | GY   | 2B | AX.89396028 | 1.44E+08 | 0.25 | -2.59 | 3.01 | 0.05 |
| E1 | GY   | 2B | AX.89729590 | 1.83E+08 | 0.14 | -3.82 | 3.99 | 0.07 |
| E1 | GY   | 2B | AX.89590527 | 1.33E+08 | 0.07 | -4.72 | 3.38 | 0.05 |



|    |      |    |             |          |      |       |      |      |
|----|------|----|-------------|----------|------|-------|------|------|
| E1 | GY   | 2B | AX.89643712 | 1.44E+08 | 0.25 | -2.59 | 3.01 | 0.05 |
| E1 | GY   | 2B | AX.89349377 | 1.81E+08 | 0.12 | -4.25 | 4.19 | 0.08 |
| E1 | GY   | 2B | AX.89439937 | 7.85E+08 | 0.22 | -2.74 | 3.09 | 0.05 |
| E1 | GY   | 2B | AX.89734149 | 7.57E+08 | 0.06 | -4.77 | 3.07 | 0.05 |
| E1 | GY   | 2B | AX.89327702 | 1.84E+08 | 0.08 | -4.58 | 3.70 | 0.07 |
| E1 | GY   | 2B | AX.89444410 | 1.81E+08 | 0.12 | -3.46 | 3.03 | 0.05 |
| E1 | GY   | 2B | AX.89381154 | 7.57E+08 | 0.06 | -5.75 | 3.97 | 0.06 |
| E1 | GY   | 2B | AX.89644546 | 7.85E+08 | 0.24 | -2.80 | 3.32 | 0.06 |
| E1 | GY   | 2B | AX.89424631 | 7.52E+08 | 0.30 | -2.69 | 3.51 | 0.06 |
| E1 | GY   | 2B | AX.89628479 | 1.85E+08 | 0.09 | -4.30 | 3.47 | 0.06 |
| E1 | GY   | 2B | AX.89679164 | 1.03E+08 | 0.07 | -4.61 | 3.07 | 0.06 |
| E1 | GY   | 2B | AX.89385918 | 1.79E+08 | 0.20 | -3.07 | 3.45 | 0.06 |
| E1 | GY   | 2B | AX.89317506 | 1.03E+08 | 0.07 | -4.61 | 3.07 | 0.06 |
| E1 | GY   | 2B | AX.89317506 | 1.03E+08 | 0.07 | -4.61 | 3.07 | 0.06 |
| E1 | GY   | 2B | AX.89727517 | 7.57E+08 | 0.06 | -5.01 | 3.13 | 0.05 |
| E1 | GY   | 2B | AX.89384745 | 1.83E+08 | 0.14 | -3.82 | 3.99 | 0.07 |
| E1 | GY   | 2B | AX.89375220 | 1.84E+08 | 0.14 | -4.13 | 4.69 | 0.09 |
| E1 | GY   | 2B | AX.89720671 | 1.79E+08 | 0.20 | -3.07 | 3.45 | 0.06 |
| E1 | GY   | 2B | AX.89720671 | 1.79E+08 | 0.20 | -3.07 | 3.45 | 0.06 |
| E1 | GY   | 2B | AX.89463795 | 5.94E+08 | 0.33 | 2.53  | 3.30 | 0.06 |
| E1 | GY   | 2B | AX.89379675 | 1.03E+08 | 0.07 | -4.61 | 3.07 | 0.06 |
| E1 | GY   | 2B | AX.89400251 | 7.59E+08 | 0.06 | -4.77 | 3.07 | 0.05 |
| E1 | GY   | 2B | AX.89563399 | 1.84E+08 | 0.14 | -3.82 | 3.99 | 0.07 |
| E1 | GY   | 2B | AX.89454067 | 1.82E+08 | 0.13 | -4.62 | 5.44 | 0.10 |
| E1 | GY   | 2B | AX.89326616 | 1.02E+08 | 0.07 | -4.61 | 3.07 | 0.06 |
| E1 | GY   | 2B | AX.89551300 | 7.93E+08 | 0.35 | -2.98 | 4.54 | 0.09 |
| E1 | GY   | 2B | AX.89396028 | 1.44E+08 | 0.25 | -2.59 | 3.01 | 0.05 |
| E1 | GY   | 2B | AX.89635417 | 1.81E+08 | 0.12 | -4.25 | 4.19 | 0.08 |
| E1 | GY   | 2B | AX.89518028 | 1.81E+08 | 0.12 | -4.25 | 4.19 | 0.08 |
| E1 | GY   | 2B | AX.89518028 | 1.81E+08 | 0.12 | -4.25 | 4.19 | 0.08 |
| E1 | SPM2 | 2B | AX.89483671 | 7.12E+08 | 0.20 | 23.05 | 3.83 | 0.07 |
| E1 | GY   | 2B | AX.89647344 | 7.59E+08 | 0.06 | -4.77 | 3.07 | 0.05 |
| E1 | GY   | 2B | AX.89465592 | 4.53E+05 | 0.27 | -2.54 | 3.04 | 0.04 |
| E1 | GY   | 2B | AX.89469521 | 1.83E+08 | 0.14 | -4.13 | 4.69 | 0.09 |
| E1 | GY   | 2B | AX.89600434 | 1.84E+08 | 0.09 | -4.19 | 3.45 | 0.06 |
| E1 | GY   | 2B | AX.89396407 | 1.04E+08 | 0.07 | -4.61 | 3.07 | 0.06 |
| E1 | GY   | 2B | AX.89562902 | 1.84E+08 | 0.09 | -4.30 | 3.47 | 0.06 |
| E1 | GY   | 2B | AX.89351791 | 1.83E+08 | 0.14 | -3.82 | 3.99 | 0.07 |
| E1 | GY   | 2B | AX.89643712 | 1.44E+08 | 0.25 | -2.59 | 3.01 | 0.05 |
| E1 | GY   | 2B | AX.86167754 | 1.28E+08 | 0.06 | -6.36 | 5.07 | 0.08 |
| E1 | GY   | 2B | AX.89722560 | 1.84E+08 | 0.14 | -3.82 | 3.99 | 0.07 |
| E1 | GY   | 2B | AX.89436492 | 7.93E+08 | 0.35 | -2.98 | 4.54 | 0.09 |
| E1 | GY   | 2B | AX.89466177 | 7.95E+08 | 0.41 | -2.34 | 3.12 | 0.05 |
| E1 | GY   | 2B | AX.89458271 | 5.94E+08 | 0.32 | 2.55  | 3.32 | 0.06 |
| E1 | GY   | 2B | AX.89327702 | 1.84E+08 | 0.08 | -4.58 | 3.70 | 0.07 |
| E1 | GY   | 2B | AX.89384745 | 1.83E+08 | 0.14 | -3.82 | 3.99 | 0.07 |
| E1 | GY   | 2B | AX.89599952 | 7.93E+08 | 0.34 | -2.90 | 4.26 | 0.08 |
| E1 | GY   | 2B | AX.89572385 | 7.85E+08 | 0.25 | -2.76 | 3.35 | 0.06 |
| E1 | GY   | 2B | AX.86169220 | 1.84E+08 | 0.09 | -4.30 | 3.47 | 0.06 |
| E1 | GY   | 2B | AX.89734860 | 1.81E+08 | 0.11 | -3.88 | 3.48 | 0.06 |

|    |    |    |             |          |      |       |      |      |
|----|----|----|-------------|----------|------|-------|------|------|
| E1 | GY | 2B | AX.89549450 | 1.00E+08 | 0.07 | -4.61 | 3.07 | 0.06 |
| E1 | GY | 2B | AX.89538158 | 9.00E+06 | 0.27 | -2.52 | 3.01 | 0.04 |
| E1 | GY | 2B | AX.86170531 | 1.84E+08 | 0.09 | -4.30 | 3.47 | 0.06 |
| E1 | GY | 2B | AX.89605804 | 1.82E+08 | 0.14 | -4.23 | 4.88 | 0.09 |
| E1 | GY | 2B | AX.89674559 | 8.60E+06 | 0.35 | -2.48 | 3.29 | 0.05 |
| E1 | GY | 2B | AX.89565875 | 1.03E+08 | 0.07 | -4.61 | 3.07 | 0.06 |
| E1 | GY | 2B | AX.89589720 | 1.02E+08 | 0.07 | -5.12 | 3.89 | 0.07 |
| E1 | GY | 2B | AX.89456255 | 4.60E+04 | 0.27 | -2.52 | 3.01 | 0.04 |
| E1 | GY | 2B | AX.89332441 | 1.83E+08 | 0.14 | -4.13 | 4.69 | 0.09 |
| E1 | GY | 2B | AX.89602560 | 1.84E+08 | 0.09 | -4.30 | 3.47 | 0.06 |
| E1 | GY | 2B | AX.89602560 | 1.84E+08 | 0.09 | -4.30 | 3.47 | 0.06 |
| E1 | GY | 2B | AX.89472547 | 1.42E+08 | 0.26 | -2.60 | 3.06 | 0.05 |
| E1 | GY | 2B | AX.89614104 | 6.59E+08 | 0.06 | -5.29 | 3.43 | 0.05 |
| E1 | GY | 2B | AX.89760737 | 7.63E+08 | 0.24 | -2.69 | 3.15 | 0.05 |
| E1 | GY | 2B | AX.89562902 | 1.84E+08 | 0.09 | -4.30 | 3.47 | 0.06 |
| E1 | GY | 2B | AX.89732643 | 1.01E+08 | 0.07 | -4.61 | 3.07 | 0.06 |
| E1 | GY | 2B | AX.89732643 | 1.01E+08 | 0.07 | -4.61 | 3.07 | 0.06 |
| E1 | GY | 2B | AX.89543258 | 1.47E+08 | 0.25 | -2.63 | 3.09 | 0.05 |
| E1 | GY | 2B | AX.89614451 | 1.83E+08 | 0.14 | -3.82 | 3.99 | 0.07 |
| E1 | GY | 2B | AX.89534791 | 1.02E+08 | 0.07 | -5.12 | 3.89 | 0.07 |
| E1 | GY | 2B | AX.89423320 | 7.52E+08 | 0.29 | -2.81 | 3.75 | 0.07 |
| E1 | GY | 2B | AX.89761668 | 5.94E+08 | 0.32 | 2.42  | 3.02 | 0.05 |
| E1 | GY | 2B | AX.89599952 | 7.93E+08 | 0.34 | -2.90 | 4.26 | 0.08 |
| E1 | GY | 2B | AX.89713274 | 7.75E+08 | 0.08 | -5.32 | 4.81 | 0.09 |
| E1 | GY | 2B | AX.89543659 | 7.85E+08 | 0.24 | -3.19 | 4.17 | 0.07 |
| E1 | GY | 2B | AX.89404329 | 9.74E+06 | 0.27 | -2.52 | 3.01 | 0.04 |
| E1 | GY | 2B | AX.89600434 | 1.84E+08 | 0.09 | -4.19 | 3.45 | 0.06 |
| E1 | GY | 2B | AX.89351791 | 1.83E+08 | 0.14 | -3.82 | 3.99 | 0.07 |
| E1 | GY | 2B | AX.89722560 | 1.84E+08 | 0.14 | -3.82 | 3.99 | 0.07 |
| E1 | GY | 2B | AX.89556126 | 7.90E+08 | 0.27 | -2.69 | 3.36 | 0.07 |
| E1 | GY | 2B | AX.89436572 | 1.82E+08 | 0.13 | -4.30 | 4.67 | 0.09 |
| E1 | GY | 2B | AX.89330831 | 5.95E+08 | 0.33 | 2.53  | 3.30 | 0.06 |
| E1 | GY | 2B | AX.89726427 | 7.93E+08 | 0.35 | -2.98 | 4.54 | 0.09 |
| E1 | GY | 2B | AX.89673373 | 7.64E+08 | 0.12 | -3.88 | 3.59 | 0.07 |
| E1 | GY | 2B | AX.89619964 | 1.78E+08 | 0.20 | -3.07 | 3.45 | 0.06 |
| E1 | GY | 2B | AX.89552651 | 1.81E+08 | 0.12 | -4.25 | 4.19 | 0.08 |
| E1 | GY | 2B | AX.89370035 | 9.11E+06 | 0.23 | -3.62 | 5.15 | 0.09 |
| E1 | GY | 2B | AX.89673819 | 9.13E+06 | 0.45 | -2.37 | 3.26 | 0.06 |
| E1 | GY | 2B | AX.89424631 | 7.52E+08 | 0.30 | -2.69 | 3.51 | 0.06 |
| E1 | GY | 2B | AX.89523462 | 1.84E+08 | 0.13 | -3.81 | 3.77 | 0.07 |
| E1 | GY | 2B | AX.89698976 | 7.57E+08 | 0.06 | -5.01 | 3.13 | 0.05 |
| E1 | GY | 2B | AX.89739171 | 7.95E+08 | 0.41 | -2.41 | 3.30 | 0.05 |
| E1 | GY | 2B | AX.89657904 | 1.41E+08 | 0.26 | -2.60 | 3.06 | 0.05 |
| E1 | GY | 2B | AX.89545829 | 5.94E+08 | 0.33 | 2.53  | 3.30 | 0.06 |
| E1 | GY | 2B | AX.89545829 | 5.94E+08 | 0.33 | 2.53  | 3.30 | 0.06 |
| E1 | GY | 2B | AX.89452576 | 3.18E+05 | 0.27 | -2.52 | 3.01 | 0.04 |
| E1 | GY | 2B | AX.89686633 | 5.94E+08 | 0.32 | 2.55  | 3.32 | 0.06 |
| E1 | GY | 2B | AX.89654194 | 1.81E+08 | 0.11 | -3.88 | 3.48 | 0.06 |
| E1 | GY | 2B | AX.89332143 | 1.82E+08 | 0.13 | -4.62 | 5.44 | 0.10 |
| E1 | GY | 2B | AX.89325475 | 1.81E+08 | 0.12 | -4.25 | 4.19 | 0.08 |

|    |      |    |             |          |      |        |      |      |
|----|------|----|-------------|----------|------|--------|------|------|
| E1 | GY   | 2B | AX.89513011 | 9.12E+06 | 0.40 | -2.46  | 3.39 | 0.07 |
| E1 | GY   | 2B | AX.89325940 | 1.83E+08 | 0.14 | -3.82  | 3.99 | 0.07 |
| E1 | GY   | 2B | AX.89335901 | 1.83E+08 | 0.14 | -4.13  | 4.69 | 0.09 |
| E1 | GY   | 2B | AX.89463795 | 5.94E+08 | 0.33 | 2.53   | 3.30 | 0.06 |
| E1 | GY   | 2B | AX.89326280 | 1.80E+08 | 0.20 | -3.07  | 3.45 | 0.06 |
| E1 | GY   | 2B | AX.89525251 | 7.57E+08 | 0.06 | -4.77  | 3.07 | 0.05 |
| E1 | GY   | 2B | AX.89403432 | 1.79E+07 | 0.24 | 2.84   | 3.40 | 0.04 |
| E1 | GY   | 2B | AX.89360195 | 7.59E+08 | 0.06 | -4.77  | 3.07 | 0.05 |
| E1 | GY   | 2B | AX.89563399 | 1.84E+08 | 0.14 | -3.82  | 3.99 | 0.07 |
| E1 | GY   | 2B | AX.89603789 | 1.03E+08 | 0.07 | -4.61  | 3.07 | 0.06 |
| E1 | GY   | 2B | AX.89630862 | 1.84E+08 | 0.14 | -4.13  | 4.69 | 0.09 |
| E1 | GY   | 2B | AX.89729590 | 1.83E+08 | 0.14 | -3.82  | 3.99 | 0.07 |
| E1 | GY   | 2B | AX.89664208 | 6.61E+08 | 0.06 | -5.29  | 3.43 | 0.05 |
| E1 | GY   | 2B | AX.89408490 | 1.83E+08 | 0.14 | -4.29  | 4.89 | 0.09 |
| E1 | GY   | 2B | AX.89443676 | 7.58E+08 | 0.06 | -4.77  | 3.07 | 0.05 |
| E1 | GY   | 2B | AX.89713743 | 1.84E+08 | 0.14 | -3.82  | 3.99 | 0.07 |
| E1 | GY   | 2B | AX.89741917 | 1.44E+08 | 0.25 | -2.59  | 3.01 | 0.05 |
| E1 | GY   | 2B | AX.89349377 | 1.81E+08 | 0.12 | -4.25  | 4.19 | 0.08 |
| E1 | GY   | 2B | AX.89436492 | 7.93E+08 | 0.35 | -2.98  | 4.54 | 0.09 |
| E1 | GY   | 2B | AX.89396912 | 1.02E+08 | 0.07 | -5.12  | 3.89 | 0.07 |
| E1 | GY   | 2B | AX.89749678 | 6.59E+08 | 0.06 | -5.29  | 3.43 | 0.05 |
| E1 | GY   | 2B | AX.89494869 | 5.94E+08 | 0.33 | 2.53   | 3.30 | 0.06 |
| E1 | GY   | 2B | AX.89494869 | 5.94E+08 | 0.33 | 2.53   | 3.30 | 0.06 |
| E1 | SPM2 | 2B | AX.89343204 | 6.90E+08 | 0.20 | -20.75 | 3.14 | 0.06 |
| E1 | GY   | 2B | AX.89771483 | 7.57E+08 | 0.06 | -4.77  | 3.07 | 0.05 |
| E1 | GY   | 2B | AX.89327795 | 1.39E+08 | 0.08 | -5.46  | 4.81 | 0.09 |
| E1 | GY   | 2B | AX.89338392 | 7.90E+08 | 0.12 | -4.31  | 4.43 | 0.08 |
| E1 | GY   | 2B | AX.89644546 | 7.85E+08 | 0.24 | -2.80  | 3.32 | 0.06 |
| E1 | GY   | 2B | AX.89327830 | 7.59E+08 | 0.06 | -4.77  | 3.07 | 0.05 |
| E1 | GY   | 2B | AX.89491567 | 1.84E+08 | 0.14 | -3.82  | 3.99 | 0.07 |
| E1 | GY   | 2B | AX.89451935 | 1.79E+07 | 0.24 | 2.74   | 3.24 | 0.04 |
| E1 | SPM2 | 2B | AX.89618976 | 7.12E+08 | 0.20 | 23.05  | 3.83 | 0.07 |
| E1 | GY   | 2B | AX.89750183 | 5.63E+08 | 0.18 | -3.03  | 3.22 | 0.05 |
| E1 | GY   | 2B | AX.89410146 | 1.84E+08 | 0.14 | -4.13  | 4.69 | 0.09 |
| E1 | GY   | 2B | AX.89405839 | 1.81E+08 | 0.12 | -4.25  | 4.19 | 0.08 |
| E1 | GY   | 2B | AX.89480571 | 1.83E+08 | 0.14 | -3.82  | 3.99 | 0.07 |
| E1 | GY   | 2B | AX.89463396 | 1.84E+08 | 0.12 | -4.28  | 4.38 | 0.08 |
| E1 | GY   | 2B | AX.89317632 | 7.64E+08 | 0.14 | -3.30  | 3.10 | 0.06 |
| E1 | GY   | 2B | AX.89456255 | 4.60E+04 | 0.27 | -2.52  | 3.01 | 0.04 |
| E1 | GY   | 2B | AX.89375220 | 1.84E+08 | 0.14 | -4.13  | 4.69 | 0.09 |
| E1 | SPM2 | 2B | AX.89648863 | 7.12E+08 | 0.20 | 23.05  | 3.83 | 0.07 |
| E1 | GY   | 2B | AX.89562158 | 6.60E+08 | 0.06 | -5.29  | 3.43 | 0.05 |
| E1 | GY   | 2B | AX.89445883 | 1.83E+08 | 0.14 | -3.82  | 3.99 | 0.07 |
| E1 | GY   | 2B | AX.89399328 | 1.83E+08 | 0.14 | -3.82  | 3.99 | 0.07 |
| E1 | GY   | 2B | AX.89539161 | 1.82E+08 | 0.13 | -4.62  | 5.44 | 0.10 |
| E1 | GY   | 2B | AX.89682796 | 1.84E+08 | 0.09 | -4.72  | 4.24 | 0.08 |
| E1 | GY   | 2B | AX.89326280 | 1.80E+08 | 0.20 | -3.07  | 3.45 | 0.06 |
| E1 | GY   | 2B | AX.89400073 | 7.53E+08 | 0.29 | -2.61  | 3.29 | 0.06 |
| E1 | GY   | 2B | AX.89525251 | 7.57E+08 | 0.06 | -4.77  | 3.07 | 0.05 |
| E1 | GY   | 2B | AX.89329130 | 1.80E+07 | 0.24 | 2.84   | 3.40 | 0.04 |

|    |      |    |             |          |      |       |      |      |
|----|------|----|-------------|----------|------|-------|------|------|
| E1 | GY   | 2B | AX.89493461 | 1.83E+08 | 0.14 | -4.13 | 4.69 | 0.09 |
| E1 | GY   | 2B | AX.89658972 | 1.80E+08 | 0.20 | -3.07 | 3.45 | 0.06 |
| E1 | GY   | 2B | AX.89591171 | 1.83E+08 | 0.14 | -3.82 | 3.99 | 0.07 |
| E1 | GY   | 2B | AX.89387913 | 1.47E+08 | 0.20 | -2.92 | 3.17 | 0.05 |
| E1 | GY   | 2B | AX.89447263 | 5.15E+05 | 0.27 | -2.52 | 3.01 | 0.04 |
| E1 | GY   | 2B | AX.89505960 | 7.46E+08 | 0.35 | -2.35 | 3.01 | 0.05 |
| E1 | GY   | 2B | AX.89647582 | 1.29E+08 | 0.06 | -6.36 | 5.07 | 0.08 |
| E1 | GY   | 2B | AX.86167517 | 7.89E+08 | 0.09 | -4.11 | 3.20 | 0.05 |
| E1 | GY   | 2B | AX.86167517 | 7.89E+08 | 0.09 | -4.11 | 3.20 | 0.05 |
| E1 | GY   | 2B | AX.89377106 | 1.01E+08 | 0.07 | -4.61 | 3.07 | 0.06 |
| E1 | GY   | 2B | AX.86167754 | 1.28E+08 | 0.06 | -6.36 | 5.07 | 0.08 |
| E1 | GY   | 2B | AX.89770787 | 1.43E+08 | 0.26 | -2.73 | 3.32 | 0.06 |
| E1 | GY   | 2B | AX.89537259 | 1.01E+08 | 0.07 | -4.61 | 3.07 | 0.06 |
| E1 | GY   | 2B | AX.89470748 | 6.62E+08 | 0.06 | -5.81 | 4.32 | 0.07 |
| E1 | GY   | 2B | AX.89588628 | 7.59E+08 | 0.06 | -4.77 | 3.07 | 0.05 |
| E1 | GY   | 2B | AX.89612574 | 1.85E+08 | 0.09 | -4.30 | 3.47 | 0.06 |
| E1 | GY   | 2B | AX.89589315 | 7.59E+08 | 0.06 | -4.77 | 3.07 | 0.05 |
| E1 | GY   | 2B | AX.89342802 | 1.82E+08 | 0.12 | -4.25 | 4.19 | 0.08 |
| E1 | GY   | 2B | AX.89342802 | 1.82E+08 | 0.12 | -4.25 | 4.19 | 0.08 |
| E1 | GY   | 2B | AX.89699216 | 1.82E+08 | 0.11 | -3.88 | 3.48 | 0.06 |
| E1 | GY   | 2B | AX.89542229 | 1.02E+08 | 0.07 | -4.61 | 3.07 | 0.06 |
| E1 | GY   | 2B | AX.89719172 | 3.65E+05 | 0.27 | -2.52 | 3.01 | 0.04 |
| E1 | GY   | 2B | AX.89472547 | 1.42E+08 | 0.26 | -2.60 | 3.06 | 0.05 |
| E1 | GY   | 2B | AX.89736400 | 1.82E+08 | 0.13 | -4.30 | 4.67 | 0.09 |
| E1 | GY   | 2B | AX.89504410 | 1.83E+08 | 0.14 | -3.82 | 3.99 | 0.07 |
| E1 | GY   | 2B | AX.89332789 | 1.80E+08 | 0.20 | -3.07 | 3.45 | 0.06 |
| E1 | GY   | 2B | AX.89602946 | 1.02E+08 | 0.07 | -4.61 | 3.07 | 0.06 |
| E1 | GY   | 2B | AX.89460581 | 1.43E+08 | 0.25 | -2.76 | 3.31 | 0.06 |
| E1 | GY   | 2B | AX.89731365 | 1.41E+08 | 0.26 | -2.60 | 3.06 | 0.05 |
| E1 | SPM2 | 2B | AX.89523019 | 7.12E+08 | 0.21 | 24.96 | 4.47 | 0.08 |
| E1 | GY   | 2B | AX.89493461 | 1.83E+08 | 0.14 | -4.13 | 4.69 | 0.09 |
| E1 | GY   | 2B | AX.86164438 | 7.85E+08 | 0.22 | -2.74 | 3.09 | 0.05 |
| E1 | GY   | 2B | AX.89450525 | 7.93E+08 | 0.34 | -2.79 | 4.01 | 0.08 |
| E1 | GY   | 2B | AX.89581448 | 1.01E+08 | 0.07 | -5.12 | 3.89 | 0.07 |
| E1 | GY   | 2B | AX.89416037 | 1.83E+08 | 0.14 | -4.13 | 4.69 | 0.09 |
| E1 | GY   | 2B | AX.89416037 | 1.83E+08 | 0.14 | -4.13 | 4.69 | 0.09 |
| E1 | GY   | 2B | AX.89688716 | 7.93E+08 | 0.17 | -3.41 | 3.81 | 0.07 |
| E1 | GY   | 2B | AX.89737804 | 1.79E+08 | 0.20 | -3.07 | 3.45 | 0.06 |
| E1 | GY   | 2B | AX.89451061 | 1.04E+08 | 0.07 | -4.61 | 3.07 | 0.06 |
| E1 | GY   | 2B | AX.89770628 | 7.77E+08 | 0.49 | -2.39 | 3.34 | 0.05 |
| E1 | GY   | 2B | AX.89323675 | 6.59E+08 | 0.06 | -5.29 | 3.43 | 0.05 |
| E1 | GY   | 2B | AX.89689244 | 8.00E+08 | 0.08 | -4.70 | 3.71 | 0.06 |
| E1 | GY   | 2B | AX.89474590 | 1.82E+08 | 0.12 | -4.25 | 4.19 | 0.08 |
| E1 | GY   | 2B | AX.89369630 | 1.46E+08 | 0.22 | -2.73 | 3.03 | 0.05 |
| E1 | GY   | 2B | AX.89439937 | 7.85E+08 | 0.22 | -2.74 | 3.09 | 0.05 |
| E1 | GY   | 2B | AX.89616056 | 5.94E+08 | 0.32 | 2.55  | 3.32 | 0.06 |
| E1 | GY   | 2B | AX.89734127 | 7.59E+08 | 0.05 | -6.10 | 4.09 | 0.07 |
| E1 | GY   | 2B | AX.89436572 | 1.82E+08 | 0.13 | -4.30 | 4.67 | 0.09 |
| E1 | GY   | 2B | AX.89725266 | 1.83E+08 | 0.14 | -3.82 | 3.99 | 0.07 |
| E1 | GY   | 2B | AX.89487985 | 1.83E+08 | 0.14 | -3.82 | 3.99 | 0.07 |

|    |      |    |             |          |      |       |      |      |
|----|------|----|-------------|----------|------|-------|------|------|
| E1 | GY   | 2B | AX.89585973 | 6.15E+08 | 0.33 | 2.49  | 3.22 | 0.06 |
| E1 | GY   | 2B | AX.86169220 | 1.84E+08 | 0.09 | -4.30 | 3.47 | 0.06 |
| E1 | GY   | 2B | AX.89690045 | 1.82E+08 | 0.13 | -4.62 | 5.44 | 0.10 |
| E1 | GY   | 2B | AX.89593250 | 1.81E+08 | 0.12 | -4.25 | 4.19 | 0.08 |
| E1 | GY   | 2B | AX.89405839 | 1.81E+08 | 0.12 | -4.25 | 4.19 | 0.08 |
| E1 | GY   | 2B | AX.89381365 | 1.43E+08 | 0.25 | -2.76 | 3.31 | 0.06 |
| E1 | GY   | 2B | AX.89381365 | 1.43E+08 | 0.25 | -2.76 | 3.31 | 0.06 |
| E1 | GY   | 2B | AX.89628479 | 1.85E+08 | 0.09 | -4.30 | 3.47 | 0.06 |
| E1 | GY   | 2B | AX.89709245 | 1.29E+08 | 0.06 | -6.36 | 5.07 | 0.08 |
| E1 | GY   | 2B | AX.89575510 | 1.34E+08 | 0.06 | -6.36 | 5.07 | 0.08 |
| E1 | GY   | 2B | AX.89313148 | 7.85E+08 | 0.25 | -2.76 | 3.35 | 0.06 |
| E1 | GY   | 2B | AX.89325475 | 1.81E+08 | 0.12 | -4.25 | 4.19 | 0.08 |
| E1 | GY   | 2B | AX.89666887 | 1.30E+08 | 0.07 | -6.79 | 6.05 | 0.10 |
| E1 | GY   | 2B | AX.89325940 | 1.83E+08 | 0.14 | -3.82 | 3.99 | 0.07 |
| E1 | GY   | 2B | AX.89569931 | 6.62E+08 | 0.06 | -5.81 | 4.32 | 0.07 |
| E1 | SPM2 | 2B | AX.89578062 | 7.12E+08 | 0.20 | 23.05 | 3.83 | 0.07 |
| E1 | GY   | 2B | AX.89679164 | 1.03E+08 | 0.07 | -4.61 | 3.07 | 0.06 |
| E1 | GY   | 2B | AX.89359988 | 1.78E+08 | 0.20 | -3.07 | 3.45 | 0.06 |
| E1 | GY   | 2B | AX.89464649 | 1.84E+08 | 0.14 | -3.55 | 3.60 | 0.06 |
| E1 | GY   | 2B | AX.89655408 | 1.01E+08 | 0.07 | -4.61 | 3.07 | 0.06 |
| E1 | GY   | 2B | AX.89765862 | 6.60E+08 | 0.06 | -5.29 | 3.43 | 0.05 |
| E1 | GY   | 2B | AX.89490236 | 4.74E+04 | 0.27 | -2.52 | 3.01 | 0.04 |
| E1 | GY   | 2B | AX.89326616 | 1.02E+08 | 0.07 | -4.61 | 3.07 | 0.06 |
| E1 | GY   | 2B | AX.89692891 | 1.02E+08 | 0.07 | -4.61 | 3.07 | 0.06 |
| E1 | GY   | 2B | AX.89692891 | 1.02E+08 | 0.07 | -4.61 | 3.07 | 0.06 |
| E1 | GY   | 2B | AX.89679762 | 1.43E+08 | 0.25 | -2.76 | 3.31 | 0.06 |
| E1 | GY   | 2B | AX.89408291 | 1.40E+08 | 0.13 | -3.50 | 3.18 | 0.06 |
| E1 | GY   | 2B | AX.89323244 | 1.83E+08 | 0.14 | -4.13 | 4.69 | 0.09 |
| E1 | GY   | 2B | AX.89761980 | 7.94E+08 | 0.11 | -4.21 | 3.87 | 0.07 |
| E1 | GY   | 2B | AX.89408490 | 1.83E+08 | 0.14 | -4.29 | 4.89 | 0.09 |
| E1 | GY   | 2B | AX.89626799 | 1.82E+08 | 0.11 | -3.88 | 3.48 | 0.06 |
| E1 | GY   | 2B | AX.89465592 | 4.53E+05 | 0.27 | -2.54 | 3.04 | 0.04 |
| E1 | GY   | 2B | AX.89526250 | 1.01E+08 | 0.07 | -4.61 | 3.07 | 0.06 |
| E1 | GY   | 2B | AX.89668347 | 7.64E+08 | 0.12 | -3.88 | 3.59 | 0.07 |
| E1 | GY   | 2B | AX.89373025 | 1.41E+08 | 0.26 | -2.60 | 3.06 | 0.05 |
| E1 | GY   | 2B | AX.89373025 | 1.41E+08 | 0.26 | -2.60 | 3.06 | 0.05 |
| E1 | GY   | 2B | AX.89461833 | 6.59E+08 | 0.06 | -5.29 | 3.43 | 0.05 |
| E1 | GY   | 2B | AX.89644113 | 1.84E+08 | 0.12 | -4.27 | 4.24 | 0.08 |
| E1 | GY   | 2B | AX.89596143 | 1.02E+08 | 0.07 | -4.61 | 3.07 | 0.06 |
| E1 | GY   | 2B | AX.89742669 | 7.57E+08 | 0.06 | -5.01 | 3.13 | 0.05 |
| E1 | GY   | 2B | AX.89742669 | 7.57E+08 | 0.06 | -5.01 | 3.13 | 0.05 |
| E1 | GY   | 2B | AX.89440441 | 1.31E+08 | 0.06 | -5.75 | 4.24 | 0.07 |
| E1 | GY   | 2B | AX.89444410 | 1.81E+08 | 0.12 | -3.46 | 3.03 | 0.05 |
| E1 | GY   | 2B | AX.89572385 | 7.85E+08 | 0.25 | -2.76 | 3.35 | 0.06 |
| E1 | GY   | 2B | AX.89694199 | 1.40E+08 | 0.24 | -2.80 | 3.35 | 0.06 |
| E1 | GY   | 2B | AX.89694199 | 1.40E+08 | 0.24 | -2.80 | 3.35 | 0.06 |
| E1 | GY   | 2B | AX.89549378 | 1.47E+08 | 0.20 | -2.92 | 3.17 | 0.05 |
| E1 | GY   | 2B | AX.89549450 | 1.00E+08 | 0.07 | -4.61 | 3.07 | 0.06 |
| E1 | GY   | 2B | AX.89463274 | 6.59E+08 | 0.06 | -5.29 | 3.43 | 0.05 |
| E1 | GY   | 2B | AX.89463274 | 6.59E+08 | 0.06 | -5.29 | 3.43 | 0.05 |

|    |    |    |             |          |      |       |      |      |
|----|----|----|-------------|----------|------|-------|------|------|
| E1 | GY | 2B | AX.89385918 | 1.79E+08 | 0.20 | -3.07 | 3.45 | 0.06 |
| E1 | GY | 2B | AX.89463396 | 1.84E+08 | 0.12 | -4.28 | 4.38 | 0.08 |
| E1 | GY | 2B | AX.89351218 | 6.59E+08 | 0.06 | -5.81 | 4.32 | 0.07 |
| E1 | GY | 2B | AX.89317632 | 7.64E+08 | 0.14 | -3.30 | 3.10 | 0.06 |
| E1 | GY | 2B | AX.89562233 | 7.64E+08 | 0.12 | -3.88 | 3.59 | 0.07 |
| E1 | GY | 2B | AX.89562233 | 7.64E+08 | 0.12 | -3.88 | 3.59 | 0.07 |
| E1 | GY | 2B | AX.89445890 | 1.79E+08 | 0.20 | -2.86 | 3.10 | 0.05 |
| E1 | GY | 2B | AX.89539161 | 1.82E+08 | 0.13 | -4.62 | 5.44 | 0.10 |
| E1 | GY | 2B | AX.89351692 | 7.52E+08 | 0.29 | -2.84 | 3.82 | 0.07 |
| E1 | GY | 2B | AX.89411485 | 4.88E+04 | 0.27 | -2.52 | 3.01 | 0.04 |
| E1 | GY | 2B | AX.89351692 | 7.52E+08 | 0.29 | -2.84 | 3.82 | 0.07 |
| E1 | GY | 2B | AX.89411485 | 4.88E+04 | 0.27 | -2.52 | 3.01 | 0.04 |
| E1 | GY | 2B | AX.89528928 | 3.65E+05 | 0.27 | -2.52 | 3.01 | 0.04 |
| E1 | GY | 2B | AX.89375686 | 6.61E+08 | 0.06 | -5.29 | 3.43 | 0.05 |
| E1 | GY | 2B | AX.89496808 | 4.39E+04 | 0.27 | -2.52 | 3.01 | 0.04 |
| E1 | GY | 2B | AX.89329130 | 1.80E+07 | 0.24 | 2.84  | 3.40 | 0.04 |
| E1 | GY | 2B | AX.89687896 | 1.02E+08 | 0.07 | -4.61 | 3.07 | 0.06 |
| E1 | GY | 2B | AX.89658972 | 1.80E+08 | 0.20 | -3.07 | 3.45 | 0.06 |
| E1 | GY | 2B | AX.89423116 | 5.95E+08 | 0.33 | 2.53  | 3.30 | 0.06 |
| E1 | GY | 2B | AX.89400251 | 7.59E+08 | 0.06 | -4.77 | 3.07 | 0.05 |
| E1 | GY | 2B | AX.89423320 | 7.52E+08 | 0.29 | -2.81 | 3.75 | 0.07 |
| E1 | GY | 2B | AX.89529518 | 5.94E+08 | 0.32 | 2.55  | 3.32 | 0.06 |
| E1 | GY | 2B | AX.89574794 | 1.02E+08 | 0.07 | -4.61 | 3.07 | 0.06 |
| E1 | GY | 2B | AX.89483240 | 7.95E+08 | 0.41 | -2.41 | 3.30 | 0.05 |
| E1 | GY | 2B | AX.89635417 | 1.81E+08 | 0.12 | -4.25 | 4.19 | 0.08 |
| E1 | GY | 2B | AX.89494298 | 7.60E+08 | 0.06 | -4.77 | 3.07 | 0.05 |
| E1 | GY | 2B | AX.89387913 | 1.47E+08 | 0.20 | -2.92 | 3.17 | 0.05 |
| E1 | GY | 2B | AX.89650120 | 1.78E+08 | 0.20 | -3.07 | 3.45 | 0.06 |
| E1 | GY | 2B | AX.89536672 | 7.85E+08 | 0.22 | -2.74 | 3.09 | 0.05 |
| E1 | GY | 2B | AX.89536672 | 7.85E+08 | 0.22 | -2.74 | 3.09 | 0.05 |
| E1 | GY | 2B | AX.89413015 | 6.59E+08 | 0.06 | -5.29 | 3.43 | 0.05 |
| E1 | GY | 2B | AX.89770787 | 1.43E+08 | 0.26 | -2.73 | 3.32 | 0.06 |
| E1 | GY | 2B | AX.89552327 | 1.78E+08 | 0.20 | -3.07 | 3.45 | 0.06 |
| E1 | GY | 2B | AX.89341825 | 1.02E+08 | 0.07 | -5.12 | 3.89 | 0.07 |
| E1 | GY | 2B | AX.89341825 | 1.02E+08 | 0.07 | -5.12 | 3.89 | 0.07 |
| E1 | GY | 2B | AX.89537014 | 7.93E+08 | 0.27 | -2.56 | 3.03 | 0.05 |
| E1 | GY | 2B | AX.89458271 | 5.94E+08 | 0.32 | 2.55  | 3.32 | 0.06 |
| E1 | GY | 2B | AX.89717315 | 1.79E+08 | 0.20 | -2.86 | 3.10 | 0.05 |
| E1 | GY | 2B | AX.89698843 | 1.83E+08 | 0.14 | -4.13 | 4.69 | 0.09 |
| E1 | GY | 2B | AX.89353728 | 1.82E+08 | 0.13 | -4.30 | 4.67 | 0.09 |
| E1 | GY | 2B | AX.89703625 | 6.62E+08 | 0.06 | -5.29 | 3.43 | 0.05 |
| E1 | GY | 2B | AX.89448342 | 1.01E+08 | 0.07 | -4.61 | 3.07 | 0.06 |
| E1 | GY | 2B | AX.89448342 | 1.01E+08 | 0.07 | -4.61 | 3.07 | 0.06 |
| E1 | GY | 2B | AX.89603427 | 1.87E+07 | 0.35 | 2.47  | 3.26 | 0.04 |
| E1 | GY | 2B | AX.89515639 | 5.95E+08 | 0.32 | 2.45  | 3.08 | 0.05 |
| E1 | GY | 2B | AX.89507099 | 1.55E+08 | 0.19 | -3.44 | 4.14 | 0.06 |
| E1 | GY | 2B | AX.89541745 | 1.82E+08 | 0.14 | -3.82 | 3.99 | 0.07 |
| E1 | GY | 2B | AX.89331795 | 1.79E+08 | 0.20 | -2.86 | 3.10 | 0.05 |
| E1 | GY | 2B | AX.89561621 | 7.57E+08 | 0.06 | -5.01 | 3.13 | 0.05 |
| E1 | GY | 2B | AX.89561621 | 7.57E+08 | 0.06 | -5.01 | 3.13 | 0.05 |

|    |    |    |             |          |      |       |      |      |
|----|----|----|-------------|----------|------|-------|------|------|
| E1 | GY | 2B | AX.89565875 | 1.03E+08 | 0.07 | -4.61 | 3.07 | 0.06 |
| E1 | GY | 2B | AX.89332143 | 1.82E+08 | 0.13 | -4.62 | 5.44 | 0.10 |
| E1 | GY | 2B | AX.89531346 | 7.82E+08 | 0.34 | -2.60 | 3.52 | 0.06 |
| E1 | GY | 2B | AX.89355285 | 1.83E+08 | 0.15 | -3.99 | 4.51 | 0.08 |
| E1 | GY | 2B | AX.89506146 | 1.01E+08 | 0.07 | -4.61 | 3.07 | 0.06 |
| E1 | GY | 2B | AX.89590619 | 1.81E+08 | 0.12 | -4.25 | 4.19 | 0.08 |
| E1 | GY | 2B | AX.89486060 | 1.80E+08 | 0.20 | -3.07 | 3.45 | 0.06 |
| E1 | GY | 2B | AX.89765084 | 1.81E+08 | 0.12 | -4.25 | 4.19 | 0.08 |
| E1 | GY | 2B | AX.89765084 | 1.81E+08 | 0.12 | -4.25 | 4.19 | 0.08 |
| E1 | GY | 2B | AX.89403225 | 1.03E+08 | 0.07 | -5.12 | 3.89 | 0.07 |
| E1 | GY | 2B | AX.89680788 | 7.52E+08 | 0.29 | -2.84 | 3.82 | 0.07 |
| E1 | GY | 2B | AX.89368860 | 6.59E+08 | 0.06 | -5.29 | 3.43 | 0.05 |
| E1 | GY | 2B | AX.89663766 | 1.43E+08 | 0.25 | -2.76 | 3.36 | 0.06 |
| E1 | GY | 2B | AX.89581448 | 1.01E+08 | 0.07 | -5.12 | 3.89 | 0.07 |
| E1 | GY | 2B | AX.89603789 | 1.03E+08 | 0.07 | -4.61 | 3.07 | 0.06 |
| E1 | GY | 2B | AX.89323244 | 1.83E+08 | 0.14 | -4.13 | 4.69 | 0.09 |
| E1 | GY | 2B | AX.89450884 | 5.95E+08 | 0.31 | 2.44  | 3.04 | 0.05 |
| E1 | GY | 2B | AX.89775110 | 1.29E+08 | 0.06 | -6.36 | 5.07 | 0.08 |
| E1 | GY | 2B | AX.89497642 | 1.82E+08 | 0.12 | -4.25 | 4.19 | 0.08 |
| E1 | GY | 2B | AX.89626847 | 1.81E+08 | 0.11 | -3.88 | 3.48 | 0.06 |
| E1 | GY | 2B | AX.89626847 | 1.81E+08 | 0.11 | -3.88 | 3.48 | 0.06 |
| E1 | GY | 2B | AX.89664717 | 4.57E+04 | 0.27 | -2.52 | 3.01 | 0.04 |
| E1 | GY | 2B | AX.89664717 | 4.57E+04 | 0.27 | -2.52 | 3.01 | 0.04 |
| E1 | GY | 2B | AX.89556126 | 7.90E+08 | 0.27 | -2.69 | 3.36 | 0.07 |
| E1 | GY | 2B | AX.89537014 | 7.93E+08 | 0.27 | -2.56 | 3.03 | 0.05 |
| E1 | GY | 2B | AX.89726427 | 7.93E+08 | 0.35 | -2.98 | 4.54 | 0.09 |
| E1 | GY | 2B | AX.89719069 | 7.57E+08 | 0.06 | -4.77 | 3.07 | 0.05 |
| E1 | GY | 2B | AX.89750183 | 5.63E+08 | 0.18 | -3.03 | 3.22 | 0.05 |
| E1 | GY | 2B | AX.89593250 | 1.81E+08 | 0.12 | -4.25 | 4.19 | 0.08 |
| E1 | GY | 2B | AX.89393550 | 7.59E+08 | 0.06 | -4.77 | 3.07 | 0.05 |
| E1 | GY | 2B | AX.89393550 | 7.59E+08 | 0.06 | -4.77 | 3.07 | 0.05 |
| E1 | GY | 2B | AX.89358906 | 7.57E+08 | 0.06 | -4.77 | 3.07 | 0.05 |
| E1 | GY | 2B | AX.89358906 | 7.57E+08 | 0.06 | -4.77 | 3.07 | 0.05 |
| E1 | GY | 2B | AX.89534791 | 1.02E+08 | 0.07 | -5.12 | 3.89 | 0.07 |
| E1 | GY | 2B | AX.89606237 | 1.47E+08 | 0.25 | -2.63 | 3.09 | 0.05 |
| E1 | GY | 2B | AX.89535150 | 1.02E+08 | 0.07 | -5.12 | 3.89 | 0.07 |
| E1 | GY | 2B | AX.89500123 | 7.85E+08 | 0.22 | -2.74 | 3.09 | 0.05 |
| E1 | GY | 2B | AX.89500123 | 7.85E+08 | 0.22 | -2.74 | 3.09 | 0.05 |
| E1 | GY | 2B | AX.89359515 | 5.94E+08 | 0.33 | 2.55  | 3.34 | 0.06 |
| E1 | GY | 2B | AX.89569931 | 6.62E+08 | 0.06 | -5.81 | 4.32 | 0.07 |
| E1 | GY | 2B | AX.89442198 | 1.02E+08 | 0.07 | -4.61 | 3.07 | 0.06 |
| E1 | GY | 2B | AX.89326350 | 1.81E+08 | 0.20 | -3.07 | 3.45 | 0.06 |
| E1 | GY | 2B | AX.89326350 | 1.81E+08 | 0.20 | -3.07 | 3.45 | 0.06 |
| E1 | GY | 2B | AX.89314257 | 1.43E+08 | 0.26 | -2.60 | 3.06 | 0.05 |
| E1 | GY | 2B | AX.89464649 | 1.84E+08 | 0.14 | -3.55 | 3.60 | 0.06 |
| E1 | GY | 2B | AX.89500920 | 1.79E+08 | 0.20 | -2.86 | 3.10 | 0.05 |
| E1 | GY | 2B | AX.89769704 | 7.58E+08 | 0.06 | -4.77 | 3.07 | 0.05 |
| E1 | GY | 2B | AX.89680788 | 7.52E+08 | 0.29 | -2.84 | 3.82 | 0.07 |
| E1 | GY | 2B | AX.89561986 | 1.81E+08 | 0.11 | -3.70 | 3.10 | 0.06 |
| E1 | GY | 2B | AX.89464930 | 1.42E+08 | 0.26 | -2.60 | 3.06 | 0.05 |

|    |    |    |             |          |      |       |      |      |
|----|----|----|-------------|----------|------|-------|------|------|
| E1 | GY | 2B | AX.89559315 | 8.39E+06 | 0.27 | -2.52 | 3.01 | 0.04 |
| E1 | GY | 2B | AX.89443026 | 5.95E+08 | 0.33 | 2.53  | 3.30 | 0.06 |
| E1 | GY | 2B | AX.89570875 | 1.43E+08 | 0.25 | -2.76 | 3.31 | 0.06 |
| E1 | GY | 2B | AX.89454401 | 7.84E+08 | 0.30 | -3.42 | 5.36 | 0.09 |
| E1 | GY | 2B | AX.89461833 | 6.59E+08 | 0.06 | -5.29 | 3.43 | 0.05 |
| E1 | GY | 2B | AX.89608525 | 1.04E+08 | 0.07 | -5.12 | 3.89 | 0.07 |
| E1 | GY | 2B | AX.89741917 | 1.44E+08 | 0.25 | -2.59 | 3.01 | 0.05 |
| E1 | GY | 2B | AX.89560360 | 3.87E+05 | 0.27 | -2.52 | 3.01 | 0.04 |
| E1 | GY | 2B | AX.89742203 | 1.03E+08 | 0.07 | -4.61 | 3.07 | 0.06 |
| E1 | GY | 2B | AX.89742203 | 1.03E+08 | 0.07 | -4.61 | 3.07 | 0.06 |
| E1 | GY | 2B | AX.89433133 | 3.30E+05 | 0.27 | -2.52 | 3.01 | 0.04 |
| E1 | GY | 2B | AX.89619964 | 1.78E+08 | 0.20 | -3.07 | 3.45 | 0.06 |
| E1 | GY | 2B | AX.89560733 | 5.95E+08 | 0.33 | 2.53  | 3.30 | 0.06 |
| E1 | GY | 2B | AX.89397326 | 1.79E+08 | 0.20 | -3.07 | 3.45 | 0.06 |
| E1 | GY | 2B | AX.89693837 | 1.40E+08 | 0.25 | -2.63 | 3.09 | 0.05 |
| E1 | GY | 2B | AX.89726785 | 6.62E+08 | 0.06 | -5.29 | 3.43 | 0.05 |
| E1 | GY | 2B | AX.89572391 | 1.82E+08 | 0.13 | -4.30 | 4.67 | 0.09 |
| E1 | GY | 2B | AX.89641042 | 7.65E+08 | 0.12 | -3.88 | 3.59 | 0.07 |
| E1 | GY | 2B | AX.89564960 | 1.80E+08 | 0.20 | -3.07 | 3.45 | 0.06 |
| E1 | GY | 2B | AX.89491567 | 1.84E+08 | 0.14 | -3.82 | 3.99 | 0.07 |
| E1 | GY | 2B | AX.89564994 | 1.81E+08 | 0.11 | -3.88 | 3.48 | 0.06 |
| E1 | GY | 2B | AX.89549272 | 1.34E+08 | 0.06 | -6.36 | 5.07 | 0.08 |
| E1 | GY | 2B | AX.89549378 | 1.47E+08 | 0.20 | -2.92 | 3.17 | 0.05 |
| E1 | GY | 2B | AX.89316984 | 1.83E+08 | 0.14 | -3.82 | 3.99 | 0.07 |
| E1 | GY | 2B | AX.89538158 | 9.00E+06 | 0.27 | -2.52 | 3.01 | 0.04 |
| E1 | GY | 2B | AX.89669665 | 1.82E+08 | 0.13 | -4.30 | 4.67 | 0.09 |
| E1 | GY | 2B | AX.89669665 | 1.82E+08 | 0.13 | -4.30 | 4.67 | 0.09 |
| E1 | GY | 2B | AX.89681803 | 7.59E+08 | 0.06 | -5.01 | 3.13 | 0.05 |
| E1 | GY | 2B | AX.89480571 | 1.83E+08 | 0.14 | -3.82 | 3.99 | 0.07 |
| E1 | GY | 2B | AX.89621449 | 1.02E+08 | 0.07 | -4.61 | 3.07 | 0.06 |
| E1 | GY | 2B | AX.89363748 | 1.03E+08 | 0.07 | -4.61 | 3.07 | 0.06 |
| E1 | GY | 2B | AX.89363748 | 1.03E+08 | 0.07 | -4.61 | 3.07 | 0.06 |
| E1 | GY | 2B | AX.89386320 | 4.52E+04 | 0.27 | -2.52 | 3.01 | 0.04 |
| E1 | GY | 2B | AX.89434536 | 1.82E+08 | 0.13 | -4.62 | 5.44 | 0.10 |
| E1 | GY | 2B | AX.89755632 | 7.93E+08 | 0.26 | -2.79 | 3.49 | 0.07 |
| E1 | GY | 2B | AX.89755743 | 1.02E+08 | 0.07 | -4.61 | 3.07 | 0.06 |
| E1 | GY | 2B | AX.89631015 | 1.40E+08 | 0.24 | -2.80 | 3.35 | 0.06 |
| E1 | GY | 2B | AX.89493544 | 1.00E+08 | 0.07 | -5.12 | 3.89 | 0.07 |
| E1 | GY | 2B | AX.89423116 | 5.95E+08 | 0.33 | 2.53  | 3.30 | 0.06 |
| E1 | GY | 2B | AX.89469345 | 2.07E+07 | 0.08 | 4.32  | 3.21 | 0.05 |
| E1 | GY | 2B | AX.89469521 | 1.83E+08 | 0.14 | -4.13 | 4.69 | 0.09 |
| E1 | GY | 2B | AX.89647582 | 1.29E+08 | 0.06 | -6.36 | 5.07 | 0.08 |
| E1 | GY | 2B | AX.89575490 | 1.81E+08 | 0.12 | -4.25 | 4.19 | 0.08 |
| E1 | GY | 2B | AX.89458240 | 1.82E+08 | 0.13 | -4.30 | 4.67 | 0.09 |
| E1 | GY | 2B | AX.89710344 | 7.57E+08 | 0.07 | -5.04 | 3.58 | 0.06 |
| E1 | GY | 2B | AX.89401624 | 4.53E+05 | 0.27 | -2.52 | 3.01 | 0.04 |
| E1 | GY | 2B | AX.89771483 | 7.57E+08 | 0.06 | -4.77 | 3.07 | 0.05 |
| E1 | GY | 2B | AX.89552651 | 1.81E+08 | 0.12 | -4.25 | 4.19 | 0.08 |
| E1 | GY | 2B | AX.89673819 | 9.13E+06 | 0.45 | -2.37 | 3.26 | 0.06 |
| E1 | GY | 2B | AX.89734860 | 1.81E+08 | 0.11 | -3.88 | 3.48 | 0.06 |



|    |      |    |             |          |      |       |      |      |
|----|------|----|-------------|----------|------|-------|------|------|
| E1 | GY   | 2B | AX.89507099 | 1.55E+08 | 0.19 | -3.44 | 4.14 | 0.06 |
| E1 | GY   | 2B | AX.89496140 | 5.06E+05 | 0.27 | -2.52 | 3.01 | 0.04 |
| E1 | GY   | 2B | AX.89686633 | 5.94E+08 | 0.32 | 2.55  | 3.32 | 0.06 |
| E1 | GY   | 2B | AX.89542229 | 1.02E+08 | 0.07 | -4.61 | 3.07 | 0.06 |
| E1 | GY   | 2B | AX.89637464 | 7.60E+08 | 0.06 | -4.77 | 3.07 | 0.05 |
| E1 | GY   | 2B | AX.89637464 | 7.60E+08 | 0.06 | -4.77 | 3.07 | 0.05 |
| E1 | GY   | 2B | AX.89332441 | 1.83E+08 | 0.14 | -4.13 | 4.69 | 0.09 |
| E1 | GY   | 2B | AX.89577473 | 7.58E+08 | 0.06 | -4.77 | 3.07 | 0.05 |
| E1 | GY   | 2B | AX.89614104 | 6.59E+08 | 0.06 | -5.29 | 3.43 | 0.05 |
| E1 | GY   | 2B | AX.89504410 | 1.83E+08 | 0.14 | -3.82 | 3.99 | 0.07 |
| E1 | GY   | 2B | AX.89486060 | 1.80E+08 | 0.20 | -3.07 | 3.45 | 0.06 |
| E1 | GY   | 2B | AX.89332789 | 1.80E+08 | 0.20 | -3.07 | 3.45 | 0.06 |
| E1 | GY   | 2B | AX.89460581 | 1.43E+08 | 0.25 | -2.76 | 3.31 | 0.06 |
| E1 | GY   | 2B | AX.89543258 | 1.47E+08 | 0.25 | -2.63 | 3.09 | 0.05 |
| E1 | GY   | 2B | AX.89614451 | 1.83E+08 | 0.14 | -3.82 | 3.99 | 0.07 |
| E1 | GY   | 2B | AX.89368225 | 7.85E+08 | 0.10 | -3.98 | 3.28 | 0.05 |
| E1 | GY   | 2B | AX.89403432 | 1.79E+07 | 0.24 | 2.84  | 3.40 | 0.04 |
| E1 | GY   | 2B | AX.89403445 | 7.52E+08 | 0.27 | -2.53 | 3.00 | 0.05 |
| E1 | GY   | 2B | AX.89749024 | 1.82E+08 | 0.13 | -4.30 | 4.67 | 0.09 |
| E1 | GY   | 2B | AX.89323590 | 1.43E+08 | 0.25 | -2.76 | 3.31 | 0.06 |
| E1 | GY   | 2B | AX.89323590 | 1.43E+08 | 0.25 | -2.76 | 3.31 | 0.06 |
| E1 | GY   | 2B | AX.89474590 | 1.82E+08 | 0.12 | -4.25 | 4.19 | 0.08 |
| E1 | GY   | 2B | AX.89369934 | 7.51E+08 | 0.33 | -2.41 | 3.06 | 0.05 |
| E1 | GY   | 2B | AX.89552764 | 7.52E+08 | 0.29 | -2.52 | 3.10 | 0.05 |
| E1 | GY   | 2B | AX.89552764 | 7.52E+08 | 0.29 | -2.52 | 3.10 | 0.05 |
| E1 | GY   | 2B | AX.89393166 | 7.57E+08 | 0.07 | -5.13 | 3.90 | 0.06 |
| E1 | GY   | 2B | AX.89416940 | 7.64E+08 | 0.12 | -3.88 | 3.59 | 0.07 |
| E1 | GY   | 2B | AX.89416940 | 7.64E+08 | 0.12 | -3.88 | 3.59 | 0.07 |
| E1 | GY   | 2B | AX.89588768 | 6.60E+08 | 0.06 | -5.29 | 3.43 | 0.05 |
| E1 | GY   | 2B | AX.89370035 | 9.11E+06 | 0.23 | -3.62 | 5.15 | 0.09 |
| E1 | GY   | 2B | AX.89452013 | 1.82E+08 | 0.14 | -4.28 | 4.87 | 0.09 |
| E1 | GY   | 2B | AX.89616747 | 1.03E+08 | 0.07 | -4.61 | 3.07 | 0.06 |
| E1 | GY   | 2B | AX.89523462 | 1.84E+08 | 0.13 | -3.81 | 3.77 | 0.07 |
| E1 | GY   | 2B | AX.89507172 | 1.79E+08 | 0.20 | -3.07 | 3.45 | 0.06 |
| E1 | GY   | 2B | AX.89698976 | 7.57E+08 | 0.06 | -5.01 | 3.13 | 0.05 |
| E1 | GY   | 2B | AX.89739171 | 7.95E+08 | 0.41 | -2.41 | 3.30 | 0.05 |
| E1 | GY   | 2B | AX.89678145 | 7.95E+08 | 0.20 | -2.87 | 3.12 | 0.05 |
| E1 | GY   | 2B | AX.89727377 | 5.94E+08 | 0.33 | 2.53  | 3.30 | 0.06 |
| E1 | GY   | 2B | AX.89617368 | 1.01E+08 | 0.07 | -4.61 | 3.07 | 0.06 |
| E1 | GY   | 2B | AX.89617425 | 3.15E+05 | 0.28 | -2.51 | 3.02 | 0.04 |
| E1 | GY   | 2B | AX.89499795 | 6.62E+08 | 0.06 | -5.29 | 3.43 | 0.05 |
| E1 | GY   | 2B | AX.89535150 | 1.02E+08 | 0.07 | -5.12 | 3.89 | 0.07 |
| E1 | GY   | 2B | AX.89682491 | 1.81E+08 | 0.12 | -3.46 | 3.03 | 0.05 |
| E1 | GY   | 2B | AX.89513011 | 9.12E+06 | 0.40 | -2.46 | 3.39 | 0.07 |
| E1 | SPM2 | 2B | AX.89724036 | 7.09E+08 | 0.27 | 19.03 | 3.28 | 0.06 |
| E1 | GY   | 2B | AX.89728726 | 6.62E+08 | 0.06 | -5.29 | 3.43 | 0.05 |
| E1 | GY   | 2B | AX.89359988 | 1.78E+08 | 0.20 | -3.07 | 3.45 | 0.06 |
| E1 | GPS  | 2B | AX.89709253 | 9.30E+07 | 0.39 | 1.29  | 3.72 | 0.06 |
| E1 | GY   | 2B | AX.89536238 | 7.90E+08 | 0.13 | -3.99 | 3.98 | 0.07 |
| E1 | GY   | 2B | AX.89443026 | 5.95E+08 | 0.33 | 2.53  | 3.30 | 0.06 |

|    |     |    |             |          |      |       |      |      |
|----|-----|----|-------------|----------|------|-------|------|------|
| E1 | GY  | 2B | AX.89679762 | 1.43E+08 | 0.25 | -2.76 | 3.31 | 0.06 |
| E1 | GY  | 2B | AX.89630862 | 1.84E+08 | 0.14 | -4.13 | 4.69 | 0.09 |
| E1 | GY  | 2B | AX.89626799 | 1.82E+08 | 0.11 | -3.88 | 3.48 | 0.06 |
| E1 | GY  | 2B | AX.89408614 | 7.65E+08 | 0.12 | -3.88 | 3.59 | 0.07 |
| E1 | GY  | 2B | AX.89443676 | 7.58E+08 | 0.06 | -4.77 | 3.07 | 0.05 |
| E1 | GY  | 2B | AX.89745765 | 1.02E+08 | 0.07 | -4.61 | 3.07 | 0.06 |
| E1 | GY  | 2B | AX.89608525 | 1.04E+08 | 0.07 | -5.12 | 3.89 | 0.07 |
| E1 | GY  | 2B | AX.89373157 | 1.84E+08 | 0.14 | -4.29 | 4.89 | 0.09 |
| E1 | GY  | 2B | AX.89718549 | 1.00E+08 | 0.07 | -4.61 | 3.07 | 0.06 |
| E1 | GY  | 2B | AX.89396912 | 1.02E+08 | 0.07 | -5.12 | 3.89 | 0.07 |
| E1 | GPS | 2B | AX.89603017 | 4.79E+06 | 0.49 | 1.14  | 3.18 | 0.05 |
| E1 | GY  | 2B | AX.89656746 | 7.93E+08 | 0.31 | -2.98 | 4.25 | 0.09 |
| E1 | GY  | 2B | AX.89338392 | 7.90E+08 | 0.12 | -4.31 | 4.43 | 0.08 |
| E1 | GY  | 2B | AX.89327830 | 7.59E+08 | 0.06 | -4.77 | 3.07 | 0.05 |
| E1 | GY  | 2B | AX.89549272 | 1.34E+08 | 0.06 | -6.36 | 5.07 | 0.08 |
| E1 | GY  | 2B | AX.89338416 | 7.60E+08 | 0.06 | -4.77 | 3.07 | 0.05 |
| E1 | GY  | 2B | AX.89410146 | 1.84E+08 | 0.14 | -4.13 | 4.69 | 0.09 |
| E1 | GY  | 2B | AX.89374293 | 1.02E+08 | 0.07 | -5.12 | 3.89 | 0.07 |
| E1 | GY  | 2B | AX.89743242 | 1.90E+07 | 0.38 | -2.33 | 3.03 | 0.04 |
| E1 | GY  | 2B | AX.89708086 | 1.84E+08 | 0.14 | -3.82 | 3.99 | 0.07 |
| E1 | GY  | 2B | AX.89480023 | 1.81E+08 | 0.12 | -4.25 | 4.19 | 0.08 |
| E1 | GY  | 2B | AX.89560172 | 7.46E+08 | 0.35 | -2.36 | 3.03 | 0.05 |
| E1 | GY  | 2B | AX.89681803 | 7.59E+08 | 0.06 | -5.01 | 3.13 | 0.05 |
| E1 | GPS | 2B | AX.89314636 | 9.12E+07 | 0.40 | 1.13  | 3.02 | 0.05 |
| E1 | GY  | 2B | AX.89703355 | 1.81E+08 | 0.12 | -4.25 | 4.19 | 0.08 |
| E1 | GPS | 2B | AX.89350212 | 1.12E+07 | 0.38 | -1.23 | 3.43 | 0.06 |
| E1 | GY  | 2B | AX.89339086 | 1.41E+08 | 0.26 | -2.60 | 3.06 | 0.05 |
| E1 | GY  | 2B | AX.89730333 | 1.81E+08 | 0.12 | -3.82 | 3.48 | 0.06 |
| E1 | GY  | 2B | AX.89730333 | 1.81E+08 | 0.12 | -3.82 | 3.48 | 0.06 |
| E1 | GY  | 2B | AX.89560602 | 7.60E+08 | 0.06 | -5.75 | 3.97 | 0.06 |
| E1 | GY  | 2B | AX.89641351 | 3.69E+05 | 0.27 | -2.52 | 3.01 | 0.04 |
| E1 | GY  | 2B | AX.89445883 | 1.83E+08 | 0.14 | -3.82 | 3.99 | 0.07 |
| E1 | GY  | 2B | AX.89422340 | 7.89E+08 | 0.10 | -3.75 | 3.07 | 0.05 |
| E1 | GY  | 2B | AX.89434536 | 1.82E+08 | 0.13 | -4.62 | 5.44 | 0.10 |
| E1 | GY  | 2B | AX.89728349 | 1.84E+08 | 0.14 | -3.82 | 3.99 | 0.07 |
| E1 | GY  | 2B | AX.89728349 | 1.84E+08 | 0.14 | -3.82 | 3.99 | 0.07 |
| E1 | GY  | 2B | AX.89621714 | 1.83E+08 | 0.14 | -4.13 | 4.69 | 0.09 |
| E1 | GY  | 2B | AX.89682796 | 1.84E+08 | 0.09 | -4.72 | 4.24 | 0.08 |
| E1 | GY  | 2B | AX.89658674 | 6.27E+05 | 0.27 | -2.52 | 3.01 | 0.04 |
| E1 | GY  | 2B | AX.89658674 | 6.27E+05 | 0.27 | -2.52 | 3.01 | 0.04 |
| E1 | GY  | 2B | AX.89755743 | 1.02E+08 | 0.07 | -4.61 | 3.07 | 0.06 |
| E1 | GY  | 2B | AX.89621767 | 1.44E+08 | 0.25 | -2.59 | 3.01 | 0.05 |
| E1 | GY  | 2B | AX.89621767 | 1.44E+08 | 0.25 | -2.59 | 3.01 | 0.05 |
| E1 | GY  | 2B | AX.89375686 | 6.61E+08 | 0.06 | -5.29 | 3.43 | 0.05 |
| E1 | GY  | 2B | AX.89400073 | 7.53E+08 | 0.29 | -2.61 | 3.29 | 0.06 |
| E1 | GY  | 2B | AX.89659140 | 7.93E+08 | 0.14 | -3.75 | 3.86 | 0.07 |
| E1 | GY  | 2B | AX.89752463 | 1.14E+07 | 0.10 | 3.73  | 3.05 | 0.05 |
| E1 | GY  | 2B | AX.86164438 | 7.85E+08 | 0.22 | -2.74 | 3.09 | 0.05 |
| E1 | GY  | 2B | AX.89688062 | 1.84E+08 | 0.08 | -4.58 | 3.70 | 0.07 |
| E1 | GY  | 2B | AX.89483240 | 7.95E+08 | 0.41 | -2.41 | 3.30 | 0.05 |

|    |     |    |             |          |      |       |      |      |
|----|-----|----|-------------|----------|------|-------|------|------|
| E1 | GY  | 2B | AX.89555674 | 1.80E+08 | 0.20 | -3.07 | 3.45 | 0.06 |
| E1 | GPS | 2B | AX.89612780 | 9.58E+07 | 0.40 | 1.22  | 3.42 | 0.06 |
| E1 | GY  | 2B | AX.89483565 | 6.62E+08 | 0.06 | -5.29 | 3.43 | 0.05 |
| E1 | GY  | 2B | AX.89483565 | 6.62E+08 | 0.06 | -5.29 | 3.43 | 0.05 |
| E1 | GY  | 2B | AX.89469711 | 1.85E+08 | 0.09 | -4.30 | 3.47 | 0.06 |
| E1 | GY  | 2B | AX.89447263 | 5.15E+05 | 0.27 | -2.52 | 3.01 | 0.04 |
| E1 | GY  | 2B | AX.89605178 | 1.03E+08 | 0.07 | -4.61 | 3.07 | 0.06 |
| E1 | GY  | 2B | AX.89762335 | 1.47E+08 | 0.25 | -2.61 | 3.04 | 0.05 |
| E1 | GY  | 2B | AX.89762335 | 1.47E+08 | 0.25 | -2.61 | 3.04 | 0.05 |
| E1 | GPS | 2B | AX.89667403 | 1.12E+07 | 0.38 | -1.19 | 3.22 | 0.05 |
| E1 | GY  | 2B | AX.89413015 | 6.59E+08 | 0.06 | -5.29 | 3.43 | 0.05 |
| E1 | GY  | 2B | AX.89734127 | 7.59E+08 | 0.05 | -6.10 | 4.09 | 0.07 |
| E1 | GY  | 2B | AX.89734149 | 7.57E+08 | 0.06 | -4.77 | 3.07 | 0.05 |
| E1 | GY  | 2B | AX.89717315 | 1.79E+08 | 0.20 | -2.86 | 3.10 | 0.05 |
| E1 | GY  | 2B | AX.89631602 | 7.93E+08 | 0.35 | -2.98 | 4.54 | 0.09 |
| E1 | GY  | 2B | AX.89725266 | 1.83E+08 | 0.14 | -3.82 | 3.99 | 0.07 |
| E1 | GY  | 2B | AX.89774692 | 1.02E+08 | 0.07 | -4.61 | 3.07 | 0.06 |
| E1 | GY  | 2B | AX.89448318 | 1.02E+08 | 0.07 | -4.61 | 3.07 | 0.06 |
| E1 | GY  | 2B | AX.89448318 | 1.02E+08 | 0.07 | -4.61 | 3.07 | 0.06 |
| E1 | GY  | 2B | AX.86169218 | 1.84E+08 | 0.09 | -4.30 | 3.47 | 0.06 |
| E1 | GY  | 2B | AX.89515639 | 5.95E+08 | 0.32 | 2.45  | 3.08 | 0.05 |
| E1 | GPS | 2B | AX.89552494 | 9.74E+07 | 0.37 | 1.22  | 3.35 | 0.06 |
| E1 | GY  | 2B | AX.89612967 | 6.61E+08 | 0.06 | -5.29 | 3.43 | 0.05 |
| E1 | GY  | 2B | AX.89612967 | 6.61E+08 | 0.06 | -5.29 | 3.43 | 0.05 |
| E1 | GPS | 2B | AX.89636806 | 9.84E+07 | 0.36 | 1.25  | 3.46 | 0.06 |
| E1 | GY  | 2B | AX.89331795 | 1.79E+08 | 0.20 | -2.86 | 3.10 | 0.05 |
| E1 | GY  | 2B | AX.89524212 | 1.84E+08 | 0.14 | -3.74 | 3.94 | 0.07 |
| E1 | GY  | 2B | AX.89524212 | 1.84E+08 | 0.14 | -3.74 | 3.94 | 0.07 |
| E1 | GY  | 2B | AX.89760340 | 7.65E+08 | 0.12 | -3.88 | 3.59 | 0.07 |
| E1 | GY  | 2B | AX.89598424 | 1.82E+08 | 0.14 | -3.82 | 3.99 | 0.07 |
| E1 | GY  | 2B | AX.89598424 | 1.82E+08 | 0.14 | -3.82 | 3.99 | 0.07 |
| E1 | GY  | 2B | AX.89724351 | 1.82E+08 | 0.13 | -4.30 | 4.67 | 0.09 |
| E1 | GY  | 2B | AX.89736400 | 1.82E+08 | 0.13 | -4.30 | 4.67 | 0.09 |
| E1 | GY  | 2B | AX.89696341 | 7.59E+08 | 0.06 | -4.77 | 3.07 | 0.05 |
| E1 | GPS | 2B | AX.89559923 | 9.58E+07 | 0.40 | 1.13  | 3.03 | 0.05 |
| E1 | GY  | 2B | AX.89760737 | 7.63E+08 | 0.24 | -2.69 | 3.15 | 0.05 |
| E1 | GY  | 2B | AX.89774222 | 1.42E+08 | 0.26 | -2.60 | 3.06 | 0.05 |
| E1 | GY  | 2B | AX.89387058 | 1.03E+08 | 0.07 | -5.12 | 3.89 | 0.07 |
| E1 | GY  | 2B | AX.89387058 | 1.03E+08 | 0.07 | -5.12 | 3.89 | 0.07 |
| E1 | GY  | 2B | AX.89672039 | 1.02E+08 | 0.07 | -5.12 | 3.89 | 0.07 |
| E1 | GY  | 2B | AX.89774529 | 1.83E+08 | 0.14 | -3.82 | 3.99 | 0.07 |
| E1 | GY  | 2B | AX.89591313 | 6.60E+08 | 0.07 | -4.52 | 3.14 | 0.05 |
| E1 | GPS | 2B | AX.89674753 | 1.12E+07 | 0.37 | -1.19 | 3.22 | 0.05 |
| E1 | GPS | 2B | AX.89426625 | 9.22E+07 | 0.39 | 1.20  | 3.33 | 0.06 |
| E1 | GY  | 2B | AX.89500416 | 4.81E+04 | 0.27 | -2.52 | 3.01 | 0.04 |
| E1 | GY  | 2B | AX.89629939 | 6.62E+08 | 0.07 | -5.01 | 3.55 | 0.06 |
| E1 | GY  | 2B | AX.89689244 | 8.00E+08 | 0.08 | -4.70 | 3.71 | 0.06 |
| E1 | GY  | 2B | AX.89616056 | 5.94E+08 | 0.32 | 2.55  | 3.32 | 0.06 |
| E1 | GPS | 2B | AX.89347241 | 9.49E+07 | 0.40 | 1.22  | 3.42 | 0.06 |
| E1 | GY  | 2B | AX.89451802 | 6.59E+08 | 0.06 | -5.29 | 3.43 | 0.05 |

|    |      |    |             |          |      |       |      |      |
|----|------|----|-------------|----------|------|-------|------|------|
| E1 | GY   | 2B | AX.89585973 | 6.15E+08 | 0.33 | 2.49  | 3.22 | 0.06 |
| E1 | GY   | 2B | AX.89452013 | 1.82E+08 | 0.14 | -4.28 | 4.87 | 0.09 |
| E1 | GY   | 2B | AX.89628294 | 1.81E+08 | 0.13 | -3.82 | 3.68 | 0.07 |
| E1 | GY   | 2B | AX.89628294 | 1.81E+08 | 0.13 | -3.82 | 3.68 | 0.07 |
| E1 | GY   | 2B | AX.89523629 | 1.83E+08 | 0.14 | -3.82 | 3.99 | 0.07 |
| E1 | GY   | 2B | AX.89523666 | 1.02E+08 | 0.07 | -4.61 | 3.07 | 0.06 |
| E1 | GY   | 2B | AX.89523666 | 1.02E+08 | 0.07 | -4.61 | 3.07 | 0.06 |
| E1 | GY   | 2B | AX.89709245 | 1.29E+08 | 0.06 | -6.36 | 5.07 | 0.08 |
| E1 | GY   | 2B | AX.89575510 | 1.34E+08 | 0.06 | -6.36 | 5.07 | 0.08 |
| E1 | GY   | 2B | AX.89605804 | 1.82E+08 | 0.14 | -4.23 | 4.88 | 0.09 |
| E1 | GY   | 2B | AX.89418425 | 7.46E+08 | 0.40 | -2.32 | 3.09 | 0.05 |
| E1 | GY   | 2B | AX.89666887 | 1.30E+08 | 0.07 | -6.79 | 6.05 | 0.10 |
| E1 | GPS  | 2B | AX.89527843 | 9.80E+07 | 0.37 | 1.22  | 3.35 | 0.06 |
| E1 | GPS  | 2B | AX.89486691 | 1.13E+07 | 0.27 | -1.32 | 3.31 | 0.06 |
| E1 | GY   | 2B | AX.89496808 | 4.39E+04 | 0.27 | -2.52 | 3.01 | 0.04 |
| E1 | GY   | 2B | AX.89632512 | 1.03E+08 | 0.07 | -4.61 | 3.07 | 0.06 |
| E1 | GPS  | 2B | AX.89688762 | 9.80E+07 | 0.37 | 1.22  | 3.35 | 0.06 |
| E1 | GY   | 2B | AX.89776966 | 1.02E+08 | 0.07 | -4.61 | 3.07 | 0.06 |
| E1 | GY   | 2B | AX.89655408 | 1.01E+08 | 0.07 | -4.61 | 3.07 | 0.06 |
| E1 | GY   | 2B | AX.89764413 | 1.83E+08 | 0.14 | -3.82 | 3.99 | 0.07 |
| E1 | GY   | 2B | AX.89561986 | 1.81E+08 | 0.11 | -3.70 | 3.10 | 0.06 |
| E1 | GY   | 2B | AX.89559315 | 8.39E+06 | 0.27 | -2.52 | 3.01 | 0.04 |
| E1 | GPS  | 2B | AX.89572059 | 1.12E+07 | 0.38 | -1.23 | 3.43 | 0.06 |
| E1 | GY   | 2B | AX.89699414 | 1.79E+08 | 0.20 | -2.86 | 3.10 | 0.05 |
| E1 | GY   | 2B | AX.89699414 | 1.79E+08 | 0.20 | -2.86 | 3.10 | 0.05 |
| E1 | GY   | 2B | AX.89610028 | 1.44E+08 | 0.25 | -2.62 | 3.07 | 0.05 |
| E1 | GY   | 2B | AX.89668164 | 1.84E+08 | 0.09 | -4.30 | 3.47 | 0.06 |
| E1 | GY   | 2B | AX.89668164 | 1.84E+08 | 0.09 | -4.30 | 3.47 | 0.06 |
| E1 | GPS  | 2B | AX.89407215 | 9.30E+07 | 0.39 | 1.29  | 3.72 | 0.06 |
| E1 | GY   | 2B | AX.89644113 | 1.84E+08 | 0.12 | -4.27 | 4.24 | 0.08 |
| E1 | GY   | 2B | AX.89660518 | 1.00E+08 | 0.07 | -4.61 | 3.07 | 0.06 |
| E1 | GY   | 2B | AX.89705968 | 1.26E+08 | 0.06 | -6.36 | 5.07 | 0.08 |
| E1 | GY   | 2B | AX.89665143 | 1.78E+08 | 0.20 | -3.07 | 3.45 | 0.06 |
| E1 | GY   | 2B | AX.89433133 | 3.30E+05 | 0.27 | -2.52 | 3.01 | 0.04 |
| E1 | GY   | 2B | AX.89765905 | 1.02E+08 | 0.07 | -4.61 | 3.07 | 0.06 |
| E1 | GY   | 2B | AX.89765905 | 1.02E+08 | 0.07 | -4.61 | 3.07 | 0.06 |
| E1 | GY   | 2B | AX.89560733 | 5.95E+08 | 0.33 | 2.53  | 3.30 | 0.06 |
| E1 | GY   | 2B | AX.89693837 | 1.40E+08 | 0.25 | -2.63 | 3.09 | 0.05 |
| E1 | GY   | 2B | AX.89641042 | 7.65E+08 | 0.12 | -3.88 | 3.59 | 0.07 |
| E1 | GPS  | 2B | AX.86163702 | 9.37E+07 | 0.37 | 1.22  | 3.35 | 0.06 |
| E1 | GY   | 2B | AX.89719353 | 1.54E+08 | 0.23 | -2.77 | 3.18 | 0.05 |
| E1 | GY   | 2B | AX.89719353 | 1.54E+08 | 0.23 | -2.77 | 3.18 | 0.05 |
| E1 | GY   | 2B | AX.89338416 | 7.60E+08 | 0.06 | -4.77 | 3.07 | 0.05 |
| E1 | GY   | 2B | AX.89316984 | 1.83E+08 | 0.14 | -3.82 | 3.99 | 0.07 |
| E1 | GY   | 2B | AX.89560172 | 7.46E+08 | 0.35 | -2.36 | 3.03 | 0.05 |
| E1 | SPM2 | 2B | AX.89343410 | 7.11E+08 | 0.20 | 23.05 | 3.83 | 0.07 |
| E1 | GY   | 2B | AX.89703355 | 1.81E+08 | 0.12 | -4.25 | 4.19 | 0.08 |
| E1 | GY   | 2B | AX.89351218 | 6.59E+08 | 0.06 | -5.81 | 4.32 | 0.07 |
| E1 | GY   | 2B | AX.89684472 | 1.81E+08 | 0.12 | -3.87 | 3.68 | 0.07 |
| E1 | GY   | 2B | AX.89730024 | 1.82E+08 | 0.13 | -4.62 | 5.44 | 0.10 |

|    |     |    |             |          |      |       |      |      |
|----|-----|----|-------------|----------|------|-------|------|------|
| E1 | GY  | 2B | AX.89730024 | 1.82E+08 | 0.13 | -4.62 | 5.44 | 0.10 |
| E1 | GY  | 2B | AX.89432832 | 6.31E+05 | 0.27 | -2.52 | 3.01 | 0.04 |
| E1 | GY  | 2B | AX.89595331 | 1.84E+08 | 0.14 | -3.55 | 3.60 | 0.06 |
| E1 | GY  | 2B | AX.89595331 | 1.84E+08 | 0.14 | -3.55 | 3.60 | 0.06 |
| E1 | GY  | 2B | AX.89528928 | 3.65E+05 | 0.27 | -2.52 | 3.01 | 0.04 |
| E1 | GY  | 2B | AX.89687896 | 1.02E+08 | 0.07 | -4.61 | 3.07 | 0.06 |
| E1 | GY  | 2B | AX.89664777 | 1.04E+08 | 0.07 | -4.61 | 3.07 | 0.06 |
| E1 | GY  | 2B | AX.89352375 | 7.95E+08 | 0.28 | -3.06 | 4.24 | 0.07 |
| E1 | GY  | 2B | AX.89574794 | 1.02E+08 | 0.07 | -4.61 | 3.07 | 0.06 |
| E1 | GPS | 2B | AX.89614148 | 9.05E+07 | 0.39 | 1.23  | 3.42 | 0.06 |
| E1 | GY  | 2B | AX.89494298 | 7.60E+08 | 0.06 | -4.77 | 3.07 | 0.05 |
| E1 | GY  | 2B | AX.89740553 | 1.03E+08 | 0.07 | -5.12 | 3.89 | 0.07 |
| E1 | GY  | 2B | AX.89740553 | 1.03E+08 | 0.07 | -5.12 | 3.89 | 0.07 |
| E1 | GY  | 2B | AX.89458240 | 1.82E+08 | 0.13 | -4.30 | 4.67 | 0.09 |
| E1 | GY  | 2B | AX.89698843 | 1.83E+08 | 0.14 | -4.13 | 4.69 | 0.09 |
| E1 | GY  | 2B | AX.89599756 | 1.44E+08 | 0.25 | -2.59 | 3.01 | 0.05 |
| E1 | GY  | 2B | AX.89631602 | 7.93E+08 | 0.35 | -2.98 | 4.54 | 0.09 |
| E1 | GY  | 2B | AX.89353728 | 1.82E+08 | 0.13 | -4.30 | 4.67 | 0.09 |
| E1 | GY  | 2B | AX.89771820 | 7.93E+08 | 0.35 | -2.95 | 4.44 | 0.09 |
| E1 | GY  | 2B | AX.89771820 | 7.93E+08 | 0.35 | -2.95 | 4.44 | 0.09 |
| E1 | GY  | 2B | AX.89541694 | 1.40E+08 | 0.13 | -3.46 | 3.20 | 0.06 |
| E1 | GY  | 2B | AX.89603427 | 1.87E+07 | 0.35 | 2.47  | 3.26 | 0.04 |
| E1 | GPS | 2B | AX.89650540 | 9.18E+07 | 0.39 | 1.29  | 3.72 | 0.06 |
| E1 | GY  | 2B | AX.89636775 | 9.13E+06 | 0.26 | -2.71 | 3.28 | 0.05 |
| E1 | GY  | 2B | AX.89636775 | 9.13E+06 | 0.26 | -2.71 | 3.28 | 0.05 |
| E1 | GY  | 2B | AX.89558016 | 1.84E+08 | 0.14 | -3.82 | 3.99 | 0.07 |
| E1 | GY  | 2B | AX.89563904 | 1.40E+08 | 0.24 | -2.80 | 3.35 | 0.06 |
| E1 | GY  | 2B | AX.89593173 | 1.03E+08 | 0.07 | -4.61 | 3.07 | 0.06 |
| E1 | GY  | 2B | AX.89593173 | 1.03E+08 | 0.07 | -4.61 | 3.07 | 0.06 |
| E1 | GY  | 2B | AX.89748488 | 5.06E+05 | 0.27 | -2.72 | 3.40 | 0.05 |
| E1 | GY  | 2B | AX.89531346 | 7.82E+08 | 0.34 | -2.60 | 3.52 | 0.06 |
| E1 | GY  | 2B | AX.89717112 | 3.65E+05 | 0.27 | -2.52 | 3.01 | 0.04 |
| E1 | GY  | 2B | AX.89506146 | 1.01E+08 | 0.07 | -4.61 | 3.07 | 0.06 |
| E1 | GY  | 2B | AX.89590619 | 1.81E+08 | 0.12 | -4.25 | 4.19 | 0.08 |
| E1 | GY  | 2B | AX.89625965 | 1.83E+08 | 0.14 | -4.13 | 4.69 | 0.09 |
| E1 | GY  | 2B | AX.89681279 | 5.95E+08 | 0.33 | 2.53  | 3.30 | 0.06 |
| E1 | GY  | 2B | AX.89681279 | 5.95E+08 | 0.33 | 2.53  | 3.30 | 0.06 |
| E1 | GY  | 2B | AX.89469035 | 7.60E+08 | 0.06 | -4.77 | 3.07 | 0.05 |
| E1 | GY  | 2B | AX.89713274 | 7.75E+08 | 0.08 | -5.32 | 4.81 | 0.09 |
| E1 | GY  | 2B | AX.89676429 | 5.94E+08 | 0.32 | 2.42  | 3.02 | 0.05 |
| E1 | GY  | 2B | AX.89676429 | 5.94E+08 | 0.32 | 2.42  | 3.02 | 0.05 |
| E1 | GY  | 2B | AX.89540932 | 6.62E+08 | 0.06 | -5.29 | 3.43 | 0.05 |
| E1 | GY  | 2B | AX.89718685 | 1.82E+08 | 0.13 | -4.62 | 5.44 | 0.10 |
| E1 | GY  | 2B | AX.89677120 | 1.79E+08 | 0.20 | -2.85 | 3.14 | 0.05 |
| E1 | GY  | 2B | AX.89677120 | 1.79E+08 | 0.20 | -2.85 | 3.14 | 0.05 |
| E1 | GY  | 2B | AX.89652950 | 5.94E+08 | 0.32 | 2.42  | 3.02 | 0.05 |
| E1 | GY  | 2B | AX.89556519 | 1.83E+08 | 0.14 | -3.82 | 3.99 | 0.07 |
| E1 | GY  | 2B | AX.89719069 | 7.57E+08 | 0.06 | -4.77 | 3.07 | 0.05 |
| E1 | GY  | 2B | AX.89346022 | 1.70E+08 | 0.10 | 3.80  | 3.14 | 0.05 |
| E1 | GY  | 2B | AX.89451935 | 1.79E+07 | 0.24 | 2.74  | 3.24 | 0.04 |

|    |      |    |             |          |      |         |      |      |
|----|------|----|-------------|----------|------|---------|------|------|
| E1 | GY   | 2B | AX.89690045 | 1.82E+08 | 0.13 | -4.62   | 5.44 | 0.10 |
| E1 | GPS  | 2B | AX.89546593 | 9.59E+07 | 0.40 | 1.24    | 3.51 | 0.06 |
| E1 | GY   | 2B | AX.89678145 | 7.95E+08 | 0.20 | -2.87   | 3.12 | 0.05 |
| E1 | GY   | 2B | AX.89605899 | 1.81E+08 | 0.13 | -4.55   | 5.29 | 0.10 |
| E1 | GY   | 2B | AX.89606237 | 1.47E+08 | 0.25 | -2.63   | 3.09 | 0.05 |
| E1 | GY   | 2B | AX.89359231 | 4.67E+04 | 0.27 | -2.52   | 3.01 | 0.04 |
| E1 | GY   | 2B | AX.89359231 | 4.67E+04 | 0.27 | -2.52   | 3.01 | 0.04 |
| E1 | GY   | 2B | AX.89594592 | 1.80E+08 | 0.20 | -3.07   | 3.45 | 0.06 |
| E1 | GY   | 2B | AX.89721075 | 1.03E+08 | 0.07 | -5.12   | 3.89 | 0.07 |
| E1 | GY   | 2B | AX.89721075 | 1.03E+08 | 0.07 | -5.12   | 3.89 | 0.07 |
| E1 | GY   | 2B | AX.89629911 | 5.25E+05 | 0.27 | -2.52   | 3.01 | 0.04 |
| E1 | GY   | 2B | AX.89752453 | 7.64E+08 | 0.12 | -3.88   | 3.59 | 0.07 |
| E1 | GY   | 2B | AX.89360195 | 7.59E+08 | 0.06 | -4.77   | 3.07 | 0.05 |
| E1 | GY   | 2B | AX.89500920 | 1.79E+08 | 0.20 | -2.86   | 3.10 | 0.05 |
| E1 | GY   | 2B | AX.89769704 | 7.58E+08 | 0.06 | -4.77   | 3.07 | 0.05 |
| E1 | GY   | 2B | AX.89454067 | 1.82E+08 | 0.13 | -4.62   | 5.44 | 0.10 |
| E1 | GY   | 2B | AX.89464930 | 1.42E+08 | 0.26 | -2.60   | 3.06 | 0.05 |
| E1 | GY   | 2B | AX.89729189 | 1.83E+08 | 0.14 | -4.13   | 4.69 | 0.09 |
| E1 | GY   | 2B | AX.89570875 | 1.43E+08 | 0.25 | -2.76   | 3.31 | 0.06 |
| E1 | GY   | 2B | AX.89610028 | 1.44E+08 | 0.25 | -2.62   | 3.07 | 0.05 |
| E1 | GY   | 2B | AX.89770264 | 1.83E+08 | 0.14 | -4.13   | 4.69 | 0.09 |
| E1 | GY   | 2B | AX.89664208 | 6.61E+08 | 0.06 | -5.29   | 3.43 | 0.05 |
| E1 | GY   | 2B | AX.89454401 | 7.84E+08 | 0.30 | -3.42   | 5.36 | 0.09 |
| E1 | GY   | 2B | AX.89408614 | 7.65E+08 | 0.12 | -3.88   | 3.59 | 0.07 |
| E1 | GY   | 2B | AX.89745765 | 1.02E+08 | 0.07 | -4.61   | 3.07 | 0.06 |
| E1 | GY   | 2B | AX.89466177 | 7.95E+08 | 0.41 | -2.34   | 3.12 | 0.05 |
| E1 | GY   | 2B | AX.89560360 | 3.87E+05 | 0.27 | -2.52   | 3.01 | 0.04 |
| E1 | GY   | 2B | AX.89440441 | 1.31E+08 | 0.06 | -5.75   | 4.24 | 0.07 |
| E1 | GY   | 2B | AX.89397326 | 1.79E+08 | 0.20 | -3.07   | 3.45 | 0.06 |
| E1 | GY   | 2B | AX.89568935 | 5.94E+08 | 0.32 | 2.55    | 3.32 | 0.06 |
| E1 | GY   | 2B | AX.89538603 | 4.69E+04 | 0.27 | -2.52   | 3.01 | 0.04 |
| E1 | GY   | 2B | AX.89621449 | 1.02E+08 | 0.07 | -4.61   | 3.07 | 0.06 |
| E1 | GY   | 2B | AX.89731814 | 7.53E+08 | 0.29 | -2.52   | 3.10 | 0.05 |
| E1 | GY   | 2B | AX.89731814 | 7.53E+08 | 0.29 | -2.52   | 3.10 | 0.05 |
| E1 | GY   | 2B | AX.89641351 | 3.69E+05 | 0.27 | -2.52   | 3.01 | 0.04 |
| E1 | GY   | 2B | AX.89562158 | 6.60E+08 | 0.06 | -5.29   | 3.43 | 0.05 |
| E1 | GY   | 2B | AX.89399328 | 1.83E+08 | 0.14 | -3.82   | 3.99 | 0.07 |
| E1 | GY   | 2B | AX.89476521 | 1.82E+08 | 0.12 | -4.25   | 4.19 | 0.08 |
| E1 | GY   | 2B | AX.89476521 | 1.82E+08 | 0.12 | -4.25   | 4.19 | 0.08 |
| E1 | GY   | 2B | AX.89755632 | 7.93E+08 | 0.26 | -2.79   | 3.49 | 0.07 |
| E1 | GY   | 2B | AX.89562493 | 1.02E+08 | 0.07 | -4.61   | 3.07 | 0.06 |
| E1 | GY   | 2B | AX.89562493 | 1.02E+08 | 0.07 | -4.61   | 3.07 | 0.06 |
| E1 | GY   | 2B | AX.89631015 | 1.40E+08 | 0.24 | -2.80   | 3.35 | 0.06 |
| E1 | GY   | 2B | AX.89457015 | 1.81E+08 | 0.11 | -3.88   | 3.48 | 0.06 |
| E1 | GY   | 2B | AX.89493544 | 1.00E+08 | 0.07 | -5.12   | 3.89 | 0.07 |
| E1 | GY   | 2B | AX.89618714 | 1.03E+08 | 0.07 | -4.61   | 3.07 | 0.06 |
| E1 | GY   | 2B | AX.89695960 | 1.01E+08 | 0.07 | -4.61   | 3.07 | 0.06 |
| E1 | GY   | 2B | AX.89695960 | 1.01E+08 | 0.07 | -4.61   | 3.07 | 0.06 |
| E1 | GPM2 | 2B | AX.89409101 | 7.85E+08 | 0.14 | -827.86 | 3.08 | 0.05 |
| E1 | GY   | 2B | AX.89469711 | 1.85E+08 | 0.09 | -4.30   | 3.47 | 0.06 |

|    |      |    |             |          |      |         |      |      |
|----|------|----|-------------|----------|------|---------|------|------|
| E1 | GY   | 2B | AX.89505960 | 7.46E+08 | 0.35 | -2.35   | 3.01 | 0.05 |
| E1 | GY   | 2B | AX.89330831 | 5.95E+08 | 0.33 | 2.53    | 3.30 | 0.06 |
| E1 | GY   | 2B | AX.89710344 | 7.57E+08 | 0.07 | -5.04   | 3.58 | 0.06 |
| E1 | GPM2 | 2B | AX.89456255 | 4.60E+04 | 0.27 | -659.01 | 3.14 | 0.05 |
| E1 | GPM2 | 2B | AX.89629911 | 5.25E+05 | 0.27 | -659.01 | 3.14 | 0.05 |
| E1 | GPM2 | 2B | AX.89682796 | 1.84E+08 | 0.09 | -990.87 | 3.02 | 0.05 |
| E1 | GY   | 2B | AX.89612574 | 1.85E+08 | 0.09 | -4.30   | 3.47 | 0.06 |
| E1 | GPM2 | 2B | AX.89659140 | 7.93E+08 | 0.14 | -889.67 | 3.40 | 0.06 |
| E1 | GY   | 2B | AX.89589720 | 1.02E+08 | 0.07 | -5.12   | 3.89 | 0.07 |
| E1 | GY   | 2B | AX.89724272 | 6.62E+08 | 0.06 | -5.81   | 4.32 | 0.07 |
| E1 | GY   | 2B | AX.89724272 | 6.62E+08 | 0.06 | -5.81   | 4.32 | 0.07 |
| E1 | GY   | 2B | AX.89686938 | 4.55E+04 | 0.27 | -2.52   | 3.01 | 0.04 |
| E1 | GY   | 2B | AX.89577473 | 7.58E+08 | 0.06 | -4.77   | 3.07 | 0.05 |
| E1 | GPM2 | 2B | AX.89538158 | 9.00E+06 | 0.27 | -659.01 | 3.14 | 0.05 |
| E1 | GY   | 2B | AX.89602946 | 1.02E+08 | 0.07 | -4.61   | 3.07 | 0.06 |
| E1 | GY   | 2B | AX.89368225 | 7.85E+08 | 0.10 | -3.98   | 3.28 | 0.05 |
| E1 | SPM2 | 2B | AX.89398225 | 1.78E+07 | 0.38 | 16.89   | 3.10 | 0.04 |
| E1 | GY   | 2B | AX.89543659 | 7.85E+08 | 0.24 | -3.19   | 4.17 | 0.07 |
| E1 | GY   | 2B | AX.89697559 | 1.84E+08 | 0.09 | -4.30   | 3.47 | 0.06 |
| E1 | GPM2 | 2B | AX.89617425 | 3.15E+05 | 0.28 | -675.72 | 3.30 | 0.05 |
| E1 | GY   | 2B | AX.89571192 | 1.02E+08 | 0.07 | -4.61   | 3.07 | 0.06 |
| E1 | GY   | 2B | AX.89571192 | 1.02E+08 | 0.07 | -4.61   | 3.07 | 0.06 |
| E1 | GY   | 2B | AX.89770628 | 7.77E+08 | 0.49 | -2.39   | 3.34 | 0.05 |
| E1 | GY   | 2B | AX.89500416 | 4.81E+04 | 0.27 | -2.52   | 3.01 | 0.04 |
| E1 | SPM2 | 2B | AX.89477745 | 4.32E+08 | 0.05 | 39.99   | 3.49 | 0.06 |
| E1 | GY   | 2B | AX.89369630 | 1.46E+08 | 0.22 | -2.73   | 3.03 | 0.05 |
| E1 | GY   | 2B | AX.89677005 | 1.40E+08 | 0.24 | -2.80   | 3.35 | 0.06 |
| E1 | GY   | 2B | AX.89652950 | 5.94E+08 | 0.32 | 2.42    | 3.02 | 0.05 |
| E1 | GY   | 2B | AX.89511482 | 1.83E+08 | 0.13 | -3.70   | 3.69 | 0.07 |
| E1 | GY   | 2B | AX.89616747 | 1.03E+08 | 0.07 | -4.61   | 3.07 | 0.06 |
| E1 | GY   | 2B | AX.89507172 | 1.79E+08 | 0.20 | -3.07   | 3.45 | 0.06 |
| E1 | GY   | 2B | AX.89657904 | 1.41E+08 | 0.26 | -2.60   | 3.06 | 0.05 |
| E1 | GY   | 2B | AX.89617368 | 1.01E+08 | 0.07 | -4.61   | 3.07 | 0.06 |
| E1 | GY   | 2B | AX.89617425 | 3.15E+05 | 0.28 | -2.51   | 3.02 | 0.04 |
| E1 | GY   | 2B | AX.89499795 | 6.62E+08 | 0.06 | -5.29   | 3.43 | 0.05 |
| E1 | GY   | 2B | AX.89776966 | 1.02E+08 | 0.07 | -4.61   | 3.07 | 0.06 |
| E1 | GY   | 2B | AX.89547217 | 1.81E+08 | 0.11 | -3.88   | 3.48 | 0.06 |
| E1 | GY   | 2B | AX.89547217 | 1.81E+08 | 0.11 | -3.88   | 3.48 | 0.06 |
| E1 | GY   | 2B | AX.89595787 | 1.84E+08 | 0.14 | -3.82   | 3.99 | 0.07 |
| E1 | GY   | 2B | AX.89595787 | 1.84E+08 | 0.14 | -3.82   | 3.99 | 0.07 |
| E1 | GPS  | 2B | AX.89634274 | 9.25E+07 | 0.40 | 1.30    | 3.81 | 0.06 |
| E1 | GY   | 2B | AX.89713743 | 1.84E+08 | 0.14 | -3.82   | 3.99 | 0.07 |
| E1 | GY   | 2B | AX.89373157 | 1.84E+08 | 0.14 | -4.29   | 4.89 | 0.09 |
| E1 | GY   | 2B | AX.89718549 | 1.00E+08 | 0.07 | -4.61   | 3.07 | 0.06 |
| E1 | GY   | 2B | AX.89749678 | 6.59E+08 | 0.06 | -5.29   | 3.43 | 0.05 |
| E1 | GY   | 2B | AX.89660518 | 1.00E+08 | 0.07 | -4.61   | 3.07 | 0.06 |
| E1 | GPM2 | 2B | AX.89674559 | 8.60E+06 | 0.35 | -616.91 | 3.15 | 0.05 |
| E1 | GY   | 2B | AX.89656746 | 7.93E+08 | 0.31 | -2.98   | 4.25 | 0.09 |
| E1 | GPS  | 2B | AX.89753034 | 1.12E+07 | 0.38 | -1.19   | 3.22 | 0.05 |
| E1 | GY   | 2B | AX.89374293 | 1.02E+08 | 0.07 | -5.12   | 3.89 | 0.07 |

|    |      |    |             |          |      |          |      |      |
|----|------|----|-------------|----------|------|----------|------|------|
| E1 | GY   | 2B | AX.89583382 | 1.81E+08 | 0.12 | -4.25    | 4.19 | 0.08 |
| E1 | GY   | 2B | AX.89480023 | 1.81E+08 | 0.12 | -4.25    | 4.19 | 0.08 |
| E1 | GPM2 | 2B | AX.89486691 | 1.13E+07 | 0.27 | -724.00  | 3.65 | 0.06 |
| E1 | GPS  | 2B | AX.86163701 | 9.37E+07 | 0.37 | 1.22     | 3.35 | 0.06 |
| E1 | GY   | 2B | AX.89560602 | 7.60E+08 | 0.06 | -5.75    | 3.97 | 0.06 |
| E1 | GY   | 2B | AX.89445890 | 1.79E+08 | 0.20 | -2.86    | 3.10 | 0.05 |
| E1 | GY   | 2B | AX.89422340 | 7.89E+08 | 0.10 | -3.75    | 3.07 | 0.05 |
| E1 | GY   | 2B | AX.89621714 | 1.83E+08 | 0.14 | -4.13    | 4.69 | 0.09 |
| E1 | GY   | 2B | AX.89752463 | 1.14E+07 | 0.10 | 3.73     | 3.05 | 0.05 |
| E1 | GY   | 2B | AX.89688062 | 1.84E+08 | 0.08 | -4.58    | 3.70 | 0.07 |
| E1 | GPS  | 2B | AX.89601276 | 9.76E+07 | 0.37 | 1.22     | 3.35 | 0.06 |
| E1 | GPS  | 2B | AX.89561906 | 9.84E+07 | 0.36 | 1.21     | 3.27 | 0.06 |
| E1 | GY   | 2B | AX.89555674 | 1.80E+08 | 0.20 | -3.07    | 3.45 | 0.06 |
| E1 | GY   | 2B | AX.89605178 | 1.03E+08 | 0.07 | -4.61    | 3.07 | 0.06 |
| E1 | GY   | 2B | AX.89510083 | 1.85E+08 | 0.09 | -4.30    | 3.47 | 0.06 |
| E1 | GY   | 2B | AX.89510083 | 1.85E+08 | 0.09 | -4.30    | 3.47 | 0.06 |
| E1 | GY   | 2B | AX.89377106 | 1.01E+08 | 0.07 | -4.61    | 3.07 | 0.06 |
| E1 | GPS  | 2B | AX.89474800 | 9.58E+07 | 0.40 | 1.22     | 3.42 | 0.06 |
| E1 | GY   | 2B | AX.89774692 | 1.02E+08 | 0.07 | -4.61    | 3.07 | 0.06 |
| E1 | GPM2 | 2B | AX.89748488 | 5.06E+05 | 0.27 | -684.76  | 3.32 | 0.05 |
| E1 | GPS  | 2B | AX.86162637 | 9.49E+07 | 0.37 | 1.22     | 3.35 | 0.06 |
| E1 | GPM2 | 2B | AX.89463396 | 1.84E+08 | 0.12 | -893.74  | 3.09 | 0.05 |
| E1 | GY   | 2B | AX.89661546 | 5.94E+08 | 0.32 | 2.42     | 3.02 | 0.05 |
| E1 | GPS  | 2B | AX.89699089 | 9.84E+07 | 0.37 | 1.16     | 3.05 | 0.05 |
| E1 | GY   | 2B | AX.89719172 | 3.65E+05 | 0.27 | -2.52    | 3.01 | 0.04 |
| E1 | GY   | 2B | AX.89724351 | 1.82E+08 | 0.13 | -4.30    | 4.67 | 0.09 |
| E1 | GPS  | 2B | AX.86169040 | 9.30E+07 | 0.38 | 1.36     | 4.04 | 0.07 |
| E1 | GPM2 | 2B | AX.89760312 | 7.72E+08 | 0.19 | 848.40   | 3.89 | 0.07 |
| E1 | GY   | 2B | AX.89774222 | 1.42E+08 | 0.26 | -2.60    | 3.06 | 0.05 |
| E1 | GY   | 2B | AX.89672039 | 1.02E+08 | 0.07 | -5.12    | 3.89 | 0.07 |
| E1 | GPM2 | 2B | AX.89599657 | 1.02E+07 | 0.24 | -682.38  | 3.10 | 0.05 |
| E1 | GY   | 2B | AX.89774529 | 1.83E+08 | 0.14 | -3.82    | 3.99 | 0.07 |
| E1 | GY   | 2B | AX.89591313 | 6.60E+08 | 0.07 | -4.52    | 3.14 | 0.05 |
| E1 | GPM2 | 2B | AX.89559315 | 8.39E+06 | 0.27 | -659.01  | 3.14 | 0.05 |
| E1 | GPS  | 2B | AX.89353462 | 1.12E+07 | 0.38 | -1.19    | 3.22 | 0.05 |
| E1 | GY   | 2B | AX.89761980 | 7.94E+08 | 0.11 | -4.21    | 3.87 | 0.07 |
| E1 | GY   | 2B | AX.89688716 | 7.93E+08 | 0.17 | -3.41    | 3.81 | 0.07 |
| E1 | GY   | 2B | AX.89775110 | 1.29E+08 | 0.06 | -6.36    | 5.07 | 0.08 |
| E1 | GY   | 2B | AX.89737929 | 1.01E+08 | 0.07 | -4.61    | 3.07 | 0.06 |
| E1 | GY   | 2B | AX.89737929 | 1.01E+08 | 0.07 | -4.61    | 3.07 | 0.06 |
| E1 | GY   | 2B | AX.89629939 | 6.62E+08 | 0.07 | -5.01    | 3.55 | 0.06 |
| E1 | GPS  | 2B | AX.89736015 | 9.58E+07 | 0.40 | 1.15     | 3.09 | 0.05 |
| E1 | GY   | 2B | AX.89487985 | 1.83E+08 | 0.14 | -3.82    | 3.99 | 0.07 |
| E1 | GY   | 2B | AX.89451802 | 6.59E+08 | 0.06 | -5.29    | 3.43 | 0.05 |
| E1 | GPM2 | 2B | AX.89666887 | 1.30E+08 | 0.07 | -1166.73 | 3.02 | 0.05 |
| E1 | GPM2 | 2B | AX.89755632 | 7.93E+08 | 0.26 | -665.04  | 3.10 | 0.06 |
| E1 | GPM2 | 2B | AX.89496140 | 5.06E+05 | 0.27 | -659.01  | 3.14 | 0.05 |
| E1 | GY   | 2B | AX.89523629 | 1.83E+08 | 0.14 | -3.82    | 3.99 | 0.07 |
| E1 | GPS  | 2B | AX.89506182 | 1.03E+08 | 0.44 | -1.18    | 3.29 | 0.06 |
| E1 | GPS  | 2B | AX.89697344 | 9.58E+07 | 0.40 | 1.13     | 3.03 | 0.05 |



|    |      |    |             |          |      |         |      |      |
|----|------|----|-------------|----------|------|---------|------|------|
| E1 | GPS  | 2B | AX.89454401 | 7.84E+08 | 0.30 | -1.24   | 3.14 | 0.05 |
| E1 | GY   | 2B | AX.89418425 | 7.46E+08 | 0.40 | -2.32   | 3.09 | 0.05 |
| E1 | GY   | 2B | AX.89558174 | 1.81E+08 | 0.12 | -4.25   | 4.19 | 0.08 |
| E1 | GPM2 | 2B | AX.89664717 | 4.57E+04 | 0.27 | -659.01 | 3.14 | 0.05 |
| E1 | GY   | 2B | AX.89627218 | 7.64E+08 | 0.12 | -3.88   | 3.59 | 0.07 |
| E1 | GY   | 2B | AX.89632512 | 1.03E+08 | 0.07 | -4.61   | 3.07 | 0.06 |
| E1 | GPS  | 2B | AX.89420920 | 9.23E+07 | 0.39 | 1.28    | 3.68 | 0.06 |
| E1 | GY   | 2B | AX.89764413 | 1.83E+08 | 0.14 | -3.82   | 3.99 | 0.07 |
| E1 | GY   | 2B | AX.89408291 | 1.40E+08 | 0.13 | -3.50   | 3.18 | 0.06 |
| E1 | GPM2 | 2B | AX.89465592 | 4.53E+05 | 0.27 | -650.18 | 3.04 | 0.05 |
| E1 | GY   | 2B | AX.89526250 | 1.01E+08 | 0.07 | -4.61   | 3.07 | 0.06 |
| E1 | GY   | 2B | AX.89668347 | 7.64E+08 | 0.12 | -3.88   | 3.59 | 0.07 |
| E1 | GY   | 2B | AX.89705968 | 1.26E+08 | 0.06 | -6.36   | 5.07 | 0.08 |
| E1 | GY   | 2B | AX.89665143 | 1.78E+08 | 0.20 | -3.07   | 3.45 | 0.06 |
| E1 | GY   | 2B | AX.89596143 | 1.02E+08 | 0.07 | -4.61   | 3.07 | 0.06 |
| E1 | GY   | 2B | AX.89564960 | 1.80E+08 | 0.20 | -3.07   | 3.45 | 0.06 |
| E1 | GPM2 | 2B | AX.89770628 | 7.77E+08 | 0.49 | -606.90 | 3.31 | 0.05 |
| E1 | GPM2 | 2B | AX.89717112 | 3.65E+05 | 0.27 | -659.01 | 3.14 | 0.05 |
| E1 | GY   | 2B | AX.89676847 | 1.54E+08 | 0.23 | -2.77   | 3.18 | 0.05 |
| E1 | GY   | 2B | AX.89676847 | 1.54E+08 | 0.23 | -2.77   | 3.18 | 0.05 |
| E1 | GY   | 2B | AX.89645229 | 7.93E+08 | 0.35 | -2.98   | 4.54 | 0.09 |
| E1 | GY   | 2B | AX.89645229 | 7.93E+08 | 0.35 | -2.98   | 4.54 | 0.09 |
| E1 | GY   | 2B | AX.89432832 | 6.31E+05 | 0.27 | -2.52   | 3.01 | 0.04 |
| E1 | GY   | 2B | AX.89457015 | 1.81E+08 | 0.11 | -3.88   | 3.48 | 0.06 |
| E1 | GY   | 2B | AX.89664777 | 1.04E+08 | 0.07 | -4.61   | 3.07 | 0.06 |
| E1 | GY   | 2B | AX.89352375 | 7.95E+08 | 0.28 | -3.06   | 4.24 | 0.07 |
| E1 | GY   | 2B | AX.89529518 | 5.94E+08 | 0.32 | 2.55    | 3.32 | 0.06 |
| E1 | GPM2 | 2B | AX.89390226 | 1.02E+07 | 0.24 | -682.38 | 3.10 | 0.05 |
| E1 | GY   | 2B | AX.89650120 | 1.78E+08 | 0.20 | -3.07   | 3.45 | 0.06 |
| E1 | GPM2 | 2B | AX.89686938 | 4.55E+04 | 0.27 | -659.01 | 3.14 | 0.05 |
| E1 | GY   | 2B | AX.89552327 | 1.78E+08 | 0.20 | -3.07   | 3.45 | 0.06 |
| E1 | GY   | 2B | AX.89599756 | 1.44E+08 | 0.25 | -2.59   | 3.01 | 0.05 |
| E1 | GY   | 2B | AX.89750857 | 1.81E+08 | 0.11 | -3.88   | 3.48 | 0.06 |
| E1 | GY   | 2B | AX.89703625 | 6.62E+08 | 0.06 | -5.29   | 3.43 | 0.05 |
| E1 | GY   | 2B | AX.89678102 | 1.03E+08 | 0.07 | -4.61   | 3.07 | 0.06 |
| E1 | GY   | 2B | AX.89678102 | 1.03E+08 | 0.07 | -4.61   | 3.07 | 0.06 |
| E1 | GY   | 2B | AX.89541694 | 1.40E+08 | 0.13 | -3.46   | 3.20 | 0.06 |
| E1 | GPM2 | 2B | AX.89727516 | 1.45E+07 | 0.39 | 613.29  | 3.23 | 0.06 |
| E1 | GY   | 2B | AX.89538197 | 1.80E+08 | 0.20 | -2.85   | 3.04 | 0.05 |
| E1 | GY   | 2B | AX.89538197 | 1.80E+08 | 0.20 | -2.85   | 3.04 | 0.05 |
| E1 | GPM2 | 2B | AX.89556126 | 7.90E+08 | 0.27 | -658.99 | 3.14 | 0.06 |
| E1 | GY   | 2B | AX.89563904 | 1.40E+08 | 0.24 | -2.80   | 3.35 | 0.06 |
| E1 | GPM2 | 2B | AX.89432832 | 6.31E+05 | 0.27 | -659.01 | 3.14 | 0.05 |
| E1 | GY   | 2B | AX.89748488 | 5.06E+05 | 0.27 | -2.72   | 3.40 | 0.05 |
| E1 | GY   | 2B | AX.89717112 | 3.65E+05 | 0.27 | -2.52   | 3.01 | 0.04 |
| E1 | GPM2 | 2B | AX.89404329 | 9.74E+06 | 0.27 | -659.01 | 3.14 | 0.05 |
| E1 | GPM2 | 2B | AX.89743242 | 1.90E+07 | 0.38 | -825.47 | 5.36 | 0.09 |
| E1 | GY   | 2B | AX.89673041 | 6.59E+08 | 0.06 | -5.29   | 3.43 | 0.05 |
| E1 | GY   | 2B | AX.89673041 | 6.59E+08 | 0.06 | -5.29   | 3.43 | 0.05 |
| E1 | GY   | 2B | AX.89625965 | 1.83E+08 | 0.14 | -4.13   | 4.69 | 0.09 |

|    |      |    |             |          |      |         |      |      |
|----|------|----|-------------|----------|------|---------|------|------|
| E1 | GY   | 2B | AX.89469035 | 7.60E+08 | 0.06 | -4.77   | 3.07 | 0.05 |
| E1 | GY   | 2B | AX.89749024 | 1.82E+08 | 0.13 | -4.30   | 4.67 | 0.09 |
| E1 | GY   | 2B | AX.89540932 | 6.62E+08 | 0.06 | -5.29   | 3.43 | 0.05 |
| E1 | GY   | 2B | AX.89323675 | 6.59E+08 | 0.06 | -5.29   | 3.43 | 0.05 |
| E1 | GY   | 2B | AX.89556519 | 1.83E+08 | 0.14 | -3.82   | 3.99 | 0.07 |
| E1 | GY   | 2B | AX.89564994 | 1.81E+08 | 0.11 | -3.88   | 3.48 | 0.06 |
| E1 | GY   | 2B | AX.89605899 | 1.81E+08 | 0.13 | -4.55   | 5.29 | 0.10 |
| E1 | GY   | 2B | AX.89359145 | 9.58E+07 | 0.06 | -5.39   | 3.78 | 0.06 |
| E1 | GY   | 2B | AX.89359145 | 9.58E+07 | 0.06 | -5.39   | 3.78 | 0.06 |
| E1 | GY   | 2B | AX.89629911 | 5.25E+05 | 0.27 | -2.52   | 3.01 | 0.04 |
| E1 | GY   | 2B | AX.89752453 | 7.64E+08 | 0.12 | -3.88   | 3.59 | 0.07 |
| E1 | GY   | 2B | AX.89536238 | 7.90E+08 | 0.13 | -3.99   | 3.98 | 0.07 |
| E1 | GY   | 2B | AX.89729189 | 1.83E+08 | 0.14 | -4.13   | 4.69 | 0.09 |
| E1 | GY   | 2B | AX.89770264 | 1.83E+08 | 0.14 | -4.13   | 4.69 | 0.09 |
| E1 | GY   | 2B | AX.89572391 | 1.82E+08 | 0.13 | -4.30   | 4.67 | 0.09 |
| E1 | GY   | 2B | AX.89568935 | 5.94E+08 | 0.32 | 2.55    | 3.32 | 0.06 |
| E1 | GY   | 2B | AX.89538603 | 4.69E+04 | 0.27 | -2.52   | 3.01 | 0.04 |
| E1 | GY   | 2B | AX.89745248 | 1.82E+08 | 0.12 | -4.25   | 4.19 | 0.08 |
| E1 | GY   | 2B | AX.89469345 | 2.07E+07 | 0.08 | 4.32    | 3.21 | 0.05 |
| E1 | GY   | 2B | AX.89647344 | 7.59E+08 | 0.06 | -4.77   | 3.07 | 0.05 |
| E1 | GPM2 | 2B | AX.89656746 | 7.93E+08 | 0.31 | -625.94 | 3.04 | 0.06 |
| E1 | GY   | 2B | AX.89575490 | 1.81E+08 | 0.12 | -4.25   | 4.19 | 0.08 |
| E1 | GPM2 | 2B | AX.89496808 | 4.39E+04 | 0.27 | -659.01 | 3.14 | 0.05 |
| E1 | GPM2 | 2B | AX.89528928 | 3.65E+05 | 0.27 | -659.01 | 3.14 | 0.05 |
| E1 | GY   | 2B | AX.89686938 | 4.55E+04 | 0.27 | -2.52   | 3.01 | 0.04 |
| E1 | GY   | 2B | AX.89403445 | 7.52E+08 | 0.27 | -2.53   | 3.00 | 0.05 |
| E1 | GY   | 2B | AX.89368860 | 6.59E+08 | 0.06 | -5.29   | 3.43 | 0.05 |
| E1 | GY   | 2B | AX.89697559 | 1.84E+08 | 0.09 | -4.30   | 3.47 | 0.06 |
| E1 | GY   | 2B | AX.89677005 | 1.40E+08 | 0.24 | -2.80   | 3.35 | 0.06 |
| E1 | GY   | 2B | AX.89369934 | 7.51E+08 | 0.33 | -2.41   | 3.06 | 0.05 |
| E1 | GPM2 | 2B | AX.89761980 | 7.94E+08 | 0.11 | -957.08 | 3.17 | 0.06 |
| E1 | GPM2 | 2B | AX.89433133 | 3.30E+05 | 0.27 | -659.01 | 3.14 | 0.05 |
| E1 | GY   | 2B | AX.89682491 | 1.81E+08 | 0.12 | -3.46   | 3.03 | 0.05 |
| E1 | GY   | 2B | AX.89442198 | 1.02E+08 | 0.07 | -4.61   | 3.07 | 0.06 |
| E1 | GY   | 2B | AX.89728726 | 6.62E+08 | 0.06 | -5.29   | 3.43 | 0.05 |
| E1 | GY   | 2B | AX.89765862 | 6.60E+08 | 0.06 | -5.29   | 3.43 | 0.05 |
| E1 | GPS  | 2B | AX.89634319 | 1.12E+07 | 0.37 | -1.15   | 3.01 | 0.05 |
| E1 | GPS  | 2B | AX.89539151 | 9.84E+07 | 0.37 | 1.16    | 3.05 | 0.05 |
| E1 | GPM2 | 2B | AX.89538603 | 4.69E+04 | 0.27 | -659.01 | 3.14 | 0.05 |
| E1 | GPM2 | 2B | AX.89500416 | 4.81E+04 | 0.27 | -659.01 | 3.14 | 0.05 |
| E1 | GY   | 2B | AX.89743242 | 1.90E+07 | 0.38 | -2.33   | 3.03 | 0.04 |
| E1 | GPM2 | 2B | AX.89560360 | 3.87E+05 | 0.27 | -659.01 | 3.14 | 0.05 |
| E1 | GY   | 2B | AX.89583382 | 1.81E+08 | 0.12 | -4.25   | 4.19 | 0.08 |
| E1 | GY   | 2B | AX.89731365 | 1.41E+08 | 0.26 | -2.60   | 3.06 | 0.05 |
| E1 | GPM2 | 2B | AX.89536238 | 7.90E+08 | 0.13 | -988.78 | 3.78 | 0.07 |
| E1 | GPM2 | 2B | AX.89452576 | 3.18E+05 | 0.27 | -659.01 | 3.14 | 0.05 |
| E1 | GPS  | 2B | AX.89409381 | 9.59E+07 | 0.40 | 1.13    | 3.03 | 0.05 |
| E1 | GPS  | 2B | AX.89739904 | 9.72E+07 | 0.37 | 1.22    | 3.35 | 0.06 |
| E1 | GPM2 | 2B | AX.89411485 | 4.88E+04 | 0.27 | -659.01 | 3.14 | 0.05 |
| E1 | GPS  | 2B | AX.89679990 | 9.59E+07 | 0.40 | 1.22    | 3.42 | 0.06 |

|    |      |    |             |          |      |          |      |      |
|----|------|----|-------------|----------|------|----------|------|------|
| E1 | GPM2 | 2B | AX.89733954 | 1.02E+07 | 0.23 | -690.62  | 3.09 | 0.05 |
| E1 | GPM2 | 2B | AX.89658674 | 6.27E+05 | 0.27 | -659.01  | 3.14 | 0.05 |
| E1 | TKW  | 2B | AX.89386261 | 5.18E+08 | 0.09 | -1.54    | 3.42 | 0.06 |
| E1 | TKW  | 2B | AX.89388627 | 2.45E+07 | 0.45 | 0.95     | 3.77 | 0.06 |
| E1 | GPS  | 2B | AX.89493965 | 9.59E+07 | 0.40 | 1.13     | 3.03 | 0.05 |
| E1 | GPS  | 2B | AX.89547662 | 4.75E+06 | 0.45 | -1.18    | 3.31 | 0.06 |
| E1 | TKW  | 2B | AX.89401751 | 7.44E+08 | 0.37 | 0.90     | 3.24 | 0.06 |
| E1 | GPM2 | 2B | AX.89401624 | 4.53E+05 | 0.27 | -659.01  | 3.14 | 0.05 |
| E1 | GPM2 | 2B | AX.89359231 | 4.67E+04 | 0.27 | -659.01  | 3.14 | 0.05 |
| E1 | GPM2 | 2B | AX.89641351 | 3.69E+05 | 0.27 | -659.01  | 3.14 | 0.05 |
| E1 | GPM2 | 2B | AX.89338392 | 7.90E+08 | 0.12 | -1036.92 | 3.99 | 0.07 |
| E1 | TKW  | 2B | AX.89677248 | 7.08E+08 | 0.37 | 0.93     | 3.47 | 0.06 |
| E1 | GY   | 2B | AX.89627218 | 7.64E+08 | 0.12 | -3.88    | 3.59 | 0.07 |
| E1 | GPM2 | 2B | AX.89386320 | 4.52E+04 | 0.27 | -659.01  | 3.14 | 0.05 |
| E1 | TKW  | 2B | AX.89688417 | 7.43E+08 | 0.36 | 0.88     | 3.09 | 0.05 |
| E1 | TKW  | 2B | AX.89450083 | 6.91E+08 | 0.28 | 0.99     | 3.42 | 0.06 |
| E1 | TKW  | 2B | AX.89452566 | 7.68E+08 | 0.40 | -0.85    | 3.07 | 0.05 |
| E1 | GY   | 2B | AX.89726785 | 6.62E+08 | 0.06 | -5.29    | 3.43 | 0.05 |
| E1 | TKW  | 2B | AX.89661678 | 1.90E+07 | 0.36 | 0.87     | 3.08 | 0.05 |
| E1 | TKW  | 2B | AX.89768058 | 1.90E+07 | 0.35 | 0.89     | 3.17 | 0.05 |
| E1 | GY   | 2B | AX.89579357 | 1.83E+08 | 0.14 | -3.82    | 3.99 | 0.07 |
| E1 | TKW  | 2B | AX.89534242 | 7.42E+08 | 0.18 | -1.12    | 3.21 | 0.05 |
| E1 | TKW  | 2B | AX.89522387 | 7.18E+08 | 0.28 | 0.96     | 3.20 | 0.06 |
| E1 | TKW  | 2B | AX.89639712 | 7.65E+08 | 0.24 | -1.06    | 3.52 | 0.06 |
| E1 | GY   | 2B | AX.89684472 | 1.81E+08 | 0.12 | -3.87    | 3.68 | 0.07 |
| E1 | TKW  | 2B | AX.89771525 | 6.94E+08 | 0.37 | 0.89     | 3.18 | 0.05 |
| E1 | TKW  | 2B | AX.89400493 | 7.19E+08 | 0.29 | 0.97     | 3.35 | 0.06 |
| E1 | TKW  | 2B | AX.89462410 | 7.38E+08 | 0.37 | 0.86     | 3.03 | 0.05 |
| E1 | GY   | 2B | AX.89750857 | 1.81E+08 | 0.11 | -3.88    | 3.48 | 0.06 |
| E1 | TKW  | 2B | AX.89556952 | 2.42E+07 | 0.46 | 0.97     | 3.88 | 0.07 |
| E1 | TKW  | 2B | AX.89661546 | 5.94E+08 | 0.32 | 0.96     | 3.44 | 0.06 |
| E1 | GPM2 | 2B | AX.89447263 | 5.15E+05 | 0.27 | -659.01  | 3.14 | 0.05 |
| E1 | TKW  | 2B | AX.89573057 | 7.44E+08 | 0.36 | 0.87     | 3.07 | 0.05 |
| E1 | TKW  | 2B | AX.89383653 | 6.02E+08 | 0.38 | 1.00     | 3.93 | 0.07 |
| E1 | GPM2 | 2B | AX.89719172 | 3.65E+05 | 0.27 | -659.01  | 3.14 | 0.05 |
| E1 | GY   | 2B | AX.89558016 | 1.84E+08 | 0.14 | -3.82    | 3.99 | 0.07 |
| E1 | TKW  | 2B | AX.89652950 | 5.94E+08 | 0.32 | 0.96     | 3.44 | 0.06 |
| E1 | TKW  | 2B | AX.89593167 | 7.44E+08 | 0.36 | 0.90     | 3.21 | 0.06 |
| E1 | TKW  | 2B | AX.89491975 | 7.15E+08 | 0.07 | -1.80    | 3.38 | 0.06 |
| E1 | TKW  | 2B | AX.89429731 | 7.44E+08 | 0.37 | 0.90     | 3.24 | 0.06 |
| E1 | TKW  | 2B | AX.89633106 | 7.89E+08 | 0.10 | -1.41    | 3.05 | 0.05 |
| E1 | TKW  | 2B | AX.89531301 | 7.38E+08 | 0.36 | 0.90     | 3.21 | 0.06 |
| E1 | TKW  | 2B | AX.89675483 | 2.82E+08 | 0.21 | -1.07    | 3.33 | 0.06 |
| E1 | TKW  | 2B | AX.89533376 | 7.65E+08 | 0.37 | -0.86    | 3.01 | 0.05 |
| E1 | GY   | 2B | AX.89718685 | 1.82E+08 | 0.13 | -4.62    | 5.44 | 0.10 |
| E1 | TKW  | 2B | AX.89602749 | 7.64E+08 | 0.24 | -1.06    | 3.52 | 0.06 |
| E1 | GY   | 2B | AX.89588768 | 6.60E+08 | 0.06 | -5.29    | 3.43 | 0.05 |
| E1 | TKW  | 2B | AX.89616056 | 5.94E+08 | 0.32 | 0.96     | 3.44 | 0.06 |
| E1 | TKW  | 2B | AX.89732849 | 7.16E+08 | 0.28 | 0.95     | 3.20 | 0.06 |
| E1 | TKW  | 2B | AX.89751944 | 7.57E+08 | 0.35 | 0.92     | 3.34 | 0.06 |

|    |     |    |             |          |      |       |      |      |
|----|-----|----|-------------|----------|------|-------|------|------|
| E1 | TKW | 2B | AX.89679046 | 7.44E+08 | 0.37 | 0.90  | 3.24 | 0.06 |
| E1 | TKW | 2B | AX.89418966 | 7.98E+08 | 0.05 | -2.00 | 3.34 | 0.06 |
| E1 | TKW | 2B | AX.89696810 | 7.09E+08 | 0.40 | 1.01  | 4.10 | 0.07 |
| E1 | TKW | 2B | AX.89435065 | 6.74E+08 | 0.26 | 0.95  | 3.03 | 0.05 |
| E1 | TKW | 2B | AX.89761668 | 5.94E+08 | 0.32 | 0.96  | 3.44 | 0.06 |
| E1 | TKW | 2B | AX.89615317 | 7.65E+08 | 0.37 | -0.86 | 3.01 | 0.05 |
| E1 | TKW | 2B | AX.89624401 | 7.89E+08 | 0.07 | -2.11 | 4.45 | 0.08 |
| E1 | TKW | 2B | AX.89553116 | 7.37E+08 | 0.36 | 0.90  | 3.21 | 0.06 |
| E1 | TKW | 2B | AX.89406449 | 2.82E+08 | 0.22 | -1.11 | 3.61 | 0.07 |
| E1 | TKW | 2B | AX.89328414 | 7.64E+08 | 0.24 | -1.06 | 3.52 | 0.06 |
| E1 | TKW | 2B | AX.89554098 | 7.10E+08 | 0.40 | 0.97  | 3.78 | 0.07 |
| E1 | TKW | 2B | AX.89532521 | 7.65E+08 | 0.24 | -1.06 | 3.52 | 0.06 |
| E1 | TKW | 2B | AX.89391731 | 6.01E+08 | 0.35 | 0.88  | 3.12 | 0.05 |
| E1 | TKW | 2B | AX.89676427 | 6.94E+08 | 0.27 | 0.93  | 3.03 | 0.05 |
| E1 | TKW | 2B | AX.89345738 | 7.45E+08 | 0.50 | 0.89  | 3.37 | 0.06 |
| E1 | GY  | 2B | AX.89537259 | 1.01E+08 | 0.07 | -4.61 | 3.07 | 0.06 |
| E1 | TKW | 2B | AX.89417163 | 7.68E+08 | 0.40 | -0.85 | 3.07 | 0.05 |
| E1 | TKW | 2B | AX.89613561 | 7.46E+08 | 0.49 | 0.91  | 3.53 | 0.06 |
| E1 | TKW | 2B | AX.89418162 | 7.19E+08 | 0.29 | 0.97  | 3.35 | 0.06 |
| E1 | TKW | 2B | AX.89590942 | 7.43E+08 | 0.36 | 0.90  | 3.21 | 0.06 |
| E1 | TKW | 2B | AX.89340885 | 5.94E+08 | 0.32 | 0.96  | 3.44 | 0.06 |
| E1 | TKW | 2B | AX.89679759 | 7.98E+08 | 0.06 | -1.80 | 3.20 | 0.05 |
| E1 | TKW | 2B | AX.89753037 | 7.10E+08 | 0.40 | 0.88  | 3.20 | 0.06 |
| E1 | TKW | 2B | AX.89762444 | 7.03E+08 | 0.38 | 0.94  | 3.51 | 0.06 |
| E1 | TKW | 2B | AX.89515639 | 5.95E+08 | 0.32 | 1.01  | 3.76 | 0.07 |
| E1 | TKW | 2B | AX.89723481 | 5.94E+08 | 0.33 | 0.96  | 3.44 | 0.06 |
| E1 | TKW | 2B | AX.89657622 | 7.19E+08 | 0.28 | 0.96  | 3.20 | 0.06 |
| E1 | GY  | 2B | AX.89618714 | 1.03E+08 | 0.07 | -4.61 | 3.07 | 0.06 |
| E1 | TKW | 2B | AX.89753690 | 7.44E+08 | 0.37 | 0.88  | 3.12 | 0.05 |
| E1 | TKW | 2B | AX.89329425 | 6.73E+08 | 0.33 | 0.99  | 3.68 | 0.07 |
| E1 | TKW | 2B | AX.89563683 | 1.89E+07 | 0.36 | 0.92  | 3.37 | 0.06 |
| E1 | TKW | 2B | AX.89619779 | 7.15E+08 | 0.07 | -1.80 | 3.38 | 0.06 |
| E1 | TKW | 2B | AX.89345607 | 7.65E+08 | 0.24 | -1.06 | 3.52 | 0.06 |
| E1 | TKW | 2B | AX.89356319 | 7.46E+08 | 0.49 | 0.91  | 3.53 | 0.06 |
| E1 | TKW | 2B | AX.89338402 | 7.19E+08 | 0.30 | 0.91  | 3.05 | 0.05 |
| E1 | TKW | 2B | AX.89556917 | 7.65E+08 | 0.24 | -1.06 | 3.52 | 0.06 |
| E1 | TKW | 2B | AX.89631447 | 7.18E+08 | 0.29 | 0.97  | 3.35 | 0.06 |
| E1 | TKW | 2B | AX.89403372 | 7.38E+08 | 0.36 | 0.90  | 3.21 | 0.06 |
| E1 | TKW | 2B | AX.89335723 | 7.18E+08 | 0.29 | 0.97  | 3.35 | 0.06 |
| E1 | TKW | 2B | AX.89745821 | 7.44E+08 | 0.37 | 0.90  | 3.24 | 0.06 |
| E1 | TKW | 2B | AX.89608836 | 7.89E+08 | 0.07 | -2.11 | 4.45 | 0.08 |
| E1 | GY  | 2B | AX.89696341 | 7.59E+08 | 0.06 | -4.77 | 3.07 | 0.05 |
| E1 | TKW | 2B | AX.89515768 | 7.19E+08 | 0.28 | 0.95  | 3.20 | 0.06 |
| E1 | TKW | 2B | AX.89475785 | 2.53E+07 | 0.41 | 0.86  | 3.11 | 0.05 |
| E1 | TKW | 2B | AX.89414376 | 2.42E+07 | 0.45 | 0.97  | 3.93 | 0.07 |
| E1 | TKW | 2B | AX.89338197 | 7.65E+08 | 0.24 | -1.06 | 3.52 | 0.06 |
| E1 | TKW | 2B | AX.89594259 | 6.94E+08 | 0.28 | 0.94  | 3.07 | 0.05 |
| E1 | TKW | 2B | AX.89634429 | 7.41E+08 | 0.39 | 0.88  | 3.17 | 0.05 |
| E1 | TKW | 2B | AX.89322589 | 7.14E+08 | 0.28 | 0.94  | 3.11 | 0.05 |
| E1 | TKW | 2B | AX.89391193 | 7.34E+08 | 0.36 | 0.90  | 3.21 | 0.06 |

|    |      |    |             |          |      |         |      |      |
|----|------|----|-------------|----------|------|---------|------|------|
| E1 | GY   | 2B | AX.89497642 | 1.82E+08 | 0.12 | -4.25   | 4.19 | 0.08 |
| E1 | TKW  | 2B | AX.89385040 | 7.44E+08 | 0.37 | 0.90    | 3.24 | 0.06 |
| E1 | TKW  | 2B | AX.89669637 | 7.64E+08 | 0.24 | -1.06   | 3.52 | 0.06 |
| E1 | TKW  | 2B | AX.89376641 | 1.89E+07 | 0.36 | 0.89    | 3.18 | 0.06 |
| E1 | TKW  | 2B | AX.89772344 | 7.68E+08 | 0.40 | -0.85   | 3.07 | 0.05 |
| E1 | TKW  | 2B | AX.89340151 | 7.43E+08 | 0.38 | 0.86    | 3.06 | 0.05 |
| E1 | TKW  | 2B | AX.89769642 | 6.74E+08 | 0.33 | 0.99    | 3.68 | 0.07 |
| E1 | TKW  | 2B | AX.89359515 | 5.94E+08 | 0.33 | 0.91    | 3.15 | 0.05 |
| E1 | TKW  | 2B | AX.89380713 | 7.38E+08 | 0.36 | 0.90    | 3.21 | 0.06 |
| E1 | TKW  | 2B | AX.89707286 | 6.91E+08 | 0.27 | 0.96    | 3.14 | 0.05 |
| E1 | TKW  | 2B | AX.89682070 | 7.06E+08 | 0.41 | 0.87    | 3.18 | 0.05 |
| E1 | TKW  | 2B | AX.89724284 | 7.08E+08 | 0.36 | 0.92    | 3.34 | 0.06 |
| E1 | TKW  | 2B | AX.89726836 | 2.82E+08 | 0.21 | -1.09   | 3.40 | 0.06 |
| E1 | GPM2 | 2B | AX.89490236 | 4.74E+04 | 0.27 | -659.01 | 3.14 | 0.05 |
| E1 | TKW  | 2B | AX.89362541 | 7.97E+08 | 0.07 | -2.01   | 4.34 | 0.08 |
| E1 | TKW  | 2B | AX.89637526 | 1.90E+07 | 0.35 | 0.89    | 3.17 | 0.05 |
| E1 | TKW  | 2B | AX.89749179 | 2.42E+07 | 0.46 | 0.97    | 3.88 | 0.07 |
| E1 | TKW  | 2B | AX.89735631 | 6.02E+08 | 0.38 | 1.00    | 3.93 | 0.07 |
| E1 | TKW  | 2B | AX.89548333 | 7.09E+08 | 0.45 | 0.92    | 3.55 | 0.06 |
| E1 | TKW  | 2B | AX.89463337 | 7.06E+08 | 0.41 | 0.87    | 3.18 | 0.05 |
| E1 | TKW  | 2B | AX.89686435 | 7.65E+08 | 0.23 | -1.07   | 3.46 | 0.06 |
| E1 | TKW  | 2B | AX.89549868 | 7.10E+08 | 0.40 | 0.88    | 3.22 | 0.06 |
| E1 | GY   | 2B | AX.89708086 | 1.84E+08 | 0.14 | -3.82   | 3.99 | 0.07 |
| E1 | TKW  | 2B | AX.89624820 | 7.64E+08 | 0.24 | -1.08   | 3.59 | 0.06 |
| E1 | TKW  | 2B | AX.89727986 | 7.97E+08 | 0.07 | -2.01   | 4.34 | 0.08 |
| E1 | TKW  | 2B | AX.89430323 | 7.68E+08 | 0.40 | -0.85   | 3.07 | 0.05 |
| E1 | TKW  | 2B | AX.89652699 | 7.65E+08 | 0.24 | -1.06   | 3.52 | 0.06 |
| E1 | TKW  | 2B | AX.89757336 | 7.42E+08 | 0.21 | -1.04   | 3.18 | 0.05 |
| E1 | TKW  | 2B | AX.89502034 | 6.96E+08 | 0.28 | 0.93    | 3.02 | 0.05 |
| E1 | TKW  | 2B | AX.89533402 | 5.21E+08 | 0.09 | -1.67   | 3.93 | 0.07 |
| E1 | TKW  | 2B | AX.89550733 | 7.47E+08 | 0.07 | -1.90   | 3.92 | 0.07 |
| E1 | GPM2 | 2B | AX.89454401 | 7.84E+08 | 0.30 | -757.68 | 4.16 | 0.07 |
| E1 | GPM2 | 2B | AX.89504442 | 7.73E+08 | 0.20 | 762.71  | 3.39 | 0.06 |
| E1 | TKW  | 2B | AX.89395504 | 6.34E+08 | 0.28 | 0.97    | 3.25 | 0.06 |
| E1 | TKW  | 2B | AX.89540537 | 2.42E+07 | 0.46 | 0.97    | 3.88 | 0.07 |
| E1 | TKW  | 2B | AX.89316432 | 7.37E+08 | 0.36 | 0.90    | 3.21 | 0.06 |
| E1 | TKW  | 2B | AX.89500925 | 7.80E+08 | 0.09 | -1.58   | 3.59 | 0.06 |
| E1 | TKW  | 2B | AX.89560674 | 6.73E+08 | 0.32 | 0.94    | 3.32 | 0.06 |
| E1 | TKW  | 2B | AX.89403850 | 7.11E+08 | 0.40 | 0.97    | 3.78 | 0.07 |
| E1 | TKW  | 2B | AX.89644872 | 7.38E+08 | 0.37 | 0.86    | 3.01 | 0.05 |
| E1 | TKW  | 2B | AX.89450884 | 5.95E+08 | 0.31 | 0.96    | 3.38 | 0.06 |
| E1 | TKW  | 2B | AX.89624118 | 2.45E+07 | 0.45 | 0.94    | 3.71 | 0.06 |
| E1 | TKW  | 2B | AX.89550482 | 7.98E+08 | 0.06 | -1.95   | 3.67 | 0.06 |
| E1 | TKW  | 2B | AX.89568935 | 5.94E+08 | 0.32 | 0.96    | 3.44 | 0.06 |
| E1 | TKW  | 2B | AX.89398799 | 6.08E+08 | 0.36 | 1.06    | 4.28 | 0.07 |
| E1 | TKW  | 2B | AX.89458271 | 5.94E+08 | 0.32 | 0.96    | 3.44 | 0.06 |
| E1 | TKW  | 2B | AX.89489593 | 7.65E+08 | 0.36 | -0.90   | 3.23 | 0.05 |
| E1 | GY   | 2B | AX.89579357 | 1.83E+08 | 0.14 | -3.82   | 3.99 | 0.07 |
| E1 | GY   | 2B | AX.89386320 | 4.52E+04 | 0.27 | -2.52   | 3.01 | 0.04 |
| E1 | TKW  | 2B | AX.89507634 | 7.89E+08 | 0.07 | -2.11   | 4.45 | 0.08 |

|    |      |    |             |          |      |        |      |      |
|----|------|----|-------------|----------|------|--------|------|------|
| E1 | TKW  | 2B | AX.89682088 | 6.94E+08 | 0.37 | 0.89   | 3.18 | 0.05 |
| E1 | TKW  | 2B | AX.89322798 | 7.65E+08 | 0.24 | -1.06  | 3.52 | 0.06 |
| E1 | TKW  | 2B | AX.89626720 | 2.49E+07 | 0.33 | 0.92   | 3.26 | 0.05 |
| E1 | TKW  | 2B | AX.89710581 | 7.64E+08 | 0.24 | -1.06  | 3.52 | 0.06 |
| E1 | TKW  | 2B | AX.89351738 | 6.74E+08 | 0.33 | 0.99   | 3.68 | 0.07 |
| E1 | TKW  | 2B | AX.89503580 | 7.43E+08 | 0.36 | 0.90   | 3.21 | 0.06 |
| E1 | TKW  | 2B | AX.89686633 | 5.94E+08 | 0.32 | 0.96   | 3.44 | 0.06 |
| E1 | TKW  | 2B | AX.89745453 | 7.65E+08 | 0.36 | -0.90  | 3.23 | 0.05 |
| E1 | TKW  | 2B | AX.89427256 | 7.06E+08 | 0.41 | 0.87   | 3.18 | 0.05 |
| E1 | TKW  | 2B | AX.89585973 | 6.15E+08 | 0.33 | 0.97   | 3.52 | 0.06 |
| E1 | TKW  | 2B | AX.89399434 | 6.97E+08 | 0.42 | 0.89   | 3.32 | 0.06 |
| E1 | TKW  | 2B | AX.89361908 | 1.90E+07 | 0.36 | 0.87   | 3.08 | 0.05 |
| E1 | TKW  | 2B | AX.89417089 | 7.37E+08 | 0.37 | 0.88   | 3.13 | 0.05 |
| E1 | GY   | 2B | AX.89393166 | 7.57E+08 | 0.07 | -5.13  | 3.90 | 0.06 |
| E1 | TKW  | 2B | AX.89728064 | 9.03E+07 | 0.09 | 1.45   | 3.10 | 0.05 |
| E1 | TKW  | 2B | AX.89696530 | 3.83E+07 | 0.15 | 1.31   | 3.79 | 0.05 |
| E1 | TKW  | 2B | AX.89333824 | 6.94E+08 | 0.37 | 0.92   | 3.38 | 0.06 |
| E1 | TKW  | 2B | AX.89501127 | 3.70E+07 | 0.13 | 1.28   | 3.11 | 0.05 |
| E1 | TKW  | 2B | AX.89498540 | 2.82E+08 | 0.22 | -1.11  | 3.61 | 0.07 |
| E1 | TKW  | 2B | AX.89640514 | 2.45E+07 | 0.45 | 0.94   | 3.71 | 0.06 |
| E1 | TKW  | 2B | AX.89673994 | 1.89E+07 | 0.36 | 0.89   | 3.18 | 0.06 |
| E1 | TKW  | 2B | AX.89676429 | 5.94E+08 | 0.32 | 0.96   | 3.44 | 0.06 |
| E1 | TKW  | 2B | AX.89334693 | 7.64E+08 | 0.24 | -1.06  | 3.52 | 0.06 |
| E1 | TKW  | 2B | AX.89748080 | 7.19E+08 | 0.28 | 0.95   | 3.20 | 0.06 |
| E1 | TKW  | 2B | AX.89586311 | 7.65E+08 | 0.24 | -1.06  | 3.52 | 0.06 |
| E1 | TKW  | 2B | AX.89727367 | 1.89E+07 | 0.36 | 0.89   | 3.18 | 0.06 |
| E1 | TKW  | 2B | AX.89566096 | 7.88E+08 | 0.06 | -1.87  | 3.41 | 0.06 |
| E1 | TKW  | 2B | AX.89768931 | 7.65E+08 | 0.24 | -1.06  | 3.52 | 0.06 |
| E1 | TKW  | 2B | AX.89333155 | 7.38E+08 | 0.34 | 0.90   | 3.15 | 0.05 |
| E1 | TKW  | 2B | AX.89529518 | 5.94E+08 | 0.32 | 0.96   | 3.44 | 0.06 |
| E1 | TKW  | 2B | AX.89476254 | 7.16E+08 | 0.28 | 0.96   | 3.20 | 0.06 |
| E1 | TKW  | 2B | AX.89597215 | 1.89E+07 | 0.37 | 0.91   | 3.31 | 0.06 |
| E1 | TKW  | 2B | AX.89362204 | 7.65E+08 | 0.24 | -1.06  | 3.52 | 0.06 |
| E1 | TKW  | 2B | AX.89588122 | 7.65E+08 | 0.36 | -0.90  | 3.23 | 0.05 |
| E1 | TKW  | 2B | AX.89608778 | 2.43E+07 | 0.45 | 0.97   | 3.93 | 0.07 |
| E1 | TKW  | 2B | AX.89720857 | 2.45E+07 | 0.43 | 0.84   | 3.05 | 0.05 |
| E1 | TKW  | 2B | AX.89317686 | 7.18E+08 | 0.28 | 0.96   | 3.20 | 0.06 |
| E1 | TKW  | 2B | AX.89430844 | 5.94E+08 | 0.33 | 0.96   | 3.44 | 0.06 |
| E1 | TKW  | 2B | AX.89315115 | 2.42E+07 | 0.46 | 0.97   | 3.88 | 0.07 |
| E1 | TKW  | 2B | AX.89428712 | 2.43E+07 | 0.45 | 1.00   | 4.15 | 0.07 |
| E2 | GY   | 2B | AX.89539161 | 1.82E+08 | 0.13 | -4.02  | 5.87 | 0.09 |
| E2 | SPM2 | 2B | AX.89521803 | 1.21E+07 | 0.12 | 18.12  | 3.12 | 0.05 |
| E2 | GY   | 2B | AX.89573578 | 5.93E+08 | 0.06 | -4.54  | 3.80 | 0.07 |
| E2 | GY   | 2B | AX.89573578 | 5.93E+08 | 0.06 | -4.54  | 3.80 | 0.07 |
| E2 | SPM2 | 2B | AX.89756971 | 1.69E+07 | 0.49 | -13.08 | 3.71 | 0.06 |
| E2 | GY   | 2B | AX.89682796 | 1.84E+08 | 0.09 | -3.41  | 3.22 | 0.05 |
| E2 | SPM2 | 2B | AX.89754101 | 7.48E+08 | 0.05 | 28.05  | 3.37 | 0.06 |
| E2 | GY   | 2B | AX.89351791 | 1.83E+08 | 0.14 | -3.11  | 3.81 | 0.06 |
| E2 | SPM2 | 2B | AX.89658601 | 1.89E+07 | 0.20 | 15.02  | 3.21 | 0.05 |
| E2 | GY   | 2B | AX.89634458 | 1.79E+08 | 0.19 | -2.80  | 4.02 | 0.06 |

|    |      |    |             |          |      |        |      |      |
|----|------|----|-------------|----------|------|--------|------|------|
| E2 | GY   | 2B | AX.89696744 | 1.79E+08 | 0.19 | -2.80  | 4.02 | 0.06 |
| E2 | GY   | 2B | AX.89352110 | 1.29E+08 | 0.25 | -2.20  | 3.12 | 0.05 |
| E2 | GY   | 2B | AX.89352110 | 1.29E+08 | 0.25 | -2.20  | 3.12 | 0.05 |
| E2 | SPM2 | 2B | AX.89519465 | 7.86E+08 | 0.05 | 28.90  | 3.55 | 0.06 |
| E2 | GY   | 2B | AX.89400251 | 7.59E+08 | 0.06 | -3.99  | 3.11 | 0.04 |
| E2 | SPM2 | 2B | AX.89540507 | 7.48E+08 | 0.05 | 28.05  | 3.37 | 0.06 |
| E2 | GY   | 2B | AX.89745228 | 1.22E+08 | 0.25 | -2.18  | 3.04 | 0.05 |
| E2 | GY   | 2B | AX.89570875 | 1.43E+08 | 0.25 | -2.18  | 3.05 | 0.05 |
| E2 | GY   | 2B | AX.89570875 | 1.43E+08 | 0.25 | -2.18  | 3.05 | 0.05 |
| E2 | SPM2 | 2B | AX.86169748 | 1.82E+07 | 0.48 | -12.26 | 3.32 | 0.05 |
| E2 | SPM2 | 2B | AX.89483069 | 1.82E+07 | 0.48 | -12.60 | 3.48 | 0.05 |
| E2 | GY   | 2B | AX.89469521 | 1.83E+08 | 0.14 | -3.55  | 4.92 | 0.08 |
| E2 | SPM2 | 2B | AX.89566909 | 1.76E+07 | 0.38 | 12.30  | 3.18 | 0.05 |
| E2 | GY   | 2B | AX.89575499 | 6.63E+08 | 0.06 | -4.94  | 4.16 | 0.06 |
| E2 | GY   | 2B | AX.89575499 | 6.63E+08 | 0.06 | -4.94  | 4.16 | 0.06 |
| E2 | GY   | 2B | AX.89330672 | 6.60E+08 | 0.07 | -4.01  | 3.30 | 0.04 |
| E2 | GY   | 2B | AX.89436572 | 1.82E+08 | 0.13 | -3.57  | 4.64 | 0.07 |
| E2 | SPM2 | 2B | AX.89445580 | 1.89E+07 | 0.20 | 15.02  | 3.21 | 0.05 |
| E2 | GY   | 2B | AX.89575757 | 1.80E+08 | 0.19 | -2.80  | 4.02 | 0.06 |
| E2 | GY   | 2B | AX.89331026 | 1.53E+08 | 0.06 | -4.16  | 3.10 | 0.05 |
| E2 | SPM2 | 2B | AX.89454978 | 6.56E+08 | 0.10 | -20.40 | 3.25 | 0.05 |
| E2 | GY   | 2B | AX.89470748 | 6.62E+08 | 0.06 | -5.79  | 5.90 | 0.09 |
| E2 | GY   | 2B | AX.89541454 | 1.79E+08 | 0.20 | -2.79  | 4.07 | 0.07 |
| E2 | GY   | 2B | AX.89541454 | 1.79E+08 | 0.20 | -2.79  | 4.07 | 0.07 |
| E2 | SPM2 | 2B | AX.89762454 | 1.29E+07 | 0.14 | 17.53  | 3.27 | 0.06 |
| E2 | GY   | 2B | AX.89564994 | 1.81E+08 | 0.11 | -3.62  | 4.24 | 0.07 |
| E2 | GY   | 2B | AX.89541694 | 1.40E+08 | 0.13 | -3.15  | 3.65 | 0.06 |
| E2 | SPM2 | 2B | AX.89680341 | 7.47E+08 | 0.05 | 28.05  | 3.37 | 0.06 |
| E2 | GY   | 2B | AX.89402018 | 1.76E+08 | 0.18 | -3.40  | 5.31 | 0.09 |
| E2 | GY   | 2B | AX.89507024 | 6.62E+08 | 0.06 | -4.41  | 3.40 | 0.04 |
| E2 | GY   | 2B | AX.89507172 | 1.79E+08 | 0.20 | -3.16  | 5.03 | 0.08 |
| E2 | SPM2 | 2B | AX.89678258 | 1.89E+07 | 0.20 | 15.02  | 3.21 | 0.05 |
| E2 | GY   | 2B | AX.89612967 | 6.61E+08 | 0.06 | -5.03  | 4.29 | 0.06 |
| E2 | GY   | 2B | AX.89437310 | 5.64E+08 | 0.11 | -3.20  | 3.30 | 0.04 |
| E2 | SPM2 | 2B | AX.89608908 | 1.82E+07 | 0.48 | -12.60 | 3.48 | 0.05 |
| E2 | GY   | 2B | AX.89331795 | 1.79E+08 | 0.20 | -2.93  | 4.48 | 0.07 |
| E2 | SPM2 | 2B | AX.89766607 | 7.48E+08 | 0.05 | 28.05  | 3.37 | 0.06 |
| E2 | SPM2 | 2B | AX.89494773 | 1.89E+07 | 0.20 | 15.02  | 3.21 | 0.05 |
| E2 | GY   | 2B | AX.89332143 | 1.82E+08 | 0.13 | -4.02  | 5.87 | 0.09 |
| E2 | GY   | 2B | AX.89332143 | 1.82E+08 | 0.13 | -4.02  | 5.87 | 0.09 |
| E2 | GY   | 2B | AX.89650120 | 1.78E+08 | 0.20 | -3.16  | 5.03 | 0.08 |
| E2 | GY   | 2B | AX.89650120 | 1.78E+08 | 0.20 | -3.16  | 5.03 | 0.08 |
| E2 | GY   | 2B | AX.89542438 | 6.64E+08 | 0.05 | -4.64  | 3.48 | 0.05 |
| E2 | GY   | 2B | AX.89472568 | 6.64E+08 | 0.05 | -4.64  | 3.48 | 0.05 |
| E2 | SPM2 | 2B | AX.89471633 | 1.76E+07 | 0.38 | 12.30  | 3.18 | 0.05 |
| E2 | GY   | 2B | AX.89590527 | 1.33E+08 | 0.07 | -4.06  | 3.45 | 0.04 |
| E2 | GY   | 2B | AX.89489589 | 5.86E+08 | 0.06 | -4.54  | 3.80 | 0.07 |
| E2 | GY   | 2B | AX.89768980 | 1.22E+08 | 0.25 | -2.20  | 3.12 | 0.05 |
| E2 | GY   | 2B | AX.89403225 | 1.03E+08 | 0.07 | -4.38  | 4.09 | 0.08 |
| E2 | GY   | 2B | AX.89403225 | 1.03E+08 | 0.07 | -4.38  | 4.09 | 0.08 |

|    |      |    |             |          |      |        |      |      |
|----|------|----|-------------|----------|------|--------|------|------|
| E2 | GY   | 2B | AX.89460927 | 1.79E+08 | 0.19 | -2.80  | 4.02 | 0.06 |
| E2 | SPM2 | 2B | AX.89666169 | 1.59E+08 | 0.07 | 25.80  | 3.54 | 0.06 |
| E2 | GY   | 2B | AX.89500923 | 1.76E+08 | 0.17 | -3.28  | 4.79 | 0.08 |
| E2 | SPM2 | 2B | AX.89619909 | 1.84E+07 | 0.45 | 11.71  | 3.04 | 0.04 |
| E2 | SPM2 | 2B | AX.89404964 | 7.49E+08 | 0.17 | 15.97  | 3.17 | 0.05 |
| E2 | SPM2 | 2B | AX.89705729 | 1.29E+07 | 0.30 | 13.06  | 3.20 | 0.05 |
| E2 | GY   | 2B | AX.89713278 | 5.93E+08 | 0.06 | -4.54  | 3.80 | 0.07 |
| E2 | GY   | 2B | AX.89679762 | 1.43E+08 | 0.25 | -2.18  | 3.05 | 0.05 |
| E2 | GY   | 2B | AX.89555674 | 1.80E+08 | 0.20 | -3.16  | 5.03 | 0.08 |
| E2 | GY   | 2B | AX.89416037 | 1.83E+08 | 0.14 | -3.55  | 4.92 | 0.08 |
| E2 | SPM2 | 2B | AX.89555283 | 7.48E+08 | 0.05 | 28.05  | 3.37 | 0.06 |
| E2 | GY   | 2B | AX.89369437 | 1.22E+08 | 0.25 | -2.32  | 3.39 | 0.05 |
| E2 | GY   | 2B | AX.89369437 | 1.22E+08 | 0.25 | -2.32  | 3.39 | 0.05 |
| E2 | SPM2 | 2B | AX.89580678 | 1.71E+07 | 0.40 | 12.08  | 3.12 | 0.05 |
| E2 | SPM2 | 2B | AX.89446539 | 1.74E+07 | 0.40 | 12.08  | 3.12 | 0.05 |
| E2 | GY   | 2B | AX.89722560 | 1.84E+08 | 0.14 | -3.11  | 3.81 | 0.06 |
| E2 | GY   | 2B | AX.89357145 | 1.80E+08 | 0.19 | -2.80  | 4.02 | 0.06 |
| E2 | GY   | 2B | AX.89552327 | 1.78E+08 | 0.20 | -3.16  | 5.03 | 0.08 |
| E2 | GY   | 2B | AX.89677120 | 1.79E+08 | 0.20 | -2.93  | 4.55 | 0.07 |
| E2 | SPM2 | 2B | AX.89611282 | 7.48E+08 | 0.05 | 28.05  | 3.37 | 0.06 |
| E2 | GY   | 2B | AX.89511482 | 1.83E+08 | 0.13 | -3.18  | 3.87 | 0.06 |
| E2 | GY   | 2B | AX.89511482 | 1.83E+08 | 0.13 | -3.18  | 3.87 | 0.06 |
| E2 | SPM2 | 2B | AX.89722263 | 1.90E+07 | 0.20 | 15.02  | 3.21 | 0.05 |
| E2 | SPM2 | 2B | AX.89449821 | 1.71E+07 | 0.40 | 12.08  | 3.12 | 0.05 |
| E2 | GY   | 2B | AX.89452013 | 1.82E+08 | 0.14 | -3.66  | 5.11 | 0.08 |
| E2 | GY   | 2B | AX.89511784 | 1.19E+08 | 0.24 | -2.19  | 3.01 | 0.05 |
| E2 | GY   | 2B | AX.89545552 | 6.63E+08 | 0.05 | -4.88  | 3.79 | 0.05 |
| E2 | GY   | 2B | AX.89545552 | 6.63E+08 | 0.05 | -4.88  | 3.79 | 0.05 |
| E2 | GY   | 2B | AX.89754603 | 1.22E+08 | 0.25 | -2.18  | 3.04 | 0.05 |
| E2 | SPM2 | 2B | AX.89448941 | 1.71E+07 | 0.39 | 12.72  | 3.39 | 0.05 |
| E2 | GY   | 2B | AX.89690569 | 1.78E+08 | 0.18 | -3.40  | 5.31 | 0.09 |
| E2 | SPM2 | 2B | AX.89355595 | 1.82E+07 | 0.48 | -12.60 | 3.48 | 0.05 |
| E2 | GY   | 2B | AX.89727447 | 1.76E+08 | 0.17 | -3.02  | 4.23 | 0.07 |
| E2 | GY   | 2B | AX.89441347 | 1.79E+08 | 0.19 | -2.80  | 4.02 | 0.06 |
| E2 | SPM2 | 2B | AX.89395502 | 1.89E+07 | 0.20 | 15.02  | 3.21 | 0.05 |
| E2 | GY   | 2B | AX.89406830 | 1.22E+08 | 0.25 | -2.18  | 3.04 | 0.05 |
| E2 | GY   | 2B | AX.89617915 | 1.47E+08 | 0.16 | -2.83  | 3.49 | 0.05 |
| E2 | SPM2 | 2B | AX.89438400 | 1.71E+07 | 0.39 | 13.28  | 3.65 | 0.05 |
| E2 | GY   | 2B | AX.89736400 | 1.82E+08 | 0.13 | -3.57  | 4.64 | 0.07 |
| E2 | SPM2 | 2B | AX.89532288 | 7.86E+08 | 0.05 | 28.90  | 3.55 | 0.06 |
| E2 | GY   | 2B | AX.89407434 | 7.95E+08 | 0.08 | -3.54  | 3.10 | 0.04 |
| E2 | GY   | 2B | AX.89407434 | 7.95E+08 | 0.08 | -3.54  | 3.10 | 0.04 |
| E2 | GY   | 2B | AX.89692003 | 1.76E+08 | 0.17 | -3.02  | 4.23 | 0.07 |
| E2 | GY   | 2B | AX.89336171 | 5.94E+08 | 0.06 | -4.54  | 3.80 | 0.07 |
| E2 | SPM2 | 2B | AX.89574048 | 7.86E+08 | 0.05 | 28.90  | 3.55 | 0.06 |
| E2 | SPM2 | 2B | AX.89702619 | 7.47E+08 | 0.05 | 28.05  | 3.37 | 0.06 |
| E2 | SPM2 | 2B | AX.89384802 | 1.76E+07 | 0.38 | 12.30  | 3.18 | 0.05 |
| E2 | SPM2 | 2B | AX.89338321 | 7.48E+08 | 0.05 | 28.05  | 3.37 | 0.06 |
| E2 | GY   | 2B | AX.89408291 | 1.40E+08 | 0.13 | -3.14  | 3.57 | 0.06 |
| E2 | SPM2 | 2B | AX.89625996 | 1.76E+07 | 0.38 | 12.30  | 3.18 | 0.05 |



|    |      |    |             |          |      |       |      |      |
|----|------|----|-------------|----------|------|-------|------|------|
| E2 | GY   | 2B | AX.89619321 | 1.80E+08 | 0.19 | -2.80 | 4.02 | 0.06 |
| E2 | GY   | 2B | AX.89443676 | 7.58E+08 | 0.06 | -3.99 | 3.11 | 0.04 |
| E2 | SPM2 | 2B | AX.89368784 | 6.23E+08 | 0.23 | 14.06 | 3.11 | 0.05 |
| E2 | GY   | 2B | AX.89583382 | 1.81E+08 | 0.12 | -4.12 | 5.49 | 0.09 |
| E2 | SPM2 | 2B | AX.89612878 | 8.01E+08 | 0.05 | 26.76 | 3.11 | 0.05 |
| E2 | GY   | 2B | AX.89561740 | 6.64E+08 | 0.06 | -5.47 | 5.01 | 0.07 |
| E2 | SPM2 | 2B | AX.89694614 | 1.89E+07 | 0.20 | 14.50 | 3.07 | 0.05 |
| E2 | GY   | 2B | AX.89718685 | 1.82E+08 | 0.13 | -4.02 | 5.87 | 0.09 |
| E2 | GY   | 2B | AX.89710344 | 7.57E+08 | 0.07 | -4.00 | 3.30 | 0.04 |
| E2 | GY   | 2B | AX.89754232 | 1.30E+08 | 0.25 | -2.20 | 3.12 | 0.05 |
| E2 | GY   | 2B | AX.89549272 | 1.34E+08 | 0.06 | -4.89 | 4.26 | 0.05 |
| E2 | GY   | 2B | AX.89549272 | 1.34E+08 | 0.06 | -4.89 | 4.26 | 0.05 |
| E2 | GY   | 2B | AX.89410146 | 1.84E+08 | 0.14 | -3.55 | 4.92 | 0.08 |
| E2 | GY   | 2B | AX.89374293 | 1.02E+08 | 0.07 | -4.38 | 4.09 | 0.08 |
| E2 | GY   | 2B | AX.89374293 | 1.02E+08 | 0.07 | -4.38 | 4.09 | 0.08 |
| E2 | GY   | 2B | AX.89561014 | 5.93E+08 | 0.06 | -4.54 | 3.80 | 0.07 |
| E2 | GY   | 2B | AX.89561014 | 5.93E+08 | 0.06 | -4.54 | 3.80 | 0.07 |
| E2 | GY   | 2B | AX.89410514 | 4.13E+08 | 0.06 | -4.75 | 4.16 | 0.06 |
| E2 | GY   | 2B | AX.89410514 | 4.13E+08 | 0.06 | -4.75 | 4.16 | 0.06 |
| E2 | GY   | 2B | AX.89750857 | 1.81E+08 | 0.11 | -3.62 | 4.24 | 0.07 |
| E2 | GY   | 2B | AX.89750857 | 1.81E+08 | 0.11 | -3.62 | 4.24 | 0.07 |
| E2 | GY   | 2B | AX.89654194 | 1.81E+08 | 0.11 | -3.62 | 4.24 | 0.07 |
| E2 | SPM2 | 2B | AX.89662480 | 1.71E+07 | 0.38 | 12.96 | 3.48 | 0.05 |
| E2 | SPM2 | 2B | AX.89410576 | 1.89E+07 | 0.20 | 15.02 | 3.21 | 0.05 |
| E2 | GY   | 2B | AX.89445883 | 1.83E+08 | 0.14 | -3.11 | 3.81 | 0.06 |
| E2 | SPM2 | 2B | AX.89494078 | 1.74E+07 | 0.40 | 12.08 | 3.12 | 0.05 |
| E2 | GY   | 2B | AX.89434536 | 1.82E+08 | 0.13 | -4.02 | 5.87 | 0.09 |
| E2 | GY   | 2B | AX.89434536 | 1.82E+08 | 0.13 | -4.02 | 5.87 | 0.09 |
| E2 | GY   | 2B | AX.89517124 | 1.48E+08 | 0.16 | -2.85 | 3.58 | 0.05 |
| E2 | GY   | 2B | AX.89517124 | 1.48E+08 | 0.16 | -2.85 | 3.58 | 0.05 |
| E2 | GPS  | 2B | AX.89465814 | 6.60E+08 | 0.16 | -1.79 | 3.03 | 0.04 |
| E2 | GY   | 2B | AX.89375686 | 6.61E+08 | 0.06 | -5.03 | 4.29 | 0.06 |
| E2 | GY   | 2B | AX.89375686 | 6.61E+08 | 0.06 | -5.03 | 4.29 | 0.06 |
| E2 | GY   | 2B | AX.89469035 | 7.60E+08 | 0.06 | -3.99 | 3.11 | 0.04 |
| E2 | GY   | 2B | AX.89469035 | 7.60E+08 | 0.06 | -3.99 | 3.11 | 0.04 |
| E2 | GY   | 2B | AX.89729189 | 1.83E+08 | 0.14 | -3.55 | 4.92 | 0.08 |
| E2 | GY   | 2B | AX.89729189 | 1.83E+08 | 0.14 | -3.55 | 4.92 | 0.08 |
| E2 | GY   | 2B | AX.89376677 | 1.82E+08 | 0.13 | -4.02 | 5.87 | 0.09 |
| E2 | GY   | 2B | AX.89376677 | 1.82E+08 | 0.13 | -4.02 | 5.87 | 0.09 |
| E2 | GY   | 2B | AX.89551447 | 1.75E+08 | 0.18 | -3.40 | 5.31 | 0.09 |
| E2 | GY   | 2B | AX.89551447 | 1.75E+08 | 0.18 | -3.40 | 5.31 | 0.09 |
| E2 | GY   | 2B | AX.89647344 | 7.59E+08 | 0.06 | -3.99 | 3.11 | 0.04 |
| E2 | GY   | 2B | AX.89647344 | 7.59E+08 | 0.06 | -3.99 | 3.11 | 0.04 |
| E2 | GY   | 2B | AX.89483565 | 6.62E+08 | 0.06 | -5.03 | 4.29 | 0.06 |
| E2 | GY   | 2B | AX.89483565 | 6.62E+08 | 0.06 | -5.03 | 4.29 | 0.06 |
| E2 | GY   | 2B | AX.89413015 | 6.59E+08 | 0.06 | -5.03 | 4.29 | 0.06 |
| E2 | GY   | 2B | AX.89413015 | 6.59E+08 | 0.06 | -5.03 | 4.29 | 0.06 |
| E2 | GY   | 2B | AX.86167754 | 1.28E+08 | 0.06 | -4.89 | 4.26 | 0.05 |
| E2 | GY   | 2B | AX.86167754 | 1.28E+08 | 0.06 | -4.89 | 4.26 | 0.05 |
| E2 | GY   | 2B | AX.89673041 | 6.59E+08 | 0.06 | -5.03 | 4.29 | 0.06 |

|    |      |    |             |          |      |          |      |      |
|----|------|----|-------------|----------|------|----------|------|------|
| E2 | GY   | 2B | AX.89673041 | 6.59E+08 | 0.06 | -5.03    | 4.29 | 0.06 |
| E2 | GY   | 2B | AX.89730024 | 1.82E+08 | 0.13 | -4.02    | 5.87 | 0.09 |
| E2 | GY   | 2B | AX.89730024 | 1.82E+08 | 0.13 | -4.02    | 5.87 | 0.09 |
| E2 | GY   | 2B | AX.89458240 | 1.82E+08 | 0.13 | -3.57    | 4.64 | 0.07 |
| E2 | GY   | 2B | AX.89341825 | 1.02E+08 | 0.07 | -4.38    | 4.09 | 0.08 |
| E2 | GY   | 2B | AX.89341825 | 1.02E+08 | 0.07 | -4.38    | 4.09 | 0.08 |
| E2 | GY   | 2B | AX.89734127 | 7.59E+08 | 0.05 | -5.13    | 4.22 | 0.05 |
| E2 | GY   | 2B | AX.89734127 | 7.59E+08 | 0.05 | -5.13    | 4.22 | 0.05 |
| E2 | GY   | 2B | AX.89734149 | 7.57E+08 | 0.06 | -3.99    | 3.11 | 0.04 |
| E2 | GY   | 2B | AX.89734149 | 7.57E+08 | 0.06 | -3.99    | 3.11 | 0.04 |
| E2 | GY   | 2B | AX.89518723 | 1.80E+08 | 0.19 | -2.80    | 4.02 | 0.06 |
| E2 | GY   | 2B | AX.89518723 | 1.80E+08 | 0.19 | -2.80    | 4.02 | 0.06 |
| E2 | GY   | 2B | AX.89342210 | 6.64E+08 | 0.05 | -4.64    | 3.48 | 0.05 |
| E2 | GY   | 2B | AX.89470748 | 6.62E+08 | 0.06 | -5.79    | 5.90 | 0.09 |
| E2 | GY   | 2B | AX.89588628 | 7.59E+08 | 0.06 | -3.99    | 3.11 | 0.04 |
| E2 | GY   | 2B | AX.89588628 | 7.59E+08 | 0.06 | -3.99    | 3.11 | 0.04 |
| E2 | GY   | 2B | AX.89564960 | 1.80E+08 | 0.20 | -3.16    | 5.03 | 0.08 |
| E2 | GY   | 2B | AX.89564960 | 1.80E+08 | 0.20 | -3.16    | 5.03 | 0.08 |
| E2 | GY   | 2B | AX.89771820 | 7.93E+08 | 0.35 | -2.09    | 3.34 | 0.07 |
| E2 | GY   | 2B | AX.89771820 | 7.93E+08 | 0.35 | -2.09    | 3.34 | 0.07 |
| E2 | GY   | 2B | AX.89459151 | 1.31E+08 | 0.25 | -2.18    | 3.04 | 0.05 |
| E2 | GY   | 2B | AX.89459151 | 1.31E+08 | 0.25 | -2.18    | 3.04 | 0.05 |
| E2 | GY   | 2B | AX.89377960 | 7.75E+08 | 0.11 | -3.14    | 3.16 | 0.06 |
| E2 | GY   | 2B | AX.89377960 | 7.75E+08 | 0.11 | -3.14    | 3.16 | 0.06 |
| E2 | GY   | 2B | AX.89342772 | 1.23E+08 | 0.25 | -2.20    | 3.12 | 0.05 |
| E2 | GY   | 2B | AX.89342772 | 1.23E+08 | 0.25 | -2.20    | 3.12 | 0.05 |
| E2 | GY   | 2B | AX.89342802 | 1.82E+08 | 0.12 | -4.12    | 5.49 | 0.09 |
| E2 | GY   | 2B | AX.89342802 | 1.82E+08 | 0.12 | -4.12    | 5.49 | 0.09 |
| E2 | GY   | 2B | AX.86184320 | 1.77E+08 | 0.18 | -3.40    | 5.31 | 0.09 |
| E2 | GY   | 2B | AX.86184320 | 1.77E+08 | 0.18 | -3.40    | 5.31 | 0.09 |
| E2 | GY   | 2B | AX.89459648 | 1.75E+08 | 0.18 | -3.40    | 5.31 | 0.09 |
| E2 | GY   | 2B | AX.89674559 | 8.60E+06 | 0.35 | -2.19    | 3.57 | 0.04 |
| E2 | GY   | 2B | AX.89589720 | 1.02E+08 | 0.07 | -4.38    | 4.09 | 0.08 |
| E2 | GY   | 2B | AX.89589720 | 1.02E+08 | 0.07 | -4.38    | 4.09 | 0.08 |
| E2 | GY   | 2B | AX.89449337 | 1.80E+08 | 0.20 | -2.59    | 3.61 | 0.06 |
| E2 | GY   | 2B | AX.89449337 | 1.80E+08 | 0.20 | -2.59    | 3.61 | 0.06 |
| E2 | GY   | 2B | AX.89343431 | 1.75E+08 | 0.18 | -3.40    | 5.31 | 0.09 |
| E2 | GY   | 2B | AX.89343431 | 1.75E+08 | 0.18 | -3.40    | 5.31 | 0.09 |
| E2 | GPM2 | 2B | AX.89385328 | 9.84E+07 | 0.08 | -1036.75 | 3.92 | 0.07 |
| E2 | GY   | 2B | AX.89460256 | 1.76E+08 | 0.17 | -3.02    | 4.23 | 0.07 |
| E2 | GY   | 2B | AX.89590527 | 1.33E+08 | 0.07 | -4.06    | 3.45 | 0.04 |
| E2 | GY   | 2B | AX.89486060 | 1.80E+08 | 0.20 | -3.16    | 5.03 | 0.08 |
| E2 | GY   | 2B | AX.89486060 | 1.80E+08 | 0.20 | -3.16    | 5.03 | 0.08 |
| E2 | GY   | 2B | AX.89736861 | 6.64E+08 | 0.05 | -4.64    | 3.48 | 0.05 |
| E2 | GY   | 2B | AX.89736861 | 6.64E+08 | 0.05 | -4.64    | 3.48 | 0.05 |
| E2 | GY   | 2B | AX.89727517 | 7.57E+08 | 0.06 | -4.29    | 3.32 | 0.04 |
| E2 | GY   | 2B | AX.89727517 | 7.57E+08 | 0.06 | -4.29    | 3.32 | 0.04 |
| E2 | GY   | 2B | AX.89461227 | 1.22E+08 | 0.25 | -2.18    | 3.04 | 0.05 |
| E2 | GY   | 2B | AX.89391373 | 1.78E+08 | 0.19 | -2.80    | 4.02 | 0.06 |
| E2 | GY   | 2B | AX.89730333 | 1.81E+08 | 0.12 | -3.57    | 4.28 | 0.07 |

|    |     |    |             |          |      |       |      |      |
|----|-----|----|-------------|----------|------|-------|------|------|
| E2 | GY  | 2B | AX.89730333 | 1.81E+08 | 0.12 | -3.57 | 4.28 | 0.07 |
| E2 | GY  | 2B | AX.89691900 | 1.80E+08 | 0.20 | -2.59 | 3.61 | 0.06 |
| E2 | GY  | 2B | AX.89691900 | 1.80E+08 | 0.20 | -2.59 | 3.61 | 0.06 |
| E2 | GY  | 2B | AX.89555674 | 1.80E+08 | 0.20 | -3.16 | 5.03 | 0.08 |
| E2 | TKW | 2B | AX.89501127 | 3.70E+07 | 0.13 | 1.54  | 3.77 | 0.07 |
| E2 | GY  | 2B | AX.89416037 | 1.83E+08 | 0.14 | -3.55 | 4.92 | 0.08 |
| E2 | GY  | 2B | AX.89544169 | 1.22E+08 | 0.25 | -2.18 | 3.04 | 0.05 |
| E2 | GY  | 2B | AX.89544169 | 1.22E+08 | 0.25 | -2.18 | 3.04 | 0.05 |
| E2 | GY  | 2B | AX.89369551 | 1.81E+08 | 0.24 | -2.59 | 4.06 | 0.06 |
| E2 | GY  | 2B | AX.89369551 | 1.81E+08 | 0.24 | -2.59 | 4.06 | 0.06 |
| E2 | GY  | 2B | AX.89474590 | 1.82E+08 | 0.12 | -4.12 | 5.49 | 0.09 |
| E2 | GY  | 2B | AX.89474590 | 1.82E+08 | 0.12 | -4.12 | 5.49 | 0.09 |
| E2 | GY  | 2B | AX.89736105 | 1.48E+08 | 0.17 | -2.87 | 3.72 | 0.06 |
| E2 | GY  | 2B | AX.89736105 | 1.48E+08 | 0.17 | -2.87 | 3.72 | 0.06 |
| E2 | GY  | 2B | AX.89665143 | 1.78E+08 | 0.20 | -3.16 | 5.03 | 0.08 |
| E2 | GY  | 2B | AX.89665143 | 1.78E+08 | 0.20 | -3.16 | 5.03 | 0.08 |
| E2 | GY  | 2B | AX.89771483 | 7.57E+08 | 0.06 | -3.99 | 3.11 | 0.04 |
| E2 | GY  | 2B | AX.89771483 | 7.57E+08 | 0.06 | -3.99 | 3.11 | 0.04 |
| E2 | GY  | 2B | AX.89552651 | 1.81E+08 | 0.12 | -4.12 | 5.49 | 0.09 |
| E2 | GY  | 2B | AX.89552651 | 1.81E+08 | 0.12 | -4.12 | 5.49 | 0.09 |
| E2 | GY  | 2B | AX.89487985 | 1.83E+08 | 0.14 | -3.11 | 3.81 | 0.06 |
| E2 | GY  | 2B | AX.89487985 | 1.83E+08 | 0.14 | -3.11 | 3.81 | 0.06 |
| E2 | GY  | 2B | AX.89451802 | 6.59E+08 | 0.06 | -5.03 | 4.29 | 0.06 |
| E2 | GY  | 2B | AX.89451802 | 6.59E+08 | 0.06 | -5.03 | 4.29 | 0.06 |
| E2 | GY  | 2B | AX.89705102 | 1.58E+08 | 0.08 | -3.47 | 3.09 | 0.05 |
| E2 | GY  | 2B | AX.89705102 | 1.58E+08 | 0.08 | -3.47 | 3.09 | 0.05 |
| E2 | GY  | 2B | AX.89381154 | 7.57E+08 | 0.06 | -4.75 | 3.93 | 0.05 |
| E2 | GY  | 2B | AX.89381154 | 7.57E+08 | 0.06 | -4.75 | 3.93 | 0.05 |
| E2 | GY  | 2B | AX.89312467 | 6.60E+08 | 0.07 | -4.01 | 3.30 | 0.04 |
| E2 | GY  | 2B | AX.89312467 | 6.60E+08 | 0.07 | -4.01 | 3.30 | 0.04 |
| E2 | GY  | 2B | AX.89593197 | 9.71E+06 | 0.22 | -2.52 | 3.55 | 0.05 |
| E2 | GY  | 2B | AX.89593197 | 9.71E+06 | 0.22 | -2.52 | 3.55 | 0.05 |
| E2 | GY  | 2B | AX.89690045 | 1.82E+08 | 0.13 | -4.02 | 5.87 | 0.09 |
| E2 | GY  | 2B | AX.89690045 | 1.82E+08 | 0.13 | -4.02 | 5.87 | 0.09 |
| E2 | GY  | 2B | AX.89628294 | 1.81E+08 | 0.13 | -3.66 | 4.75 | 0.08 |
| E2 | GY  | 2B | AX.89628294 | 1.81E+08 | 0.13 | -3.66 | 4.75 | 0.08 |
| E2 | GY  | 2B | AX.89523462 | 1.84E+08 | 0.13 | -3.16 | 3.75 | 0.06 |
| E2 | GY  | 2B | AX.89523462 | 1.84E+08 | 0.13 | -3.16 | 3.75 | 0.06 |
| E2 | GY  | 2B | AX.89452163 | 1.80E+08 | 0.19 | -2.80 | 4.02 | 0.06 |
| E2 | GY  | 2B | AX.89452163 | 1.80E+08 | 0.19 | -2.80 | 4.02 | 0.06 |
| E2 | GY  | 2B | AX.89381365 | 1.43E+08 | 0.25 | -2.18 | 3.05 | 0.05 |
| E2 | GY  | 2B | AX.89381365 | 1.43E+08 | 0.25 | -2.18 | 3.05 | 0.05 |
| E2 | GY  | 2B | AX.89749678 | 6.59E+08 | 0.06 | -5.03 | 4.29 | 0.06 |
| E2 | GY  | 2B | AX.89749678 | 6.59E+08 | 0.06 | -5.03 | 4.29 | 0.06 |
| E2 | GY  | 2B | AX.89703355 | 1.81E+08 | 0.12 | -4.12 | 5.49 | 0.09 |
| E2 | GY  | 2B | AX.89703355 | 1.81E+08 | 0.12 | -4.12 | 5.49 | 0.09 |
| E2 | GY  | 2B | AX.89534791 | 1.02E+08 | 0.07 | -4.38 | 4.09 | 0.08 |
| E2 | GY  | 2B | AX.89593986 | 1.53E+08 | 0.06 | -4.16 | 3.10 | 0.05 |
| E2 | GY  | 2B | AX.89593986 | 1.53E+08 | 0.06 | -4.16 | 3.10 | 0.05 |
| E2 | GY  | 2B | AX.89417809 | 1.31E+08 | 0.25 | -2.18 | 3.04 | 0.05 |

|    |     |    |             |          |      |       |      |      |
|----|-----|----|-------------|----------|------|-------|------|------|
| E2 | GY  | 2B | AX.89417809 | 1.31E+08 | 0.25 | -2.18 | 3.04 | 0.05 |
| E2 | GY  | 2B | AX.89764413 | 1.83E+08 | 0.14 | -3.11 | 3.81 | 0.06 |
| E2 | GY  | 2B | AX.89764413 | 1.83E+08 | 0.14 | -3.11 | 3.81 | 0.06 |
| E2 | GY  | 2B | AX.89524212 | 1.84E+08 | 0.14 | -2.99 | 3.66 | 0.06 |
| E2 | GY  | 2B | AX.89524212 | 1.84E+08 | 0.14 | -2.99 | 3.66 | 0.06 |
| E2 | GY  | 2B | AX.89703625 | 6.62E+08 | 0.06 | -5.03 | 4.29 | 0.06 |
| E2 | GY  | 2B | AX.89666887 | 1.30E+08 | 0.07 | -5.62 | 5.82 | 0.08 |
| E2 | GY  | 2B | AX.89666887 | 1.30E+08 | 0.07 | -5.62 | 5.82 | 0.08 |
| E2 | GY  | 2B | AX.89558174 | 1.81E+08 | 0.12 | -4.12 | 5.49 | 0.09 |
| E2 | GY  | 2B | AX.89558174 | 1.81E+08 | 0.12 | -4.12 | 5.49 | 0.09 |
| E2 | GY  | 2B | AX.89736400 | 1.82E+08 | 0.13 | -3.57 | 4.64 | 0.07 |
| E2 | GY  | 2B | AX.89325940 | 1.83E+08 | 0.14 | -3.11 | 3.81 | 0.06 |
| E2 | GY  | 2B | AX.89594592 | 1.80E+08 | 0.20 | -3.16 | 5.03 | 0.08 |
| E2 | GY  | 2B | AX.89594592 | 1.80E+08 | 0.20 | -3.16 | 5.03 | 0.08 |
| E2 | GY  | 2B | AX.89418966 | 7.98E+08 | 0.05 | -4.30 | 3.09 | 0.04 |
| E2 | GY  | 2B | AX.89418966 | 7.98E+08 | 0.05 | -4.30 | 3.09 | 0.04 |
| E2 | GY  | 2B | AX.89525241 | 6.92E+08 | 0.08 | -3.70 | 3.31 | 0.06 |
| E2 | GY  | 2B | AX.89525241 | 6.92E+08 | 0.08 | -3.70 | 3.31 | 0.06 |
| E2 | GY  | 2B | AX.89525251 | 7.57E+08 | 0.06 | -3.99 | 3.11 | 0.04 |
| E2 | GY  | 2B | AX.89525251 | 7.57E+08 | 0.06 | -3.99 | 3.11 | 0.04 |
| E2 | GY  | 2B | AX.89752546 | 1.80E+08 | 0.19 | -2.80 | 4.02 | 0.06 |
| E2 | GY  | 2B | AX.89752546 | 1.80E+08 | 0.19 | -2.80 | 4.02 | 0.06 |
| E2 | GPS | 2B | AX.89343474 | 6.60E+08 | 0.16 | -1.79 | 3.03 | 0.04 |
| E2 | GY  | 2B | AX.89454067 | 1.82E+08 | 0.13 | -4.02 | 5.87 | 0.09 |
| E2 | GY  | 2B | AX.89454067 | 1.82E+08 | 0.13 | -4.02 | 5.87 | 0.09 |
| E2 | GY  | 2B | AX.89348028 | 1.30E+08 | 0.25 | -2.16 | 3.02 | 0.05 |
| E2 | GY  | 2B | AX.89348028 | 1.30E+08 | 0.25 | -2.16 | 3.02 | 0.05 |
| E2 | GY  | 2B | AX.89699414 | 1.79E+08 | 0.20 | -2.93 | 4.48 | 0.07 |
| E2 | GY  | 2B | AX.89699414 | 1.79E+08 | 0.20 | -2.93 | 4.48 | 0.07 |
| E2 | GY  | 2B | AX.89595331 | 1.84E+08 | 0.14 | -2.71 | 3.08 | 0.04 |
| E2 | TKW | 2B | AX.89688417 | 7.43E+08 | 0.36 | 0.99  | 3.33 | 0.06 |
| E2 | GY  | 2B | AX.89395850 | 1.84E+08 | 0.14 | -2.71 | 3.08 | 0.04 |
| E2 | TKW | 2B | AX.89713335 | 1.55E+08 | 0.20 | -1.24 | 3.53 | 0.06 |
| E2 | GY  | 2B | AX.89419963 | 6.60E+08 | 0.06 | -4.09 | 3.20 | 0.04 |
| E2 | GY  | 2B | AX.89419963 | 6.60E+08 | 0.06 | -4.09 | 3.20 | 0.04 |
| E2 | GY  | 2B | AX.89408490 | 1.83E+08 | 0.14 | -3.56 | 4.86 | 0.08 |
| E2 | GY  | 2B | AX.89372938 | 1.22E+08 | 0.25 | -2.18 | 3.04 | 0.05 |
| E2 | GY  | 2B | AX.89372938 | 1.22E+08 | 0.25 | -2.18 | 3.04 | 0.05 |
| E2 | GY  | 2B | AX.89561740 | 6.64E+08 | 0.06 | -5.47 | 5.01 | 0.07 |
| E2 | GY  | 2B | AX.89537067 | 1.22E+08 | 0.25 | -2.18 | 3.04 | 0.05 |
| E2 | GY  | 2B | AX.89560602 | 7.60E+08 | 0.06 | -4.75 | 3.93 | 0.05 |
| E2 | GY  | 2B | AX.89560602 | 7.60E+08 | 0.06 | -4.75 | 3.93 | 0.05 |
| E2 | GY  | 2B | AX.89455015 | 1.21E+08 | 0.25 | -2.18 | 3.04 | 0.05 |
| E2 | GY  | 2B | AX.89455015 | 1.21E+08 | 0.25 | -2.18 | 3.04 | 0.05 |
| E2 | GY  | 2B | AX.89316103 | 1.75E+08 | 0.18 | -3.40 | 5.31 | 0.09 |
| E2 | GY  | 2B | AX.89316103 | 1.75E+08 | 0.18 | -3.40 | 5.31 | 0.09 |
| E2 | GY  | 2B | AX.89384745 | 1.83E+08 | 0.14 | -3.11 | 3.81 | 0.06 |
| E2 | GY  | 2B | AX.89384745 | 1.83E+08 | 0.14 | -3.11 | 3.81 | 0.06 |
| E2 | GY  | 2B | AX.89669019 | 6.64E+08 | 0.06 | -4.62 | 3.95 | 0.05 |
| E2 | GY  | 2B | AX.89669019 | 6.64E+08 | 0.06 | -4.62 | 3.95 | 0.05 |

|    |     |    |             |          |      |       |      |      |
|----|-----|----|-------------|----------|------|-------|------|------|
| E2 | GY  | 2B | AX.89556519 | 1.83E+08 | 0.14 | -3.11 | 3.81 | 0.06 |
| E2 | GY  | 2B | AX.89556519 | 1.83E+08 | 0.14 | -3.11 | 3.81 | 0.06 |
| E2 | GY  | 2B | AX.89632158 | 1.53E+08 | 0.06 | -4.16 | 3.10 | 0.05 |
| E2 | GY  | 2B | AX.89632158 | 1.53E+08 | 0.06 | -4.16 | 3.10 | 0.05 |
| E2 | GY  | 2B | AX.89455556 | 1.80E+08 | 0.19 | -2.80 | 4.02 | 0.06 |
| E2 | GY  | 2B | AX.89455556 | 1.80E+08 | 0.19 | -2.80 | 4.02 | 0.06 |
| E2 | GY  | 2B | AX.89527353 | 1.81E+08 | 0.20 | -2.71 | 3.96 | 0.06 |
| E2 | GY  | 2B | AX.89527353 | 1.81E+08 | 0.20 | -2.71 | 3.96 | 0.06 |
| E2 | GY  | 2B | AX.89316984 | 1.83E+08 | 0.14 | -3.11 | 3.81 | 0.06 |
| E2 | GY  | 2B | AX.89316984 | 1.83E+08 | 0.14 | -3.11 | 3.81 | 0.06 |
| E2 | GY  | 2B | AX.89374622 | 1.78E+08 | 0.19 | -2.80 | 4.02 | 0.06 |
| E2 | GY  | 2B | AX.89374622 | 1.78E+08 | 0.19 | -2.80 | 4.02 | 0.06 |
| E2 | GY  | 2B | AX.89385918 | 1.79E+08 | 0.20 | -3.16 | 5.03 | 0.08 |
| E2 | GY  | 2B | AX.89385918 | 1.79E+08 | 0.20 | -3.16 | 5.03 | 0.08 |
| E2 | GY  | 2B | AX.89455994 | 1.28E+08 | 0.25 | -2.20 | 3.12 | 0.05 |
| E2 | GY  | 2B | AX.89455994 | 1.28E+08 | 0.25 | -2.20 | 3.12 | 0.05 |
| E2 | GY  | 2B | AX.89351218 | 6.59E+08 | 0.06 | -5.79 | 5.90 | 0.09 |
| E2 | GY  | 2B | AX.89351218 | 6.59E+08 | 0.06 | -5.79 | 5.90 | 0.09 |
| E2 | TKW | 2B | AX.89390936 | 7.40E+08 | 0.37 | 0.96  | 3.20 | 0.06 |
| E2 | GY  | 2B | AX.89562032 | 6.59E+08 | 0.07 | -4.01 | 3.30 | 0.04 |
| E2 | GY  | 2B | AX.89562032 | 6.59E+08 | 0.07 | -4.01 | 3.30 | 0.04 |
| E2 | GY  | 2B | AX.89562158 | 6.60E+08 | 0.06 | -5.03 | 4.29 | 0.06 |
| E2 | GY  | 2B | AX.89562158 | 6.60E+08 | 0.06 | -5.03 | 4.29 | 0.06 |
| E2 | GY  | 2B | AX.89598424 | 1.82E+08 | 0.14 | -3.11 | 3.81 | 0.06 |
| E2 | GY  | 2B | AX.89598424 | 1.82E+08 | 0.14 | -3.11 | 3.81 | 0.06 |
| E2 | GY  | 2B | AX.89386261 | 5.18E+08 | 0.09 | -3.52 | 3.51 | 0.05 |
| E2 | GY  | 2B | AX.89732531 | 6.60E+08 | 0.07 | -4.01 | 3.30 | 0.04 |
| E2 | GY  | 2B | AX.89732531 | 6.60E+08 | 0.07 | -4.01 | 3.30 | 0.04 |
| E2 | GY  | 2B | AX.89535945 | 1.80E+08 | 0.19 | -2.80 | 4.02 | 0.06 |
| E2 | GY  | 2B | AX.89535945 | 1.80E+08 | 0.19 | -2.80 | 4.02 | 0.06 |
| E2 | GY  | 2B | AX.89493461 | 1.83E+08 | 0.14 | -3.55 | 4.92 | 0.08 |
| E2 | GY  | 2B | AX.89493461 | 1.83E+08 | 0.14 | -3.55 | 4.92 | 0.08 |
| E2 | GY  | 2B | AX.89493544 | 1.00E+08 | 0.07 | -4.38 | 4.09 | 0.08 |
| E2 | GY  | 2B | AX.89493544 | 1.00E+08 | 0.07 | -4.38 | 4.09 | 0.08 |
| E2 | GY  | 2B | AX.89749264 | 1.79E+08 | 0.19 | -2.80 | 4.02 | 0.06 |
| E2 | GY  | 2B | AX.89749264 | 1.79E+08 | 0.19 | -2.80 | 4.02 | 0.06 |
| E2 | GY  | 2B | AX.89387058 | 1.03E+08 | 0.07 | -4.38 | 4.09 | 0.08 |
| E2 | GY  | 2B | AX.89387058 | 1.03E+08 | 0.07 | -4.38 | 4.09 | 0.08 |
| E2 | GY  | 2B | AX.89745248 | 1.82E+08 | 0.12 | -4.12 | 5.49 | 0.09 |
| E2 | GY  | 2B | AX.89745248 | 1.82E+08 | 0.12 | -4.12 | 5.49 | 0.09 |
| E2 | GY  | 2B | AX.89623870 | 5.89E+08 | 0.06 | -4.54 | 3.80 | 0.07 |
| E2 | GY  | 2B | AX.89623870 | 5.89E+08 | 0.06 | -4.54 | 3.80 | 0.07 |
| E2 | GY  | 2B | AX.89319203 | 6.59E+08 | 0.06 | -4.20 | 3.34 | 0.04 |
| E2 | GY  | 2B | AX.89319203 | 6.59E+08 | 0.06 | -4.20 | 3.34 | 0.04 |
| E2 | GY  | 2B | AX.89529850 | 1.78E+08 | 0.19 | -2.80 | 4.02 | 0.06 |
| E2 | GY  | 2B | AX.89529850 | 1.78E+08 | 0.19 | -2.80 | 4.02 | 0.06 |
| E2 | GY  | 2B | AX.89387913 | 1.47E+08 | 0.20 | -2.46 | 3.18 | 0.06 |
| E2 | GY  | 2B | AX.89387913 | 1.47E+08 | 0.20 | -2.46 | 3.18 | 0.06 |
| E2 | GY  | 2B | AX.89388066 | 1.77E+08 | 0.17 | -3.02 | 4.23 | 0.07 |
| E2 | GY  | 2B | AX.89388066 | 1.77E+08 | 0.17 | -3.02 | 4.23 | 0.07 |

|    |    |    |             |          |      |       |      |      |
|----|----|----|-------------|----------|------|-------|------|------|
| E2 | GY | 2B | AX.89319660 | 1.52E+08 | 0.06 | -4.16 | 3.10 | 0.05 |
| E2 | GY | 2B | AX.89319660 | 1.52E+08 | 0.06 | -4.16 | 3.10 | 0.05 |
| E2 | GY | 2B | AX.89432728 | 1.81E+08 | 0.26 | -2.46 | 3.87 | 0.06 |
| E2 | GY | 2B | AX.89432728 | 1.81E+08 | 0.26 | -2.46 | 3.87 | 0.06 |
| E2 | GY | 2B | AX.89319725 | 6.64E+08 | 0.05 | -4.64 | 3.48 | 0.05 |
| E2 | GY | 2B | AX.89319725 | 6.64E+08 | 0.05 | -4.64 | 3.48 | 0.05 |
| E2 | GY | 2B | AX.89458240 | 1.82E+08 | 0.13 | -3.57 | 4.64 | 0.07 |
| E2 | GY | 2B | AX.89672039 | 1.02E+08 | 0.07 | -4.38 | 4.09 | 0.08 |
| E2 | GY | 2B | AX.89672039 | 1.02E+08 | 0.07 | -4.38 | 4.09 | 0.08 |
| E2 | GY | 2B | AX.89753493 | 1.81E+08 | 0.24 | -2.28 | 3.21 | 0.05 |
| E2 | GY | 2B | AX.89753493 | 1.81E+08 | 0.24 | -2.28 | 3.21 | 0.05 |
| E2 | GY | 2B | AX.89484326 | 1.78E+08 | 0.19 | -2.80 | 4.02 | 0.06 |
| E2 | GY | 2B | AX.89484326 | 1.78E+08 | 0.19 | -2.80 | 4.02 | 0.06 |
| E2 | GY | 2B | AX.89746318 | 5.76E+08 | 0.05 | -5.83 | 4.80 | 0.10 |
| E2 | GY | 2B | AX.89746318 | 5.76E+08 | 0.05 | -5.83 | 4.80 | 0.10 |
| E2 | GY | 2B | AX.89388755 | 1.23E+08 | 0.25 | -2.20 | 3.12 | 0.05 |
| E2 | GY | 2B | AX.89388755 | 1.23E+08 | 0.25 | -2.20 | 3.12 | 0.05 |
| E2 | GY | 2B | AX.89342210 | 6.64E+08 | 0.05 | -4.64 | 3.48 | 0.05 |
| E2 | GY | 2B | AX.89458714 | 1.76E+08 | 0.17 | -3.02 | 4.23 | 0.07 |
| E2 | GY | 2B | AX.89458714 | 1.76E+08 | 0.17 | -3.02 | 4.23 | 0.07 |
| E2 | GY | 2B | AX.89353728 | 1.82E+08 | 0.13 | -3.57 | 4.64 | 0.07 |
| E2 | GY | 2B | AX.89576162 | 5.94E+08 | 0.06 | -4.54 | 3.80 | 0.07 |
| E2 | GY | 2B | AX.89576162 | 5.94E+08 | 0.06 | -4.54 | 3.80 | 0.07 |
| E2 | GY | 2B | AX.89605899 | 1.81E+08 | 0.13 | -4.14 | 6.29 | 0.11 |
| E2 | GY | 2B | AX.89605899 | 1.81E+08 | 0.13 | -4.14 | 6.29 | 0.11 |
| E2 | GY | 2B | AX.89354314 | 1.80E+08 | 0.20 | -2.81 | 4.09 | 0.07 |
| E2 | GY | 2B | AX.89354314 | 1.80E+08 | 0.20 | -2.81 | 4.09 | 0.07 |
| E2 | GY | 2B | AX.89459648 | 1.75E+08 | 0.18 | -3.40 | 5.31 | 0.09 |
| E2 | GY | 2B | AX.89674559 | 8.60E+06 | 0.35 | -2.19 | 3.57 | 0.04 |
| E2 | GY | 2B | AX.89624886 | 4.95E+08 | 0.11 | -3.32 | 3.50 | 0.04 |
| E2 | GY | 2B | AX.89624886 | 4.95E+08 | 0.11 | -3.32 | 3.50 | 0.04 |
| E2 | GY | 2B | AX.89343257 | 1.79E+08 | 0.20 | -2.59 | 3.61 | 0.06 |
| E2 | GY | 2B | AX.89343257 | 1.79E+08 | 0.20 | -2.59 | 3.61 | 0.06 |
| E2 | GY | 2B | AX.89637464 | 7.60E+08 | 0.06 | -3.99 | 3.11 | 0.04 |
| E2 | GY | 2B | AX.89637464 | 7.60E+08 | 0.06 | -3.99 | 3.11 | 0.04 |
| E2 | GY | 2B | AX.89496480 | 1.75E+08 | 0.18 | -3.40 | 5.31 | 0.09 |
| E2 | GY | 2B | AX.89496480 | 1.75E+08 | 0.18 | -3.40 | 5.31 | 0.09 |
| E2 | GY | 2B | AX.89460256 | 1.76E+08 | 0.17 | -3.02 | 4.23 | 0.07 |
| E2 | GY | 2B | AX.89355285 | 1.83E+08 | 0.15 | -3.18 | 4.16 | 0.06 |
| E2 | GY | 2B | AX.89355285 | 1.83E+08 | 0.15 | -3.18 | 4.16 | 0.06 |
| E2 | GY | 2B | AX.89332441 | 1.83E+08 | 0.14 | -3.55 | 4.92 | 0.08 |
| E2 | GY | 2B | AX.89577473 | 7.58E+08 | 0.06 | -3.99 | 3.11 | 0.04 |
| E2 | GY | 2B | AX.89577473 | 7.58E+08 | 0.06 | -3.99 | 3.11 | 0.04 |
| E2 | GY | 2B | AX.89590619 | 1.81E+08 | 0.12 | -4.12 | 5.49 | 0.09 |
| E2 | GY | 2B | AX.89590619 | 1.81E+08 | 0.12 | -4.12 | 5.49 | 0.09 |
| E2 | GY | 2B | AX.89460581 | 1.43E+08 | 0.25 | -2.18 | 3.05 | 0.05 |
| E2 | GY | 2B | AX.89460581 | 1.43E+08 | 0.25 | -2.18 | 3.05 | 0.05 |
| E2 | GY | 2B | AX.89332789 | 1.80E+08 | 0.20 | -3.16 | 5.03 | 0.08 |
| E2 | GY | 2B | AX.89625965 | 1.83E+08 | 0.14 | -3.55 | 4.92 | 0.08 |
| E2 | GY | 2B | AX.89625965 | 1.83E+08 | 0.14 | -3.55 | 4.92 | 0.08 |

|    |    |    |             |          |      |       |      |      |
|----|----|----|-------------|----------|------|-------|------|------|
| E2 | GY | 2B | AX.89521003 | 9.66E+05 | 0.07 | -5.59 | 6.51 | 0.10 |
| E2 | GY | 2B | AX.89521003 | 9.66E+05 | 0.07 | -5.59 | 6.51 | 0.10 |
| E2 | GY | 2B | AX.89486570 | 1.79E+08 | 0.19 | -2.80 | 4.02 | 0.06 |
| E2 | GY | 2B | AX.89486570 | 1.79E+08 | 0.19 | -2.80 | 4.02 | 0.06 |
| E2 | GY | 2B | AX.89591121 | 1.76E+08 | 0.17 | -3.07 | 4.29 | 0.07 |
| E2 | GY | 2B | AX.89591121 | 1.76E+08 | 0.17 | -3.07 | 4.29 | 0.07 |
| E2 | GY | 2B | AX.89663318 | 7.94E+08 | 0.09 | -3.65 | 3.55 | 0.05 |
| E2 | GY | 2B | AX.89663318 | 7.94E+08 | 0.09 | -3.65 | 3.55 | 0.05 |
| E2 | GY | 2B | AX.89774529 | 1.83E+08 | 0.14 | -3.11 | 3.81 | 0.06 |
| E2 | GY | 2B | AX.89774529 | 1.83E+08 | 0.14 | -3.11 | 3.81 | 0.06 |
| E2 | GY | 2B | AX.89461227 | 1.22E+08 | 0.25 | -2.18 | 3.04 | 0.05 |
| E2 | GY | 2B | AX.89391373 | 1.78E+08 | 0.19 | -2.80 | 4.02 | 0.06 |
| E2 | GY | 2B | AX.89603443 | 6.64E+08 | 0.05 | -4.74 | 3.62 | 0.05 |
| E2 | GY | 2B | AX.89603443 | 6.64E+08 | 0.05 | -4.74 | 3.62 | 0.05 |
| E2 | GY | 2B | AX.89615270 | 1.76E+08 | 0.17 | -3.02 | 4.23 | 0.07 |
| E2 | GY | 2B | AX.89615270 | 1.76E+08 | 0.17 | -3.02 | 4.23 | 0.07 |
| E2 | GY | 2B | AX.89323244 | 1.83E+08 | 0.14 | -3.55 | 4.92 | 0.08 |
| E2 | GY | 2B | AX.89323244 | 1.83E+08 | 0.14 | -3.55 | 4.92 | 0.08 |
| E2 | GY | 2B | AX.89749024 | 1.82E+08 | 0.13 | -3.57 | 4.64 | 0.07 |
| E2 | GY | 2B | AX.89749024 | 1.82E+08 | 0.13 | -3.57 | 4.64 | 0.07 |
| E2 | GY | 2B | AX.89497642 | 1.82E+08 | 0.12 | -4.12 | 5.49 | 0.09 |
| E2 | GY | 2B | AX.89497642 | 1.82E+08 | 0.12 | -4.12 | 5.49 | 0.09 |
| E2 | GY | 2B | AX.89323590 | 1.43E+08 | 0.25 | -2.18 | 3.05 | 0.05 |
| E2 | GY | 2B | AX.89323590 | 1.43E+08 | 0.25 | -2.18 | 3.05 | 0.05 |
| E2 | GY | 2B | AX.89647581 | 1.76E+08 | 0.17 | -3.02 | 4.23 | 0.07 |
| E2 | GY | 2B | AX.89647581 | 1.76E+08 | 0.17 | -3.02 | 4.23 | 0.07 |
| E2 | GY | 2B | AX.89461833 | 6.59E+08 | 0.06 | -5.03 | 4.29 | 0.06 |
| E2 | GY | 2B | AX.89461833 | 6.59E+08 | 0.06 | -5.03 | 4.29 | 0.06 |
| E2 | GY | 2B | AX.89323675 | 6.59E+08 | 0.06 | -5.03 | 4.29 | 0.06 |
| E2 | GY | 2B | AX.89323675 | 6.59E+08 | 0.06 | -5.03 | 4.29 | 0.06 |
| E2 | GY | 2B | AX.89323891 | 1.22E+08 | 0.25 | -2.18 | 3.04 | 0.05 |
| E2 | GY | 2B | AX.89323891 | 1.22E+08 | 0.25 | -2.18 | 3.04 | 0.05 |
| E2 | GY | 2B | AX.89323978 | 1.76E+08 | 0.17 | -3.02 | 4.23 | 0.07 |
| E2 | GY | 2B | AX.89323978 | 1.76E+08 | 0.17 | -3.02 | 4.23 | 0.07 |
| E2 | GY | 2B | AX.89393166 | 7.57E+08 | 0.07 | -4.66 | 4.58 | 0.06 |
| E2 | GY | 2B | AX.89393166 | 7.57E+08 | 0.07 | -4.66 | 4.58 | 0.06 |
| E2 | GY | 2B | AX.89324249 | 1.77E+08 | 0.18 | -3.40 | 5.31 | 0.09 |
| E2 | GY | 2B | AX.89324249 | 1.77E+08 | 0.18 | -3.40 | 5.31 | 0.09 |
| E2 | GY | 2B | AX.89511784 | 1.19E+08 | 0.24 | -2.19 | 3.01 | 0.05 |
| E2 | GY | 2B | AX.89393550 | 7.59E+08 | 0.06 | -3.99 | 3.11 | 0.04 |
| E2 | GY | 2B | AX.89393550 | 7.59E+08 | 0.06 | -3.99 | 3.11 | 0.04 |
| E2 | GY | 2B | AX.89523629 | 1.83E+08 | 0.14 | -3.11 | 3.81 | 0.06 |
| E2 | GY | 2B | AX.89523629 | 1.83E+08 | 0.14 | -3.11 | 3.81 | 0.06 |
| E2 | GY | 2B | AX.89690400 | 1.78E+08 | 0.19 | -2.80 | 4.02 | 0.06 |
| E2 | GY | 2B | AX.89690400 | 1.78E+08 | 0.19 | -2.80 | 4.02 | 0.06 |
| E2 | GY | 2B | AX.89534363 | 1.80E+08 | 0.19 | -2.80 | 4.02 | 0.06 |
| E2 | GY | 2B | AX.89534363 | 1.80E+08 | 0.19 | -2.80 | 4.02 | 0.06 |
| E2 | GY | 2B | AX.89463274 | 6.59E+08 | 0.06 | -5.03 | 4.29 | 0.06 |
| E2 | GY | 2B | AX.89463274 | 6.59E+08 | 0.06 | -5.03 | 4.29 | 0.06 |
| E2 | GY | 2B | AX.89605804 | 1.82E+08 | 0.14 | -3.62 | 5.15 | 0.08 |

|    |     |    |             |          |      |       |      |      |
|----|-----|----|-------------|----------|------|-------|------|------|
| E2 | GY  | 2B | AX.89605804 | 1.82E+08 | 0.14 | -3.62 | 5.15 | 0.08 |
| E2 | GY  | 2B | AX.89605884 | 1.78E+08 | 0.22 | -2.80 | 4.43 | 0.07 |
| E2 | GY  | 2B | AX.89605884 | 1.78E+08 | 0.22 | -2.80 | 4.43 | 0.07 |
| E2 | GY  | 2B | AX.89358906 | 7.57E+08 | 0.06 | -3.99 | 3.11 | 0.04 |
| E2 | GY  | 2B | AX.89358906 | 7.57E+08 | 0.06 | -3.99 | 3.11 | 0.04 |
| E2 | TKW | 2B | AX.89529518 | 5.94E+08 | 0.32 | 0.97  | 3.09 | 0.06 |
| E2 | GY  | 2B | AX.89534791 | 1.02E+08 | 0.07 | -4.38 | 4.09 | 0.08 |
| E2 | GY  | 2B | AX.89617519 | 6.63E+08 | 0.06 | -4.94 | 4.16 | 0.06 |
| E2 | GY  | 2B | AX.89739652 | 5.73E+08 | 0.06 | -5.00 | 4.26 | 0.09 |
| E2 | GY  | 2B | AX.89739652 | 5.73E+08 | 0.06 | -5.00 | 4.26 | 0.09 |
| E2 | GY  | 2B | AX.89463396 | 1.84E+08 | 0.12 | -3.02 | 3.16 | 0.05 |
| E2 | GY  | 2B | AX.89463396 | 1.84E+08 | 0.12 | -3.02 | 3.16 | 0.05 |
| E2 | GY  | 2B | AX.89499795 | 6.62E+08 | 0.06 | -5.03 | 4.29 | 0.06 |
| E2 | GY  | 2B | AX.89499795 | 6.62E+08 | 0.06 | -5.03 | 4.29 | 0.06 |
| E2 | GY  | 2B | AX.89325475 | 1.81E+08 | 0.12 | -4.12 | 5.49 | 0.09 |
| E2 | GY  | 2B | AX.89325475 | 1.81E+08 | 0.12 | -4.12 | 5.49 | 0.09 |
| E2 | GY  | 2B | AX.89703625 | 6.62E+08 | 0.06 | -5.03 | 4.29 | 0.06 |
| E2 | GY  | 2B | AX.89535150 | 1.02E+08 | 0.07 | -4.38 | 4.09 | 0.08 |
| E2 | GY  | 2B | AX.89535150 | 1.02E+08 | 0.07 | -4.38 | 4.09 | 0.08 |
| E2 | GY  | 2B | AX.89617915 | 1.47E+08 | 0.16 | -2.83 | 3.49 | 0.05 |
| E2 | GY  | 2B | AX.89558016 | 1.84E+08 | 0.14 | -3.11 | 3.81 | 0.06 |
| E2 | GY  | 2B | AX.89558016 | 1.84E+08 | 0.14 | -3.11 | 3.81 | 0.06 |
| E2 | GY  | 2B | AX.89335901 | 1.83E+08 | 0.14 | -3.55 | 4.92 | 0.08 |
| E2 | GY  | 2B | AX.89325940 | 1.83E+08 | 0.14 | -3.11 | 3.81 | 0.06 |
| E2 | GY  | 2B | AX.89629939 | 6.62E+08 | 0.07 | -4.97 | 4.77 | 0.07 |
| E2 | GY  | 2B | AX.89629939 | 6.62E+08 | 0.07 | -4.97 | 4.77 | 0.07 |
| E2 | GY  | 2B | AX.89326280 | 1.80E+08 | 0.20 | -3.16 | 5.03 | 0.08 |
| E2 | GY  | 2B | AX.89326280 | 1.80E+08 | 0.20 | -3.16 | 5.03 | 0.08 |
| E2 | GY  | 2B | AX.89326350 | 1.81E+08 | 0.20 | -3.16 | 5.03 | 0.08 |
| E2 | GY  | 2B | AX.89326350 | 1.81E+08 | 0.20 | -3.16 | 5.03 | 0.08 |
| E2 | GY  | 2B | AX.89360195 | 7.59E+08 | 0.06 | -3.99 | 3.11 | 0.04 |
| E2 | GY  | 2B | AX.89360195 | 7.59E+08 | 0.06 | -3.99 | 3.11 | 0.04 |
| E2 | GY  | 2B | AX.89464649 | 1.84E+08 | 0.14 | -2.71 | 3.08 | 0.04 |
| E2 | GY  | 2B | AX.89464649 | 1.84E+08 | 0.14 | -2.71 | 3.08 | 0.04 |
| E2 | GY  | 2B | AX.89769704 | 7.58E+08 | 0.06 | -3.99 | 3.11 | 0.04 |
| E2 | GY  | 2B | AX.89769704 | 7.58E+08 | 0.06 | -3.99 | 3.11 | 0.04 |
| E2 | GY  | 2B | AX.89725266 | 1.83E+08 | 0.14 | -3.11 | 3.81 | 0.06 |
| E2 | GY  | 2B | AX.89725266 | 1.83E+08 | 0.14 | -3.11 | 3.81 | 0.06 |
| E2 | GY  | 2B | AX.89595331 | 1.84E+08 | 0.14 | -2.71 | 3.08 | 0.04 |
| E2 | GY  | 2B | AX.89395850 | 1.84E+08 | 0.14 | -2.71 | 3.08 | 0.04 |
| E2 | GY  | 2B | AX.89432025 | 1.22E+08 | 0.25 | -2.18 | 3.04 | 0.05 |
| E2 | GY  | 2B | AX.89432025 | 1.22E+08 | 0.25 | -2.18 | 3.04 | 0.05 |
| E2 | GY  | 2B | AX.89408490 | 1.83E+08 | 0.14 | -3.56 | 4.86 | 0.08 |
| E2 | GY  | 2B | AX.89396452 | 5.72E+08 | 0.09 | -4.00 | 4.18 | 0.08 |
| E2 | GY  | 2B | AX.89396452 | 5.72E+08 | 0.09 | -4.00 | 4.18 | 0.08 |
| E2 | GY  | 2B | AX.89327212 | 1.80E+08 | 0.20 | -3.16 | 5.03 | 0.08 |
| E2 | GY  | 2B | AX.89327212 | 1.80E+08 | 0.20 | -3.16 | 5.03 | 0.08 |
| E2 | GY  | 2B | AX.89537067 | 1.22E+08 | 0.25 | -2.18 | 3.04 | 0.05 |
| E2 | TKW | 2B | AX.89519502 | 6.75E+08 | 0.27 | 1.02  | 3.03 | 0.05 |
| E2 | GY  | 2B | AX.89397326 | 1.79E+08 | 0.20 | -3.16 | 5.03 | 0.08 |



|    |    |    |             |          |      |       |      |      |
|----|----|----|-------------|----------|------|-------|------|------|
| E2 | GY | 2B | AX.89397326 | 1.79E+08 | 0.20 | -3.16 | 5.03 | 0.08 |
| E2 | GY | 2B | AX.89327794 | 1.78E+08 | 0.19 | -2.80 | 4.02 | 0.06 |
| E2 | GY | 2B | AX.89327794 | 1.78E+08 | 0.19 | -2.80 | 4.02 | 0.06 |
| E2 | GY | 2B | AX.89327795 | 1.39E+08 | 0.08 | -4.12 | 3.97 | 0.07 |
| E2 | GY | 2B | AX.89327795 | 1.39E+08 | 0.08 | -4.12 | 3.97 | 0.07 |
| E2 | GY | 2B | AX.89327830 | 7.59E+08 | 0.06 | -3.99 | 3.11 | 0.04 |
| E2 | GY | 2B | AX.89327830 | 7.59E+08 | 0.06 | -3.99 | 3.11 | 0.04 |
| E2 | GY | 2B | AX.89731091 | 1.75E+08 | 0.18 | -3.40 | 5.31 | 0.09 |
| E2 | GY | 2B | AX.89731091 | 1.75E+08 | 0.18 | -3.40 | 5.31 | 0.09 |
| E2 | GY | 2B | AX.89549378 | 1.47E+08 | 0.20 | -2.46 | 3.18 | 0.06 |
| E2 | GY | 2B | AX.89549378 | 1.47E+08 | 0.20 | -2.46 | 3.18 | 0.06 |
| E2 | GY | 2B | AX.89362279 | 5.72E+08 | 0.16 | -2.65 | 3.23 | 0.06 |
| E2 | GY | 2B | AX.89362279 | 5.72E+08 | 0.16 | -2.65 | 3.23 | 0.06 |
| E2 | GY | 2B | AX.89475557 | 6.59E+08 | 0.07 | -4.01 | 3.30 | 0.04 |
| E2 | GY | 2B | AX.89475557 | 6.59E+08 | 0.07 | -4.01 | 3.30 | 0.04 |
| E2 | GY | 2B | AX.89681647 | 1.48E+08 | 0.15 | -2.97 | 3.61 | 0.05 |
| E2 | GY | 2B | AX.89681647 | 1.48E+08 | 0.15 | -2.97 | 3.61 | 0.05 |
| E2 | GY | 2B | AX.89561621 | 7.57E+08 | 0.06 | -4.29 | 3.32 | 0.04 |
| E2 | GY | 2B | AX.89561621 | 7.57E+08 | 0.06 | -4.29 | 3.32 | 0.04 |
| E2 | GY | 2B | AX.89645080 | 1.23E+08 | 0.25 | -2.20 | 3.12 | 0.05 |
| E2 | GY | 2B | AX.89480571 | 1.83E+08 | 0.14 | -3.11 | 3.81 | 0.06 |
| E2 | GY | 2B | AX.89480571 | 1.83E+08 | 0.14 | -3.11 | 3.81 | 0.06 |
| E2 | GY | 2B | AX.89398806 | 1.81E+08 | 0.20 | -2.71 | 3.96 | 0.06 |
| E2 | GY | 2B | AX.89398806 | 1.81E+08 | 0.20 | -2.71 | 3.96 | 0.06 |
| E2 | GY | 2B | AX.89445883 | 1.83E+08 | 0.14 | -3.11 | 3.81 | 0.06 |
| E2 | GY | 2B | AX.89399328 | 1.83E+08 | 0.14 | -3.11 | 3.81 | 0.06 |
| E2 | GY | 2B | AX.89399328 | 1.83E+08 | 0.14 | -3.11 | 3.81 | 0.06 |
| E2 | GY | 2B | AX.89682491 | 1.81E+08 | 0.12 | -3.18 | 3.62 | 0.06 |
| E2 | GY | 2B | AX.89682491 | 1.81E+08 | 0.12 | -3.18 | 3.62 | 0.06 |
| E2 | GY | 2B | AX.89539161 | 1.82E+08 | 0.13 | -4.02 | 5.87 | 0.09 |
| E2 | GY | 2B | AX.89386261 | 5.18E+08 | 0.09 | -3.52 | 3.51 | 0.05 |
| E2 | GY | 2B | AX.89682796 | 1.84E+08 | 0.09 | -3.41 | 3.22 | 0.05 |
| E2 | GY | 2B | AX.89765084 | 1.81E+08 | 0.12 | -4.12 | 5.49 | 0.09 |
| E2 | GY | 2B | AX.89363904 | 6.64E+08 | 0.06 | -5.47 | 5.01 | 0.07 |
| E2 | GY | 2B | AX.89363904 | 6.64E+08 | 0.06 | -5.47 | 5.01 | 0.07 |
| E2 | GY | 2B | AX.89351791 | 1.83E+08 | 0.14 | -3.11 | 3.81 | 0.06 |
| E2 | GY | 2B | AX.89634458 | 1.79E+08 | 0.19 | -2.80 | 4.02 | 0.06 |
| E2 | GY | 2B | AX.89696744 | 1.79E+08 | 0.19 | -2.80 | 4.02 | 0.06 |
| E2 | GY | 2B | AX.89400251 | 7.59E+08 | 0.06 | -3.99 | 3.11 | 0.04 |
| E2 | GY | 2B | AX.89745228 | 1.22E+08 | 0.25 | -2.18 | 3.04 | 0.05 |
| E2 | GY | 2B | AX.89518028 | 1.81E+08 | 0.12 | -4.12 | 5.49 | 0.09 |
| E2 | GY | 2B | AX.89709245 | 1.29E+08 | 0.06 | -4.89 | 4.26 | 0.05 |
| E2 | GY | 2B | AX.89709245 | 1.29E+08 | 0.06 | -4.89 | 4.26 | 0.05 |
| E2 | GY | 2B | AX.89469521 | 1.83E+08 | 0.14 | -3.55 | 4.92 | 0.08 |
| E2 | GY | 2B | AX.89575510 | 1.34E+08 | 0.06 | -4.89 | 4.26 | 0.05 |
| E2 | GY | 2B | AX.89575510 | 1.34E+08 | 0.06 | -4.89 | 4.26 | 0.05 |
| E2 | GY | 2B | AX.89330672 | 6.60E+08 | 0.07 | -4.01 | 3.30 | 0.04 |
| E2 | GY | 2B | AX.89365441 | 1.79E+08 | 0.20 | -2.72 | 3.87 | 0.06 |
| E2 | GY | 2B | AX.89365441 | 1.79E+08 | 0.20 | -2.72 | 3.87 | 0.06 |
| E2 | GY | 2B | AX.89436572 | 1.82E+08 | 0.13 | -3.57 | 4.64 | 0.07 |

|    |     |    |             |          |      |       |      |      |
|----|-----|----|-------------|----------|------|-------|------|------|
| E2 | GY  | 2B | AX.89623578 | 1.79E+08 | 0.20 | -2.58 | 3.53 | 0.05 |
| E2 | GY  | 2B | AX.89575757 | 1.80E+08 | 0.19 | -2.80 | 4.02 | 0.06 |
| E2 | GY  | 2B | AX.89424214 | 1.79E+08 | 0.19 | -2.80 | 4.02 | 0.06 |
| E2 | GY  | 2B | AX.89331026 | 1.53E+08 | 0.06 | -4.16 | 3.10 | 0.05 |
| E2 | GY  | 2B | AX.89353728 | 1.82E+08 | 0.13 | -3.57 | 4.64 | 0.07 |
| E2 | GY  | 2B | AX.89444410 | 1.81E+08 | 0.12 | -3.18 | 3.62 | 0.06 |
| E2 | GY  | 2B | AX.89719069 | 7.57E+08 | 0.06 | -3.99 | 3.11 | 0.04 |
| E2 | GY  | 2B | AX.89564994 | 1.81E+08 | 0.11 | -3.62 | 4.24 | 0.07 |
| E2 | GY  | 2B | AX.89541694 | 1.40E+08 | 0.13 | -3.15 | 3.65 | 0.06 |
| E2 | GY  | 2B | AX.89402018 | 1.76E+08 | 0.18 | -3.40 | 5.31 | 0.09 |
| E2 | GY  | 2B | AX.89734860 | 1.81E+08 | 0.11 | -3.62 | 4.24 | 0.07 |
| E2 | GY  | 2B | AX.89507024 | 6.62E+08 | 0.06 | -4.41 | 3.40 | 0.04 |
| E2 | GY  | 2B | AX.89437088 | 1.22E+08 | 0.25 | -2.20 | 3.12 | 0.05 |
| E2 | GY  | 2B | AX.89698843 | 1.83E+08 | 0.14 | -3.55 | 4.92 | 0.08 |
| E2 | GY  | 2B | AX.89541745 | 1.82E+08 | 0.14 | -3.11 | 3.81 | 0.06 |
| E2 | GY  | 2B | AX.89541745 | 1.82E+08 | 0.14 | -3.11 | 3.81 | 0.06 |
| E2 | GY  | 2B | AX.89507172 | 1.79E+08 | 0.20 | -3.16 | 5.03 | 0.08 |
| E2 | GY  | 2B | AX.89612967 | 6.61E+08 | 0.06 | -5.03 | 4.29 | 0.06 |
| E2 | GY  | 2B | AX.89437310 | 5.64E+08 | 0.11 | -3.20 | 3.30 | 0.04 |
| E2 | GY  | 2B | AX.89331795 | 1.79E+08 | 0.20 | -2.93 | 4.48 | 0.07 |
| E2 | GY  | 2B | AX.89496154 | 1.79E+08 | 0.19 | -2.80 | 4.02 | 0.06 |
| E2 | GY  | 2B | AX.89496154 | 1.79E+08 | 0.19 | -2.80 | 4.02 | 0.06 |
| E2 | GY  | 2B | AX.89542438 | 6.64E+08 | 0.05 | -4.64 | 3.48 | 0.05 |
| E2 | GY  | 2B | AX.89332441 | 1.83E+08 | 0.14 | -3.55 | 4.92 | 0.08 |
| E2 | GY  | 2B | AX.89472568 | 6.64E+08 | 0.05 | -4.64 | 3.48 | 0.05 |
| E2 | GY  | 2B | AX.89686171 | 1.75E+08 | 0.17 | -3.02 | 4.23 | 0.07 |
| E2 | GY  | 2B | AX.89569931 | 6.62E+08 | 0.06 | -5.79 | 5.90 | 0.09 |
| E2 | GY  | 2B | AX.89489589 | 5.86E+08 | 0.06 | -4.54 | 3.80 | 0.07 |
| E2 | GY  | 2B | AX.89768980 | 1.22E+08 | 0.25 | -2.20 | 3.12 | 0.05 |
| E2 | GY  | 2B | AX.89332789 | 1.80E+08 | 0.20 | -3.16 | 5.03 | 0.08 |
| E2 | GY  | 2B | AX.89724642 | 1.22E+08 | 0.25 | -2.18 | 3.04 | 0.05 |
| E2 | GY  | 2B | AX.89724642 | 1.22E+08 | 0.25 | -2.18 | 3.04 | 0.05 |
| E2 | GY  | 2B | AX.89460927 | 1.79E+08 | 0.19 | -2.80 | 4.02 | 0.06 |
| E2 | GY  | 2B | AX.89500923 | 1.76E+08 | 0.17 | -3.28 | 4.79 | 0.08 |
| E2 | GY  | 2B | AX.89368860 | 6.59E+08 | 0.06 | -5.03 | 4.29 | 0.06 |
| E2 | GY  | 2B | AX.89368860 | 6.59E+08 | 0.06 | -5.03 | 4.29 | 0.06 |
| E2 | GY  | 2B | AX.89713278 | 5.93E+08 | 0.06 | -4.54 | 3.80 | 0.07 |
| E2 | GY  | 2B | AX.89679762 | 1.43E+08 | 0.25 | -2.18 | 3.05 | 0.05 |
| E2 | TKW | 2B | AX.89676429 | 5.94E+08 | 0.32 | 0.99  | 3.16 | 0.06 |
| E2 | GY  | 2B | AX.89722560 | 1.84E+08 | 0.14 | -3.11 | 3.81 | 0.06 |
| E2 | GY  | 2B | AX.89357145 | 1.80E+08 | 0.19 | -2.80 | 4.02 | 0.06 |
| E2 | GY  | 2B | AX.89552327 | 1.78E+08 | 0.20 | -3.16 | 5.03 | 0.08 |
| E2 | GY  | 2B | AX.89579357 | 1.83E+08 | 0.14 | -3.11 | 3.81 | 0.06 |
| E2 | GY  | 2B | AX.89579357 | 1.83E+08 | 0.14 | -3.11 | 3.81 | 0.06 |
| E2 | GY  | 2B | AX.89677120 | 1.79E+08 | 0.20 | -2.93 | 4.55 | 0.07 |
| E2 | GY  | 2B | AX.89563399 | 1.84E+08 | 0.14 | -3.11 | 3.81 | 0.06 |
| E2 | GY  | 2B | AX.89440441 | 1.31E+08 | 0.06 | -4.19 | 3.31 | 0.04 |
| E2 | GY  | 2B | AX.89440441 | 1.31E+08 | 0.06 | -4.19 | 3.31 | 0.04 |
| E2 | GY  | 2B | AX.89742669 | 7.57E+08 | 0.06 | -4.29 | 3.32 | 0.04 |
| E2 | GY  | 2B | AX.89689770 | 1.80E+08 | 0.20 | -2.81 | 4.09 | 0.07 |

|    |     |    |             |          |      |       |      |      |
|----|-----|----|-------------|----------|------|-------|------|------|
| E2 | GY  | 2B | AX.89689770 | 1.80E+08 | 0.20 | -2.81 | 4.09 | 0.07 |
| E2 | GY  | 2B | AX.89604923 | 1.78E+08 | 0.19 | -2.80 | 4.02 | 0.06 |
| E2 | GY  | 2B | AX.89742961 | 6.60E+08 | 0.07 | -4.01 | 3.30 | 0.04 |
| E2 | GY  | 2B | AX.89452013 | 1.82E+08 | 0.14 | -3.66 | 5.11 | 0.08 |
| E2 | GY  | 2B | AX.89702737 | 1.78E+08 | 0.19 | -2.80 | 4.02 | 0.06 |
| E2 | GY  | 2B | AX.89754603 | 1.22E+08 | 0.25 | -2.18 | 3.04 | 0.05 |
| E2 | TKW | 2B | AX.89590942 | 7.43E+08 | 0.37 | 1.01  | 3.43 | 0.06 |
| E2 | GY  | 2B | AX.89690569 | 1.78E+08 | 0.18 | -3.40 | 5.31 | 0.09 |
| E2 | GY  | 2B | AX.89727447 | 1.76E+08 | 0.17 | -3.02 | 4.23 | 0.07 |
| E2 | GY  | 2B | AX.89699216 | 1.82E+08 | 0.11 | -3.62 | 4.24 | 0.07 |
| E2 | GY  | 2B | AX.89441347 | 1.79E+08 | 0.19 | -2.80 | 4.02 | 0.06 |
| E2 | GY  | 2B | AX.89617519 | 6.63E+08 | 0.06 | -4.94 | 4.16 | 0.06 |
| E2 | GY  | 2B | AX.89666461 | 6.80E+08 | 0.06 | -4.06 | 3.17 | 0.04 |
| E2 | GY  | 2B | AX.89666461 | 6.80E+08 | 0.06 | -4.06 | 3.17 | 0.04 |
| E2 | GY  | 2B | AX.89406830 | 1.22E+08 | 0.25 | -2.18 | 3.04 | 0.05 |
| E2 | TKW | 2B | AX.89753690 | 7.44E+08 | 0.37 | 0.99  | 3.38 | 0.06 |
| E2 | GY  | 2B | AX.89724351 | 1.82E+08 | 0.13 | -3.57 | 4.64 | 0.07 |
| E2 | GY  | 2B | AX.89335901 | 1.83E+08 | 0.14 | -3.55 | 4.92 | 0.08 |
| E2 | GY  | 2B | AX.89407393 | 1.06E+08 | 0.08 | -3.56 | 3.29 | 0.05 |
| E2 | GY  | 2B | AX.89407393 | 1.06E+08 | 0.08 | -3.56 | 3.29 | 0.05 |
| E2 | GY  | 2B | AX.89692003 | 1.76E+08 | 0.17 | -3.02 | 4.23 | 0.07 |
| E2 | GY  | 2B | AX.89336171 | 5.94E+08 | 0.06 | -4.54 | 3.80 | 0.07 |
| E2 | GY  | 2B | AX.89445890 | 1.79E+08 | 0.20 | -2.93 | 4.48 | 0.07 |
| E2 | GY  | 2B | AX.89431286 | 6.35E+08 | 0.06 | -4.46 | 3.70 | 0.05 |
| E2 | GY  | 2B | AX.89431286 | 6.35E+08 | 0.06 | -4.46 | 3.70 | 0.05 |
| E2 | TKW | 2B | AX.89531301 | 7.38E+08 | 0.37 | 1.01  | 3.43 | 0.06 |
| E2 | TKW | 2B | AX.89625657 | 7.26E+08 | 0.40 | 1.00  | 3.48 | 0.06 |
| E2 | GY  | 2B | AX.89713274 | 7.75E+08 | 0.08 | -4.63 | 5.04 | 0.09 |
| E2 | GY  | 2B | AX.89713274 | 7.75E+08 | 0.08 | -4.63 | 5.04 | 0.09 |
| E2 | GY  | 2B | AX.89408291 | 1.40E+08 | 0.13 | -3.14 | 3.57 | 0.06 |
| E2 | GY  | 2B | AX.89630862 | 1.84E+08 | 0.14 | -3.55 | 4.92 | 0.08 |
| E2 | GY  | 2B | AX.89770264 | 1.83E+08 | 0.14 | -3.55 | 4.92 | 0.08 |
| E2 | GY  | 2B | AX.89419977 | 1.79E+08 | 0.20 | -2.58 | 3.53 | 0.05 |
| E2 | GY  | 2B | AX.89619321 | 1.80E+08 | 0.19 | -2.80 | 4.02 | 0.06 |
| E2 | GY  | 2B | AX.89443676 | 7.58E+08 | 0.06 | -3.99 | 3.11 | 0.04 |
| E2 | GY  | 2B | AX.89762396 | 1.75E+08 | 0.18 | -3.40 | 5.31 | 0.09 |
| E2 | GY  | 2B | AX.89762396 | 1.75E+08 | 0.18 | -3.40 | 5.31 | 0.09 |
| E2 | GY  | 2B | AX.89348759 | 1.78E+08 | 0.20 | -2.58 | 3.53 | 0.05 |
| E2 | GY  | 2B | AX.89583382 | 1.81E+08 | 0.12 | -4.12 | 5.49 | 0.09 |
| E2 | GY  | 2B | AX.89373157 | 1.84E+08 | 0.14 | -3.56 | 4.86 | 0.08 |
| E2 | GY  | 2B | AX.89373157 | 1.84E+08 | 0.14 | -3.56 | 4.86 | 0.08 |
| E2 | GY  | 2B | AX.89718685 | 1.82E+08 | 0.13 | -4.02 | 5.87 | 0.09 |
| E2 | GY  | 2B | AX.89710344 | 7.57E+08 | 0.07 | -4.00 | 3.30 | 0.04 |
| E2 | GY  | 2B | AX.89754232 | 1.30E+08 | 0.25 | -2.20 | 3.12 | 0.05 |
| E2 | GY  | 2B | AX.89491567 | 1.84E+08 | 0.14 | -3.11 | 3.81 | 0.06 |
| E2 | GY  | 2B | AX.89338416 | 7.60E+08 | 0.06 | -3.99 | 3.11 | 0.04 |
| E2 | GY  | 2B | AX.89338416 | 7.60E+08 | 0.06 | -3.99 | 3.11 | 0.04 |
| E2 | GY  | 2B | AX.89410146 | 1.84E+08 | 0.14 | -3.55 | 4.92 | 0.08 |
| E2 | GY  | 2B | AX.89664208 | 6.61E+08 | 0.06 | -5.03 | 4.29 | 0.06 |
| E2 | GY  | 2B | AX.89480023 | 1.81E+08 | 0.12 | -4.12 | 5.49 | 0.09 |

|    |      |    |             |          |      |          |      |      |
|----|------|----|-------------|----------|------|----------|------|------|
| E2 | GY   | 2B | AX.89480023 | 1.81E+08 | 0.12 | -4.12    | 5.49 | 0.09 |
| E2 | GY   | 2B | AX.89483881 | 1.75E+08 | 0.18 | -3.40    | 5.31 | 0.09 |
| E2 | GY   | 2B | AX.89645080 | 1.23E+08 | 0.25 | -2.20    | 3.12 | 0.05 |
| E2 | GY   | 2B | AX.89654194 | 1.81E+08 | 0.11 | -3.62    | 4.24 | 0.07 |
| E2 | GPM2 | 2B | AX.89699129 | 1.09E+07 | 0.06 | 1118.53  | 3.64 | 0.07 |
| E2 | GY   | 2B | AX.89375220 | 1.84E+08 | 0.14 | -3.55    | 4.92 | 0.08 |
| E2 | GY   | 2B | AX.89375220 | 1.84E+08 | 0.14 | -3.55    | 4.92 | 0.08 |
| E2 | GY   | 2B | AX.89516909 | 6.64E+08 | 0.05 | -4.64    | 3.48 | 0.05 |
| E2 | GY   | 2B | AX.89516909 | 6.64E+08 | 0.05 | -4.64    | 3.48 | 0.05 |
| E2 | GY   | 2B | AX.89728349 | 1.84E+08 | 0.14 | -3.11    | 3.81 | 0.06 |
| E2 | GY   | 2B | AX.89728349 | 1.84E+08 | 0.14 | -3.11    | 3.81 | 0.06 |
| E2 | GY   | 2B | AX.89539598 | 1.80E+08 | 0.19 | -2.80    | 4.02 | 0.06 |
| E2 | GY   | 2B | AX.89614451 | 1.83E+08 | 0.14 | -3.11    | 3.81 | 0.06 |
| E2 | GY   | 2B | AX.89614451 | 1.83E+08 | 0.14 | -3.11    | 3.81 | 0.06 |
| E2 | TKW  | 2B | AX.89375549 | 7.39E+08 | 0.37 | 0.96     | 3.20 | 0.06 |
| E2 | GY   | 2B | AX.89504410 | 1.83E+08 | 0.14 | -3.11    | 3.81 | 0.06 |
| E2 | GY   | 2B | AX.89635417 | 1.81E+08 | 0.12 | -4.12    | 5.49 | 0.09 |
| E2 | GY   | 2B | AX.89547594 | 1.75E+08 | 0.17 | -3.02    | 4.23 | 0.07 |
| E2 | GY   | 2B | AX.89547594 | 1.75E+08 | 0.17 | -3.02    | 4.23 | 0.07 |
| E2 | GY   | 2B | AX.89518028 | 1.81E+08 | 0.12 | -4.12    | 5.49 | 0.09 |
| E2 | GY   | 2B | AX.89376827 | 5.72E+08 | 0.16 | -2.65    | 3.23 | 0.06 |
| E2 | GY   | 2B | AX.89376827 | 5.72E+08 | 0.16 | -2.65    | 3.23 | 0.06 |
| E2 | GY   | 2B | AX.89713743 | 1.84E+08 | 0.14 | -3.11    | 3.81 | 0.06 |
| E2 | GY   | 2B | AX.89647582 | 1.29E+08 | 0.06 | -4.89    | 4.26 | 0.05 |
| E2 | GY   | 2B | AX.89647582 | 1.29E+08 | 0.06 | -4.89    | 4.26 | 0.05 |
| E2 | GY   | 2B | AX.89588768 | 6.60E+08 | 0.06 | -5.03    | 4.29 | 0.06 |
| E2 | GY   | 2B | AX.89588768 | 6.60E+08 | 0.06 | -5.03    | 4.29 | 0.06 |
| E2 | GY   | 2B | AX.89444410 | 1.81E+08 | 0.12 | -3.18    | 3.62 | 0.06 |
| E2 | TKW  | 2B | AX.89573057 | 7.44E+08 | 0.36 | 0.98     | 3.27 | 0.06 |
| E2 | GY   | 2B | AX.89459157 | 1.81E+08 | 0.12 | -3.65    | 4.60 | 0.08 |
| E2 | GY   | 2B | AX.89698843 | 1.83E+08 | 0.14 | -3.55    | 4.92 | 0.08 |
| E2 | GY   | 2B | AX.89589315 | 7.59E+08 | 0.06 | -3.99    | 3.11 | 0.04 |
| E2 | GY   | 2B | AX.89589315 | 7.59E+08 | 0.06 | -3.99    | 3.11 | 0.04 |
| E2 | GY   | 2B | AX.89669665 | 1.82E+08 | 0.13 | -3.57    | 4.64 | 0.07 |
| E2 | GY   | 2B | AX.89669665 | 1.82E+08 | 0.13 | -3.57    | 4.64 | 0.07 |
| E2 | GY   | 2B | AX.89684472 | 1.81E+08 | 0.12 | -3.71    | 4.72 | 0.08 |
| E2 | GY   | 2B | AX.89684472 | 1.81E+08 | 0.12 | -3.71    | 4.72 | 0.08 |
| E2 | GY   | 2B | AX.89354288 | 1.48E+08 | 0.16 | -2.83    | 3.49 | 0.05 |
| E2 | GY   | 2B | AX.89354288 | 1.48E+08 | 0.16 | -2.83    | 3.49 | 0.05 |
| E2 | GY   | 2B | AX.89575490 | 1.81E+08 | 0.12 | -4.12    | 5.49 | 0.09 |
| E2 | TKW  | 2B | AX.89326712 | 7.44E+08 | 0.38 | 1.01     | 3.48 | 0.06 |
| E2 | GY   | 2B | AX.89760140 | 1.78E+08 | 0.19 | -2.80    | 4.02 | 0.06 |
| E2 | GY   | 2B | AX.89760140 | 1.78E+08 | 0.19 | -2.80    | 4.02 | 0.06 |
| E2 | GPM2 | 2B | AX.89470233 | 7.74E+08 | 0.07 | -1036.64 | 3.37 | 0.06 |
| E2 | GY   | 2B | AX.89686171 | 1.75E+08 | 0.17 | -3.02    | 4.23 | 0.07 |
| E2 | GY   | 2B | AX.89569931 | 6.62E+08 | 0.06 | -5.79    | 5.90 | 0.09 |
| E2 | GY   | 2B | AX.89621714 | 1.83E+08 | 0.14 | -3.55    | 4.92 | 0.08 |
| E2 | GY   | 2B | AX.89621714 | 1.83E+08 | 0.14 | -3.55    | 4.92 | 0.08 |
| E2 | GY   | 2B | AX.89554716 | 1.76E+08 | 0.18 | -2.77    | 3.78 | 0.06 |
| E2 | GY   | 2B | AX.89554716 | 1.76E+08 | 0.18 | -2.77    | 3.78 | 0.06 |

|    |     |    |             |          |      |       |      |      |
|----|-----|----|-------------|----------|------|-------|------|------|
| E2 | GY  | 2B | AX.89626799 | 1.82E+08 | 0.11 | -3.62 | 4.24 | 0.07 |
| E2 | GY  | 2B | AX.89678239 | 1.81E+08 | 0.20 | -2.71 | 3.96 | 0.06 |
| E2 | GY  | 2B | AX.89678239 | 1.81E+08 | 0.20 | -2.71 | 3.96 | 0.06 |
| E2 | GY  | 2B | AX.89578198 | 7.12E+08 | 0.06 | -4.45 | 3.52 | 0.05 |
| E2 | GY  | 2B | AX.89591313 | 6.60E+08 | 0.07 | -4.73 | 4.67 | 0.07 |
| E2 | GY  | 2B | AX.89591313 | 6.60E+08 | 0.07 | -4.73 | 4.67 | 0.07 |
| E2 | GY  | 2B | AX.89638370 | 1.81E+08 | 0.24 | -2.52 | 3.81 | 0.05 |
| E2 | GY  | 2B | AX.89663766 | 1.43E+08 | 0.25 | -2.20 | 3.13 | 0.05 |
| E2 | GY  | 2B | AX.89663766 | 1.43E+08 | 0.25 | -2.20 | 3.13 | 0.05 |
| E2 | GY  | 2B | AX.89676426 | 1.82E+08 | 0.13 | -3.57 | 4.64 | 0.07 |
| E2 | GY  | 2B | AX.89676426 | 1.82E+08 | 0.13 | -3.57 | 4.64 | 0.07 |
| E2 | GY  | 2B | AX.89775125 | 7.95E+08 | 0.36 | -2.01 | 3.12 | 0.05 |
| E2 | GY  | 2B | AX.89737804 | 1.79E+08 | 0.20 | -3.16 | 5.03 | 0.08 |
| E2 | GY  | 2B | AX.89737804 | 1.79E+08 | 0.20 | -3.16 | 5.03 | 0.08 |
| E2 | GY  | 2B | AX.89626847 | 1.81E+08 | 0.11 | -3.62 | 4.24 | 0.07 |
| E2 | GY  | 2B | AX.89626847 | 1.81E+08 | 0.11 | -3.62 | 4.24 | 0.07 |
| E2 | GY  | 2B | AX.89742669 | 7.57E+08 | 0.06 | -4.29 | 3.32 | 0.04 |
| E2 | GY  | 2B | AX.89388929 | 1.79E+08 | 0.19 | -2.80 | 4.02 | 0.06 |
| E2 | GY  | 2B | AX.89388929 | 1.79E+08 | 0.19 | -2.80 | 4.02 | 0.06 |
| E2 | GY  | 2B | AX.89640311 | 1.81E+08 | 0.19 | -2.80 | 4.02 | 0.06 |
| E2 | GY  | 2B | AX.89742961 | 6.60E+08 | 0.07 | -4.01 | 3.30 | 0.04 |
| E2 | GY  | 2B | AX.89702737 | 1.78E+08 | 0.19 | -2.80 | 4.02 | 0.06 |
| E2 | GY  | 2B | AX.89561095 | 1.79E+08 | 0.19 | -2.80 | 4.02 | 0.06 |
| E2 | GY  | 2B | AX.89346764 | 1.79E+08 | 0.19 | -2.80 | 4.02 | 0.06 |
| E2 | GY  | 2B | AX.89346764 | 1.79E+08 | 0.19 | -2.80 | 4.02 | 0.06 |
| E2 | GY  | 2B | AX.89581448 | 1.01E+08 | 0.07 | -4.38 | 4.09 | 0.08 |
| E2 | GY  | 2B | AX.89581448 | 1.01E+08 | 0.07 | -4.38 | 4.09 | 0.08 |
| E2 | TKW | 2B | AX.89458271 | 5.94E+08 | 0.32 | 0.97  | 3.09 | 0.06 |
| E2 | GY  | 2B | AX.89489608 | 6.60E+08 | 0.07 | -4.07 | 3.79 | 0.05 |
| E2 | GY  | 2B | AX.89489608 | 6.60E+08 | 0.07 | -4.07 | 3.79 | 0.05 |
| E2 | GY  | 2B | AX.89445890 | 1.79E+08 | 0.20 | -2.93 | 4.48 | 0.07 |
| E2 | GY  | 2B | AX.89359988 | 1.78E+08 | 0.20 | -3.16 | 5.03 | 0.08 |
| E2 | GY  | 2B | AX.89359988 | 1.78E+08 | 0.20 | -3.16 | 5.03 | 0.08 |
| E2 | GY  | 2B | AX.89740553 | 1.03E+08 | 0.07 | -4.38 | 4.09 | 0.08 |
| E2 | GY  | 2B | AX.89740553 | 1.03E+08 | 0.07 | -4.38 | 4.09 | 0.08 |
| E2 | GY  | 2B | AX.89500920 | 1.79E+08 | 0.20 | -2.93 | 4.48 | 0.07 |
| E2 | GY  | 2B | AX.89500920 | 1.79E+08 | 0.20 | -2.93 | 4.48 | 0.07 |
| E2 | GY  | 2B | AX.89547217 | 1.81E+08 | 0.11 | -3.62 | 4.24 | 0.07 |
| E2 | GY  | 2B | AX.89547217 | 1.81E+08 | 0.11 | -3.62 | 4.24 | 0.07 |
| E2 | GY  | 2B | AX.89595787 | 1.84E+08 | 0.14 | -3.11 | 3.81 | 0.06 |
| E2 | GY  | 2B | AX.89595787 | 1.84E+08 | 0.14 | -3.11 | 3.81 | 0.06 |
| E2 | GY  | 2B | AX.89770264 | 1.83E+08 | 0.14 | -3.55 | 4.92 | 0.08 |
| E2 | GY  | 2B | AX.89348759 | 1.78E+08 | 0.20 | -2.58 | 3.53 | 0.05 |
| E2 | GY  | 2B | AX.89349377 | 1.81E+08 | 0.12 | -4.12 | 5.49 | 0.09 |
| E2 | GY  | 2B | AX.89349377 | 1.81E+08 | 0.12 | -4.12 | 5.49 | 0.09 |
| E2 | GY  | 2B | AX.89644113 | 1.84E+08 | 0.12 | -3.52 | 4.09 | 0.06 |
| E2 | GY  | 2B | AX.89619964 | 1.78E+08 | 0.20 | -3.16 | 5.03 | 0.08 |
| E2 | GY  | 2B | AX.89619964 | 1.78E+08 | 0.20 | -3.16 | 5.03 | 0.08 |
| E2 | TKW | 2B | AX.89495903 | 7.34E+08 | 0.46 | 0.99  | 3.56 | 0.07 |
| E2 | GY  | 2B | AX.89572391 | 1.82E+08 | 0.13 | -3.57 | 4.64 | 0.07 |

|    |     |    |             |          |      |       |      |      |
|----|-----|----|-------------|----------|------|-------|------|------|
| E2 | GY  | 2B | AX.89669239 | 6.52E+08 | 0.05 | -4.45 | 3.22 | 0.04 |
| E2 | GY  | 2B | AX.89669239 | 6.52E+08 | 0.05 | -4.45 | 3.22 | 0.04 |
| E2 | GY  | 2B | AX.89491567 | 1.84E+08 | 0.14 | -3.11 | 3.81 | 0.06 |
| E2 | GY  | 2B | AX.89350199 | 1.80E+08 | 0.19 | -2.80 | 4.02 | 0.06 |
| E2 | GY  | 2B | AX.89350199 | 1.80E+08 | 0.19 | -2.80 | 4.02 | 0.06 |
| E2 | GY  | 2B | AX.89561095 | 1.79E+08 | 0.19 | -2.80 | 4.02 | 0.06 |
| E2 | GY  | 2B | AX.89698976 | 7.57E+08 | 0.06 | -4.29 | 3.32 | 0.04 |
| E2 | GY  | 2B | AX.89534554 | 6.63E+08 | 0.05 | -5.90 | 5.31 | 0.08 |
| E2 | GY  | 2B | AX.89534554 | 6.63E+08 | 0.05 | -5.90 | 5.31 | 0.08 |
| E2 | GY  | 2B | AX.89743777 | 1.79E+08 | 0.19 | -2.80 | 4.02 | 0.06 |
| E2 | GY  | 2B | AX.89743777 | 1.79E+08 | 0.19 | -2.80 | 4.02 | 0.06 |
| E2 | TKW | 2B | AX.89430844 | 5.94E+08 | 0.33 | 0.96  | 3.04 | 0.05 |
| E2 | GY  | 2B | AX.89726785 | 6.62E+08 | 0.06 | -5.03 | 4.29 | 0.06 |
| E2 | GY  | 2B | AX.89726785 | 6.62E+08 | 0.06 | -5.03 | 4.29 | 0.06 |
| E2 | GY  | 2B | AX.89496528 | 1.54E+08 | 0.06 | -4.16 | 3.10 | 0.05 |
| E2 | GY  | 2B | AX.89496528 | 1.54E+08 | 0.06 | -4.16 | 3.10 | 0.05 |
| E2 | GY  | 2B | AX.89728726 | 6.62E+08 | 0.06 | -5.03 | 4.29 | 0.06 |
| E2 | GY  | 2B | AX.89728726 | 6.62E+08 | 0.06 | -5.03 | 4.29 | 0.06 |
| E2 | GY  | 2B | AX.89457015 | 1.81E+08 | 0.11 | -3.62 | 4.24 | 0.07 |
| E2 | GY  | 2B | AX.89457015 | 1.81E+08 | 0.11 | -3.62 | 4.24 | 0.07 |
| E2 | GY  | 2B | AX.89538197 | 1.80E+08 | 0.20 | -2.91 | 4.35 | 0.07 |
| E2 | GY  | 2B | AX.89539598 | 1.80E+08 | 0.19 | -2.80 | 4.02 | 0.06 |
| E2 | GY  | 2B | AX.89717315 | 1.79E+08 | 0.20 | -2.93 | 4.48 | 0.07 |
| E2 | TKW | 2B | AX.89399434 | 6.97E+08 | 0.42 | 0.95  | 3.22 | 0.06 |
| E2 | TKW | 2B | AX.89380713 | 7.38E+08 | 0.37 | 1.01  | 3.43 | 0.06 |
| E2 | GY  | 2B | AX.89504410 | 1.83E+08 | 0.14 | -3.11 | 3.81 | 0.06 |
| E2 | GY  | 2B | AX.89635417 | 1.81E+08 | 0.12 | -4.12 | 5.49 | 0.09 |
| E2 | GY  | 2B | AX.89581629 | 1.76E+08 | 0.18 | -3.40 | 5.31 | 0.09 |
| E2 | GY  | 2B | AX.89581629 | 1.76E+08 | 0.18 | -3.40 | 5.31 | 0.09 |
| E2 | GY  | 2B | AX.89713743 | 1.84E+08 | 0.14 | -3.11 | 3.81 | 0.06 |
| E2 | GY  | 2B | AX.89634349 | 1.79E+08 | 0.20 | -2.58 | 3.53 | 0.05 |
| E2 | GY  | 2B | AX.89634349 | 1.79E+08 | 0.20 | -2.58 | 3.53 | 0.05 |
| E2 | GY  | 2B | AX.89724272 | 6.62E+08 | 0.06 | -5.79 | 5.90 | 0.09 |
| E2 | GY  | 2B | AX.89724272 | 6.62E+08 | 0.06 | -5.79 | 5.90 | 0.09 |
| E2 | GY  | 2B | AX.89424214 | 1.79E+08 | 0.19 | -2.80 | 4.02 | 0.06 |
| E2 | GY  | 2B | AX.89705968 | 1.26E+08 | 0.06 | -4.89 | 4.26 | 0.05 |
| E2 | GY  | 2B | AX.89618666 | 1.52E+08 | 0.06 | -4.16 | 3.10 | 0.05 |
| E2 | GY  | 2B | AX.89459157 | 1.81E+08 | 0.12 | -3.65 | 4.60 | 0.08 |
| E2 | GY  | 2B | AX.89437088 | 1.22E+08 | 0.25 | -2.20 | 3.12 | 0.05 |
| E2 | GY  | 2B | AX.89593250 | 1.81E+08 | 0.12 | -4.12 | 5.49 | 0.09 |
| E2 | GY  | 2B | AX.89405839 | 1.81E+08 | 0.12 | -4.12 | 5.49 | 0.09 |
| E2 | TKW | 2B | AX.89403372 | 7.38E+08 | 0.37 | 1.01  | 3.43 | 0.06 |
| E2 | GY  | 2B | AX.89575490 | 1.81E+08 | 0.12 | -4.12 | 5.49 | 0.09 |
| E2 | GY  | 2B | AX.89706972 | 6.63E+08 | 0.06 | -4.94 | 4.16 | 0.06 |
| E2 | GY  | 2B | AX.89706972 | 6.63E+08 | 0.06 | -4.94 | 4.16 | 0.06 |
| E2 | TKW | 2B | AX.89440443 | 7.40E+08 | 0.37 | 0.96  | 3.20 | 0.06 |
| E2 | GY  | 2B | AX.89425790 | 1.81E+08 | 0.24 | -2.59 | 4.06 | 0.06 |
| E2 | GY  | 2B | AX.89425790 | 1.81E+08 | 0.24 | -2.59 | 4.06 | 0.06 |
| E2 | GY  | 2B | AX.89591171 | 1.83E+08 | 0.14 | -3.11 | 3.81 | 0.06 |
| E2 | GY  | 2B | AX.89591171 | 1.83E+08 | 0.14 | -3.11 | 3.81 | 0.06 |

|    |     |    |             |          |      |       |      |      |
|----|-----|----|-------------|----------|------|-------|------|------|
| E2 | TKW | 2B | AX.89391193 | 7.34E+08 | 0.37 | 1.01  | 3.43 | 0.06 |
| E2 | TKW | 2B | AX.89349703 | 7.34E+08 | 0.46 | 0.99  | 3.56 | 0.07 |
| E2 | GY  | 2B | AX.89438175 | 5.82E+08 | 0.06 | -4.94 | 4.12 | 0.08 |
| E2 | GY  | 2B | AX.89438175 | 5.82E+08 | 0.06 | -4.94 | 4.12 | 0.08 |
| E2 | TKW | 2B | AX.89593167 | 7.44E+08 | 0.37 | 1.01  | 3.43 | 0.06 |
| E2 | TKW | 2B | AX.89568935 | 5.94E+08 | 0.32 | 0.97  | 3.09 | 0.06 |
| E2 | GY  | 2B | AX.89728253 | 1.79E+08 | 0.19 | -2.80 | 4.02 | 0.06 |
| E2 | GY  | 2B | AX.89728253 | 1.79E+08 | 0.19 | -2.80 | 4.02 | 0.06 |
| E2 | GY  | 2B | AX.89658972 | 1.80E+08 | 0.20 | -3.16 | 5.03 | 0.08 |
| E2 | GY  | 2B | AX.89626799 | 1.82E+08 | 0.11 | -3.62 | 4.24 | 0.07 |
| E2 | GY  | 2B | AX.89578198 | 7.12E+08 | 0.06 | -4.45 | 3.52 | 0.05 |
| E2 | TKW | 2B | AX.89382407 | 7.34E+08 | 0.46 | 0.99  | 3.56 | 0.07 |
| E2 | GY  | 2B | AX.89638370 | 1.81E+08 | 0.24 | -2.52 | 3.81 | 0.05 |
| E2 | GY  | 2B | AX.89626420 | 6.35E+08 | 0.06 | -4.99 | 4.23 | 0.05 |
| E2 | GY  | 2B | AX.89775125 | 7.95E+08 | 0.36 | -2.01 | 3.12 | 0.05 |
| E2 | GY  | 2B | AX.89567954 | 1.81E+08 | 0.19 | -2.80 | 4.02 | 0.06 |
| E2 | GY  | 2B | AX.89567954 | 1.81E+08 | 0.19 | -2.80 | 4.02 | 0.06 |
| E2 | TKW | 2B | AX.89316432 | 7.37E+08 | 0.37 | 1.01  | 3.43 | 0.06 |
| E2 | TKW | 2B | AX.89417089 | 7.37E+08 | 0.38 | 0.94  | 3.09 | 0.06 |
| E2 | GY  | 2B | AX.89640311 | 1.81E+08 | 0.19 | -2.80 | 4.02 | 0.06 |
| E2 | GY  | 2B | AX.89604923 | 1.78E+08 | 0.19 | -2.80 | 4.02 | 0.06 |
| E2 | GY  | 2B | AX.89653407 | 1.76E+08 | 0.17 | -3.02 | 4.23 | 0.07 |
| E2 | GY  | 2B | AX.89653407 | 1.76E+08 | 0.17 | -3.02 | 4.23 | 0.07 |
| E2 | GY  | 2B | AX.89593250 | 1.81E+08 | 0.12 | -4.12 | 5.49 | 0.09 |
| E2 | GY  | 2B | AX.89722172 | 1.75E+08 | 0.18 | -3.40 | 5.31 | 0.09 |
| E2 | GY  | 2B | AX.89616947 | 1.30E+08 | 0.25 | -2.20 | 3.12 | 0.05 |
| E2 | GY  | 2B | AX.89616947 | 1.30E+08 | 0.25 | -2.20 | 3.12 | 0.05 |
| E2 | GY  | 2B | AX.89405839 | 1.81E+08 | 0.12 | -4.12 | 5.49 | 0.09 |
| E2 | GY  | 2B | AX.89698976 | 7.57E+08 | 0.06 | -4.29 | 3.32 | 0.04 |
| E2 | GY  | 2B | AX.89699216 | 1.82E+08 | 0.11 | -3.62 | 4.24 | 0.07 |
| E2 | TKW | 2B | AX.89661546 | 5.94E+08 | 0.32 | 0.99  | 3.16 | 0.06 |
| E2 | TKW | 2B | AX.89344400 | 7.39E+08 | 0.37 | 0.96  | 3.20 | 0.06 |
| E2 | TKW | 2B | AX.89652950 | 5.94E+08 | 0.32 | 0.99  | 3.16 | 0.06 |
| E2 | GY  | 2B | AX.89724351 | 1.82E+08 | 0.13 | -3.57 | 4.64 | 0.07 |
| E2 | TKW | 2B | AX.89723481 | 5.94E+08 | 0.33 | 0.96  | 3.04 | 0.05 |
| E2 | TKW | 2B | AX.89398799 | 6.08E+08 | 0.37 | 1.11  | 4.08 | 0.08 |
| E2 | TKW | 2B | AX.89352050 | 7.41E+08 | 0.37 | 0.96  | 3.20 | 0.06 |
| E2 | GY  | 2B | AX.89630862 | 1.84E+08 | 0.14 | -3.55 | 4.92 | 0.08 |
| E2 | GY  | 2B | AX.89419977 | 1.79E+08 | 0.20 | -2.58 | 3.53 | 0.05 |
| E2 | TKW | 2B | AX.89725518 | 7.39E+08 | 0.37 | 0.96  | 3.20 | 0.06 |
| E2 | GY  | 2B | AX.89540932 | 6.62E+08 | 0.06 | -5.03 | 4.29 | 0.06 |
| E2 | GY  | 2B | AX.89396912 | 1.02E+08 | 0.07 | -4.38 | 4.09 | 0.08 |
| E2 | GY  | 2B | AX.89396912 | 1.02E+08 | 0.07 | -4.38 | 4.09 | 0.08 |
| E2 | GY  | 2B | AX.89572391 | 1.82E+08 | 0.13 | -3.57 | 4.64 | 0.07 |
| E2 | TKW | 2B | AX.89735631 | 6.02E+08 | 0.38 | 1.07  | 3.87 | 0.07 |
| E2 | TKW | 2B | AX.89515639 | 5.95E+08 | 0.32 | 1.02  | 3.33 | 0.06 |
| E2 | TKW | 2B | AX.89761668 | 5.94E+08 | 0.32 | 0.99  | 3.16 | 0.06 |
| E2 | TKW | 2B | AX.89497472 | 7.44E+08 | 0.37 | 0.97  | 3.24 | 0.06 |
| E2 | GY  | 2B | AX.89765084 | 1.81E+08 | 0.12 | -4.12 | 5.49 | 0.09 |
| E2 | GY  | 2B | AX.89538197 | 1.80E+08 | 0.20 | -2.91 | 4.35 | 0.07 |

|    |      |    |             |          |      |          |      |      |
|----|------|----|-------------|----------|------|----------|------|------|
| E2 | GY   | 2B | AX.89577826 | 1.76E+08 | 0.17 | -3.02    | 4.23 | 0.07 |
| E2 | GPS  | 2B | AX.89409931 | 6.01E+08 | 0.46 | 1.37     | 3.22 | 0.05 |
| E2 | TKW  | 2B | AX.89572815 | 7.33E+08 | 0.18 | 1.17     | 3.02 | 0.05 |
| E2 | GY   | 2B | AX.89540301 | 5.76E+08 | 0.05 | -5.83    | 4.80 | 0.10 |
| E2 | TKW  | 2B | AX.89563683 | 1.89E+07 | 0.37 | 0.96     | 3.15 | 0.06 |
| E2 | GY   | 2B | AX.89623578 | 1.79E+08 | 0.20 | -2.58    | 3.53 | 0.05 |
| E2 | GY   | 2B | AX.89563399 | 1.84E+08 | 0.14 | -3.11    | 3.81 | 0.06 |
| E2 | GY   | 2B | AX.89705968 | 1.26E+08 | 0.06 | -4.89    | 4.26 | 0.05 |
| E2 | TKW  | 2B | AX.89351738 | 6.74E+08 | 0.34 | 1.00     | 3.28 | 0.06 |
| E2 | GY   | 2B | AX.89618666 | 1.52E+08 | 0.06 | -4.16    | 3.10 | 0.05 |
| E2 | GY   | 2B | AX.89719069 | 7.57E+08 | 0.06 | -3.99    | 3.11 | 0.04 |
| E2 | TKW  | 2B | AX.89686633 | 5.94E+08 | 0.32 | 0.97     | 3.09 | 0.06 |
| E2 | GY   | 2B | AX.89541690 | 1.78E+08 | 0.19 | -2.80    | 4.02 | 0.06 |
| E2 | GY   | 2B | AX.89541690 | 1.78E+08 | 0.19 | -2.80    | 4.02 | 0.06 |
| E2 | GY   | 2B | AX.89734860 | 1.81E+08 | 0.11 | -3.62    | 4.24 | 0.07 |
| E2 | GY   | 2B | AX.89664208 | 6.61E+08 | 0.06 | -5.03    | 4.29 | 0.06 |
| E2 | TKW  | 2B | AX.89679254 | 7.33E+08 | 0.47 | 0.92     | 3.14 | 0.06 |
| E2 | TKW  | 2B | AX.89372916 | 7.41E+08 | 0.37 | 0.96     | 3.20 | 0.06 |
| E2 | GY   | 2B | AX.89449676 | 1.84E+08 | 0.14 | -2.71    | 3.01 | 0.04 |
| E2 | GY   | 2B | AX.89661751 | 6.36E+08 | 0.06 | -5.72    | 5.80 | 0.08 |
| E2 | GY   | 2B | AX.89696261 | 5.94E+08 | 0.06 | -4.54    | 3.80 | 0.07 |
| E2 | TKW  | 2B | AX.89553116 | 7.37E+08 | 0.37 | 1.01     | 3.43 | 0.06 |
| E2 | GY   | 2B | AX.89658972 | 1.80E+08 | 0.20 | -3.16    | 5.03 | 0.08 |
| E2 | GY   | 2B | AX.89775110 | 1.29E+08 | 0.06 | -4.89    | 4.26 | 0.05 |
| E2 | GPM2 | 2B | AX.89521003 | 9.66E+05 | 0.08 | -1094.80 | 4.07 | 0.07 |
| E2 | GY   | 2B | AX.89626420 | 6.35E+08 | 0.06 | -4.99    | 4.23 | 0.05 |
| E2 | GY   | 2B | AX.89729590 | 1.83E+08 | 0.14 | -3.11    | 3.81 | 0.06 |
| E2 | TKW  | 2B | AX.89739809 | 7.40E+08 | 0.37 | 0.96     | 3.20 | 0.06 |
| E2 | GY   | 2B | AX.89722172 | 1.75E+08 | 0.18 | -3.40    | 5.31 | 0.09 |
| E2 | TKW  | 2B | AX.89383653 | 6.02E+08 | 0.38 | 1.07     | 3.87 | 0.07 |
| E2 | GY   | 2B | AX.89511866 | 1.29E+08 | 0.25 | -2.20    | 3.12 | 0.05 |
| E2 | GY   | 2B | AX.89609412 | 1.81E+08 | 0.24 | -2.59    | 4.06 | 0.06 |
| E2 | GY   | 2B | AX.89476521 | 1.82E+08 | 0.12 | -4.12    | 5.49 | 0.09 |
| E2 | GY   | 2B | AX.89476521 | 1.82E+08 | 0.12 | -4.12    | 5.49 | 0.09 |
| E2 | GY   | 2B | AX.89637821 | 1.22E+08 | 0.25 | -2.20    | 3.12 | 0.05 |
| E2 | GY   | 2B | AX.89637821 | 1.22E+08 | 0.25 | -2.20    | 3.12 | 0.05 |
| E2 | GY   | 2B | AX.89729590 | 1.83E+08 | 0.14 | -3.11    | 3.81 | 0.06 |
| E2 | TKW  | 2B | AX.89610946 | 7.44E+08 | 0.39 | 0.98     | 3.37 | 0.06 |
| E2 | GY   | 2B | AX.89708086 | 1.84E+08 | 0.14 | -3.11    | 3.81 | 0.06 |
| E2 | GY   | 2B | AX.89540932 | 6.62E+08 | 0.06 | -5.03    | 4.29 | 0.06 |
| E2 | GY   | 2B | AX.89644113 | 1.84E+08 | 0.12 | -3.52    | 4.09 | 0.06 |
| E2 | GY   | 2B | AX.89765862 | 6.60E+08 | 0.06 | -5.03    | 4.29 | 0.06 |
| E2 | GY   | 2B | AX.89720671 | 1.79E+08 | 0.20 | -3.16    | 5.03 | 0.08 |
| E2 | GY   | 2B | AX.89696341 | 7.59E+08 | 0.06 | -3.99    | 3.11 | 0.04 |
| E2 | GY   | 2B | AX.89511866 | 1.29E+08 | 0.25 | -2.20    | 3.12 | 0.05 |
| E2 | GY   | 2B | AX.89483881 | 1.75E+08 | 0.18 | -3.40    | 5.31 | 0.09 |
| E2 | GY   | 2B | AX.89765752 | 1.78E+08 | 0.19 | -2.80    | 4.02 | 0.06 |
| E2 | GY   | 2B | AX.89608525 | 1.04E+08 | 0.07 | -4.38    | 4.09 | 0.08 |
| E2 | TKW  | 2B | AX.89438967 | 7.42E+08 | 0.38 | 0.93     | 3.06 | 0.05 |
| E2 | TKW  | 2B | AX.89616056 | 5.94E+08 | 0.32 | 0.97     | 3.09 | 0.06 |



|    |      |    |             |          |      |          |      |      |
|----|------|----|-------------|----------|------|----------|------|------|
| E2 | GY   | 2B | AX.89696261 | 5.94E+08 | 0.06 | -4.54    | 3.80 | 0.07 |
| E2 | GY   | 2B | AX.89614104 | 6.59E+08 | 0.06 | -5.03    | 4.29 | 0.06 |
| E2 | GY   | 2B | AX.89494298 | 7.60E+08 | 0.06 | -3.99    | 3.11 | 0.04 |
| E2 | GY   | 2B | AX.89494298 | 7.60E+08 | 0.06 | -3.99    | 3.11 | 0.04 |
| E2 | GY   | 2B | AX.89540301 | 5.76E+08 | 0.05 | -5.83    | 4.80 | 0.10 |
| E2 | TKW  | 2B | AX.89510700 | 7.39E+08 | 0.37 | 0.96     | 3.20 | 0.06 |
| E2 | GY   | 2B | AX.89696341 | 7.59E+08 | 0.06 | -3.99    | 3.11 | 0.04 |
| E2 | TKW  | 2B | AX.89634429 | 7.41E+08 | 0.39 | 0.92     | 3.03 | 0.05 |
| E2 | TKW  | 2B | AX.89769642 | 6.74E+08 | 0.34 | 1.00     | 3.28 | 0.06 |
| E2 | TKW  | 2B | AX.89462410 | 7.38E+08 | 0.38 | 1.01     | 3.47 | 0.06 |
| E2 | TKW  | 2B | AX.89451766 | 7.26E+08 | 0.40 | 1.02     | 3.65 | 0.07 |
| E2 | GY   | 2B | AX.89721075 | 1.03E+08 | 0.07 | -4.38    | 4.09 | 0.08 |
| E2 | TKW  | 2B | AX.89406404 | 7.34E+08 | 0.46 | 1.01     | 3.63 | 0.07 |
| E2 | GY   | 2B | AX.89681803 | 7.59E+08 | 0.06 | -4.29    | 3.32 | 0.04 |
| E2 | TKW  | 2B | AX.89470461 | 7.39E+08 | 0.37 | 0.96     | 3.20 | 0.06 |
| E2 | GY   | 2B | AX.89775110 | 1.29E+08 | 0.06 | -4.89    | 4.26 | 0.05 |
| E2 | GY   | 2B | AX.89614104 | 6.59E+08 | 0.06 | -5.03    | 4.29 | 0.06 |
| E2 | GPS  | 2B | AX.89374881 | 6.60E+08 | 0.17 | -1.78    | 3.14 | 0.05 |
| E2 | TKW  | 2B | AX.89418966 | 7.98E+08 | 0.05 | -2.05    | 3.06 | 0.05 |
| E2 | GY   | 2B | AX.89577826 | 1.76E+08 | 0.17 | -3.02    | 4.23 | 0.07 |
| E2 | TKW  | 2B | AX.89340885 | 5.94E+08 | 0.32 | 0.98     | 3.10 | 0.06 |
| E2 | GY   | 2B | AX.89765862 | 6.60E+08 | 0.06 | -5.03    | 4.29 | 0.06 |
| E2 | GY   | 2B | AX.89609412 | 1.81E+08 | 0.24 | -2.59    | 4.06 | 0.06 |
| E2 | GY   | 2B | AX.89681803 | 7.59E+08 | 0.06 | -4.29    | 3.32 | 0.04 |
| E2 | TKW  | 2B | AX.89333155 | 7.38E+08 | 0.35 | 1.08     | 3.78 | 0.07 |
| E2 | TKW  | 2B | AX.89607622 | 7.26E+08 | 0.40 | 1.01     | 3.54 | 0.06 |
| E2 | TKW  | 2B | AX.89696530 | 3.83E+07 | 0.15 | 1.57     | 4.52 | 0.07 |
| E2 | GY   | 2B | AX.89608525 | 1.04E+08 | 0.07 | -4.38    | 4.09 | 0.08 |
| E2 | GY   | 2B | AX.89449676 | 1.84E+08 | 0.14 | -2.71    | 3.01 | 0.04 |
| E2 | TKW  | 2B | AX.89630814 | 7.26E+08 | 0.40 | 0.93     | 3.10 | 0.06 |
| E2 | GY   | 2B | AX.89717315 | 1.79E+08 | 0.20 | -2.93    | 4.48 | 0.07 |
| E2 | TKW  | 2B | AX.89560674 | 6.73E+08 | 0.32 | 0.97     | 3.08 | 0.05 |
| E2 | GY   | 2B | AX.89720671 | 1.79E+08 | 0.20 | -3.16    | 5.03 | 0.08 |
| E2 | TKW  | 2B | AX.89329425 | 6.73E+08 | 0.34 | 1.00     | 3.28 | 0.06 |
| E2 | TKW  | 2B | AX.89534242 | 7.42E+08 | 0.18 | -1.16    | 3.01 | 0.05 |
| E2 | GY   | 2B | AX.89661751 | 6.36E+08 | 0.06 | -5.72    | 5.80 | 0.08 |
| E2 | GY   | 2B | AX.89765752 | 1.78E+08 | 0.19 | -2.80    | 4.02 | 0.06 |
| E2 | GY   | 2B | AX.89721075 | 1.03E+08 | 0.07 | -4.38    | 4.09 | 0.08 |
| E2 | TKW  | 2B | AX.89453246 | 7.41E+08 | 0.38 | 0.95     | 3.14 | 0.06 |
| E2 | TKW  | 2B | AX.89503580 | 7.43E+08 | 0.37 | 1.01     | 3.43 | 0.06 |
| E2 | GY   | 2B | AX.89673819 | 9.13E+06 | 0.45 | -1.98    | 3.16 | 0.07 |
| E2 | GY   | 2B | AX.89673819 | 9.13E+06 | 0.45 | -1.98    | 3.16 | 0.07 |
| E2 | TKW  | 2B | AX.89644872 | 7.38E+08 | 0.37 | 1.02     | 3.53 | 0.06 |
| E2 | GY   | 2B | AX.89708086 | 1.84E+08 | 0.14 | -3.11    | 3.81 | 0.06 |
| E2 | TKW  | 2B | AX.89585973 | 6.15E+08 | 0.33 | 0.96     | 3.03 | 0.05 |
| E2 | GPS  | 2B | AX.89774753 | 6.60E+08 | 0.16 | -1.81    | 3.04 | 0.05 |
| E3 | GPM2 | 2B | AX.89501127 | 3.70E+07 | 0.34 | 964.84   | 3.47 | 0.08 |
| E3 | GPM2 | 2B | AX.89557087 | 4.74E+07 | 0.21 | -1062.76 | 3.27 | 0.08 |
| E3 | GPM2 | 2B | AX.89743740 | 6.86E+07 | 0.10 | 1621.42  | 3.79 | 0.05 |
| E3 | GPM2 | 2B | AX.89769577 | 6.86E+07 | 0.10 | 1621.42  | 3.79 | 0.05 |

|    |      |    |               |          |      |         |      |      |
|----|------|----|---------------|----------|------|---------|------|------|
| E3 | GPM2 | 2B | AX.89370705   | 6.86E+07 | 0.08 | 2009.46 | 4.65 | 0.05 |
| E3 | GPM2 | 2B | AX.89503857   | 6.88E+07 | 0.10 | 1591.03 | 3.78 | 0.05 |
| E3 | GPS  | 2B | AX.89397447   | 4.93E+07 | 0.14 | -2.74   | 3.04 | 0.03 |
| E3 | GPS  | 2B | AX.89718064   | 6.38E+07 | 0.42 | 1.99    | 3.17 | 0.07 |
| E3 | GPS  | 2B | AX.89673606   | 7.46E+08 | 0.38 | 2.15    | 3.50 | 0.08 |
| E3 | GPS  | 2B | AX.89572765   | 7.46E+08 | 0.45 | 1.99    | 3.19 | 0.08 |
| E3 | GPS  | 2B | AX.89634826   | 7.46E+08 | 0.40 | 2.19    | 3.61 | 0.09 |
| E3 | GPS  | 2B | AX.89601989   | 7.46E+08 | 0.40 | 2.01    | 3.18 | 0.09 |
| E3 | GPS  | 2B | AX.89382399   | 7.46E+08 | 0.40 | 2.01    | 3.18 | 0.09 |
| E3 | GY   | 2B | AX.89501127   | 3.70E+07 | 0.34 | 3.77    | 4.56 | 0.11 |
| E3 | GY   | 2B | AX.89560158   | 6.82E+07 | 0.10 | 4.78    | 3.15 | 0.02 |
| E3 | GY   | 2B | AX.89743740   | 6.86E+07 | 0.10 | 5.63    | 4.06 | 0.03 |
| E3 | GY   | 2B | AX.89769577   | 6.86E+07 | 0.10 | 5.63    | 4.06 | 0.03 |
| E3 | GY   | 2B | AX.89370705   | 6.86E+07 | 0.08 | 6.32    | 4.17 | 0.04 |
| E3 | GY   | 2B | AX.89503857   | 6.88E+07 | 0.10 | 5.58    | 4.12 | 0.03 |
| E3 | GY   | 2B | AX.89550407   | 1.54E+08 | 0.40 | 2.86    | 3.15 | 0.01 |
| E3 | GY   | 2B | AX.89500028   | 1.54E+08 | 0.39 | 2.95    | 3.33 | 0.02 |
| E3 | GY   | 2B | AX.89605601   | 1.54E+08 | 0.39 | 2.95    | 3.33 | 0.02 |
| E3 | SPM2 | 2B | AX.89400127   | 7.07E+08 | 0.18 | 25.48   | 3.26 | 0.04 |
| E3 | SPM2 | 2B | AX.89715665   | 7.07E+08 | 0.19 | 24.14   | 3.14 | 0.04 |
| E3 | SPM2 | 2B | AX.89577125   | 7.07E+08 | 0.17 | 27.75   | 3.75 | 0.05 |
| E3 | SPM2 | 2B | X.89424732_OT | 7.08E+08 | 0.18 | 24.63   | 3.19 | 0.04 |
| E3 | SPM2 | 2B | AX.89485058   | 7.08E+08 | 0.13 | 29.10   | 3.21 | 0.04 |
| E3 | SPM2 | 2B | AX.89630235   | 7.08E+08 | 0.13 | 29.10   | 3.21 | 0.04 |
| E3 | TKW  | 2B | AX.89597425   | 2.54E+08 | 0.33 | 1.01    | 3.28 | 0.11 |
| E3 | TKW  | 2B | AX.89756391   | 2.92E+08 | 0.22 | -1.08   | 3.50 | 0.05 |
| E3 | TKW  | 2B | AX.89737535   | 7.49E+08 | 0.09 | 1.63    | 4.06 | 0.10 |
| E3 | TKW  | 2B | AX.89313663   | 7.49E+08 | 0.13 | 1.21    | 3.17 | 0.08 |
| E3 | TKW  | 2B | AX.89324477   | 7.50E+08 | 0.14 | 1.31    | 3.71 | 0.08 |
| E3 | TKW  | 2B | AX.89696490   | 7.50E+08 | 0.14 | 1.28    | 3.53 | 0.08 |
| E3 | TKW  | 2B | AX.89717881   | 7.52E+08 | 0.17 | 1.08    | 3.21 | 0.06 |
| E3 | TKW  | 2B | X.89532801_OT | 7.94E+08 | 0.43 | 0.90    | 3.69 | 0.05 |
| E3 | SPM2 | 2B | AX.89733515   | 7.33E+08 | 0.05 | 44.37   | 3.23 | 0.07 |
| E3 | SPM2 | 2B | AX.89641106   | 7.33E+08 | 0.04 | 69.95   | 5.58 | 0.12 |
| E3 | SPM2 | 2B | AX.89329299   | 7.33E+08 | 0.05 | 55.78   | 4.47 | 0.10 |
| E3 | SPM2 | 2B | AX.89351333   | 7.34E+08 | 0.04 | 64.11   | 5.20 | 0.11 |
| E3 | SPM2 | 2B | AX.89637930   | 7.34E+08 | 0.05 | 57.33   | 4.97 | 0.11 |
| E3 | SPM2 | 2B | AX.89521802   | 7.34E+08 | 0.05 | 65.91   | 5.94 | 0.12 |
| E3 | SPM2 | 2B | AX.89462422   | 7.34E+08 | 0.04 | 66.21   | 5.57 | 0.12 |
| E3 | SPM2 | 2B | AX.89708076   | 7.34E+08 | 0.06 | 52.14   | 4.65 | 0.10 |
| E3 | SPM2 | 2B | AX.89695677   | 7.71E+08 | 0.13 | 29.10   | 3.21 | 0.04 |
| E3 | SPM2 | 2B | AX.89439095   | 7.33E+08 | 0.05 | 49.36   | 3.84 | 0.09 |
| E3 | SPM2 | 2B | AX.89656537   | 7.33E+08 | 0.05 | 49.36   | 3.84 | 0.09 |
| E3 | SPM2 | 2B | AX.89513784   | 7.33E+08 | 0.05 | 49.36   | 3.84 | 0.09 |
| E3 | SPM2 | 2B | AX.89432828   | 7.33E+08 | 0.04 | 64.11   | 5.20 | 0.11 |
| E3 | SPM2 | 2B | AX.89556473   | 7.29E+08 | 0.05 | 44.69   | 3.06 | 0.07 |
| E3 | SPM2 | 2B | AX.89384448   | 7.29E+08 | 0.04 | 48.11   | 3.23 | 0.08 |
| E3 | SPM2 | 2B | AX.89401062   | 7.33E+08 | 0.04 | 54.84   | 3.63 | 0.07 |
| E3 | SPM2 | 2B | AX.89314901   | 7.33E+08 | 0.04 | 69.95   | 5.58 | 0.12 |
| E3 | SPM2 | 2B | AX.89331823   | 7.33E+08 | 0.04 | 64.11   | 5.20 | 0.11 |

|    |      |    |               |          |      |         |      |      |
|----|------|----|---------------|----------|------|---------|------|------|
| E3 | SPM2 | 2B | AX.89497538   | 7.33E+08 | 0.05 | 64.77   | 5.75 | 0.13 |
| E4 | GPM2 | 2B | AX.89478758   | 4.99E+06 | 0.29 | -475.86 | 3.22 | 0.03 |
| E4 | GPM2 | 2B | AX.89557087   | 4.74E+07 | 0.21 | -580.11 | 3.56 | 0.07 |
| E4 | GPM2 | 2B | AX.89414821   | 7.46E+08 | 0.48 | -457.04 | 3.50 | 0.04 |
| E4 | GPM2 | 2B | X.89454275_OT | 1.59E+08 | 0.14 | -628.66 | 3.29 | 0.06 |
| E4 | GPM2 | 2B | AX.89694845   | 1.59E+08 | 0.14 | -642.90 | 3.35 | 0.06 |
| E4 | GPM2 | 2B | AX.89771289   | 5.83E+08 | 0.07 | -879.23 | 3.17 | 0.05 |
| E4 | GPM2 | 2B | AX.89356824   | 5.84E+08 | 0.07 | -879.23 | 3.17 | 0.05 |
| E4 | GPM2 | 2B | AX.89636518   | 5.84E+08 | 0.07 | -879.23 | 3.17 | 0.05 |
| E4 | GPM2 | 2B | AX.89727255   | 7.46E+08 | 0.27 | 498.16  | 3.23 | 0.04 |
| E4 | GPM2 | 2B | AX.89656453   | 5.83E+08 | 0.07 | -879.23 | 3.17 | 0.05 |
| E4 | GPM2 | 2B | AX.89437010   | 5.83E+08 | 0.07 | -879.23 | 3.17 | 0.05 |
| E4 | GPS  | 2B | AX.89748791   | 5.74E+07 | 0.46 | 1.50    | 3.13 | 0.08 |
| E4 | GPS  | 2B | AX.89718064   | 6.38E+07 | 0.38 | 1.48    | 3.04 | 0.08 |
| E4 | GPS  | 2B | AX.89392286   | 2.62E+07 | 0.11 | 2.42    | 3.41 | 0.03 |
| E4 | GPS  | 2B | AX.89597712   | 2.63E+07 | 0.11 | 2.32    | 3.24 | 0.03 |
| E4 | GPS  | 2B | AX.89449728   | 2.01E+08 | 0.12 | 2.36    | 3.27 | 0.04 |
| E4 | GPS  | 2B | AX.89673482   | 5.43E+08 | 0.32 | -1.66   | 3.48 | 0.06 |
| E4 | GPS  | 2B | AX.89537726   | 6.79E+08 | 0.29 | 1.66    | 3.37 | 0.05 |
| E4 | GPS  | 2B | AX.89665560   | 7.67E+08 | 0.46 | 1.63    | 3.56 | 0.09 |
| E4 | GY   | 2B | X.89454275_OT | 1.59E+08 | 0.15 | -2.37   | 3.99 | 0.06 |
| E4 | GY   | 2B | AX.89694845   | 1.59E+08 | 0.14 | -2.32   | 3.78 | 0.05 |
| E4 | GY   | 2B | X.89394396_OT | 2.91E+08 | 0.08 | -3.19   | 4.21 | 0.06 |
| E4 | GY   | 2B | X.89531585_OT | 2.91E+08 | 0.08 | -2.90   | 3.66 | 0.05 |
| E4 | GY   | 2B | X.89442099_OT | 2.91E+08 | 0.08 | -3.28   | 4.24 | 0.06 |
| E4 | GY   | 2B | X.89532001_OT | 2.91E+08 | 0.08 | -2.90   | 3.66 | 0.05 |
| E4 | GY   | 2B | X.89513538_OT | 2.93E+08 | 0.08 | -3.19   | 4.21 | 0.06 |
| E4 | GY   | 2B | X.89729857_OT | 2.93E+08 | 0.08 | -3.07   | 3.82 | 0.05 |
| E4 | GY   | 2B | X.89394632_OT | 2.94E+08 | 0.08 | -3.19   | 4.21 | 0.06 |
| E4 | GY   | 2B | AX.89729008   | 2.96E+08 | 0.06 | -2.95   | 3.13 | 0.05 |
| E4 | GY   | 2B | AX.89450946   | 2.96E+08 | 0.10 | -2.59   | 3.33 | 0.05 |
| E4 | GY   | 2B | X.89327061_OT | 2.97E+08 | 0.08 | -3.34   | 4.46 | 0.06 |
| E4 | GY   | 2B | X.89489380_OT | 2.97E+08 | 0.08 | -3.19   | 4.21 | 0.06 |
| E4 | GY   | 2B | X.89406077_OT | 2.97E+08 | 0.08 | -3.19   | 4.21 | 0.06 |
| E4 | GY   | 2B | X.89619907_OT | 2.98E+08 | 0.08 | -3.19   | 4.21 | 0.06 |
| E4 | GY   | 2B | AX.89459997   | 3.54E+08 | 0.09 | -2.86   | 3.71 | 0.04 |
| E4 | GY   | 2B | AX.89566564   | 3.59E+08 | 0.08 | -3.28   | 4.25 | 0.05 |
| E4 | GY   | 2B | AX.89484994   | 4.06E+08 | 0.07 | -3.77   | 5.13 | 0.07 |
| E4 | GY   | 2B | AX.89656453   | 5.83E+08 | 0.07 | -3.03   | 3.34 | 0.05 |
| E4 | GY   | 2B | AX.89437010   | 5.83E+08 | 0.07 | -3.03   | 3.34 | 0.05 |
| E4 | GY   | 2B | AX.89771289   | 5.83E+08 | 0.07 | -3.03   | 3.34 | 0.05 |
| E4 | GY   | 2B | AX.89356824   | 5.84E+08 | 0.07 | -3.03   | 3.34 | 0.05 |
| E4 | GY   | 2B | AX.89636518   | 5.84E+08 | 0.07 | -3.03   | 3.34 | 0.05 |
| E4 | GY   | 2B | AX.89352390   | 5.84E+08 | 0.10 | -2.45   | 3.11 | 0.05 |
| E4 | GY   | 2B | AX.89592898   | 5.84E+08 | 0.10 | -2.45   | 3.11 | 0.05 |
| E4 | GY   | 2B | AX.89363506   | 5.84E+08 | 0.07 | -2.89   | 3.23 | 0.05 |
| E4 | GY   | 2B | AX.89517302   | 6.01E+08 | 0.09 | -2.69   | 3.21 | 0.05 |
| E4 | GY   | 2B | AX.89533752   | 6.01E+08 | 0.08 | -2.80   | 3.27 | 0.05 |
| E4 | GY   | 2B | AX.89641491   | 6.01E+08 | 0.08 | -3.08   | 3.94 | 0.06 |
| E4 | GY   | 2B | AX.89522387   | 7.18E+08 | 0.22 | -1.89   | 3.41 | 0.05 |

|    |      |    |               |          |      |         |      |      |
|----|------|----|---------------|----------|------|---------|------|------|
| E4 | GY   | 2B | AX.89727255   | 7.46E+08 | 0.27 | 1.66    | 3.11 | 0.05 |
| E4 | GY   | 2B | AX.89316979   | 7.65E+08 | 0.06 | -3.02   | 3.17 | 0.04 |
| E4 | GY   | 2B | AX.89413543   | 3.39E+07 | 0.37 | -1.52   | 3.15 | 0.04 |
| E4 | GY   | 2B | AX.89418752   | 1.46E+08 | 0.13 | -2.39   | 3.81 | 0.05 |
| E4 | GY   | 2B | AX.89341322   | 1.47E+08 | 0.16 | -1.99   | 3.16 | 0.04 |
| E4 | GY   | 2B | AX.89762335   | 1.47E+08 | 0.08 | -3.08   | 4.04 | 0.05 |
| E4 | SPM2 | 2B | AX.89613304   | 1.66E+08 | 0.49 | 15.42   | 3.02 | 0.05 |
| E4 | SPM2 | 2B | X.89612547_OT | 2.44E+08 | 0.10 | 26.76   | 3.10 | 0.05 |
| E4 | SPM2 | 2B | AX.89489368   | 4.91E+08 | 0.09 | 28.24   | 3.06 | 0.04 |
| E4 | SPM2 | 2B | AX.89396236   | 5.32E+08 | 0.08 | 30.90   | 3.32 | 0.04 |
| E4 | SPM2 | 2B | AX.89340804   | 5.32E+08 | 0.08 | 30.90   | 3.32 | 0.04 |
| E4 | SPM2 | 2B | AX.89503205   | 5.32E+08 | 0.08 | 30.90   | 3.32 | 0.04 |
| E4 | SPM2 | 2B | AX.89653530   | 5.32E+08 | 0.08 | 30.90   | 3.32 | 0.04 |
| E4 | SPM2 | 2B | AX.89761213   | 5.32E+08 | 0.08 | 30.90   | 3.32 | 0.04 |
| E4 | SPM2 | 2B | AX.89718643   | 5.33E+08 | 0.08 | 30.90   | 3.32 | 0.04 |
| E4 | SPM2 | 2B | AX.89541750   | 5.34E+08 | 0.08 | 30.90   | 3.32 | 0.04 |
| E4 | SPM2 | 2B | AX.89734593   | 5.34E+08 | 0.08 | 30.90   | 3.32 | 0.04 |
| E4 | SPM2 | 2B | AX.89660308   | 5.35E+08 | 0.07 | 30.15   | 3.08 | 0.04 |
| E4 | SPM2 | 2B | AX.89543079   | 5.35E+08 | 0.08 | 30.90   | 3.32 | 0.04 |
| E4 | SPM2 | 2B | AX.89543564   | 5.37E+08 | 0.08 | 30.90   | 3.32 | 0.04 |
| E4 | SPM2 | 2B | AX.89350734   | 5.37E+08 | 0.08 | 30.90   | 3.32 | 0.04 |
| E4 | SPM2 | 2B | AX.89615959   | 5.37E+08 | 0.08 | 30.90   | 3.32 | 0.04 |
| E4 | SPM2 | 2B | AX.89777658   | 5.37E+08 | 0.08 | 30.90   | 3.32 | 0.04 |
| E4 | SPM2 | 2B | AX.89691553   | 5.37E+08 | 0.08 | 30.90   | 3.32 | 0.04 |
| E4 | SPM2 | 2B | AX.89591952   | 5.38E+08 | 0.08 | 30.90   | 3.32 | 0.04 |
| E4 | SPM2 | 2B | AX.89411246   | 5.38E+08 | 0.07 | 30.15   | 3.08 | 0.04 |
| E4 | SPM2 | 2B | AX.89673482   | 5.43E+08 | 0.32 | 21.52   | 4.73 | 0.08 |
| E4 | SPM2 | 2B | AX.89321845   | 7.53E+08 | 0.12 | 24.49   | 3.25 | 0.05 |
| E1 | SPM2 | 2D | AX.89348011   | 5.65E+08 | 0.47 | -19.15  | 4.03 | 0.07 |
| E1 | GY   | 2D | AX.89380230   | 6.20E+08 | 0.06 | -4.77   | 3.08 | 0.05 |
| E1 | GY   | 2D | AX.89382235   | 3.50E+07 | 0.49 | -2.65   | 4.00 | 0.08 |
| E1 | GY   | 2D | AX.89496787   | 5.01E+08 | 0.13 | -4.13   | 4.24 | 0.08 |
| E1 | GY   | 2D | AX.89489393   | 5.42E+08 | 0.16 | -3.42   | 3.62 | 0.06 |
| E1 | GY   | 2D | AX.89496787   | 5.01E+08 | 0.13 | -4.13   | 4.24 | 0.08 |
| E1 | GY   | 2D | AX.89519128   | 4.15E+08 | 0.46 | 2.36    | 3.27 | 0.05 |
| E1 | GY   | 2D | AX.89380230   | 6.20E+08 | 0.06 | -4.77   | 3.08 | 0.05 |
| E1 | GY   | 2D | AX.89382235   | 3.50E+07 | 0.49 | -2.65   | 4.00 | 0.08 |
| E1 | GY   | 2D | AX.89519320   | 6.21E+08 | 0.06 | -4.77   | 3.08 | 0.05 |
| E1 | GY   | 2D | AX.89646023   | 3.40E+07 | 0.28 | -3.14   | 4.50 | 0.07 |
| E1 | GY   | 2D | AX.89491550   | 6.11E+08 | 0.31 | -2.54   | 3.26 | 0.05 |
| E1 | GY   | 2D | AX.89489393   | 5.42E+08 | 0.16 | -3.42   | 3.62 | 0.06 |
| E1 | GY   | 2D | AX.89491550   | 6.11E+08 | 0.31 | -2.54   | 3.26 | 0.05 |
| E1 | GY   | 2D | AX.89519128   | 4.15E+08 | 0.46 | 2.36    | 3.27 | 0.05 |
| E1 | GY   | 2D | AX.89415495   | 6.21E+08 | 0.06 | -4.77   | 3.08 | 0.05 |
| E1 | GY   | 2D | AX.89415495   | 6.21E+08 | 0.06 | -4.77   | 3.08 | 0.05 |
| E1 | GY   | 2D | AX.89519320   | 6.21E+08 | 0.06 | -4.77   | 3.08 | 0.05 |
| E1 | GPM2 | 2D | AX.89419786   | 1.65E+08 | 0.37 | 677.37  | 3.71 | 0.07 |
| E1 | GY   | 2D | AX.89646023   | 3.40E+07 | 0.28 | -3.14   | 4.50 | 0.07 |
| E1 | GPM2 | 2D | AX.89496787   | 5.01E+08 | 0.13 | -874.12 | 3.02 | 0.05 |
| E1 | GPM2 | 2D | AX.89519128   | 4.15E+08 | 0.46 | 627.72  | 3.44 | 0.06 |

|    |      |    |             |          |      |         |      |      |
|----|------|----|-------------|----------|------|---------|------|------|
| E1 | GPM2 | 2D | AX.89673053 | 8.21E+07 | 0.26 | -682.59 | 3.17 | 0.05 |
| E1 | TKW  | 2D | AX.89350526 | 7.74E+07 | 0.33 | 0.98    | 3.64 | 0.06 |
| E1 | TKW  | 2D | AX.89433606 | 7.74E+07 | 0.33 | 0.98    | 3.64 | 0.06 |
| E1 | TKW  | 2D | AX.89584589 | 5.79E+08 | 0.34 | 0.92    | 3.27 | 0.06 |
| E1 | TKW  | 2D | AX.89533726 | 5.71E+08 | 0.36 | 1.04    | 4.14 | 0.07 |
| E1 | TKW  | 2D | AX.89357550 | 7.74E+07 | 0.35 | 0.93    | 3.36 | 0.06 |
| E1 | TKW  | 2D | AX.89556429 | 7.70E+07 | 0.36 | 0.90    | 3.27 | 0.06 |
| E1 | TKW  | 2D | AX.89776110 | 7.73E+07 | 0.35 | 0.93    | 3.36 | 0.06 |
| E1 | TKW  | 2D | AX.89612783 | 6.09E+08 | 0.43 | 0.85    | 3.08 | 0.05 |
| E1 | TKW  | 2D | AX.89455622 | 7.74E+07 | 0.33 | 0.98    | 3.64 | 0.06 |
| E1 | TKW  | 2D | AX.89431879 | 7.73E+07 | 0.35 | 0.93    | 3.41 | 0.06 |
| E1 | TKW  | 2D | AX.89766573 | 7.71E+07 | 0.36 | 0.90    | 3.27 | 0.06 |
| E1 | TKW  | 2D | AX.89596235 | 7.72E+07 | 0.35 | 0.93    | 3.36 | 0.06 |
| E1 | TKW  | 2D | AX.89673053 | 8.21E+07 | 0.26 | 1.11    | 3.96 | 0.07 |
| E1 | TKW  | 2D | AX.89329392 | 7.70E+07 | 0.36 | 0.90    | 3.27 | 0.06 |
| E1 | TKW  | 2D | AX.89533458 | 7.74E+07 | 0.34 | 1.00    | 3.76 | 0.07 |
| E1 | TKW  | 2D | AX.89557747 | 7.71E+07 | 0.36 | 0.90    | 3.27 | 0.06 |
| E1 | TKW  | 2D | AX.89566420 | 7.70E+07 | 0.36 | 0.90    | 3.27 | 0.06 |
| E1 | TKW  | 2D | AX.89663377 | 7.74E+07 | 0.33 | 1.05    | 4.07 | 0.07 |
| E1 | TKW  | 2D | AX.89356326 | 7.74E+07 | 0.33 | 1.05    | 4.07 | 0.07 |
| E1 | TKW  | 2D | AX.89738253 | 7.74E+07 | 0.33 | 1.05    | 4.07 | 0.07 |
| E1 | TKW  | 2D | AX.89466378 | 7.71E+07 | 0.35 | 0.93    | 3.36 | 0.06 |
| E1 | TKW  | 2D | AX.89684462 | 5.94E+08 | 0.39 | 0.90    | 3.31 | 0.06 |
| E1 | TKW  | 2D | AX.89684771 | 7.72E+07 | 0.35 | 0.93    | 3.36 | 0.06 |
| E1 | TKW  | 2D | AX.89596220 | 7.70E+07 | 0.36 | 0.90    | 3.27 | 0.06 |
| E1 | TKW  | 2D | AX.89671873 | 7.71E+07 | 0.36 | 0.90    | 3.27 | 0.06 |
| E1 | TKW  | 2D | AX.89506063 | 7.74E+07 | 0.33 | 1.05    | 4.07 | 0.07 |
| E1 | TKW  | 2D | AX.89580589 | 5.84E+08 | 0.37 | 0.94    | 3.51 | 0.06 |
| E1 | TKW  | 2D | AX.89574114 | 7.74E+07 | 0.33 | 0.98    | 3.64 | 0.06 |
| E1 | TKW  | 2D | AX.89614392 | 7.74E+07 | 0.33 | 0.88    | 3.02 | 0.05 |
| E1 | TKW  | 2D | AX.89457560 | 8.18E+07 | 0.46 | -0.86   | 3.21 | 0.06 |
| E1 | TKW  | 2D | AX.89722081 | 7.66E+07 | 0.35 | 0.91    | 3.22 | 0.06 |
| E1 | TKW  | 2D | AX.89564320 | 7.74E+07 | 0.33 | 0.98    | 3.64 | 0.06 |
| E1 | TKW  | 2D | AX.89703856 | 7.70E+07 | 0.36 | 0.90    | 3.27 | 0.06 |
| E1 | TKW  | 2D | AX.89584377 | 7.74E+07 | 0.33 | 0.95    | 3.44 | 0.06 |
| E1 | TKW  | 2D | AX.89453418 | 7.73E+07 | 0.35 | 0.93    | 3.36 | 0.06 |
| E1 | TKW  | 2D | AX.89327593 | 7.74E+07 | 0.35 | 0.93    | 3.36 | 0.06 |
| E1 | TKW  | 2D | AX.89515222 | 7.74E+07 | 0.33 | 0.98    | 3.64 | 0.06 |
| E1 | TKW  | 2D | AX.89447235 | 7.74E+07 | 0.34 | 1.00    | 3.76 | 0.07 |
| E1 | TKW  | 2D | AX.89700060 | 8.19E+07 | 0.24 | 1.17    | 4.14 | 0.07 |
| E1 | TKW  | 2D | AX.89359112 | 7.70E+07 | 0.36 | 0.90    | 3.27 | 0.06 |
| E1 | TKW  | 2D | AX.89582111 | 7.71E+07 | 0.36 | 0.90    | 3.27 | 0.06 |
| E1 | TKW  | 2D | AX.89623305 | 7.83E+07 | 0.24 | 1.00    | 3.12 | 0.05 |
| E1 | TKW  | 2D | AX.89733080 | 7.74E+07 | 0.33 | 0.98    | 3.64 | 0.06 |
| E1 | TKW  | 2D | AX.89510886 | 6.09E+08 | 0.34 | 0.88    | 3.03 | 0.05 |
| E1 | TKW  | 2D | AX.89644060 | 7.69E+07 | 0.36 | 0.90    | 3.27 | 0.06 |
| E1 | TKW  | 2D | AX.89493758 | 7.73E+07 | 0.35 | 0.93    | 3.36 | 0.06 |
| E1 | TKW  | 2D | AX.89489393 | 5.42E+08 | 0.16 | -1.20   | 3.30 | 0.05 |
| E1 | TKW  | 2D | AX.89464875 | 7.69E+07 | 0.36 | 0.90    | 3.27 | 0.06 |
| E1 | TKW  | 2D | AX.89775034 | 7.73E+07 | 0.34 | 0.94    | 3.42 | 0.06 |

|    |      |    |             |          |      |         |      |      |
|----|------|----|-------------|----------|------|---------|------|------|
| E1 | TKW  | 2D | AX.89724371 | 5.86E+08 | 0.38 | 0.94    | 3.56 | 0.06 |
| E2 | SPM2 | 2D | AX.89438279 | 7.73E+07 | 0.20 | 15.33   | 3.27 | 0.06 |
| E2 | SPM2 | 2D | AX.89518048 | 6.00E+08 | 0.19 | 15.83   | 3.40 | 0.06 |
| E2 | SPM2 | 2D | AX.89402432 | 1.83E+08 | 0.07 | 25.80   | 3.54 | 0.06 |
| E2 | GY   | 2D | AX.89415495 | 6.21E+08 | 0.06 | -3.99   | 3.12 | 0.04 |
| E2 | GY   | 2D | AX.89415495 | 6.21E+08 | 0.06 | -3.99   | 3.12 | 0.04 |
| E2 | GY   | 2D | AX.89380230 | 6.20E+08 | 0.06 | -3.99   | 3.12 | 0.04 |
| E2 | GY   | 2D | AX.89380230 | 6.20E+08 | 0.06 | -3.99   | 3.12 | 0.04 |
| E2 | GY   | 2D | AX.89452098 | 5.22E+08 | 0.27 | -2.26   | 3.33 | 0.05 |
| E2 | GY   | 2D | AX.89452098 | 5.22E+08 | 0.27 | -2.26   | 3.33 | 0.05 |
| E2 | GPS  | 2D | AX.89671885 | 8.11E+07 | 0.22 | 1.63    | 3.11 | 0.05 |
| E2 | GY   | 2D | AX.89496787 | 5.01E+08 | 0.13 | -4.10   | 5.79 | 0.10 |
| E2 | TKW  | 2D | AX.89646023 | 3.40E+07 | 0.29 | -1.13   | 3.78 | 0.07 |
| E2 | GY   | 2D | AX.89519320 | 6.21E+08 | 0.06 | -3.99   | 3.12 | 0.04 |
| E2 | GPM2 | 2D | AX.89596012 | 9.88E+06 | 0.20 | 678.57  | 3.69 | 0.03 |
| E2 | GPS  | 2D | AX.89596012 | 9.88E+06 | 0.20 | 2.11    | 4.60 | 0.06 |
| E2 | GY   | 2D | AX.89519320 | 6.21E+08 | 0.06 | -3.99   | 3.12 | 0.04 |
| E2 | GY   | 2D | AX.89496787 | 5.01E+08 | 0.13 | -4.10   | 5.79 | 0.10 |
| E2 | TKW  | 2D | AX.89371003 | 3.71E+07 | 0.32 | 1.00    | 3.21 | 0.06 |
| E2 | TKW  | 2D | AX.89612783 | 6.09E+08 | 0.43 | 0.90    | 3.00 | 0.06 |
| E2 | TKW  | 2D | AX.89458193 | 6.09E+08 | 0.38 | 0.98    | 3.32 | 0.06 |
| E2 | GPM2 | 2D | AX.89496787 | 5.01E+08 | 0.13 | -756.26 | 3.26 | 0.06 |
| E2 | TKW  | 2D | AX.89382235 | 3.50E+07 | 0.49 | -1.09   | 4.15 | 0.08 |
| E2 | TKW  | 2D | AX.89729447 | 6.40E+08 | 0.50 | -0.92   | 3.17 | 0.06 |
| E2 | TKW  | 2D | AX.89491348 | 3.23E+07 | 0.38 | -1.00   | 3.50 | 0.07 |
| E3 | TKW  | 2D | AX.89525510 | 2.09E+07 | 0.42 | 1.16    | 3.81 | 0.21 |
| E3 | TKW  | 2D | AX.89366600 | 2.09E+07 | 0.42 | 1.20    | 4.02 | 0.22 |
| E3 | TKW  | 2D | AX.89506509 | 2.09E+07 | 0.42 | 1.17    | 3.89 | 0.22 |
| E3 | TKW  | 2D | AX.89466007 | 2.09E+07 | 0.42 | 1.20    | 4.02 | 0.22 |
| E3 | TKW  | 2D | AX.89332793 | 2.09E+07 | 0.42 | 1.18    | 3.94 | 0.22 |
| E3 | TKW  | 2D | AX.89693001 | 2.09E+07 | 0.42 | 1.18    | 3.96 | 0.22 |
| E3 | TKW  | 2D | AX.89389022 | 2.09E+07 | 0.42 | 1.15    | 3.76 | 0.21 |
| E3 | TKW  | 2D | AX.89736189 | 2.09E+07 | 0.42 | 1.16    | 3.81 | 0.21 |
| E3 | TKW  | 2D | AX.89390334 | 2.09E+07 | 0.42 | 1.16    | 3.81 | 0.21 |
| E3 | TKW  | 2D | AX.89547695 | 2.09E+07 | 0.42 | 1.16    | 3.81 | 0.21 |
| E3 | TKW  | 2D | AX.89410391 | 2.09E+07 | 0.42 | 1.16    | 3.81 | 0.21 |
| E3 | TKW  | 2D | AX.89573403 | 2.09E+07 | 0.42 | 1.16    | 3.81 | 0.21 |
| E3 | TKW  | 2D | AX.89685659 | 2.09E+07 | 0.43 | 1.13    | 3.60 | 0.21 |
| E3 | TKW  | 2D | AX.89524929 | 2.10E+07 | 0.42 | 1.15    | 3.76 | 0.21 |
| E3 | TKW  | 2D | AX.89320828 | 2.10E+07 | 0.42 | 1.15    | 3.76 | 0.21 |
| E3 | TKW  | 2D | AX.89630175 | 2.10E+07 | 0.41 | 1.02    | 3.04 | 0.20 |
| E3 | TKW  | 2D | AX.89571653 | 2.10E+07 | 0.41 | 1.02    | 3.04 | 0.20 |
| E3 | TKW  | 2D | AX.89450500 | 2.10E+07 | 0.41 | 1.02    | 3.04 | 0.20 |
| E3 | TKW  | 2D | AX.89769026 | 2.10E+07 | 0.42 | 1.10    | 3.47 | 0.21 |
| E3 | TKW  | 2D | AX.89536557 | 2.10E+07 | 0.42 | 1.10    | 3.47 | 0.21 |
| E3 | TKW  | 2D | AX.89347123 | 2.10E+07 | 0.41 | 1.02    | 3.04 | 0.20 |
| E3 | TKW  | 2D | AX.89552766 | 2.10E+07 | 0.42 | 1.09    | 3.43 | 0.20 |
| E3 | TKW  | 2D | AX.89436775 | 2.13E+07 | 0.43 | 1.13    | 3.60 | 0.21 |
| E3 | TKW  | 2D | AX.89414365 | 2.15E+07 | 0.42 | 1.15    | 3.76 | 0.21 |
| E3 | TKW  | 2D | AX.89445253 | 2.15E+07 | 0.42 | 1.15    | 3.76 | 0.21 |

|    |     |    |             |          |      |      |      |      |
|----|-----|----|-------------|----------|------|------|------|------|
| E3 | TKW | 2D | AX.89680110 | 2.15E+07 | 0.42 | 1.15 | 3.76 | 0.21 |
| E3 | TKW | 2D | AX.89735804 | 2.15E+07 | 0.42 | 1.15 | 3.76 | 0.21 |
| E3 | TKW | 2D | AX.89399410 | 2.15E+07 | 0.42 | 1.15 | 3.76 | 0.21 |
| E3 | TKW | 2D | AX.89589257 | 2.15E+07 | 0.42 | 1.15 | 3.76 | 0.21 |
| E3 | TKW | 2D | AX.89428087 | 2.15E+07 | 0.42 | 1.16 | 3.80 | 0.21 |
| E3 | TKW | 2D | AX.89621281 | 2.15E+07 | 0.41 | 1.06 | 3.30 | 0.20 |
| E3 | TKW | 2D | AX.89367033 | 2.16E+07 | 0.42 | 1.15 | 3.76 | 0.21 |
| E3 | TKW | 2D | AX.89477763 | 2.16E+07 | 0.42 | 1.15 | 3.76 | 0.21 |
| E3 | TKW | 2D | AX.89440072 | 2.16E+07 | 0.42 | 1.18 | 3.96 | 0.22 |
| E3 | TKW | 2D | AX.89687536 | 2.16E+07 | 0.42 | 1.20 | 4.07 | 0.22 |
| E3 | TKW | 2D | AX.89563629 | 2.16E+07 | 0.42 | 1.15 | 3.76 | 0.21 |
| E3 | TKW | 2D | AX.89390584 | 2.16E+07 | 0.42 | 1.18 | 3.96 | 0.22 |
| E3 | TKW | 2D | AX.89419142 | 2.16E+07 | 0.42 | 1.12 | 3.63 | 0.21 |
| E3 | TKW | 2D | AX.89430147 | 2.16E+07 | 0.42 | 1.15 | 3.76 | 0.21 |
| E3 | TKW | 2D | AX.89728485 | 2.16E+07 | 0.42 | 1.15 | 3.76 | 0.21 |
| E3 | TKW | 2D | AX.89387802 | 2.16E+07 | 0.42 | 1.18 | 3.96 | 0.22 |
| E3 | TKW | 2D | AX.89410112 | 2.16E+07 | 0.42 | 1.18 | 3.96 | 0.22 |
| E3 | TKW | 2D | AX.89488513 | 2.16E+07 | 0.42 | 1.18 | 3.96 | 0.22 |
| E3 | TKW | 2D | AX.89627631 | 2.16E+07 | 0.42 | 1.15 | 3.76 | 0.21 |
| E3 | TKW | 2D | AX.89492844 | 2.16E+07 | 0.42 | 1.15 | 3.76 | 0.21 |
| E3 | TKW | 2D | AX.89666819 | 2.16E+07 | 0.43 | 1.22 | 4.22 | 0.21 |
| E3 | TKW | 2D | AX.89355761 | 2.16E+07 | 0.42 | 1.15 | 3.76 | 0.21 |
| E3 | TKW | 2D | AX.89550995 | 2.16E+07 | 0.42 | 1.13 | 3.68 | 0.20 |
| E3 | TKW | 2D | AX.89675693 | 2.16E+07 | 0.42 | 1.15 | 3.76 | 0.21 |
| E3 | TKW | 2D | AX.89443581 | 2.16E+07 | 0.42 | 1.15 | 3.76 | 0.21 |
| E3 | TKW | 2D | AX.89706536 | 2.16E+07 | 0.42 | 1.15 | 3.76 | 0.21 |
| E3 | TKW | 2D | AX.89456760 | 2.16E+07 | 0.42 | 1.15 | 3.76 | 0.21 |
| E3 | TKW | 2D | AX.89777059 | 2.16E+07 | 0.42 | 1.15 | 3.76 | 0.21 |
| E3 | TKW | 2D | AX.89667231 | 2.16E+07 | 0.42 | 1.15 | 3.76 | 0.21 |
| E3 | TKW | 2D | AX.89429599 | 2.16E+07 | 0.42 | 1.15 | 3.76 | 0.21 |
| E3 | TKW | 2D | AX.89637527 | 2.16E+07 | 0.42 | 1.15 | 3.76 | 0.21 |
| E3 | TKW | 2D | AX.89608814 | 2.16E+07 | 0.43 | 1.22 | 4.22 | 0.21 |
| E3 | TKW | 2D | AX.89680314 | 2.17E+07 | 0.42 | 1.15 | 3.76 | 0.21 |
| E3 | TKW | 2D | AX.89644595 | 2.18E+07 | 0.42 | 1.15 | 3.76 | 0.21 |
| E3 | TKW | 2D | AX.89380548 | 2.18E+07 | 0.42 | 1.15 | 3.76 | 0.21 |
| E3 | TKW | 2D | AX.89418577 | 2.18E+07 | 0.42 | 1.20 | 4.02 | 0.22 |
| E3 | TKW | 2D | AX.89317178 | 2.18E+07 | 0.42 | 1.16 | 3.81 | 0.21 |
| E3 | TKW | 2D | AX.89411657 | 2.18E+07 | 0.42 | 1.24 | 4.35 | 0.23 |
| E3 | TKW | 2D | AX.89473251 | 2.18E+07 | 0.42 | 1.20 | 4.02 | 0.22 |
| E3 | TKW | 2D | AX.89462605 | 2.19E+07 | 0.42 | 1.20 | 4.02 | 0.22 |
| E3 | TKW | 2D | AX.89731153 | 2.19E+07 | 0.42 | 1.20 | 4.02 | 0.22 |
| E3 | TKW | 2D | AX.89729498 | 2.19E+07 | 0.42 | 1.15 | 3.76 | 0.21 |
| E3 | TKW | 2D | AX.89332538 | 2.19E+07 | 0.42 | 1.15 | 3.76 | 0.21 |
| E3 | TKW | 2D | AX.89682149 | 2.19E+07 | 0.42 | 1.15 | 3.76 | 0.21 |
| E3 | TKW | 2D | AX.89542539 | 2.19E+07 | 0.42 | 1.20 | 4.02 | 0.22 |
| E3 | TKW | 2D | AX.89501839 | 2.19E+07 | 0.42 | 1.20 | 4.02 | 0.22 |
| E3 | TKW | 2D | AX.89392697 | 2.19E+07 | 0.42 | 1.20 | 4.02 | 0.22 |
| E3 | TKW | 2D | AX.89516861 | 2.19E+07 | 0.42 | 1.20 | 4.02 | 0.22 |
| E3 | TKW | 2D | AX.89456220 | 2.19E+07 | 0.42 | 1.20 | 4.02 | 0.22 |
| E3 | TKW | 2D | AX.89464478 | 2.19E+07 | 0.42 | 1.15 | 3.76 | 0.21 |

|    |     |    |             |          |      |      |      |      |
|----|-----|----|-------------|----------|------|------|------|------|
| E3 | TKW | 2D | AX.89382211 | 2.19E+07 | 0.42 | 1.15 | 3.76 | 0.21 |
| E3 | TKW | 2D | AX.89406122 | 2.19E+07 | 0.42 | 1.16 | 3.81 | 0.21 |
| E3 | TKW | 2D | AX.89771438 | 2.21E+07 | 0.42 | 1.15 | 3.76 | 0.21 |
| E3 | TKW | 2D | AX.89616561 | 2.21E+07 | 0.42 | 1.15 | 3.76 | 0.21 |
| E3 | TKW | 2D | AX.89725607 | 2.21E+07 | 0.42 | 1.15 | 3.76 | 0.21 |
| E3 | TKW | 2D | AX.89625569 | 2.21E+07 | 0.42 | 1.16 | 3.81 | 0.21 |
| E3 | TKW | 2D | AX.89721153 | 2.21E+07 | 0.42 | 1.15 | 3.76 | 0.21 |
| E3 | TKW | 2D | AX.89531234 | 2.21E+07 | 0.42 | 1.20 | 4.02 | 0.22 |
| E3 | TKW | 2D | AX.89716105 | 2.21E+07 | 0.42 | 1.15 | 3.76 | 0.21 |
| E3 | TKW | 2D | AX.89679130 | 2.21E+07 | 0.42 | 1.15 | 3.76 | 0.21 |
| E3 | TKW | 2D | AX.89554568 | 2.22E+07 | 0.42 | 1.03 | 3.15 | 0.19 |
| E3 | TKW | 2D | AX.89613806 | 2.22E+07 | 0.42 | 1.03 | 3.15 | 0.19 |
| E3 | TKW | 2D | AX.89675543 | 2.22E+07 | 0.42 | 1.04 | 3.20 | 0.19 |
| E3 | TKW | 2D | AX.89602686 | 2.22E+07 | 0.42 | 1.03 | 3.15 | 0.19 |
| E3 | TKW | 2D | AX.89388871 | 2.22E+07 | 0.41 | 1.10 | 3.37 | 0.20 |
| E3 | TKW | 2D | AX.89503845 | 2.22E+07 | 0.41 | 1.10 | 3.37 | 0.20 |
| E3 | TKW | 2D | AX.89576820 | 2.22E+07 | 0.41 | 1.08 | 3.21 | 0.20 |
| E3 | TKW | 2D | AX.89473142 | 2.22E+07 | 0.41 | 1.08 | 3.21 | 0.20 |
| E3 | TKW | 2D | AX.89546398 | 2.22E+07 | 0.41 | 1.10 | 3.37 | 0.20 |
| E3 | TKW | 2D | AX.89577557 | 2.22E+07 | 0.40 | 1.15 | 3.63 | 0.21 |
| E3 | TKW | 2D | AX.89414549 | 2.22E+07 | 0.40 | 1.15 | 3.62 | 0.21 |
| E3 | TKW | 2D | AX.89712500 | 2.22E+07 | 0.35 | 1.34 | 4.00 | 0.24 |
| E3 | TKW | 2D | AX.89555008 | 2.22E+07 | 0.35 | 1.41 | 4.34 | 0.26 |
| E3 | TKW | 2D | AX.89564577 | 2.22E+07 | 0.36 | 1.32 | 3.82 | 0.24 |
| E3 | TKW | 2D | AX.89776372 | 2.23E+07 | 0.35 | 1.41 | 4.34 | 0.26 |
| E3 | TKW | 2D | AX.89481582 | 2.23E+07 | 0.35 | 1.36 | 4.07 | 0.25 |
| E3 | TKW | 2D | AX.89322073 | 2.23E+07 | 0.36 | 1.32 | 3.82 | 0.24 |
| E3 | TKW | 2D | AX.89477710 | 2.23E+07 | 0.35 | 1.34 | 4.00 | 0.24 |
| E3 | TKW | 2D | AX.89677081 | 2.23E+07 | 0.36 | 1.40 | 4.38 | 0.24 |
| E3 | TKW | 2D | AX.89755571 | 2.23E+07 | 0.35 | 1.16 | 3.32 | 0.22 |
| E3 | TKW | 2D | AX.89693607 | 2.23E+07 | 0.35 | 1.20 | 3.31 | 0.22 |
| E3 | TKW | 2D | AX.89354646 | 2.23E+07 | 0.35 | 1.34 | 4.00 | 0.24 |
| E3 | TKW | 2D | AX.89544290 | 2.23E+07 | 0.35 | 1.41 | 4.34 | 0.26 |
| E3 | TKW | 2D | AX.89467079 | 2.23E+07 | 0.35 | 1.34 | 4.00 | 0.24 |
| E3 | TKW | 2D | AX.89341306 | 2.23E+07 | 0.35 | 1.34 | 4.00 | 0.24 |
| E3 | TKW | 2D | AX.89491974 | 2.23E+07 | 0.35 | 1.34 | 4.00 | 0.24 |
| E3 | TKW | 2D | AX.89401879 | 2.23E+07 | 0.35 | 1.34 | 4.00 | 0.24 |
| E3 | TKW | 2D | AX.89345649 | 2.23E+07 | 0.35 | 1.39 | 4.25 | 0.25 |
| E3 | TKW | 2D | AX.89724416 | 2.23E+07 | 0.35 | 1.39 | 4.25 | 0.25 |
| E3 | TKW | 2D | AX.89520361 | 2.24E+07 | 0.36 | 1.32 | 3.82 | 0.24 |
| E3 | TKW | 2D | AX.89375022 | 2.24E+07 | 0.35 | 1.39 | 4.25 | 0.25 |
| E3 | TKW | 2D | AX.89743259 | 2.24E+07 | 0.35 | 1.34 | 4.00 | 0.24 |
| E3 | TKW | 2D | AX.89679854 | 2.24E+07 | 0.35 | 1.39 | 4.25 | 0.25 |
| E3 | TKW | 2D | AX.89617363 | 2.24E+07 | 0.35 | 1.39 | 4.25 | 0.25 |
| E3 | TKW | 2D | AX.89677114 | 2.24E+07 | 0.35 | 1.34 | 4.00 | 0.24 |
| E3 | TKW | 2D | AX.89687870 | 2.24E+07 | 0.35 | 1.31 | 3.82 | 0.24 |
| E3 | TKW | 2D | AX.89411109 | 2.24E+07 | 0.35 | 1.34 | 4.00 | 0.24 |
| E3 | TKW | 2D | AX.89478232 | 2.24E+07 | 0.35 | 1.36 | 4.16 | 0.25 |
| E3 | TKW | 2D | AX.89555850 | 2.24E+07 | 0.35 | 1.32 | 3.84 | 0.24 |
| E3 | TKW | 2D | AX.89588976 | 2.24E+07 | 0.36 | 1.32 | 3.82 | 0.24 |



|    |      |    |               |          |      |          |      |      |
|----|------|----|---------------|----------|------|----------|------|------|
| E3 | TKW  | 2D | AX.89403811   | 2.24E+07 | 0.35 | 1.34     | 4.00 | 0.24 |
| E3 | TKW  | 2D | AX.89752376   | 2.24E+07 | 0.36 | 1.32     | 3.82 | 0.24 |
| E3 | TKW  | 2D | AX.89745031   | 2.24E+07 | 0.35 | 1.48     | 4.92 | 0.26 |
| E3 | TKW  | 2D | AX.89704562   | 2.24E+07 | 0.36 | 1.32     | 3.82 | 0.24 |
| E3 | TKW  | 2D | AX.89366236   | 2.24E+07 | 0.35 | 1.37     | 4.16 | 0.25 |
| E3 | TKW  | 2D | AX.89674338   | 2.24E+07 | 0.35 | 1.34     | 4.00 | 0.24 |
| E3 | TKW  | 2D | AX.89607327   | 2.24E+07 | 0.35 | 1.34     | 4.00 | 0.24 |
| E3 | TKW  | 2D | AX.89648370   | 2.24E+07 | 0.34 | 1.35     | 4.06 | 0.25 |
| E3 | TKW  | 2D | AX.89754570   | 2.24E+07 | 0.36 | 1.40     | 4.33 | 0.25 |
| E3 | TKW  | 2D | AX.89557543   | 2.24E+07 | 0.35 | 1.34     | 4.00 | 0.24 |
| E3 | TKW  | 2D | AX.89596595   | 2.24E+07 | 0.35 | 1.34     | 4.00 | 0.24 |
| E3 | TKW  | 2D | AX.89687747   | 2.24E+07 | 0.35 | 1.34     | 4.00 | 0.24 |
| E3 | TKW  | 2D | AX.89345066   | 2.24E+07 | 0.35 | 1.34     | 4.00 | 0.24 |
| E3 | TKW  | 2D | AX.89354356   | 2.24E+07 | 0.35 | 1.34     | 4.00 | 0.24 |
| E3 | TKW  | 2D | AX.89414005   | 2.24E+07 | 0.40 | 1.03     | 3.04 | 0.19 |
| E3 | TKW  | 2D | AX.89753790   | 2.25E+07 | 0.38 | 1.13     | 3.32 | 0.23 |
| E3 | TKW  | 2D | AX.89476445   | 2.25E+07 | 0.36 | 1.19     | 3.40 | 0.23 |
| E3 | TKW  | 2D | AX.89721051   | 2.25E+07 | 0.36 | 1.19     | 3.37 | 0.23 |
| E3 | TKW  | 2D | AX.89344037   | 2.25E+07 | 0.36 | 1.24     | 3.60 | 0.23 |
| E3 | TKW  | 2D | AX.89314900   | 2.25E+07 | 0.36 | 1.35     | 4.27 | 0.24 |
| E3 | TKW  | 2D | AX.89578973   | 2.32E+07 | 0.35 | 1.23     | 3.55 | 0.23 |
| E3 | TKW  | 2D | AX.89393905   | 2.35E+07 | 0.31 | 1.25     | 3.29 | 0.24 |
| E3 | TKW  | 2D | AX.89549863   | 2.49E+07 | 0.32 | 1.12     | 3.13 | 0.21 |
| E3 | TKW  | 2D | AX.89429345   | 2.63E+07 | 0.35 | 1.45     | 5.61 | 0.23 |
| E3 | TKW  | 2D | AX.89728114   | 2.63E+07 | 0.37 | 1.42     | 5.39 | 0.22 |
| E3 | TKW  | 2D | AX.89693146   | 2.73E+07 | 0.35 | 1.33     | 4.72 | 0.21 |
| E3 | GPM2 | 2D | AX.89666819   | 2.16E+07 | 0.43 | -1025.44 | 3.07 | 0.12 |
| E3 | GPM2 | 2D | AX.89608814   | 2.16E+07 | 0.43 | -1025.44 | 3.07 | 0.12 |
| E3 | GPM2 | 2D | AX.89487867   | 3.42E+07 | 0.22 | 1159.05  | 3.99 | 0.07 |
| E3 | GPM2 | 2D | AX.89558081   | 3.47E+07 | 0.41 | -1075.90 | 3.21 | 0.13 |
| E3 | GPM2 | 2D | AX.89382235   | 3.50E+07 | 0.46 | 1011.73  | 3.52 | 0.14 |
| E3 | GPM2 | 2D | AX.89593262   | 5.12E+07 | 0.13 | 1394.89  | 3.55 | 0.11 |
| E3 | GPM2 | 2D | AX.89635453   | 5.49E+07 | 0.26 | 943.06   | 3.01 | 0.10 |
| E3 | GPM2 | 2D | AX.89384993   | 7.94E+07 | 0.27 | 940.53   | 3.02 | 0.07 |
| E3 | GPM2 | 2D | AX.89669389   | 7.94E+07 | 0.27 | 940.53   | 3.02 | 0.07 |
| E3 | GPM2 | 2D | AX.89584610   | 7.95E+07 | 0.27 | 940.53   | 3.02 | 0.07 |
| E3 | GPM2 | 2D | AX.89737163   | 7.95E+07 | 0.27 | 940.53   | 3.02 | 0.07 |
| E3 | GPM2 | 2D | X.89494294_OT | 6.38E+08 | 0.28 | -934.60  | 3.03 | 0.02 |
| E3 | TKW  | 2D | X.89629101_OT | 2.06E+07 | 0.36 | 1.42     | 4.56 | 0.25 |
| E3 | TKW  | 2D | AX.89436271   | 2.07E+07 | 0.36 | 1.26     | 3.76 | 0.24 |
| E3 | TKW  | 2D | AX.89710846   | 2.07E+07 | 0.44 | 1.06     | 3.39 | 0.20 |
| E3 | TKW  | 2D | AX.89538003   | 2.07E+07 | 0.44 | 1.06     | 3.39 | 0.20 |
| E3 | TKW  | 2D | AX.89518563   | 2.07E+07 | 0.44 | 1.06     | 3.39 | 0.20 |
| E3 | TKW  | 2D | AX.89351496   | 2.07E+07 | 0.44 | 1.06     | 3.39 | 0.20 |
| E3 | TKW  | 2D | AX.89480356   | 2.07E+07 | 0.44 | 1.06     | 3.39 | 0.20 |
| E3 | TKW  | 2D | AX.89685580   | 2.07E+07 | 0.43 | 1.05     | 3.38 | 0.19 |
| E3 | TKW  | 2D | AX.89418892   | 2.08E+07 | 0.43 | 1.17     | 4.00 | 0.21 |
| E3 | TKW  | 2D | AX.89320470   | 2.08E+07 | 0.42 | 1.15     | 3.76 | 0.21 |
| E3 | TKW  | 2D | AX.89768949   | 2.08E+07 | 0.42 | 1.15     | 3.76 | 0.21 |
| E3 | TKW  | 2D | AX.89366683   | 2.08E+07 | 0.41 | 1.04     | 3.16 | 0.20 |

|    |      |    |             |          |      |         |      |      |
|----|------|----|-------------|----------|------|---------|------|------|
| E3 | TKW  | 2D | AX.89382191 | 2.08E+07 | 0.42 | 1.15    | 3.76 | 0.21 |
| E3 | TKW  | 2D | AX.89702393 | 2.08E+07 | 0.42 | 1.15    | 3.76 | 0.21 |
| E3 | TKW  | 2D | AX.89339112 | 2.08E+07 | 0.42 | 1.12    | 3.63 | 0.20 |
| E3 | TKW  | 2D | AX.89682313 | 2.08E+07 | 0.42 | 1.15    | 3.76 | 0.21 |
| E3 | TKW  | 2D | AX.89331719 | 2.08E+07 | 0.44 | 1.00    | 3.11 | 0.19 |
| E3 | TKW  | 2D | AX.89435345 | 2.09E+07 | 0.42 | 1.18    | 3.96 | 0.22 |
| E3 | TKW  | 2D | AX.89700899 | 2.09E+07 | 0.42 | 1.15    | 3.76 | 0.21 |
| E3 | TKW  | 2D | AX.89386215 | 2.09E+07 | 0.42 | 1.18    | 3.96 | 0.22 |
| E3 | TKW  | 2D | AX.89330774 | 2.09E+07 | 0.42 | 1.14    | 3.70 | 0.21 |
| E3 | TKW  | 2D | AX.89469855 | 2.09E+07 | 0.42 | 1.15    | 3.76 | 0.21 |
| E3 | TKW  | 2D | AX.89394485 | 2.09E+07 | 0.43 | 1.16    | 3.72 | 0.22 |
| E3 | TKW  | 2D | AX.89709101 | 2.09E+07 | 0.42 | 1.15    | 3.76 | 0.21 |
| E3 | TKW  | 2D | AX.89552991 | 2.09E+07 | 0.42 | 1.15    | 3.76 | 0.21 |
| E3 | TKW  | 2D | AX.89422546 | 2.09E+07 | 0.42 | 1.15    | 3.76 | 0.21 |
| E3 | TKW  | 2D | AX.89429864 | 2.09E+07 | 0.42 | 1.15    | 3.76 | 0.21 |
| E3 | TKW  | 2D | AX.89331141 | 2.09E+07 | 0.42 | 1.15    | 3.76 | 0.21 |
| E3 | TKW  | 2D | AX.89398165 | 2.09E+07 | 0.42 | 1.15    | 3.76 | 0.21 |
| E3 | TKW  | 2D | AX.89581719 | 2.09E+07 | 0.41 | 1.11    | 3.69 | 0.21 |
| E3 | TKW  | 2D | AX.89449164 | 2.09E+07 | 0.42 | 1.15    | 3.76 | 0.21 |
| E3 | TKW  | 2D | AX.89353697 | 2.09E+07 | 0.42 | 1.15    | 3.76 | 0.21 |
| E3 | TKW  | 2D | AX.89617233 | 2.96E+07 | 0.34 | 1.31    | 4.15 | 0.22 |
| E3 | TKW  | 2D | AX.89487867 | 3.42E+07 | 0.22 | -1.08   | 3.64 | 0.08 |
| E3 | TKW  | 2D | AX.89558081 | 3.47E+07 | 0.41 | 1.20    | 3.99 | 0.20 |
| E3 | GY   | 2D | AX.89593262 | 5.12E+07 | 0.13 | 4.74    | 3.67 | 0.10 |
| E3 | SPM2 | 2D | AX.89635110 | 6.00E+08 | 0.06 | 41.30   | 3.16 | 0.08 |
| E3 | SPM2 | 2D | AX.89478998 | 6.08E+08 | 0.10 | -33.20  | 3.18 | 0.02 |
| E3 | SPM2 | 2D | AX.89564769 | 6.08E+08 | 0.10 | -33.20  | 3.18 | 0.02 |
| E3 | SPM2 | 2D | AX.89404429 | 6.08E+08 | 0.10 | -35.66  | 3.46 | 0.03 |
| E4 | GPM2 | 2D | AX.89558081 | 3.47E+07 | 0.41 | -625.72 | 4.19 | 0.11 |
| E4 | GPM2 | 2D | AX.89382235 | 3.50E+07 | 0.46 | 515.02  | 3.51 | 0.10 |
| E4 | GPS  | 2D | AX.89545944 | 1.83E+07 | 0.15 | 2.20    | 3.37 | 0.05 |
| E4 | TKW  | 2D | AX.89367033 | 2.16E+07 | 0.42 | 1.06    | 3.39 | 0.17 |
| E4 | TKW  | 2D | AX.89477763 | 2.16E+07 | 0.42 | 1.06    | 3.39 | 0.17 |
| E4 | TKW  | 2D | AX.89440072 | 2.16E+07 | 0.42 | 1.08    | 3.50 | 0.18 |
| E4 | TKW  | 2D | AX.89687536 | 2.16E+07 | 0.42 | 1.10    | 3.62 | 0.18 |
| E4 | TKW  | 2D | AX.89563629 | 2.16E+07 | 0.42 | 1.06    | 3.39 | 0.17 |
| E4 | TKW  | 2D | AX.89390584 | 2.16E+07 | 0.42 | 1.08    | 3.50 | 0.18 |
| E4 | TKW  | 2D | AX.89419142 | 2.16E+07 | 0.42 | 1.08    | 3.51 | 0.17 |
| E4 | TKW  | 2D | AX.89430147 | 2.16E+07 | 0.42 | 1.06    | 3.39 | 0.17 |
| E4 | TKW  | 2D | AX.89728485 | 2.16E+07 | 0.42 | 1.06    | 3.39 | 0.17 |
| E4 | TKW  | 2D | AX.89387802 | 2.16E+07 | 0.42 | 1.08    | 3.50 | 0.18 |
| E4 | TKW  | 2D | AX.89410112 | 2.16E+07 | 0.42 | 1.08    | 3.50 | 0.18 |
| E4 | TKW  | 2D | AX.89488513 | 2.16E+07 | 0.42 | 1.08    | 3.50 | 0.18 |
| E4 | TKW  | 2D | AX.89627631 | 2.16E+07 | 0.42 | 1.06    | 3.39 | 0.17 |
| E4 | TKW  | 2D | AX.89492844 | 2.16E+07 | 0.42 | 1.06    | 3.39 | 0.17 |
| E4 | TKW  | 2D | AX.89666819 | 2.16E+07 | 0.43 | 1.01    | 3.15 | 0.17 |
| E4 | TKW  | 2D | AX.89355761 | 2.16E+07 | 0.42 | 1.06    | 3.39 | 0.17 |
| E4 | TKW  | 2D | AX.89550995 | 2.16E+07 | 0.42 | 1.01    | 3.14 | 0.16 |
| E4 | TKW  | 2D | AX.89675693 | 2.16E+07 | 0.42 | 1.06    | 3.39 | 0.17 |
| E4 | TKW  | 2D | AX.89443581 | 2.16E+07 | 0.42 | 1.06    | 3.39 | 0.17 |

|    |     |    |               |          |      |       |      |      |
|----|-----|----|---------------|----------|------|-------|------|------|
| E4 | TKW | 2D | AX.89706536   | 2.16E+07 | 0.42 | 1.06  | 3.39 | 0.17 |
| E4 | TKW | 2D | AX.89317945   | 1.05E+07 | 0.22 | -1.03 | 3.26 | 0.07 |
| E4 | TKW | 2D | X.89491138_OT | 1.07E+07 | 0.22 | -1.03 | 3.26 | 0.07 |
| E4 | TKW | 2D | X.89629101_OT | 2.06E+07 | 0.36 | 1.20  | 3.54 | 0.20 |
| E4 | TKW | 2D | AX.89621969   | 2.07E+07 | 0.34 | -0.91 | 3.07 | 0.12 |
| E4 | TKW | 2D | AX.89606458   | 2.07E+07 | 0.40 | -0.93 | 3.08 | 0.12 |
| E4 | TKW | 2D | AX.89491215   | 2.07E+07 | 0.40 | -0.93 | 3.08 | 0.12 |
| E4 | TKW | 2D | AX.89418892   | 2.08E+07 | 0.43 | 1.00  | 3.12 | 0.17 |
| E4 | TKW | 2D | AX.89448778   | 2.08E+07 | 0.50 | 1.06  | 3.92 | 0.16 |
| E4 | TKW | 2D | AX.89320470   | 2.08E+07 | 0.42 | 1.06  | 3.39 | 0.17 |
| E4 | TKW | 2D | AX.89768949   | 2.08E+07 | 0.42 | 1.06  | 3.39 | 0.17 |
| E4 | TKW | 2D | AX.89382191   | 2.08E+07 | 0.42 | 1.06  | 3.39 | 0.17 |
| E4 | TKW | 2D | AX.89702393   | 2.08E+07 | 0.42 | 1.06  | 3.39 | 0.17 |
| E4 | TKW | 2D | AX.89339112   | 2.08E+07 | 0.42 | 1.03  | 3.21 | 0.17 |
| E4 | TKW | 2D | AX.89682313   | 2.08E+07 | 0.42 | 1.06  | 3.39 | 0.17 |
| E4 | TKW | 2D | AX.89435345   | 2.09E+07 | 0.42 | 1.08  | 3.50 | 0.18 |
| E4 | TKW | 2D | AX.89700899   | 2.09E+07 | 0.42 | 1.06  | 3.39 | 0.17 |
| E4 | TKW | 2D | AX.89386215   | 2.09E+07 | 0.42 | 1.08  | 3.50 | 0.18 |
| E4 | TKW | 2D | AX.89330774   | 2.09E+07 | 0.42 | 1.06  | 3.34 | 0.17 |
| E4 | TKW | 2D | AX.89469855   | 2.09E+07 | 0.42 | 1.06  | 3.39 | 0.17 |
| E4 | TKW | 2D | AX.89394485   | 2.09E+07 | 0.43 | 1.08  | 3.39 | 0.18 |
| E4 | TKW | 2D | AX.89709101   | 2.09E+07 | 0.42 | 1.06  | 3.39 | 0.17 |
| E4 | TKW | 2D | AX.89552991   | 2.09E+07 | 0.42 | 1.06  | 3.39 | 0.17 |
| E4 | TKW | 2D | AX.89422546   | 2.09E+07 | 0.42 | 1.06  | 3.39 | 0.17 |
| E4 | TKW | 2D | AX.89429864   | 2.09E+07 | 0.42 | 1.06  | 3.39 | 0.17 |
| E4 | TKW | 2D | AX.89331141   | 2.09E+07 | 0.42 | 1.06  | 3.39 | 0.17 |
| E4 | TKW | 2D | AX.89398165   | 2.09E+07 | 0.42 | 1.06  | 3.39 | 0.17 |
| E4 | TKW | 2D | AX.89581719   | 2.09E+07 | 0.41 | 1.01  | 3.23 | 0.17 |
| E4 | TKW | 2D | AX.89449164   | 2.09E+07 | 0.42 | 1.06  | 3.39 | 0.17 |
| E4 | TKW | 2D | AX.89353697   | 2.09E+07 | 0.42 | 1.06  | 3.39 | 0.17 |
| E4 | TKW | 2D | AX.89506509   | 2.09E+07 | 0.42 | 1.01  | 3.09 | 0.17 |
| E4 | TKW | 2D | AX.89693001   | 2.09E+07 | 0.42 | 1.08  | 3.50 | 0.18 |
| E4 | TKW | 2D | AX.89389022   | 2.09E+07 | 0.42 | 1.06  | 3.39 | 0.17 |
| E4 | TKW | 2D | AX.89685659   | 2.09E+07 | 0.43 | 1.06  | 3.32 | 0.17 |
| E4 | TKW | 2D | AX.89524929   | 2.10E+07 | 0.42 | 1.06  | 3.39 | 0.17 |
| E4 | TKW | 2D | AX.89320828   | 2.10E+07 | 0.42 | 1.06  | 3.39 | 0.17 |
| E4 | TKW | 2D | AX.89552766   | 2.10E+07 | 0.42 | 0.99  | 3.04 | 0.16 |
| E4 | TKW | 2D | AX.89436775   | 2.13E+07 | 0.43 | 1.06  | 3.32 | 0.17 |
| E4 | TKW | 2D | AX.89414365   | 2.15E+07 | 0.42 | 1.06  | 3.39 | 0.17 |
| E4 | TKW | 2D | AX.89445253   | 2.15E+07 | 0.42 | 1.06  | 3.39 | 0.17 |
| E4 | TKW | 2D | AX.89680110   | 2.15E+07 | 0.42 | 1.06  | 3.39 | 0.17 |
| E4 | TKW | 2D | AX.89735804   | 2.15E+07 | 0.42 | 1.06  | 3.39 | 0.17 |
| E4 | TKW | 2D | AX.89399410   | 2.15E+07 | 0.42 | 1.06  | 3.39 | 0.17 |
| E4 | TKW | 2D | AX.89589257   | 2.15E+07 | 0.42 | 1.06  | 3.39 | 0.17 |
| E4 | TKW | 2D | AX.89428087   | 2.15E+07 | 0.42 | 1.01  | 3.11 | 0.17 |
| E4 | TKW | 2D | AX.89679130   | 2.21E+07 | 0.42 | 1.06  | 3.39 | 0.17 |
| E4 | TKW | 2D | AX.89388871   | 2.22E+07 | 0.41 | 1.04  | 3.19 | 0.16 |
| E4 | TKW | 2D | AX.89503845   | 2.22E+07 | 0.41 | 1.04  | 3.19 | 0.16 |
| E4 | TKW | 2D | AX.89576820   | 2.22E+07 | 0.41 | 1.04  | 3.11 | 0.16 |
| E4 | TKW | 2D | AX.89473142   | 2.22E+07 | 0.41 | 1.04  | 3.11 | 0.16 |

|    |     |    |             |          |      |      |      |      |
|----|-----|----|-------------|----------|------|------|------|------|
| E4 | TKW | 2D | AX.89546398 | 2.22E+07 | 0.41 | 1.04 | 3.19 | 0.16 |
| E4 | TKW | 2D | AX.89712500 | 2.22E+07 | 0.35 | 1.25 | 3.67 | 0.20 |
| E4 | TKW | 2D | AX.89555008 | 2.22E+07 | 0.35 | 1.17 | 3.22 | 0.20 |
| E4 | TKW | 2D | AX.89564577 | 2.22E+07 | 0.36 | 1.25 | 3.60 | 0.20 |
| E4 | TKW | 2D | AX.89776372 | 2.23E+07 | 0.35 | 1.17 | 3.22 | 0.20 |
| E4 | TKW | 2D | AX.89481582 | 2.23E+07 | 0.35 | 1.18 | 3.31 | 0.20 |
| E4 | TKW | 2D | AX.89322073 | 2.23E+07 | 0.36 | 1.25 | 3.60 | 0.20 |
| E4 | TKW | 2D | AX.89477710 | 2.23E+07 | 0.35 | 1.25 | 3.67 | 0.20 |
| E4 | TKW | 2D | AX.89677081 | 2.23E+07 | 0.36 | 1.31 | 4.04 | 0.20 |
| E4 | TKW | 2D | AX.89755571 | 2.23E+07 | 0.35 | 1.15 | 3.36 | 0.18 |
| E4 | TKW | 2D | AX.89693607 | 2.23E+07 | 0.35 | 1.11 | 3.01 | 0.18 |
| E4 | TKW | 2D | AX.89354646 | 2.23E+07 | 0.35 | 1.25 | 3.67 | 0.20 |
| E4 | TKW | 2D | AX.89544290 | 2.23E+07 | 0.35 | 1.17 | 3.22 | 0.20 |
| E4 | TKW | 2D | AX.89467079 | 2.23E+07 | 0.35 | 1.25 | 3.67 | 0.20 |
| E4 | TKW | 2D | AX.89341306 | 2.23E+07 | 0.35 | 1.25 | 3.67 | 0.20 |
| E4 | TKW | 2D | AX.89456760 | 2.16E+07 | 0.42 | 1.06 | 3.39 | 0.17 |
| E4 | TKW | 2D | AX.89777059 | 2.16E+07 | 0.42 | 1.06 | 3.39 | 0.17 |
| E4 | TKW | 2D | AX.89667231 | 2.16E+07 | 0.42 | 1.06 | 3.39 | 0.17 |
| E4 | TKW | 2D | AX.89429599 | 2.16E+07 | 0.42 | 1.06 | 3.39 | 0.17 |
| E4 | TKW | 2D | AX.89637527 | 2.16E+07 | 0.42 | 1.06 | 3.39 | 0.17 |
| E4 | TKW | 2D | AX.89608814 | 2.16E+07 | 0.43 | 1.01 | 3.15 | 0.17 |
| E4 | TKW | 2D | AX.89680314 | 2.17E+07 | 0.42 | 1.06 | 3.39 | 0.17 |
| E4 | TKW | 2D | AX.89644595 | 2.18E+07 | 0.42 | 1.06 | 3.39 | 0.17 |
| E4 | TKW | 2D | AX.89380548 | 2.18E+07 | 0.42 | 1.06 | 3.39 | 0.17 |
| E4 | TKW | 2D | AX.89411657 | 2.18E+07 | 0.42 | 0.99 | 3.03 | 0.17 |
| E4 | TKW | 2D | AX.89729498 | 2.19E+07 | 0.42 | 1.06 | 3.39 | 0.17 |
| E4 | TKW | 2D | AX.89332538 | 2.19E+07 | 0.42 | 1.06 | 3.39 | 0.17 |
| E4 | TKW | 2D | AX.89682149 | 2.19E+07 | 0.42 | 1.06 | 3.39 | 0.17 |
| E4 | TKW | 2D | AX.89464478 | 2.19E+07 | 0.42 | 1.06 | 3.39 | 0.17 |
| E4 | TKW | 2D | AX.89382211 | 2.19E+07 | 0.42 | 1.06 | 3.39 | 0.17 |
| E4 | TKW | 2D | AX.89771438 | 2.21E+07 | 0.42 | 1.06 | 3.39 | 0.17 |
| E4 | TKW | 2D | AX.89616561 | 2.21E+07 | 0.42 | 1.06 | 3.39 | 0.17 |
| E4 | TKW | 2D | AX.89725607 | 2.21E+07 | 0.42 | 1.06 | 3.39 | 0.17 |
| E4 | TKW | 2D | AX.89721153 | 2.21E+07 | 0.42 | 1.06 | 3.39 | 0.17 |
| E4 | TKW | 2D | AX.89716105 | 2.21E+07 | 0.42 | 1.06 | 3.39 | 0.17 |
| E4 | TKW | 2D | AX.89674338 | 2.24E+07 | 0.35 | 1.25 | 3.67 | 0.20 |
| E4 | TKW | 2D | AX.89607327 | 2.24E+07 | 0.35 | 1.25 | 3.67 | 0.20 |
| E4 | TKW | 2D | AX.89648370 | 2.24E+07 | 0.34 | 1.32 | 3.99 | 0.21 |
| E4 | TKW | 2D | AX.89754570 | 2.24E+07 | 0.36 | 1.24 | 3.65 | 0.20 |
| E4 | TKW | 2D | AX.89557543 | 2.24E+07 | 0.35 | 1.25 | 3.67 | 0.20 |
| E4 | TKW | 2D | AX.89596595 | 2.24E+07 | 0.35 | 1.25 | 3.67 | 0.20 |
| E4 | TKW | 2D | AX.89687747 | 2.24E+07 | 0.35 | 1.25 | 3.67 | 0.20 |
| E4 | TKW | 2D | AX.89345066 | 2.24E+07 | 0.35 | 1.25 | 3.67 | 0.20 |
| E4 | TKW | 2D | AX.89354356 | 2.24E+07 | 0.35 | 1.25 | 3.67 | 0.20 |
| E4 | TKW | 2D | AX.89476445 | 2.25E+07 | 0.36 | 1.10 | 3.05 | 0.18 |
| E4 | TKW | 2D | AX.89344037 | 2.25E+07 | 0.36 | 1.15 | 3.23 | 0.19 |
| E4 | TKW | 2D | AX.89314900 | 2.25E+07 | 0.36 | 1.15 | 3.31 | 0.19 |
| E4 | TKW | 2D | AX.89578973 | 2.32E+07 | 0.35 | 1.24 | 3.70 | 0.20 |
| E4 | TKW | 2D | AX.89393905 | 2.35E+07 | 0.31 | 1.24 | 3.36 | 0.19 |
| E4 | TKW | 2D | AX.89549863 | 2.49E+07 | 0.32 | 1.18 | 3.49 | 0.18 |

|    |      |    |             |          |      |       |      |      |
|----|------|----|-------------|----------|------|-------|------|------|
| E4 | TKW  | 2D | AX.89429345 | 2.63E+07 | 0.35 | 1.23  | 4.33 | 0.19 |
| E4 | TKW  | 2D | AX.89728114 | 2.63E+07 | 0.37 | 1.40  | 5.38 | 0.20 |
| E4 | TKW  | 2D | AX.89693146 | 2.73E+07 | 0.35 | 1.44  | 5.58 | 0.21 |
| E4 | TKW  | 2D | AX.89647365 | 2.79E+07 | 0.20 | -1.20 | 3.92 | 0.11 |
| E4 | TKW  | 2D | AX.89408510 | 2.79E+07 | 0.20 | -1.18 | 3.88 | 0.11 |
| E4 | TKW  | 2D | AX.89491974 | 2.23E+07 | 0.35 | 1.25  | 3.67 | 0.20 |
| E4 | TKW  | 2D | AX.89401879 | 2.23E+07 | 0.35 | 1.25  | 3.67 | 0.20 |
| E4 | TKW  | 2D | AX.89345649 | 2.23E+07 | 0.35 | 1.28  | 3.81 | 0.21 |
| E4 | TKW  | 2D | AX.89724416 | 2.23E+07 | 0.35 | 1.28  | 3.81 | 0.21 |
| E4 | TKW  | 2D | AX.89520361 | 2.24E+07 | 0.36 | 1.25  | 3.60 | 0.20 |
| E4 | TKW  | 2D | AX.89375022 | 2.24E+07 | 0.35 | 1.28  | 3.81 | 0.21 |
| E4 | TKW  | 2D | AX.89743259 | 2.24E+07 | 0.35 | 1.25  | 3.67 | 0.20 |
| E4 | TKW  | 2D | AX.89679854 | 2.24E+07 | 0.35 | 1.28  | 3.81 | 0.21 |
| E4 | TKW  | 2D | AX.89617363 | 2.24E+07 | 0.35 | 1.28  | 3.81 | 0.21 |
| E4 | TKW  | 2D | AX.89677114 | 2.24E+07 | 0.35 | 1.25  | 3.67 | 0.20 |
| E4 | TKW  | 2D | AX.89687870 | 2.24E+07 | 0.35 | 1.27  | 3.75 | 0.20 |
| E4 | TKW  | 2D | AX.89411109 | 2.24E+07 | 0.35 | 1.25  | 3.67 | 0.20 |
| E4 | TKW  | 2D | AX.89478232 | 2.24E+07 | 0.35 | 1.21  | 3.51 | 0.20 |
| E4 | TKW  | 2D | AX.89555850 | 2.24E+07 | 0.35 | 1.24  | 3.57 | 0.20 |
| E4 | TKW  | 2D | AX.89588976 | 2.24E+07 | 0.36 | 1.25  | 3.60 | 0.20 |
| E4 | TKW  | 2D | AX.89403811 | 2.24E+07 | 0.35 | 1.25  | 3.67 | 0.20 |
| E4 | TKW  | 2D | AX.89752376 | 2.24E+07 | 0.36 | 1.25  | 3.60 | 0.20 |
| E4 | TKW  | 2D | AX.89745031 | 2.24E+07 | 0.35 | 1.37  | 4.42 | 0.21 |
| E4 | TKW  | 2D | AX.89704562 | 2.24E+07 | 0.36 | 1.25  | 3.60 | 0.20 |
| E4 | TKW  | 2D | AX.89366236 | 2.24E+07 | 0.35 | 1.28  | 3.77 | 0.21 |
| E4 | TKW  | 2D | AX.89669389 | 7.94E+07 | 0.27 | -1.10 | 4.15 | 0.09 |
| E4 | TKW  | 2D | AX.89584610 | 7.95E+07 | 0.27 | -1.10 | 4.15 | 0.09 |
| E4 | TKW  | 2D | AX.89737163 | 7.95E+07 | 0.27 | -1.10 | 4.15 | 0.09 |
| E4 | TKW  | 2D | AX.89654955 | 7.95E+07 | 0.27 | -1.10 | 4.20 | 0.09 |
| E4 | TKW  | 2D | AX.89313540 | 7.98E+07 | 0.27 | -1.13 | 4.39 | 0.09 |
| E4 | TKW  | 2D | AX.89338432 | 7.98E+07 | 0.28 | -1.05 | 3.91 | 0.09 |
| E4 | TKW  | 2D | AX.89441180 | 2.80E+07 | 0.29 | 1.23  | 3.85 | 0.17 |
| E4 | TKW  | 2D | AX.89617233 | 2.96E+07 | 0.34 | 1.65  | 6.42 | 0.24 |
| E4 | TKW  | 2D | AX.89558081 | 3.47E+07 | 0.41 | 1.85  | 8.97 | 0.27 |
| E4 | TKW  | 2D | AX.89382235 | 3.50E+07 | 0.46 | -1.30 | 5.72 | 0.15 |
| E4 | TKW  | 2D | AX.89371003 | 3.71E+07 | 0.20 | 1.42  | 4.63 | 0.07 |
| E4 | TKW  | 2D | AX.89384993 | 7.94E+07 | 0.27 | -1.10 | 4.15 | 0.09 |
| E1 | GY   | 3A | AX.89517433 | 5.57E+07 | 0.37 | -2.50 | 3.45 | 0.06 |
| E1 | GY   | 3A | AX.89596917 | 5.62E+07 | 0.38 | -2.49 | 3.45 | 0.06 |
| E1 | GY   | 3A | AX.89410914 | 5.70E+07 | 0.38 | -2.49 | 3.45 | 0.06 |
| E1 | GY   | 3A | AX.86166408 | 7.19E+08 | 0.46 | -2.29 | 3.12 | 0.04 |
| E1 | GY   | 3A | AX.89351757 | 7.11E+08 | 0.20 | 2.83  | 3.12 | 0.05 |
| E1 | GY   | 3A | AX.89410914 | 5.70E+07 | 0.38 | -2.49 | 3.45 | 0.06 |
| E1 | SPM2 | 3A | AX.89449366 | 2.36E+07 | 0.12 | 28.09 | 3.73 | 0.07 |
| E1 | GY   | 3A | AX.89344030 | 5.71E+07 | 0.37 | -2.77 | 4.08 | 0.07 |
| E1 | GY   | 3A | AX.89413279 | 7.19E+08 | 0.46 | -2.29 | 3.12 | 0.04 |
| E1 | GY   | 3A | AX.89529890 | 6.93E+07 | 0.33 | -2.43 | 3.14 | 0.05 |
| E1 | GY   | 3A | AX.89436052 | 5.70E+07 | 0.38 | -2.49 | 3.45 | 0.06 |
| E1 | GY   | 3A | AX.89529890 | 6.93E+07 | 0.33 | -2.43 | 3.14 | 0.05 |
| E1 | GY   | 3A | AX.89471245 | 1.02E+07 | 0.32 | 2.60  | 3.47 | 0.06 |

|    |      |    |             |          |      |       |      |      |
|----|------|----|-------------|----------|------|-------|------|------|
| E1 | GY   | 3A | AX.89416077 | 5.70E+07 | 0.38 | -2.49 | 3.45 | 0.06 |
| E1 | GY   | 3A | AX.89587804 | 7.11E+08 | 0.20 | 2.83  | 3.12 | 0.05 |
| E1 | GY   | 3A | AX.86166408 | 7.19E+08 | 0.46 | -2.29 | 3.12 | 0.04 |
| E1 | GY   | 3A | AX.89436052 | 5.70E+07 | 0.38 | -2.49 | 3.45 | 0.06 |
| E1 | GY   | 3A | AX.89563886 | 5.17E+08 | 0.05 | -6.25 | 3.98 | 0.08 |
| E1 | GY   | 3A | AX.89313133 | 5.67E+07 | 0.38 | -2.49 | 3.45 | 0.06 |
| E1 | GY   | 3A | AX.89351757 | 7.11E+08 | 0.20 | 2.83  | 3.12 | 0.05 |
| E1 | GY   | 3A | AX.89386202 | 7.11E+08 | 0.26 | 2.68  | 3.25 | 0.06 |
| E1 | GY   | 3A | AX.89468914 | 5.68E+07 | 0.37 | -2.50 | 3.45 | 0.06 |
| E1 | GY   | 3A | AX.89373966 | 5.64E+07 | 0.37 | -2.50 | 3.45 | 0.06 |
| E1 | GY   | 3A | AX.89414890 | 5.67E+07 | 0.39 | -2.39 | 3.24 | 0.05 |
| E1 | GY   | 3A | AX.89337319 | 7.11E+08 | 0.06 | -6.47 | 5.27 | 0.09 |
| E1 | GY   | 3A | AX.89471245 | 1.02E+07 | 0.32 | 2.60  | 3.47 | 0.06 |
| E1 | GY   | 3A | AX.89775578 | 5.61E+07 | 0.38 | -2.49 | 3.45 | 0.06 |
| E1 | SPM2 | 3A | AX.89519149 | 2.36E+07 | 0.12 | 28.09 | 3.73 | 0.07 |
| E1 | GY   | 3A | AX.89735763 | 5.67E+07 | 0.37 | -2.50 | 3.45 | 0.06 |
| E1 | GY   | 3A | AX.89312238 | 1.35E+08 | 0.09 | -4.28 | 3.47 | 0.05 |
| E1 | GY   | 3A | AX.89450737 | 5.70E+07 | 0.37 | -2.50 | 3.45 | 0.06 |
| E1 | GY   | 3A | AX.89389379 | 7.11E+08 | 0.06 | -4.99 | 3.35 | 0.05 |
| E1 | GY   | 3A | AX.89389379 | 7.11E+08 | 0.06 | -4.99 | 3.35 | 0.05 |
| E1 | SPM2 | 3A | AX.89391363 | 2.36E+07 | 0.12 | 28.09 | 3.73 | 0.07 |
| E1 | GY   | 3A | AX.89411579 | 6.38E+08 | 0.41 | 2.28  | 3.04 | 0.05 |
| E1 | GY   | 3A | AX.89517433 | 5.57E+07 | 0.37 | -2.50 | 3.45 | 0.06 |
| E1 | GY   | 3A | AX.89411579 | 6.38E+08 | 0.41 | 2.28  | 3.04 | 0.05 |
| E1 | SPM2 | 3A | AX.89599951 | 2.36E+07 | 0.12 | 28.09 | 3.73 | 0.07 |
| E1 | GY   | 3A | AX.89599243 | 7.11E+08 | 0.07 | -5.26 | 4.12 | 0.07 |
| E1 | GY   | 3A | AX.89427924 | 5.61E+07 | 0.37 | -2.50 | 3.45 | 0.06 |
| E1 | SPM2 | 3A | AX.89768349 | 2.36E+07 | 0.12 | 28.09 | 3.73 | 0.07 |
| E1 | GY   | 3A | AX.89337319 | 7.11E+08 | 0.06 | -6.47 | 5.27 | 0.09 |
| E1 | GY   | 3A | AX.89404755 | 7.11E+08 | 0.24 | 3.52  | 5.00 | 0.09 |
| E1 | SPM2 | 3A | AX.89573701 | 2.32E+07 | 0.09 | 34.31 | 4.31 | 0.08 |
| E1 | GY   | 3A | AX.89329876 | 1.18E+07 | 0.32 | 2.41  | 3.04 | 0.05 |
| E1 | GY   | 3A | AX.89673565 | 2.17E+05 | 0.34 | 2.44  | 3.19 | 0.06 |
| E1 | GY   | 3A | AX.89373966 | 5.64E+07 | 0.37 | -2.50 | 3.45 | 0.06 |
| E1 | SPM2 | 3A | AX.89538706 | 2.35E+07 | 0.09 | 31.32 | 3.68 | 0.07 |
| E1 | GY   | 3A | AX.89414890 | 5.67E+07 | 0.39 | -2.39 | 3.24 | 0.05 |
| E1 | GY   | 3A | AX.89405834 | 6.34E+08 | 0.47 | -2.47 | 3.56 | 0.06 |
| E1 | GY   | 3A | AX.89684384 | 5.70E+07 | 0.38 | -2.49 | 3.45 | 0.06 |
| E1 | GY   | 3A | AX.89463175 | 5.61E+07 | 0.38 | -2.49 | 3.45 | 0.06 |
| E1 | GY   | 3A | AX.89437855 | 5.68E+07 | 0.38 | -2.61 | 3.72 | 0.06 |
| E1 | GY   | 3A | AX.89512498 | 5.68E+07 | 0.37 | -2.50 | 3.45 | 0.06 |
| E1 | GY   | 3A | AX.89744040 | 5.16E+08 | 0.05 | -5.81 | 3.79 | 0.07 |
| E1 | SPM2 | 3A | AX.89340976 | 2.36E+07 | 0.12 | 28.09 | 3.73 | 0.07 |
| E1 | GY   | 3A | AX.89476226 | 5.70E+07 | 0.38 | -2.49 | 3.45 | 0.06 |
| E1 | GY   | 3A | AX.89740070 | 7.12E+08 | 0.20 | 2.83  | 3.12 | 0.05 |
| E1 | GY   | 3A | AX.89463175 | 5.61E+07 | 0.38 | -2.49 | 3.45 | 0.06 |
| E1 | GY   | 3A | AX.89437855 | 5.68E+07 | 0.38 | -2.61 | 3.72 | 0.06 |
| E1 | GY   | 3A | AX.89322989 | 5.44E+08 | 0.05 | -5.81 | 3.79 | 0.07 |
| E1 | GY   | 3A | AX.89450737 | 5.70E+07 | 0.37 | -2.50 | 3.45 | 0.06 |
| E1 | GY   | 3A | AX.89422432 | 1.15E+07 | 0.31 | 2.54  | 3.26 | 0.06 |

|    |      |    |             |          |      |        |      |      |
|----|------|----|-------------|----------|------|--------|------|------|
| E1 | GY   | 3A | AX.89348668 | 6.40E+08 | 0.13 | -3.61  | 3.48 | 0.05 |
| E1 | GY   | 3A | AX.89344030 | 5.71E+07 | 0.37 | -2.77  | 4.08 | 0.07 |
| E1 | GY   | 3A | AX.89312843 | 5.67E+07 | 0.38 | -2.49  | 3.45 | 0.06 |
| E1 | GY   | 3A | AX.89396715 | 6.59E+08 | 0.29 | 2.60   | 3.30 | 0.06 |
| E1 | GY   | 3A | AX.89461923 | 5.61E+07 | 0.38 | -2.52  | 3.50 | 0.06 |
| E1 | GY   | 3A | AX.89345333 | 5.62E+07 | 0.37 | -2.50  | 3.45 | 0.06 |
| E1 | GY   | 3A | AX.89392516 | 2.27E+05 | 0.50 | 2.51   | 3.67 | 0.06 |
| E1 | SPM2 | 3A | AX.89584828 | 2.36E+07 | 0.12 | 28.09  | 3.73 | 0.07 |
| E1 | GY   | 3A | AX.89742601 | 6.59E+08 | 0.21 | 3.27   | 4.13 | 0.07 |
| E1 | SPM2 | 3A | AX.89635508 | 2.34E+07 | 0.09 | 31.32  | 3.68 | 0.07 |
| E1 | GY   | 3A | AX.89318922 | 5.67E+07 | 0.37 | -2.50  | 3.45 | 0.06 |
| E1 | GY   | 3A | AX.89320189 | 5.61E+07 | 0.38 | -2.49  | 3.45 | 0.06 |
| E1 | GY   | 3A | AX.89669221 | 7.11E+08 | 0.20 | 2.83   | 3.12 | 0.05 |
| E1 | GY   | 3A | AX.89415949 | 7.11E+08 | 0.07 | -6.05  | 4.97 | 0.08 |
| E1 | SPM2 | 3A | AX.89753864 | 2.34E+07 | 0.09 | 31.32  | 3.68 | 0.07 |
| E1 | GY   | 3A | AX.89475487 | 5.67E+07 | 0.37 | -2.50  | 3.45 | 0.06 |
| E1 | GY   | 3A | AX.89410438 | 2.25E+05 | 0.50 | -2.33  | 3.24 | 0.04 |
| E1 | SPM2 | 3A | AX.89587445 | 2.31E+07 | 0.10 | 30.49  | 3.65 | 0.07 |
| E1 | GY   | 3A | AX.89320950 | 6.59E+08 | 0.21 | 3.18   | 3.86 | 0.07 |
| E1 | GY   | 3A | AX.89658110 | 5.70E+07 | 0.38 | -2.49  | 3.45 | 0.06 |
| E1 | GY   | 3A | AX.89312238 | 1.35E+08 | 0.09 | -4.28  | 3.47 | 0.05 |
| E1 | GY   | 3A | AX.89335688 | 7.11E+08 | 0.07 | -5.26  | 4.12 | 0.07 |
| E1 | GY   | 3A | AX.89386202 | 7.11E+08 | 0.26 | 2.68   | 3.25 | 0.06 |
| E1 | GY   | 3A | AX.89398270 | 5.67E+07 | 0.37 | -2.50  | 3.45 | 0.06 |
| E1 | GY   | 3A | AX.89540978 | 5.44E+08 | 0.05 | -6.25  | 3.98 | 0.08 |
| E1 | SPM2 | 3A | AX.89516485 | 6.86E+08 | 0.27 | 21.85  | 4.12 | 0.08 |
| E1 | GY   | 3A | AX.89322500 | 5.62E+07 | 0.38 | -2.49  | 3.45 | 0.06 |
| E1 | GY   | 3A | AX.89336419 | 7.12E+08 | 0.20 | 2.83   | 3.12 | 0.05 |
| E1 | GY   | 3A | AX.89446558 | 7.11E+08 | 0.07 | -6.05  | 4.97 | 0.08 |
| E1 | GY   | 3A | AX.89599243 | 7.11E+08 | 0.07 | -5.26  | 4.12 | 0.07 |
| E1 | GY   | 3A | AX.89329876 | 1.18E+07 | 0.32 | 2.41   | 3.04 | 0.05 |
| E1 | GY   | 3A | AX.89630559 | 2.13E+05 | 0.35 | 2.38   | 3.10 | 0.05 |
| E1 | GY   | 3A | AX.89465002 | 2.08E+05 | 0.35 | 2.40   | 3.14 | 0.06 |
| E1 | GY   | 3A | AX.89521839 | 7.11E+08 | 0.25 | 2.58   | 3.02 | 0.05 |
| E1 | GY   | 3A | AX.89412798 | 7.11E+08 | 0.20 | 2.83   | 3.12 | 0.05 |
| E1 | SPM2 | 3A | AX.89679071 | 2.36E+07 | 0.12 | 28.09  | 3.73 | 0.07 |
| E1 | GY   | 3A | AX.89631332 | 6.60E+08 | 0.24 | 2.83   | 3.41 | 0.06 |
| E1 | GY   | 3A | AX.89413279 | 7.19E+08 | 0.46 | -2.29  | 3.12 | 0.04 |
| E1 | SPM2 | 3A | AX.89669278 | 7.26E+08 | 0.23 | -19.66 | 3.15 | 0.05 |
| E1 | GY   | 3A | AX.89596917 | 5.62E+07 | 0.38 | -2.49  | 3.45 | 0.06 |
| E1 | GY   | 3A | AX.89564968 | 6.59E+08 | 0.29 | 2.50   | 3.09 | 0.05 |
| E1 | GY   | 3A | AX.89424557 | 5.71E+07 | 0.38 | -2.49  | 3.45 | 0.06 |
| E1 | GY   | 3A | AX.89471074 | 7.19E+08 | 0.46 | -2.29  | 3.12 | 0.04 |
| E1 | GY   | 3A | AX.89402066 | 7.19E+08 | 0.22 | -3.89  | 5.69 | 0.10 |
| E1 | GY   | 3A | AX.89338545 | 5.71E+07 | 0.38 | -2.49  | 3.45 | 0.06 |
| E1 | SPM2 | 3A | AX.89394999 | 2.34E+07 | 0.09 | 30.57  | 3.54 | 0.06 |
| E1 | GY   | 3A | AX.89402456 | 7.11E+08 | 0.24 | 3.52   | 5.00 | 0.09 |
| E1 | GY   | 3A | AX.89358928 | 5.71E+07 | 0.38 | -2.49  | 3.45 | 0.06 |
| E1 | GY   | 3A | AX.89613894 | 7.11E+08 | 0.07 | -6.16  | 5.13 | 0.08 |
| E1 | GY   | 3A | AX.89422432 | 1.15E+07 | 0.31 | 2.54   | 3.26 | 0.06 |

|    |      |    |             |          |      |       |      |      |
|----|------|----|-------------|----------|------|-------|------|------|
| E1 | GY   | 3A | AX.89577654 | 6.59E+08 | 0.29 | 2.60  | 3.30 | 0.06 |
| E1 | GY   | 3A | AX.89322500 | 5.62E+07 | 0.38 | -2.49 | 3.45 | 0.06 |
| E1 | GY   | 3A | AX.89412117 | 5.16E+08 | 0.05 | -5.81 | 3.79 | 0.07 |
| E1 | GY   | 3A | AX.89431563 | 7.12E+08 | 0.20 | 2.83  | 3.12 | 0.05 |
| E1 | GY   | 3A | AX.89684173 | 7.12E+08 | 0.20 | 2.83  | 3.12 | 0.05 |
| E1 | GY   | 3A | AX.89412798 | 7.11E+08 | 0.20 | 2.83  | 3.12 | 0.05 |
| E1 | GY   | 3A | AX.89587706 | 1.78E+05 | 0.35 | -2.46 | 3.29 | 0.05 |
| E1 | GY   | 3A | AX.89591989 | 7.12E+08 | 0.20 | 2.83  | 3.12 | 0.05 |
| E1 | GY   | 3A | AX.89404755 | 7.11E+08 | 0.24 | 3.52  | 5.00 | 0.09 |
| E1 | SPM2 | 3A | AX.89312604 | 2.34E+07 | 0.10 | 30.49 | 3.65 | 0.07 |
| E1 | GY   | 3A | AX.89334033 | 5.71E+07 | 0.38 | -2.49 | 3.45 | 0.06 |
| E1 | GY   | 3A | AX.89405051 | 6.59E+08 | 0.29 | 2.60  | 3.30 | 0.06 |
| E1 | GY   | 3A | AX.89405051 | 6.59E+08 | 0.29 | 2.60  | 3.30 | 0.06 |
| E1 | GY   | 3A | AX.89530250 | 5.67E+07 | 0.37 | -2.50 | 3.45 | 0.06 |
| E1 | GY   | 3A | AX.89673565 | 2.17E+05 | 0.34 | 2.44  | 3.19 | 0.06 |
| E1 | GY   | 3A | AX.89334290 | 1.15E+07 | 0.23 | 3.00  | 3.73 | 0.07 |
| E1 | GY   | 3A | AX.89320189 | 5.61E+07 | 0.38 | -2.49 | 3.45 | 0.06 |
| E1 | GY   | 3A | AX.89338545 | 5.71E+07 | 0.38 | -2.49 | 3.45 | 0.06 |
| E1 | GY   | 3A | AX.89727293 | 6.93E+07 | 0.33 | -2.43 | 3.14 | 0.05 |
| E1 | GY   | 3A | AX.89538282 | 5.64E+07 | 0.38 | -2.49 | 3.45 | 0.06 |
| E1 | GY   | 3A | AX.89531199 | 5.57E+07 | 0.37 | -2.50 | 3.45 | 0.06 |
| E1 | GY   | 3A | AX.89534837 | 5.70E+07 | 0.38 | -2.49 | 3.45 | 0.06 |
| E1 | GY   | 3A | AX.89355033 | 7.11E+08 | 0.08 | -4.92 | 4.05 | 0.06 |
| E1 | GY   | 3A | AX.89740070 | 7.12E+08 | 0.20 | 2.83  | 3.12 | 0.05 |
| E1 | GY   | 3A | AX.89617804 | 6.93E+07 | 0.33 | -2.43 | 3.14 | 0.05 |
| E1 | GY   | 3A | AX.89607034 | 5.64E+07 | 0.37 | -2.50 | 3.45 | 0.06 |
| E1 | GY   | 3A | AX.89313868 | 5.67E+07 | 0.39 | -2.51 | 3.51 | 0.06 |
| E1 | GY   | 3A | AX.89407423 | 5.38E+07 | 0.07 | -4.65 | 3.14 | 0.06 |
| E1 | GY   | 3A | AX.89336419 | 7.12E+08 | 0.20 | 2.83  | 3.12 | 0.05 |
| E1 | GY   | 3A | AX.89539719 | 5.67E+07 | 0.37 | -2.50 | 3.45 | 0.06 |
| E1 | GY   | 3A | AX.89509264 | 5.16E+08 | 0.05 | -5.81 | 3.79 | 0.07 |
| E1 | SPM2 | 3A | AX.89775349 | 2.35E+07 | 0.09 | 31.32 | 3.68 | 0.07 |
| E1 | GY   | 3A | AX.89336503 | 2.11E+05 | 0.35 | 2.40  | 3.14 | 0.06 |
| E1 | GY   | 3A | AX.89675847 | 6.59E+08 | 0.28 | 2.73  | 3.52 | 0.06 |
| E1 | GY   | 3A | AX.89543452 | 1.14E+07 | 0.30 | 2.96  | 4.23 | 0.08 |
| E1 | GY   | 3A | AX.89700698 | 2.08E+05 | 0.35 | 2.40  | 3.14 | 0.06 |
| E1 | GY   | 3A | AX.89477720 | 5.71E+07 | 0.38 | -2.49 | 3.45 | 0.06 |
| E1 | GY   | 3A | AX.89443263 | 7.12E+08 | 0.20 | 2.83  | 3.12 | 0.05 |
| E1 | GY   | 3A | AX.89443263 | 7.12E+08 | 0.20 | 2.83  | 3.12 | 0.05 |
| E1 | GY   | 3A | AX.89701109 | 6.59E+08 | 0.29 | 2.60  | 3.30 | 0.06 |
| E1 | GY   | 3A | AX.89348668 | 6.40E+08 | 0.13 | -3.61 | 3.48 | 0.05 |
| E1 | GY   | 3A | AX.89372891 | 6.93E+07 | 0.33 | -2.43 | 3.14 | 0.05 |
| E1 | GY   | 3A | AX.89326987 | 5.64E+07 | 0.38 | -2.49 | 3.45 | 0.06 |
| E1 | GY   | 3A | AX.89360803 | 5.62E+07 | 0.38 | -2.49 | 3.45 | 0.06 |
| E1 | GY   | 3A | AX.89401377 | 5.67E+07 | 0.37 | -2.50 | 3.45 | 0.06 |
| E1 | GY   | 3A | AX.89604070 | 5.70E+07 | 0.38 | -2.49 | 3.45 | 0.06 |
| E1 | GY   | 3A | AX.89432808 | 5.58E+07 | 0.37 | -2.50 | 3.45 | 0.06 |
| E1 | GY   | 3A | AX.89526633 | 5.17E+08 | 0.05 | -6.25 | 3.98 | 0.08 |
| E1 | GY   | 3A | AX.89579168 | 8.74E+06 | 0.39 | 2.50  | 3.47 | 0.06 |
| E1 | GY   | 3A | AX.89502635 | 5.71E+07 | 0.39 | -2.51 | 3.51 | 0.06 |



|    |      |    |             |          |      |       |      |      |
|----|------|----|-------------|----------|------|-------|------|------|
| E1 | GY   | 3A | AX.89502639 | 5.68E+07 | 0.37 | -2.50 | 3.45 | 0.06 |
| E1 | SPM2 | 3A | AX.89468181 | 2.35E+07 | 0.09 | 31.32 | 3.68 | 0.07 |
| E1 | GY   | 3A | AX.89549204 | 5.64E+07 | 0.38 | -2.49 | 3.45 | 0.06 |
| E1 | GY   | 3A | AX.89374417 | 7.11E+08 | 0.24 | 3.52  | 5.00 | 0.09 |
| E1 | GY   | 3A | AX.89467246 | 5.70E+07 | 0.38 | -2.49 | 3.45 | 0.06 |
| E1 | GY   | 3A | AX.89530750 | 7.11E+08 | 0.06 | -6.47 | 5.27 | 0.09 |
| E1 | GY   | 3A | AX.89362464 | 6.59E+08 | 0.28 | 2.51  | 3.06 | 0.05 |
| E1 | GY   | 3A | AX.89398270 | 5.67E+07 | 0.37 | -2.50 | 3.45 | 0.06 |
| E1 | GY   | 3A | AX.89410438 | 2.25E+05 | 0.50 | -2.33 | 3.24 | 0.04 |
| E1 | GY   | 3A | AX.89538282 | 5.64E+07 | 0.38 | -2.49 | 3.45 | 0.06 |
| E1 | GY   | 3A | AX.89695116 | 5.24E+08 | 0.05 | -6.25 | 3.98 | 0.08 |
| E1 | GY   | 3A | AX.89695116 | 5.24E+08 | 0.05 | -6.25 | 3.98 | 0.08 |
| E1 | GY   | 3A | AX.89371144 | 7.11E+08 | 0.06 | -6.47 | 5.27 | 0.09 |
| E1 | GY   | 3A | AX.89720264 | 7.11E+08 | 0.08 | -4.91 | 4.04 | 0.06 |
| E1 | GY   | 3A | AX.89531199 | 5.57E+07 | 0.37 | -2.50 | 3.45 | 0.06 |
| E1 | GY   | 3A | AX.89363017 | 7.11E+08 | 0.06 | -5.26 | 3.66 | 0.06 |
| E1 | GY   | 3A | AX.89538943 | 7.11E+08 | 0.07 | -5.90 | 5.31 | 0.09 |
| E1 | GY   | 3A | AX.89633282 | 1.31E+06 | 0.36 | -2.35 | 3.04 | 0.04 |
| E1 | GY   | 3A | AX.89463636 | 7.11E+08 | 0.07 | -6.05 | 4.97 | 0.08 |
| E1 | GY   | 3A | AX.89386200 | 2.27E+05 | 0.49 | 2.31  | 3.18 | 0.05 |
| E1 | SPM2 | 3A | AX.89606521 | 2.34E+07 | 0.09 | 31.02 | 3.62 | 0.06 |
| E1 | SPM2 | 3A | AX.89414162 | 2.34E+07 | 0.10 | 30.49 | 3.65 | 0.07 |
| E1 | GY   | 3A | AX.89577654 | 6.59E+08 | 0.29 | 2.60  | 3.30 | 0.06 |
| E1 | GY   | 3A | AX.89411704 | 7.04E+08 | 0.30 | 2.50  | 3.12 | 0.04 |
| E1 | SPM2 | 3A | AX.89344128 | 2.36E+07 | 0.13 | 26.36 | 3.44 | 0.06 |
| E1 | GY   | 3A | AX.89465002 | 2.08E+05 | 0.35 | 2.40  | 3.14 | 0.06 |
| E1 | GY   | 3A | AX.89412589 | 5.62E+07 | 0.38 | -2.49 | 3.45 | 0.06 |
| E1 | GY   | 3A | AX.89412589 | 5.62E+07 | 0.38 | -2.49 | 3.45 | 0.06 |
| E1 | GY   | 3A | AX.89521839 | 7.11E+08 | 0.25 | 2.58  | 3.02 | 0.05 |
| E1 | GY   | 3A | AX.89563886 | 5.17E+08 | 0.05 | -6.25 | 3.98 | 0.08 |
| E1 | GY   | 3A | AX.89587706 | 1.78E+05 | 0.35 | -2.46 | 3.29 | 0.05 |
| E1 | GY   | 3A | AX.89587804 | 7.11E+08 | 0.20 | 2.83  | 3.12 | 0.05 |
| E1 | GY   | 3A | AX.89684384 | 5.70E+07 | 0.38 | -2.49 | 3.45 | 0.06 |
| E1 | GY   | 3A | AX.89635924 | 5.61E+07 | 0.37 | -2.50 | 3.45 | 0.06 |
| E1 | GY   | 3A | AX.89635924 | 5.61E+07 | 0.37 | -2.50 | 3.45 | 0.06 |
| E1 | GY   | 3A | AX.89444324 | 7.12E+08 | 0.21 | 2.98  | 3.45 | 0.06 |
| E1 | SPM2 | 3A | AX.89656077 | 2.35E+07 | 0.09 | 31.32 | 3.68 | 0.07 |
| E1 | GY   | 3A | AX.89402066 | 7.19E+08 | 0.22 | -3.89 | 5.69 | 0.10 |
| E1 | GY   | 3A | AX.89471595 | 7.11E+08 | 0.07 | -6.05 | 4.97 | 0.08 |
| E1 | GY   | 3A | AX.89402335 | 7.11E+08 | 0.24 | 3.52  | 5.00 | 0.09 |
| E1 | GY   | 3A | AX.89735763 | 5.67E+07 | 0.37 | -2.50 | 3.45 | 0.06 |
| E1 | GY   | 3A | AX.89378945 | 5.68E+07 | 0.37 | -2.50 | 3.45 | 0.06 |
| E1 | GY   | 3A | AX.89378945 | 5.68E+07 | 0.37 | -2.50 | 3.45 | 0.06 |
| E1 | SPM2 | 3A | AX.89442115 | 2.36E+07 | 0.12 | 28.09 | 3.73 | 0.07 |
| E1 | GY   | 3A | AX.89379315 | 2.06E+05 | 0.35 | 2.40  | 3.14 | 0.06 |
| E1 | GY   | 3A | AX.89446558 | 7.11E+08 | 0.07 | -6.05 | 4.97 | 0.08 |
| E1 | GY   | 3A | AX.89675847 | 6.59E+08 | 0.28 | 2.73  | 3.52 | 0.06 |
| E1 | GY   | 3A | AX.89517819 | 6.93E+07 | 0.33 | -2.43 | 3.14 | 0.05 |
| E1 | GY   | 3A | AX.89322989 | 5.44E+08 | 0.05 | -5.81 | 3.79 | 0.07 |
| E1 | GY   | 3A | AX.89567118 | 5.67E+07 | 0.37 | -2.50 | 3.45 | 0.06 |

|    |      |    |             |          |      |        |      |      |
|----|------|----|-------------|----------|------|--------|------|------|
| E1 | SPM2 | 3A | AX.89468470 | 2.34E+07 | 0.09 | 31.32  | 3.68 | 0.07 |
| E1 | GY   | 3A | AX.89427948 | 5.67E+07 | 0.37 | -2.50  | 3.45 | 0.06 |
| E1 | GY   | 3A | AX.89701109 | 6.59E+08 | 0.29 | 2.60   | 3.30 | 0.06 |
| E1 | GY   | 3A | AX.89775222 | 5.61E+07 | 0.37 | -2.50  | 3.45 | 0.06 |
| E1 | GY   | 3A | AX.89416353 | 7.11E+08 | 0.24 | 3.52   | 5.00 | 0.09 |
| E1 | GY   | 3A | AX.89762555 | 7.19E+08 | 0.46 | -2.29  | 3.12 | 0.04 |
| E1 | GY   | 3A | AX.89345333 | 5.62E+07 | 0.37 | -2.50  | 3.45 | 0.06 |
| E1 | GY   | 3A | AX.89775578 | 5.61E+07 | 0.38 | -2.49  | 3.45 | 0.06 |
| E1 | GY   | 3A | AX.89369804 | 5.57E+07 | 0.37 | -2.50  | 3.45 | 0.06 |
| E1 | SPM2 | 3A | AX.89499565 | 7.10E+08 | 0.23 | -19.30 | 3.06 | 0.05 |
| E1 | GY   | 3A | AX.89334290 | 1.15E+07 | 0.23 | 3.00   | 3.73 | 0.07 |
| E1 | GY   | 3A | AX.89616535 | 7.11E+08 | 0.06 | -6.47  | 5.27 | 0.09 |
| E1 | GY   | 3A | AX.89513989 | 7.12E+08 | 0.21 | 2.91   | 3.32 | 0.06 |
| E1 | GY   | 3A | AX.89727293 | 6.93E+07 | 0.33 | -2.43  | 3.14 | 0.05 |
| E1 | GY   | 3A | AX.89312843 | 5.67E+07 | 0.38 | -2.49  | 3.45 | 0.06 |
| E1 | GY   | 3A | AX.89534837 | 5.70E+07 | 0.38 | -2.49  | 3.45 | 0.06 |
| E1 | GY   | 3A | AX.89727701 | 6.25E+08 | 0.42 | 2.32   | 3.15 | 0.06 |
| E1 | GY   | 3A | AX.89313868 | 5.67E+07 | 0.39 | -2.51  | 3.51 | 0.06 |
| E1 | GY   | 3A | AX.89603026 | 5.57E+08 | 0.05 | -5.95  | 3.66 | 0.07 |
| E1 | GY   | 3A | AX.89546950 | 5.68E+07 | 0.37 | -2.50  | 3.45 | 0.06 |
| E1 | GY   | 3A | AX.89372086 | 5.57E+07 | 0.37 | -2.50  | 3.45 | 0.06 |
| E1 | SPM2 | 3A | AX.89347138 | 2.36E+07 | 0.12 | 29.78  | 4.01 | 0.07 |
| E1 | GY   | 3A | AX.89356377 | 5.62E+07 | 0.37 | -2.50  | 3.45 | 0.06 |
| E1 | GY   | 3A | AX.89477720 | 5.71E+07 | 0.38 | -2.49  | 3.45 | 0.06 |
| E1 | SPM2 | 3A | AX.89745749 | 2.36E+07 | 0.12 | 28.09  | 3.73 | 0.07 |
| E1 | GY   | 3A | AX.89595635 | 5.62E+07 | 0.37 | -2.50  | 3.45 | 0.06 |
| E1 | GY   | 3A | AX.89753188 | 5.61E+07 | 0.37 | -2.50  | 3.45 | 0.06 |
| E1 | GY   | 3A | AX.89514349 | 5.70E+07 | 0.38 | -2.49  | 3.45 | 0.06 |
| E1 | GY   | 3A | AX.89631332 | 6.60E+08 | 0.24 | 2.83   | 3.41 | 0.06 |
| E1 | GY   | 3A | AX.89742109 | 5.67E+07 | 0.37 | -2.50  | 3.45 | 0.06 |
| E1 | GY   | 3A | AX.89502639 | 5.68E+07 | 0.37 | -2.50  | 3.45 | 0.06 |
| E1 | GY   | 3A | AX.89644393 | 6.95E+07 | 0.33 | -2.43  | 3.14 | 0.05 |
| E1 | GY   | 3A | AX.89669221 | 7.11E+08 | 0.20 | 2.83   | 3.12 | 0.05 |
| E1 | GY   | 3A | AX.89549204 | 5.64E+07 | 0.38 | -2.49  | 3.45 | 0.06 |
| E1 | GY   | 3A | AX.89409977 | 9.90E+04 | 0.40 | -2.96  | 4.73 | 0.07 |
| E1 | GY   | 3A | AX.89316834 | 5.67E+07 | 0.37 | -2.50  | 3.45 | 0.06 |
| E1 | GY   | 3A | AX.89374417 | 7.11E+08 | 0.24 | 3.52   | 5.00 | 0.09 |
| E1 | GY   | 3A | AX.89421469 | 5.64E+07 | 0.38 | -2.49  | 3.45 | 0.06 |
| E1 | SPM2 | 3A | AX.89506554 | 2.36E+07 | 0.12 | 28.09  | 3.73 | 0.07 |
| E1 | GY   | 3A | AX.89467391 | 7.19E+08 | 0.46 | -2.29  | 3.12 | 0.04 |
| E1 | GY   | 3A | AX.89573099 | 5.67E+07 | 0.37 | -2.50  | 3.45 | 0.06 |
| E1 | GY   | 3A | AX.89749604 | 5.64E+07 | 0.37 | -2.50  | 3.45 | 0.06 |
| E1 | GY   | 3A | AX.89537064 | 6.93E+07 | 0.33 | -2.43  | 3.14 | 0.05 |
| E1 | GY   | 3A | AX.89768286 | 7.11E+08 | 0.06 | -6.47  | 5.27 | 0.09 |
| E1 | GY   | 3A | AX.89538943 | 7.11E+08 | 0.07 | -5.90  | 5.31 | 0.09 |
| E1 | GY   | 3A | AX.89744040 | 5.16E+08 | 0.05 | -5.81  | 3.79 | 0.07 |
| E1 | GY   | 3A | AX.89375233 | 2.28E+05 | 0.35 | 2.40   | 3.14 | 0.06 |
| E1 | GY   | 3A | AX.89386200 | 2.27E+05 | 0.49 | 2.31   | 3.18 | 0.05 |
| E1 | GY   | 3A | AX.89550109 | 5.70E+07 | 0.38 | -2.49  | 3.45 | 0.06 |
| E1 | GY   | 3A | AX.86161945 | 7.19E+08 | 0.46 | -2.29  | 3.12 | 0.04 |

|    |      |    |             |          |      |       |      |      |
|----|------|----|-------------|----------|------|-------|------|------|
| E1 | GY   | 3A | AX.89411438 | 5.70E+07 | 0.37 | -2.50 | 3.45 | 0.06 |
| E1 | GY   | 3A | AX.89411438 | 5.70E+07 | 0.37 | -2.50 | 3.45 | 0.06 |
| E1 | GY   | 3A | AX.89645968 | 5.71E+07 | 0.38 | -2.49 | 3.45 | 0.06 |
| E1 | GY   | 3A | AX.89528809 | 7.11E+08 | 0.08 | -4.91 | 4.04 | 0.06 |
| E1 | GY   | 3A | AX.89634345 | 7.11E+08 | 0.06 | -5.83 | 4.10 | 0.07 |
| E1 | GY   | 3A | AX.89496066 | 6.93E+07 | 0.33 | -2.43 | 3.14 | 0.05 |
| E1 | GY   | 3A | AX.89340321 | 1.15E+07 | 0.32 | 2.41  | 3.04 | 0.05 |
| E1 | GY   | 3A | AX.89340321 | 1.15E+07 | 0.32 | 2.41  | 3.04 | 0.05 |
| E1 | GY   | 3A | AX.89468914 | 5.68E+07 | 0.37 | -2.50 | 3.45 | 0.06 |
| E1 | GY   | 3A | AX.89646447 | 7.11E+08 | 0.06 | -6.47 | 5.27 | 0.09 |
| E1 | GY   | 3A | AX.89726966 | 5.67E+07 | 0.37 | -2.50 | 3.45 | 0.06 |
| E1 | GY   | 3A | AX.89726966 | 5.67E+07 | 0.37 | -2.50 | 3.45 | 0.06 |
| E1 | GY   | 3A | AX.89318922 | 5.67E+07 | 0.37 | -2.50 | 3.45 | 0.06 |
| E1 | GY   | 3A | AX.89637550 | 1.60E+05 | 0.50 | -2.30 | 3.17 | 0.04 |
| E1 | GY   | 3A | AX.89672273 | 5.61E+07 | 0.37 | -2.50 | 3.45 | 0.06 |
| E1 | GY   | 3A | AX.89505805 | 6.60E+08 | 0.24 | 2.83  | 3.41 | 0.06 |
| E1 | GY   | 3A | AX.89529884 | 5.62E+07 | 0.37 | -2.50 | 3.45 | 0.06 |
| E1 | GY   | 3A | AX.89554883 | 5.67E+07 | 0.38 | -2.52 | 3.50 | 0.06 |
| E1 | GY   | 3A | AX.89484211 | 5.70E+07 | 0.38 | -2.49 | 3.45 | 0.06 |
| E1 | GY   | 3A | AX.89484211 | 5.70E+07 | 0.38 | -2.49 | 3.45 | 0.06 |
| E1 | GY   | 3A | AX.89484890 | 1.16E+07 | 0.32 | 2.41  | 3.04 | 0.05 |
| E1 | GY   | 3A | AX.89402335 | 7.11E+08 | 0.24 | 3.52  | 5.00 | 0.09 |
| E1 | GY   | 3A | AX.89585123 | 5.16E+08 | 0.05 | -5.81 | 3.79 | 0.07 |
| E1 | GY   | 3A | AX.89320950 | 6.59E+08 | 0.21 | 3.18  | 3.86 | 0.07 |
| E1 | GY   | 3A | AX.89402456 | 7.11E+08 | 0.24 | 3.52  | 5.00 | 0.09 |
| E1 | GY   | 3A | AX.89699257 | 5.67E+07 | 0.37 | -2.47 | 3.34 | 0.05 |
| E1 | GY   | 3A | AX.89777576 | 6.25E+08 | 0.24 | 2.67  | 3.10 | 0.04 |
| E1 | GY   | 3A | AX.89637185 | 5.62E+07 | 0.36 | -2.50 | 3.41 | 0.06 |
| E1 | GY   | 3A | AX.89637185 | 5.62E+07 | 0.36 | -2.50 | 3.41 | 0.06 |
| E1 | GY   | 3A | AX.89355033 | 7.11E+08 | 0.08 | -4.92 | 4.05 | 0.06 |
| E1 | GY   | 3A | AX.89654923 | 6.93E+07 | 0.33 | -2.43 | 3.14 | 0.05 |
| E1 | GY   | 3A | AX.89748055 | 5.64E+07 | 0.37 | -2.50 | 3.45 | 0.06 |
| E1 | GY   | 3A | AX.89748055 | 5.64E+07 | 0.37 | -2.50 | 3.45 | 0.06 |
| E1 | GY   | 3A | AX.89654132 | 6.60E+08 | 0.24 | 2.83  | 3.41 | 0.06 |
| E1 | GY   | 3A | AX.89570766 | 5.67E+07 | 0.37 | -2.50 | 3.45 | 0.06 |
| E1 | GY   | 3A | AX.89570766 | 5.67E+07 | 0.37 | -2.50 | 3.45 | 0.06 |
| E1 | GY   | 3A | AX.89427924 | 5.61E+07 | 0.37 | -2.50 | 3.45 | 0.06 |
| E1 | GY   | 3A | AX.89684173 | 7.12E+08 | 0.20 | 2.83  | 3.12 | 0.05 |
| E1 | GY   | 3A | AX.89591634 | 2.13E+05 | 0.35 | 2.40  | 3.14 | 0.06 |
| E1 | GY   | 3A | AX.89733840 | 2.07E+05 | 0.35 | 2.40  | 3.14 | 0.06 |
| E1 | GY   | 3A | AX.89461923 | 5.61E+07 | 0.38 | -2.52 | 3.50 | 0.06 |
| E1 | GY   | 3A | AX.89416520 | 5.70E+07 | 0.38 | -2.49 | 3.45 | 0.06 |
| E1 | GY   | 3A | AX.89416520 | 5.70E+07 | 0.38 | -2.49 | 3.45 | 0.06 |
| E1 | GY   | 3A | AX.89357150 | 7.09E+08 | 0.07 | -4.53 | 3.01 | 0.05 |
| E1 | SPM2 | 3A | AX.89419170 | 2.34E+07 | 0.10 | 30.49 | 3.65 | 0.07 |
| E1 | SPM2 | 3A | AX.89311041 | 2.34E+07 | 0.10 | 30.49 | 3.65 | 0.07 |
| E1 | GY   | 3A | AX.89763365 | 6.59E+08 | 0.29 | 2.60  | 3.30 | 0.06 |
| E1 | GY   | 3A | AX.89405834 | 6.34E+08 | 0.47 | -2.47 | 3.56 | 0.06 |
| E1 | GY   | 3A | AX.89690421 | 7.14E+08 | 0.38 | 2.30  | 3.00 | 0.05 |
| E1 | GY   | 3A | AX.89325079 | 7.11E+08 | 0.07 | -5.78 | 4.86 | 0.08 |

|    |      |    |             |          |      |        |      |      |
|----|------|----|-------------|----------|------|--------|------|------|
| E1 | GY   | 3A | AX.89716020 | 6.12E+08 | 0.23 | -2.88  | 3.47 | 0.06 |
| E1 | GY   | 3A | AX.89358928 | 5.71E+07 | 0.38 | -2.49  | 3.45 | 0.06 |
| E1 | GY   | 3A | AX.89417960 | 5.69E+07 | 0.37 | -2.50  | 3.45 | 0.06 |
| E1 | GY   | 3A | AX.89417960 | 5.69E+07 | 0.37 | -2.50  | 3.45 | 0.06 |
| E1 | GY   | 3A | AX.89740047 | 6.59E+08 | 0.28 | 2.51   | 3.06 | 0.05 |
| E1 | GY   | 3A | AX.89464016 | 5.64E+07 | 0.37 | -2.50  | 3.45 | 0.06 |
| E1 | GY   | 3A | AX.89395219 | 5.67E+07 | 0.38 | -2.40  | 3.22 | 0.05 |
| E1 | GY   | 3A | AX.89603026 | 5.57E+08 | 0.05 | -5.95  | 3.66 | 0.07 |
| E1 | GY   | 3A | AX.89336503 | 2.11E+05 | 0.35 | 2.40   | 3.14 | 0.06 |
| E1 | GY   | 3A | AX.89431563 | 7.12E+08 | 0.20 | 2.83   | 3.12 | 0.05 |
| E1 | GY   | 3A | AX.89766111 | 5.68E+07 | 0.38 | -2.49  | 3.45 | 0.06 |
| E1 | GY   | 3A | AX.89630559 | 2.13E+05 | 0.35 | 2.38   | 3.10 | 0.05 |
| E1 | GY   | 3A | AX.89595635 | 5.62E+07 | 0.37 | -2.50  | 3.45 | 0.06 |
| E1 | GY   | 3A | AX.89326987 | 5.64E+07 | 0.38 | -2.49  | 3.45 | 0.06 |
| E1 | GY   | 3A | AX.89360803 | 5.62E+07 | 0.38 | -2.49  | 3.45 | 0.06 |
| E1 | GY   | 3A | AX.89541040 | 5.16E+08 | 0.05 | -5.81  | 3.79 | 0.07 |
| E1 | GY   | 3A | AX.89541040 | 5.16E+08 | 0.05 | -5.81  | 3.79 | 0.07 |
| E1 | GY   | 3A | AX.89579168 | 8.74E+06 | 0.39 | 2.50   | 3.47 | 0.06 |
| E1 | GY   | 3A | AX.89619765 | 6.59E+08 | 0.21 | 3.18   | 3.86 | 0.07 |
| E1 | GY   | 3A | AX.89619765 | 6.59E+08 | 0.21 | 3.18   | 3.86 | 0.07 |
| E1 | GY   | 3A | AX.89644393 | 6.95E+07 | 0.33 | -2.43  | 3.14 | 0.05 |
| E1 | GY   | 3A | AX.89706416 | 6.95E+07 | 0.33 | -2.43  | 3.14 | 0.05 |
| E1 | GY   | 3A | AX.89706416 | 6.95E+07 | 0.33 | -2.43  | 3.14 | 0.05 |
| E1 | GY   | 3A | AX.89421469 | 5.64E+07 | 0.38 | -2.49  | 3.45 | 0.06 |
| E1 | GY   | 3A | AX.89467246 | 5.70E+07 | 0.38 | -2.49  | 3.45 | 0.06 |
| E1 | GY   | 3A | AX.89755194 | 7.12E+08 | 0.20 | 2.83   | 3.12 | 0.05 |
| E1 | GY   | 3A | AX.89633282 | 1.31E+06 | 0.36 | -2.35  | 3.04 | 0.04 |
| E1 | GY   | 3A | AX.89375233 | 2.28E+05 | 0.35 | 2.40   | 3.14 | 0.06 |
| E1 | GY   | 3A | AX.89617932 | 5.16E+08 | 0.05 | -5.81  | 3.79 | 0.07 |
| E1 | GY   | 3A | AX.89528765 | 5.67E+07 | 0.37 | -2.50  | 3.45 | 0.06 |
| E1 | GY   | 3A | AX.89528765 | 5.67E+07 | 0.37 | -2.50  | 3.45 | 0.06 |
| E1 | GY   | 3A | AX.89399628 | 2.16E+05 | 0.35 | 2.40   | 3.14 | 0.06 |
| E1 | GY   | 3A | AX.89399628 | 2.16E+05 | 0.35 | 2.40   | 3.14 | 0.06 |
| E1 | GY   | 3A | AX.89732524 | 5.67E+07 | 0.38 | -2.52  | 3.50 | 0.06 |
| E1 | GY   | 3A | AX.89411704 | 7.04E+08 | 0.30 | 2.50   | 3.12 | 0.04 |
| E1 | GY   | 3A | AX.89412117 | 5.16E+08 | 0.05 | -5.81  | 3.79 | 0.07 |
| E1 | SPM2 | 3A | AX.89579477 | 9.57E+06 | 0.26 | -19.18 | 3.20 | 0.05 |
| E1 | GY   | 3A | AX.89647537 | 7.11E+08 | 0.07 | -5.96  | 4.84 | 0.08 |
| E1 | GY   | 3A | AX.89660075 | 9.67E+04 | 0.35 | 2.40   | 3.14 | 0.06 |
| E1 | GY   | 3A | AX.89401377 | 5.67E+07 | 0.37 | -2.50  | 3.45 | 0.06 |
| E1 | GY   | 3A | AX.89697914 | 5.71E+07 | 0.38 | -2.49  | 3.45 | 0.06 |
| E1 | GY   | 3A | AX.89470027 | 5.61E+07 | 0.37 | -2.50  | 3.45 | 0.06 |
| E1 | GY   | 3A | AX.89470027 | 5.61E+07 | 0.37 | -2.50  | 3.45 | 0.06 |
| E1 | GY   | 3A | AX.89635943 | 1.44E+08 | 0.09 | -4.47  | 3.89 | 0.06 |
| E1 | GY   | 3A | AX.89635943 | 1.44E+08 | 0.09 | -4.47  | 3.89 | 0.06 |
| E1 | GY   | 3A | AX.89579477 | 9.57E+06 | 0.26 | -2.62  | 3.13 | 0.04 |
| E1 | GY   | 3A | AX.89698074 | 6.93E+07 | 0.33 | -2.43  | 3.14 | 0.05 |
| E1 | GY   | 3A | AX.89471595 | 7.11E+08 | 0.07 | -6.05  | 4.97 | 0.08 |
| E1 | GY   | 3A | AX.89731479 | 7.11E+08 | 0.06 | -6.47  | 5.27 | 0.09 |
| E1 | SPM2 | 3A | AX.89587477 | 2.35E+07 | 0.09 | 33.71  | 4.02 | 0.07 |

|    |      |    |             |          |      |        |      |      |
|----|------|----|-------------|----------|------|--------|------|------|
| E1 | GY   | 3A | AX.89637093 | 5.70E+07 | 0.38 | -2.49  | 3.45 | 0.06 |
| E1 | GY   | 3A | AX.89637093 | 5.70E+07 | 0.38 | -2.49  | 3.45 | 0.06 |
| E1 | GY   | 3A | AX.89549948 | 5.70E+07 | 0.38 | -2.49  | 3.45 | 0.06 |
| E1 | GY   | 3A | AX.89736209 | 5.61E+07 | 0.37 | -2.50  | 3.45 | 0.06 |
| E1 | GY   | 3A | AX.89613894 | 7.11E+08 | 0.07 | -6.16  | 5.13 | 0.08 |
| E1 | GY   | 3A | AX.89508580 | 5.61E+07 | 0.37 | -2.50  | 3.45 | 0.06 |
| E1 | SPM2 | 3A | AX.89643343 | 7.10E+08 | 0.23 | -19.30 | 3.06 | 0.05 |
| E1 | GY   | 3A | AX.89725109 | 7.11E+08 | 0.06 | -6.47  | 5.27 | 0.09 |
| E1 | GY   | 3A | AX.89543452 | 1.14E+07 | 0.30 | 2.96   | 4.23 | 0.08 |
| E1 | GY   | 3A | AX.89683629 | 6.59E+08 | 0.28 | 2.73   | 3.52 | 0.06 |
| E1 | GY   | 3A | AX.89700698 | 2.08E+05 | 0.35 | 2.40   | 3.14 | 0.06 |
| E1 | GY   | 3A | AX.89356377 | 5.62E+07 | 0.37 | -2.50  | 3.45 | 0.06 |
| E1 | GY   | 3A | AX.89591634 | 2.13E+05 | 0.35 | 2.40   | 3.14 | 0.06 |
| E1 | GY   | 3A | AX.89427948 | 5.67E+07 | 0.37 | -2.50  | 3.45 | 0.06 |
| E1 | GY   | 3A | AX.89775222 | 5.61E+07 | 0.37 | -2.50  | 3.45 | 0.06 |
| E1 | GY   | 3A | AX.89591989 | 7.12E+08 | 0.20 | 2.83   | 3.12 | 0.05 |
| E1 | GY   | 3A | AX.89417627 | 7.12E+08 | 0.20 | 2.83   | 3.12 | 0.05 |
| E1 | GY   | 3A | AX.89676793 | 5.70E+07 | 0.38 | -2.49  | 3.45 | 0.06 |
| E1 | GY   | 3A | AX.89334033 | 5.71E+07 | 0.38 | -2.49  | 3.45 | 0.06 |
| E1 | GY   | 3A | AX.89616067 | 5.68E+07 | 0.37 | -2.50  | 3.45 | 0.06 |
| E1 | GY   | 3A | AX.89369804 | 5.57E+07 | 0.37 | -2.50  | 3.45 | 0.06 |
| E1 | GY   | 3A | AX.89552884 | 7.11E+08 | 0.11 | -5.49  | 6.26 | 0.10 |
| E1 | GY   | 3A | AX.89371144 | 7.11E+08 | 0.06 | -6.47  | 5.27 | 0.09 |
| E1 | GY   | 3A | AX.89678328 | 5.62E+07 | 0.38 | -2.49  | 3.45 | 0.06 |
| E1 | GY   | 3A | AX.89678328 | 5.62E+07 | 0.38 | -2.49  | 3.45 | 0.06 |
| E1 | GY   | 3A | AX.89512498 | 5.68E+07 | 0.37 | -2.50  | 3.45 | 0.06 |
| E1 | SPM2 | 3A | AX.89333265 | 2.36E+07 | 0.12 | 28.09  | 3.73 | 0.07 |
| E1 | GY   | 3A | AX.89727701 | 6.25E+08 | 0.42 | 2.32   | 3.15 | 0.06 |
| E1 | GY   | 3A | AX.89577247 | 5.67E+07 | 0.37 | -2.50  | 3.45 | 0.06 |
| E1 | GY   | 3A | AX.89463636 | 7.11E+08 | 0.07 | -6.05  | 4.97 | 0.08 |
| E1 | GY   | 3A | AX.89335688 | 7.11E+08 | 0.07 | -5.26  | 4.12 | 0.07 |
| E1 | GY   | 3A | AX.89476226 | 5.70E+07 | 0.38 | -2.49  | 3.45 | 0.06 |
| E1 | GY   | 3A | AX.89371520 | 5.70E+07 | 0.38 | -2.49  | 3.45 | 0.06 |
| E1 | GY   | 3A | AX.89485992 | 5.64E+07 | 0.37 | -2.50  | 3.45 | 0.06 |
| E1 | GY   | 3A | AX.89407423 | 5.38E+07 | 0.07 | -4.65  | 3.14 | 0.06 |
| E1 | GY   | 3A | AX.89629820 | 5.28E+08 | 0.05 | -6.25  | 3.98 | 0.08 |
| E1 | GY   | 3A | AX.89326089 | 5.67E+07 | 0.37 | -2.50  | 3.45 | 0.06 |
| E1 | GY   | 3A | AX.89464016 | 5.64E+07 | 0.37 | -2.50  | 3.45 | 0.06 |
| E1 | GY   | 3A | AX.89705622 | 5.64E+07 | 0.37 | -2.50  | 3.45 | 0.06 |
| E1 | GY   | 3A | AX.89464249 | 4.29E+05 | 0.35 | -2.38  | 3.10 | 0.04 |
| E1 | GY   | 3A | AX.89539719 | 5.67E+07 | 0.37 | -2.50  | 3.45 | 0.06 |
| E1 | GY   | 3A | AX.89314273 | 5.17E+08 | 0.05 | -5.27  | 3.21 | 0.06 |
| E1 | GY   | 3A | AX.89372086 | 5.57E+07 | 0.37 | -2.50  | 3.45 | 0.06 |
| E1 | GY   | 3A | AX.89626555 | 6.59E+08 | 0.28 | 2.73   | 3.52 | 0.06 |
| E1 | GY   | 3A | AX.89559867 | 5.67E+07 | 0.38 | -2.49  | 3.45 | 0.06 |
| E1 | GY   | 3A | AX.89559867 | 5.67E+07 | 0.38 | -2.49  | 3.45 | 0.06 |
| E1 | GY   | 3A | AX.89526633 | 5.17E+08 | 0.05 | -6.25  | 3.98 | 0.08 |
| E1 | SPM2 | 3A | AX.89379585 | 2.34E+07 | 0.10 | 30.49  | 3.65 | 0.07 |
| E1 | GY   | 3A | AX.89397074 | 5.61E+07 | 0.38 | -2.49  | 3.45 | 0.06 |
| E1 | GY   | 3A | AX.89397074 | 5.61E+07 | 0.38 | -2.49  | 3.45 | 0.06 |

|    |     |    |             |          |      |       |      |      |
|----|-----|----|-------------|----------|------|-------|------|------|
| E1 | GY  | 3A | AX.89502635 | 5.71E+07 | 0.39 | -2.51 | 3.51 | 0.06 |
| E1 | GY  | 3A | AX.89444324 | 7.12E+08 | 0.21 | 2.98  | 3.45 | 0.06 |
| E1 | GY  | 3A | AX.89445155 | 5.67E+07 | 0.37 | -2.50 | 3.45 | 0.06 |
| E1 | GY  | 3A | AX.89362464 | 6.59E+08 | 0.28 | 2.51  | 3.06 | 0.05 |
| E1 | GY  | 3A | AX.89467391 | 7.19E+08 | 0.46 | -2.29 | 3.12 | 0.04 |
| E1 | GY  | 3A | AX.89745936 | 7.11E+08 | 0.20 | 2.83  | 3.12 | 0.05 |
| E1 | GY  | 3A | AX.89720264 | 7.11E+08 | 0.08 | -4.91 | 4.04 | 0.06 |
| E1 | GY  | 3A | AX.89537064 | 6.93E+07 | 0.33 | -2.43 | 3.14 | 0.05 |
| E1 | GY  | 3A | AX.89768286 | 7.11E+08 | 0.06 | -6.47 | 5.27 | 0.09 |
| E1 | GY  | 3A | AX.89363017 | 7.11E+08 | 0.06 | -5.26 | 3.66 | 0.06 |
| E1 | GY  | 3A | AX.89573360 | 7.11E+08 | 0.20 | 2.83  | 3.12 | 0.05 |
| E1 | GY  | 3A | AX.89573360 | 7.11E+08 | 0.20 | 2.83  | 3.12 | 0.05 |
| E1 | GY  | 3A | AX.89445873 | 5.57E+08 | 0.05 | -5.95 | 3.66 | 0.07 |
| E1 | GY  | 3A | AX.89445873 | 5.57E+08 | 0.05 | -5.95 | 3.66 | 0.07 |
| E1 | GY  | 3A | AX.86161945 | 7.19E+08 | 0.46 | -2.29 | 3.12 | 0.04 |
| E1 | GY  | 3A | AX.89649354 | 7.11E+08 | 0.06 | -6.47 | 5.27 | 0.09 |
| E1 | GY  | 3A | AX.89649354 | 7.11E+08 | 0.06 | -6.47 | 5.27 | 0.09 |
| E1 | GY  | 3A | AX.89504535 | 6.25E+08 | 0.48 | -2.42 | 3.44 | 0.05 |
| E1 | GY  | 3A | AX.89602017 | 5.61E+07 | 0.38 | -2.49 | 3.45 | 0.06 |
| E1 | GY  | 3A | AX.89517819 | 6.93E+07 | 0.33 | -2.43 | 3.14 | 0.05 |
| E1 | GY  | 3A | AX.89672273 | 5.61E+07 | 0.37 | -2.50 | 3.45 | 0.06 |
| E1 | GY  | 3A | AX.89697914 | 5.71E+07 | 0.38 | -2.49 | 3.45 | 0.06 |
| E1 | GY  | 3A | AX.89734012 | 5.64E+08 | 0.06 | -5.29 | 3.46 | 0.07 |
| E1 | GY  | 3A | AX.89554883 | 5.67E+07 | 0.38 | -2.52 | 3.50 | 0.06 |
| E1 | GY  | 3A | AX.89579477 | 9.57E+06 | 0.26 | -2.62 | 3.13 | 0.04 |
| E1 | GY  | 3A | AX.89530250 | 5.67E+07 | 0.37 | -2.50 | 3.45 | 0.06 |
| E1 | GY  | 3A | AX.89742601 | 6.59E+08 | 0.21 | 3.27  | 4.13 | 0.07 |
| E1 | GY  | 3A | AX.89556622 | 6.59E+08 | 0.28 | 2.52  | 3.10 | 0.05 |
| E1 | GY  | 3A | AX.89723196 | 1.14E+07 | 0.32 | 2.43  | 3.06 | 0.05 |
| E1 | GY  | 3A | AX.89418431 | 5.65E+08 | 0.06 | -5.29 | 3.46 | 0.07 |
| E1 | GY  | 3A | AX.89484890 | 1.16E+07 | 0.32 | 2.41  | 3.04 | 0.05 |
| E1 | GY  | 3A | AX.89541934 | 1.14E+07 | 0.44 | 2.25  | 3.00 | 0.05 |
| E1 | GY  | 3A | AX.89699862 | 1.18E+07 | 0.43 | 2.57  | 3.77 | 0.07 |
| E1 | GY  | 3A | AX.89699862 | 1.18E+07 | 0.43 | 2.57  | 3.77 | 0.07 |
| E1 | GY  | 3A | AX.89379315 | 2.06E+05 | 0.35 | 2.40  | 3.14 | 0.06 |
| E1 | GY  | 3A | AX.89543199 | 5.06E+08 | 0.06 | -4.93 | 3.08 | 0.06 |
| E1 | GY  | 3A | AX.89566650 | 7.11E+08 | 0.26 | 2.68  | 3.25 | 0.06 |
| E1 | GY  | 3A | AX.89566650 | 7.11E+08 | 0.26 | 2.68  | 3.25 | 0.06 |
| E1 | GY  | 3A | AX.89509264 | 5.16E+08 | 0.05 | -5.81 | 3.79 | 0.07 |
| E1 | GY  | 3A | AX.89654132 | 6.60E+08 | 0.24 | 2.83  | 3.41 | 0.06 |
| E1 | GY  | 3A | AX.89450721 | 6.34E+08 | 0.41 | 2.41  | 3.34 | 0.06 |
| E1 | GY  | 3A | AX.89486754 | 2.25E+05 | 0.49 | -2.40 | 3.41 | 0.05 |
| E1 | GY  | 3A | AX.89486754 | 2.25E+05 | 0.49 | -2.40 | 3.41 | 0.05 |
| E1 | GY  | 3A | AX.89450928 | 7.95E+06 | 0.40 | -2.36 | 3.18 | 0.04 |
| E1 | GY  | 3A | AX.89450928 | 7.95E+06 | 0.40 | -2.36 | 3.18 | 0.04 |
| E1 | GY  | 3A | AX.89416077 | 5.70E+07 | 0.38 | -2.49 | 3.45 | 0.06 |
| E1 | GY  | 3A | AX.89762555 | 7.19E+08 | 0.46 | -2.29 | 3.12 | 0.04 |
| E1 | GY  | 3A | AX.89369723 | 6.93E+07 | 0.33 | -2.43 | 3.14 | 0.05 |
| E1 | GPS | 3A | AX.89445039 | 7.11E+08 | 0.06 | -2.38 | 3.13 | 0.05 |
| E1 | GY  | 3A | AX.89513989 | 7.12E+08 | 0.21 | 2.91  | 3.32 | 0.06 |

|    |      |    |             |          |      |       |      |      |
|----|------|----|-------------|----------|------|-------|------|------|
| E1 | GY   | 3A | AX.89556938 | 6.59E+08 | 0.29 | 2.60  | 3.30 | 0.06 |
| E1 | GY   | 3A | AX.89475487 | 5.67E+07 | 0.37 | -2.50 | 3.45 | 0.06 |
| E1 | GY   | 3A | AX.89452352 | 1.25E+07 | 0.33 | -2.41 | 3.11 | 0.04 |
| E1 | GY   | 3A | AX.89452352 | 1.25E+07 | 0.33 | -2.41 | 3.11 | 0.04 |
| E1 | GY   | 3A | AX.89313133 | 5.67E+07 | 0.38 | -2.49 | 3.45 | 0.06 |
| E1 | GY   | 3A | AX.89756161 | 5.62E+07 | 0.38 | -2.49 | 3.45 | 0.06 |
| E1 | GY   | 3A | AX.89489326 | 7.11E+08 | 0.07 | -4.69 | 3.19 | 0.05 |
| E1 | GY   | 3A | AX.89680239 | 6.25E+08 | 0.47 | -2.27 | 3.07 | 0.05 |
| E1 | GY   | 3A | AX.89740185 | 5.57E+07 | 0.38 | -2.49 | 3.45 | 0.06 |
| E1 | GY   | 3A | AX.89740185 | 5.57E+07 | 0.38 | -2.49 | 3.45 | 0.06 |
| E1 | GY   | 3A | AX.89629820 | 5.28E+08 | 0.05 | -6.25 | 3.98 | 0.08 |
| E1 | GY   | 3A | AX.89347777 | 5.68E+07 | 0.37 | -2.50 | 3.45 | 0.06 |
| E1 | GY   | 3A | AX.89347777 | 5.68E+07 | 0.37 | -2.50 | 3.45 | 0.06 |
| E1 | GY   | 3A | AX.89464249 | 4.29E+05 | 0.35 | -2.38 | 3.10 | 0.04 |
| E1 | GPS  | 3A | AX.89616535 | 7.11E+08 | 0.06 | -2.38 | 3.13 | 0.05 |
| E1 | GY   | 3A | AX.89314273 | 5.17E+08 | 0.05 | -5.27 | 3.21 | 0.06 |
| E1 | SPM2 | 3A | AX.89369015 | 2.35E+07 | 0.09 | 31.32 | 3.68 | 0.07 |
| E1 | GPS  | 3A | AX.89463636 | 7.11E+08 | 0.07 | -2.32 | 3.18 | 0.05 |
| E1 | GY   | 3A | AX.89536450 | 5.68E+07 | 0.38 | -2.49 | 3.45 | 0.06 |
| E1 | GY   | 3A | AX.89372891 | 6.93E+07 | 0.33 | -2.43 | 3.14 | 0.05 |
| E1 | GY   | 3A | AX.89762173 | 5.71E+07 | 0.38 | -2.49 | 3.45 | 0.06 |
| E1 | GY   | 3A | AX.89755885 | 5.64E+07 | 0.38 | -2.49 | 3.45 | 0.06 |
| E1 | GY   | 3A | AX.89742109 | 5.67E+07 | 0.37 | -2.50 | 3.45 | 0.06 |
| E1 | GY   | 3A | AX.89765606 | 7.11E+08 | 0.24 | 3.52  | 5.00 | 0.09 |
| E1 | GY   | 3A | AX.89409977 | 9.90E+04 | 0.40 | -2.96 | 4.73 | 0.07 |
| E1 | GY   | 3A | AX.89706491 | 6.59E+08 | 0.28 | 2.73  | 3.52 | 0.06 |
| E1 | GY   | 3A | AX.89706491 | 6.59E+08 | 0.28 | 2.73  | 3.52 | 0.06 |
| E1 | GY   | 3A | AX.89316834 | 5.67E+07 | 0.37 | -2.50 | 3.45 | 0.06 |
| E1 | GY   | 3A | AX.89445039 | 7.11E+08 | 0.06 | -6.47 | 5.27 | 0.09 |
| E1 | GY   | 3A | AX.89666899 | 6.59E+08 | 0.21 | 3.27  | 4.13 | 0.07 |
| E1 | GY   | 3A | AX.89666899 | 6.59E+08 | 0.21 | 3.27  | 4.13 | 0.07 |
| E1 | GY   | 3A | AX.89749604 | 5.64E+07 | 0.37 | -2.50 | 3.45 | 0.06 |
| E1 | GY   | 3A | AX.89579551 | 7.11E+08 | 0.09 | -4.64 | 4.16 | 0.07 |
| E1 | GY   | 3A | AX.89579551 | 7.11E+08 | 0.09 | -4.64 | 4.16 | 0.07 |
| E1 | GY   | 3A | AX.89528629 | 6.25E+08 | 0.48 | -2.52 | 3.70 | 0.06 |
| E1 | GY   | 3A | AX.89528629 | 6.25E+08 | 0.48 | -2.52 | 3.70 | 0.06 |
| E1 | GY   | 3A | AX.89528809 | 7.11E+08 | 0.08 | -4.91 | 4.04 | 0.06 |
| E1 | GY   | 3A | AX.89496066 | 6.93E+07 | 0.33 | -2.43 | 3.14 | 0.05 |
| E1 | GY   | 3A | AX.89646447 | 7.11E+08 | 0.06 | -6.47 | 5.27 | 0.09 |
| E1 | GY   | 3A | AX.89723050 | 5.61E+07 | 0.38 | -2.49 | 3.45 | 0.06 |
| E1 | GY   | 3A | AX.89701379 | 5.20E+08 | 0.05 | -7.82 | 5.92 | 0.11 |
| E1 | GY   | 3A | AX.89748618 | 5.67E+07 | 0.37 | -2.50 | 3.45 | 0.06 |
| E1 | GY   | 3A | AX.89748618 | 5.67E+07 | 0.37 | -2.50 | 3.45 | 0.06 |
| E1 | GY   | 3A | AX.89423759 | 5.62E+07 | 0.38 | -2.52 | 3.50 | 0.06 |
| E1 | GY   | 3A | AX.89505805 | 6.60E+08 | 0.24 | 2.83  | 3.41 | 0.06 |
| E1 | GY   | 3A | AX.89707395 | 1.25E+07 | 0.33 | -2.41 | 3.11 | 0.04 |
| E1 | GY   | 3A | AX.89707395 | 1.25E+07 | 0.33 | -2.41 | 3.11 | 0.04 |
| E1 | GY   | 3A | AX.89753942 | 7.12E+08 | 0.20 | 2.83  | 3.12 | 0.05 |
| E1 | GY   | 3A | AX.89413621 | 5.67E+07 | 0.37 | -2.50 | 3.45 | 0.06 |
| E1 | GY   | 3A | AX.89413621 | 5.67E+07 | 0.37 | -2.50 | 3.45 | 0.06 |

|    |      |    |             |          |      |          |      |      |
|----|------|----|-------------|----------|------|----------|------|------|
| E1 | GY   | 3A | AX.89564968 | 6.59E+08 | 0.29 | 2.50     | 3.09 | 0.05 |
| E1 | GY   | 3A | AX.89353961 | 5.61E+07 | 0.38 | -2.49    | 3.45 | 0.06 |
| E1 | GY   | 3A | AX.89424557 | 5.71E+07 | 0.38 | -2.49    | 3.45 | 0.06 |
| E1 | GY   | 3A | AX.89581641 | 5.68E+07 | 0.37 | -2.50    | 3.45 | 0.06 |
| E1 | GY   | 3A | AX.89777576 | 6.25E+08 | 0.24 | 2.67     | 3.10 | 0.04 |
| E1 | GY   | 3A | AX.89650770 | 5.68E+07 | 0.38 | -2.49    | 3.45 | 0.06 |
| E1 | GY   | 3A | AX.89711077 | 7.11E+08 | 0.24 | 3.57     | 5.12 | 0.09 |
| E1 | GY   | 3A | AX.89725109 | 7.11E+08 | 0.06 | -6.47    | 5.27 | 0.09 |
| E1 | GY   | 3A | AX.89415949 | 7.11E+08 | 0.07 | -6.05    | 4.97 | 0.08 |
| E1 | GY   | 3A | AX.89461796 | 5.57E+08 | 0.05 | -5.95    | 3.66 | 0.07 |
| E1 | GY   | 3A | AX.89461796 | 5.57E+08 | 0.05 | -5.95    | 3.66 | 0.07 |
| E1 | GY   | 3A | AX.89325079 | 7.11E+08 | 0.07 | -5.78    | 4.86 | 0.08 |
| E1 | GY   | 3A | AX.89716020 | 6.12E+08 | 0.23 | -2.88    | 3.47 | 0.06 |
| E1 | GY   | 3A | AX.89359371 | 5.61E+07 | 0.38 | -2.49    | 3.45 | 0.06 |
| E1 | GY   | 3A | AX.89359371 | 5.61E+07 | 0.38 | -2.49    | 3.45 | 0.06 |
| E1 | GY   | 3A | AX.89740047 | 6.59E+08 | 0.28 | 2.51     | 3.06 | 0.05 |
| E1 | GY   | 3A | AX.89607034 | 5.64E+07 | 0.37 | -2.50    | 3.45 | 0.06 |
| E1 | GY   | 3A | AX.89655544 | 5.70E+07 | 0.38 | -2.49    | 3.45 | 0.06 |
| E1 | GY   | 3A | AX.89655544 | 5.70E+07 | 0.38 | -2.49    | 3.45 | 0.06 |
| E1 | GY   | 3A | AX.89360487 | 5.67E+07 | 0.37 | -2.50    | 3.45 | 0.06 |
| E1 | GY   | 3A | AX.89741338 | 7.11E+08 | 0.07 | -4.69    | 3.19 | 0.05 |
| E1 | GY   | 3A | AX.89753115 | 2.21E+05 | 0.49 | -2.40    | 3.41 | 0.05 |
| E1 | GY   | 3A | AX.89536603 | 5.70E+07 | 0.38 | -2.49    | 3.45 | 0.06 |
| E1 | GY   | 3A | AX.89396715 | 6.59E+08 | 0.29 | 2.60     | 3.30 | 0.06 |
| E1 | GY   | 3A | AX.89722953 | 1.16E+07 | 0.21 | 2.74     | 3.00 | 0.05 |
| E1 | GY   | 3A | AX.89719431 | 5.70E+07 | 0.38 | -2.49    | 3.45 | 0.06 |
| E1 | GY   | 3A | AX.89684368 | 7.12E+08 | 0.20 | 2.83     | 3.12 | 0.05 |
| E1 | GY   | 3A | AX.89658110 | 5.70E+07 | 0.38 | -2.49    | 3.45 | 0.06 |
| E1 | GY   | 3A | AX.89363091 | 5.61E+07 | 0.38 | -2.49    | 3.45 | 0.06 |
| E1 | GY   | 3A | AX.89363091 | 5.61E+07 | 0.38 | -2.49    | 3.45 | 0.06 |
| E1 | GY   | 3A | AX.89617932 | 5.16E+08 | 0.05 | -5.81    | 3.79 | 0.07 |
| E1 | GY   | 3A | AX.89732198 | 7.11E+08 | 0.07 | -5.26    | 4.12 | 0.07 |
| E1 | GY   | 3A | AX.89732198 | 7.11E+08 | 0.07 | -5.26    | 4.12 | 0.07 |
| E1 | GY   | 3A | AX.89626419 | 5.71E+07 | 0.42 | -2.55    | 3.69 | 0.06 |
| E1 | GY   | 3A | AX.89500862 | 5.71E+07 | 0.37 | -2.63    | 3.75 | 0.06 |
| E1 | GY   | 3A | AX.89500862 | 5.71E+07 | 0.37 | -2.63    | 3.75 | 0.06 |
| E1 | GY   | 3A | AX.89647537 | 7.11E+08 | 0.07 | -5.96    | 4.84 | 0.08 |
| E1 | GPM2 | 3A | AX.89395219 | 5.67E+07 | 0.38 | -632.10  | 3.36 | 0.06 |
| E1 | GPM2 | 3A | AX.89729691 | 7.43E+06 | 0.49 | -615.41  | 3.38 | 0.05 |
| E1 | GPM2 | 3A | AX.89628511 | 6.90E+06 | 0.37 | -610.03  | 3.13 | 0.05 |
| E1 | GPM2 | 3A | AX.89732524 | 5.67E+07 | 0.38 | -609.23  | 3.15 | 0.05 |
| E1 | GPM2 | 3A | AX.89559867 | 5.67E+07 | 0.38 | -639.74  | 3.44 | 0.06 |
| E1 | GPM2 | 3A | AX.89334290 | 1.15E+07 | 0.23 | 742.96   | 3.50 | 0.06 |
| E1 | GPM2 | 3A | AX.89603026 | 5.57E+08 | 0.05 | -1485.41 | 3.48 | 0.06 |
| E1 | GPM2 | 3A | AX.89354663 | 9.68E+04 | 0.35 | -710.73  | 4.00 | 0.06 |
| E1 | GY   | 3A | AX.89653072 | 5.70E+07 | 0.37 | -2.50    | 3.45 | 0.06 |
| E1 | GPM2 | 3A | AX.89546950 | 5.68E+07 | 0.37 | -654.03  | 3.55 | 0.06 |
| E1 | GPM2 | 3A | AX.89450866 | 1.18E+07 | 0.33 | 652.45   | 3.35 | 0.06 |
| E1 | GPM2 | 3A | AX.89411704 | 7.04E+08 | 0.30 | 679.84   | 3.44 | 0.05 |
| E1 | GY   | 3A | AX.89471074 | 7.19E+08 | 0.46 | -2.29    | 3.12 | 0.04 |



|    |      |    |             |          |      |          |      |      |
|----|------|----|-------------|----------|------|----------|------|------|
| E1 | GPM2 | 3A | AX.89529884 | 5.62E+07 | 0.37 | -654.03  | 3.55 | 0.06 |
| E1 | GPM2 | 3A | AX.89672273 | 5.61E+07 | 0.37 | -654.03  | 3.55 | 0.06 |
| E1 | GY   | 3A | AX.89530750 | 7.11E+08 | 0.06 | -6.47    | 5.27 | 0.09 |
| E1 | GY   | 3A | AX.89541934 | 1.14E+07 | 0.44 | 2.25     | 3.00 | 0.05 |
| E1 | GY   | 3A | AX.89731479 | 7.11E+08 | 0.06 | -6.47    | 5.27 | 0.09 |
| E1 | GPM2 | 3A | AX.89427948 | 5.67E+07 | 0.37 | -654.03  | 3.55 | 0.06 |
| E1 | GPM2 | 3A | AX.89637185 | 5.62E+07 | 0.36 | -682.24  | 3.78 | 0.06 |
| E1 | GY   | 3A | AX.89577141 | 6.40E+08 | 0.05 | -5.34    | 3.29 | 0.05 |
| E1 | GY   | 3A | AX.89577141 | 6.40E+08 | 0.05 | -5.34    | 3.29 | 0.05 |
| E1 | GPM2 | 3A | AX.89413621 | 5.67E+07 | 0.37 | -654.03  | 3.55 | 0.06 |
| E1 | GY   | 3A | AX.89736209 | 5.61E+07 | 0.37 | -2.50    | 3.45 | 0.06 |
| E1 | GPM2 | 3A | AX.89508580 | 5.61E+07 | 0.37 | -654.03  | 3.55 | 0.06 |
| E1 | GY   | 3A | AX.89532206 | 5.62E+07 | 0.38 | -2.49    | 3.45 | 0.06 |
| E1 | GY   | 3A | AX.89532206 | 5.62E+07 | 0.38 | -2.49    | 3.45 | 0.06 |
| E1 | GPM2 | 3A | AX.89497516 | 5.70E+07 | 0.38 | -639.74  | 3.44 | 0.06 |
| E1 | GY   | 3A | AX.89439144 | 1.10E+07 | 0.32 | 2.41     | 3.04 | 0.05 |
| E1 | GY   | 3A | AX.89439144 | 1.10E+07 | 0.32 | 2.41     | 3.04 | 0.05 |
| E1 | GY   | 3A | AX.89497516 | 5.70E+07 | 0.38 | -2.49    | 3.45 | 0.06 |
| E1 | GPM2 | 3A | AX.89765950 | 7.17E+06 | 0.34 | 708.02   | 3.92 | 0.07 |
| E1 | GPM2 | 3A | AX.89458621 | 5.67E+07 | 0.37 | -654.03  | 3.55 | 0.06 |
| E1 | GY   | 3A | AX.89417627 | 7.12E+08 | 0.20 | 2.83     | 3.12 | 0.05 |
| E1 | GPM2 | 3A | AX.89373966 | 5.64E+07 | 0.37 | -654.03  | 3.55 | 0.06 |
| E1 | GY   | 3A | AX.89676793 | 5.70E+07 | 0.38 | -2.49    | 3.45 | 0.06 |
| E1 | GY   | 3A | AX.89616067 | 5.68E+07 | 0.37 | -2.50    | 3.45 | 0.06 |
| E1 | GPM2 | 3A | AX.89502635 | 5.71E+07 | 0.39 | -595.67  | 3.06 | 0.05 |
| E1 | GPM2 | 3A | AX.89412589 | 5.62E+07 | 0.38 | -639.74  | 3.44 | 0.06 |
| E1 | GY   | 3A | AX.89552884 | 7.11E+08 | 0.11 | -5.49    | 6.26 | 0.10 |
| E1 | GPM2 | 3A | AX.89753115 | 2.21E+05 | 0.49 | -657.87  | 3.80 | 0.06 |
| E1 | GY   | 3A | AX.89763365 | 6.59E+08 | 0.29 | 2.60     | 3.30 | 0.06 |
| E1 | GPM2 | 3A | AX.89642626 | 7.09E+08 | 0.10 | -1032.15 | 3.48 | 0.06 |
| E1 | GPM2 | 3A | AX.89357150 | 7.09E+08 | 0.07 | -1191.77 | 3.13 | 0.05 |
| E1 | GPM2 | 3A | AX.89616067 | 5.68E+07 | 0.37 | -654.03  | 3.55 | 0.06 |
| E1 | GPM2 | 3A | AX.89391530 | 1.60E+06 | 0.33 | -685.54  | 3.64 | 0.06 |
| E1 | GY   | 3A | AX.89690421 | 7.14E+08 | 0.38 | 2.30     | 3.00 | 0.05 |
| E1 | GPM2 | 3A | AX.89392516 | 2.27E+05 | 0.50 | 665.26   | 3.87 | 0.06 |
| E1 | GY   | 3A | AX.89724076 | 7.19E+08 | 0.46 | -2.29    | 3.12 | 0.04 |
| E1 | GY   | 3A | AX.89724076 | 7.19E+08 | 0.46 | -2.29    | 3.12 | 0.04 |
| E1 | GY   | 3A | AX.89406798 | 2.06E+05 | 0.35 | 2.40     | 3.14 | 0.06 |
| E1 | GY   | 3A | AX.89406798 | 2.06E+05 | 0.35 | 2.40     | 3.14 | 0.06 |
| E1 | GY   | 3A | AX.89577247 | 5.67E+07 | 0.37 | -2.50    | 3.45 | 0.06 |
| E1 | GPM2 | 3A | AX.89468093 | 1.18E+07 | 0.29 | 642.67   | 3.10 | 0.05 |
| E1 | GPM2 | 3A | AX.89660760 | 1.52E+06 | 0.34 | -624.90  | 3.18 | 0.05 |
| E1 | GPM2 | 3A | AX.89484211 | 5.70E+07 | 0.38 | -639.74  | 3.44 | 0.06 |
| E1 | GPM2 | 3A | AX.89318922 | 5.67E+07 | 0.37 | -654.03  | 3.55 | 0.06 |
| E1 | GPM2 | 3A | AX.89623534 | 1.39E+06 | 0.36 | -663.27  | 3.58 | 0.05 |
| E1 | GY   | 3A | AX.89326089 | 5.67E+07 | 0.37 | -2.50    | 3.45 | 0.06 |
| E1 | GY   | 3A | AX.89705622 | 5.64E+07 | 0.37 | -2.50    | 3.45 | 0.06 |
| E1 | GY   | 3A | AX.89546950 | 5.68E+07 | 0.37 | -2.50    | 3.45 | 0.06 |
| E1 | GPM2 | 3A | AX.89655417 | 6.26E+06 | 0.41 | -594.56  | 3.10 | 0.05 |
| E1 | GY   | 3A | AX.89626555 | 6.59E+08 | 0.28 | 2.73     | 3.52 | 0.06 |

|    |      |    |             |          |      |         |      |      |
|----|------|----|-------------|----------|------|---------|------|------|
| E1 | GY   | 3A | AX.89753188 | 5.61E+07 | 0.37 | -2.50   | 3.45 | 0.06 |
| E1 | GY   | 3A | AX.89514349 | 5.70E+07 | 0.38 | -2.49   | 3.45 | 0.06 |
| E1 | GY   | 3A | AX.89604070 | 5.70E+07 | 0.38 | -2.49   | 3.45 | 0.06 |
| E1 | GY   | 3A | AX.89432808 | 5.58E+07 | 0.37 | -2.50   | 3.45 | 0.06 |
| E1 | GPM2 | 3A | AX.89553150 | 4.22E+05 | 0.37 | -617.82 | 3.22 | 0.05 |
| E1 | GPM2 | 3A | AX.89531199 | 5.57E+07 | 0.37 | -654.03 | 3.55 | 0.06 |
| E1 | GPM2 | 3A | AX.89551243 | 6.23E+08 | 0.23 | 705.86  | 3.21 | 0.05 |
| E1 | GY   | 3A | AX.89564685 | 5.17E+08 | 0.05 | -6.25   | 3.98 | 0.08 |
| E1 | GPM2 | 3A | AX.89359371 | 5.61E+07 | 0.38 | -639.74 | 3.44 | 0.06 |
| E1 | GY   | 3A | AX.89445155 | 5.67E+07 | 0.37 | -2.50   | 3.45 | 0.06 |
| E1 | GPS  | 3A | AX.89552884 | 7.11E+08 | 0.11 | -1.98   | 3.58 | 0.06 |
| E1 | GY   | 3A | AX.89745936 | 7.11E+08 | 0.20 | 2.83    | 3.12 | 0.05 |
| E1 | GPS  | 3A | AX.89446558 | 7.11E+08 | 0.07 | -2.32   | 3.18 | 0.05 |
| E1 | GY   | 3A | AX.89631354 | 5.16E+08 | 0.05 | -5.81   | 3.79 | 0.07 |
| E1 | GY   | 3A | AX.89631354 | 5.16E+08 | 0.05 | -5.81   | 3.79 | 0.07 |
| E1 | GPM2 | 3A | AX.89389285 | 1.18E+07 | 0.33 | 652.45  | 3.35 | 0.06 |
| E1 | GPM2 | 3A | AX.89461923 | 5.61E+07 | 0.38 | -609.23 | 3.15 | 0.05 |
| E1 | GPM2 | 3A | AX.89652632 | 1.04E+07 | 0.23 | 686.44  | 3.02 | 0.05 |
| E1 | GPS  | 3A | AX.89471595 | 7.11E+08 | 0.07 | -2.32   | 3.18 | 0.05 |
| E1 | GPS  | 3A | AX.89530750 | 7.11E+08 | 0.06 | -2.38   | 3.13 | 0.05 |
| E1 | GPS  | 3A | AX.89649354 | 7.11E+08 | 0.06 | -2.38   | 3.13 | 0.05 |
| E1 | GPM2 | 3A | AX.89424557 | 5.71E+07 | 0.38 | -639.74 | 3.44 | 0.06 |
| E1 | GY   | 3A | AX.89550109 | 5.70E+07 | 0.38 | -2.49   | 3.45 | 0.06 |
| E1 | GPM2 | 3A | AX.89382764 | 1.38E+06 | 0.36 | -663.27 | 3.58 | 0.05 |
| E1 | GY   | 3A | AX.89645968 | 5.71E+07 | 0.38 | -2.49   | 3.45 | 0.06 |
| E1 | GY   | 3A | AX.89634345 | 7.11E+08 | 0.06 | -5.83   | 4.10 | 0.07 |
| E1 | GY   | 3A | AX.89732524 | 5.67E+07 | 0.38 | -2.52   | 3.50 | 0.06 |
| E1 | GPM2 | 3A | AX.89607034 | 5.64E+07 | 0.37 | -654.03 | 3.55 | 0.06 |
| E1 | GY   | 3A | AX.89563227 | 7.10E+08 | 0.07 | -4.87   | 3.40 | 0.06 |
| E1 | GY   | 3A | AX.89563227 | 7.10E+08 | 0.07 | -4.87   | 3.40 | 0.06 |
| E1 | GY   | 3A | AX.89602017 | 5.61E+07 | 0.38 | -2.49   | 3.45 | 0.06 |
| E1 | GPM2 | 3A | AX.89655544 | 5.70E+07 | 0.38 | -639.74 | 3.44 | 0.06 |
| E1 | GPM2 | 3A | AX.89543993 | 6.23E+08 | 0.23 | 705.86  | 3.21 | 0.05 |
| E1 | GY   | 3A | AX.89423759 | 5.62E+07 | 0.38 | -2.52   | 3.50 | 0.06 |
| E1 | GY   | 3A | AX.89660075 | 9.67E+04 | 0.35 | 2.40    | 3.14 | 0.06 |
| E1 | GY   | 3A | AX.89734012 | 5.64E+08 | 0.06 | -5.29   | 3.46 | 0.07 |
| E1 | GPM2 | 3A | AX.89398270 | 5.67E+07 | 0.37 | -654.03 | 3.55 | 0.06 |
| E1 | GPM2 | 3A | AX.89499517 | 5.70E+07 | 0.38 | -639.74 | 3.44 | 0.06 |
| E1 | GPM2 | 3A | AX.89313133 | 5.67E+07 | 0.38 | -639.74 | 3.44 | 0.06 |
| E1 | GPM2 | 3A | AX.89569458 | 7.26E+06 | 0.47 | 624.14  | 3.46 | 0.05 |
| E1 | GPS  | 3A | AX.89646447 | 7.11E+08 | 0.06 | -2.38   | 3.13 | 0.05 |
| E1 | GY   | 3A | AX.89556622 | 6.59E+08 | 0.28 | 2.52    | 3.10 | 0.05 |
| E1 | GY   | 3A | AX.89418431 | 5.65E+08 | 0.06 | -5.29   | 3.46 | 0.07 |
| E1 | GPM2 | 3A | AX.89322500 | 5.62E+07 | 0.38 | -639.74 | 3.44 | 0.06 |
| E1 | GPM2 | 3A | AX.89415372 | 7.22E+06 | 0.39 | 605.86  | 3.16 | 0.04 |
| E1 | GPM2 | 3A | AX.89539719 | 5.67E+07 | 0.37 | -654.03 | 3.55 | 0.06 |
| E1 | GPS  | 3A | AX.89725109 | 7.11E+08 | 0.06 | -2.38   | 3.13 | 0.05 |
| E1 | GPM2 | 3A | AX.89684384 | 5.70E+07 | 0.38 | -639.74 | 3.44 | 0.06 |
| E1 | GPM2 | 3A | AX.89604070 | 5.70E+07 | 0.38 | -639.74 | 3.44 | 0.06 |
| E1 | GPM2 | 3A | AX.89676793 | 5.70E+07 | 0.38 | -639.74 | 3.44 | 0.06 |

|    |      |    |             |          |      |         |      |      |
|----|------|----|-------------|----------|------|---------|------|------|
| E1 | GPM2 | 3A | AX.89409977 | 9.90E+04 | 0.40 | -838.55 | 5.64 | 0.09 |
| E1 | GPM2 | 3A | AX.89338545 | 5.71E+07 | 0.38 | -639.74 | 3.44 | 0.06 |
| E1 | GPM2 | 3A | AX.89346739 | 2.07E+05 | 0.34 | -653.40 | 3.44 | 0.05 |
| E1 | GPM2 | 3A | AX.89645252 | 1.18E+07 | 0.30 | 636.43  | 3.08 | 0.05 |
| E1 | GPS  | 3A | AX.89371144 | 7.11E+08 | 0.06 | -2.38   | 3.13 | 0.05 |
| E1 | GPM2 | 3A | AX.89378945 | 5.68E+07 | 0.37 | -654.03 | 3.55 | 0.06 |
| E1 | GPM2 | 3A | AX.89416077 | 5.70E+07 | 0.38 | -639.74 | 3.44 | 0.06 |
| E1 | GY   | 3A | AX.89683629 | 6.59E+08 | 0.28 | 2.73    | 3.52 | 0.06 |
| E1 | GPM2 | 3A | AX.89372086 | 5.57E+07 | 0.37 | -654.03 | 3.55 | 0.06 |
| E1 | GY   | 3A | AX.89567118 | 5.67E+07 | 0.37 | -2.50   | 3.45 | 0.06 |
| E1 | GY   | 3A | AX.89450721 | 6.34E+08 | 0.41 | 2.41    | 3.34 | 0.06 |
| E1 | GPM2 | 3A | AX.89536450 | 5.68E+07 | 0.38 | -639.74 | 3.44 | 0.06 |
| E1 | GPM2 | 3A | AX.89490667 | 5.71E+07 | 0.39 | -647.25 | 3.53 | 0.06 |
| E1 | GY   | 3A | AX.89733840 | 2.07E+05 | 0.35 | 2.40    | 3.14 | 0.06 |
| E1 | GY   | 3A | AX.89416353 | 7.11E+08 | 0.24 | 3.52    | 5.00 | 0.09 |
| E1 | GPM2 | 3A | AX.89530564 | 7.25E+06 | 0.41 | 609.68  | 3.25 | 0.05 |
| E1 | GPM2 | 3A | AX.89320189 | 5.61E+07 | 0.38 | -639.74 | 3.44 | 0.06 |
| E1 | GPM2 | 3A | AX.89475487 | 5.67E+07 | 0.37 | -654.03 | 3.55 | 0.06 |
| E1 | GPM2 | 3A | AX.89516008 | 6.90E+06 | 0.37 | -610.03 | 3.13 | 0.05 |
| E1 | GPM2 | 3A | AX.89658110 | 5.70E+07 | 0.38 | -639.74 | 3.44 | 0.06 |
| E1 | GPM2 | 3A | AX.89697914 | 5.71E+07 | 0.38 | -639.74 | 3.44 | 0.06 |
| E1 | GY   | 3A | AX.89556938 | 6.59E+08 | 0.29 | 2.60    | 3.30 | 0.06 |
| E1 | GPM2 | 3A | AX.89755885 | 5.64E+07 | 0.38 | -639.74 | 3.44 | 0.06 |
| E1 | GPM2 | 3A | AX.89554883 | 5.67E+07 | 0.38 | -609.23 | 3.15 | 0.05 |
| E1 | GPM2 | 3A | AX.89408108 | 7.26E+06 | 0.45 | 670.93  | 3.90 | 0.06 |
| E1 | GY   | 3A | AX.89499517 | 5.70E+07 | 0.38 | -2.49   | 3.45 | 0.06 |
| E1 | GY   | 3A | AX.89499517 | 5.70E+07 | 0.38 | -2.49   | 3.45 | 0.06 |
| E1 | GPM2 | 3A | AX.89547815 | 1.89E+06 | 0.49 | 601.21  | 3.25 | 0.05 |
| E1 | GPS  | 3A | AX.89731479 | 7.11E+08 | 0.06 | -2.38   | 3.13 | 0.05 |
| E1 | GPM2 | 3A | AX.89345333 | 5.62E+07 | 0.37 | -654.03 | 3.55 | 0.06 |
| E1 | GPM2 | 3A | AX.89416520 | 5.70E+07 | 0.38 | -639.74 | 3.44 | 0.06 |
| E1 | GPS  | 3A | AX.89652632 | 1.04E+07 | 0.23 | 1.33    | 3.07 | 0.05 |
| E1 | GY   | 3A | AX.89489326 | 7.11E+08 | 0.07 | -4.69   | 3.19 | 0.05 |
| E1 | GPM2 | 3A | AX.89549204 | 5.64E+07 | 0.38 | -639.74 | 3.44 | 0.06 |
| E1 | GPS  | 3A | AX.89716020 | 6.12E+08 | 0.23 | -1.36   | 3.21 | 0.06 |
| E1 | GY   | 3A | AX.89680239 | 6.25E+08 | 0.47 | -2.27   | 3.07 | 0.05 |
| E1 | GPM2 | 3A | AX.89530250 | 5.67E+07 | 0.37 | -654.03 | 3.55 | 0.06 |
| E1 | GPM2 | 3A | AX.89626419 | 5.71E+07 | 0.42 | -586.23 | 3.05 | 0.05 |
| E1 | GY   | 3A | AX.89766111 | 5.68E+07 | 0.38 | -2.49   | 3.45 | 0.06 |
| E1 | GY   | 3A | AX.89559269 | 5.61E+07 | 0.39 | -2.51   | 3.51 | 0.06 |
| E1 | GPM2 | 3A | AX.89437855 | 5.68E+07 | 0.38 | -671.04 | 3.72 | 0.06 |
| E1 | GY   | 3A | AX.89741338 | 7.11E+08 | 0.07 | -4.69   | 3.19 | 0.05 |
| E1 | GPM2 | 3A | AX.89468914 | 5.68E+07 | 0.37 | -654.03 | 3.55 | 0.06 |
| E1 | GPM2 | 3A | AX.89363091 | 5.61E+07 | 0.38 | -639.74 | 3.44 | 0.06 |
| E1 | GPM2 | 3A | AX.89421469 | 5.64E+07 | 0.38 | -639.74 | 3.44 | 0.06 |
| E1 | GY   | 3A | AX.89765606 | 7.11E+08 | 0.24 | 3.52    | 5.00 | 0.09 |
| E1 | GPM2 | 3A | AX.89632417 | 1.14E+07 | 0.31 | 628.31  | 3.08 | 0.05 |
| E1 | GY   | 3A | AX.89597151 | 6.60E+08 | 0.24 | 2.83    | 3.41 | 0.06 |
| E1 | GY   | 3A | AX.89445039 | 7.11E+08 | 0.06 | -6.47   | 5.27 | 0.09 |
| E1 | GPM2 | 3A | AX.89500862 | 5.71E+07 | 0.37 | -666.93 | 3.67 | 0.06 |

|    |      |    |             |          |      |         |      |      |
|----|------|----|-------------|----------|------|---------|------|------|
| E1 | GPM2 | 3A | AX.89628180 | 1.92E+06 | 0.36 | 621.11  | 3.22 | 0.04 |
| E1 | GPM2 | 3A | AX.89486754 | 2.25E+05 | 0.49 | -657.87 | 3.80 | 0.06 |
| E1 | GY   | 3A | AX.89598815 | 5.67E+07 | 0.37 | -2.50   | 3.45 | 0.06 |
| E1 | GY   | 3A | AX.89626419 | 5.71E+07 | 0.42 | -2.55   | 3.69 | 0.06 |
| E1 | GPM2 | 3A | AX.89580969 | 6.23E+08 | 0.23 | 705.86  | 3.21 | 0.05 |
| E1 | GPM2 | 3A | AX.89463578 | 3.72E+05 | 0.35 | -690.21 | 3.80 | 0.06 |
| E1 | GPM2 | 3A | AX.89461667 | 7.27E+06 | 0.42 | 619.30  | 3.35 | 0.05 |
| E1 | GPM2 | 3A | AX.89645968 | 5.71E+07 | 0.38 | -639.74 | 3.44 | 0.06 |
| E1 | GY   | 3A | AX.89723050 | 5.61E+07 | 0.38 | -2.49   | 3.45 | 0.06 |
| E1 | GY   | 3A | AX.89637550 | 1.60E+05 | 0.50 | -2.30   | 3.17 | 0.04 |
| E1 | GPM2 | 3A | AX.89577247 | 5.67E+07 | 0.37 | -654.03 | 3.55 | 0.06 |
| E1 | GPM2 | 3A | AX.89753188 | 5.61E+07 | 0.37 | -654.03 | 3.55 | 0.06 |
| E1 | GY   | 3A | AX.89490667 | 5.71E+07 | 0.39 | -2.46   | 3.38 | 0.05 |
| E1 | GPM2 | 3A | AX.89358928 | 5.71E+07 | 0.38 | -639.74 | 3.44 | 0.06 |
| E1 | GY   | 3A | AX.89529884 | 5.62E+07 | 0.37 | -2.50   | 3.45 | 0.06 |
| E1 | GPM2 | 3A | AX.89421502 | 1.52E+06 | 0.33 | -699.95 | 3.80 | 0.06 |
| E1 | GY   | 3A | AX.89600503 | 5.68E+07 | 0.38 | -2.49   | 3.45 | 0.06 |
| E1 | GY   | 3A | AX.89600503 | 5.68E+07 | 0.38 | -2.49   | 3.45 | 0.06 |
| E1 | GPM2 | 3A | AX.89467246 | 5.70E+07 | 0.38 | -639.74 | 3.44 | 0.06 |
| E1 | GPM2 | 3A | AX.89347777 | 5.68E+07 | 0.37 | -654.03 | 3.55 | 0.06 |
| E1 | GY   | 3A | AX.89698074 | 6.93E+07 | 0.33 | -2.43   | 3.14 | 0.05 |
| E1 | GY   | 3A | AX.89458621 | 5.67E+07 | 0.37 | -2.50   | 3.45 | 0.06 |
| E1 | GY   | 3A | AX.89753942 | 7.12E+08 | 0.20 | 2.83    | 3.12 | 0.05 |
| E1 | GPM2 | 3A | AX.89726966 | 5.67E+07 | 0.37 | -654.03 | 3.55 | 0.06 |
| E1 | GY   | 3A | AX.89353961 | 5.61E+07 | 0.38 | -2.49   | 3.45 | 0.06 |
| E1 | GPM2 | 3A | AX.89756161 | 5.62E+07 | 0.38 | -639.74 | 3.44 | 0.06 |
| E1 | GPM2 | 3A | AX.89637093 | 5.70E+07 | 0.38 | -639.74 | 3.44 | 0.06 |
| E1 | GPM2 | 3A | AX.89595635 | 5.62E+07 | 0.37 | -654.03 | 3.55 | 0.06 |
| E1 | GY   | 3A | AX.89585123 | 5.16E+08 | 0.05 | -5.81   | 3.79 | 0.07 |
| E1 | GY   | 3A | AX.89581641 | 5.68E+07 | 0.37 | -2.50   | 3.45 | 0.06 |
| E1 | GY   | 3A | AX.89699257 | 5.67E+07 | 0.37 | -2.47   | 3.34 | 0.05 |
| E1 | GPM2 | 3A | AX.89748055 | 5.64E+07 | 0.37 | -654.03 | 3.55 | 0.06 |
| E1 | GPM2 | 3A | AX.89748618 | 5.67E+07 | 0.37 | -654.03 | 3.55 | 0.06 |
| E1 | GY   | 3A | AX.89654923 | 6.93E+07 | 0.33 | -2.43   | 3.14 | 0.05 |
| E1 | GPM2 | 3A | AX.89719431 | 5.70E+07 | 0.38 | -639.74 | 3.44 | 0.06 |
| E1 | GPM2 | 3A | AX.89550109 | 5.70E+07 | 0.38 | -639.74 | 3.44 | 0.06 |
| E1 | GY   | 3A | AX.89650770 | 5.68E+07 | 0.38 | -2.49   | 3.45 | 0.06 |
| E1 | GPM2 | 3A | AX.89313868 | 5.67E+07 | 0.39 | -595.67 | 3.06 | 0.05 |
| E1 | GPM2 | 3A | AX.89573099 | 5.67E+07 | 0.37 | -654.03 | 3.55 | 0.06 |
| E1 | GY   | 3A | AX.89711077 | 7.11E+08 | 0.24 | 3.57    | 5.12 | 0.09 |
| E1 | GY   | 3A | AX.89392516 | 2.27E+05 | 0.50 | 2.51    | 3.67 | 0.06 |
| E1 | GY   | 3A | AX.89395219 | 5.67E+07 | 0.38 | -2.40   | 3.22 | 0.05 |
| E1 | GY   | 3A | AX.89360487 | 5.67E+07 | 0.37 | -2.50   | 3.45 | 0.06 |
| E1 | GY   | 3A | AX.89753115 | 2.21E+05 | 0.49 | -2.40   | 3.41 | 0.05 |
| E1 | GY   | 3A | AX.89536603 | 5.70E+07 | 0.38 | -2.49   | 3.45 | 0.06 |
| E1 | GPM2 | 3A | AX.89716020 | 6.12E+08 | 0.23 | -774.05 | 3.76 | 0.06 |
| E1 | GY   | 3A | AX.89722953 | 1.16E+07 | 0.21 | 2.74    | 3.00 | 0.05 |
| E1 | GY   | 3A | AX.89719431 | 5.70E+07 | 0.38 | -2.49   | 3.45 | 0.06 |
| E1 | GY   | 3A | AX.89632417 | 1.14E+07 | 0.31 | 2.73    | 3.71 | 0.07 |
| E1 | GY   | 3A | AX.89632417 | 1.14E+07 | 0.31 | 2.73    | 3.71 | 0.07 |

|    |      |    |             |          |      |          |      |      |
|----|------|----|-------------|----------|------|----------|------|------|
| E1 | GY   | 3A | AX.89755194 | 7.12E+08 | 0.20 | 2.83     | 3.12 | 0.05 |
| E1 | GY   | 3A | AX.89540978 | 5.44E+08 | 0.05 | -6.25    | 3.98 | 0.08 |
| E1 | GPM2 | 3A | AX.89410438 | 2.25E+05 | 0.50 | -580.45  | 3.06 | 0.04 |
| E1 | GPM2 | 3A | AX.89563517 | 7.20E+06 | 0.45 | 670.93   | 3.90 | 0.06 |
| E1 | GPM2 | 3A | AX.89452532 | 9.90E+04 | 0.35 | -664.54  | 3.57 | 0.05 |
| E1 | GY   | 3A | AX.89653072 | 5.70E+07 | 0.37 | -2.50    | 3.45 | 0.06 |
| E1 | GPM2 | 3A | AX.89476226 | 5.70E+07 | 0.38 | -639.74  | 3.44 | 0.06 |
| E1 | GY   | 3A | AX.89723196 | 1.14E+07 | 0.32 | 2.43     | 3.06 | 0.05 |
| E1 | GPM2 | 3A | AX.89353961 | 5.61E+07 | 0.38 | -639.74  | 3.44 | 0.06 |
| E1 | GPM2 | 3A | AX.89407423 | 5.38E+07 | 0.07 | -1176.98 | 3.07 | 0.05 |
| E1 | GPM2 | 3A | AX.89463175 | 5.61E+07 | 0.38 | -639.74  | 3.44 | 0.06 |
| E1 | GPM2 | 3A | AX.89467487 | 7.31E+06 | 0.42 | 619.30   | 3.35 | 0.05 |
| E1 | GY   | 3A | AX.89549948 | 5.70E+07 | 0.38 | -2.49    | 3.45 | 0.06 |
| E1 | GPM2 | 3A | AX.89759598 | 1.18E+07 | 0.33 | 652.45   | 3.35 | 0.06 |
| E1 | GY   | 3A | AX.89508580 | 5.61E+07 | 0.37 | -2.50    | 3.45 | 0.06 |
| E1 | GPM2 | 3A | AX.89371520 | 5.70E+07 | 0.38 | -639.74  | 3.44 | 0.06 |
| E1 | GPM2 | 3A | AX.89326987 | 5.64E+07 | 0.38 | -639.74  | 3.44 | 0.06 |
| E1 | GY   | 3A | AX.89497516 | 5.70E+07 | 0.38 | -2.49    | 3.45 | 0.06 |
| E1 | GPM2 | 3A | AX.89477720 | 5.71E+07 | 0.38 | -639.74  | 3.44 | 0.06 |
| E1 | GPM2 | 3A | AX.89670742 | 7.09E+08 | 0.10 | -1032.15 | 3.48 | 0.06 |
| E1 | GPM2 | 3A | AX.89587706 | 1.78E+05 | 0.35 | -726.07  | 4.17 | 0.07 |
| E1 | GY   | 3A | AX.89357150 | 7.09E+08 | 0.07 | -4.53    | 3.01 | 0.05 |
| E1 | GPM2 | 3A | AX.89445155 | 5.67E+07 | 0.37 | -654.03  | 3.55 | 0.06 |
| E1 | GPM2 | 3A | AX.89471055 | 1.29E+06 | 0.34 | -653.40  | 3.44 | 0.05 |
| E1 | GPM2 | 3A | AX.89356377 | 5.62E+07 | 0.37 | -654.03  | 3.55 | 0.06 |
| E1 | GPM2 | 3A | AX.89639547 | 1.18E+07 | 0.33 | 652.45   | 3.35 | 0.06 |
| E1 | GPM2 | 3A | AX.89667791 | 4.17E+05 | 0.34 | -700.37  | 3.85 | 0.06 |
| E1 | GPM2 | 3A | AX.89417960 | 5.69E+07 | 0.37 | -654.03  | 3.55 | 0.06 |
| E1 | GY   | 3A | AX.89617804 | 6.93E+07 | 0.33 | -2.43    | 3.14 | 0.05 |
| E1 | GY   | 3A | AX.89371520 | 5.70E+07 | 0.38 | -2.49    | 3.45 | 0.06 |
| E1 | GY   | 3A | AX.89485992 | 5.64E+07 | 0.37 | -2.50    | 3.45 | 0.06 |
| E1 | SPM2 | 3A | AX.89420905 | 2.36E+07 | 0.13 | 29.06    | 4.29 | 0.08 |
| E1 | GPM2 | 3A | AX.89736209 | 5.61E+07 | 0.37 | -654.03  | 3.55 | 0.06 |
| E1 | GPM2 | 3A | AX.89699257 | 5.67E+07 | 0.37 | -666.58  | 3.65 | 0.06 |
| E1 | GPM2 | 3A | AX.89483235 | 7.09E+06 | 0.37 | -610.03  | 3.13 | 0.05 |
| E1 | GPM2 | 3A | AX.89600503 | 5.68E+07 | 0.38 | -639.74  | 3.44 | 0.06 |
| E1 | GPM2 | 3A | AX.89498068 | 7.28E+06 | 0.37 | -600.16  | 3.06 | 0.04 |
| E1 | GPM2 | 3A | AX.89397074 | 5.61E+07 | 0.38 | -639.74  | 3.44 | 0.06 |
| E1 | GPM2 | 3A | AX.89414130 | 7.09E+06 | 0.37 | -610.03  | 3.13 | 0.05 |
| E1 | GPS  | 3A | AX.89337319 | 7.11E+08 | 0.06 | -2.38    | 3.13 | 0.05 |
| E1 | GPM2 | 3A | AX.89602017 | 5.61E+07 | 0.38 | -639.74  | 3.44 | 0.06 |
| E1 | GY   | 3A | AX.89564685 | 5.17E+08 | 0.05 | -6.25    | 3.98 | 0.08 |
| E1 | GPM2 | 3A | AX.89567118 | 5.67E+07 | 0.37 | -654.03  | 3.55 | 0.06 |
| E1 | GPM2 | 3A | AX.89344030 | 5.71E+07 | 0.37 | -741.73  | 4.39 | 0.08 |
| E1 | GY   | 3A | AX.89636418 | 5.64E+07 | 0.37 | -2.50    | 3.45 | 0.06 |
| E1 | GPM2 | 3A | AX.89650770 | 5.68E+07 | 0.38 | -639.74  | 3.44 | 0.06 |
| E1 | GPM2 | 3A | AX.89532206 | 5.62E+07 | 0.38 | -639.74  | 3.44 | 0.06 |
| E1 | GPM2 | 3A | AX.89517433 | 5.57E+07 | 0.37 | -654.03  | 3.55 | 0.06 |
| E1 | GPM2 | 3A | AX.89640393 | 4.31E+05 | 0.34 | -700.37  | 3.85 | 0.06 |
| E1 | GPM2 | 3A | AX.89423759 | 5.62E+07 | 0.38 | -609.23  | 3.15 | 0.05 |

|    |      |    |             |          |      |          |      |      |
|----|------|----|-------------|----------|------|----------|------|------|
| E1 | GY   | 3A | AX.89573099 | 5.67E+07 | 0.37 | -2.50    | 3.45 | 0.06 |
| E1 | GPM2 | 3A | AX.89409258 | 7.09E+06 | 0.37 | -610.03  | 3.13 | 0.05 |
| E1 | GPM2 | 3A | AX.89502639 | 5.68E+07 | 0.37 | -654.03  | 3.55 | 0.06 |
| E1 | GPM2 | 3A | AX.89445873 | 5.57E+08 | 0.05 | -1485.41 | 3.48 | 0.06 |
| E1 | GPM2 | 3A | AX.89620261 | 7.22E+06 | 0.43 | 656.66   | 3.72 | 0.05 |
| E1 | GPM2 | 3A | AX.89370524 | 7.21E+06 | 0.42 | 619.30   | 3.35 | 0.05 |
| E1 | GPM2 | 3A | AX.89743861 | 7.26E+06 | 0.45 | 670.93   | 3.90 | 0.06 |
| E1 | GY   | 3A | AX.89504535 | 6.25E+08 | 0.48 | -2.42    | 3.44 | 0.05 |
| E1 | GPS  | 3A | AX.89768286 | 7.11E+08 | 0.06 | -2.38    | 3.13 | 0.05 |
| E1 | GPM2 | 3A | AX.89543452 | 1.14E+07 | 0.30 | 688.88   | 3.55 | 0.06 |
| E1 | GPM2 | 3A | AX.89450737 | 5.70E+07 | 0.37 | -654.03  | 3.55 | 0.06 |
| E1 | GPM2 | 3A | AX.89427924 | 5.61E+07 | 0.37 | -654.03  | 3.55 | 0.06 |
| E1 | GPM2 | 3A | AX.89705622 | 5.64E+07 | 0.37 | -654.03  | 3.55 | 0.06 |
| E1 | GPM2 | 3A | AX.89360803 | 5.62E+07 | 0.38 | -639.74  | 3.44 | 0.06 |
| E1 | GPM2 | 3A | AX.89690421 | 7.14E+08 | 0.38 | 596.12   | 3.04 | 0.05 |
| E1 | GPM2 | 3A | AX.89701379 | 5.20E+08 | 0.05 | -1606.01 | 3.98 | 0.07 |
| E1 | GPM2 | 3A | AX.89653072 | 5.70E+07 | 0.37 | -654.03  | 3.55 | 0.06 |
| E1 | GPM2 | 3A | AX.89402066 | 7.19E+08 | 0.22 | -777.44  | 3.65 | 0.06 |
| E1 | GPM2 | 3A | AX.89636653 | 1.18E+07 | 0.33 | 652.45   | 3.35 | 0.06 |
| E1 | GPM2 | 3A | AX.89471245 | 1.02E+07 | 0.32 | 637.42   | 3.20 | 0.06 |
| E1 | GPM2 | 3A | AX.89549519 | 7.26E+06 | 0.42 | 619.30   | 3.35 | 0.05 |
| E1 | GY   | 3A | AX.89543199 | 5.06E+08 | 0.06 | -4.93    | 3.08 | 0.06 |
| E1 | GPM2 | 3A | AX.89598815 | 5.67E+07 | 0.37 | -654.03  | 3.55 | 0.06 |
| E1 | GPM2 | 3A | AX.89326089 | 5.67E+07 | 0.37 | -654.03  | 3.55 | 0.06 |
| E1 | GPM2 | 3A | AX.89464016 | 5.64E+07 | 0.37 | -654.03  | 3.55 | 0.06 |
| E1 | GPS  | 3A | AX.89415949 | 7.11E+08 | 0.07 | -2.32    | 3.18 | 0.05 |
| E1 | GPM2 | 3A | AX.89536603 | 5.70E+07 | 0.38 | -639.74  | 3.44 | 0.06 |
| E1 | GPM2 | 3A | AX.89468962 | 7.21E+06 | 0.45 | 670.93   | 3.90 | 0.06 |
| E1 | GPM2 | 3A | AX.89360487 | 5.67E+07 | 0.37 | -654.03  | 3.55 | 0.06 |
| E1 | GPM2 | 3A | AX.89749604 | 5.64E+07 | 0.37 | -654.03  | 3.55 | 0.06 |
| E1 | GPM2 | 3A | AX.89414288 | 7.28E+06 | 0.37 | -600.16  | 3.06 | 0.04 |
| E1 | GPM2 | 3A | AX.89485992 | 5.64E+07 | 0.37 | -654.03  | 3.55 | 0.06 |
| E1 | GPM2 | 3A | AX.89740185 | 5.57E+07 | 0.38 | -639.74  | 3.44 | 0.06 |
| E1 | GPM2 | 3A | AX.89410914 | 5.70E+07 | 0.38 | -639.74  | 3.44 | 0.06 |
| E1 | GPM2 | 3A | AX.89740631 | 7.26E+06 | 0.42 | 619.30   | 3.35 | 0.05 |
| E1 | GPM2 | 3A | AX.89678328 | 5.62E+07 | 0.38 | -639.74  | 3.44 | 0.06 |
| E1 | TKW  | 3A | AX.89515637 | 5.00E+08 | 0.13 | -1.59    | 4.54 | 0.08 |
| E1 | GPM2 | 3A | AX.89775222 | 5.61E+07 | 0.37 | -654.03  | 3.55 | 0.06 |
| E1 | GPM2 | 3A | AX.89462305 | 1.18E+07 | 0.29 | 642.67   | 3.10 | 0.05 |
| E1 | TKW  | 3A | AX.89731837 | 4.79E+08 | 0.34 | -0.89    | 3.12 | 0.06 |
| E1 | TKW  | 3A | AX.89476722 | 4.80E+08 | 0.41 | 0.85     | 3.08 | 0.05 |
| E1 | GPM2 | 3A | AX.89636418 | 5.64E+07 | 0.37 | -654.03  | 3.55 | 0.06 |
| E1 | GPM2 | 3A | AX.89596917 | 5.62E+07 | 0.38 | -639.74  | 3.44 | 0.06 |
| E1 | TKW  | 3A | AX.89596098 | 7.44E+08 | 0.35 | -0.96    | 3.55 | 0.06 |
| E1 | TKW  | 3A | AX.89730621 | 4.80E+08 | 0.41 | 0.85     | 3.07 | 0.05 |
| E1 | TKW  | 3A | AX.89710837 | 5.32E+08 | 0.17 | -1.22    | 3.54 | 0.06 |
| E1 | TKW  | 3A | AX.89385976 | 5.32E+08 | 0.16 | -1.28    | 3.77 | 0.07 |
| E1 | GPM2 | 3A | AX.89549948 | 5.70E+07 | 0.38 | -639.74  | 3.44 | 0.06 |
| E1 | TKW  | 3A | AX.89552376 | 4.86E+08 | 0.16 | -1.24    | 3.48 | 0.06 |
| E1 | TKW  | 3A | AX.89612704 | 4.80E+08 | 0.40 | 0.86     | 3.12 | 0.05 |

|    |      |    |             |          |      |          |      |      |
|----|------|----|-------------|----------|------|----------|------|------|
| E1 | TKW  | 3A | AX.89335343 | 5.65E+08 | 0.15 | -1.15    | 3.03 | 0.05 |
| E1 | GY   | 3A | AX.89559269 | 5.61E+07 | 0.39 | -2.51    | 3.51 | 0.06 |
| E1 | TKW  | 3A | AX.89539595 | 4.79E+08 | 0.34 | -0.89    | 3.12 | 0.06 |
| E1 | GY   | 3A | AX.89536450 | 5.68E+07 | 0.38 | -2.49    | 3.45 | 0.06 |
| E1 | TKW  | 3A | AX.89395544 | 4.86E+08 | 0.16 | -1.24    | 3.48 | 0.06 |
| E1 | TKW  | 3A | AX.89771728 | 7.44E+08 | 0.26 | -0.97    | 3.15 | 0.05 |
| E1 | GY   | 3A | AX.89762173 | 5.71E+07 | 0.38 | -2.49    | 3.45 | 0.06 |
| E1 | TKW  | 3A | AX.89319918 | 5.34E+08 | 0.13 | -1.48    | 4.13 | 0.07 |
| E1 | GPM2 | 3A | AX.89444118 | 4.17E+05 | 0.50 | -606.80  | 3.30 | 0.05 |
| E1 | GY   | 3A | AX.89755885 | 5.64E+07 | 0.38 | -2.49    | 3.45 | 0.06 |
| E1 | TKW  | 3A | AX.89767042 | 5.32E+08 | 0.16 | -1.28    | 3.77 | 0.07 |
| E1 | TKW  | 3A | AX.89702309 | 4.80E+08 | 0.22 | -1.39    | 5.38 | 0.10 |
| E1 | TKW  | 3A | AX.89595384 | 5.32E+08 | 0.17 | -1.17    | 3.29 | 0.06 |
| E1 | GPM2 | 3A | AX.89633282 | 1.31E+06 | 0.36 | -673.59  | 3.68 | 0.06 |
| E1 | TKW  | 3A | AX.89375669 | 4.80E+08 | 0.24 | -1.31    | 5.07 | 0.09 |
| E1 | GY   | 3A | AX.89597151 | 6.60E+08 | 0.24 | 2.83     | 3.41 | 0.06 |
| E1 | TKW  | 3A | AX.89377201 | 5.34E+08 | 0.17 | -1.26    | 3.83 | 0.07 |
| E1 | TKW  | 3A | AX.89664544 | 7.44E+08 | 0.37 | -0.96    | 3.66 | 0.07 |
| E1 | GPM2 | 3A | AX.89514349 | 5.70E+07 | 0.38 | -639.74  | 3.44 | 0.06 |
| E1 | TKW  | 3A | AX.89720844 | 4.94E+08 | 0.14 | -1.28    | 3.44 | 0.06 |
| E1 | GY   | 3A | AX.89684368 | 7.12E+08 | 0.20 | 2.83     | 3.12 | 0.05 |
| E1 | TKW  | 3A | AX.89310434 | 5.32E+08 | 0.16 | -1.28    | 3.77 | 0.07 |
| E1 | TKW  | 3A | AX.89777932 | 5.34E+08 | 0.13 | -1.43    | 3.99 | 0.07 |
| E1 | TKW  | 3A | AX.89775562 | 5.32E+08 | 0.14 | -1.21    | 3.07 | 0.05 |
| E1 | GPM2 | 3A | AX.89618886 | 6.23E+08 | 0.23 | 705.86   | 3.21 | 0.05 |
| E1 | TKW  | 3A | AX.89311054 | 4.80E+08 | 0.22 | -1.39    | 5.38 | 0.10 |
| E1 | TKW  | 3A | AX.89492626 | 7.44E+08 | 0.37 | -0.88    | 3.14 | 0.06 |
| E1 | TKW  | 3A | AX.89511542 | 5.32E+08 | 0.14 | -1.21    | 3.07 | 0.05 |
| E1 | TKW  | 3A | AX.89497520 | 7.44E+08 | 0.35 | -0.96    | 3.55 | 0.06 |
| E1 | TKW  | 3A | AX.89426956 | 5.32E+08 | 0.14 | -1.21    | 3.07 | 0.05 |
| E1 | GPM2 | 3A | AX.89538943 | 7.11E+08 | 0.07 | -1224.61 | 3.65 | 0.06 |
| E1 | TKW  | 3A | AX.89433968 | 4.86E+08 | 0.16 | -1.24    | 3.48 | 0.06 |
| E1 | TKW  | 3A | AX.89346113 | 4.80E+08 | 0.22 | -1.39    | 5.38 | 0.10 |
| E1 | GY   | 3A | AX.89598815 | 5.67E+07 | 0.37 | -2.50    | 3.45 | 0.06 |
| E1 | TKW  | 3A | AX.89595925 | 4.86E+08 | 0.16 | -1.24    | 3.48 | 0.06 |
| E1 | TKW  | 3A | AX.89467371 | 9.85E+06 | 0.26 | 0.96     | 3.07 | 0.05 |
| E1 | TKW  | 3A | AX.89609675 | 5.34E+08 | 0.13 | -1.44    | 3.81 | 0.07 |
| E1 | TKW  | 3A | AX.89669017 | 5.34E+08 | 0.17 | -1.26    | 3.83 | 0.07 |
| E1 | GPM2 | 3A | AX.89657684 | 7.22E+06 | 0.45 | 632.74   | 3.51 | 0.05 |
| E1 | TKW  | 3A | AX.89609294 | 5.32E+08 | 0.14 | -1.21    | 3.07 | 0.05 |
| E1 | GPM2 | 3A | AX.89543954 | 5.70E+07 | 0.38 | -610.85  | 3.18 | 0.05 |
| E1 | GY   | 3A | AX.89701379 | 5.20E+08 | 0.05 | -7.82    | 5.92 | 0.11 |
| E1 | GPM2 | 3A | AX.89579477 | 9.57E+06 | 0.26 | -678.06  | 3.16 | 0.05 |
| E1 | TKW  | 3A | AX.89525277 | 5.32E+08 | 0.17 | -1.22    | 3.54 | 0.06 |
| E1 | TKW  | 3A | AX.89367927 | 5.20E+08 | 0.13 | -1.26    | 3.07 | 0.05 |
| E1 | TKW  | 3A | AX.89634502 | 4.86E+08 | 0.16 | -1.24    | 3.48 | 0.06 |
| E1 | GY   | 3A | AX.89490667 | 5.71E+07 | 0.39 | -2.46    | 3.38 | 0.05 |
| E1 | GPM2 | 3A | AX.89766111 | 5.68E+07 | 0.38 | -639.74  | 3.44 | 0.06 |
| E1 | TKW  | 3A | AX.89439213 | 5.14E+08 | 0.22 | -1.10    | 3.50 | 0.06 |
| E1 | TKW  | 3A | AX.89542835 | 1.88E+06 | 0.25 | 0.97     | 3.09 | 0.05 |

|    |      |    |             |          |      |         |      |      |
|----|------|----|-------------|----------|------|---------|------|------|
| E1 | TKW  | 3A | AX.89447799 | 5.34E+08 | 0.17 | -1.26   | 3.83 | 0.07 |
| E1 | GPM2 | 3A | AX.89762173 | 5.71E+07 | 0.38 | -639.74 | 3.44 | 0.06 |
| E1 | GY   | 3A | AX.89458621 | 5.67E+07 | 0.37 | -2.50   | 3.45 | 0.06 |
| E1 | TKW  | 3A | AX.89702901 | 5.34E+08 | 0.17 | -1.26   | 3.83 | 0.07 |
| E1 | TKW  | 3A | AX.89658848 | 4.80E+08 | 0.25 | -1.23   | 4.67 | 0.08 |
| E1 | TKW  | 3A | AX.89405100 | 4.86E+08 | 0.16 | -1.24   | 3.48 | 0.06 |
| E1 | GPM2 | 3A | AX.89724310 | 1.17E+07 | 0.33 | 652.45  | 3.35 | 0.06 |
| E1 | GPM2 | 3A | AX.89470027 | 5.61E+07 | 0.37 | -654.03 | 3.55 | 0.06 |
| E1 | GPM2 | 3A | AX.89370767 | 1.52E+06 | 0.34 | -626.33 | 3.18 | 0.05 |
| E1 | TKW  | 3A | AX.89768808 | 5.34E+08 | 0.17 | -1.26   | 3.83 | 0.07 |
| E1 | TKW  | 3A | AX.89643406 | 5.22E+08 | 0.13 | -1.26   | 3.07 | 0.05 |
| E1 | TKW  | 3A | AX.89528884 | 4.88E+08 | 0.14 | -1.23   | 3.15 | 0.05 |
| E1 | TKW  | 3A | AX.89737513 | 5.34E+08 | 0.15 | -1.30   | 3.64 | 0.06 |
| E1 | TKW  | 3A | AX.89726992 | 5.32E+08 | 0.17 | -1.22   | 3.54 | 0.06 |
| E1 | TKW  | 3A | AX.89440804 | 4.80E+08 | 0.24 | -1.31   | 5.07 | 0.09 |
| E1 | TKW  | 3A | AX.89441173 | 4.79E+08 | 0.34 | -0.89   | 3.12 | 0.06 |
| E1 | TKW  | 3A | AX.89396866 | 5.32E+08 | 0.15 | -1.36   | 4.02 | 0.07 |
| E1 | GPM2 | 3A | AX.89777576 | 6.25E+08 | 0.24 | 694.77  | 3.16 | 0.05 |
| E1 | GPM2 | 3A | AX.89528765 | 5.67E+07 | 0.37 | -654.03 | 3.55 | 0.06 |
| E1 | GPM2 | 3A | AX.89371568 | 1.03E+06 | 0.34 | -653.40 | 3.44 | 0.05 |
| E1 | TKW  | 3A | AX.89665785 | 4.80E+08 | 0.24 | -1.27   | 4.75 | 0.08 |
| E1 | GPM2 | 3A | AX.89411438 | 5.70E+07 | 0.37 | -654.03 | 3.55 | 0.06 |
| E1 | GPM2 | 3A | AX.89352203 | 4.14E+05 | 0.35 | -657.03 | 3.51 | 0.05 |
| E1 | TKW  | 3A | AX.89328327 | 5.20E+08 | 0.13 | -1.26   | 3.07 | 0.05 |
| E1 | GPM2 | 3A | AX.89581641 | 5.68E+07 | 0.37 | -654.03 | 3.55 | 0.06 |
| E1 | GPM2 | 3A | AX.89637550 | 1.60E+05 | 0.50 | -619.47 | 3.42 | 0.05 |
| E1 | TKW  | 3A | AX.89622363 | 5.34E+08 | 0.17 | -1.26   | 3.83 | 0.07 |
| E1 | TKW  | 3A | AX.89333489 | 4.86E+08 | 0.13 | -1.31   | 3.42 | 0.06 |
| E1 | TKW  | 3A | AX.89680560 | 5.34E+08 | 0.14 | -1.20   | 3.02 | 0.05 |
| E1 | TKW  | 3A | AX.89493328 | 5.34E+08 | 0.17 | -1.26   | 3.83 | 0.07 |
| E1 | TKW  | 3A | AX.89673642 | 5.32E+08 | 0.14 | -1.21   | 3.07 | 0.05 |
| E1 | TKW  | 3A | AX.89454633 | 5.32E+08 | 0.13 | -1.28   | 3.30 | 0.06 |
| E1 | TKW  | 3A | AX.89611849 | 4.80E+08 | 0.22 | -1.39   | 5.38 | 0.10 |
| E1 | TKW  | 3A | AX.89416670 | 5.20E+08 | 0.13 | -1.26   | 3.07 | 0.05 |
| E1 | TKW  | 3A | AX.89757174 | 5.32E+08 | 0.16 | -1.28   | 3.77 | 0.07 |
| E1 | TKW  | 3A | AX.89757523 | 7.44E+08 | 0.27 | -0.94   | 3.05 | 0.05 |
| E1 | TKW  | 3A | AX.89375431 | 4.80E+08 | 0.35 | -0.92   | 3.32 | 0.06 |
| E1 | TKW  | 3A | AX.89636742 | 5.32E+08 | 0.16 | -1.28   | 3.77 | 0.07 |
| E1 | TKW  | 3A | AX.89471498 | 7.24E+08 | 0.22 | -1.10   | 3.52 | 0.06 |
| E1 | GY   | 3A | AX.89616535 | 7.11E+08 | 0.06 | -6.47   | 5.27 | 0.09 |
| E1 | TKW  | 3A | AX.89380817 | 4.87E+08 | 0.17 | -1.15   | 3.21 | 0.05 |
| E1 | TKW  | 3A | AX.89608704 | 4.79E+08 | 0.34 | -0.89   | 3.12 | 0.06 |
| E1 | TKW  | 3A | AX.89394934 | 5.32E+08 | 0.16 | -1.18   | 3.25 | 0.06 |
| E1 | TKW  | 3A | AX.89394935 | 4.86E+08 | 0.16 | -1.24   | 3.48 | 0.06 |
| E1 | TKW  | 3A | AX.89614123 | 4.86E+08 | 0.15 | -1.19   | 3.19 | 0.05 |
| E1 | TKW  | 3A | AX.89513582 | 5.02E+08 | 0.15 | -1.35   | 3.87 | 0.07 |
| E1 | TKW  | 3A | AX.89567282 | 4.79E+08 | 0.27 | -0.94   | 3.05 | 0.05 |
| E1 | TKW  | 3A | AX.89729748 | 5.32E+08 | 0.17 | -1.22   | 3.54 | 0.06 |
| E1 | TKW  | 3A | AX.89575384 | 7.44E+08 | 0.26 | -1.06   | 3.64 | 0.06 |
| E1 | TKW  | 3A | AX.89762599 | 5.17E+08 | 0.17 | -1.12   | 3.07 | 0.05 |



|    |      |    |             |          |      |         |      |      |
|----|------|----|-------------|----------|------|---------|------|------|
| E1 | TKW  | 3A | AX.89474714 | 4.79E+08 | 0.34 | -0.89   | 3.12 | 0.06 |
| E1 | TKW  | 3A | AX.89507009 | 5.32E+08 | 0.17 | -1.22   | 3.54 | 0.06 |
| E1 | TKW  | 3A | AX.89389553 | 4.87E+08 | 0.17 | -1.22   | 3.51 | 0.06 |
| E1 | TKW  | 3A | AX.89747368 | 4.79E+08 | 0.34 | -0.89   | 3.12 | 0.06 |
| E1 | TKW  | 3A | AX.89445760 | 5.32E+08 | 0.16 | -1.28   | 3.77 | 0.07 |
| E1 | TKW  | 3A | AX.89756173 | 5.32E+08 | 0.16 | -1.28   | 3.77 | 0.07 |
| E1 | TKW  | 3A | AX.89461601 | 5.32E+08 | 0.13 | -1.24   | 3.04 | 0.05 |
| E1 | TKW  | 3A | AX.89676298 | 5.32E+08 | 0.14 | -1.21   | 3.07 | 0.05 |
| E1 | TKW  | 3A | AX.89477758 | 5.32E+08 | 0.17 | -1.22   | 3.54 | 0.06 |
| E1 | TKW  | 3A | AX.89315109 | 5.34E+08 | 0.17 | -1.26   | 3.83 | 0.07 |
| E1 | TKW  | 3A | AX.89718581 | 4.80E+08 | 0.40 | 0.86    | 3.12 | 0.05 |
| E1 | TKW  | 3A | AX.89644673 | 5.34E+08 | 0.17 | -1.26   | 3.83 | 0.07 |
| E1 | TKW  | 3A | AX.89750696 | 5.34E+08 | 0.17 | -1.35   | 4.28 | 0.08 |
| E1 | TKW  | 3A | AX.89325426 | 4.80E+08 | 0.24 | -1.31   | 5.07 | 0.09 |
| E1 | TKW  | 3A | AX.89513937 | 4.86E+08 | 0.16 | -1.24   | 3.48 | 0.06 |
| E1 | TKW  | 3A | AX.89686928 | 4.79E+08 | 0.34 | -0.89   | 3.12 | 0.06 |
| E1 | TKW  | 3A | AX.89444920 | 7.44E+08 | 0.27 | -0.95   | 3.07 | 0.05 |
| E1 | TKW  | 3A | AX.89374451 | 5.32E+08 | 0.17 | -1.22   | 3.54 | 0.06 |
| E1 | TKW  | 3A | AX.89584807 | 5.20E+08 | 0.13 | -1.26   | 3.07 | 0.05 |
| E1 | TKW  | 3A | AX.89650073 | 4.87E+08 | 0.13 | -1.25   | 3.18 | 0.05 |
| E1 | TKW  | 3A | AX.89382187 | 5.34E+08 | 0.17 | -1.26   | 3.83 | 0.07 |
| E1 | TKW  | 3A | AX.89691225 | 4.86E+08 | 0.16 | -1.24   | 3.48 | 0.06 |
| E1 | TKW  | 3A | AX.89610052 | 2.23E+08 | 0.26 | 0.96    | 3.06 | 0.05 |
| E1 | TKW  | 3A | AX.89390721 | 4.88E+08 | 0.16 | -1.17   | 3.23 | 0.05 |
| E1 | TKW  | 3A | AX.89716790 | 5.34E+08 | 0.15 | -1.30   | 3.64 | 0.06 |
| E1 | TKW  | 3A | AX.89610689 | 5.32E+08 | 0.17 | -1.22   | 3.54 | 0.06 |
| E1 | TKW  | 3A | AX.89509711 | 5.32E+08 | 0.17 | -1.22   | 3.54 | 0.06 |
| E1 | TKW  | 3A | AX.89603382 | 4.88E+08 | 0.14 | -1.23   | 3.15 | 0.05 |
| E1 | TKW  | 3A | AX.89623712 | 5.32E+08 | 0.13 | -1.28   | 3.30 | 0.06 |
| E1 | GPM2 | 3A | AX.89606467 | 7.27E+06 | 0.37 | -600.16 | 3.06 | 0.04 |
| E1 | TKW  | 3A | AX.89376790 | 5.00E+08 | 0.13 | -1.42   | 3.82 | 0.06 |
| E1 | TKW  | 3A | AX.89709765 | 4.80E+08 | 0.34 | -0.89   | 3.12 | 0.06 |
| E1 | TKW  | 3A | AX.89643606 | 5.32E+08 | 0.10 | -1.43   | 3.14 | 0.05 |
| E1 | TKW  | 3A | AX.89607276 | 5.32E+08 | 0.17 | -1.13   | 3.14 | 0.05 |
| E1 | TKW  | 3A | AX.89668982 | 5.32E+08 | 0.17 | -1.35   | 4.29 | 0.08 |
| E1 | TKW  | 3A | AX.89401719 | 7.24E+08 | 0.22 | -1.10   | 3.52 | 0.06 |
| E1 | TKW  | 3A | AX.89455172 | 5.32E+08 | 0.16 | -1.28   | 3.77 | 0.07 |
| E1 | GPM2 | 3A | AX.89448108 | 1.18E+07 | 0.33 | 652.45  | 3.35 | 0.06 |
| E1 | TKW  | 3A | AX.89362246 | 4.59E+08 | 0.39 | 0.91    | 3.41 | 0.06 |
| E1 | TKW  | 3A | AX.89727232 | 5.34E+08 | 0.17 | -1.26   | 3.83 | 0.07 |
| E1 | TKW  | 3A | AX.89739009 | 4.79E+08 | 0.40 | 0.86    | 3.12 | 0.05 |
| E1 | TKW  | 3A | AX.89347824 | 4.87E+08 | 0.14 | -1.23   | 3.15 | 0.05 |
| E1 | TKW  | 3A | AX.89326650 | 5.27E+08 | 0.17 | -1.21   | 3.48 | 0.06 |
| E1 | GPM2 | 3A | AX.89401377 | 5.67E+07 | 0.37 | -654.03 | 3.55 | 0.06 |
| E1 | TKW  | 3A | AX.89360413 | 4.79E+08 | 0.40 | 0.86    | 3.12 | 0.05 |
| E1 | TKW  | 3A | AX.89512513 | 7.44E+08 | 0.26 | -0.97   | 3.15 | 0.05 |
| E1 | TKW  | 3A | AX.89659664 | 5.34E+08 | 0.17 | -1.26   | 3.83 | 0.07 |
| E1 | TKW  | 3A | AX.89413743 | 4.91E+08 | 0.13 | -1.26   | 3.12 | 0.05 |
| E1 | TKW  | 3A | AX.89523321 | 5.32E+08 | 0.14 | -1.21   | 3.07 | 0.05 |
| E1 | TKW  | 3A | AX.89405913 | 4.80E+08 | 0.44 | 0.87    | 3.26 | 0.06 |

|    |      |    |             |          |      |          |      |      |
|----|------|----|-------------|----------|------|----------|------|------|
| E1 | TKW  | 3A | AX.89445609 | 4.86E+08 | 0.16 | -1.24    | 3.48 | 0.06 |
| E1 | TKW  | 3A | AX.89422142 | 7.24E+08 | 0.22 | -1.10    | 3.52 | 0.06 |
| E1 | TKW  | 3A | AX.89319278 | 7.44E+08 | 0.26 | -0.97    | 3.15 | 0.05 |
| E1 | GPM2 | 3A | AX.89451205 | 7.09E+08 | 0.10 | -1032.15 | 3.48 | 0.06 |
| E1 | TKW  | 3A | AX.89486717 | 5.34E+08 | 0.18 | -1.24    | 3.77 | 0.07 |
| E1 | TKW  | 3A | AX.89777457 | 5.15E+08 | 0.23 | -0.99    | 3.07 | 0.05 |
| E1 | TKW  | 3A | AX.89766135 | 5.32E+08 | 0.16 | -1.28    | 3.77 | 0.07 |
| E1 | TKW  | 3A | AX.89332330 | 5.32E+08 | 0.14 | -1.21    | 3.07 | 0.05 |
| E1 | GPM2 | 3A | AX.89648063 | 7.26E+06 | 0.45 | 670.93   | 3.90 | 0.06 |
| E1 | TKW  | 3A | AX.89749784 | 4.87E+08 | 0.14 | -1.34    | 3.72 | 0.06 |
| E1 | GY   | 3A | AX.89369723 | 6.93E+07 | 0.33 | -2.43    | 3.14 | 0.05 |
| E1 | TKW  | 3A | AX.89557687 | 5.32E+08 | 0.16 | -1.28    | 3.77 | 0.07 |
| E1 | TKW  | 3A | AX.89629822 | 4.44E+08 | 0.38 | -0.87    | 3.13 | 0.05 |
| E1 | TKW  | 3A | AX.89755097 | 4.79E+08 | 0.34 | -0.89    | 3.12 | 0.06 |
| E1 | TKW  | 3A | AX.89699436 | 5.34E+08 | 0.16 | -1.19    | 3.32 | 0.06 |
| E1 | TKW  | 3A | AX.89707628 | 7.44E+08 | 0.27 | -0.94    | 3.05 | 0.05 |
| E1 | TKW  | 3A | AX.89436418 | 4.80E+08 | 0.41 | 0.85     | 3.07 | 0.05 |
| E1 | TKW  | 3A | AX.89654631 | 4.87E+08 | 0.14 | -1.23    | 3.15 | 0.05 |
| E1 | TKW  | 3A | AX.89619570 | 7.44E+08 | 0.38 | -0.92    | 3.38 | 0.06 |
| E1 | GPM2 | 3A | AX.89363577 | 4.16E+05 | 0.35 | -690.21  | 3.80 | 0.06 |
| E1 | TKW  | 3A | AX.89726186 | 4.80E+08 | 0.35 | -0.93    | 3.40 | 0.06 |
| E1 | TKW  | 3A | AX.89343172 | 7.79E+07 | 0.29 | -0.97    | 3.31 | 0.06 |
| E1 | TKW  | 3A | AX.89455128 | 4.75E+08 | 0.38 | 1.01     | 4.00 | 0.07 |
| E1 | TKW  | 3A | AX.89401344 | 4.87E+08 | 0.16 | -1.17    | 3.23 | 0.05 |
| E1 | TKW  | 3A | AX.89508575 | 4.44E+08 | 0.25 | -1.15    | 4.10 | 0.07 |
| E1 | TKW  | 3A | AX.89748517 | 5.34E+08 | 0.13 | -1.48    | 4.13 | 0.07 |
| E1 | TKW  | 3A | AX.89463389 | 5.32E+08 | 0.14 | -1.21    | 3.07 | 0.05 |
| E1 | TKW  | 3A | AX.89464242 | 5.32E+08 | 0.17 | -1.22    | 3.54 | 0.06 |
| E1 | TKW  | 3A | AX.89573974 | 5.34E+08 | 0.17 | -1.26    | 3.83 | 0.07 |
| E1 | TKW  | 3A | AX.89431838 | 7.24E+08 | 0.22 | -1.10    | 3.52 | 0.06 |
| E1 | TKW  | 3A | AX.89519239 | 5.12E+08 | 0.10 | -1.43    | 3.14 | 0.05 |
| E1 | TKW  | 3A | AX.89527266 | 4.87E+08 | 0.16 | -1.17    | 3.23 | 0.05 |
| E1 | TKW  | 3A | AX.89341415 | 5.21E+08 | 0.13 | -1.26    | 3.07 | 0.05 |
| E1 | TKW  | 3A | AX.89325014 | 4.79E+08 | 0.34 | -0.89    | 3.12 | 0.06 |
| E1 | TKW  | 3A | AX.89402327 | 5.20E+08 | 0.13 | -1.26    | 3.07 | 0.05 |
| E1 | TKW  | 3A | AX.89433907 | 4.80E+08 | 0.22 | -1.39    | 5.38 | 0.10 |
| E1 | GY   | 3A | AX.89636418 | 5.64E+07 | 0.37 | -2.50    | 3.45 | 0.06 |
| E1 | TKW  | 3A | AX.89752385 | 4.86E+08 | 0.16 | -1.24    | 3.48 | 0.06 |
| E1 | TKW  | 3A | AX.89445636 | 2.81E+08 | 0.25 | 0.96     | 3.01 | 0.05 |
| E1 | TKW  | 3A | AX.89756096 | 5.32E+08 | 0.16 | -1.28    | 3.77 | 0.07 |
| E1 | GPM2 | 3A | AX.89563227 | 7.10E+08 | 0.07 | -1340.44 | 3.83 | 0.07 |
| E1 | TKW  | 3A | AX.89710971 | 4.86E+08 | 0.16 | -1.24    | 3.48 | 0.06 |
| E1 | GPM2 | 3A | AX.89570766 | 5.67E+07 | 0.37 | -654.03  | 3.55 | 0.06 |
| E1 | TKW  | 3A | AX.89391694 | 5.32E+08 | 0.17 | -1.22    | 3.54 | 0.06 |
| E1 | TKW  | 3A | AX.89715165 | 7.44E+08 | 0.27 | -0.94    | 3.05 | 0.05 |
| E1 | TKW  | 3A | AX.89337779 | 7.44E+08 | 0.35 | -1.00    | 3.81 | 0.07 |
| E1 | GPM2 | 3A | AX.89735763 | 5.67E+07 | 0.37 | -654.03  | 3.55 | 0.06 |
| E1 | TKW  | 3A | AX.89344911 | 4.80E+08 | 0.22 | -1.39    | 5.38 | 0.10 |
| E1 | TKW  | 3A | AX.89436116 | 5.11E+08 | 0.22 | -1.04    | 3.20 | 0.05 |
| E1 | TKW  | 3A | AX.89566122 | 5.32E+08 | 0.16 | -1.28    | 3.77 | 0.07 |

|    |      |    |             |          |      |          |      |      |
|----|------|----|-------------|----------|------|----------|------|------|
| E1 | GPM2 | 3A | AX.89464249 | 4.29E+05 | 0.35 | -709.04  | 4.00 | 0.06 |
| E1 | GPM2 | 3A | AX.89559269 | 5.61E+07 | 0.39 | -595.67  | 3.06 | 0.05 |
| E1 | GPM2 | 3A | AX.89723050 | 5.61E+07 | 0.38 | -639.74  | 3.44 | 0.06 |
| E1 | GPM2 | 3A | AX.89316834 | 5.67E+07 | 0.37 | -654.03  | 3.55 | 0.06 |
| E1 | GPM2 | 3A | AX.89334033 | 5.71E+07 | 0.38 | -639.74  | 3.44 | 0.06 |
| E1 | GPM2 | 3A | AX.89538282 | 5.64E+07 | 0.38 | -639.74  | 3.44 | 0.06 |
| E1 | GPM2 | 3A | AX.89635924 | 5.61E+07 | 0.37 | -654.03  | 3.55 | 0.06 |
| E1 | GPM2 | 3A | AX.89654753 | 1.18E+07 | 0.29 | 642.67   | 3.10 | 0.05 |
| E1 | TKW  | 3A | AX.89374984 | 7.44E+08 | 0.26 | -1.03    | 3.52 | 0.06 |
| E1 | GY   | 3A | AX.89756161 | 5.62E+07 | 0.38 | -2.49    | 3.45 | 0.06 |
| E1 | GPM2 | 3A | AX.89432808 | 5.58E+07 | 0.37 | -654.03  | 3.55 | 0.06 |
| E1 | TKW  | 3A | AX.89622080 | 5.32E+08 | 0.17 | -1.22    | 3.54 | 0.06 |
| E1 | TKW  | 3A | AX.89362477 | 4.86E+08 | 0.16 | -1.24    | 3.48 | 0.06 |
| E1 | TKW  | 3A | AX.89354916 | 4.87E+08 | 0.17 | -1.22    | 3.51 | 0.06 |
| E1 | TKW  | 3A | AX.89723710 | 5.32E+08 | 0.16 | -1.28    | 3.77 | 0.07 |
| E1 | TKW  | 3A | AX.89608966 | 5.34E+08 | 0.17 | -1.26    | 3.83 | 0.07 |
| E1 | TKW  | 3A | AX.89364280 | 4.80E+08 | 0.22 | -1.39    | 5.38 | 0.10 |
| E1 | TKW  | 3A | AX.89733534 | 4.80E+08 | 0.22 | -1.39    | 5.38 | 0.10 |
| E1 | GPM2 | 3A | AX.89512498 | 5.68E+07 | 0.37 | -654.03  | 3.55 | 0.06 |
| E1 | TKW  | 3A | AX.89323186 | 4.80E+08 | 0.40 | 0.86     | 3.12 | 0.05 |
| E1 | TKW  | 3A | AX.89521685 | 5.32E+08 | 0.17 | -1.22    | 3.54 | 0.06 |
| E1 | TKW  | 3A | AX.89613546 | 4.09E+08 | 0.26 | 0.96     | 3.06 | 0.05 |
| E1 | TKW  | 3A | AX.89382610 | 7.44E+08 | 0.38 | -0.92    | 3.38 | 0.06 |
| E1 | TKW  | 3A | AX.89697964 | 5.32E+08 | 0.10 | -1.43    | 3.14 | 0.05 |
| E1 | GPM2 | 3A | AX.89735030 | 1.31E+06 | 0.35 | -668.20  | 3.61 | 0.05 |
| E1 | TKW  | 3A | AX.89537624 | 4.79E+08 | 0.34 | -0.89    | 3.12 | 0.06 |
| E1 | TKW  | 3A | AX.89746328 | 5.34E+08 | 0.15 | -1.30    | 3.64 | 0.06 |
| E1 | TKW  | 3A | AX.89674401 | 4.80E+08 | 0.41 | 0.85     | 3.07 | 0.05 |
| E1 | TKW  | 3A | AX.89556300 | 5.34E+08 | 0.13 | -1.48    | 4.13 | 0.07 |
| E1 | GPM2 | 3A | AX.89461796 | 5.57E+08 | 0.05 | -1485.41 | 3.48 | 0.06 |
| E1 | TKW  | 3A | AX.89494558 | 7.44E+08 | 0.36 | -0.96    | 3.60 | 0.06 |
| E1 | TKW  | 3A | AX.89543058 | 7.24E+08 | 0.22 | -1.10    | 3.52 | 0.06 |
| E1 | TKW  | 3A | AX.89319910 | 5.22E+08 | 0.13 | -1.26    | 3.07 | 0.05 |
| E1 | TKW  | 3A | AX.89751607 | 4.79E+08 | 0.34 | -0.94    | 3.44 | 0.06 |
| E1 | TKW  | 3A | AX.89561000 | 5.32E+08 | 0.16 | -1.28    | 3.77 | 0.07 |
| E1 | GPM2 | 3A | AX.89775578 | 5.61E+07 | 0.38 | -639.74  | 3.44 | 0.06 |
| E1 | TKW  | 3A | AX.89452513 | 5.17E+08 | 0.13 | -1.26    | 3.07 | 0.05 |
| E1 | GPM2 | 3A | AX.89369804 | 5.57E+07 | 0.37 | -654.03  | 3.55 | 0.06 |
| E1 | TKW  | 3A | AX.89765605 | 5.34E+08 | 0.17 | -1.26    | 3.83 | 0.07 |
| E1 | TKW  | 3A | AX.89648650 | 5.32E+08 | 0.15 | -1.19    | 3.18 | 0.05 |
| E1 | TKW  | 3A | AX.89533025 | 5.32E+08 | 0.16 | -1.28    | 3.77 | 0.07 |
| E1 | TKW  | 3A | AX.89749568 | 7.24E+08 | 0.22 | -1.10    | 3.52 | 0.06 |
| E1 | GPM2 | 3A | AX.89742109 | 5.67E+07 | 0.37 | -654.03  | 3.55 | 0.06 |
| E1 | GPM2 | 3A | AX.89764338 | 1.27E+06 | 0.34 | -653.40  | 3.44 | 0.05 |
| E1 | TKW  | 3A | AX.89322549 | 4.80E+08 | 0.34 | -0.89    | 3.12 | 0.06 |
| E1 | GPM2 | 3A | AX.89534837 | 5.70E+07 | 0.38 | -639.74  | 3.44 | 0.06 |
| E1 | TKW  | 3A | AX.89590832 | 4.57E+08 | 0.42 | 0.86     | 3.14 | 0.05 |
| E1 | TKW  | 3A | AX.89371956 | 5.32E+08 | 0.16 | -1.23    | 3.47 | 0.06 |
| E1 | TKW  | 3A | AX.89460722 | 5.32E+08 | 0.17 | -1.22    | 3.54 | 0.06 |
| E1 | TKW  | 3A | AX.89498138 | 4.32E+08 | 0.22 | -1.04    | 3.26 | 0.06 |

|    |      |    |             |          |      |         |      |      |
|----|------|----|-------------|----------|------|---------|------|------|
| E1 | GPM2 | 3A | AX.89311273 | 1.42E+05 | 0.34 | -653.40 | 3.44 | 0.05 |
| E1 | TKW  | 3A | AX.89313940 | 5.32E+08 | 0.17 | -1.22   | 3.54 | 0.06 |
| E1 | TKW  | 3A | AX.89746144 | 5.15E+08 | 0.23 | -0.99   | 3.07 | 0.05 |
| E1 | TKW  | 3A | AX.89469040 | 7.44E+08 | 0.36 | -0.93   | 3.39 | 0.06 |
| E1 | TKW  | 3A | AX.89401394 | 5.34E+08 | 0.17 | -1.26   | 3.83 | 0.07 |
| E1 | TKW  | 3A | AX.89441206 | 4.80E+08 | 0.24 | -1.31   | 5.07 | 0.09 |
| E1 | TKW  | 3A | AX.89489359 | 5.32E+08 | 0.15 | -1.18   | 3.07 | 0.05 |
| E1 | TKW  | 3A | AX.89311196 | 7.44E+08 | 0.27 | -0.94   | 3.05 | 0.05 |
| E1 | TKW  | 3A | AX.89420035 | 5.37E+08 | 0.13 | -1.25   | 3.17 | 0.05 |
| E1 | TKW  | 3A | AX.89500738 | 4.79E+08 | 0.34 | -0.89   | 3.12 | 0.06 |
| E1 | TKW  | 3A | AX.89437419 | 5.34E+08 | 0.12 | -1.39   | 3.39 | 0.06 |
| E1 | TKW  | 3A | AX.89748002 | 5.32E+08 | 0.16 | -1.28   | 3.77 | 0.07 |
| E1 | TKW  | 3A | AX.89755805 | 7.21E+06 | 0.40 | 0.86    | 3.11 | 0.05 |
| E1 | TKW  | 3A | AX.89352479 | 4.80E+08 | 0.41 | 0.87    | 3.19 | 0.06 |
| E1 | TKW  | 3A | AX.89383923 | 5.17E+08 | 0.13 | -1.26   | 3.07 | 0.05 |
| E1 | TKW  | 3A | AX.89766488 | 4.79E+08 | 0.34 | -0.89   | 3.12 | 0.06 |
| E1 | TKW  | 3A | AX.89470090 | 4.70E+08 | 0.19 | -1.10   | 3.18 | 0.05 |
| E1 | TKW  | 3A | AX.89619996 | 4.79E+08 | 0.34 | -0.89   | 3.12 | 0.06 |
| E1 | TKW  | 3A | AX.89342059 | 5.32E+08 | 0.17 | -1.22   | 3.54 | 0.06 |
| E1 | TKW  | 3A | AX.89347510 | 5.34E+08 | 0.13 | -1.33   | 3.35 | 0.06 |
| E1 | TKW  | 3A | AX.89655083 | 2.12E+08 | 0.26 | 0.96    | 3.06 | 0.05 |
| E1 | TKW  | 3A | AX.89600269 | 5.32E+08 | 0.14 | -1.21   | 3.07 | 0.05 |
| E1 | TKW  | 3A | AX.89632422 | 7.44E+08 | 0.26 | -0.97   | 3.15 | 0.05 |
| E1 | TKW  | 3A | AX.89674577 | 5.32E+08 | 0.16 | -1.23   | 3.45 | 0.06 |
| E1 | TKW  | 3A | AX.89724486 | 5.32E+08 | 0.17 | -1.22   | 3.54 | 0.06 |
| E1 | TKW  | 3A | AX.89643254 | 5.34E+08 | 0.17 | -1.26   | 3.83 | 0.07 |
| E1 | TKW  | 3A | AX.89519171 | 4.87E+08 | 0.16 | -1.17   | 3.23 | 0.05 |
| E1 | TKW  | 3A | AX.89385871 | 4.86E+08 | 0.15 | -1.19   | 3.19 | 0.05 |
| E1 | TKW  | 3A | AX.89380739 | 4.80E+08 | 0.22 | -1.39   | 5.38 | 0.10 |
| E1 | TKW  | 3A | AX.89661792 | 7.24E+08 | 0.22 | -1.05   | 3.27 | 0.05 |
| E1 | TKW  | 3A | AX.89686826 | 5.34E+08 | 0.13 | -1.58   | 4.65 | 0.08 |
| E1 | TKW  | 3A | AX.89463665 | 5.32E+08 | 0.16 | -1.28   | 3.77 | 0.07 |
| E1 | TKW  | 3A | AX.89729990 | 4.79E+08 | 0.34 | -0.89   | 3.12 | 0.06 |
| E1 | TKW  | 3A | AX.89354980 | 4.79E+08 | 0.34 | -0.89   | 3.12 | 0.06 |
| E1 | GPM2 | 3A | AX.89436052 | 5.70E+07 | 0.38 | -639.74 | 3.44 | 0.06 |
| E1 | TKW  | 3A | AX.89724119 | 4.86E+08 | 0.16 | -1.24   | 3.48 | 0.06 |
| E1 | TKW  | 3A | AX.89580115 | 4.50E+08 | 0.24 | -1.11   | 3.81 | 0.07 |
| E1 | TKW  | 3A | AX.89371414 | 4.36E+08 | 0.23 | -1.09   | 3.53 | 0.06 |
| E1 | TKW  | 3A | AX.89501453 | 5.32E+08 | 0.14 | -1.21   | 3.07 | 0.05 |
| E1 | TKW  | 3A | AX.89440050 | 5.32E+08 | 0.16 | -1.34   | 4.00 | 0.07 |
| E1 | GPM2 | 3A | AX.89312843 | 5.67E+07 | 0.38 | -639.74 | 3.44 | 0.06 |
| E1 | TKW  | 3A | AX.89696268 | 4.87E+08 | 0.16 | -1.17   | 3.23 | 0.05 |
| E1 | TKW  | 3A | AX.89771993 | 5.34E+08 | 0.14 | -1.47   | 4.41 | 0.08 |
| E1 | TKW  | 3A | AX.89350488 | 5.62E+08 | 0.17 | -1.31   | 3.98 | 0.07 |
| E1 | TKW  | 3A | AX.89572200 | 4.80E+08 | 0.24 | -1.37   | 5.52 | 0.10 |
| E1 | TKW  | 3A | AX.89474315 | 4.45E+08 | 0.38 | -0.87   | 3.13 | 0.05 |
| E1 | TKW  | 3A | AX.89568617 | 5.18E+08 | 0.13 | -1.26   | 3.07 | 0.05 |
| E1 | TKW  | 3A | AX.89668013 | 5.20E+08 | 0.13 | -1.26   | 3.07 | 0.05 |
| E1 | TKW  | 3A | AX.89510213 | 5.32E+08 | 0.14 | -1.21   | 3.07 | 0.05 |
| E1 | TKW  | 3A | AX.89523370 | 5.32E+08 | 0.17 | -1.22   | 3.54 | 0.06 |

|    |      |    |             |          |      |        |      |      |
|----|------|----|-------------|----------|------|--------|------|------|
| E1 | TKW  | 3A | AX.89768859 | 4.87E+08 | 0.16 | -1.24  | 3.48 | 0.06 |
| E1 | TKW  | 3A | AX.89705426 | 5.34E+08 | 0.17 | -1.26  | 3.83 | 0.07 |
| E1 | TKW  | 3A | AX.89607450 | 4.79E+08 | 0.40 | 0.86   | 3.12 | 0.05 |
| E2 | GY   | 3A | AX.89445873 | 5.57E+08 | 0.05 | -5.57  | 4.47 | 0.09 |
| E2 | GY   | 3A | AX.89445873 | 5.57E+08 | 0.05 | -5.57  | 4.47 | 0.09 |
| E2 | GY   | 3A | AX.89411739 | 5.60E+08 | 0.07 | -4.26  | 3.69 | 0.07 |
| E2 | GY   | 3A | AX.89329184 | 5.30E+08 | 0.07 | -4.26  | 3.69 | 0.07 |
| E2 | GY   | 3A | AX.89329184 | 5.30E+08 | 0.07 | -4.26  | 3.69 | 0.07 |
| E2 | SPM2 | 3A | AX.89642254 | 7.10E+08 | 0.20 | -15.60 | 3.42 | 0.05 |
| E2 | GY   | 3A | AX.89329561 | 5.61E+08 | 0.07 | -4.26  | 3.69 | 0.07 |
| E2 | SPM2 | 3A | AX.89652812 | 7.10E+08 | 0.22 | -13.99 | 3.04 | 0.05 |
| E2 | SPM2 | 3A | AX.89506953 | 7.10E+08 | 0.22 | -13.99 | 3.04 | 0.05 |
| E2 | GY   | 3A | AX.89505764 | 5.30E+08 | 0.07 | -4.26  | 3.69 | 0.07 |
| E2 | GY   | 3A | AX.89435911 | 5.59E+08 | 0.07 | -4.26  | 3.69 | 0.07 |
| E2 | GY   | 3A | AX.89588092 | 5.57E+08 | 0.07 | -4.26  | 3.69 | 0.07 |
| E2 | SPM2 | 3A | AX.89498752 | 7.10E+08 | 0.22 | -13.99 | 3.04 | 0.05 |
| E2 | GY   | 3A | AX.89611948 | 5.33E+08 | 0.07 | -4.04  | 3.76 | 0.08 |
| E2 | SPM2 | 3A | AX.89541316 | 7.09E+08 | 0.22 | -13.99 | 3.04 | 0.05 |
| E2 | SPM2 | 3A | AX.89724076 | 7.19E+08 | 0.46 | -13.57 | 3.93 | 0.06 |
| E2 | SPM2 | 3A | AX.89451569 | 7.10E+08 | 0.22 | -13.99 | 3.04 | 0.05 |
| E2 | SPM2 | 3A | AX.89438257 | 7.09E+08 | 0.22 | -13.99 | 3.04 | 0.05 |
| E2 | SPM2 | 3A | AX.89518967 | 7.19E+08 | 0.49 | 11.57  | 3.01 | 0.04 |
| E2 | GY   | 3A | AX.89437126 | 5.58E+08 | 0.07 | -4.26  | 3.69 | 0.07 |
| E2 | SPM2 | 3A | AX.89496561 | 7.10E+08 | 0.22 | -13.99 | 3.04 | 0.05 |
| E2 | SPM2 | 3A | AX.89449835 | 7.09E+08 | 0.22 | -13.99 | 3.04 | 0.05 |
| E2 | GY   | 3A | AX.89723908 | 5.59E+08 | 0.07 | -4.26  | 3.69 | 0.07 |
| E2 | GY   | 3A | AX.89723908 | 5.59E+08 | 0.07 | -4.26  | 3.69 | 0.07 |
| E2 | GY   | 3A | AX.89366811 | 5.61E+08 | 0.07 | -4.26  | 3.69 | 0.07 |
| E2 | GY   | 3A | AX.89366811 | 5.61E+08 | 0.07 | -4.26  | 3.69 | 0.07 |
| E2 | SPM2 | 3A | AX.89467391 | 7.19E+08 | 0.46 | -13.57 | 3.93 | 0.06 |
| E2 | GY   | 3A | AX.89613280 | 5.59E+08 | 0.07 | -4.26  | 3.69 | 0.07 |
| E2 | GY   | 3A | AX.89496237 | 5.65E+08 | 0.07 | -4.26  | 3.69 | 0.07 |
| E2 | GY   | 3A | AX.89496237 | 5.65E+08 | 0.07 | -4.26  | 3.69 | 0.07 |
| E2 | SPM2 | 3A | AX.89679882 | 7.10E+08 | 0.22 | -13.99 | 3.04 | 0.05 |
| E2 | SPM2 | 3A | AX.89551880 | 7.10E+08 | 0.22 | -13.99 | 3.04 | 0.05 |
| E2 | GY   | 3A | AX.89748200 | 5.66E+08 | 0.07 | -4.26  | 3.69 | 0.07 |
| E2 | SPM2 | 3A | AX.89413336 | 7.09E+08 | 0.22 | -13.99 | 3.04 | 0.05 |
| E2 | GY   | 3A | AX.89626071 | 5.57E+08 | 0.06 | -4.59  | 3.95 | 0.08 |
| E2 | GY   | 3A | AX.89460831 | 5.29E+08 | 0.07 | -4.26  | 3.69 | 0.07 |
| E2 | GY   | 3A | AX.89554912 | 5.66E+08 | 0.07 | -4.26  | 3.69 | 0.07 |
| E2 | GY   | 3A | AX.89473126 | 5.62E+08 | 0.07 | -4.26  | 3.69 | 0.07 |
| E2 | GY   | 3A | AX.89473126 | 5.62E+08 | 0.07 | -4.26  | 3.69 | 0.07 |
| E2 | GY   | 3A | AX.89497356 | 5.60E+08 | 0.07 | -4.26  | 3.69 | 0.07 |
| E2 | SPM2 | 3A | AX.89348508 | 7.09E+08 | 0.22 | -13.99 | 3.04 | 0.05 |
| E2 | SPM2 | 3A | AX.89468424 | 7.10E+08 | 0.22 | -13.99 | 3.04 | 0.05 |
| E2 | SPM2 | 3A | AX.86161945 | 7.19E+08 | 0.46 | -13.57 | 3.93 | 0.06 |
| E2 | SPM2 | 3A | AX.89322147 | 7.09E+08 | 0.22 | -13.99 | 3.04 | 0.05 |
| E2 | GY   | 3A | AX.89567808 | 5.58E+08 | 0.07 | -4.26  | 3.69 | 0.07 |
| E2 | SPM2 | 3A | AX.89349777 | 7.09E+08 | 0.22 | -13.99 | 3.04 | 0.05 |
| E2 | GY   | 3A | AX.89540978 | 5.44E+08 | 0.05 | -5.07  | 3.72 | 0.07 |

|    |      |    |             |          |      |         |      |      |
|----|------|----|-------------|----------|------|---------|------|------|
| E2 | GY   | 3A | AX.89689217 | 5.33E+08 | 0.07 | -4.26   | 3.69 | 0.07 |
| E2 | GY   | 3A | AX.89689217 | 5.33E+08 | 0.07 | -4.26   | 3.69 | 0.07 |
| E2 | SPM2 | 3A | AX.89423665 | 7.10E+08 | 0.22 | -13.99  | 3.04 | 0.05 |
| E2 | SPM2 | 3A | AX.89426872 | 7.09E+08 | 0.22 | -13.99  | 3.04 | 0.05 |
| E2 | SPM2 | 3A | AX.89571934 | 7.09E+08 | 0.22 | -13.99  | 3.04 | 0.05 |
| E2 | GY   | 3A | AX.89487853 | 5.57E+08 | 0.07 | -4.26   | 3.69 | 0.07 |
| E2 | SPM2 | 3A | AX.86166408 | 7.19E+08 | 0.46 | -13.57  | 3.93 | 0.06 |
| E2 | SPM2 | 3A | AX.89726913 | 7.19E+08 | 0.48 | -11.87  | 3.13 | 0.05 |
| E2 | GY   | 3A | AX.89545138 | 5.57E+08 | 0.07 | -4.26   | 3.69 | 0.07 |
| E2 | SPM2 | 3A | AX.89474225 | 7.10E+08 | 0.22 | -13.99  | 3.04 | 0.05 |
| E2 | GY   | 3A | AX.89405683 | 5.60E+08 | 0.07 | -4.26   | 3.69 | 0.07 |
| E2 | GY   | 3A | AX.89358066 | 5.33E+08 | 0.07 | -4.04   | 3.76 | 0.08 |
| E2 | GY   | 3A | AX.89334785 | 5.64E+08 | 0.07 | -4.26   | 3.69 | 0.07 |
| E2 | TKW  | 3A | AX.89414009 | 7.44E+08 | 0.30 | -1.05   | 3.37 | 0.06 |
| E2 | SPM2 | 3A | AX.89651667 | 7.10E+08 | 0.21 | -14.58  | 3.18 | 0.05 |
| E2 | SPM2 | 3A | AX.89379903 | 7.09E+08 | 0.22 | -13.99  | 3.04 | 0.05 |
| E2 | SPM2 | 3A | AX.89690507 | 7.10E+08 | 0.22 | -13.99  | 3.04 | 0.05 |
| E2 | SPM2 | 3A | AX.89499565 | 7.10E+08 | 0.23 | -13.71  | 3.01 | 0.04 |
| E2 | GY   | 3A | AX.89407423 | 5.38E+07 | 0.07 | -4.67   | 4.21 | 0.08 |
| E2 | SPM2 | 3A | AX.89470130 | 7.09E+08 | 0.22 | -13.99  | 3.04 | 0.05 |
| E2 | SPM2 | 3A | AX.89659165 | 1.95E+07 | 0.19 | 19.73   | 4.92 | 0.09 |
| E2 | SPM2 | 3A | AX.89643343 | 7.10E+08 | 0.23 | -13.71  | 3.01 | 0.04 |
| E2 | SPM2 | 3A | AX.89323561 | 7.10E+08 | 0.22 | -13.99  | 3.04 | 0.05 |
| E2 | GY   | 3A | AX.89477075 | 5.57E+08 | 0.08 | -3.80   | 3.51 | 0.07 |
| E2 | SPM2 | 3A | AX.89382217 | 7.10E+08 | 0.22 | -13.99  | 3.04 | 0.05 |
| E2 | GY   | 3A | AX.89606047 | 5.30E+08 | 0.07 | -4.26   | 3.69 | 0.07 |
| E2 | GY   | 3A | AX.89675998 | 5.30E+08 | 0.06 | -4.70   | 4.13 | 0.08 |
| E2 | GY   | 3A | AX.89408054 | 5.62E+08 | 0.07 | -4.26   | 3.69 | 0.07 |
| E2 | GY   | 3A | AX.89618721 | 5.57E+08 | 0.07 | -4.26   | 3.69 | 0.07 |
| E2 | GY   | 3A | AX.89618721 | 5.57E+08 | 0.07 | -4.26   | 3.69 | 0.07 |
| E2 | GY   | 3A | AX.89395845 | 5.57E+08 | 0.07 | -4.26   | 3.69 | 0.07 |
| E2 | GY   | 3A | AX.89395845 | 5.57E+08 | 0.07 | -4.26   | 3.69 | 0.07 |
| E2 | SPM2 | 3A | AX.89641664 | 7.10E+08 | 0.22 | -13.99  | 3.04 | 0.05 |
| E2 | SPM2 | 3A | AX.89471074 | 7.19E+08 | 0.46 | -13.57  | 3.93 | 0.06 |
| E2 | GY   | 3A | AX.89337100 | 5.65E+08 | 0.07 | -4.26   | 3.69 | 0.07 |
| E2 | SPM2 | 3A | AX.89609794 | 7.09E+08 | 0.22 | -13.99  | 3.04 | 0.05 |
| E2 | GY   | 3A | AX.89408696 | 5.64E+08 | 0.07 | -4.26   | 3.69 | 0.07 |
| E2 | GY   | 3A | AX.89408696 | 5.64E+08 | 0.07 | -4.26   | 3.69 | 0.07 |
| E2 | GPM2 | 3A | AX.89453948 | 7.49E+08 | 0.08 | -855.62 | 3.04 | 0.04 |
| E2 | GY   | 3A | AX.89734012 | 5.64E+08 | 0.06 | -5.01   | 4.31 | 0.08 |
| E2 | GY   | 3A | AX.89734012 | 5.64E+08 | 0.06 | -5.01   | 4.31 | 0.08 |
| E2 | GY   | 3A | AX.89373419 | 5.60E+08 | 0.07 | -4.26   | 3.69 | 0.07 |
| E2 | GY   | 3A | AX.89373419 | 5.60E+08 | 0.07 | -4.26   | 3.69 | 0.07 |
| E2 | SPM2 | 3A | AX.89699770 | 7.10E+08 | 0.22 | -13.99  | 3.04 | 0.05 |
| E2 | SPM2 | 3A | AX.89413279 | 7.19E+08 | 0.46 | -13.57  | 3.93 | 0.06 |
| E2 | SPM2 | 3A | AX.89658539 | 7.10E+08 | 0.22 | -13.99  | 3.04 | 0.05 |
| E2 | GY   | 3A | AX.89397281 | 5.30E+08 | 0.07 | -4.26   | 3.69 | 0.07 |
| E2 | GY   | 3A | AX.89397281 | 5.30E+08 | 0.07 | -4.26   | 3.69 | 0.07 |
| E2 | GY   | 3A | AX.89338270 | 5.34E+08 | 0.07 | -4.04   | 3.76 | 0.08 |
| E2 | SPM2 | 3A | AX.89773608 | 7.09E+08 | 0.22 | -13.99  | 3.04 | 0.05 |

|    |      |    |             |          |      |        |      |      |
|----|------|----|-------------|----------|------|--------|------|------|
| E2 | GY   | 3A | AX.89681123 | 5.62E+08 | 0.07 | -4.26  | 3.69 | 0.07 |
| E2 | SPM2 | 3A | AX.89324207 | 7.10E+08 | 0.22 | -13.99 | 3.04 | 0.05 |
| E2 | GY   | 3A | AX.89410241 | 5.01E+08 | 0.06 | -4.16  | 3.31 | 0.07 |
| E2 | SPM2 | 3A | AX.89643823 | 7.10E+08 | 0.22 | -13.99 | 3.04 | 0.05 |
| E2 | SPM2 | 3A | AX.89621689 | 7.10E+08 | 0.22 | -13.99 | 3.04 | 0.05 |
| E2 | SPM2 | 3A | AX.89670211 | 7.09E+08 | 0.22 | -13.99 | 3.04 | 0.05 |
| E2 | SPM2 | 3A | AX.89550259 | 7.09E+08 | 0.22 | -13.99 | 3.04 | 0.05 |
| E2 | SPM2 | 3A | AX.89423989 | 5.72E+08 | 0.22 | 15.12  | 3.43 | 0.06 |
| E2 | GY   | 3A | AX.89626214 | 5.58E+08 | 0.07 | -4.26  | 3.69 | 0.07 |
| E2 | SPM2 | 3A | AX.89770711 | 7.10E+08 | 0.22 | -13.99 | 3.04 | 0.05 |
| E2 | SPM2 | 3A | AX.89762555 | 7.19E+08 | 0.46 | -13.57 | 3.93 | 0.06 |
| E2 | GY   | 3A | AX.89658263 | 5.56E+08 | 0.10 | -3.36  | 3.49 | 0.07 |
| E2 | GY   | 3A | AX.89658263 | 5.56E+08 | 0.10 | -3.36  | 3.49 | 0.07 |
| E2 | SPM2 | 3A | AX.89632316 | 7.09E+08 | 0.22 | -13.99 | 3.04 | 0.05 |
| E2 | GY   | 3A | AX.89695735 | 5.56E+08 | 0.10 | -3.36  | 3.49 | 0.07 |
| E2 | GY   | 3A | AX.89411123 | 5.59E+08 | 0.07 | -4.26  | 3.69 | 0.07 |
| E2 | SPM2 | 3A | AX.89657455 | 7.09E+08 | 0.22 | -13.99 | 3.04 | 0.05 |
| E2 | GY   | 3A | AX.89542448 | 5.30E+08 | 0.07 | -4.26  | 3.69 | 0.07 |
| E2 | GY   | 3A | AX.89598565 | 5.64E+08 | 0.07 | -4.15  | 3.71 | 0.07 |
| E2 | GY   | 3A | AX.89573549 | 5.30E+08 | 0.07 | -4.26  | 3.69 | 0.07 |
| E2 | GY   | 3A | AX.89573549 | 5.30E+08 | 0.07 | -4.26  | 3.69 | 0.07 |
| E2 | GY   | 3A | AX.89658666 | 5.63E+08 | 0.07 | -4.26  | 3.69 | 0.07 |
| E2 | GY   | 3A | AX.89658666 | 5.63E+08 | 0.07 | -4.26  | 3.69 | 0.07 |
| E2 | GY   | 3A | AX.89411739 | 5.60E+08 | 0.07 | -4.26  | 3.69 | 0.07 |
| E2 | GY   | 3A | AX.89468877 | 5.31E+08 | 0.07 | -4.26  | 3.69 | 0.07 |
| E2 | GY   | 3A | AX.89468877 | 5.31E+08 | 0.07 | -4.26  | 3.69 | 0.07 |
| E2 | GY   | 3A | AX.89412117 | 5.16E+08 | 0.05 | -4.80  | 3.69 | 0.08 |
| E2 | GY   | 3A | AX.89412117 | 5.16E+08 | 0.05 | -4.80  | 3.69 | 0.08 |
| E2 | GY   | 3A | AX.89468967 | 5.30E+08 | 0.07 | -4.26  | 3.69 | 0.07 |
| E2 | GY   | 3A | AX.89468967 | 5.30E+08 | 0.07 | -4.26  | 3.69 | 0.07 |
| E2 | GY   | 3A | AX.89412292 | 5.57E+08 | 0.07 | -4.26  | 3.69 | 0.07 |
| E2 | GY   | 3A | AX.89412292 | 5.57E+08 | 0.07 | -4.26  | 3.69 | 0.07 |
| E2 | GY   | 3A | AX.89745272 | 5.57E+08 | 0.07 | -4.42  | 3.94 | 0.08 |
| E2 | GY   | 3A | AX.89745272 | 5.57E+08 | 0.07 | -4.42  | 3.94 | 0.08 |
| E2 | GY   | 3A | AX.89505764 | 5.30E+08 | 0.07 | -4.26  | 3.69 | 0.07 |
| E2 | GY   | 3A | AX.89673110 | 5.63E+08 | 0.07 | -4.26  | 3.69 | 0.07 |
| E2 | GY   | 3A | AX.89673110 | 5.63E+08 | 0.07 | -4.26  | 3.69 | 0.07 |
| E2 | GY   | 3A | AX.89660420 | 5.66E+08 | 0.07 | -4.26  | 3.69 | 0.07 |
| E2 | GY   | 3A | AX.89660420 | 5.66E+08 | 0.07 | -4.26  | 3.69 | 0.07 |
| E2 | GY   | 3A | AX.89401576 | 5.57E+08 | 0.06 | -4.59  | 3.95 | 0.08 |
| E2 | GY   | 3A | AX.89401576 | 5.57E+08 | 0.06 | -4.59  | 3.95 | 0.08 |
| E2 | GY   | 3A | AX.89722884 | 5.64E+08 | 0.07 | -4.15  | 3.71 | 0.07 |
| E2 | GY   | 3A | AX.89722884 | 5.64E+08 | 0.07 | -4.15  | 3.71 | 0.07 |
| E2 | GY   | 3A | AX.89673581 | 5.33E+08 | 0.07 | -4.04  | 3.76 | 0.08 |
| E2 | GY   | 3A | AX.89601402 | 5.65E+08 | 0.07 | -4.26  | 3.69 | 0.07 |
| E2 | GY   | 3A | AX.89601402 | 5.65E+08 | 0.07 | -4.26  | 3.69 | 0.07 |
| E2 | GY   | 3A | AX.89601456 | 5.32E+08 | 0.07 | -4.26  | 3.69 | 0.07 |
| E2 | GY   | 3A | AX.89726743 | 5.29E+08 | 0.07 | -4.26  | 3.69 | 0.07 |
| E2 | GPS  | 3A | AX.89319922 | 6.13E+08 | 0.10 | -2.36  | 3.51 | 0.07 |
| E2 | GY   | 3A | AX.89449189 | 5.64E+08 | 0.07 | -4.26  | 3.69 | 0.07 |

|    |      |    |             |          |      |         |      |      |
|----|------|----|-------------|----------|------|---------|------|------|
| E2 | GY   | 3A | AX.89449189 | 5.64E+08 | 0.07 | -4.26   | 3.69 | 0.07 |
| E2 | GY   | 3A | AX.89553815 | 4.98E+08 | 0.06 | -4.16   | 3.31 | 0.07 |
| E2 | GY   | 3A | AX.89553815 | 4.98E+08 | 0.06 | -4.16   | 3.31 | 0.07 |
| E2 | GPM2 | 3A | AX.89502795 | 7.49E+08 | 0.08 | -855.62 | 3.04 | 0.04 |
| E2 | GY   | 3A | AX.89734924 | 5.64E+08 | 0.07 | -4.26   | 3.69 | 0.07 |
| E2 | GY   | 3A | AX.89734924 | 5.64E+08 | 0.07 | -4.26   | 3.69 | 0.07 |
| E2 | GY   | 3A | AX.89460523 | 5.60E+08 | 0.07 | -4.26   | 3.69 | 0.07 |
| E2 | GY   | 3A | AX.89590750 | 5.63E+08 | 0.07 | -4.15   | 3.71 | 0.07 |
| E2 | GY   | 3A | AX.89590750 | 5.63E+08 | 0.07 | -4.15   | 3.71 | 0.07 |
| E2 | GY   | 3A | AX.89520771 | 5.30E+08 | 0.07 | -4.26   | 3.69 | 0.07 |
| E2 | GY   | 3A | AX.89520771 | 5.30E+08 | 0.07 | -4.26   | 3.69 | 0.07 |
| E2 | GY   | 3A | AX.89543190 | 5.66E+08 | 0.07 | -4.26   | 3.69 | 0.07 |
| E2 | GY   | 3A | AX.89543190 | 5.66E+08 | 0.07 | -4.26   | 3.69 | 0.07 |
| E2 | GY   | 3A | AX.89543199 | 5.06E+08 | 0.06 | -4.37   | 3.37 | 0.07 |
| E2 | GY   | 3A | AX.89543199 | 5.06E+08 | 0.06 | -4.37   | 3.37 | 0.07 |
| E2 | GY   | 3A | AX.89310676 | 5.33E+08 | 0.07 | -4.04   | 3.76 | 0.08 |
| E2 | GY   | 3A | AX.89310676 | 5.33E+08 | 0.07 | -4.04   | 3.76 | 0.08 |
| E2 | GY   | 3A | AX.89509103 | 5.59E+08 | 0.07 | -4.08   | 3.82 | 0.07 |
| E2 | GY   | 3A | AX.89509103 | 5.59E+08 | 0.07 | -4.08   | 3.82 | 0.07 |
| E2 | GY   | 3A | AX.89626071 | 5.57E+08 | 0.06 | -4.59   | 3.95 | 0.08 |
| E2 | GY   | 3A | AX.89774928 | 5.02E+08 | 0.07 | -3.92   | 3.37 | 0.07 |
| E2 | GY   | 3A | AX.89774928 | 5.02E+08 | 0.07 | -3.92   | 3.37 | 0.07 |
| E2 | GY   | 3A | AX.89521612 | 5.59E+08 | 0.07 | -4.26   | 3.69 | 0.07 |
| E2 | GY   | 3A | AX.89521612 | 5.59E+08 | 0.07 | -4.26   | 3.69 | 0.07 |
| E2 | GY   | 3A | AX.89679779 | 5.57E+08 | 0.07 | -4.03   | 3.71 | 0.07 |
| E2 | GY   | 3A | AX.89679779 | 5.57E+08 | 0.07 | -4.03   | 3.71 | 0.07 |
| E2 | GPS  | 3A | AX.89718821 | 6.12E+08 | 0.09 | -2.59   | 3.81 | 0.08 |
| E2 | GY   | 3A | AX.89311399 | 5.57E+08 | 0.06 | -4.59   | 3.95 | 0.08 |
| E2 | GY   | 3A | AX.89311399 | 5.57E+08 | 0.06 | -4.59   | 3.95 | 0.08 |
| E2 | GY   | 3A | AX.89725821 | 5.30E+08 | 0.07 | -4.26   | 3.69 | 0.07 |
| E2 | GY   | 3A | AX.89725821 | 5.30E+08 | 0.07 | -4.26   | 3.69 | 0.07 |
| E2 | GY   | 3A | AX.89664608 | 5.64E+08 | 0.07 | -4.15   | 3.71 | 0.07 |
| E2 | GY   | 3A | AX.89664608 | 5.64E+08 | 0.07 | -4.15   | 3.71 | 0.07 |
| E2 | GY   | 3A | AX.89345293 | 5.30E+08 | 0.07 | -4.26   | 3.69 | 0.07 |
| E2 | GY   | 3A | AX.89345293 | 5.30E+08 | 0.07 | -4.26   | 3.69 | 0.07 |
| E2 | GY   | 3A | AX.89522243 | 5.64E+08 | 0.07 | -4.26   | 3.69 | 0.07 |
| E2 | GY   | 3A | AX.89522243 | 5.64E+08 | 0.07 | -4.26   | 3.69 | 0.07 |
| E2 | GY   | 3A | AX.89345380 | 5.30E+08 | 0.07 | -4.26   | 3.69 | 0.07 |
| E2 | GY   | 3A | AX.89345380 | 5.30E+08 | 0.07 | -4.26   | 3.69 | 0.07 |
| E2 | GY   | 3A | AX.89345419 | 5.56E+08 | 0.10 | -3.52   | 3.64 | 0.08 |
| E2 | GY   | 3A | AX.89345419 | 5.56E+08 | 0.10 | -3.52   | 3.64 | 0.08 |
| E2 | GY   | 3A | AX.89440110 | 5.60E+08 | 0.07 | -4.26   | 3.69 | 0.07 |
| E2 | GY   | 3A | AX.89440110 | 5.60E+08 | 0.07 | -4.26   | 3.69 | 0.07 |
| E2 | GY   | 3A | AX.89660590 | 5.67E+08 | 0.07 | -4.26   | 3.69 | 0.07 |
| E2 | GY   | 3A | AX.89660590 | 5.67E+08 | 0.07 | -4.26   | 3.69 | 0.07 |
| E2 | GY   | 3A | AX.89556344 | 5.67E+08 | 0.07 | -4.26   | 3.69 | 0.07 |
| E2 | GY   | 3A | AX.89556344 | 5.67E+08 | 0.07 | -4.26   | 3.69 | 0.07 |
| E2 | GY   | 3A | AX.89568518 | 5.64E+08 | 0.08 | -3.74   | 3.43 | 0.07 |
| E2 | GY   | 3A | AX.89568518 | 5.64E+08 | 0.08 | -3.74   | 3.43 | 0.07 |
| E2 | GY   | 3A | AX.89462670 | 5.60E+08 | 0.07 | -4.26   | 3.69 | 0.07 |



|    |      |    |             |          |      |         |      |      |
|----|------|----|-------------|----------|------|---------|------|------|
| E2 | GY   | 3A | AX.89462670 | 5.60E+08 | 0.07 | -4.26   | 3.69 | 0.07 |
| E2 | GY   | 3A | AX.89393527 | 5.30E+08 | 0.07 | -4.26   | 3.69 | 0.07 |
| E2 | GY   | 3A | AX.89452058 | 5.59E+08 | 0.07 | -4.15   | 3.71 | 0.07 |
| E2 | GY   | 3A | AX.89452058 | 5.59E+08 | 0.07 | -4.15   | 3.71 | 0.07 |
| E2 | GPM2 | 3A | AX.89397235 | 7.49E+08 | 0.08 | -880.17 | 3.04 | 0.04 |
| E2 | TKW  | 3A | AX.89768808 | 5.34E+08 | 0.17 | -1.20   | 3.02 | 0.05 |
| E2 | TKW  | 3A | AX.89382610 | 7.44E+08 | 0.38 | -1.11   | 4.11 | 0.08 |
| E2 | GY   | 3A | AX.89463371 | 5.61E+08 | 0.07 | -4.26   | 3.69 | 0.07 |
| E2 | GY   | 3A | AX.89394430 | 5.56E+08 | 0.10 | -3.52   | 3.64 | 0.08 |
| E2 | GY   | 3A | AX.89313638 | 5.62E+08 | 0.07 | -4.15   | 3.71 | 0.07 |
| E2 | GY   | 3A | AX.89313638 | 5.62E+08 | 0.07 | -4.15   | 3.71 | 0.07 |
| E2 | GY   | 3A | AX.89607044 | 5.64E+08 | 0.07 | -4.26   | 3.69 | 0.07 |
| E2 | GY   | 3A | AX.89607044 | 5.64E+08 | 0.07 | -4.26   | 3.69 | 0.07 |
| E2 | GY   | 3A | AX.89720963 | 5.63E+08 | 0.07 | -4.26   | 3.69 | 0.07 |
| E2 | GY   | 3A | AX.89720963 | 5.63E+08 | 0.07 | -4.26   | 3.69 | 0.07 |
| E2 | GY   | 3A | AX.89593477 | 5.30E+08 | 0.07 | -4.26   | 3.69 | 0.07 |
| E2 | GY   | 3A | AX.89593477 | 5.30E+08 | 0.07 | -4.26   | 3.69 | 0.07 |
| E2 | GY   | 3A | AX.89594762 | 5.59E+08 | 0.07 | -4.26   | 3.69 | 0.07 |
| E2 | GY   | 3A | AX.89594762 | 5.59E+08 | 0.07 | -4.26   | 3.69 | 0.07 |
| E2 | GY   | 3A | AX.89765446 | 5.59E+08 | 0.07 | -4.26   | 3.69 | 0.07 |
| E2 | GY   | 3A | AX.89765446 | 5.59E+08 | 0.07 | -4.26   | 3.69 | 0.07 |
| E2 | GY   | 3A | AX.89630315 | 5.61E+08 | 0.07 | -4.26   | 3.69 | 0.07 |
| E2 | GY   | 3A | AX.89630315 | 5.61E+08 | 0.07 | -4.26   | 3.69 | 0.07 |
| E2 | GY   | 3A | AX.89314273 | 5.17E+08 | 0.05 | -4.70   | 3.51 | 0.07 |
| E2 | GY   | 3A | AX.89314273 | 5.17E+08 | 0.05 | -4.70   | 3.51 | 0.07 |
| E2 | GY   | 3A | AX.89607530 | 5.57E+08 | 0.06 | -4.59   | 3.95 | 0.08 |
| E2 | GY   | 3A | AX.89630400 | 4.98E+08 | 0.06 | -4.16   | 3.31 | 0.07 |
| E2 | GY   | 3A | AX.89630400 | 4.98E+08 | 0.06 | -4.16   | 3.31 | 0.07 |
| E2 | GPM2 | 3A | AX.89529388 | 7.49E+08 | 0.08 | -855.62 | 3.04 | 0.04 |
| E2 | GY   | 3A | AX.89454165 | 5.61E+08 | 0.07 | -4.55   | 4.13 | 0.08 |
| E2 | GY   | 3A | AX.89454165 | 5.61E+08 | 0.07 | -4.55   | 4.13 | 0.08 |
| E2 | GY   | 3A | AX.89727512 | 5.68E+08 | 0.10 | -3.52   | 3.64 | 0.08 |
| E2 | GY   | 3A | AX.89727512 | 5.68E+08 | 0.10 | -3.52   | 3.64 | 0.08 |
| E2 | GY   | 3A | AX.89383700 | 5.60E+08 | 0.07 | -4.26   | 3.69 | 0.07 |
| E2 | GY   | 3A | AX.89383700 | 5.60E+08 | 0.07 | -4.26   | 3.69 | 0.07 |
| E2 | GY   | 3A | AX.89383890 | 5.61E+08 | 0.07 | -4.26   | 3.69 | 0.07 |
| E2 | GY   | 3A | AX.89383890 | 5.61E+08 | 0.07 | -4.26   | 3.69 | 0.07 |
| E2 | GY   | 3A | AX.89668618 | 5.57E+08 | 0.07 | -4.15   | 3.71 | 0.07 |
| E2 | GY   | 3A | AX.89668618 | 5.57E+08 | 0.07 | -4.15   | 3.71 | 0.07 |
| E2 | GY   | 3A | AX.89526633 | 5.17E+08 | 0.05 | -5.07   | 3.72 | 0.07 |
| E2 | GY   | 3A | AX.89526633 | 5.17E+08 | 0.05 | -5.07   | 3.72 | 0.07 |
| E2 | GY   | 3A | AX.89384580 | 5.62E+08 | 0.07 | -4.26   | 3.69 | 0.07 |
| E2 | GY   | 3A | AX.89384580 | 5.62E+08 | 0.07 | -4.26   | 3.69 | 0.07 |
| E2 | GY   | 3A | AX.89349395 | 5.59E+08 | 0.07 | -4.15   | 3.71 | 0.07 |
| E2 | GY   | 3A | AX.89349395 | 5.59E+08 | 0.07 | -4.15   | 3.71 | 0.07 |
| E2 | GY   | 3A | AX.89526840 | 5.61E+08 | 0.07 | -4.26   | 3.69 | 0.07 |
| E2 | GY   | 3A | AX.89526840 | 5.61E+08 | 0.07 | -4.26   | 3.69 | 0.07 |
| E2 | GY   | 3A | AX.89742239 | 5.29E+08 | 0.07 | -4.26   | 3.69 | 0.07 |
| E2 | GY   | 3A | AX.89527187 | 5.33E+08 | 0.07 | -4.04   | 3.76 | 0.08 |
| E2 | GY   | 3A | AX.89527187 | 5.33E+08 | 0.07 | -4.04   | 3.76 | 0.08 |

|    |      |    |             |          |      |         |      |      |
|----|------|----|-------------|----------|------|---------|------|------|
| E2 | GY   | 3A | AX.89385367 | 5.64E+08 | 0.07 | -4.26   | 3.69 | 0.07 |
| E2 | GY   | 3A | AX.89385367 | 5.64E+08 | 0.07 | -4.26   | 3.69 | 0.07 |
| E2 | GY   | 3A | AX.89385489 | 5.65E+08 | 0.07 | -4.26   | 3.69 | 0.07 |
| E2 | GY   | 3A | AX.89385489 | 5.65E+08 | 0.07 | -4.26   | 3.69 | 0.07 |
| E2 | GY   | 3A | AX.89375055 | 5.30E+08 | 0.07 | -4.26   | 3.69 | 0.07 |
| E2 | GY   | 3A | AX.89375055 | 5.30E+08 | 0.07 | -4.26   | 3.69 | 0.07 |
| E2 | GY   | 3A | AX.89516559 | 5.60E+08 | 0.07 | -4.26   | 3.69 | 0.07 |
| E2 | GY   | 3A | AX.89516559 | 5.60E+08 | 0.07 | -4.26   | 3.69 | 0.07 |
| E2 | GY   | 3A | AX.89744040 | 5.16E+08 | 0.05 | -4.80   | 3.69 | 0.08 |
| E2 | GY   | 3A | AX.89744040 | 5.16E+08 | 0.05 | -4.80   | 3.69 | 0.08 |
| E2 | GY   | 3A | AX.89682331 | 5.59E+08 | 0.07 | -4.26   | 3.69 | 0.07 |
| E2 | GY   | 3A | AX.89438779 | 5.57E+08 | 0.07 | -4.26   | 3.69 | 0.07 |
| E2 | GY   | 3A | AX.89438779 | 5.57E+08 | 0.07 | -4.26   | 3.69 | 0.07 |
| E2 | GY   | 3A | AX.89386252 | 5.57E+08 | 0.06 | -4.59   | 3.95 | 0.08 |
| E2 | GY   | 3A | AX.89386252 | 5.57E+08 | 0.06 | -4.59   | 3.95 | 0.08 |
| E2 | GY   | 3A | AX.89598565 | 5.64E+08 | 0.07 | -4.15   | 3.71 | 0.07 |
| E2 | GY   | 3A | AX.89481801 | 5.59E+08 | 0.07 | -4.26   | 3.69 | 0.07 |
| E2 | GY   | 3A | AX.89481801 | 5.59E+08 | 0.07 | -4.26   | 3.69 | 0.07 |
| E2 | GY   | 3A | AX.89716645 | 5.30E+08 | 0.07 | -4.26   | 3.69 | 0.07 |
| E2 | GY   | 3A | AX.89716645 | 5.30E+08 | 0.07 | -4.26   | 3.69 | 0.07 |
| E2 | GY   | 3A | AX.89562813 | 5.63E+08 | 0.07 | -4.26   | 3.69 | 0.07 |
| E2 | GY   | 3A | AX.89562813 | 5.63E+08 | 0.07 | -4.26   | 3.69 | 0.07 |
| E2 | GY   | 3A | AX.89597375 | 5.30E+08 | 0.07 | -4.26   | 3.69 | 0.07 |
| E2 | GY   | 3A | AX.89704455 | 5.33E+08 | 0.08 | -3.96   | 3.79 | 0.07 |
| E2 | GY   | 3A | AX.89704455 | 5.33E+08 | 0.08 | -3.96   | 3.79 | 0.07 |
| E2 | GY   | 3A | AX.89599695 | 5.30E+08 | 0.07 | -4.26   | 3.69 | 0.07 |
| E2 | GY   | 3A | AX.89599695 | 5.30E+08 | 0.07 | -4.26   | 3.69 | 0.07 |
| E2 | GY   | 3A | AX.89750188 | 5.33E+08 | 0.07 | -4.04   | 3.76 | 0.08 |
| E2 | GY   | 3A | AX.89750188 | 5.33E+08 | 0.07 | -4.04   | 3.76 | 0.08 |
| E2 | GY   | 3A | AX.89387248 | 5.59E+08 | 0.07 | -4.26   | 3.69 | 0.07 |
| E2 | GY   | 3A | AX.89387248 | 5.59E+08 | 0.07 | -4.26   | 3.69 | 0.07 |
| E2 | GY   | 3A | AX.89423623 | 5.61E+08 | 0.07 | -4.26   | 3.69 | 0.07 |
| E2 | GY   | 3A | AX.89423623 | 5.61E+08 | 0.07 | -4.26   | 3.69 | 0.07 |
| E2 | GY   | 3A | AX.89457642 | 5.57E+08 | 0.06 | -4.59   | 3.95 | 0.08 |
| E2 | GY   | 3A | AX.89457642 | 5.57E+08 | 0.06 | -4.59   | 3.95 | 0.08 |
| E2 | GY   | 3A | AX.89756665 | 5.31E+08 | 0.07 | -4.26   | 3.69 | 0.07 |
| E2 | GY   | 3A | AX.89563886 | 5.17E+08 | 0.05 | -5.07   | 3.72 | 0.07 |
| E2 | GY   | 3A | AX.89563886 | 5.17E+08 | 0.05 | -5.07   | 3.72 | 0.07 |
| E2 | GY   | 3A | AX.89635567 | 5.32E+08 | 0.07 | -4.26   | 3.69 | 0.07 |
| E2 | GY   | 3A | AX.89635567 | 5.32E+08 | 0.07 | -4.26   | 3.69 | 0.07 |
| E2 | GY   | 3A | AX.89720247 | 5.64E+08 | 0.07 | -4.26   | 3.69 | 0.07 |
| E2 | GY   | 3A | AX.89720247 | 5.64E+08 | 0.07 | -4.26   | 3.69 | 0.07 |
| E2 | GPM2 | 3A | AX.89636747 | 5.56E+08 | 0.10 | -811.26 | 3.06 | 0.06 |
| E2 | GY   | 3A | AX.89353322 | 5.64E+08 | 0.07 | -4.26   | 3.69 | 0.07 |
| E2 | GY   | 3A | AX.89353322 | 5.64E+08 | 0.07 | -4.26   | 3.69 | 0.07 |
| E2 | GY   | 3A | AX.89319693 | 5.59E+08 | 0.07 | -4.26   | 3.69 | 0.07 |
| E2 | GY   | 3A | AX.89319693 | 5.59E+08 | 0.07 | -4.26   | 3.69 | 0.07 |
| E2 | GY   | 3A | AX.89757136 | 5.30E+08 | 0.07 | -4.26   | 3.69 | 0.07 |
| E2 | GY   | 3A | AX.89757136 | 5.30E+08 | 0.07 | -4.26   | 3.69 | 0.07 |
| E2 | GY   | 3A | AX.89564453 | 5.30E+08 | 0.07 | -4.26   | 3.69 | 0.07 |

|    |      |    |             |          |      |         |      |      |
|----|------|----|-------------|----------|------|---------|------|------|
| E2 | GY   | 3A | AX.89564453 | 5.30E+08 | 0.07 | -4.26   | 3.69 | 0.07 |
| E2 | GY   | 3A | AX.89612125 | 5.58E+08 | 0.07 | -4.15   | 3.71 | 0.07 |
| E2 | GY   | 3A | AX.89518939 | 5.57E+08 | 0.07 | -4.03   | 3.71 | 0.07 |
| E2 | GY   | 3A | AX.89518939 | 5.57E+08 | 0.07 | -4.03   | 3.71 | 0.07 |
| E2 | GY   | 3A | AX.89673581 | 5.33E+08 | 0.07 | -4.04   | 3.76 | 0.08 |
| E2 | GY   | 3A | AX.89655976 | 5.65E+08 | 0.07 | -4.26   | 3.69 | 0.07 |
| E2 | GY   | 3A | AX.89655976 | 5.65E+08 | 0.07 | -4.26   | 3.69 | 0.07 |
| E2 | GY   | 3A | AX.89601255 | 5.59E+08 | 0.07 | -4.26   | 3.69 | 0.07 |
| E2 | GY   | 3A | AX.89601255 | 5.59E+08 | 0.07 | -4.26   | 3.69 | 0.07 |
| E2 | GY   | 3A | AX.89458977 | 5.62E+08 | 0.07 | -4.26   | 3.69 | 0.07 |
| E2 | GY   | 3A | AX.89458977 | 5.62E+08 | 0.07 | -4.26   | 3.69 | 0.07 |
| E2 | GY   | 3A | AX.89734810 | 5.33E+08 | 0.07 | -4.04   | 3.76 | 0.08 |
| E2 | GY   | 3A | AX.89601456 | 5.32E+08 | 0.07 | -4.26   | 3.69 | 0.07 |
| E2 | GY   | 3A | AX.89754538 | 5.61E+08 | 0.07 | -4.26   | 3.69 | 0.07 |
| E2 | GY   | 3A | AX.89754538 | 5.61E+08 | 0.07 | -4.26   | 3.69 | 0.07 |
| E2 | GY   | 3A | AX.89726743 | 5.29E+08 | 0.07 | -4.26   | 3.69 | 0.07 |
| E2 | GY   | 3A | AX.89496168 | 5.64E+08 | 0.07 | -4.26   | 3.69 | 0.07 |
| E2 | GY   | 3A | AX.89496168 | 5.64E+08 | 0.07 | -4.26   | 3.69 | 0.07 |
| E2 | GY   | 3A | AX.89321584 | 5.30E+08 | 0.07 | -4.26   | 3.69 | 0.07 |
| E2 | GY   | 3A | AX.89321584 | 5.30E+08 | 0.07 | -4.26   | 3.69 | 0.07 |
| E2 | GY   | 3A | AX.89460048 | 5.30E+08 | 0.07 | -4.26   | 3.69 | 0.07 |
| E2 | GY   | 3A | AX.89460048 | 5.30E+08 | 0.07 | -4.26   | 3.69 | 0.07 |
| E2 | GY   | 3A | AX.89496396 | 5.57E+08 | 0.06 | -4.93   | 4.17 | 0.08 |
| E2 | GY   | 3A | AX.89496396 | 5.57E+08 | 0.06 | -4.93   | 4.17 | 0.08 |
| E2 | GY   | 3A | AX.89460523 | 5.60E+08 | 0.07 | -4.26   | 3.69 | 0.07 |
| E2 | GY   | 3A | AX.89670992 | 5.64E+08 | 0.07 | -4.26   | 3.69 | 0.07 |
| E2 | GY   | 3A | AX.89670992 | 5.64E+08 | 0.07 | -4.26   | 3.69 | 0.07 |
| E2 | GY   | 3A | AX.89344238 | 5.63E+08 | 0.07 | -4.26   | 3.69 | 0.07 |
| E2 | GY   | 3A | AX.89344238 | 5.63E+08 | 0.07 | -4.26   | 3.69 | 0.07 |
| E2 | GY   | 3A | AX.89733627 | 5.59E+08 | 0.07 | -4.26   | 3.69 | 0.07 |
| E2 | GY   | 3A | AX.89733627 | 5.59E+08 | 0.07 | -4.26   | 3.69 | 0.07 |
| E2 | GPM2 | 3A | AX.89331029 | 7.50E+08 | 0.08 | -880.17 | 3.04 | 0.04 |
| E2 | GY   | 3A | AX.89703808 | 5.63E+08 | 0.07 | -4.26   | 3.69 | 0.07 |
| E2 | GY   | 3A | AX.89703808 | 5.63E+08 | 0.07 | -4.26   | 3.69 | 0.07 |
| E2 | GY   | 3A | AX.89567012 | 5.58E+08 | 0.07 | -4.26   | 3.69 | 0.07 |
| E2 | GY   | 3A | AX.89567012 | 5.58E+08 | 0.07 | -4.26   | 3.69 | 0.07 |
| E2 | GY   | 3A | AX.89322989 | 5.44E+08 | 0.05 | -4.80   | 3.69 | 0.08 |
| E2 | GY   | 3A | AX.89322989 | 5.44E+08 | 0.05 | -4.80   | 3.69 | 0.08 |
| E2 | GY   | 3A | AX.89676497 | 5.59E+08 | 0.07 | -4.26   | 3.69 | 0.07 |
| E2 | GY   | 3A | AX.89676497 | 5.59E+08 | 0.07 | -4.26   | 3.69 | 0.07 |
| E2 | GY   | 3A | AX.89567808 | 5.58E+08 | 0.07 | -4.26   | 3.69 | 0.07 |
| E2 | GY   | 3A | AX.89497689 | 7.37E+08 | 0.18 | -2.47   | 3.08 | 0.05 |
| E2 | GY   | 3A | AX.89497689 | 7.37E+08 | 0.18 | -2.47   | 3.08 | 0.05 |
| E2 | GY   | 3A | AX.89713866 | 5.62E+08 | 0.07 | -4.26   | 3.69 | 0.07 |
| E2 | GY   | 3A | AX.89713866 | 5.62E+08 | 0.07 | -4.26   | 3.69 | 0.07 |
| E2 | GY   | 3A | AX.89718518 | 5.63E+08 | 0.06 | -4.52   | 3.87 | 0.08 |
| E2 | GY   | 3A | AX.89718518 | 5.63E+08 | 0.06 | -4.52   | 3.87 | 0.08 |
| E2 | GY   | 3A | AX.89677070 | 5.60E+08 | 0.07 | -4.26   | 3.69 | 0.07 |
| E2 | GY   | 3A | AX.89677070 | 5.60E+08 | 0.07 | -4.26   | 3.69 | 0.07 |
| E2 | GY   | 3A | AX.89357905 | 7.37E+08 | 0.18 | -2.47   | 3.08 | 0.05 |

|    |    |    |             |          |      |       |      |      |
|----|----|----|-------------|----------|------|-------|------|------|
| E2 | GY | 3A | AX.89357905 | 7.37E+08 | 0.18 | -2.47 | 3.08 | 0.05 |
| E2 | GY | 3A | AX.89677780 | 5.30E+08 | 0.07 | -4.26 | 3.69 | 0.07 |
| E2 | GY | 3A | AX.89677780 | 5.30E+08 | 0.07 | -4.26 | 3.69 | 0.07 |
| E2 | GY | 3A | AX.89393527 | 5.30E+08 | 0.07 | -4.26 | 3.69 | 0.07 |
| E2 | GY | 3A | AX.89715587 | 5.57E+08 | 0.07 | -4.26 | 3.69 | 0.07 |
| E2 | GY | 3A | AX.89715587 | 5.57E+08 | 0.07 | -4.26 | 3.69 | 0.07 |
| E2 | GY | 3A | AX.89393792 | 5.31E+08 | 0.07 | -4.26 | 3.69 | 0.07 |
| E2 | GY | 3A | AX.89393792 | 5.31E+08 | 0.07 | -4.26 | 3.69 | 0.07 |
| E2 | GY | 3A | AX.89358655 | 5.57E+08 | 0.07 | -4.26 | 3.69 | 0.07 |
| E2 | GY | 3A | AX.89358655 | 5.57E+08 | 0.07 | -4.26 | 3.69 | 0.07 |
| E2 | GY | 3A | AX.89557585 | 5.34E+08 | 0.07 | -4.04 | 3.76 | 0.08 |
| E2 | GY | 3A | AX.89557585 | 5.34E+08 | 0.07 | -4.04 | 3.76 | 0.08 |
| E2 | GY | 3A | AX.89463371 | 5.61E+08 | 0.07 | -4.26 | 3.69 | 0.07 |
| E2 | GY | 3A | AX.89394430 | 5.56E+08 | 0.10 | -3.52 | 3.64 | 0.08 |
| E2 | GY | 3A | AX.89573222 | 5.33E+08 | 0.07 | -4.04 | 3.76 | 0.08 |
| E2 | GY | 3A | AX.89573222 | 5.33E+08 | 0.07 | -4.04 | 3.76 | 0.08 |
| E2 | GY | 3A | AX.89629072 | 5.57E+08 | 0.07 | -4.26 | 3.69 | 0.07 |
| E2 | GY | 3A | AX.89629072 | 5.57E+08 | 0.07 | -4.26 | 3.69 | 0.07 |
| E2 | GY | 3A | AX.89768652 | 5.63E+08 | 0.07 | -4.26 | 3.69 | 0.07 |
| E2 | GY | 3A | AX.89768652 | 5.63E+08 | 0.07 | -4.26 | 3.69 | 0.07 |
| E2 | GY | 3A | AX.89777808 | 5.68E+08 | 0.07 | -4.26 | 3.69 | 0.07 |
| E2 | GY | 3A | AX.89777808 | 5.68E+08 | 0.07 | -4.26 | 3.69 | 0.07 |
| E2 | GY | 3A | AX.89535483 | 5.65E+08 | 0.07 | -4.26 | 3.69 | 0.07 |
| E2 | GY | 3A | AX.89535483 | 5.65E+08 | 0.07 | -4.26 | 3.69 | 0.07 |
| E2 | GY | 3A | AX.89594743 | 5.56E+08 | 0.10 | -3.52 | 3.64 | 0.08 |
| E2 | GY | 3A | AX.89594743 | 5.56E+08 | 0.10 | -3.52 | 3.64 | 0.08 |
| E2 | GY | 3A | AX.89395329 | 5.66E+08 | 0.07 | -4.26 | 3.69 | 0.07 |
| E2 | GY | 3A | AX.89395329 | 5.66E+08 | 0.07 | -4.26 | 3.69 | 0.07 |
| E2 | GY | 3A | AX.89431307 | 5.57E+08 | 0.06 | -4.59 | 3.95 | 0.08 |
| E2 | GY | 3A | AX.89431307 | 5.57E+08 | 0.06 | -4.59 | 3.95 | 0.08 |
| E2 | GY | 3A | AX.89679311 | 5.33E+08 | 0.07 | -4.04 | 3.76 | 0.08 |
| E2 | GY | 3A | AX.89679311 | 5.33E+08 | 0.07 | -4.04 | 3.76 | 0.08 |
| E2 | GY | 3A | AX.89607530 | 5.57E+08 | 0.06 | -4.59 | 3.95 | 0.08 |
| E2 | GY | 3A | AX.89326532 | 5.65E+08 | 0.07 | -4.26 | 3.69 | 0.07 |
| E2 | GY | 3A | AX.89326532 | 5.65E+08 | 0.07 | -4.26 | 3.69 | 0.07 |
| E2 | GY | 3A | AX.89464981 | 5.30E+08 | 0.07 | -4.26 | 3.69 | 0.07 |
| E2 | GY | 3A | AX.89464981 | 5.30E+08 | 0.07 | -4.26 | 3.69 | 0.07 |
| E2 | GY | 3A | AX.89326782 | 5.02E+08 | 0.07 | -3.78 | 3.01 | 0.06 |
| E2 | GY | 3A | AX.89326782 | 5.02E+08 | 0.07 | -3.78 | 3.01 | 0.06 |
| E2 | GY | 3A | AX.89638545 | 4.97E+08 | 0.06 | -4.16 | 3.31 | 0.07 |
| E2 | GY | 3A | AX.89360632 | 5.30E+08 | 0.07 | -4.26 | 3.69 | 0.07 |
| E2 | GY | 3A | AX.89360632 | 5.30E+08 | 0.07 | -4.26 | 3.69 | 0.07 |
| E2 | GY | 3A | AX.89326956 | 5.68E+08 | 0.10 | -3.52 | 3.64 | 0.08 |
| E2 | GY | 3A | AX.89326956 | 5.68E+08 | 0.10 | -3.52 | 3.64 | 0.08 |
| E2 | GY | 3A | AX.89536540 | 5.31E+08 | 0.07 | -4.26 | 3.69 | 0.07 |
| E2 | GY | 3A | AX.89536540 | 5.31E+08 | 0.07 | -4.26 | 3.69 | 0.07 |
| E2 | GY | 3A | AX.89327064 | 5.56E+08 | 0.06 | -4.59 | 3.95 | 0.08 |
| E2 | GY | 3A | AX.89327064 | 5.56E+08 | 0.06 | -4.59 | 3.95 | 0.08 |
| E2 | GY | 3A | AX.89327256 | 5.30E+08 | 0.07 | -4.26 | 3.69 | 0.07 |
| E2 | GY | 3A | AX.89327256 | 5.30E+08 | 0.07 | -4.26 | 3.69 | 0.07 |

|    |      |    |             |          |      |         |      |      |
|----|------|----|-------------|----------|------|---------|------|------|
| E2 | GY   | 3A | AX.89327279 | 5.58E+08 | 0.07 | -4.26   | 3.69 | 0.07 |
| E2 | GY   | 3A | AX.89327279 | 5.58E+08 | 0.07 | -4.26   | 3.69 | 0.07 |
| E2 | GY   | 3A | AX.89762706 | 5.30E+08 | 0.07 | -4.26   | 3.69 | 0.07 |
| E2 | GY   | 3A | AX.89762706 | 5.30E+08 | 0.07 | -4.26   | 3.69 | 0.07 |
| E2 | GY   | 3A | AX.89742239 | 5.29E+08 | 0.07 | -4.26   | 3.69 | 0.07 |
| E2 | GY   | 3A | AX.89398105 | 5.61E+08 | 0.07 | -4.26   | 3.69 | 0.07 |
| E2 | GY   | 3A | AX.89398105 | 5.61E+08 | 0.07 | -4.26   | 3.69 | 0.07 |
| E2 | GY   | 3A | AX.89433768 | 5.62E+08 | 0.07 | -4.26   | 3.69 | 0.07 |
| E2 | GY   | 3A | AX.89573025 | 5.63E+08 | 0.07 | -4.26   | 3.69 | 0.07 |
| E2 | GY   | 3A | AX.89573025 | 5.63E+08 | 0.07 | -4.26   | 3.69 | 0.07 |
| E2 | GY   | 3A | AX.89569139 | 5.30E+08 | 0.07 | -4.26   | 3.69 | 0.07 |
| E2 | GY   | 3A | AX.89569139 | 5.30E+08 | 0.07 | -4.26   | 3.69 | 0.07 |
| E2 | GY   | 3A | AX.89695116 | 5.24E+08 | 0.05 | -5.07   | 3.72 | 0.07 |
| E2 | GY   | 3A | AX.89467726 | 5.31E+08 | 0.07 | -3.98   | 3.47 | 0.07 |
| E2 | GY   | 3A | AX.89467726 | 5.31E+08 | 0.07 | -3.98   | 3.47 | 0.07 |
| E2 | GY   | 3A | AX.89528383 | 5.63E+08 | 0.07 | -4.26   | 3.69 | 0.07 |
| E2 | GY   | 3A | AX.89411123 | 5.59E+08 | 0.07 | -4.26   | 3.69 | 0.07 |
| E2 | GY   | 3A | AX.89682331 | 5.59E+08 | 0.07 | -4.26   | 3.69 | 0.07 |
| E2 | GY   | 3A | AX.89707852 | 5.59E+08 | 0.07 | -4.26   | 3.69 | 0.07 |
| E2 | GY   | 3A | AX.89573566 | 5.58E+08 | 0.07 | -4.26   | 3.69 | 0.07 |
| E2 | GY   | 3A | AX.89573566 | 5.58E+08 | 0.07 | -4.26   | 3.69 | 0.07 |
| E2 | GY   | 3A | AX.89597375 | 5.30E+08 | 0.07 | -4.26   | 3.69 | 0.07 |
| E2 | TKW  | 3A | AX.89766135 | 5.32E+08 | 0.16 | -1.25   | 3.11 | 0.05 |
| E2 | GY   | 3A | AX.89493587 | 5.57E+08 | 0.06 | -4.59   | 3.95 | 0.08 |
| E2 | GY   | 3A | AX.89329561 | 5.61E+08 | 0.07 | -4.26   | 3.69 | 0.07 |
| E2 | GY   | 3A | AX.89423647 | 5.56E+08 | 0.10 | -3.52   | 3.64 | 0.08 |
| E2 | GY   | 3A | AX.89423647 | 5.56E+08 | 0.10 | -3.52   | 3.64 | 0.08 |
| E2 | GY   | 3A | AX.89435715 | 5.30E+08 | 0.07 | -4.26   | 3.69 | 0.07 |
| E2 | GY   | 3A | AX.89756665 | 5.31E+08 | 0.07 | -4.26   | 3.69 | 0.07 |
| E2 | GY   | 3A | AX.89435911 | 5.59E+08 | 0.07 | -4.26   | 3.69 | 0.07 |
| E2 | GY   | 3A | AX.89469542 | 4.98E+08 | 0.06 | -4.16   | 3.31 | 0.07 |
| E2 | GY   | 3A | AX.89619325 | 5.29E+08 | 0.07 | -4.26   | 3.69 | 0.07 |
| E2 | GY   | 3A | AX.89619325 | 5.29E+08 | 0.07 | -4.26   | 3.69 | 0.07 |
| E2 | GY   | 3A | AX.89506121 | 5.66E+08 | 0.07 | -4.26   | 3.69 | 0.07 |
| E2 | GPM2 | 3A | AX.89318515 | 7.49E+08 | 0.08 | -855.62 | 3.04 | 0.04 |
| E2 | GY   | 3A | AX.89588092 | 5.57E+08 | 0.07 | -4.26   | 3.69 | 0.07 |
| E2 | GY   | 3A | AX.89726130 | 5.63E+08 | 0.07 | -4.26   | 3.69 | 0.07 |
| E2 | GY   | 3A | AX.89365214 | 5.31E+08 | 0.07 | -4.26   | 3.69 | 0.07 |
| E2 | GY   | 3A | AX.89361362 | 5.31E+08 | 0.06 | -4.59   | 3.95 | 0.08 |
| E2 | GY   | 3A | AX.89611948 | 5.33E+08 | 0.07 | -4.04   | 3.76 | 0.08 |
| E2 | GY   | 3A | AX.89612125 | 5.58E+08 | 0.07 | -4.15   | 3.71 | 0.07 |
| E2 | GY   | 3A | AX.89698099 | 5.30E+08 | 0.07 | -4.26   | 3.69 | 0.07 |
| E2 | GY   | 3A | AX.89601022 | 5.66E+08 | 0.06 | -4.59   | 3.95 | 0.08 |
| E2 | GY   | 3A | AX.89601022 | 5.66E+08 | 0.06 | -4.59   | 3.95 | 0.08 |
| E2 | GPM2 | 3A | AX.89577150 | 7.50E+08 | 0.08 | -880.17 | 3.04 | 0.04 |
| E2 | GY   | 3A | AX.89402066 | 7.19E+08 | 0.22 | -2.33   | 3.14 | 0.05 |
| E2 | GY   | 3A | AX.89402066 | 7.19E+08 | 0.22 | -2.33   | 3.14 | 0.05 |
| E2 | TKW  | 3A | AX.89463665 | 5.32E+08 | 0.16 | -1.25   | 3.11 | 0.05 |
| E2 | GY   | 3A | AX.89437126 | 5.58E+08 | 0.07 | -4.26   | 3.69 | 0.07 |
| E2 | GY   | 3A | AX.89589319 | 5.59E+08 | 0.07 | -4.26   | 3.69 | 0.07 |

|    |      |    |             |          |      |         |      |      |
|----|------|----|-------------|----------|------|---------|------|------|
| E2 | GY   | 3A | AX.89711026 | 5.33E+08 | 0.07 | -4.04   | 3.76 | 0.08 |
| E2 | GY   | 3A | AX.89711026 | 5.33E+08 | 0.07 | -4.04   | 3.76 | 0.08 |
| E2 | GY   | 3A | AX.89636747 | 5.56E+08 | 0.10 | -3.52   | 3.64 | 0.08 |
| E2 | GY   | 3A | AX.89636747 | 5.56E+08 | 0.10 | -3.52   | 3.64 | 0.08 |
| E2 | GY   | 3A | AX.89647632 | 5.57E+08 | 0.07 | -4.26   | 3.69 | 0.07 |
| E2 | GY   | 3A | AX.89511769 | 5.59E+08 | 0.07 | -4.26   | 3.69 | 0.07 |
| E2 | GY   | 3A | AX.89471709 | 5.56E+08 | 0.06 | -4.59   | 3.95 | 0.08 |
| E2 | GY   | 3A | AX.89471709 | 5.56E+08 | 0.06 | -4.59   | 3.95 | 0.08 |
| E2 | GY   | 3A | AX.89613280 | 5.59E+08 | 0.07 | -4.26   | 3.69 | 0.07 |
| E2 | GPM2 | 3A | AX.89345419 | 5.56E+08 | 0.10 | -811.26 | 3.06 | 0.06 |
| E2 | GY   | 3A | AX.89728466 | 4.99E+08 | 0.06 | -4.16   | 3.31 | 0.07 |
| E2 | GY   | 3A | AX.89720378 | 5.65E+08 | 0.07 | -4.26   | 3.69 | 0.07 |
| E2 | GY   | 3A | AX.89720378 | 5.65E+08 | 0.07 | -4.26   | 3.69 | 0.07 |
| E2 | GY   | 3A | AX.89343454 | 5.62E+08 | 0.07 | -4.45   | 4.18 | 0.08 |
| E2 | GY   | 3A | AX.89343454 | 5.62E+08 | 0.07 | -4.45   | 4.18 | 0.08 |
| E2 | GY   | 3A | AX.89674842 | 5.60E+08 | 0.07 | -4.26   | 3.69 | 0.07 |
| E2 | GY   | 3A | AX.89613713 | 5.57E+08 | 0.06 | -4.59   | 3.95 | 0.08 |
| E2 | GY   | 3A | AX.89554083 | 5.64E+08 | 0.07 | -4.26   | 3.69 | 0.07 |
| E2 | TKW  | 3A | AX.89557687 | 5.32E+08 | 0.16 | -1.25   | 3.11 | 0.05 |
| E2 | GY   | 3A | AX.89414910 | 5.57E+08 | 0.06 | -4.59   | 3.95 | 0.08 |
| E2 | GY   | 3A | AX.89414910 | 5.57E+08 | 0.06 | -4.59   | 3.95 | 0.08 |
| E2 | GY   | 3A | AX.89748200 | 5.66E+08 | 0.07 | -4.26   | 3.69 | 0.07 |
| E2 | GY   | 3A | AX.89712503 | 5.58E+08 | 0.07 | -4.26   | 3.69 | 0.07 |
| E2 | GY   | 3A | AX.89460831 | 5.29E+08 | 0.07 | -4.26   | 3.69 | 0.07 |
| E2 | GY   | 3A | AX.89427057 | 5.63E+08 | 0.07 | -4.26   | 3.69 | 0.07 |
| E2 | GY   | 3A | AX.89590996 | 5.31E+08 | 0.07 | -4.26   | 3.69 | 0.07 |
| E2 | GY   | 3A | AX.89554912 | 5.66E+08 | 0.07 | -4.26   | 3.69 | 0.07 |
| E2 | TKW  | 3A | AX.89644673 | 5.34E+08 | 0.17 | -1.20   | 3.02 | 0.05 |
| E2 | GY   | 3A | AX.89614818 | 5.59E+08 | 0.07 | -4.26   | 3.69 | 0.07 |
| E2 | GY   | 3A | AX.89497356 | 5.60E+08 | 0.07 | -4.26   | 3.69 | 0.07 |
| E2 | GY   | 3A | AX.89638327 | 5.66E+08 | 0.07 | -4.26   | 3.69 | 0.07 |
| E2 | GY   | 3A | AX.89638327 | 5.66E+08 | 0.07 | -4.26   | 3.69 | 0.07 |
| E2 | GY   | 3A | AX.89418431 | 5.65E+08 | 0.06 | -5.01   | 4.31 | 0.08 |
| E2 | GY   | 3A | AX.89626731 | 5.33E+08 | 0.07 | -4.04   | 3.76 | 0.08 |
| E2 | GY   | 3A | AX.89688752 | 5.56E+08 | 0.06 | -4.59   | 3.95 | 0.08 |
| E2 | GY   | 3A | AX.89701379 | 5.20E+08 | 0.05 | -6.52   | 5.90 | 0.12 |
| E2 | GY   | 3A | AX.89540978 | 5.44E+08 | 0.05 | -5.07   | 3.72 | 0.07 |
| E2 | GY   | 3A | AX.89583436 | 5.57E+08 | 0.06 | -4.59   | 3.95 | 0.08 |
| E2 | GY   | 3A | AX.89497931 | 5.57E+08 | 0.07 | -4.26   | 3.69 | 0.07 |
| E2 | GY   | 3A | AX.89497931 | 5.57E+08 | 0.07 | -4.26   | 3.69 | 0.07 |
| E2 | GY   | 3A | AX.89541040 | 5.16E+08 | 0.05 | -4.80   | 3.69 | 0.08 |
| E2 | GY   | 3A | AX.89558874 | 5.66E+08 | 0.06 | -4.59   | 3.95 | 0.08 |
| E2 | GY   | 3A | AX.89487853 | 5.57E+08 | 0.07 | -4.26   | 3.69 | 0.07 |
| E2 | GY   | 3A | AX.89673529 | 5.66E+08 | 0.07 | -4.26   | 3.69 | 0.07 |
| E2 | GY   | 3A | AX.89673529 | 5.66E+08 | 0.07 | -4.26   | 3.69 | 0.07 |
| E2 | GY   | 3A | AX.89665504 | 5.64E+08 | 0.07 | -4.26   | 3.69 | 0.07 |
| E2 | GY   | 3A | AX.89665504 | 5.64E+08 | 0.07 | -4.26   | 3.69 | 0.07 |
| E2 | GY   | 3A | AX.89545138 | 5.57E+08 | 0.07 | -4.26   | 3.69 | 0.07 |
| E2 | GY   | 3A | AX.89556791 | 5.64E+08 | 0.06 | -4.52   | 3.87 | 0.08 |
| E2 | GY   | 3A | AX.89556791 | 5.64E+08 | 0.06 | -4.52   | 3.87 | 0.08 |

|    |      |    |             |          |      |          |      |      |
|----|------|----|-------------|----------|------|----------|------|------|
| E2 | GPM2 | 3A | AX.89353440 | 7.50E+08 | 0.08 | -880.17  | 3.04 | 0.04 |
| E2 | GY   | 3A | AX.89702635 | 5.33E+08 | 0.07 | -4.04    | 3.76 | 0.08 |
| E2 | GY   | 3A | AX.89405683 | 5.60E+08 | 0.07 | -4.26    | 3.69 | 0.07 |
| E2 | GY   | 3A | AX.89530615 | 5.64E+08 | 0.07 | -4.26    | 3.69 | 0.07 |
| E2 | GY   | 3A | AX.89530615 | 5.64E+08 | 0.07 | -4.26    | 3.69 | 0.07 |
| E2 | GY   | 3A | AX.89358066 | 5.33E+08 | 0.07 | -4.04    | 3.76 | 0.08 |
| E2 | GY   | 3A | AX.89370365 | 5.29E+08 | 0.07 | -4.26    | 3.69 | 0.07 |
| E2 | GY   | 3A | AX.89440859 | 5.33E+08 | 0.07 | -4.04    | 3.76 | 0.08 |
| E2 | GY   | 3A | AX.89440859 | 5.33E+08 | 0.07 | -4.04    | 3.76 | 0.08 |
| E2 | GY   | 3A | AX.89334785 | 5.64E+08 | 0.07 | -4.26    | 3.69 | 0.07 |
| E2 | GY   | 3A | AX.89585123 | 5.16E+08 | 0.05 | -4.80    | 3.69 | 0.08 |
| E2 | GY   | 3A | AX.89406714 | 5.33E+08 | 0.07 | -4.04    | 3.76 | 0.08 |
| E2 | GY   | 3A | AX.89406714 | 5.33E+08 | 0.07 | -4.04    | 3.76 | 0.08 |
| E2 | TKW  | 3A | AX.89497520 | 7.44E+08 | 0.35 | -0.99    | 3.30 | 0.06 |
| E2 | GY   | 3A | AX.89407423 | 5.38E+07 | 0.07 | -4.67    | 4.21 | 0.08 |
| E2 | GY   | 3A | AX.89603026 | 5.57E+08 | 0.05 | -5.57    | 4.47 | 0.09 |
| E2 | GY   | 3A | AX.89603026 | 5.57E+08 | 0.05 | -5.57    | 4.47 | 0.09 |
| E2 | TKW  | 3A | AX.89690684 | 7.44E+08 | 0.30 | -1.01    | 3.17 | 0.05 |
| E2 | GY   | 3A | AX.89477075 | 5.57E+08 | 0.08 | -3.80    | 3.51 | 0.07 |
| E2 | GPS  | 3A | AX.89504837 | 6.13E+08 | 0.10 | -2.36    | 3.51 | 0.07 |
| E2 | GY   | 3A | AX.89606047 | 5.30E+08 | 0.07 | -4.26    | 3.69 | 0.07 |
| E2 | GY   | 3A | AX.89675998 | 5.30E+08 | 0.06 | -4.70    | 4.13 | 0.08 |
| E2 | GY   | 3A | AX.89408054 | 5.62E+08 | 0.07 | -4.26    | 3.69 | 0.07 |
| E2 | GY   | 3A | AX.89562144 | 5.57E+08 | 0.06 | -4.59    | 3.95 | 0.08 |
| E2 | GY   | 3A | AX.89562144 | 5.57E+08 | 0.06 | -4.59    | 3.95 | 0.08 |
| E2 | GY   | 3A | AX.89477864 | 5.66E+08 | 0.07 | -4.26    | 3.69 | 0.07 |
| E2 | GY   | 3A | AX.89477864 | 5.66E+08 | 0.07 | -4.26    | 3.69 | 0.07 |
| E2 | GY   | 3A | AX.89337100 | 5.65E+08 | 0.07 | -4.26    | 3.69 | 0.07 |
| E2 | GY   | 3A | AX.89701396 | 5.59E+08 | 0.07 | -4.26    | 3.69 | 0.07 |
| E2 | GY   | 3A | AX.89701396 | 5.59E+08 | 0.07 | -4.26    | 3.69 | 0.07 |
| E2 | GPM2 | 3A | AX.89573484 | 7.50E+08 | 0.08 | -880.17  | 3.04 | 0.04 |
| E2 | GPM2 | 3A | AX.89501429 | 7.49E+08 | 0.08 | -880.17  | 3.04 | 0.04 |
| E2 | GY   | 3A | AX.89361438 | 5.57E+08 | 0.06 | -4.59    | 3.95 | 0.08 |
| E2 | GY   | 3A | AX.89361438 | 5.57E+08 | 0.06 | -4.59    | 3.95 | 0.08 |
| E2 | GY   | 3A | AX.89778275 | 5.58E+08 | 0.07 | -4.26    | 3.69 | 0.07 |
| E2 | GY   | 3A | AX.89338270 | 5.34E+08 | 0.07 | -4.04    | 3.76 | 0.08 |
| E2 | GPM2 | 3A | AX.89445873 | 5.57E+08 | 0.05 | -1346.35 | 4.07 | 0.08 |
| E2 | GY   | 3A | AX.89681123 | 5.62E+08 | 0.07 | -4.26    | 3.69 | 0.07 |
| E2 | GPM2 | 3A | AX.89356571 | 7.49E+08 | 0.08 | -855.62  | 3.04 | 0.04 |
| E2 | GY   | 3A | AX.89702492 | 5.56E+08 | 0.10 | -3.36    | 3.49 | 0.07 |
| E2 | GY   | 3A | AX.89702492 | 5.56E+08 | 0.10 | -3.36    | 3.49 | 0.07 |
| E2 | GY   | 3A | AX.89410241 | 5.01E+08 | 0.06 | -4.16    | 3.31 | 0.07 |
| E2 | GY   | 3A | AX.89433768 | 5.62E+08 | 0.07 | -4.26    | 3.69 | 0.07 |
| E2 | GY   | 3A | AX.89695116 | 5.24E+08 | 0.05 | -5.07    | 3.72 | 0.07 |
| E2 | GPM2 | 3A | AX.89540925 | 7.48E+08 | 0.08 | -880.17  | 3.04 | 0.04 |
| E2 | GY   | 3A | AX.89561819 | 5.65E+08 | 0.07 | -4.26    | 3.69 | 0.07 |
| E2 | GY   | 3A | AX.89626214 | 5.58E+08 | 0.07 | -4.26    | 3.69 | 0.07 |
| E2 | GY   | 3A | AX.89375166 | 5.57E+08 | 0.06 | -5.33    | 4.82 | 0.10 |
| E2 | GY   | 3A | AX.89751312 | 5.57E+08 | 0.08 | -3.80    | 3.51 | 0.07 |
| E2 | GY   | 3A | AX.89695735 | 5.56E+08 | 0.10 | -3.36    | 3.49 | 0.07 |

|    |      |    |             |          |      |         |      |      |
|----|------|----|-------------|----------|------|---------|------|------|
| E2 | GY   | 3A | AX.89542448 | 5.30E+08 | 0.07 | -4.26   | 3.69 | 0.07 |
| E2 | GY   | 3A | AX.89654794 | 5.64E+08 | 0.07 | -4.26   | 3.69 | 0.07 |
| E2 | GY   | 3A | AX.89567996 | 5.33E+08 | 0.07 | -4.04   | 3.76 | 0.08 |
| E2 | GY   | 3A | AX.89468906 | 5.66E+08 | 0.07 | -4.26   | 3.69 | 0.07 |
| E2 | GY   | 3A | AX.89468906 | 5.66E+08 | 0.07 | -4.26   | 3.69 | 0.07 |
| E2 | GY   | 3A | AX.89483106 | 5.63E+08 | 0.07 | -4.26   | 3.69 | 0.07 |
| E2 | GY   | 3A | AX.89483106 | 5.63E+08 | 0.07 | -4.26   | 3.69 | 0.07 |
| E2 | GY   | 3A | AX.89629820 | 5.28E+08 | 0.05 | -5.07   | 3.72 | 0.07 |
| E2 | GY   | 3A | AX.89629820 | 5.28E+08 | 0.05 | -5.07   | 3.72 | 0.07 |
| E2 | GY   | 3A | AX.89412712 | 5.58E+08 | 0.07 | -4.26   | 3.69 | 0.07 |
| E2 | GY   | 3A | AX.89412712 | 5.58E+08 | 0.07 | -4.26   | 3.69 | 0.07 |
| E2 | GY   | 3A | AX.89469542 | 4.98E+08 | 0.06 | -4.16   | 3.31 | 0.07 |
| E2 | GPS  | 3A | AX.89324539 | 6.12E+08 | 0.09 | -2.59   | 3.81 | 0.08 |
| E2 | GY   | 3A | AX.89701379 | 5.20E+08 | 0.05 | -6.52   | 5.90 | 0.12 |
| E2 | GY   | 3A | AX.89361362 | 5.31E+08 | 0.06 | -4.59   | 3.95 | 0.08 |
| E2 | GY   | 3A | AX.89770986 | 5.66E+08 | 0.07 | -4.26   | 3.69 | 0.07 |
| E2 | GY   | 3A | AX.89770986 | 5.66E+08 | 0.07 | -4.26   | 3.69 | 0.07 |
| E2 | GPM2 | 3A | AX.89312937 | 7.48E+08 | 0.08 | -880.17 | 3.04 | 0.04 |
| E2 | GY   | 3A | AX.89460171 | 5.58E+08 | 0.07 | -4.26   | 3.69 | 0.07 |
| E2 | GY   | 3A | AX.89655270 | 5.65E+08 | 0.07 | -4.26   | 3.69 | 0.07 |
| E2 | GY   | 3A | AX.89587846 | 5.67E+08 | 0.07 | -4.26   | 3.69 | 0.07 |
| E2 | GY   | 3A | AX.89587846 | 5.67E+08 | 0.07 | -4.26   | 3.69 | 0.07 |
| E2 | GY   | 3A | AX.89707382 | 5.17E+08 | 0.05 | -4.53   | 3.32 | 0.07 |
| E2 | GY   | 3A | AX.89773033 | 5.62E+08 | 0.07 | -4.26   | 3.69 | 0.07 |
| E2 | GY   | 3A | AX.89511769 | 5.59E+08 | 0.07 | -4.26   | 3.69 | 0.07 |
| E2 | GY   | 3A | AX.89437577 | 5.56E+08 | 0.06 | -4.89   | 4.16 | 0.08 |
| E2 | GY   | 3A | AX.89437577 | 5.56E+08 | 0.06 | -4.89   | 4.16 | 0.08 |
| E2 | GY   | 3A | AX.89366707 | 5.33E+08 | 0.07 | -4.04   | 3.76 | 0.08 |
| E2 | GY   | 3A | AX.89366707 | 5.33E+08 | 0.07 | -4.04   | 3.76 | 0.08 |
| E2 | GY   | 3A | AX.89507644 | 5.57E+08 | 0.07 | -4.26   | 3.69 | 0.07 |
| E2 | GY   | 3A | AX.89507644 | 5.57E+08 | 0.07 | -4.26   | 3.69 | 0.07 |
| E2 | GY   | 3A | AX.89728466 | 4.99E+08 | 0.06 | -4.16   | 3.31 | 0.07 |
| E2 | GY   | 3A | AX.89542323 | 5.66E+08 | 0.07 | -4.26   | 3.69 | 0.07 |
| E2 | GY   | 3A | AX.89674842 | 5.60E+08 | 0.07 | -4.26   | 3.69 | 0.07 |
| E2 | GY   | 3A | AX.89426061 | 5.32E+08 | 0.06 | -4.52   | 3.87 | 0.08 |
| E2 | GY   | 3A | AX.89426061 | 5.32E+08 | 0.06 | -4.52   | 3.87 | 0.08 |
| E2 | GY   | 3A | AX.89390420 | 5.60E+08 | 0.07 | -4.26   | 3.69 | 0.07 |
| E2 | GY   | 3A | AX.89426725 | 5.56E+08 | 0.06 | -4.59   | 3.95 | 0.08 |
| E2 | GPS  | 3A | AX.89580701 | 6.13E+08 | 0.10 | -2.36   | 3.51 | 0.07 |
| E2 | GY   | 3A | AX.89760649 | 5.30E+08 | 0.07 | -4.15   | 3.71 | 0.07 |
| E2 | GPS  | 3A | AX.89659165 | 1.95E+07 | 0.18 | -1.74   | 3.12 | 0.05 |
| E2 | GPS  | 3A | AX.89391411 | 6.13E+08 | 0.10 | -2.36   | 3.51 | 0.07 |
| E2 | GY   | 3A | AX.89590996 | 5.31E+08 | 0.07 | -4.26   | 3.69 | 0.07 |
| E2 | GY   | 3A | AX.89509264 | 5.16E+08 | 0.05 | -4.80   | 3.69 | 0.08 |
| E2 | GY   | 3A | AX.89509264 | 5.16E+08 | 0.05 | -4.80   | 3.69 | 0.08 |
| E2 | GY   | 3A | AX.89614818 | 5.59E+08 | 0.07 | -4.26   | 3.69 | 0.07 |
| E2 | GY   | 3A | AX.89418431 | 5.65E+08 | 0.06 | -5.01   | 4.31 | 0.08 |
| E2 | GY   | 3A | AX.89626731 | 5.33E+08 | 0.07 | -4.04   | 3.76 | 0.08 |
| E2 | GPM2 | 3A | AX.89380387 | 7.49E+08 | 0.08 | -855.62 | 3.04 | 0.04 |
| E2 | TKW  | 3A | AX.89477257 | 7.44E+08 | 0.30 | -1.01   | 3.17 | 0.05 |



|    |      |    |             |          |      |         |      |      |
|----|------|----|-------------|----------|------|---------|------|------|
| E2 | GY   | 3A | AX.89345044 | 5.30E+08 | 0.06 | -4.59   | 3.95 | 0.08 |
| E2 | GY   | 3A | AX.89345044 | 5.30E+08 | 0.06 | -4.59   | 3.95 | 0.08 |
| E2 | GY   | 3A | AX.89345164 | 5.31E+08 | 0.07 | -4.26   | 3.69 | 0.07 |
| E2 | GY   | 3A | AX.89345164 | 5.31E+08 | 0.07 | -4.26   | 3.69 | 0.07 |
| E2 | GY   | 3A | AX.89558874 | 5.66E+08 | 0.06 | -4.59   | 3.95 | 0.08 |
| E2 | GY   | 3A | AX.89604406 | 5.31E+08 | 0.07 | -4.26   | 3.69 | 0.07 |
| E2 | TKW  | 3A | AX.89702309 | 4.80E+08 | 0.22 | -1.20   | 3.58 | 0.06 |
| E2 | TKW  | 3A | AX.89767042 | 5.32E+08 | 0.16 | -1.25   | 3.11 | 0.05 |
| E2 | GY   | 3A | AX.89714454 | 5.31E+08 | 0.07 | -4.26   | 3.69 | 0.07 |
| E2 | GY   | 3A | AX.89714454 | 5.31E+08 | 0.07 | -4.26   | 3.69 | 0.07 |
| E2 | GY   | 3A | AX.89345856 | 5.29E+08 | 0.07 | -4.26   | 3.69 | 0.07 |
| E2 | GY   | 3A | AX.89345856 | 5.29E+08 | 0.07 | -4.26   | 3.69 | 0.07 |
| E2 | GY   | 3A | AX.89393225 | 5.33E+08 | 0.07 | -4.04   | 3.76 | 0.08 |
| E2 | GPM2 | 3A | AX.89508524 | 7.48E+08 | 0.08 | -880.17 | 3.04 | 0.04 |
| E2 | GY   | 3A | AX.89498962 | 2.02E+07 | 0.05 | -5.09   | 3.77 | 0.08 |
| E2 | GY   | 3A | AX.89690071 | 5.66E+08 | 0.07 | -4.26   | 3.69 | 0.07 |
| E2 | GY   | 3A | AX.89686328 | 5.29E+08 | 0.07 | -4.26   | 3.69 | 0.07 |
| E2 | GY   | 3A | AX.89358865 | 5.29E+08 | 0.07 | -4.26   | 3.69 | 0.07 |
| E2 | GY   | 3A | AX.89358865 | 5.29E+08 | 0.07 | -4.26   | 3.69 | 0.07 |
| E2 | GY   | 3A | AX.89499718 | 5.31E+08 | 0.07 | -4.26   | 3.69 | 0.07 |
| E2 | GY   | 3A | AX.89499718 | 5.31E+08 | 0.07 | -4.26   | 3.69 | 0.07 |
| E2 | GY   | 3A | AX.89662284 | 5.63E+08 | 0.05 | -4.80   | 3.45 | 0.07 |
| E2 | GY   | 3A | AX.89662284 | 5.63E+08 | 0.05 | -4.80   | 3.45 | 0.07 |
| E2 | GY   | 3A | AX.89581530 | 5.61E+08 | 0.07 | -4.26   | 3.69 | 0.07 |
| E2 | GY   | 3A | AX.89581530 | 5.61E+08 | 0.07 | -4.26   | 3.69 | 0.07 |
| E2 | GPM2 | 3A | AX.89719342 | 7.50E+08 | 0.08 | -880.17 | 3.04 | 0.04 |
| E2 | GY   | 3A | AX.89679330 | 5.63E+08 | 0.07 | -4.15   | 3.71 | 0.07 |
| E2 | GY   | 3A | AX.89679330 | 5.63E+08 | 0.07 | -4.15   | 3.71 | 0.07 |
| E2 | GPS  | 3A | AX.89717399 | 6.13E+08 | 0.10 | -2.36   | 3.51 | 0.07 |
| E2 | GPM2 | 3A | AX.89311476 | 7.49E+08 | 0.08 | -880.17 | 3.04 | 0.04 |
| E2 | GY   | 3A | AX.89700017 | 5.58E+08 | 0.06 | -4.59   | 3.95 | 0.08 |
| E2 | GY   | 3A | AX.89700017 | 5.58E+08 | 0.06 | -4.59   | 3.95 | 0.08 |
| E2 | GY   | 3A | AX.89704338 | 5.57E+08 | 0.07 | -4.26   | 3.69 | 0.07 |
| E2 | GY   | 3A | AX.89704338 | 5.57E+08 | 0.07 | -4.26   | 3.69 | 0.07 |
| E2 | TKW  | 3A | AX.89632174 | 5.50E+08 | 0.05 | -2.34   | 3.54 | 0.06 |
| E2 | GY   | 3A | AX.89748881 | 5.29E+08 | 0.07 | -4.26   | 3.69 | 0.07 |
| E2 | GY   | 3A | AX.89748881 | 5.29E+08 | 0.07 | -4.26   | 3.69 | 0.07 |
| E2 | GY   | 3A | AX.89383778 | 7.36E+08 | 0.18 | -2.46   | 3.07 | 0.05 |
| E2 | GY   | 3A | AX.89383778 | 7.36E+08 | 0.18 | -2.46   | 3.07 | 0.05 |
| E2 | GY   | 3A | AX.89680429 | 5.63E+08 | 0.07 | -4.26   | 3.69 | 0.07 |
| E2 | GY   | 3A | AX.89680429 | 5.63E+08 | 0.07 | -4.26   | 3.69 | 0.07 |
| E2 | GY   | 3A | AX.89705720 | 6.96E+08 | 0.09 | -3.35   | 3.07 | 0.04 |
| E2 | GY   | 3A | AX.89705720 | 6.96E+08 | 0.09 | -3.35   | 3.07 | 0.04 |
| E2 | GY   | 3A | AX.89631354 | 5.16E+08 | 0.05 | -4.80   | 3.69 | 0.08 |
| E2 | GY   | 3A | AX.89631354 | 5.16E+08 | 0.05 | -4.80   | 3.69 | 0.08 |
| E2 | GY   | 3A | AX.89778275 | 5.58E+08 | 0.07 | -4.26   | 3.69 | 0.07 |
| E2 | TKW  | 3A | AX.89596098 | 7.44E+08 | 0.35 | -0.99   | 3.30 | 0.06 |
| E2 | TKW  | 3A | AX.89440804 | 4.80E+08 | 0.24 | -1.22   | 3.89 | 0.07 |
| E2 | GY   | 3A | AX.89637285 | 5.68E+08 | 0.07 | -4.26   | 3.69 | 0.07 |
| E2 | GY   | 3A | AX.89637285 | 5.68E+08 | 0.07 | -4.26   | 3.69 | 0.07 |

|    |      |    |             |          |      |         |      |      |
|----|------|----|-------------|----------|------|---------|------|------|
| E2 | TKW  | 3A | AX.89571342 | 7.44E+08 | 0.30 | -1.05   | 3.37 | 0.06 |
| E2 | GY   | 3A | AX.89576296 | 5.65E+08 | 0.07 | -4.26   | 3.69 | 0.07 |
| E2 | GY   | 3A | AX.89576296 | 5.65E+08 | 0.07 | -4.26   | 3.69 | 0.07 |
| E2 | GY   | 3A | AX.89561819 | 5.65E+08 | 0.07 | -4.26   | 3.69 | 0.07 |
| E2 | GY   | 3A | AX.89354763 | 5.57E+08 | 0.07 | -4.15   | 3.71 | 0.07 |
| E2 | GY   | 3A | AX.89688097 | 5.57E+08 | 0.06 | -4.59   | 3.95 | 0.08 |
| E2 | GY   | 3A | AX.89688097 | 5.57E+08 | 0.06 | -4.59   | 3.95 | 0.08 |
| E2 | GPM2 | 3A | AX.89693565 | 7.49E+08 | 0.08 | -855.62 | 3.04 | 0.04 |
| E2 | GY   | 3A | AX.89654794 | 5.64E+08 | 0.07 | -4.26   | 3.69 | 0.07 |
| E2 | GY   | 3A | AX.89707852 | 5.59E+08 | 0.07 | -4.26   | 3.69 | 0.07 |
| E2 | TKW  | 3A | AX.89608966 | 5.34E+08 | 0.17 | -1.20   | 3.02 | 0.05 |
| E2 | GY   | 3A | AX.89567996 | 5.33E+08 | 0.07 | -4.04   | 3.76 | 0.08 |
| E2 | GY   | 3A | AX.89529194 | 5.30E+08 | 0.07 | -4.26   | 3.69 | 0.07 |
| E2 | GPM2 | 3A | AX.89555917 | 7.50E+08 | 0.08 | -880.17 | 3.04 | 0.04 |
| E2 | GY   | 3A | AX.89646606 | 5.57E+08 | 0.07 | -4.26   | 3.69 | 0.07 |
| E2 | GY   | 3A | AX.89646606 | 5.57E+08 | 0.07 | -4.26   | 3.69 | 0.07 |
| E2 | TKW  | 3A | AX.89382187 | 5.34E+08 | 0.17 | -1.20   | 3.02 | 0.05 |
| E2 | TKW  | 3A | AX.89493328 | 5.34E+08 | 0.17 | -1.20   | 3.02 | 0.05 |
| E2 | GPM2 | 3A | AX.89326956 | 5.68E+08 | 0.10 | -811.26 | 3.06 | 0.06 |
| E2 | GY   | 3A | AX.89506121 | 5.66E+08 | 0.07 | -4.26   | 3.69 | 0.07 |
| E2 | GY   | 3A | AX.89726130 | 5.63E+08 | 0.07 | -4.26   | 3.69 | 0.07 |
| E2 | GPM2 | 3A | AX.89342351 | 7.50E+08 | 0.08 | -880.17 | 3.04 | 0.04 |
| E2 | GY   | 3A | AX.89698099 | 5.30E+08 | 0.07 | -4.26   | 3.69 | 0.07 |
| E2 | GY   | 3A | AX.89460171 | 5.58E+08 | 0.07 | -4.26   | 3.69 | 0.07 |
| E2 | GY   | 3A | AX.89655270 | 5.65E+08 | 0.07 | -4.26   | 3.69 | 0.07 |
| E2 | GPM2 | 3A | AX.89464588 | 7.47E+08 | 0.08 | -880.17 | 3.04 | 0.04 |
| E2 | GY   | 3A | AX.89589319 | 5.59E+08 | 0.07 | -4.26   | 3.69 | 0.07 |
| E2 | GY   | 3A | AX.89448842 | 5.01E+08 | 0.05 | -4.65   | 3.24 | 0.07 |
| E2 | GY   | 3A | AX.89448842 | 5.01E+08 | 0.05 | -4.65   | 3.24 | 0.07 |
| E2 | GY   | 3A | AX.89707382 | 5.17E+08 | 0.05 | -4.53   | 3.32 | 0.07 |
| E2 | GY   | 3A | AX.89647632 | 5.57E+08 | 0.07 | -4.26   | 3.69 | 0.07 |
| E2 | GY   | 3A | AX.89773033 | 5.62E+08 | 0.07 | -4.26   | 3.69 | 0.07 |
| E2 | GY   | 3A | AX.89723994 | 5.33E+08 | 0.07 | -4.04   | 3.76 | 0.08 |
| E2 | GY   | 3A | AX.89723994 | 5.33E+08 | 0.07 | -4.04   | 3.76 | 0.08 |
| E2 | GY   | 3A | AX.89354763 | 5.57E+08 | 0.07 | -4.15   | 3.71 | 0.07 |
| E2 | GPM2 | 3A | AX.89572110 | 7.47E+08 | 0.08 | -880.17 | 3.04 | 0.04 |
| E2 | TKW  | 3A | AX.89664544 | 7.44E+08 | 0.37 | -0.95   | 3.09 | 0.06 |
| E2 | GY   | 3A | AX.89390420 | 5.60E+08 | 0.07 | -4.26   | 3.69 | 0.07 |
| E2 | GY   | 3A | AX.89554083 | 5.64E+08 | 0.07 | -4.26   | 3.69 | 0.07 |
| E2 | TKW  | 3A | AX.89580115 | 4.50E+08 | 0.24 | -1.15   | 3.48 | 0.06 |
| E2 | GPM2 | 3A | AX.89727512 | 5.68E+08 | 0.10 | -811.26 | 3.06 | 0.06 |
| E2 | GY   | 3A | AX.89426725 | 5.56E+08 | 0.06 | -4.59   | 3.95 | 0.08 |
| E2 | GY   | 3A | AX.89760649 | 5.30E+08 | 0.07 | -4.15   | 3.71 | 0.07 |
| E2 | GPM2 | 3A | AX.89493850 | 7.50E+08 | 0.08 | -880.17 | 3.04 | 0.04 |
| E2 | GY   | 3A | AX.89415611 | 5.65E+08 | 0.06 | -4.38   | 3.63 | 0.07 |
| E2 | GY   | 3A | AX.89415611 | 5.65E+08 | 0.06 | -4.38   | 3.63 | 0.07 |
| E2 | TKW  | 3A | AX.89374984 | 7.44E+08 | 0.26 | -1.03   | 3.07 | 0.05 |
| E2 | GY   | 3A | AX.89578504 | 5.57E+08 | 0.07 | -4.03   | 3.71 | 0.07 |
| E2 | GY   | 3A | AX.89688752 | 5.56E+08 | 0.06 | -4.59   | 3.95 | 0.08 |
| E2 | GY   | 3A | AX.89461796 | 5.57E+08 | 0.05 | -5.57   | 4.47 | 0.09 |

|    |      |    |             |          |      |          |      |      |
|----|------|----|-------------|----------|------|----------|------|------|
| E2 | GY   | 3A | AX.89461796 | 5.57E+08 | 0.05 | -5.57    | 4.47 | 0.09 |
| E2 | GY   | 3A | AX.89514441 | 5.56E+08 | 0.10 | -3.36    | 3.49 | 0.07 |
| E2 | TKW  | 3A | AX.89555948 | 7.44E+08 | 0.30 | -1.05    | 3.37 | 0.06 |
| E2 | GY   | 3A | AX.89541040 | 5.16E+08 | 0.05 | -4.80    | 3.69 | 0.08 |
| E2 | GPM2 | 3A | AX.89601433 | 7.49E+08 | 0.08 | -855.62  | 3.04 | 0.04 |
| E2 | GY   | 3A | AX.89604406 | 5.31E+08 | 0.07 | -4.26    | 3.69 | 0.07 |
| E2 | GY   | 3A | AX.89623669 | 5.60E+08 | 0.07 | -4.26    | 3.69 | 0.07 |
| E2 | GY   | 3A | AX.89564685 | 5.17E+08 | 0.05 | -5.07    | 3.72 | 0.07 |
| E2 | GY   | 3A | AX.89564685 | 5.17E+08 | 0.05 | -5.07    | 3.72 | 0.07 |
| E2 | GPM2 | 3A | AX.89516976 | 7.48E+08 | 0.08 | -880.17  | 3.04 | 0.04 |
| E2 | GY   | 3A | AX.89498962 | 2.02E+07 | 0.05 | -5.09    | 3.77 | 0.08 |
| E2 | GY   | 3A | AX.89362303 | 5.56E+08 | 0.10 | -3.36    | 3.49 | 0.07 |
| E2 | GY   | 3A | AX.89686328 | 5.29E+08 | 0.07 | -4.26    | 3.69 | 0.07 |
| E2 | GPS  | 3A | AX.89623673 | 6.12E+08 | 0.09 | -2.59    | 3.81 | 0.08 |
| E2 | GPM2 | 3A | AX.89701379 | 5.20E+08 | 0.05 | -1218.05 | 3.42 | 0.07 |
| E2 | GY   | 3A | AX.89628912 | 5.65E+08 | 0.07 | -4.26    | 3.69 | 0.07 |
| E2 | GY   | 3A | AX.89628912 | 5.65E+08 | 0.07 | -4.26    | 3.69 | 0.07 |
| E2 | TKW  | 3A | AX.89575384 | 7.44E+08 | 0.26 | -1.06    | 3.21 | 0.05 |
| E2 | GY   | 3A | AX.89707474 | 5.59E+08 | 0.07 | -4.26    | 3.69 | 0.07 |
| E2 | GY   | 3A | AX.89499912 | 5.64E+08 | 0.07 | -4.26    | 3.69 | 0.07 |
| E2 | GY   | 3A | AX.89499912 | 5.64E+08 | 0.07 | -4.26    | 3.69 | 0.07 |
| E2 | GY   | 3A | AX.89617932 | 5.16E+08 | 0.05 | -4.80    | 3.69 | 0.08 |
| E2 | GY   | 3A | AX.89679150 | 5.02E+08 | 0.07 | -3.92    | 3.37 | 0.07 |
| E2 | GY   | 3A | AX.89679150 | 5.02E+08 | 0.07 | -3.92    | 3.37 | 0.07 |
| E2 | TKW  | 3A | AX.89445760 | 5.32E+08 | 0.16 | -1.25    | 3.11 | 0.05 |
| E2 | TKW  | 3A | AX.89346113 | 4.80E+08 | 0.22 | -1.20    | 3.58 | 0.06 |
| E2 | GPM2 | 3A | AX.89427953 | 7.51E+08 | 0.08 | -880.17  | 3.04 | 0.04 |
| E2 | TKW  | 3A | AX.89756173 | 5.32E+08 | 0.16 | -1.25    | 3.11 | 0.05 |
| E2 | GY   | 3A | AX.89465602 | 5.60E+08 | 0.07 | -4.26    | 3.69 | 0.07 |
| E2 | GPM2 | 3A | AX.89486709 | 7.47E+08 | 0.08 | -880.17  | 3.04 | 0.04 |
| E2 | TKW  | 3A | AX.89337779 | 7.44E+08 | 0.35 | -1.03    | 3.52 | 0.07 |
| E2 | GPM2 | 3A | AX.89723572 | 7.51E+08 | 0.08 | -880.17  | 3.04 | 0.04 |
| E2 | GY   | 3A | AX.89681095 | 5.66E+08 | 0.07 | -4.26    | 3.69 | 0.07 |
| E2 | GY   | 3A | AX.89681095 | 5.66E+08 | 0.07 | -4.26    | 3.69 | 0.07 |
| E2 | GY   | 3A | AX.89397410 | 5.67E+08 | 0.07 | -4.26    | 3.69 | 0.07 |
| E2 | GY   | 3A | AX.89397410 | 5.67E+08 | 0.07 | -4.26    | 3.69 | 0.07 |
| E2 | GY   | 3A | AX.89592870 | 5.31E+08 | 0.07 | -4.26    | 3.69 | 0.07 |
| E2 | GY   | 3A | AX.89560834 | 5.58E+08 | 0.07 | -4.26    | 3.69 | 0.07 |
| E2 | GY   | 3A | AX.89560834 | 5.58E+08 | 0.07 | -4.26    | 3.69 | 0.07 |
| E2 | TKW  | 3A | AX.89325426 | 4.80E+08 | 0.24 | -1.22    | 3.89 | 0.07 |
| E2 | GY   | 3A | AX.89731030 | 5.65E+08 | 0.07 | -4.26    | 3.69 | 0.07 |
| E2 | TKW  | 3A | AX.89310253 | 5.05E+08 | 0.30 | 1.04     | 3.31 | 0.06 |
| E2 | TKW  | 3A | AX.89566122 | 5.32E+08 | 0.16 | -1.25    | 3.11 | 0.05 |
| E2 | GY   | 3A | AX.89362303 | 5.56E+08 | 0.10 | -3.36    | 3.49 | 0.07 |
| E2 | GY   | 3A | AX.89370891 | 5.60E+08 | 0.07 | -4.26    | 3.69 | 0.07 |
| E2 | GY   | 3A | AX.89370891 | 5.60E+08 | 0.07 | -4.26    | 3.69 | 0.07 |
| E2 | GY   | 3A | AX.89375166 | 5.57E+08 | 0.06 | -5.33    | 4.82 | 0.10 |
| E2 | GY   | 3A | AX.89542323 | 5.66E+08 | 0.07 | -4.26    | 3.69 | 0.07 |
| E2 | GY   | 3A | AX.89707474 | 5.59E+08 | 0.07 | -4.26    | 3.69 | 0.07 |
| E2 | GY   | 3A | AX.89528383 | 5.63E+08 | 0.07 | -4.26    | 3.69 | 0.07 |

|    |      |    |             |          |      |         |      |      |
|----|------|----|-------------|----------|------|---------|------|------|
| E2 | GY   | 3A | AX.89751312 | 5.57E+08 | 0.08 | -3.80   | 3.51 | 0.07 |
| E2 | GPM2 | 3A | AX.89423647 | 5.56E+08 | 0.10 | -811.26 | 3.06 | 0.06 |
| E2 | GPM2 | 3A | AX.89568027 | 7.47E+08 | 0.08 | -880.17 | 3.04 | 0.04 |
| E2 | GY   | 3A | AX.89707136 | 5.31E+08 | 0.07 | -4.26   | 3.69 | 0.07 |
| E2 | GY   | 3A | AX.89483342 | 5.33E+08 | 0.07 | -4.04   | 3.76 | 0.08 |
| E2 | GY   | 3A | AX.89529194 | 5.30E+08 | 0.07 | -4.26   | 3.69 | 0.07 |
| E2 | TKW  | 3A | AX.89492626 | 7.44E+08 | 0.37 | -1.06   | 3.80 | 0.07 |
| E2 | GY   | 3A | AX.89659061 | 5.32E+08 | 0.07 | -4.26   | 3.69 | 0.07 |
| E2 | GY   | 3A | AX.89659061 | 5.32E+08 | 0.07 | -4.26   | 3.69 | 0.07 |
| E2 | GY   | 3A | AX.89493587 | 5.57E+08 | 0.06 | -4.59   | 3.95 | 0.08 |
| E2 | TKW  | 3A | AX.89748002 | 5.32E+08 | 0.16 | -1.25   | 3.11 | 0.05 |
| E2 | GPM2 | 3A | AX.89364941 | 7.50E+08 | 0.08 | -880.17 | 3.04 | 0.04 |
| E2 | TKW  | 3A | AX.89708628 | 7.44E+08 | 0.30 | -1.01   | 3.17 | 0.05 |
| E2 | GY   | 3A | AX.89435715 | 5.30E+08 | 0.07 | -4.26   | 3.69 | 0.07 |
| E2 | GY   | 3A | AX.89722203 | 5.64E+08 | 0.07 | -4.26   | 3.69 | 0.07 |
| E2 | GPS  | 3A | AX.89402066 | 7.19E+08 | 0.22 | -1.63   | 3.16 | 0.06 |
| E2 | GY   | 3A | AX.89365214 | 5.31E+08 | 0.07 | -4.26   | 3.69 | 0.07 |
| E2 | GY   | 3A | AX.89623669 | 5.60E+08 | 0.07 | -4.26   | 3.69 | 0.07 |
| E2 | GPM2 | 3A | AX.89633109 | 7.48E+08 | 0.08 | -880.17 | 3.04 | 0.04 |
| E2 | GPM2 | 3A | AX.89500043 | 7.50E+08 | 0.08 | -880.17 | 3.04 | 0.04 |
| E2 | GY   | 3A | AX.89592870 | 5.31E+08 | 0.07 | -4.26   | 3.69 | 0.07 |
| E2 | GY   | 3A | AX.89734810 | 5.33E+08 | 0.07 | -4.04   | 3.76 | 0.08 |
| E2 | GY   | 3A | AX.89370365 | 5.29E+08 | 0.07 | -4.26   | 3.69 | 0.07 |
| E2 | GY   | 3A | AX.89437309 | 5.59E+08 | 0.07 | -4.26   | 3.69 | 0.07 |
| E2 | GY   | 3A | AX.89437309 | 5.59E+08 | 0.07 | -4.26   | 3.69 | 0.07 |
| E2 | GY   | 3A | AX.89585123 | 5.16E+08 | 0.05 | -4.80   | 3.69 | 0.08 |
| E2 | GY   | 3A | AX.89613713 | 5.57E+08 | 0.06 | -4.59   | 3.95 | 0.08 |
| E2 | GY   | 3A | AX.89460227 | 7.36E+08 | 0.18 | -2.47   | 3.08 | 0.05 |
| E2 | GY   | 3A | AX.89460227 | 7.36E+08 | 0.18 | -2.47   | 3.08 | 0.05 |
| E2 | GY   | 3A | AX.89675504 | 5.63E+08 | 0.07 | -4.26   | 3.69 | 0.07 |
| E2 | GY   | 3A | AX.89712503 | 5.58E+08 | 0.07 | -4.26   | 3.69 | 0.07 |
| E2 | GPM2 | 3A | AX.89738862 | 7.50E+08 | 0.08 | -880.17 | 3.04 | 0.04 |
| E2 | GY   | 3A | AX.89427057 | 5.63E+08 | 0.07 | -4.26   | 3.69 | 0.07 |
| E2 | GY   | 3A | AX.89614630 | 5.33E+08 | 0.07 | -4.04   | 3.76 | 0.08 |
| E2 | GY   | 3A | AX.89614630 | 5.33E+08 | 0.07 | -4.04   | 3.76 | 0.08 |
| E2 | TKW  | 3A | AX.89756096 | 5.32E+08 | 0.16 | -1.25   | 3.11 | 0.05 |
| E2 | GPM2 | 3A | AX.89752607 | 7.49E+08 | 0.08 | -880.17 | 3.04 | 0.04 |
| E2 | GY   | 3A | AX.89578504 | 5.57E+08 | 0.07 | -4.03   | 3.71 | 0.07 |
| E2 | GY   | 3A | AX.89551367 | 5.33E+08 | 0.07 | -4.04   | 3.76 | 0.08 |
| E2 | GY   | 3A | AX.89551367 | 5.33E+08 | 0.07 | -4.04   | 3.76 | 0.08 |
| E2 | TKW  | 3A | AX.89748517 | 5.34E+08 | 0.13 | -1.36   | 3.06 | 0.05 |
| E2 | GY   | 3A | AX.89465602 | 5.60E+08 | 0.07 | -4.26   | 3.69 | 0.07 |
| E2 | GY   | 3A | AX.89766254 | 5.30E+08 | 0.07 | -4.26   | 3.69 | 0.07 |
| E2 | GY   | 3A | AX.89766254 | 5.30E+08 | 0.07 | -4.26   | 3.69 | 0.07 |
| E2 | GY   | 3A | AX.89514441 | 5.56E+08 | 0.10 | -3.36   | 3.49 | 0.07 |
| E2 | GY   | 3A | AX.89583436 | 5.57E+08 | 0.06 | -4.59   | 3.95 | 0.08 |
| E2 | TKW  | 3A | AX.89611849 | 4.80E+08 | 0.22 | -1.20   | 3.58 | 0.06 |
| E2 | TKW  | 3A | AX.89440050 | 5.32E+08 | 0.15 | -1.32   | 3.33 | 0.06 |
| E2 | GY   | 3A | AX.89487737 | 5.57E+08 | 0.07 | -4.26   | 3.69 | 0.07 |
| E2 | GY   | 3A | AX.89487737 | 5.57E+08 | 0.07 | -4.26   | 3.69 | 0.07 |

|    |      |    |             |          |      |         |      |      |
|----|------|----|-------------|----------|------|---------|------|------|
| E2 | GPM2 | 3A | AX.89624691 | 7.48E+08 | 0.08 | -880.17 | 3.04 | 0.04 |
| E2 | TKW  | 3A | AX.89705426 | 5.34E+08 | 0.17 | -1.20   | 3.02 | 0.05 |
| E2 | GY   | 3A | AX.89393225 | 5.33E+08 | 0.07 | -4.04   | 3.76 | 0.08 |
| E2 | GPM2 | 3A | AX.89594743 | 5.56E+08 | 0.10 | -811.26 | 3.06 | 0.06 |
| E2 | GY   | 3A | AX.89702635 | 5.33E+08 | 0.07 | -4.04   | 3.76 | 0.08 |
| E2 | GPM2 | 3A | AX.89519250 | 7.50E+08 | 0.08 | -880.17 | 3.04 | 0.04 |
| E2 | GPM2 | 3A | AX.89342565 | 7.47E+08 | 0.08 | -880.17 | 3.04 | 0.04 |
| E2 | TKW  | 3A | AX.89561000 | 5.32E+08 | 0.16 | -1.25   | 3.11 | 0.05 |
| E2 | GPM2 | 3A | AX.89652707 | 7.50E+08 | 0.08 | -880.17 | 3.04 | 0.04 |
| E2 | GY   | 3A | AX.89678620 | 5.65E+08 | 0.07 | -4.26   | 3.69 | 0.07 |
| E2 | TKW  | 3A | AX.89723710 | 5.32E+08 | 0.16 | -1.25   | 3.11 | 0.05 |
| E2 | GY   | 3A | AX.89617932 | 5.16E+08 | 0.05 | -4.80   | 3.69 | 0.08 |
| E2 | TKW  | 3A | AX.89315109 | 5.34E+08 | 0.17 | -1.20   | 3.02 | 0.05 |
| E2 | GPM2 | 3A | AX.89683799 | 7.49E+08 | 0.08 | -880.17 | 3.04 | 0.04 |
| E2 | TKW  | 3A | AX.89508575 | 4.44E+08 | 0.24 | -1.17   | 3.64 | 0.06 |
| E2 | TKW  | 3A | AX.89636742 | 5.32E+08 | 0.16 | -1.25   | 3.11 | 0.05 |
| E2 | GY   | 3A | AX.89490471 | 5.59E+08 | 0.07 | -4.26   | 3.69 | 0.07 |
| E2 | GY   | 3A | AX.89638545 | 4.97E+08 | 0.06 | -4.16   | 3.31 | 0.07 |
| E2 | TKW  | 3A | AX.89733534 | 4.80E+08 | 0.22 | -1.20   | 3.58 | 0.06 |
| E2 | TKW  | 3A | AX.89757174 | 5.32E+08 | 0.16 | -1.25   | 3.11 | 0.05 |
| E2 | TKW  | 3A | AX.89319918 | 5.34E+08 | 0.13 | -1.36   | 3.06 | 0.05 |
| E2 | TKW  | 3A | AX.89622363 | 5.34E+08 | 0.17 | -1.20   | 3.02 | 0.05 |
| E2 | GPM2 | 3A | AX.89625333 | 7.47E+08 | 0.08 | -880.17 | 3.04 | 0.04 |
| E2 | GY   | 3A | AX.89677167 | 5.57E+08 | 0.07 | -4.42   | 3.94 | 0.08 |
| E2 | GY   | 3A | AX.89685274 | 5.30E+08 | 0.07 | -4.26   | 3.69 | 0.07 |
| E2 | GY   | 3A | AX.89742858 | 5.29E+08 | 0.07 | -4.26   | 3.69 | 0.07 |
| E2 | GY   | 3A | AX.89742858 | 5.29E+08 | 0.07 | -4.26   | 3.69 | 0.07 |
| E2 | TKW  | 3A | AX.89469040 | 7.44E+08 | 0.36 | -1.00   | 3.35 | 0.06 |
| E2 | GY   | 3A | AX.89731030 | 5.65E+08 | 0.07 | -4.26   | 3.69 | 0.07 |
| E2 | GPM2 | 3A | AX.89563396 | 7.49E+08 | 0.08 | -855.62 | 3.04 | 0.04 |
| E2 | GY   | 3A | AX.89707136 | 5.31E+08 | 0.07 | -4.26   | 3.69 | 0.07 |
| E2 | TKW  | 3A | AX.89750696 | 5.34E+08 | 0.17 | -1.23   | 3.17 | 0.05 |
| E2 | TKW  | 3A | AX.89310434 | 5.32E+08 | 0.16 | -1.25   | 3.11 | 0.05 |
| E2 | GPM2 | 3A | AX.89549417 | 7.47E+08 | 0.08 | -880.17 | 3.04 | 0.04 |
| E2 | GPM2 | 3A | AX.89424933 | 7.48E+08 | 0.08 | -880.17 | 3.04 | 0.04 |
| E2 | TKW  | 3A | AX.89455172 | 5.32E+08 | 0.16 | -1.25   | 3.11 | 0.05 |
| E2 | GY   | 3A | AX.89750593 | 5.33E+08 | 0.07 | -4.26   | 3.69 | 0.07 |
| E2 | TKW  | 3A | AX.89401394 | 5.34E+08 | 0.17 | -1.20   | 3.02 | 0.05 |
| E2 | TKW  | 3A | AX.89364280 | 4.80E+08 | 0.22 | -1.20   | 3.58 | 0.06 |
| E2 | GY   | 3A | AX.89483342 | 5.33E+08 | 0.07 | -4.04   | 3.76 | 0.08 |
| E2 | GPM2 | 3A | AX.89341042 | 7.47E+08 | 0.08 | -880.17 | 3.04 | 0.04 |
| E2 | GY   | 3A | AX.89699679 | 5.62E+08 | 0.07 | -4.15   | 3.71 | 0.07 |
| E2 | GY   | 3A | AX.89699679 | 5.62E+08 | 0.07 | -4.15   | 3.71 | 0.07 |
| E2 | TKW  | 3A | AX.89385976 | 5.32E+08 | 0.16 | -1.25   | 3.11 | 0.05 |
| E2 | GY   | 3A | AX.89722203 | 5.64E+08 | 0.07 | -4.26   | 3.69 | 0.07 |
| E2 | TKW  | 3A | AX.89659664 | 5.34E+08 | 0.17 | -1.20   | 3.02 | 0.05 |
| E2 | TKW  | 3A | AX.89587656 | 7.44E+08 | 0.30 | -1.01   | 3.17 | 0.05 |
| E2 | TKW  | 3A | AX.89777932 | 5.34E+08 | 0.13 | -1.33   | 3.03 | 0.05 |
| E2 | GPM2 | 3A | AX.89394430 | 5.56E+08 | 0.10 | -811.26 | 3.06 | 0.06 |
| E2 | TKW  | 3A | AX.89572200 | 4.80E+08 | 0.24 | -1.25   | 4.04 | 0.07 |

|    |      |    |             |          |      |          |      |      |
|----|------|----|-------------|----------|------|----------|------|------|
| E2 | TKW  | 3A | AX.89441206 | 4.80E+08 | 0.24 | -1.22    | 3.89 | 0.07 |
| E2 | TKW  | 3A | AX.89683357 | 7.44E+08 | 0.30 | -1.05    | 3.37 | 0.06 |
| E2 | GY   | 3A | AX.89690071 | 5.66E+08 | 0.07 | -4.26    | 3.69 | 0.07 |
| E2 | TKW  | 3A | AX.89573974 | 5.34E+08 | 0.17 | -1.20    | 3.02 | 0.05 |
| E2 | GPM2 | 3A | AX.89498962 | 2.02E+07 | 0.05 | -1390.70 | 4.24 | 0.10 |
| E2 | TKW  | 3A | AX.89311054 | 4.80E+08 | 0.22 | -1.20    | 3.58 | 0.06 |
| E2 | TKW  | 3A | AX.89447799 | 5.34E+08 | 0.17 | -1.20    | 3.02 | 0.05 |
| E2 | TKW  | 3A | AX.89643254 | 5.34E+08 | 0.17 | -1.20    | 3.02 | 0.05 |
| E2 | TKW  | 3A | AX.89702901 | 5.34E+08 | 0.17 | -1.20    | 3.02 | 0.05 |
| E2 | GY   | 3A | AX.89675504 | 5.63E+08 | 0.07 | -4.26    | 3.69 | 0.07 |
| E2 | TKW  | 3A | AX.89350488 | 5.62E+08 | 0.16 | -1.21    | 3.02 | 0.05 |
| E2 | GPS  | 3A | AX.89766237 | 6.12E+08 | 0.09 | -2.59    | 3.81 | 0.08 |
| E2 | TKW  | 3A | AX.89619570 | 7.44E+08 | 0.38 | -1.11    | 4.11 | 0.08 |
| E2 | GY   | 3A | AX.89490471 | 5.59E+08 | 0.07 | -4.26    | 3.69 | 0.07 |
| E2 | TKW  | 3A | AX.89765605 | 5.34E+08 | 0.17 | -1.20    | 3.02 | 0.05 |
| E2 | GPM2 | 3A | AX.89311459 | 7.48E+08 | 0.08 | -880.17  | 3.04 | 0.04 |
| E2 | TKW  | 3A | AX.89665785 | 4.80E+08 | 0.23 | -1.19    | 3.68 | 0.06 |
| E2 | GY   | 3A | AX.89778201 | 5.30E+08 | 0.07 | -4.26    | 3.69 | 0.07 |
| E2 | GY   | 3A | AX.89778201 | 5.30E+08 | 0.07 | -4.26    | 3.69 | 0.07 |
| E2 | GY   | 3A | AX.89677167 | 5.57E+08 | 0.07 | -4.42    | 3.94 | 0.08 |
| E2 | TKW  | 3A | AX.89658848 | 4.80E+08 | 0.25 | -1.06    | 3.13 | 0.05 |
| E2 | TKW  | 3A | AX.89433907 | 4.80E+08 | 0.22 | -1.20    | 3.58 | 0.06 |
| E2 | GPM2 | 3A | AX.89628619 | 7.49E+08 | 0.08 | -855.62  | 3.04 | 0.04 |
| E2 | TKW  | 3A | AX.89344911 | 4.80E+08 | 0.22 | -1.20    | 3.58 | 0.06 |
| E2 | TKW  | 3A | AX.89668982 | 5.32E+08 | 0.17 | -1.24    | 3.18 | 0.05 |
| E2 | GY   | 3A | AX.89774966 | 5.33E+08 | 0.07 | -4.04    | 3.76 | 0.08 |
| E2 | TKW  | 3A | AX.89686826 | 5.34E+08 | 0.13 | -1.42    | 3.28 | 0.05 |
| E2 | TKW  | 3A | AX.89375669 | 4.80E+08 | 0.24 | -1.22    | 3.89 | 0.07 |
| E2 | TKW  | 3A | AX.89443841 | 7.44E+08 | 0.30 | -1.05    | 3.37 | 0.06 |
| E2 | TKW  | 3A | AX.89380739 | 4.80E+08 | 0.22 | -1.20    | 3.58 | 0.06 |
| E2 | GY   | 3A | AX.89678620 | 5.65E+08 | 0.07 | -4.26    | 3.69 | 0.07 |
| E2 | TKW  | 3A | AX.89377201 | 5.34E+08 | 0.17 | -1.20    | 3.02 | 0.05 |
| E2 | TKW  | 3A | AX.89669017 | 5.34E+08 | 0.17 | -1.20    | 3.02 | 0.05 |
| E2 | GPM2 | 3A | AX.89617137 | 7.49E+08 | 0.08 | -855.62  | 3.04 | 0.04 |
| E2 | TKW  | 3A | AX.89727232 | 5.34E+08 | 0.17 | -1.20    | 3.02 | 0.05 |
| E2 | GY   | 3A | AX.89750593 | 5.33E+08 | 0.07 | -4.26    | 3.69 | 0.07 |
| E2 | GPM2 | 3A | AX.89603026 | 5.57E+08 | 0.05 | -1346.35 | 4.07 | 0.08 |
| E2 | GPM2 | 3A | AX.89583574 | 7.49E+08 | 0.08 | -880.17  | 3.04 | 0.04 |
| E2 | GPM2 | 3A | AX.89766704 | 7.50E+08 | 0.08 | -880.17  | 3.04 | 0.04 |
| E2 | TKW  | 3A | AX.89556300 | 5.34E+08 | 0.13 | -1.36    | 3.06 | 0.05 |
| E2 | GY   | 3A | AX.89685274 | 5.30E+08 | 0.07 | -4.26    | 3.69 | 0.07 |
| E2 | GY   | 3A | AX.89774966 | 5.33E+08 | 0.07 | -4.04    | 3.76 | 0.08 |
| E2 | GPM2 | 3A | AX.89435419 | 7.50E+08 | 0.08 | -880.17  | 3.04 | 0.04 |
| E2 | TKW  | 3A | AX.89494558 | 7.44E+08 | 0.36 | -0.95    | 3.07 | 0.06 |
| E2 | TKW  | 3A | AX.89533025 | 5.32E+08 | 0.16 | -1.25    | 3.11 | 0.05 |
| E2 | GPM2 | 3A | AX.89461796 | 5.57E+08 | 0.05 | -1346.35 | 4.07 | 0.08 |
| E3 | GPM2 | 3A | AX.89529363 | 1.92E+06 | 0.38 | 902.95   | 3.24 | 0.01 |
| E3 | GPM2 | 3A | AX.89550801 | 1.92E+06 | 0.41 | 851.23   | 3.03 | 0.00 |
| E3 | GPM2 | 3A | AX.89325461 | 1.93E+06 | 0.38 | 914.91   | 3.25 | 0.00 |
| E3 | GPM2 | 3A | AX.89715408 | 6.96E+08 | 0.28 | 942.41   | 3.06 | 0.02 |

|    |      |    |             |          |      |        |      |      |
|----|------|----|-------------|----------|------|--------|------|------|
| E3 | GPM2 | 3A | AX.89418322 | 6.96E+08 | 0.28 | 958.95 | 3.16 | 0.03 |
| E3 | GPM2 | 3A | AX.89569615 | 6.96E+08 | 0.29 | 941.33 | 3.10 | 0.03 |
| E3 | GPM2 | 3A | AX.89374497 | 7.38E+08 | 0.32 | 942.13 | 3.14 | 0.11 |
| E3 | GPS  | 3A | AX.89605667 | 6.03E+08 | 0.07 | -3.78  | 3.01 | 0.04 |
| E3 | GY   | 3A | AX.89622070 | 6.11E+08 | 0.09 | 5.09   | 3.37 | 0.06 |
| E3 | GY   | 3A | AX.89638485 | 6.16E+08 | 0.10 | 4.75   | 3.25 | 0.06 |
| E3 | GY   | 3A | AX.89525214 | 6.29E+08 | 0.27 | 3.25   | 3.21 | 0.03 |
| E3 | GY   | 3A | AX.89647039 | 6.96E+08 | 0.28 | 3.32   | 3.22 | 0.03 |
| E3 | GY   | 3A | AX.89717934 | 6.96E+08 | 0.28 | 3.24   | 3.17 | 0.03 |
| E3 | GY   | 3A | AX.89755163 | 6.96E+08 | 0.27 | 3.37   | 3.41 | 0.03 |
| E3 | GY   | 3A | AX.89551584 | 6.96E+08 | 0.34 | 3.08   | 3.05 | 0.03 |
| E3 | GY   | 3A | AX.89428758 | 6.96E+08 | 0.34 | 3.08   | 3.05 | 0.03 |
| E3 | GY   | 3A | AX.89324452 | 6.96E+08 | 0.26 | 3.23   | 3.12 | 0.03 |
| E3 | GY   | 3A | AX.89379464 | 6.96E+08 | 0.29 | 3.36   | 3.43 | 0.04 |
| E3 | GY   | 3A | AX.89739351 | 6.96E+08 | 0.27 | 3.37   | 3.38 | 0.03 |
| E3 | GY   | 3A | AX.89619067 | 6.96E+08 | 0.27 | 3.37   | 3.38 | 0.03 |
| E3 | GY   | 3A | AX.89723205 | 6.96E+08 | 0.34 | 3.08   | 3.05 | 0.03 |
| E3 | GY   | 3A | AX.89684284 | 6.96E+08 | 0.28 | 3.52   | 3.69 | 0.03 |
| E3 | GY   | 3A | AX.89715408 | 6.96E+08 | 0.28 | 3.53   | 3.74 | 0.03 |
| E3 | GY   | 3A | AX.89353034 | 6.96E+08 | 0.28 | 3.44   | 3.58 | 0.03 |
| E3 | GY   | 3A | AX.89351723 | 6.96E+08 | 0.27 | 3.29   | 3.27 | 0.03 |
| E3 | GY   | 3A | AX.89365774 | 6.96E+08 | 0.28 | 3.25   | 3.33 | 0.03 |
| E3 | GY   | 3A | AX.89418322 | 6.96E+08 | 0.28 | 3.18   | 3.12 | 0.02 |
| E3 | GY   | 3A | AX.89569615 | 6.96E+08 | 0.29 | 3.09   | 3.01 | 0.02 |
| E3 | GY   | 3A | AX.89557559 | 6.97E+08 | 0.08 | 5.35   | 3.16 | 0.02 |
| E3 | GY   | 3A | AX.89552270 | 6.97E+08 | 0.08 | 5.28   | 3.03 | 0.02 |
| E3 | SPM2 | 3A | AX.89776298 | 4.67E+07 | 0.20 | 28.07  | 3.86 | 0.07 |
| E3 | SPM2 | 3A | AX.89456601 | 4.67E+07 | 0.19 | 24.92  | 3.09 | 0.07 |
| E3 | TKW  | 3A | AX.89506498 | 1.50E+06 | 0.46 | 1.01   | 3.86 | 0.01 |
| E3 | TKW  | 3A | AX.89516762 | 1.62E+06 | 0.44 | 1.04   | 3.98 | 0.01 |
| E3 | TKW  | 3A | AX.89334786 | 1.77E+06 | 0.47 | 1.07   | 4.25 | 0.01 |
| E3 | TKW  | 3A | AX.89685817 | 1.77E+06 | 0.43 | 0.96   | 3.47 | 0.01 |
| E3 | TKW  | 3A | AX.89405859 | 1.77E+06 | 0.46 | 1.10   | 4.44 | 0.01 |
| E3 | TKW  | 3A | AX.89680505 | 1.77E+06 | 0.45 | 0.96   | 3.51 | 0.01 |
| E3 | TKW  | 3A | AX.89767528 | 1.78E+06 | 0.46 | 1.04   | 3.99 | 0.01 |
| E3 | TKW  | 3A | AX.89504786 | 1.79E+06 | 0.44 | 1.04   | 4.04 | 0.01 |
| E3 | TKW  | 3A | AX.89656802 | 1.79E+06 | 0.43 | 1.01   | 3.86 | 0.01 |
| E3 | TKW  | 3A | AX.89569283 | 1.80E+06 | 0.44 | 1.07   | 4.20 | 0.01 |
| E3 | TKW  | 3A | AX.89321511 | 1.62E+06 | 0.44 | 1.03   | 3.98 | 0.01 |
| E3 | TKW  | 3A | AX.89434751 | 1.72E+06 | 0.44 | 1.07   | 4.20 | 0.01 |
| E3 | TKW  | 3A | AX.89700949 | 1.72E+06 | 0.44 | 1.07   | 4.20 | 0.01 |
| E3 | TKW  | 3A | AX.89549616 | 1.73E+06 | 0.44 | 1.07   | 4.20 | 0.01 |
| E3 | TKW  | 3A | AX.89462585 | 1.77E+06 | 0.44 | 1.07   | 4.20 | 0.01 |
| E3 | TKW  | 3A | AX.89705177 | 6.54E+08 | 0.22 | 1.02   | 3.12 | 0.04 |
| E3 | TKW  | 3A | AX.89501481 | 6.54E+08 | 0.22 | 1.02   | 3.12 | 0.04 |
| E3 | TKW  | 3A | AX.89360854 | 1.80E+06 | 0.44 | 1.07   | 4.20 | 0.01 |
| E3 | TKW  | 3A | AX.89418185 | 1.82E+06 | 0.35 | 0.94   | 3.45 | 0.01 |
| E3 | TKW  | 3A | AX.89558129 | 1.89E+06 | 0.44 | 1.10   | 4.37 | 0.01 |
| E3 | TKW  | 3A | AX.89772408 | 1.89E+06 | 0.44 | 1.08   | 4.30 | 0.01 |
| E3 | TKW  | 3A | AX.89621737 | 1.90E+06 | 0.45 | 1.10   | 4.42 | 0.01 |

|    |      |    |               |          |      |         |      |      |
|----|------|----|---------------|----------|------|---------|------|------|
| E3 | TKW  | 3A | AX.89529363   | 1.92E+06 | 0.38 | -1.23   | 5.62 | 0.02 |
| E3 | TKW  | 3A | AX.89550801   | 1.92E+06 | 0.41 | -1.03   | 4.25 | 0.01 |
| E3 | TKW  | 3A | AX.89685524   | 1.93E+06 | 0.49 | 1.08    | 4.24 | 0.01 |
| E3 | TKW  | 3A | AX.89325461   | 1.93E+06 | 0.38 | -1.18   | 5.12 | 0.01 |
| E3 | TKW  | 3A | AX.89649744   | 1.93E+06 | 0.48 | 1.10    | 4.36 | 0.01 |
| E3 | TKW  | 3A | AX.89601427   | 6.45E+06 | 0.28 | 0.94    | 3.04 | 0.00 |
| E3 | TKW  | 3A | AX.89769205   | 6.90E+06 | 0.27 | 0.96    | 3.01 | 0.00 |
| E3 | TKW  | 3A | AX.89341270   | 6.90E+06 | 0.27 | 0.96    | 3.01 | 0.00 |
| E3 | TKW  | 3A | X.89626769_OT | 1.25E+07 | 0.15 | -1.20   | 3.37 | 0.04 |
| E3 | TKW  | 3A | AX.89471146   | 1.25E+07 | 0.13 | -1.23   | 3.23 | 0.04 |
| E3 | TKW  | 3A | AX.89769379   | 6.54E+08 | 0.21 | 1.00    | 3.04 | 0.03 |
| E3 | TKW  | 3A | AX.89724432   | 6.54E+08 | 0.20 | 1.05    | 3.22 | 0.03 |
| E3 | TKW  | 3A | AX.89382845   | 6.54E+08 | 0.21 | 1.00    | 3.03 | 0.03 |
| E3 | TKW  | 3A | X.89769143_OT | 4.41E+05 | 0.26 | 0.97    | 3.32 | 0.00 |
| E3 | TKW  | 3A | X.89668298_OT | 5.41E+05 | 0.34 | 0.95    | 3.49 | 0.00 |
| E3 | TKW  | 3A | X.89714989_OT | 6.80E+05 | 0.27 | 0.96    | 3.10 | 0.00 |
| E4 | GPS  | 3A | AX.89718553   | 1.57E+07 | 0.30 | 1.63    | 3.16 | 0.06 |
| E4 | GPS  | 3A | AX.89469818   | 1.57E+07 | 0.30 | 1.66    | 3.28 | 0.06 |
| E4 | GPS  | 3A | AX.89323020   | 2.25E+07 | 0.38 | -1.51   | 3.08 | 0.07 |
| E4 | GPS  | 3A | AX.89717553   | 6.42E+08 | 0.20 | 2.02    | 3.41 | 0.08 |
| E4 | GPS  | 3A | AX.89717642   | 6.42E+08 | 0.20 | 2.02    | 3.41 | 0.08 |
| E4 | GPS  | 3A | AX.89369930   | 6.42E+08 | 0.20 | 2.02    | 3.41 | 0.08 |
| E4 | GPM2 | 3A | AX.89506498   | 1.50E+06 | 0.46 | -464.48 | 3.10 | 0.01 |
| E4 | GPM2 | 3A | AX.89357239   | 1.52E+06 | 0.38 | -442.70 | 3.03 | 0.01 |
| E4 | GPM2 | 3A | AX.89529363   | 1.92E+06 | 0.38 | 476.28  | 3.32 | 0.01 |
| E4 | GPM2 | 3A | AX.89733345   | 2.45E+07 | 0.07 | 856.00  | 3.39 | 0.06 |
| E4 | GPM2 | 3A | AX.89744434   | 1.34E+08 | 0.06 | 921.43  | 3.02 | 0.02 |
| E4 | GPM2 | 3A | AX.89679638   | 1.34E+08 | 0.06 | 921.43  | 3.02 | 0.02 |
| E4 | GPM2 | 3A | AX.89459928   | 1.35E+08 | 0.06 | 921.43  | 3.02 | 0.02 |
| E4 | GPS  | 3A | AX.89678665   | 2.25E+07 | 0.38 | -1.51   | 3.08 | 0.07 |
| E4 | GPS  | 3A | AX.89457595   | 2.25E+07 | 0.39 | -1.57   | 3.33 | 0.07 |
| E4 | GPS  | 3A | AX.89742220   | 2.25E+07 | 0.35 | -1.56   | 3.17 | 0.07 |
| E4 | GPM2 | 3A | AX.89598114   | 6.58E+08 | 0.08 | -895.58 | 3.95 | 0.06 |
| E4 | GPM2 | 3A | AX.89639531   | 6.58E+08 | 0.07 | -875.88 | 3.26 | 0.05 |
| E4 | GPM2 | 3A | AX.89747164   | 1.36E+08 | 0.06 | 921.43  | 3.02 | 0.02 |
| E4 | GPM2 | 3A | AX.89434162   | 1.36E+08 | 0.06 | 921.43  | 3.02 | 0.02 |
| E4 | GPM2 | 3A | AX.89771465   | 1.36E+08 | 0.06 | 921.43  | 3.02 | 0.02 |
| E4 | GPM2 | 3A | AX.89717877   | 1.36E+08 | 0.06 | 921.43  | 3.02 | 0.02 |
| E4 | GPM2 | 3A | AX.89366281   | 1.36E+08 | 0.06 | 921.43  | 3.02 | 0.02 |
| E4 | GPM2 | 3A | AX.89743592   | 1.36E+08 | 0.06 | 891.96  | 3.00 | 0.02 |
| E4 | GPM2 | 3A | AX.89748917   | 1.36E+08 | 0.06 | 921.43  | 3.02 | 0.02 |
| E4 | GPM2 | 3A | AX.89512318   | 1.36E+08 | 0.06 | 891.96  | 3.00 | 0.02 |
| E4 | GPM2 | 3A | AX.89646454   | 1.38E+08 | 0.06 | 921.43  | 3.02 | 0.02 |
| E4 | GPM2 | 3A | AX.89317972   | 1.38E+08 | 0.06 | 921.43  | 3.02 | 0.02 |
| E4 | GPM2 | 3A | AX.89509387   | 1.40E+08 | 0.05 | 981.94  | 3.18 | 0.03 |
| E4 | GPM2 | 3A | AX.89672074   | 1.40E+08 | 0.06 | 891.96  | 3.00 | 0.02 |
| E4 | GPM2 | 3A | AX.89584929   | 1.41E+08 | 0.05 | 981.94  | 3.18 | 0.03 |
| E4 | GPM2 | 3A | AX.89720290   | 1.42E+08 | 0.05 | 981.94  | 3.18 | 0.03 |
| E4 | GPM2 | 3A | AX.89440007   | 1.42E+08 | 0.05 | 981.94  | 3.18 | 0.03 |
| E4 | GPM2 | 3A | AX.89734062   | 1.43E+08 | 0.06 | 921.43  | 3.02 | 0.02 |



|    |      |    |               |          |      |         |      |      |
|----|------|----|---------------|----------|------|---------|------|------|
| E4 | GPM2 | 3A | X.89693520_OT | 6.57E+08 | 0.07 | -898.80 | 3.52 | 0.06 |
| E4 | GPM2 | 3A | AX.89580465   | 6.58E+08 | 0.10 | -818.80 | 4.24 | 0.06 |
| E4 | GPM2 | 3A | AX.89597120   | 6.58E+08 | 0.11 | -826.70 | 4.41 | 0.07 |
| E4 | GPM2 | 3A | AX.89412937   | 6.58E+08 | 0.07 | -919.26 | 3.67 | 0.06 |
| E4 | GPM2 | 3A | AX.89573930   | 6.58E+08 | 0.08 | -816.44 | 3.59 | 0.06 |
| E4 | GY   | 3A | AX.89706784   | 6.93E+07 | 0.10 | 2.44    | 3.04 | 0.04 |
| E4 | GY   | 3A | AX.89599548   | 6.93E+07 | 0.10 | 2.44    | 3.04 | 0.04 |
| E4 | GY   | 3A | AX.89375712   | 7.23E+07 | 0.09 | 2.91    | 3.96 | 0.06 |
| E4 | GY   | 3A | AX.89498050   | 6.54E+07 | 0.08 | 2.75    | 3.31 | 0.05 |
| E4 | GY   | 3A | AX.89687145   | 6.62E+07 | 0.09 | 2.47    | 3.00 | 0.04 |
| E4 | GY   | 3A | AX.89451561   | 6.73E+07 | 0.09 | 2.91    | 3.77 | 0.05 |
| E4 | GY   | 3A | AX.89382999   | 6.74E+07 | 0.08 | 2.80    | 3.42 | 0.05 |
| E4 | GY   | 3A | AX.89744495   | 6.74E+07 | 0.09 | 2.53    | 3.05 | 0.04 |
| E4 | GY   | 3A | AX.89426500   | 7.23E+07 | 0.09 | 2.91    | 3.96 | 0.06 |
| E4 | GY   | 3A | AX.89669526   | 7.35E+07 | 0.09 | 2.70    | 3.34 | 0.05 |
| E4 | GY   | 3A | AX.89317931   | 7.40E+07 | 0.09 | 2.70    | 3.34 | 0.05 |
| E4 | GY   | 3A | X.89430743_OT | 7.46E+07 | 0.16 | -2.10   | 3.40 | 0.05 |
| E4 | GY   | 3A | AX.89747308   | 6.93E+07 | 0.10 | 2.44    | 3.04 | 0.04 |
| E4 | GY   | 3A | AX.89380711   | 6.95E+07 | 0.10 | 2.44    | 3.04 | 0.04 |
| E4 | GY   | 3A | AX.89742909   | 6.95E+07 | 0.10 | 2.44    | 3.04 | 0.04 |
| E4 | GY   | 3A | AX.89325624   | 6.95E+07 | 0.10 | 2.44    | 3.04 | 0.04 |
| E4 | GY   | 3A | AX.89441160   | 6.96E+07 | 0.09 | 2.74    | 3.50 | 0.05 |
| E4 | GY   | 3A | AX.89406939   | 7.07E+07 | 0.08 | 2.96    | 3.78 | 0.05 |
| E4 | GY   | 3A | AX.89678198   | 7.18E+07 | 0.09 | 2.76    | 3.53 | 0.05 |
| E4 | GY   | 3A | AX.89464147   | 7.18E+07 | 0.09 | 2.91    | 3.96 | 0.06 |
| E4 | SPM2 | 3A | AX.89315209   | 1.24E+07 | 0.28 | 17.86   | 3.09 | 0.05 |
| E4 | SPM2 | 3A | AX.89718553   | 1.57E+07 | 0.30 | -19.41  | 3.62 | 0.07 |
| E4 | SPM2 | 3A | X.89652010_OT | 9.47E+06 | 0.16 | 22.27   | 3.37 | 0.04 |
| E4 | SPM2 | 3A | AX.89365659   | 1.17E+07 | 0.47 | 16.80   | 3.17 | 0.04 |
| E4 | SPM2 | 3A | AX.89450866   | 1.18E+07 | 0.47 | 17.16   | 3.28 | 0.04 |
| E4 | SPM2 | 3A | AX.89469818   | 1.57E+07 | 0.30 | -18.98  | 3.49 | 0.06 |
| E4 | SPM2 | 3A | X.89692579_OT | 7.11E+08 | 0.08 | 29.12   | 3.31 | 0.05 |
| E4 | SPM2 | 3A | X.89396933_OT | 7.11E+08 | 0.09 | 28.03   | 3.13 | 0.07 |
| E4 | SPM2 | 3A | X.89440178_OT | 7.11E+08 | 0.09 | 28.03   | 3.13 | 0.07 |
| E4 | SPM2 | 3A | X.89433732_OT | 7.11E+08 | 0.09 | 28.03   | 3.13 | 0.07 |
| E4 | SPM2 | 3A | AX.89424818   | 7.26E+08 | 0.16 | -23.20  | 3.45 | 0.06 |
| E4 | GY   | 3A | AX.89580465   | 6.58E+08 | 0.11 | -2.48   | 3.58 | 0.05 |
| E4 | GY   | 3A | AX.89597120   | 6.58E+08 | 0.11 | -2.57   | 3.90 | 0.06 |
| E4 | GY   | 3A | AX.89573930   | 6.58E+08 | 0.09 | -2.50   | 3.12 | 0.05 |
| E4 | GY   | 3A | AX.89598114   | 6.58E+08 | 0.08 | -2.68   | 3.32 | 0.05 |
| E4 | TKW  | 3A | AX.89529363   | 1.92E+06 | 0.38 | -0.90   | 3.39 | 0.01 |
| E4 | TKW  | 3A | AX.89410293   | 6.33E+08 | 0.26 | -0.96   | 3.24 | 0.00 |
| E4 | TKW  | 3A | AX.89444445   | 6.33E+08 | 0.26 | -0.96   | 3.24 | 0.00 |
| E4 | TKW  | 3A | AX.89488313   | 6.33E+08 | 0.26 | -0.96   | 3.24 | 0.00 |
| E4 | TKW  | 3A | AX.89486391   | 6.33E+08 | 0.26 | -0.96   | 3.24 | 0.00 |
| E4 | TKW  | 3A | AX.89657477   | 6.33E+08 | 0.26 | -0.96   | 3.24 | 0.00 |
| E4 | TKW  | 3A | AX.89770721   | 6.33E+08 | 0.27 | -0.94   | 3.13 | 0.00 |
| E4 | TKW  | 3A | AX.89324391   | 6.33E+08 | 0.26 | -0.96   | 3.24 | 0.00 |
| E4 | TKW  | 3A | AX.89361167   | 6.33E+08 | 0.26 | -0.96   | 3.24 | 0.00 |
| E4 | TKW  | 3A | AX.89381089   | 6.33E+08 | 0.26 | -0.96   | 3.27 | 0.00 |

|    |      |    |             |          |      |        |      |      |
|----|------|----|-------------|----------|------|--------|------|------|
| E4 | TKW  | 3A | AX.89569699 | 6.33E+08 | 0.26 | -0.97  | 3.34 | 0.00 |
| E4 | TKW  | 3A | AX.89660874 | 6.34E+08 | 0.26 | -0.93  | 3.10 | 0.00 |
| E4 | TKW  | 3A | AX.89535418 | 6.34E+08 | 0.27 | -0.96  | 3.34 | 0.00 |
| E4 | TKW  | 3A | AX.89329608 | 6.34E+08 | 0.26 | -0.97  | 3.34 | 0.00 |
| E4 | TKW  | 3A | AX.89597484 | 6.34E+08 | 0.26 | -0.97  | 3.34 | 0.00 |
| E4 | TKW  | 3A | AX.89762611 | 6.34E+08 | 0.26 | -0.97  | 3.34 | 0.00 |
| E4 | TKW  | 3A | AX.89556790 | 6.34E+08 | 0.26 | -0.97  | 3.34 | 0.00 |
| E4 | TKW  | 3A | AX.89696155 | 6.34E+08 | 0.26 | -0.97  | 3.34 | 0.00 |
| E4 | TKW  | 3A | AX.89697826 | 6.35E+08 | 0.26 | -0.97  | 3.34 | 0.00 |
| E1 | GY   | 3B | AX.89585986 | 7.83E+08 | 0.15 | -4.14  | 4.81 | 0.08 |
| E1 | GY   | 3B | AX.89675055 | 2.27E+07 | 0.20 | -3.24  | 3.79 | 0.06 |
| E1 | SPM2 | 3B | AX.89403382 | 8.00E+08 | 0.40 | -20.13 | 4.23 | 0.08 |
| E1 | GY   | 3B | AX.89676377 | 2.36E+08 | 0.08 | 4.32   | 3.20 | 0.05 |
| E1 | SPM2 | 3B | AX.89644519 | 8.00E+08 | 0.44 | -18.45 | 3.73 | 0.06 |
| E1 | GY   | 3B | AX.89335703 | 1.03E+07 | 0.30 | -2.72  | 3.57 | 0.06 |
| E1 | GY   | 3B | AX.89318080 | 1.71E+07 | 0.42 | 2.46   | 3.42 | 0.06 |
| E1 | GY   | 3B | AX.89376995 | 1.21E+08 | 0.09 | 3.91   | 3.06 | 0.05 |
| E1 | GY   | 3B | AX.89376995 | 1.21E+08 | 0.09 | 3.91   | 3.06 | 0.05 |
| E1 | SPM2 | 3B | AX.89480220 | 8.00E+08 | 0.40 | -20.13 | 4.23 | 0.08 |
| E1 | GY   | 3B | AX.89386142 | 1.61E+07 | 0.26 | 2.63   | 3.11 | 0.04 |
| E1 | GY   | 3B | AX.89386142 | 1.61E+07 | 0.26 | 2.63   | 3.11 | 0.04 |
| E1 | GY   | 3B | AX.89559462 | 7.06E+07 | 0.09 | 3.90   | 3.05 | 0.05 |
| E1 | GY   | 3B | AX.89524737 | 4.48E+08 | 0.11 | 3.81   | 3.37 | 0.06 |
| E1 | SPM2 | 3B | AX.89552994 | 8.00E+08 | 0.44 | -18.45 | 3.73 | 0.06 |
| E1 | GY   | 3B | AX.89559462 | 7.06E+07 | 0.09 | 3.90   | 3.05 | 0.05 |
| E1 | GY   | 3B | AX.89449959 | 2.25E+08 | 0.08 | 4.32   | 3.20 | 0.05 |
| E1 | GY   | 3B | AX.89376983 | 2.03E+08 | 0.08 | 4.12   | 3.08 | 0.05 |
| E1 | SPM2 | 3B | AX.89634380 | 8.00E+08 | 0.40 | -20.13 | 4.23 | 0.08 |
| E1 | GY   | 3B | AX.89764741 | 2.15E+08 | 0.07 | 4.99   | 3.71 | 0.06 |
| E1 | GY   | 3B | AX.89376983 | 2.03E+08 | 0.08 | 4.12   | 3.08 | 0.05 |
| E1 | SPM2 | 3B | AX.89715464 | 7.40E+08 | 0.40 | -17.71 | 3.40 | 0.06 |
| E1 | SPM2 | 3B | AX.86168525 | 8.00E+08 | 0.40 | -20.13 | 4.23 | 0.08 |
| E1 | SPM2 | 3B | AX.89767393 | 8.03E+08 | 0.39 | -21.32 | 4.64 | 0.08 |
| E1 | SPM2 | 3B | AX.89647841 | 7.99E+08 | 0.44 | -18.48 | 3.73 | 0.06 |
| E1 | GY   | 3B | AX.89396277 | 1.03E+07 | 0.29 | -2.74  | 3.55 | 0.06 |
| E1 | GY   | 3B | AX.89524737 | 4.48E+08 | 0.11 | 3.81   | 3.37 | 0.06 |
| E1 | GY   | 3B | AX.89597884 | 1.61E+07 | 0.34 | 2.63   | 3.59 | 0.05 |
| E1 | GY   | 3B | AX.89386944 | 2.03E+08 | 0.07 | 4.53   | 3.31 | 0.06 |
| E1 | SPM2 | 3B | AX.89531838 | 7.99E+08 | 0.44 | -18.45 | 3.73 | 0.06 |
| E1 | SPM2 | 3B | AX.89422216 | 8.01E+08 | 0.41 | -20.67 | 4.47 | 0.08 |
| E1 | GY   | 3B | AX.89450012 | 7.81E+08 | 0.49 | 3.03   | 5.04 | 0.10 |
| E1 | SPM2 | 3B | AX.89717951 | 8.04E+08 | 0.35 | -20.79 | 4.28 | 0.08 |
| E1 | GY   | 3B | AX.89450012 | 7.81E+08 | 0.49 | 3.03   | 5.04 | 0.10 |
| E1 | GY   | 3B | AX.89731729 | 1.59E+07 | 0.33 | 2.95   | 4.32 | 0.07 |
| E1 | GY   | 3B | AX.89669218 | 2.05E+07 | 0.26 | -2.68  | 3.20 | 0.05 |
| E1 | GY   | 3B | AX.89600688 | 2.04E+08 | 0.07 | 4.53   | 3.31 | 0.06 |
| E1 | SPM2 | 3B | AX.89439005 | 7.99E+08 | 0.44 | -18.48 | 3.73 | 0.06 |
| E1 | SPM2 | 3B | AX.89388184 | 8.01E+08 | 0.43 | -19.35 | 4.02 | 0.07 |
| E1 | SPM2 | 3B | AX.89725141 | 8.03E+08 | 0.39 | -21.00 | 4.53 | 0.08 |
| E1 | SPM2 | 3B | AX.89468697 | 7.99E+08 | 0.45 | -19.21 | 4.00 | 0.07 |

|    |      |    |             |          |      |        |      |      |
|----|------|----|-------------|----------|------|--------|------|------|
| E1 | GY   | 3B | AX.89465739 | 7.82E+08 | 0.37 | -2.74  | 3.98 | 0.07 |
| E1 | GY   | 3B | AX.89312853 | 3.06E+08 | 0.09 | 4.00   | 3.06 | 0.05 |
| E1 | SPM2 | 3B | AX.89736860 | 8.03E+08 | 0.39 | -21.00 | 4.53 | 0.08 |
| E1 | SPM2 | 3B | AX.89735403 | 7.99E+08 | 0.44 | -18.48 | 3.73 | 0.06 |
| E1 | SPM2 | 3B | AX.89488780 | 8.04E+08 | 0.43 | -19.78 | 4.18 | 0.07 |
| E1 | GY   | 3B | AX.89475327 | 1.06E+07 | 0.46 | 2.37   | 3.28 | 0.05 |
| E1 | SPM2 | 3B | AX.89390128 | 8.00E+08 | 0.40 | -20.13 | 4.23 | 0.08 |
| E1 | SPM2 | 3B | AX.89741308 | 7.99E+08 | 0.44 | -18.48 | 3.73 | 0.06 |
| E1 | GY   | 3B | AX.89593712 | 7.81E+08 | 0.46 | 3.18   | 5.46 | 0.11 |
| E1 | GY   | 3B | AX.89460074 | 5.56E+08 | 0.23 | -2.73  | 3.10 | 0.05 |
| E1 | GY   | 3B | AX.89735575 | 7.93E+07 | 0.09 | 3.90   | 3.05 | 0.05 |
| E1 | SPM2 | 3B | AX.89644568 | 7.99E+08 | 0.40 | -20.13 | 4.23 | 0.08 |
| E1 | SPM2 | 3B | AX.89661483 | 8.04E+08 | 0.38 | -21.19 | 4.57 | 0.08 |
| E1 | SPM2 | 3B | AX.89775761 | 8.00E+08 | 0.40 | -20.13 | 4.23 | 0.08 |
| E1 | SPM2 | 3B | AX.89692155 | 8.03E+08 | 0.39 | -21.00 | 4.53 | 0.08 |
| E1 | SPM2 | 3B | AX.89605900 | 7.99E+08 | 0.40 | -20.13 | 4.23 | 0.08 |
| E1 | GY   | 3B | AX.89318080 | 1.71E+07 | 0.42 | 2.46   | 3.42 | 0.06 |
| E1 | GY   | 3B | AX.89447307 | 9.06E+06 | 0.36 | 2.89   | 4.34 | 0.07 |
| E1 | SPM2 | 3B | AX.89549816 | 8.01E+08 | 0.45 | -18.02 | 3.59 | 0.06 |
| E1 | SPM2 | 3B | AX.89775805 | 8.03E+08 | 0.39 | -21.08 | 4.55 | 0.08 |
| E1 | SPM2 | 3B | AX.89331809 | 4.04E+07 | 0.31 | 17.79  | 3.08 | 0.05 |
| E1 | SPM2 | 3B | AX.89421080 | 7.99E+08 | 0.39 | -20.20 | 4.24 | 0.08 |
| E1 | SPM2 | 3B | AX.89427569 | 8.01E+08 | 0.40 | -20.13 | 4.23 | 0.08 |
| E1 | SPM2 | 3B | AX.89681718 | 8.03E+08 | 0.39 | -21.00 | 4.53 | 0.08 |
| E1 | SPM2 | 3B | AX.89501826 | 8.03E+08 | 0.39 | -21.00 | 4.53 | 0.08 |
| E1 | SPM2 | 3B | AX.89442641 | 8.03E+08 | 0.43 | -19.35 | 4.02 | 0.07 |
| E1 | SPM2 | 3B | AX.89332425 | 8.03E+08 | 0.43 | -19.35 | 4.02 | 0.07 |
| E1 | GY   | 3B | AX.89520965 | 7.84E+08 | 0.46 | -2.75  | 4.21 | 0.07 |
| E1 | SPM2 | 3B | AX.89573638 | 7.99E+08 | 0.40 | -20.13 | 4.23 | 0.08 |
| E1 | SPM2 | 3B | AX.86167776 | 8.03E+08 | 0.43 | -20.11 | 4.31 | 0.08 |
| E1 | GY   | 3B | AX.89333525 | 5.45E+08 | 0.27 | -2.61  | 3.13 | 0.06 |
| E1 | GY   | 3B | AX.89459497 | 2.33E+07 | 0.21 | -3.19  | 3.85 | 0.06 |
| E1 | GY   | 3B | AX.89447307 | 9.06E+06 | 0.36 | 2.89   | 4.34 | 0.07 |
| E1 | SPM2 | 3B | AX.89532013 | 8.00E+08 | 0.39 | -20.20 | 4.24 | 0.08 |
| E1 | GY   | 3B | AX.89520965 | 7.84E+08 | 0.46 | -2.75  | 4.21 | 0.07 |
| E1 | SPM2 | 3B | AX.89539699 | 2.29E+07 | 0.20 | 22.78  | 3.62 | 0.06 |
| E1 | GY   | 3B | AX.89316012 | 7.82E+08 | 0.38 | -2.70  | 3.91 | 0.07 |
| E1 | GY   | 3B | AX.89377431 | 7.83E+08 | 0.08 | -4.26  | 3.26 | 0.05 |
| E1 | SPM2 | 3B | AX.86168523 | 8.00E+08 | 0.44 | -18.48 | 3.73 | 0.06 |
| E1 | GY   | 3B | AX.86168705 | 1.52E+07 | 0.33 | 2.70   | 3.72 | 0.06 |
| E1 | SPM2 | 3B | AX.89419189 | 8.04E+08 | 0.35 | -21.53 | 4.57 | 0.08 |
| E1 | GY   | 3B | AX.89383104 | 7.82E+08 | 0.48 | 2.46   | 3.49 | 0.07 |
| E1 | GY   | 3B | AX.89412494 | 5.51E+08 | 0.09 | -5.01  | 4.52 | 0.07 |
| E1 | GY   | 3B | AX.89634987 | 5.87E+08 | 0.30 | -2.69  | 3.54 | 0.07 |
| E1 | SPM2 | 3B | AX.89504457 | 7.99E+08 | 0.40 | -20.13 | 4.23 | 0.08 |
| E1 | GY   | 3B | AX.89483101 | 2.34E+07 | 0.21 | -3.19  | 3.85 | 0.06 |
| E1 | GY   | 3B | AX.89380994 | 7.18E+07 | 0.09 | 3.90   | 3.05 | 0.05 |
| E1 | SPM2 | 3B | AX.89512704 | 8.00E+08 | 0.39 | -20.20 | 4.24 | 0.08 |
| E1 | SPM2 | 3B | AX.89381297 | 8.00E+08 | 0.44 | -18.45 | 3.73 | 0.06 |
| E1 | GY   | 3B | AX.89312632 | 4.05E+07 | 0.10 | 3.95   | 3.35 | 0.06 |

|    |      |    |             |          |      |        |      |      |
|----|------|----|-------------|----------|------|--------|------|------|
| E1 | SPM2 | 3B | AX.89519904 | 8.00E+08 | 0.40 | -20.13 | 4.23 | 0.08 |
| E1 | SPM2 | 3B | AX.89563480 | 8.00E+08 | 0.44 | -18.45 | 3.73 | 0.06 |
| E1 | GY   | 3B | AX.89317109 | 7.01E+07 | 0.09 | 3.90   | 3.05 | 0.05 |
| E1 | GY   | 3B | AX.89497934 | 4.48E+08 | 0.12 | 3.75   | 3.37 | 0.06 |
| E1 | SPM2 | 3B | AX.89749034 | 4.02E+07 | 0.31 | 17.79  | 3.08 | 0.05 |
| E1 | SPM2 | 3B | AX.89521658 | 8.04E+08 | 0.38 | -19.61 | 3.99 | 0.07 |
| E1 | SPM2 | 3B | AX.89436691 | 8.03E+08 | 0.39 | -21.32 | 4.64 | 0.08 |
| E1 | GY   | 3B | AX.89313026 | 4.47E+08 | 0.12 | 3.52   | 3.11 | 0.05 |
| E1 | GY   | 3B | AX.89561688 | 4.47E+08 | 0.12 | 3.52   | 3.11 | 0.05 |
| E1 | GY   | 3B | AX.89388524 | 1.03E+07 | 0.30 | -2.72  | 3.57 | 0.06 |
| E1 | SPM2 | 3B | AX.86167774 | 8.03E+08 | 0.42 | -19.39 | 4.02 | 0.07 |
| E1 | SPM2 | 3B | AX.89513284 | 7.99E+08 | 0.40 | -19.41 | 3.98 | 0.07 |
| E1 | SPM2 | 3B | AX.89562717 | 8.01E+08 | 0.40 | -20.88 | 4.52 | 0.08 |
| E1 | SPM2 | 3B | AX.89341812 | 2.25E+07 | 0.48 | 17.72  | 3.50 | 0.07 |
| E1 | SPM2 | 3B | AX.89734728 | 8.01E+08 | 0.40 | -20.13 | 4.23 | 0.08 |
| E1 | GY   | 3B | AX.89760382 | 1.25E+08 | 0.10 | 4.02   | 3.34 | 0.06 |
| E1 | SPM2 | 3B | AX.89392017 | 4.03E+07 | 0.31 | 17.79  | 3.08 | 0.05 |
| E1 | SPM2 | 3B | AX.89453189 | 7.99E+08 | 0.40 | -20.13 | 4.23 | 0.08 |
| E1 | GY   | 3B | AX.89764741 | 2.15E+08 | 0.07 | 4.99   | 3.71 | 0.06 |
| E1 | GY   | 3B | AX.89500234 | 4.52E+08 | 0.12 | 3.56   | 3.08 | 0.05 |
| E1 | GY   | 3B | AX.89500234 | 4.52E+08 | 0.12 | 3.56   | 3.08 | 0.05 |
| E1 | SPM2 | 3B | AX.89622338 | 8.01E+08 | 0.44 | -19.24 | 4.01 | 0.07 |
| E1 | SPM2 | 3B | AX.89651127 | 8.00E+08 | 0.44 | -18.48 | 3.73 | 0.06 |
| E1 | SPM2 | 3B | AX.89365302 | 8.01E+08 | 0.43 | -19.40 | 4.04 | 0.07 |
| E1 | GY   | 3B | AX.89449959 | 2.25E+08 | 0.08 | 4.32   | 3.20 | 0.05 |
| E1 | GY   | 3B | AX.89593554 | 7.01E+07 | 0.09 | 3.90   | 3.05 | 0.05 |
| E1 | GY   | 3B | AX.89371943 | 4.99E+08 | 0.43 | -2.38  | 3.26 | 0.05 |
| E1 | GY   | 3B | AX.89554686 | 4.52E+08 | 0.12 | 3.56   | 3.08 | 0.05 |
| E1 | SPM2 | 3B | AX.89338600 | 7.99E+08 | 0.39 | -20.20 | 4.24 | 0.08 |
| E1 | SPM2 | 3B | AX.89543388 | 8.04E+08 | 0.38 | -21.19 | 4.57 | 0.08 |
| E1 | SPM2 | 3B | AX.89700247 | 8.04E+08 | 0.38 | -21.19 | 4.57 | 0.08 |
| E1 | GY   | 3B | AX.89314692 | 2.46E+07 | 0.28 | -2.64  | 3.28 | 0.05 |
| E1 | SPM2 | 3B | AX.89451096 | 7.99E+08 | 0.40 | -20.13 | 4.23 | 0.08 |
| E1 | GY   | 3B | AX.89348709 | 4.08E+07 | 0.11 | 3.64   | 3.00 | 0.05 |
| E1 | GY   | 3B | AX.89701327 | 7.82E+08 | 0.36 | -2.58  | 3.55 | 0.06 |
| E1 | GY   | 3B | AX.89775197 | 7.83E+08 | 0.48 | 2.46   | 3.49 | 0.07 |
| E1 | SPM2 | 3B | AX.89586004 | 8.04E+08 | 0.38 | -20.34 | 4.25 | 0.08 |
| E1 | SPM2 | 3B | AX.89643156 | 5.81E+08 | 0.44 | -18.45 | 3.73 | 0.06 |
| E1 | GY   | 3B | AX.89311864 | 4.49E+08 | 0.12 | 3.52   | 3.11 | 0.05 |
| E1 | SPM2 | 3B | AX.89503564 | 8.03E+08 | 0.39 | -21.08 | 4.55 | 0.08 |
| E1 | SPM2 | 3B | AX.89404122 | 8.03E+08 | 0.39 | -21.00 | 4.53 | 0.08 |
| E1 | SPM2 | 3B | AX.89456160 | 8.00E+08 | 0.40 | -20.84 | 4.49 | 0.08 |
| E1 | SPM2 | 3B | AX.89583092 | 8.03E+08 | 0.43 | -19.35 | 4.02 | 0.07 |
| E1 | GY   | 3B | AX.89669218 | 2.05E+07 | 0.26 | -2.68  | 3.20 | 0.05 |
| E1 | GY   | 3B | AX.89366224 | 1.10E+07 | 0.43 | -2.35  | 3.18 | 0.05 |
| E1 | GY   | 3B | AX.89312632 | 4.05E+07 | 0.10 | 3.95   | 3.35 | 0.06 |
| E1 | SPM2 | 3B | AX.89498579 | 8.01E+08 | 0.44 | -18.45 | 3.73 | 0.06 |
| E1 | GY   | 3B | AX.89328273 | 7.81E+08 | 0.46 | 3.18   | 5.46 | 0.11 |
| E1 | GY   | 3B | AX.89485267 | 2.68E+08 | 0.10 | 3.81   | 3.15 | 0.05 |
| E1 | GY   | 3B | AX.89394006 | 2.40E+08 | 0.08 | 4.17   | 3.14 | 0.05 |

|    |      |    |             |          |      |        |      |      |
|----|------|----|-------------|----------|------|--------|------|------|
| E1 | GY   | 3B | AX.89394006 | 2.40E+08 | 0.08 | 4.17   | 3.14 | 0.05 |
| E1 | GY   | 3B | AX.89597884 | 1.61E+07 | 0.34 | 2.63   | 3.59 | 0.05 |
| E1 | GY   | 3B | AX.89398767 | 7.04E+07 | 0.09 | 3.90   | 3.05 | 0.05 |
| E1 | SPM2 | 3B | AX.89579562 | 8.00E+08 | 0.40 | -20.13 | 4.23 | 0.08 |
| E1 | GY   | 3B | AX.89707408 | 4.98E+08 | 0.44 | -2.27  | 3.03 | 0.05 |
| E1 | GY   | 3B | AX.89528591 | 4.09E+07 | 0.11 | 3.64   | 3.00 | 0.05 |
| E1 | GY   | 3B | AX.89562240 | 7.08E+07 | 0.09 | 3.90   | 3.05 | 0.05 |
| E1 | SPM2 | 3B | AX.89620763 | 8.03E+08 | 0.39 | -21.00 | 4.53 | 0.08 |
| E1 | GY   | 3B | AX.89732442 | 7.83E+08 | 0.14 | -3.84  | 4.01 | 0.06 |
| E1 | GY   | 3B | AX.89630147 | 7.06E+07 | 0.09 | 3.90   | 3.05 | 0.05 |
| E1 | SPM2 | 3B | AX.89423755 | 8.04E+08 | 0.39 | -20.16 | 4.20 | 0.07 |
| E1 | SPM2 | 3B | AX.89579114 | 8.04E+08 | 0.35 | -20.79 | 4.28 | 0.08 |
| E1 | SPM2 | 3B | AX.89695576 | 8.00E+08 | 0.45 | -19.22 | 4.02 | 0.07 |
| E1 | GY   | 3B | AX.89329336 | 7.03E+07 | 0.09 | 3.90   | 3.05 | 0.05 |
| E1 | GY   | 3B | AX.89329336 | 7.03E+07 | 0.09 | 3.90   | 3.05 | 0.05 |
| E1 | SPM2 | 3B | AX.89534288 | 8.04E+08 | 0.39 | -20.16 | 4.20 | 0.07 |
| E1 | SPM2 | 3B | AX.89617569 | 8.00E+08 | 0.40 | -20.13 | 4.23 | 0.08 |
| E1 | GY   | 3B | AX.89383104 | 7.82E+08 | 0.48 | 2.46   | 3.49 | 0.07 |
| E1 | SPM2 | 3B | AX.89600175 | 4.02E+07 | 0.31 | 17.79  | 3.08 | 0.05 |
| E1 | SPM2 | 3B | AX.89473605 | 8.03E+08 | 0.43 | -19.35 | 4.02 | 0.07 |
| E1 | GY   | 3B | AX.89391940 | 3.76E+08 | 0.11 | 3.81   | 3.25 | 0.06 |
| E1 | SPM2 | 3B | AX.89385020 | 7.99E+08 | 0.40 | -20.13 | 4.23 | 0.08 |
| E1 | SPM2 | 3B | AX.89492813 | 7.99E+08 | 0.44 | -18.45 | 3.73 | 0.06 |
| E1 | SPM2 | 3B | AX.89340548 | 4.04E+07 | 0.31 | 17.79  | 3.08 | 0.05 |
| E1 | SPM2 | 3B | AX.89361784 | 4.03E+07 | 0.31 | 17.79  | 3.08 | 0.05 |
| E1 | GY   | 3B | AX.89330691 | 2.33E+08 | 0.08 | 4.32   | 3.20 | 0.05 |
| E1 | SPM2 | 3B | AX.89659920 | 8.03E+08 | 0.39 | -21.00 | 4.53 | 0.08 |
| E1 | SPM2 | 3B | AX.89552911 | 7.40E+08 | 0.40 | -18.63 | 3.72 | 0.07 |
| E1 | GY   | 3B | AX.89388524 | 1.03E+07 | 0.30 | -2.72  | 3.57 | 0.06 |
| E1 | SPM2 | 3B | AX.89649431 | 4.05E+07 | 0.27 | 18.45  | 3.11 | 0.05 |
| E1 | SPM2 | 3B | AX.89547794 | 8.04E+08 | 0.35 | -21.64 | 4.61 | 0.08 |
| E1 | GY   | 3B | AX.89560707 | 7.01E+07 | 0.09 | 3.90   | 3.05 | 0.05 |
| E1 | GY   | 3B | AX.89560707 | 7.01E+07 | 0.09 | 3.90   | 3.05 | 0.05 |
| E1 | SPM2 | 3B | AX.89529832 | 8.04E+08 | 0.38 | -20.12 | 4.17 | 0.07 |
| E1 | GY   | 3B | AX.89708796 | 4.48E+08 | 0.12 | 3.75   | 3.37 | 0.06 |
| E1 | GY   | 3B | AX.89331170 | 7.82E+08 | 0.37 | -2.92  | 4.44 | 0.08 |
| E1 | GY   | 3B | AX.89475327 | 1.06E+07 | 0.46 | 2.37   | 3.28 | 0.05 |
| E1 | SPM2 | 3B | AX.89700345 | 7.99E+08 | 0.46 | -18.00 | 3.59 | 0.06 |
| E1 | SPM2 | 3B | AX.89708631 | 8.00E+08 | 0.44 | -18.45 | 3.73 | 0.06 |
| E1 | SPM2 | 3B | AX.89458984 | 8.00E+08 | 0.45 | -18.63 | 3.80 | 0.07 |
| E1 | SPM2 | 3B | AX.89337006 | 8.03E+08 | 0.39 | -21.00 | 4.53 | 0.08 |
| E1 | GY   | 3B | AX.89674421 | 7.82E+08 | 0.46 | 3.05   | 5.07 | 0.10 |
| E1 | GY   | 3B | AX.89459497 | 2.33E+07 | 0.21 | -3.19  | 3.85 | 0.06 |
| E1 | SPM2 | 3B | AX.89662577 | 8.04E+08 | 0.35 | -20.79 | 4.28 | 0.08 |
| E1 | GY   | 3B | AX.89455859 | 2.29E+08 | 0.08 | 4.32   | 3.20 | 0.05 |
| E1 | GY   | 3B | AX.89456017 | 4.08E+07 | 0.11 | 3.64   | 3.00 | 0.05 |
| E1 | GY   | 3B | AX.89402447 | 5.02E+08 | 0.39 | 2.33   | 3.04 | 0.06 |
| E1 | GY   | 3B | AX.89658098 | 6.85E+07 | 0.09 | 3.90   | 3.05 | 0.05 |
| E1 | SPM2 | 3B | AX.89504913 | 8.03E+08 | 0.40 | -21.68 | 4.81 | 0.09 |
| E1 | SPM2 | 3B | AX.89345601 | 7.99E+08 | 0.42 | -18.83 | 3.83 | 0.07 |

|    |      |    |             |          |      |        |      |      |
|----|------|----|-------------|----------|------|--------|------|------|
| E1 | SPM2 | 3B | AX.89345504 | 8.01E+08 | 0.44 | -18.45 | 3.73 | 0.06 |
| E1 | GY   | 3B | AX.89460074 | 5.56E+08 | 0.23 | -2.73  | 3.10 | 0.05 |
| E1 | SPM2 | 3B | AX.89475210 | 8.03E+08 | 0.39 | -21.08 | 4.55 | 0.08 |
| E1 | GY   | 3B | AX.89760382 | 1.25E+08 | 0.10 | 4.02   | 3.34 | 0.06 |
| E1 | GY   | 3B | AX.89528591 | 4.09E+07 | 0.11 | 3.64   | 3.00 | 0.05 |
| E1 | GY   | 3B | AX.89566060 | 7.18E+06 | 0.46 | -2.30  | 3.11 | 0.05 |
| E1 | SPM2 | 3B | AX.89625599 | 7.99E+08 | 0.40 | -20.13 | 4.23 | 0.08 |
| E1 | GY   | 3B | AX.89675055 | 2.27E+07 | 0.20 | -3.24  | 3.79 | 0.06 |
| E1 | GY   | 3B | AX.89682581 | 7.05E+07 | 0.09 | 3.90   | 3.05 | 0.05 |
| E1 | SPM2 | 3B | AX.89362506 | 8.02E+08 | 0.37 | -23.86 | 5.59 | 0.10 |
| E1 | SPM2 | 3B | AX.89703708 | 8.03E+08 | 0.39 | -21.00 | 4.53 | 0.08 |
| E1 | GY   | 3B | AX.89460947 | 2.29E+08 | 0.08 | 4.32   | 3.20 | 0.05 |
| E1 | GY   | 3B | AX.89578279 | 1.91E+08 | 0.09 | 4.01   | 3.07 | 0.05 |
| E1 | GY   | 3B | AX.89676377 | 2.36E+08 | 0.08 | 4.32   | 3.20 | 0.05 |
| E1 | SPM2 | 3B | AX.89596222 | 7.99E+08 | 0.44 | -18.48 | 3.73 | 0.06 |
| E1 | SPM2 | 3B | AX.89495516 | 8.03E+08 | 0.39 | -21.32 | 4.64 | 0.08 |
| E1 | GY   | 3B | AX.89391940 | 3.76E+08 | 0.11 | 3.81   | 3.25 | 0.06 |
| E1 | GY   | 3B | AX.89383562 | 6.50E+08 | 0.42 | -2.64  | 3.89 | 0.08 |
| E1 | SPM2 | 3B | AX.89518649 | 8.00E+08 | 0.45 | -19.21 | 4.00 | 0.07 |
| E1 | GY   | 3B | AX.89353028 | 1.23E+08 | 0.09 | 3.91   | 3.06 | 0.05 |
| E1 | GY   | 3B | AX.89311427 | 4.98E+08 | 0.43 | -2.34  | 3.17 | 0.05 |
| E1 | SPM2 | 3B | AX.89532604 | 8.01E+08 | 0.40 | -20.13 | 4.23 | 0.08 |
| E1 | GY   | 3B | AX.89600688 | 2.04E+08 | 0.07 | 4.53   | 3.31 | 0.06 |
| E1 | GY   | 3B | AX.89357134 | 2.28E+08 | 0.07 | 4.74   | 3.57 | 0.06 |
| E1 | GY   | 3B | AX.89323856 | 1.02E+07 | 0.48 | 2.33   | 3.18 | 0.05 |
| E1 | GY   | 3B | AX.89311864 | 4.49E+08 | 0.12 | 3.52   | 3.11 | 0.05 |
| E1 | GY   | 3B | AX.89564518 | 7.03E+07 | 0.09 | 3.90   | 3.05 | 0.05 |
| E1 | GY   | 3B | AX.89564495 | 7.06E+07 | 0.09 | 3.90   | 3.05 | 0.05 |
| E1 | GY   | 3B | AX.86168705 | 1.52E+07 | 0.33 | 2.70   | 3.72 | 0.06 |
| E1 | SPM2 | 3B | AX.89403940 | 8.03E+08 | 0.43 | -19.35 | 4.02 | 0.07 |
| E1 | SPM2 | 3B | AX.89674879 | 8.00E+08 | 0.44 | -18.45 | 3.73 | 0.06 |
| E1 | SPM2 | 3B | AX.89461841 | 8.04E+08 | 0.38 | -21.19 | 4.57 | 0.08 |
| E1 | SPM2 | 3B | AX.89620465 | 8.04E+08 | 0.35 | -20.79 | 4.28 | 0.08 |
| E1 | SPM2 | 3B | AX.89694777 | 8.03E+08 | 0.42 | -19.39 | 4.02 | 0.07 |
| E1 | GY   | 3B | AX.89719543 | 1.02E+07 | 0.29 | -2.74  | 3.55 | 0.06 |
| E1 | GY   | 3B | AX.89402100 | 2.03E+08 | 0.08 | 4.12   | 3.08 | 0.05 |
| E1 | GY   | 3B | AX.89467345 | 2.40E+08 | 0.08 | 4.32   | 3.20 | 0.05 |
| E1 | GY   | 3B | AX.86166684 | 1.25E+08 | 0.09 | 3.91   | 3.06 | 0.05 |
| E1 | GY   | 3B | AX.89406016 | 1.73E+07 | 0.24 | 2.66   | 3.07 | 0.05 |
| E1 | SPM2 | 3B | AX.89735956 | 7.99E+08 | 0.44 | -18.48 | 3.73 | 0.06 |
| E1 | SPM2 | 3B | AX.89695993 | 8.01E+08 | 0.44 | -18.45 | 3.73 | 0.06 |
| E1 | GY   | 3B | AX.89325062 | 3.70E+08 | 0.11 | 3.81   | 3.26 | 0.06 |
| E1 | SPM2 | 3B | AX.89492044 | 8.00E+08 | 0.44 | -18.48 | 3.73 | 0.06 |
| E1 | GY   | 3B | AX.89593889 | 7.00E+07 | 0.09 | 4.10   | 3.31 | 0.06 |
| E1 | GY   | 3B | AX.89549698 | 7.82E+08 | 0.37 | -2.74  | 3.98 | 0.07 |
| E1 | SPM2 | 3B | AX.89775729 | 8.00E+08 | 0.44 | -18.45 | 3.73 | 0.06 |
| E1 | SPM2 | 3B | AX.89326322 | 8.04E+08 | 0.39 | -21.00 | 4.53 | 0.08 |
| E1 | GY   | 3B | AX.89394258 | 7.03E+07 | 0.09 | 3.90   | 3.05 | 0.05 |
| E1 | SPM2 | 3B | AX.89364611 | 7.99E+08 | 0.39 | -20.20 | 4.24 | 0.08 |
| E1 | SPM2 | 3B | AX.89672041 | 8.03E+08 | 0.46 | -19.40 | 4.09 | 0.08 |

|    |      |    |             |          |      |        |      |      |
|----|------|----|-------------|----------|------|--------|------|------|
| E1 | SPM2 | 3B | AX.89313775 | 8.01E+08 | 0.43 | -19.35 | 4.02 | 0.07 |
| E1 | SPM2 | 3B | AX.89387991 | 8.03E+08 | 0.43 | -19.35 | 4.02 | 0.07 |
| E1 | GY   | 3B | AX.89485953 | 7.82E+08 | 0.36 | -2.58  | 3.55 | 0.06 |
| E1 | GY   | 3B | AX.89569831 | 7.82E+08 | 0.37 | -2.75  | 3.98 | 0.07 |
| E1 | SPM2 | 3B | AX.89544767 | 7.99E+08 | 0.40 | -20.13 | 4.23 | 0.08 |
| E1 | GY   | 3B | AX.89630147 | 7.06E+07 | 0.09 | 3.90   | 3.05 | 0.05 |
| E1 | SPM2 | 3B | AX.89374438 | 8.04E+08 | 0.39 | -21.00 | 4.53 | 0.08 |
| E1 | GY   | 3B | AX.89732865 | 2.40E+08 | 0.08 | 4.17   | 3.14 | 0.05 |
| E1 | SPM2 | 3B | AX.89386915 | 8.00E+08 | 0.44 | -18.45 | 3.73 | 0.06 |
| E1 | GY   | 3B | AX.89578279 | 1.91E+08 | 0.09 | 4.01   | 3.07 | 0.05 |
| E1 | SPM2 | 3B | AX.89340823 | 7.99E+08 | 0.39 | -20.20 | 4.24 | 0.08 |
| E1 | GY   | 3B | AX.89454148 | 4.48E+08 | 0.12 | 3.52   | 3.11 | 0.05 |
| E1 | GY   | 3B | AX.89692867 | 7.82E+08 | 0.37 | -2.74  | 3.98 | 0.07 |
| E1 | SPM2 | 3B | AX.89344886 | 8.03E+08 | 0.39 | -21.00 | 4.53 | 0.08 |
| E1 | GY   | 3B | AX.89567643 | 5.56E+08 | 0.23 | -2.73  | 3.10 | 0.05 |
| E1 | GY   | 3B | AX.89643547 | 2.37E+08 | 0.08 | 4.32   | 3.20 | 0.05 |
| E1 | GY   | 3B | AX.89348758 | 9.06E+06 | 0.36 | 2.89   | 4.34 | 0.07 |
| E1 | GY   | 3B | AX.89478502 | 1.03E+07 | 0.30 | -2.75  | 3.66 | 0.06 |
| E1 | SPM2 | 3B | AX.89723055 | 8.01E+08 | 0.43 | -20.15 | 4.32 | 0.08 |
| E1 | GY   | 3B | AX.89327655 | 7.03E+07 | 0.09 | 3.90   | 3.05 | 0.05 |
| E1 | GY   | 3B | AX.89575875 | 2.44E+07 | 0.23 | -2.87  | 3.39 | 0.05 |
| E1 | SPM2 | 3B | AX.89609788 | 8.01E+08 | 0.40 | -22.97 | 5.35 | 0.10 |
| E1 | GY   | 3B | AX.89373893 | 7.83E+08 | 0.48 | 2.46   | 3.49 | 0.07 |
| E1 | GY   | 3B | AX.89324266 | 7.59E+08 | 0.26 | -2.72  | 3.30 | 0.06 |
| E1 | GY   | 3B | AX.89366224 | 1.10E+07 | 0.43 | -2.35  | 3.18 | 0.05 |
| E1 | GY   | 3B | AX.89515680 | 7.03E+07 | 0.09 | 3.90   | 3.05 | 0.05 |
| E1 | GY   | 3B | AX.89467345 | 2.40E+08 | 0.08 | 4.32   | 3.20 | 0.05 |
| E1 | GY   | 3B | AX.89561191 | 4.47E+08 | 0.12 | 3.52   | 3.11 | 0.05 |
| E1 | GY   | 3B | AX.89448959 | 7.03E+07 | 0.09 | 3.90   | 3.05 | 0.05 |
| E1 | GY   | 3B | AX.89456017 | 4.08E+07 | 0.11 | 3.64   | 3.00 | 0.05 |
| E1 | GY   | 3B | AX.89731729 | 1.59E+07 | 0.33 | 2.95   | 4.32 | 0.07 |
| E1 | SPM2 | 3B | AX.89400782 | 7.99E+08 | 0.40 | -20.13 | 4.23 | 0.08 |
| E1 | GY   | 3B | AX.89658098 | 6.85E+07 | 0.09 | 3.90   | 3.05 | 0.05 |
| E1 | GY   | 3B | AX.89411035 | 7.01E+07 | 0.09 | 3.90   | 3.05 | 0.05 |
| E1 | SPM2 | 3B | AX.89527522 | 7.99E+08 | 0.44 | -18.45 | 3.73 | 0.06 |
| E1 | GY   | 3B | AX.89339369 | 2.33E+08 | 0.08 | 4.32   | 3.20 | 0.05 |
| E1 | SPM2 | 3B | AX.89672915 | 8.04E+08 | 0.39 | -20.89 | 4.49 | 0.08 |
| E1 | SPM2 | 3B | AX.89763367 | 8.00E+08 | 0.40 | -20.89 | 4.54 | 0.08 |
| E1 | SPM2 | 3B | AX.89491560 | 7.99E+08 | 0.44 | -18.48 | 3.73 | 0.06 |
| E1 | GY   | 3B | AX.89625540 | 7.82E+08 | 0.37 | -2.75  | 3.98 | 0.07 |
| E1 | GY   | 3B | AX.89371805 | 2.06E+08 | 0.07 | 4.53   | 3.31 | 0.06 |
| E1 | SPM2 | 3B | AX.89637096 | 8.04E+08 | 0.40 | -19.31 | 3.94 | 0.07 |
| E1 | SPM2 | 3B | AX.89393570 | 8.01E+08 | 0.40 | -22.01 | 4.98 | 0.09 |
| E1 | SPM2 | 3B | AX.89580278 | 8.00E+08 | 0.43 | -17.70 | 3.46 | 0.06 |
| E1 | GY   | 3B | AX.89732865 | 2.40E+08 | 0.08 | 4.17   | 3.14 | 0.05 |
| E1 | GY   | 3B | AX.89387027 | 4.48E+08 | 0.11 | 3.90   | 3.50 | 0.06 |
| E1 | SPM2 | 3B | AX.89731763 | 8.03E+08 | 0.39 | -21.00 | 4.53 | 0.08 |
| E1 | GY   | 3B | AX.89610917 | 2.31E+07 | 0.21 | -3.19  | 3.85 | 0.06 |
| E1 | GY   | 3B | AX.89517853 | 1.56E+08 | 0.08 | 4.24   | 3.10 | 0.05 |
| E1 | GY   | 3B | AX.89517853 | 1.56E+08 | 0.08 | 4.24   | 3.10 | 0.05 |

|    |      |    |             |          |      |        |      |      |
|----|------|----|-------------|----------|------|--------|------|------|
| E1 | GY   | 3B | AX.89364758 | 7.47E+07 | 0.09 | 3.90   | 3.05 | 0.05 |
| E1 | GY   | 3B | AX.89587214 | 5.79E+08 | 0.19 | -2.96  | 3.13 | 0.05 |
| E1 | GY   | 3B | AX.89329922 | 7.01E+07 | 0.09 | 3.90   | 3.05 | 0.05 |
| E1 | SPM2 | 3B | AX.89357763 | 8.01E+08 | 0.38 | -22.76 | 5.19 | 0.09 |
| E1 | SPM2 | 3B | AX.89737012 | 8.03E+08 | 0.38 | -21.19 | 4.57 | 0.08 |
| E1 | SPM2 | 3B | AX.89411012 | 8.03E+08 | 0.39 | -21.00 | 4.53 | 0.08 |
| E1 | GY   | 3B | AX.89396277 | 1.03E+07 | 0.29 | -2.74  | 3.55 | 0.06 |
| E1 | GY   | 3B | AX.89353028 | 1.23E+08 | 0.09 | 3.91   | 3.06 | 0.05 |
| E1 | SPM2 | 3B | AX.89618460 | 8.00E+08 | 0.44 | -18.48 | 3.73 | 0.06 |
| E1 | GY   | 3B | AX.89551857 | 7.04E+07 | 0.09 | 3.90   | 3.05 | 0.05 |
| E1 | SPM2 | 3B | AX.89314874 | 8.03E+08 | 0.40 | -21.68 | 4.81 | 0.09 |
| E1 | SPM2 | 3B | AX.89444716 | 8.00E+08 | 0.44 | -18.45 | 3.73 | 0.06 |
| E1 | SPM2 | 3B | AX.89416863 | 7.99E+08 | 0.39 | -20.20 | 4.24 | 0.08 |
| E1 | GY   | 3B | AX.89483927 | 7.79E+07 | 0.09 | 3.90   | 3.05 | 0.05 |
| E1 | SPM2 | 3B | AX.89408600 | 8.00E+08 | 0.39 | -20.39 | 4.29 | 0.08 |
| E1 | GY   | 3B | AX.89330691 | 2.33E+08 | 0.08 | 4.32   | 3.20 | 0.05 |
| E1 | GY   | 3B | AX.89479047 | 2.26E+08 | 0.08 | 4.32   | 3.20 | 0.05 |
| E1 | GY   | 3B | AX.89660595 | 2.37E+07 | 0.21 | -3.19  | 3.85 | 0.06 |
| E1 | SPM2 | 3B | AX.89649950 | 8.04E+08 | 0.38 | -21.19 | 4.57 | 0.08 |
| E1 | GY   | 3B | AX.89409713 | 2.32E+07 | 0.21 | -3.19  | 3.85 | 0.06 |
| E1 | GY   | 3B | AX.89660595 | 2.37E+07 | 0.21 | -3.19  | 3.85 | 0.06 |
| E1 | GY   | 3B | AX.89466525 | 7.83E+08 | 0.08 | -4.26  | 3.26 | 0.05 |
| E1 | GY   | 3B | AX.89644459 | 1.90E+08 | 0.07 | 4.99   | 3.71 | 0.06 |
| E1 | GY   | 3B | AX.89506895 | 1.38E+07 | 0.22 | -2.80  | 3.20 | 0.05 |
| E1 | SPM2 | 3B | AX.89773679 | 8.02E+08 | 0.43 | -20.11 | 4.31 | 0.08 |
| E1 | GY   | 3B | AX.89448477 | 2.33E+08 | 0.08 | 4.32   | 3.20 | 0.05 |
| E1 | GY   | 3B | AX.89743164 | 7.82E+08 | 0.37 | -2.75  | 3.98 | 0.07 |
| E1 | GY   | 3B | AX.89437067 | 4.48E+08 | 0.12 | 3.52   | 3.11 | 0.05 |
| E1 | GY   | 3B | AX.89437067 | 4.48E+08 | 0.12 | 3.52   | 3.11 | 0.05 |
| E1 | SPM2 | 3B | AX.89364800 | 8.01E+08 | 0.44 | -18.45 | 3.73 | 0.06 |
| E1 | GY   | 3B | AX.89715248 | 8.26E+08 | 0.06 | -4.98  | 3.30 | 0.05 |
| E1 | GY   | 3B | AX.89366640 | 2.51E+07 | 0.23 | -2.99  | 3.66 | 0.06 |
| E1 | GY   | 3B | AX.89366640 | 2.51E+07 | 0.23 | -2.99  | 3.66 | 0.06 |
| E1 | GY   | 3B | AX.89485267 | 2.68E+08 | 0.10 | 3.81   | 3.15 | 0.05 |
| E1 | GY   | 3B | AX.89589610 | 4.48E+08 | 0.12 | 3.52   | 3.11 | 0.05 |
| E1 | SPM2 | 3B | AX.89777460 | 8.01E+08 | 0.44 | -18.45 | 3.73 | 0.06 |
| E1 | GY   | 3B | AX.89650451 | 5.79E+08 | 0.19 | -2.96  | 3.13 | 0.05 |
| E1 | GY   | 3B | AX.89650451 | 5.79E+08 | 0.19 | -2.96  | 3.13 | 0.05 |
| E1 | SPM2 | 3B | AX.89393873 | 7.99E+08 | 0.44 | -18.45 | 3.73 | 0.06 |
| E1 | SPM2 | 3B | AX.89505485 | 8.03E+08 | 0.40 | -21.68 | 4.81 | 0.09 |
| E1 | SPM2 | 3B | AX.89523885 | 8.01E+08 | 0.44 | -18.48 | 3.73 | 0.06 |
| E1 | SPM2 | 3B | AX.89486736 | 8.01E+08 | 0.43 | -19.35 | 4.02 | 0.07 |
| E1 | GY   | 3B | AX.89460947 | 2.29E+08 | 0.08 | 4.32   | 3.20 | 0.05 |
| E1 | SPM2 | 3B | AX.89721513 | 7.99E+08 | 0.39 | -20.20 | 4.24 | 0.08 |
| E1 | GY   | 3B | AX.89761468 | 5.79E+08 | 0.19 | -2.96  | 3.13 | 0.05 |
| E1 | SPM2 | 3B | AX.89358912 | 8.03E+08 | 0.39 | -21.00 | 4.53 | 0.08 |
| E1 | GY   | 3B | AX.89540019 | 2.37E+07 | 0.21 | -3.19  | 3.85 | 0.06 |
| E1 | SPM2 | 3B | AX.89339775 | 8.00E+08 | 0.39 | -19.80 | 4.08 | 0.07 |
| E1 | GY   | 3B | AX.89473429 | 4.08E+07 | 0.11 | 3.64   | 3.00 | 0.05 |
| E1 | SPM2 | 3B | AX.89479409 | 7.99E+08 | 0.40 | -20.13 | 4.23 | 0.08 |



|    |      |    |             |          |      |        |      |      |
|----|------|----|-------------|----------|------|--------|------|------|
| E1 | GY   | 3B | AX.89450810 | 1.60E+07 | 0.33 | 2.95   | 4.32 | 0.07 |
| E1 | GY   | 3B | AX.89611369 | 7.08E+07 | 0.10 | 4.01   | 3.31 | 0.06 |
| E1 | SPM2 | 3B | AX.89730128 | 8.03E+08 | 0.44 | -17.51 | 3.40 | 0.06 |
| E1 | SPM2 | 3B | AX.89656217 | 7.99E+08 | 0.40 | -20.13 | 4.23 | 0.08 |
| E1 | GY   | 3B | AX.89615340 | 2.03E+08 | 0.08 | 4.12   | 3.08 | 0.05 |
| E1 | GY   | 3B | AX.89404563 | 9.10E+06 | 0.38 | 2.68   | 3.87 | 0.06 |
| E1 | SPM2 | 3B | AX.89323935 | 7.99E+08 | 0.39 | -20.20 | 4.24 | 0.08 |
| E1 | GY   | 3B | AX.89616116 | 7.83E+08 | 0.48 | 2.39   | 3.34 | 0.06 |
| E1 | GY   | 3B | AX.89616116 | 7.83E+08 | 0.48 | 2.39   | 3.34 | 0.06 |
| E1 | GY   | 3B | AX.89544604 | 2.30E+07 | 0.21 | -3.19  | 3.85 | 0.06 |
| E1 | SPM2 | 3B | AX.89372370 | 8.03E+08 | 0.39 | -21.00 | 4.53 | 0.08 |
| E1 | GY   | 3B | AX.89312150 | 2.26E+08 | 0.08 | 4.32   | 3.20 | 0.05 |
| E1 | GY   | 3B | AX.89312150 | 2.26E+08 | 0.08 | 4.32   | 3.20 | 0.05 |
| E1 | GY   | 3B | AX.89575875 | 2.44E+07 | 0.23 | -2.87  | 3.39 | 0.05 |
| E1 | GY   | 3B | AX.89714524 | 7.82E+08 | 0.37 | -2.74  | 3.98 | 0.07 |
| E1 | SPM2 | 3B | AX.89353869 | 8.03E+08 | 0.45 | -17.94 | 3.55 | 0.06 |
| E1 | SPM2 | 3B | AX.86168521 | 8.00E+08 | 0.40 | -20.88 | 4.52 | 0.08 |
| E1 | GY   | 3B | AX.89381129 | 2.40E+08 | 0.08 | 4.17   | 3.14 | 0.05 |
| E1 | SPM2 | 3B | AX.89359679 | 8.04E+08 | 0.38 | -21.19 | 4.57 | 0.08 |
| E1 | SPM2 | 3B | AX.89365459 | 8.02E+08 | 0.43 | -19.35 | 4.02 | 0.07 |
| E1 | GY   | 3B | AX.89358096 | 7.82E+08 | 0.47 | 2.84   | 4.48 | 0.09 |
| E1 | GY   | 3B | AX.89511806 | 2.45E+07 | 0.27 | -2.69  | 3.36 | 0.05 |
| E1 | GY   | 3B | AX.89511806 | 2.45E+07 | 0.27 | -2.69  | 3.36 | 0.05 |
| E1 | GY   | 3B | AX.89523771 | 7.82E+08 | 0.47 | 2.99   | 4.92 | 0.09 |
| E1 | GY   | 3B | AX.89593554 | 7.01E+07 | 0.09 | 3.90   | 3.05 | 0.05 |
| E1 | GY   | 3B | AX.89497828 | 1.61E+07 | 0.34 | 2.63   | 3.59 | 0.05 |
| E1 | GY   | 3B | AX.89312853 | 3.06E+08 | 0.09 | 4.00   | 3.06 | 0.05 |
| E1 | GY   | 3B | AX.89640877 | 9.11E+06 | 0.39 | 2.36   | 3.12 | 0.05 |
| E1 | SPM2 | 3B | AX.89463985 | 8.00E+08 | 0.40 | -20.13 | 4.23 | 0.08 |
| E1 | GY   | 3B | AX.89313026 | 4.47E+08 | 0.12 | 3.52   | 3.11 | 0.05 |
| E1 | SPM2 | 3B | AX.89406125 | 8.03E+08 | 0.39 | -21.00 | 4.53 | 0.08 |
| E1 | GY   | 3B | AX.89313251 | 2.27E+08 | 0.07 | 4.74   | 3.57 | 0.06 |
| E1 | GY   | 3B | AX.89568398 | 4.08E+07 | 0.11 | 3.64   | 3.00 | 0.05 |
| E1 | GY   | 3B | AX.89512828 | 7.83E+08 | 0.15 | -4.14  | 4.81 | 0.08 |
| E1 | GY   | 3B | AX.89524440 | 9.06E+06 | 0.36 | 2.89   | 4.34 | 0.07 |
| E1 | GY   | 3B | AX.89476611 | 7.05E+07 | 0.09 | 3.90   | 3.05 | 0.05 |
| E1 | GY   | 3B | AX.89676562 | 1.27E+08 | 0.09 | 3.91   | 3.06 | 0.05 |
| E1 | SPM2 | 3B | AX.89437166 | 8.00E+08 | 0.44 | -18.45 | 3.73 | 0.06 |
| E1 | GY   | 3B | AX.89489735 | 7.82E+08 | 0.37 | -2.75  | 3.98 | 0.07 |
| E1 | GY   | 3B | AX.89546982 | 7.82E+08 | 0.37 | -2.54  | 3.48 | 0.06 |
| E1 | GY   | 3B | AX.89642745 | 7.01E+07 | 0.09 | 3.90   | 3.05 | 0.05 |
| E1 | GY   | 3B | AX.89515390 | 7.03E+07 | 0.09 | 3.90   | 3.05 | 0.05 |
| E1 | GY   | 3B | AX.89356046 | 7.82E+08 | 0.36 | -2.58  | 3.55 | 0.06 |
| E1 | SPM2 | 3B | AX.89433905 | 8.04E+08 | 0.45 | -18.04 | 3.59 | 0.06 |
| E1 | GY   | 3B | AX.89348080 | 7.82E+08 | 0.38 | -2.55  | 3.53 | 0.06 |
| E1 | GY   | 3B | AX.89443091 | 7.04E+07 | 0.09 | 3.90   | 3.05 | 0.05 |
| E1 | GY   | 3B | AX.89314692 | 2.46E+07 | 0.28 | -2.64  | 3.28 | 0.05 |
| E1 | GY   | 3B | AX.89443091 | 7.04E+07 | 0.09 | 3.90   | 3.05 | 0.05 |
| E1 | GY   | 3B | AX.89525850 | 7.82E+08 | 0.46 | 3.18   | 5.46 | 0.11 |
| E1 | GY   | 3B | AX.89443514 | 2.37E+07 | 0.21 | -3.19  | 3.85 | 0.06 |

|    |      |    |             |          |      |        |      |      |
|----|------|----|-------------|----------|------|--------|------|------|
| E1 | GY   | 3B | AX.89323856 | 1.02E+07 | 0.48 | 2.33   | 3.18 | 0.05 |
| E1 | GY   | 3B | AX.89718547 | 1.30E+08 | 0.09 | 3.91   | 3.06 | 0.05 |
| E1 | GY   | 3B | AX.89316012 | 7.82E+08 | 0.38 | -2.70  | 3.91 | 0.07 |
| E1 | GY   | 3B | AX.89432992 | 7.82E+08 | 0.47 | 2.99   | 4.92 | 0.09 |
| E1 | SPM2 | 3B | AX.89703019 | 8.04E+08 | 0.39 | -21.00 | 4.53 | 0.08 |
| E1 | SPM2 | 3B | AX.89599709 | 7.99E+08 | 0.39 | -20.20 | 4.24 | 0.08 |
| E1 | SPM2 | 3B | AX.89754549 | 8.04E+08 | 0.39 | -21.00 | 4.53 | 0.08 |
| E1 | SPM2 | 3B | AX.89501443 | 8.04E+08 | 0.39 | -21.00 | 4.53 | 0.08 |
| E1 | GY   | 3B | AX.89455587 | 2.29E+08 | 0.08 | 4.32   | 3.20 | 0.05 |
| E1 | GY   | 3B | AX.89455587 | 2.29E+08 | 0.08 | 4.32   | 3.20 | 0.05 |
| E1 | SPM2 | 3B | AX.89528748 | 8.03E+08 | 0.40 | -18.16 | 3.53 | 0.06 |
| E1 | GY   | 3B | AX.89317109 | 7.01E+07 | 0.09 | 3.90   | 3.05 | 0.05 |
| E1 | GY   | 3B | AX.89350546 | 7.84E+08 | 0.44 | -2.43  | 3.39 | 0.05 |
| E1 | GY   | 3B | AX.89597701 | 4.09E+07 | 0.11 | 3.64   | 3.00 | 0.05 |
| E1 | GY   | 3B | AX.89597701 | 4.09E+07 | 0.11 | 3.64   | 3.00 | 0.05 |
| E1 | GY   | 3B | AX.89706937 | 7.82E+08 | 0.37 | -2.73  | 3.95 | 0.07 |
| E1 | GY   | 3B | AX.89597766 | 7.84E+08 | 0.46 | -2.67  | 4.02 | 0.07 |
| E1 | GY   | 3B | AX.89350796 | 5.79E+08 | 0.19 | -2.96  | 3.13 | 0.05 |
| E1 | GY   | 3B | AX.89492320 | 2.82E+07 | 0.24 | 2.63   | 3.01 | 0.04 |
| E1 | GY   | 3B | AX.89697322 | 7.03E+07 | 0.09 | 3.90   | 3.05 | 0.05 |
| E1 | GY   | 3B | AX.89682271 | 4.95E+08 | 0.12 | 3.47   | 3.04 | 0.05 |
| E1 | GY   | 3B | AX.89682271 | 4.95E+08 | 0.12 | 3.47   | 3.04 | 0.05 |
| E1 | GY   | 3B | AX.89598242 | 7.03E+07 | 0.09 | 3.90   | 3.05 | 0.05 |
| E1 | GY   | 3B | AX.89598242 | 7.03E+07 | 0.09 | 3.90   | 3.05 | 0.05 |
| E1 | SPM2 | 3B | AX.89743728 | 8.03E+08 | 0.39 | -21.00 | 4.53 | 0.08 |
| E1 | GY   | 3B | AX.89504416 | 2.28E+08 | 0.08 | 4.32   | 3.20 | 0.05 |
| E1 | GY   | 3B | AX.89446220 | 7.82E+08 | 0.47 | 2.99   | 4.92 | 0.09 |
| E1 | SPM2 | 3B | AX.89768780 | 8.04E+08 | 0.43 | -18.64 | 3.76 | 0.07 |
| E1 | GY   | 3B | AX.89732442 | 7.83E+08 | 0.14 | -3.84  | 4.01 | 0.06 |
| E1 | SPM2 | 3B | AX.89666371 | 8.01E+08 | 0.42 | -19.39 | 4.02 | 0.07 |
| E1 | GY   | 3B | AX.89712587 | 1.38E+07 | 0.24 | -3.00  | 3.73 | 0.06 |
| E1 | GY   | 3B | AX.89386944 | 2.03E+08 | 0.07 | 4.53   | 3.31 | 0.06 |
| E1 | SPM2 | 3B | AX.89454240 | 8.03E+08 | 0.40 | -21.68 | 4.81 | 0.09 |
| E1 | GY   | 3B | AX.89712787 | 7.82E+08 | 0.37 | -2.75  | 3.98 | 0.07 |
| E1 | GY   | 3B | AX.89483101 | 2.34E+07 | 0.21 | -3.19  | 3.85 | 0.06 |
| E1 | GY   | 3B | AX.89587214 | 5.79E+08 | 0.19 | -2.96  | 3.13 | 0.05 |
| E1 | GY   | 3B | AX.89329922 | 7.01E+07 | 0.09 | 3.90   | 3.05 | 0.05 |
| E1 | GY   | 3B | AX.89336987 | 7.82E+08 | 0.37 | -2.74  | 3.98 | 0.07 |
| E1 | GY   | 3B | AX.89733538 | 1.58E+07 | 0.33 | 2.79   | 3.89 | 0.06 |
| E1 | GY   | 3B | AX.89457880 | 1.25E+08 | 0.09 | 3.91   | 3.06 | 0.05 |
| E1 | GY   | 3B | AX.89587994 | 1.56E+08 | 0.08 | 4.24   | 3.10 | 0.05 |
| E1 | GY   | 3B | AX.86166684 | 1.25E+08 | 0.09 | 3.91   | 3.06 | 0.05 |
| E1 | GY   | 3B | AX.89709938 | 4.09E+07 | 0.11 | 3.64   | 3.00 | 0.05 |
| E1 | GY   | 3B | AX.89537035 | 1.91E+08 | 0.09 | 4.01   | 3.07 | 0.05 |
| E1 | GY   | 3B | AX.89506367 | 5.79E+08 | 0.19 | -2.96  | 3.13 | 0.05 |
| E1 | SPM2 | 3B | AX.89315788 | 8.03E+08 | 0.39 | -21.00 | 4.53 | 0.08 |
| E1 | GY   | 3B | AX.89377431 | 7.83E+08 | 0.08 | -4.26  | 3.26 | 0.05 |
| E1 | GY   | 3B | AX.89648362 | 7.82E+08 | 0.45 | 3.09   | 5.17 | 0.10 |
| E1 | SPM2 | 3B | AX.89761672 | 8.00E+08 | 0.44 | -18.45 | 3.73 | 0.06 |
| E1 | GY   | 3B | AX.89331170 | 7.82E+08 | 0.37 | -2.92  | 4.44 | 0.08 |

|    |      |    |             |          |      |        |      |      |
|----|------|----|-------------|----------|------|--------|------|------|
| E1 | GY   | 3B | AX.89746446 | 1.21E+08 | 0.09 | 3.91   | 3.06 | 0.05 |
| E1 | GY   | 3B | AX.89746446 | 1.21E+08 | 0.09 | 3.91   | 3.06 | 0.05 |
| E1 | GY   | 3B | AX.89448477 | 2.33E+08 | 0.08 | 4.32   | 3.20 | 0.05 |
| E1 | GY   | 3B | AX.89772132 | 5.01E+08 | 0.49 | -2.28  | 3.08 | 0.06 |
| E1 | GY   | 3B | AX.89674141 | 4.45E+08 | 0.12 | 3.59   | 3.13 | 0.05 |
| E1 | GY   | 3B | AX.89320718 | 7.82E+08 | 0.36 | -2.58  | 3.54 | 0.06 |
| E1 | GY   | 3B | AX.89613009 | 2.28E+07 | 0.35 | -2.94  | 4.39 | 0.08 |
| E1 | GY   | 3B | AX.89613009 | 2.28E+07 | 0.35 | -2.94  | 4.39 | 0.08 |
| E1 | GY   | 3B | AX.89674254 | 1.95E+08 | 0.07 | 4.99   | 3.71 | 0.06 |
| E1 | GY   | 3B | AX.89674254 | 1.95E+08 | 0.07 | 4.99   | 3.71 | 0.06 |
| E1 | GY   | 3B | AX.89448959 | 7.03E+07 | 0.09 | 3.90   | 3.05 | 0.05 |
| E1 | GY   | 3B | AX.89589610 | 4.48E+08 | 0.12 | 3.52   | 3.11 | 0.05 |
| E1 | SPM2 | 3B | AX.89766559 | 8.01E+08 | 0.44 | -18.45 | 3.73 | 0.06 |
| E1 | GY   | 3B | AX.89425717 | 8.11E+08 | 0.17 | 3.25   | 3.43 | 0.06 |
| E1 | GY   | 3B | AX.89613532 | 2.29E+08 | 0.07 | 4.74   | 3.57 | 0.06 |
| E1 | GY   | 3B | AX.89718794 | 1.07E+07 | 0.43 | -2.29  | 3.06 | 0.05 |
| E1 | GY   | 3B | AX.89747835 | 7.03E+07 | 0.09 | 3.90   | 3.05 | 0.05 |
| E1 | GY   | 3B | AX.89438018 | 2.36E+08 | 0.08 | 4.32   | 3.20 | 0.05 |
| E1 | GY   | 3B | AX.89438018 | 2.36E+08 | 0.08 | 4.32   | 3.20 | 0.05 |
| E1 | GY   | 3B | AX.89449822 | 1.03E+07 | 0.42 | -2.42  | 3.34 | 0.05 |
| E1 | GY   | 3B | AX.89449822 | 1.03E+07 | 0.42 | -2.42  | 3.34 | 0.05 |
| E1 | GY   | 3B | AX.89744326 | 4.06E+07 | 0.11 | 3.64   | 3.00 | 0.05 |
| E1 | GY   | 3B | AX.89355686 | 1.21E+08 | 0.09 | 3.91   | 3.06 | 0.05 |
| E1 | GY   | 3B | AX.89603104 | 1.03E+07 | 0.44 | 2.47   | 3.48 | 0.05 |
| E1 | GY   | 3B | AX.89415541 | 7.82E+08 | 0.46 | 3.05   | 5.07 | 0.10 |
| E1 | GY   | 3B | AX.89356046 | 7.82E+08 | 0.36 | -2.58  | 3.55 | 0.06 |
| E1 | GY   | 3B | AX.89344711 | 7.05E+07 | 0.09 | 3.90   | 3.05 | 0.05 |
| E1 | GY   | 3B | AX.89368821 | 5.45E+08 | 0.26 | -2.68  | 3.25 | 0.07 |
| E1 | GY   | 3B | AX.89368821 | 5.45E+08 | 0.26 | -2.68  | 3.25 | 0.07 |
| E1 | GY   | 3B | AX.89450660 | 2.37E+07 | 0.21 | -3.19  | 3.85 | 0.06 |
| E1 | GY   | 3B | AX.89450660 | 2.37E+07 | 0.21 | -3.19  | 3.85 | 0.06 |
| E1 | SPM2 | 3B | AX.89597132 | 8.00E+08 | 0.44 | -18.45 | 3.73 | 0.06 |
| E1 | GY   | 3B | AX.89643290 | 7.03E+07 | 0.09 | 3.90   | 3.05 | 0.05 |
| E1 | GY   | 3B | AX.89701327 | 7.82E+08 | 0.36 | -2.58  | 3.55 | 0.06 |
| E1 | GY   | 3B | AX.89311427 | 4.98E+08 | 0.43 | -2.34  | 3.17 | 0.05 |
| E1 | GY   | 3B | AX.89532812 | 1.25E+08 | 0.09 | 3.91   | 3.06 | 0.05 |
| E1 | GY   | 3B | AX.89615340 | 2.03E+08 | 0.08 | 4.12   | 3.08 | 0.05 |
| E1 | SPM2 | 3B | AX.89352432 | 8.04E+08 | 0.38 | -21.19 | 4.57 | 0.08 |
| E1 | GY   | 3B | AX.89749476 | 4.10E+07 | 0.11 | 3.64   | 3.00 | 0.05 |
| E1 | GY   | 3B | AX.89497934 | 4.48E+08 | 0.12 | 3.75   | 3.37 | 0.06 |
| E1 | GY   | 3B | AX.89639311 | 4.98E+08 | 0.43 | -2.43  | 3.37 | 0.06 |
| E1 | GY   | 3B | AX.89702348 | 7.82E+08 | 0.45 | 3.09   | 5.17 | 0.10 |
| E1 | GY   | 3B | AX.89714524 | 7.82E+08 | 0.37 | -2.74  | 3.98 | 0.07 |
| E1 | GY   | 3B | AX.89380994 | 7.18E+07 | 0.09 | 3.90   | 3.05 | 0.05 |
| E1 | GY   | 3B | AX.89324194 | 1.03E+07 | 0.47 | -2.62  | 3.90 | 0.06 |
| E1 | SPM2 | 3B | AX.89720786 | 8.01E+08 | 0.43 | -20.81 | 4.58 | 0.08 |
| E1 | GY   | 3B | AX.89674141 | 4.45E+08 | 0.12 | 3.59   | 3.13 | 0.05 |
| E1 | GY   | 3B | AX.89346209 | 2.29E+08 | 0.08 | 4.32   | 3.20 | 0.05 |
| E1 | GY   | 3B | AX.89717464 | 5.79E+08 | 0.19 | -2.96  | 3.13 | 0.05 |
| E1 | GY   | 3B | AX.89593712 | 7.81E+08 | 0.46 | 3.18   | 5.46 | 0.11 |

|    |      |    |             |          |      |        |      |      |
|----|------|----|-------------|----------|------|--------|------|------|
| E1 | GY   | 3B | AX.89542020 | 3.24E+07 | 0.46 | 2.52   | 3.64 | 0.06 |
| E1 | GY   | 3B | AX.89763741 | 2.25E+08 | 0.08 | 4.32   | 3.20 | 0.05 |
| E1 | GY   | 3B | AX.89763741 | 2.25E+08 | 0.08 | 4.32   | 3.20 | 0.05 |
| E1 | GY   | 3B | AX.89393889 | 7.82E+08 | 0.46 | 3.18   | 5.46 | 0.11 |
| E1 | GY   | 3B | AX.89641049 | 3.03E+07 | 0.17 | 3.55   | 4.06 | 0.07 |
| E1 | GY   | 3B | AX.89593889 | 7.00E+07 | 0.09 | 4.10   | 3.31 | 0.06 |
| E1 | GY   | 3B | AX.89394258 | 7.03E+07 | 0.09 | 3.90   | 3.05 | 0.05 |
| E1 | GY   | 3B | AX.89716122 | 7.01E+08 | 0.05 | -5.86  | 3.52 | 0.07 |
| E1 | GY   | 3B | AX.89617989 | 4.08E+07 | 0.11 | 3.64   | 3.00 | 0.05 |
| E1 | GY   | 3B | AX.89617989 | 4.08E+07 | 0.11 | 3.64   | 3.00 | 0.05 |
| E1 | GY   | 3B | AX.89476611 | 7.05E+07 | 0.09 | 3.90   | 3.05 | 0.05 |
| E1 | GY   | 3B | AX.89642350 | 7.85E+08 | 0.15 | -3.42  | 3.52 | 0.05 |
| E1 | GY   | 3B | AX.89642350 | 7.85E+08 | 0.15 | -3.42  | 3.52 | 0.05 |
| E1 | GY   | 3B | AX.89431154 | 1.07E+07 | 0.43 | -2.29  | 3.06 | 0.05 |
| E1 | SPM2 | 3B | AX.89583201 | 8.01E+08 | 0.43 | -18.04 | 3.57 | 0.06 |
| E1 | SPM2 | 3B | AX.89449178 | 8.01E+08 | 0.40 | -20.13 | 4.23 | 0.08 |
| E1 | GY   | 3B | AX.89704524 | 9.78E+06 | 0.40 | -2.60  | 3.72 | 0.05 |
| E1 | SPM2 | 3B | AX.89390144 | 8.00E+08 | 0.44 | -18.45 | 3.73 | 0.06 |
| E1 | GY   | 3B | AX.89454148 | 4.48E+08 | 0.12 | 3.52   | 3.11 | 0.05 |
| E1 | GY   | 3B | AX.89383562 | 6.50E+08 | 0.42 | -2.64  | 3.89 | 0.08 |
| E1 | GY   | 3B | AX.89348709 | 4.08E+07 | 0.11 | 3.64   | 3.00 | 0.05 |
| E1 | GY   | 3B | AX.89396346 | 5.79E+08 | 0.19 | -2.96  | 3.13 | 0.05 |
| E1 | GY   | 3B | AX.89396346 | 5.79E+08 | 0.19 | -2.96  | 3.13 | 0.05 |
| E1 | GY   | 3B | AX.89501558 | 1.25E+08 | 0.09 | 3.91   | 3.06 | 0.05 |
| E1 | GY   | 3B | AX.89643547 | 2.37E+08 | 0.08 | 4.32   | 3.20 | 0.05 |
| E1 | GY   | 3B | AX.89348758 | 9.06E+06 | 0.36 | 2.89   | 4.34 | 0.07 |
| E1 | SPM2 | 3B | AX.89641049 | 3.03E+07 | 0.17 | 24.53  | 3.79 | 0.07 |
| E1 | GY   | 3B | AX.89396850 | 7.82E+08 | 0.37 | -2.62  | 3.70 | 0.06 |
| E1 | GY   | 3B | AX.89396850 | 7.82E+08 | 0.37 | -2.62  | 3.70 | 0.06 |
| E1 | GY   | 3B | AX.89466138 | 4.48E+08 | 0.12 | 3.75   | 3.37 | 0.06 |
| E1 | GY   | 3B | AX.89466138 | 4.48E+08 | 0.12 | 3.75   | 3.37 | 0.06 |
| E1 | GY   | 3B | AX.89466525 | 7.83E+08 | 0.08 | -4.26  | 3.26 | 0.05 |
| E1 | SPM2 | 3B | AX.89714810 | 8.04E+08 | 0.38 | -21.19 | 4.57 | 0.08 |
| E1 | GY   | 3B | AX.89661779 | 2.33E+08 | 0.08 | 4.32   | 3.20 | 0.05 |
| E1 | GY   | 3B | AX.89350546 | 7.84E+08 | 0.44 | -2.43  | 3.39 | 0.05 |
| E1 | GY   | 3B | AX.89328273 | 7.81E+08 | 0.46 | 3.18   | 5.46 | 0.11 |
| E1 | GY   | 3B | AX.89609467 | 7.81E+08 | 0.36 | -2.74  | 3.95 | 0.07 |
| E1 | GY   | 3B | AX.89706937 | 7.82E+08 | 0.37 | -2.73  | 3.95 | 0.07 |
| E1 | GY   | 3B | AX.89492320 | 2.82E+07 | 0.24 | 2.63   | 3.01 | 0.04 |
| E1 | GY   | 3B | AX.89666287 | 2.27E+07 | 0.20 | -3.16  | 3.67 | 0.06 |
| E1 | SPM2 | 3B | AX.89676518 | 8.04E+08 | 0.38 | -21.39 | 4.62 | 0.08 |
| E1 | GY   | 3B | AX.89433995 | 2.69E+07 | 0.31 | 2.56   | 3.27 | 0.05 |
| E1 | GY   | 3B | AX.89411035 | 7.01E+07 | 0.09 | 3.90   | 3.05 | 0.05 |
| E1 | GY   | 3B | AX.89339369 | 2.33E+08 | 0.08 | 4.32   | 3.20 | 0.05 |
| E1 | GY   | 3B | AX.89456542 | 7.01E+07 | 0.09 | 3.90   | 3.05 | 0.05 |
| E1 | SPM2 | 3B | AX.89743587 | 8.01E+08 | 0.44 | -18.45 | 3.73 | 0.06 |
| E1 | GY   | 3B | AX.89708070 | 1.73E+07 | 0.25 | 2.84   | 3.47 | 0.06 |
| E1 | GY   | 3B | AX.89482460 | 7.82E+08 | 0.37 | -2.75  | 3.98 | 0.07 |
| E1 | GY   | 3B | AX.89610535 | 7.95E+07 | 0.09 | 3.90   | 3.05 | 0.05 |
| E1 | GY   | 3B | AX.89708291 | 7.82E+08 | 0.46 | 3.18   | 5.46 | 0.11 |

|    |      |    |             |          |      |        |      |      |
|----|------|----|-------------|----------|------|--------|------|------|
| E1 | SPM2 | 3B | AX.89686025 | 8.03E+08 | 0.43 | -19.35 | 4.02 | 0.07 |
| E1 | SPM2 | 3B | AX.89768378 | 8.03E+08 | 0.47 | -18.89 | 3.92 | 0.07 |
| E1 | GY   | 3B | AX.89551077 | 5.79E+08 | 0.19 | -2.96  | 3.13 | 0.05 |
| E1 | GY   | 3B | AX.89457880 | 1.25E+08 | 0.09 | 3.91   | 3.06 | 0.05 |
| E1 | GY   | 3B | AX.89457913 | 2.28E+08 | 0.08 | 4.32   | 3.20 | 0.05 |
| E1 | GY   | 3B | AX.89709731 | 1.52E+07 | 0.33 | 2.70   | 3.72 | 0.06 |
| E1 | GY   | 3B | AX.89709731 | 1.52E+07 | 0.33 | 2.70   | 3.72 | 0.06 |
| E1 | GY   | 3B | AX.89749484 | 4.47E+08 | 0.12 | 3.52   | 3.11 | 0.05 |
| E1 | GY   | 3B | AX.89749484 | 4.47E+08 | 0.12 | 3.52   | 3.11 | 0.05 |
| E1 | GY   | 3B | AX.89501988 | 1.06E+07 | 0.46 | 2.37   | 3.28 | 0.05 |
| E1 | GY   | 3B | AX.89501988 | 1.06E+07 | 0.46 | 2.37   | 3.28 | 0.05 |
| E1 | SPM2 | 3B | AX.89447359 | 8.03E+08 | 0.43 | -20.04 | 4.27 | 0.08 |
| E1 | SPM2 | 3B | AX.89721250 | 8.00E+08 | 0.40 | -20.13 | 4.23 | 0.08 |
| E1 | GY   | 3B | AX.89564518 | 7.03E+07 | 0.09 | 3.90   | 3.05 | 0.05 |
| E1 | SPM2 | 3B | AX.89576984 | 4.04E+07 | 0.31 | 17.79  | 3.08 | 0.05 |
| E1 | GY   | 3B | AX.89710866 | 1.02E+07 | 0.29 | -2.74  | 3.55 | 0.06 |
| E1 | SPM2 | 3B | AX.89472809 | 4.05E+07 | 0.31 | 17.79  | 3.08 | 0.05 |
| E1 | GY   | 3B | AX.89459177 | 5.02E+08 | 0.48 | -2.26  | 3.04 | 0.06 |
| E1 | GY   | 3B | AX.89772132 | 5.01E+08 | 0.49 | -2.28  | 3.08 | 0.06 |
| E1 | GY   | 3B | AX.89719543 | 1.02E+07 | 0.29 | -2.74  | 3.55 | 0.06 |
| E1 | GY   | 3B | AX.89402100 | 2.03E+08 | 0.08 | 4.12   | 3.08 | 0.05 |
| E1 | SPM2 | 3B | AX.89383290 | 7.99E+08 | 0.40 | -20.13 | 4.23 | 0.08 |
| E1 | GY   | 3B | AX.89686563 | 1.90E+08 | 0.09 | 4.01   | 3.07 | 0.05 |
| E1 | GY   | 3B | AX.89549698 | 7.82E+08 | 0.37 | -2.74  | 3.98 | 0.07 |
| E1 | SPM2 | 3B | AX.89677281 | 8.00E+08 | 0.40 | -20.13 | 4.23 | 0.08 |
| E1 | GY   | 3B | AX.89332256 | 2.36E+07 | 0.21 | -2.95  | 3.41 | 0.05 |
| E1 | GY   | 3B | AX.89390294 | 2.45E+07 | 0.28 | -2.64  | 3.28 | 0.05 |
| E1 | GY   | 3B | AX.89343746 | 4.09E+07 | 0.11 | 3.64   | 3.00 | 0.05 |
| E1 | GY   | 3B | AX.89485953 | 7.82E+08 | 0.36 | -2.58  | 3.55 | 0.06 |
| E1 | GY   | 3B | AX.89625540 | 7.82E+08 | 0.37 | -2.75  | 3.98 | 0.07 |
| E1 | GY   | 3B | AX.89554686 | 4.52E+08 | 0.12 | 3.56   | 3.08 | 0.05 |
| E1 | SPM2 | 3B | AX.89398301 | 8.00E+08 | 0.39 | -20.20 | 4.24 | 0.08 |
| E1 | SPM2 | 3B | AX.89668740 | 8.04E+08 | 0.42 | -18.87 | 3.84 | 0.07 |
| E1 | GY   | 3B | AX.89737117 | 7.03E+07 | 0.09 | 3.90   | 3.05 | 0.05 |
| E1 | GY   | 3B | AX.89473429 | 4.08E+07 | 0.11 | 3.64   | 3.00 | 0.05 |
| E1 | GY   | 3B | AX.89737415 | 7.05E+07 | 0.09 | 3.90   | 3.05 | 0.05 |
| E1 | GY   | 3B | AX.89737415 | 7.05E+07 | 0.09 | 3.90   | 3.05 | 0.05 |
| E1 | SPM2 | 3B | AX.89424787 | 7.99E+08 | 0.40 | -20.13 | 4.23 | 0.08 |
| E1 | GY   | 3B | AX.89672215 | 7.83E+08 | 0.48 | 2.46   | 3.49 | 0.07 |
| E1 | GY   | 3B | AX.89333525 | 5.45E+08 | 0.27 | -2.61  | 3.13 | 0.06 |
| E1 | GY   | 3B | AX.89578679 | 7.83E+08 | 0.46 | -2.67  | 4.02 | 0.07 |
| E1 | SPM2 | 3B | AX.89460703 | 8.03E+08 | 0.39 | -21.00 | 4.53 | 0.08 |
| E1 | GY   | 3B | AX.89497601 | 7.14E+07 | 0.10 | 3.97   | 3.26 | 0.06 |
| E1 | GY   | 3B | AX.89497601 | 7.14E+07 | 0.10 | 3.97   | 3.26 | 0.06 |
| E1 | GY   | 3B | AX.89567643 | 5.56E+08 | 0.23 | -2.73  | 3.10 | 0.05 |
| E1 | GY   | 3B | AX.89497659 | 7.82E+08 | 0.37 | -2.74  | 3.98 | 0.07 |
| E1 | GY   | 3B | AX.89404398 | 1.03E+07 | 0.48 | 2.51   | 3.62 | 0.06 |
| E1 | GY   | 3B | AX.89404398 | 1.03E+07 | 0.48 | 2.51   | 3.62 | 0.06 |
| E1 | GY   | 3B | AX.89748250 | 7.03E+07 | 0.09 | 4.52   | 3.93 | 0.07 |
| E1 | GY   | 3B | AX.89626033 | 2.27E+08 | 0.08 | 4.32   | 3.20 | 0.05 |

|    |      |    |             |          |      |        |      |      |
|----|------|----|-------------|----------|------|--------|------|------|
| E1 | GY   | 3B | AX.89579270 | 7.04E+07 | 0.09 | 3.90   | 3.05 | 0.05 |
| E1 | GY   | 3B | AX.89762790 | 2.29E+08 | 0.07 | 4.74   | 3.57 | 0.06 |
| E1 | GY   | 3B | AX.89762790 | 2.29E+08 | 0.07 | 4.74   | 3.57 | 0.06 |
| E1 | GY   | 3B | AX.89702348 | 7.82E+08 | 0.45 | 3.09   | 5.17 | 0.10 |
| E1 | GY   | 3B | AX.89475144 | 4.45E+08 | 0.12 | 3.52   | 3.11 | 0.05 |
| E1 | SPM2 | 3B | AX.89567903 | 4.05E+07 | 0.31 | 17.79  | 3.08 | 0.05 |
| E1 | SPM2 | 3B | AX.89325676 | 8.01E+08 | 0.39 | -20.64 | 4.40 | 0.08 |
| E1 | GY   | 3B | AX.89462944 | 2.28E+08 | 0.08 | 4.32   | 3.20 | 0.05 |
| E1 | SPM2 | 3B | AX.89772928 | 8.00E+08 | 0.40 | -20.13 | 4.23 | 0.08 |
| E1 | SPM2 | 3B | AX.89471918 | 8.00E+08 | 0.40 | -20.13 | 4.23 | 0.08 |
| E1 | SPM2 | 3B | AX.89522839 | 8.00E+08 | 0.44 | -18.48 | 3.73 | 0.06 |
| E1 | GY   | 3B | AX.89406016 | 1.73E+07 | 0.24 | 2.66   | 3.07 | 0.05 |
| E1 | GY   | 3B | AX.89703117 | 4.48E+08 | 0.12 | 3.75   | 3.37 | 0.06 |
| E1 | GY   | 3B | AX.89325062 | 3.70E+08 | 0.11 | 3.81   | 3.26 | 0.06 |
| E1 | GY   | 3B | AX.89735675 | 7.82E+08 | 0.37 | -2.74  | 3.98 | 0.07 |
| E1 | GY   | 3B | AX.89371203 | 4.05E+07 | 0.11 | 3.64   | 3.00 | 0.05 |
| E1 | GY   | 3B | AX.89371203 | 4.05E+07 | 0.11 | 3.64   | 3.00 | 0.05 |
| E1 | GY   | 3B | AX.89606724 | 8.01E+05 | 0.07 | -4.61  | 3.06 | 0.05 |
| E1 | GY   | 3B | AX.89716233 | 7.03E+07 | 0.09 | 3.90   | 3.05 | 0.05 |
| E1 | GY   | 3B | AX.89359431 | 4.09E+07 | 0.11 | 3.64   | 3.00 | 0.05 |
| E1 | GY   | 3B | AX.89569831 | 7.82E+08 | 0.37 | -2.75  | 3.98 | 0.07 |
| E1 | SPM2 | 3B | AX.89503767 | 8.01E+08 | 0.40 | -20.31 | 4.30 | 0.08 |
| E1 | GY   | 3B | AX.89371805 | 2.06E+08 | 0.07 | 4.53   | 3.31 | 0.06 |
| E1 | GY   | 3B | AX.89647652 | 2.04E+08 | 0.07 | 4.53   | 3.31 | 0.06 |
| E1 | GY   | 3B | AX.89647652 | 2.04E+08 | 0.07 | 4.53   | 3.31 | 0.06 |
| E1 | GY   | 3B | AX.89371943 | 4.99E+08 | 0.43 | -2.38  | 3.26 | 0.05 |
| E1 | GY   | 3B | AX.89642745 | 7.01E+07 | 0.09 | 3.90   | 3.05 | 0.05 |
| E1 | SPM2 | 3B | AX.89536448 | 7.99E+08 | 0.40 | -20.95 | 4.53 | 0.08 |
| E1 | GY   | 3B | AX.89692867 | 7.82E+08 | 0.37 | -2.74  | 3.98 | 0.07 |
| E1 | GY   | 3B | AX.89336987 | 7.82E+08 | 0.37 | -2.74  | 3.98 | 0.07 |
| E1 | SPM2 | 3B | AX.89310850 | 8.01E+08 | 0.42 | -19.07 | 3.90 | 0.07 |
| E1 | GY   | 3B | AX.89478502 | 1.03E+07 | 0.30 | -2.75  | 3.66 | 0.06 |
| E1 | GY   | 3B | AX.89465739 | 7.82E+08 | 0.37 | -2.74  | 3.98 | 0.07 |
| E1 | SPM2 | 3B | AX.89608889 | 4.05E+07 | 0.31 | 17.79  | 3.08 | 0.05 |
| E1 | SPM2 | 3B | AX.89642903 | 8.00E+08 | 0.40 | -20.13 | 4.23 | 0.08 |
| E1 | GY   | 3B | AX.89656498 | 1.25E+08 | 0.09 | 3.91   | 3.06 | 0.05 |
| E1 | GY   | 3B | AX.89656498 | 1.25E+08 | 0.09 | 3.91   | 3.06 | 0.05 |
| E1 | SPM2 | 3B | AX.89422160 | 4.05E+07 | 0.31 | 17.79  | 3.08 | 0.05 |
| E1 | SPM2 | 3B | AX.89586500 | 8.01E+08 | 0.40 | -20.13 | 4.23 | 0.08 |
| E1 | GY   | 3B | AX.89515680 | 7.03E+07 | 0.09 | 3.90   | 3.05 | 0.05 |
| E1 | GY   | 3B | AX.89433585 | 1.27E+08 | 0.09 | 3.91   | 3.06 | 0.05 |
| E1 | GY   | 3B | AX.89621185 | 7.82E+08 | 0.37 | -2.74  | 3.98 | 0.07 |
| E1 | GY   | 3B | AX.89350796 | 5.79E+08 | 0.19 | -2.96  | 3.13 | 0.05 |
| E1 | GY   | 3B | AX.89398767 | 7.04E+07 | 0.09 | 3.90   | 3.05 | 0.05 |
| E1 | GY   | 3B | AX.89317630 | 2.36E+08 | 0.08 | 4.32   | 3.20 | 0.05 |
| E1 | SPM2 | 3B | AX.89395005 | 8.00E+08 | 0.40 | -20.13 | 4.23 | 0.08 |
| E1 | SPM2 | 3B | AX.89601515 | 8.01E+08 | 0.44 | -18.45 | 3.73 | 0.06 |
| E1 | GY   | 3B | AX.89411094 | 7.72E+07 | 0.09 | 3.90   | 3.05 | 0.05 |
| E1 | GY   | 3B | AX.89411094 | 7.72E+07 | 0.09 | 3.90   | 3.05 | 0.05 |
| E1 | GY   | 3B | AX.89585986 | 7.83E+08 | 0.15 | -4.14  | 4.81 | 0.08 |

|    |      |    |             |          |      |        |      |      |
|----|------|----|-------------|----------|------|--------|------|------|
| E1 | SPM2 | 3B | AX.89668153 | 8.01E+08 | 0.40 | -20.13 | 4.23 | 0.08 |
| E1 | SPM2 | 3B | AX.89526703 | 8.01E+08 | 0.39 | -21.87 | 4.87 | 0.09 |
| E1 | GY   | 3B | AX.89551077 | 5.79E+08 | 0.19 | -2.96  | 3.13 | 0.05 |
| E1 | GY   | 3B | AX.89540019 | 2.37E+07 | 0.21 | -3.19  | 3.85 | 0.06 |
| E1 | GY   | 3B | AX.89412494 | 5.51E+08 | 0.09 | -5.01  | 4.52 | 0.07 |
| E1 | GY   | 3B | AX.89364758 | 7.47E+07 | 0.09 | 3.90   | 3.05 | 0.05 |
| E1 | GY   | 3B | AX.89447089 | 8.10E+08 | 0.18 | 3.23   | 3.58 | 0.06 |
| E1 | GY   | 3B | AX.89611369 | 7.08E+07 | 0.10 | 4.01   | 3.31 | 0.06 |
| E1 | GY   | 3B | AX.89587994 | 1.56E+08 | 0.08 | 4.24   | 3.10 | 0.05 |
| E1 | SPM2 | 3B | AX.89771913 | 8.00E+08 | 0.39 | -20.20 | 4.24 | 0.08 |
| E1 | GY   | 3B | AX.89483927 | 7.79E+07 | 0.09 | 3.90   | 3.05 | 0.05 |
| E1 | GY   | 3B | AX.89478738 | 2.36E+08 | 0.08 | 4.32   | 3.20 | 0.05 |
| E1 | GY   | 3B | AX.89612255 | 5.79E+08 | 0.19 | -2.96  | 3.13 | 0.05 |
| E1 | GY   | 3B | AX.89612255 | 5.79E+08 | 0.19 | -2.96  | 3.13 | 0.05 |
| E1 | GY   | 3B | AX.89644459 | 1.90E+08 | 0.07 | 4.99   | 3.71 | 0.06 |
| E1 | GY   | 3B | AX.89710866 | 1.02E+07 | 0.29 | -2.74  | 3.55 | 0.06 |
| E1 | GY   | 3B | AX.89506895 | 1.38E+07 | 0.22 | -2.80  | 3.20 | 0.05 |
| E1 | GY   | 3B | AX.89592950 | 1.91E+08 | 0.09 | 4.01   | 3.07 | 0.05 |
| E1 | GY   | 3B | AX.89701197 | 1.25E+08 | 0.09 | 3.91   | 3.06 | 0.05 |
| E1 | GY   | 3B | AX.89715248 | 8.26E+08 | 0.06 | -4.98  | 3.30 | 0.05 |
| E1 | GY   | 3B | AX.89593435 | 1.73E+08 | 0.10 | 3.97   | 3.38 | 0.06 |
| E1 | GY   | 3B | AX.89593435 | 1.73E+08 | 0.10 | 3.97   | 3.38 | 0.06 |
| E1 | GY   | 3B | AX.89726171 | 7.82E+08 | 0.46 | 3.18   | 5.46 | 0.11 |
| E1 | GY   | 3B | AX.89726171 | 7.82E+08 | 0.46 | 3.18   | 5.46 | 0.11 |
| E1 | GY   | 3B | AX.89455859 | 2.29E+08 | 0.08 | 4.32   | 3.20 | 0.05 |
| E1 | GY   | 3B | AX.89402447 | 5.02E+08 | 0.39 | 2.33   | 3.04 | 0.06 |
| E1 | GY   | 3B | AX.89332256 | 2.36E+07 | 0.21 | -2.95  | 3.41 | 0.05 |
| E1 | GY   | 3B | AX.89724263 | 7.82E+08 | 0.37 | -2.74  | 3.98 | 0.07 |
| E1 | GY   | 3B | AX.89637578 | 1.70E+08 | 0.09 | 4.18   | 3.30 | 0.06 |
| E1 | GY   | 3B | AX.89637578 | 1.70E+08 | 0.09 | 4.18   | 3.30 | 0.06 |
| E1 | GY   | 3B | AX.89415541 | 7.82E+08 | 0.46 | 3.05   | 5.07 | 0.10 |
| E1 | GY   | 3B | AX.89344711 | 7.05E+07 | 0.09 | 3.90   | 3.05 | 0.05 |
| E1 | GY   | 3B | AX.89775197 | 7.83E+08 | 0.48 | 2.46   | 3.49 | 0.07 |
| E1 | GY   | 3B | AX.89638988 | 1.25E+08 | 0.09 | 3.91   | 3.06 | 0.05 |
| E1 | GY   | 3B | AX.89638988 | 1.25E+08 | 0.09 | 3.91   | 3.06 | 0.05 |
| E1 | GY   | 3B | AX.89532812 | 1.25E+08 | 0.09 | 3.91   | 3.06 | 0.05 |
| E1 | GY   | 3B | AX.89404563 | 9.10E+06 | 0.38 | 2.68   | 3.87 | 0.06 |
| E1 | GY   | 3B | AX.89507261 | 7.04E+07 | 0.10 | 3.97   | 3.26 | 0.06 |
| E1 | GY   | 3B | AX.89649582 | 2.27E+08 | 0.07 | 4.74   | 3.57 | 0.06 |
| E1 | GY   | 3B | AX.89451599 | 1.73E+07 | 0.43 | 3.10   | 5.18 | 0.09 |
| E1 | GY   | 3B | AX.89451599 | 1.73E+07 | 0.43 | 3.10   | 5.18 | 0.09 |
| E1 | GY   | 3B | AX.89623656 | 4.47E+08 | 0.12 | 3.52   | 3.11 | 0.05 |
| E1 | GY   | 3B | AX.89726612 | 1.91E+08 | 0.09 | 4.01   | 3.07 | 0.05 |
| E1 | GY   | 3B | AX.89640219 | 2.40E+08 | 0.08 | 4.17   | 3.14 | 0.05 |
| E1 | GY   | 3B | AX.89523771 | 7.82E+08 | 0.47 | 2.99   | 4.92 | 0.09 |
| E1 | GY   | 3B | AX.89536978 | 2.40E+08 | 0.08 | 4.17   | 3.14 | 0.05 |
| E1 | GY   | 3B | AX.89536978 | 2.40E+08 | 0.08 | 4.17   | 3.14 | 0.05 |
| E1 | GY   | 3B | AX.89641049 | 3.03E+07 | 0.17 | 3.55   | 4.06 | 0.07 |
| E1 | GY   | 3B | AX.89750860 | 4.47E+08 | 0.12 | 3.52   | 3.11 | 0.05 |
| E1 | GY   | 3B | AX.89313278 | 1.88E+08 | 0.09 | 3.91   | 3.06 | 0.05 |

|    |      |    |             |          |      |        |      |      |
|----|------|----|-------------|----------|------|--------|------|------|
| E1 | GY   | 3B | AX.89420916 | 8.11E+08 | 0.17 | 3.25   | 3.43 | 0.06 |
| E1 | GY   | 3B | AX.89568398 | 4.08E+07 | 0.11 | 3.64   | 3.00 | 0.05 |
| E1 | GY   | 3B | AX.89716233 | 7.03E+07 | 0.09 | 3.90   | 3.05 | 0.05 |
| E1 | GY   | 3B | AX.89569738 | 8.10E+08 | 0.17 | 3.12   | 3.26 | 0.06 |
| E1 | GY   | 3B | AX.89335703 | 1.03E+07 | 0.30 | -2.72  | 3.57 | 0.06 |
| E1 | GY   | 3B | AX.89524440 | 9.06E+06 | 0.36 | 2.89   | 4.34 | 0.07 |
| E1 | GY   | 3B | AX.89629664 | 5.32E+08 | 0.09 | -5.81  | 5.88 | 0.10 |
| E1 | GY   | 3B | AX.89629664 | 5.32E+08 | 0.09 | -5.81  | 5.88 | 0.10 |
| E1 | GY   | 3B | AX.89489735 | 7.82E+08 | 0.37 | -2.75  | 3.98 | 0.07 |
| E1 | GY   | 3B | AX.89704353 | 3.78E+08 | 0.14 | 3.21   | 3.02 | 0.05 |
| E1 | GY   | 3B | AX.89704524 | 9.78E+06 | 0.40 | -2.60  | 3.72 | 0.05 |
| E1 | GY   | 3B | AX.89348080 | 7.82E+08 | 0.38 | -2.55  | 3.53 | 0.06 |
| E1 | GY   | 3B | AX.89525850 | 7.82E+08 | 0.46 | 3.18   | 5.46 | 0.11 |
| E1 | GY   | 3B | AX.89443514 | 2.37E+07 | 0.21 | -3.19  | 3.85 | 0.06 |
| E1 | GY   | 3B | AX.89681951 | 4.99E+08 | 0.44 | -2.27  | 3.03 | 0.05 |
| E1 | GPS  | 3B | AX.89519027 | 6.24E+06 | 0.20 | 1.50   | 3.54 | 0.06 |
| E1 | GY   | 3B | AX.89547637 | 9.41E+06 | 0.40 | -2.49  | 3.46 | 0.05 |
| E1 | SPM2 | 3B | AX.89731037 | 8.00E+08 | 0.44 | -18.45 | 3.73 | 0.06 |
| E1 | GY   | 3B | AX.89708451 | 7.83E+08 | 0.46 | -2.67  | 4.02 | 0.07 |
| E1 | GY   | 3B | AX.89512476 | 2.33E+08 | 0.08 | 4.32   | 3.20 | 0.05 |
| E1 | GY   | 3B | AX.89564495 | 7.06E+07 | 0.09 | 3.90   | 3.05 | 0.05 |
| E1 | GY   | 3B | AX.89409713 | 2.32E+07 | 0.21 | -3.19  | 3.85 | 0.06 |
| E1 | GY   | 3B | AX.89676084 | 5.56E+08 | 0.23 | -2.73  | 3.10 | 0.05 |
| E1 | GY   | 3B | AX.89676084 | 5.56E+08 | 0.23 | -2.73  | 3.10 | 0.05 |
| E1 | GY   | 3B | AX.89385111 | 8.11E+08 | 0.15 | 3.17   | 3.09 | 0.05 |
| E1 | SPM2 | 3B | AX.89557510 | 4.04E+07 | 0.31 | 17.79  | 3.08 | 0.05 |
| E1 | GY   | 3B | AX.89467096 | 7.82E+08 | 0.46 | 3.18   | 5.46 | 0.11 |
| E1 | GY   | 3B | AX.89467096 | 7.82E+08 | 0.46 | 3.18   | 5.46 | 0.11 |
| E1 | GY   | 3B | AX.89350426 | 1.27E+08 | 0.09 | 3.91   | 3.06 | 0.05 |
| E1 | GY   | 3B | AX.89350426 | 1.27E+08 | 0.09 | 3.91   | 3.06 | 0.05 |
| E1 | GY   | 3B | AX.89640549 | 7.08E+07 | 0.09 | 3.90   | 3.05 | 0.05 |
| E1 | GY   | 3B | AX.89640549 | 7.08E+07 | 0.09 | 3.90   | 3.05 | 0.05 |
| E1 | GY   | 3B | AX.89661779 | 2.33E+08 | 0.08 | 4.32   | 3.20 | 0.05 |
| E1 | GY   | 3B | AX.89350608 | 4.47E+08 | 0.12 | 3.52   | 3.11 | 0.05 |
| E1 | GY   | 3B | AX.89350608 | 4.47E+08 | 0.12 | 3.52   | 3.11 | 0.05 |
| E1 | GY   | 3B | AX.89621185 | 7.82E+08 | 0.37 | -2.74  | 3.98 | 0.07 |
| E1 | GY   | 3B | AX.89697322 | 7.03E+07 | 0.09 | 3.90   | 3.05 | 0.05 |
| E1 | GY   | 3B | AX.89707408 | 4.98E+08 | 0.44 | -2.27  | 3.03 | 0.05 |
| E1 | GY   | 3B | AX.89670424 | 2.36E+08 | 0.08 | 4.32   | 3.20 | 0.05 |
| E1 | GY   | 3B | AX.89670424 | 2.36E+08 | 0.08 | 4.32   | 3.20 | 0.05 |
| E1 | GY   | 3B | AX.89562240 | 7.08E+07 | 0.09 | 3.90   | 3.05 | 0.05 |
| E1 | GY   | 3B | AX.89550050 | 1.26E+08 | 0.09 | 3.91   | 3.06 | 0.05 |
| E1 | GY   | 3B | AX.89550050 | 1.26E+08 | 0.09 | 3.91   | 3.06 | 0.05 |
| E1 | GY   | 3B | AX.89446220 | 7.82E+08 | 0.47 | 2.99   | 4.92 | 0.09 |
| E1 | GY   | 3B | AX.89610535 | 7.95E+07 | 0.09 | 3.90   | 3.05 | 0.05 |
| E1 | GY   | 3B | AX.89387027 | 4.48E+08 | 0.11 | 3.90   | 3.50 | 0.06 |
| E1 | GY   | 3B | AX.89634987 | 5.87E+08 | 0.30 | -2.69  | 3.54 | 0.07 |
| E1 | GY   | 3B | AX.89712787 | 7.82E+08 | 0.37 | -2.75  | 3.98 | 0.07 |
| E1 | GY   | 3B | AX.89733538 | 1.58E+07 | 0.33 | 2.79   | 3.89 | 0.06 |
| E1 | GY   | 3B | AX.89457913 | 2.28E+08 | 0.08 | 4.32   | 3.20 | 0.05 |



|    |    |    |             |          |      |       |      |      |
|----|----|----|-------------|----------|------|-------|------|------|
| E1 | GY | 3B | AX.89572586 | 2.36E+08 | 0.08 | 4.32  | 3.20 | 0.05 |
| E1 | GY | 3B | AX.89549485 | 2.33E+07 | 0.21 | -3.19 | 3.85 | 0.06 |
| E1 | GY | 3B | AX.89458065 | 2.69E+07 | 0.31 | 2.56  | 3.27 | 0.05 |
| E1 | GY | 3B | AX.89478738 | 2.36E+08 | 0.08 | 4.32  | 3.20 | 0.05 |
| E1 | GY | 3B | AX.89567015 | 4.10E+07 | 0.11 | 3.64  | 3.00 | 0.05 |
| E1 | GY | 3B | AX.89537035 | 1.91E+08 | 0.09 | 4.01  | 3.07 | 0.05 |
| E1 | GY | 3B | AX.89506367 | 5.79E+08 | 0.19 | -2.96 | 3.13 | 0.05 |
| E1 | GY | 3B | AX.89616953 | 2.33E+07 | 0.21 | -3.19 | 3.85 | 0.06 |
| E1 | GY | 3B | AX.89616953 | 2.33E+07 | 0.21 | -3.19 | 3.85 | 0.06 |
| E1 | GY | 3B | AX.89459177 | 5.02E+08 | 0.48 | -2.26 | 3.04 | 0.06 |
| E1 | GY | 3B | AX.89702448 | 1.61E+07 | 0.34 | 2.63  | 3.59 | 0.05 |
| E1 | GY | 3B | AX.89702448 | 1.61E+07 | 0.34 | 2.63  | 3.59 | 0.05 |
| E1 | GY | 3B | AX.89731446 | 4.47E+08 | 0.12 | 3.52  | 3.11 | 0.05 |
| E1 | GY | 3B | AX.89593642 | 7.15E+07 | 0.09 | 3.90  | 3.05 | 0.05 |
| E1 | GY | 3B | AX.89674421 | 7.82E+08 | 0.46 | 3.05  | 5.07 | 0.10 |
| E1 | GY | 3B | AX.89735575 | 7.93E+07 | 0.09 | 3.90  | 3.05 | 0.05 |
| E1 | GY | 3B | AX.89613532 | 2.29E+08 | 0.07 | 4.74  | 3.57 | 0.06 |
| E1 | GY | 3B | AX.89743633 | 6.89E+07 | 0.09 | 3.90  | 3.05 | 0.05 |
| E1 | GY | 3B | AX.89390294 | 2.45E+07 | 0.28 | -2.64 | 3.28 | 0.05 |
| E1 | GY | 3B | AX.89648935 | 5.45E+05 | 0.06 | -5.13 | 3.26 | 0.05 |
| E1 | GY | 3B | AX.89343746 | 4.09E+07 | 0.11 | 3.64  | 3.00 | 0.05 |
| E1 | GY | 3B | AX.89682581 | 7.05E+07 | 0.09 | 3.90  | 3.05 | 0.05 |
| E1 | GY | 3B | AX.89355686 | 1.21E+08 | 0.09 | 3.91  | 3.06 | 0.05 |
| E1 | GY | 3B | AX.89603104 | 1.03E+07 | 0.44 | 2.47  | 3.48 | 0.05 |
| E1 | GY | 3B | AX.89626166 | 7.82E+08 | 0.37 | -2.74 | 3.98 | 0.07 |
| E1 | GY | 3B | AX.89626166 | 7.82E+08 | 0.37 | -2.74 | 3.98 | 0.07 |
| E1 | GY | 3B | AX.89776937 | 2.37E+07 | 0.21 | -3.19 | 3.85 | 0.06 |
| E1 | GY | 3B | AX.89587259 | 7.82E+08 | 0.48 | 2.46  | 3.49 | 0.07 |
| E1 | GY | 3B | AX.89587259 | 7.82E+08 | 0.48 | 2.46  | 3.49 | 0.07 |
| E1 | GY | 3B | AX.89643290 | 7.03E+07 | 0.09 | 3.90  | 3.05 | 0.05 |
| E1 | GY | 3B | AX.89497659 | 7.82E+08 | 0.37 | -2.74 | 3.98 | 0.07 |
| E1 | GY | 3B | AX.89749476 | 4.10E+07 | 0.11 | 3.64  | 3.00 | 0.05 |
| E1 | GY | 3B | AX.89639311 | 4.98E+08 | 0.43 | -2.43 | 3.37 | 0.06 |
| E1 | GY | 3B | AX.89623656 | 4.47E+08 | 0.12 | 3.52  | 3.11 | 0.05 |
| E1 | GY | 3B | AX.89428910 | 2.50E+08 | 0.07 | 4.99  | 3.71 | 0.06 |
| E1 | GY | 3B | AX.89428910 | 2.50E+08 | 0.07 | 4.99  | 3.71 | 0.06 |
| E1 | GY | 3B | AX.89357554 | 1.31E+08 | 0.09 | 3.91  | 3.06 | 0.05 |
| E1 | GY | 3B | AX.89324266 | 7.59E+08 | 0.26 | -2.72 | 3.30 | 0.06 |
| E1 | GY | 3B | AX.89358096 | 7.82E+08 | 0.47 | 2.84  | 4.48 | 0.09 |
| E1 | GY | 3B | AX.89640219 | 2.40E+08 | 0.08 | 4.17  | 3.14 | 0.05 |
| E1 | GY | 3B | AX.89346209 | 2.29E+08 | 0.08 | 4.32  | 3.20 | 0.05 |
| E1 | GY | 3B | AX.89542020 | 3.24E+07 | 0.46 | 2.52  | 3.64 | 0.06 |
| E1 | GY | 3B | AX.89393889 | 7.82E+08 | 0.46 | 3.18  | 5.46 | 0.11 |
| E1 | GY | 3B | AX.89325193 | 5.79E+08 | 0.19 | -3.11 | 3.46 | 0.05 |
| E1 | GY | 3B | AX.89325193 | 5.79E+08 | 0.19 | -3.11 | 3.46 | 0.05 |
| E1 | GY | 3B | AX.89569738 | 8.10E+08 | 0.17 | 3.12  | 3.26 | 0.06 |
| E1 | GY | 3B | AX.89359431 | 4.09E+07 | 0.11 | 3.64  | 3.00 | 0.05 |
| E1 | GY | 3B | AX.89501558 | 1.25E+08 | 0.09 | 3.91  | 3.06 | 0.05 |
| E1 | GY | 3B | AX.89619334 | 2.03E+08 | 0.08 | 4.12  | 3.08 | 0.05 |
| E1 | GY | 3B | AX.89619334 | 2.03E+08 | 0.08 | 4.12  | 3.08 | 0.05 |

|    |      |    |             |          |      |         |      |      |
|----|------|----|-------------|----------|------|---------|------|------|
| E1 | GY   | 3B | AX.89656360 | 4.48E+08 | 0.12 | 3.52    | 3.11 | 0.05 |
| E1 | GY   | 3B | AX.89506820 | 7.83E+08 | 0.42 | 2.79    | 4.27 | 0.08 |
| E1 | GY   | 3B | AX.89385111 | 8.11E+08 | 0.15 | 3.17    | 3.09 | 0.05 |
| E1 | GY   | 3B | AX.89743164 | 7.82E+08 | 0.37 | -2.75   | 3.98 | 0.07 |
| E1 | GY   | 3B | AX.89374324 | 7.74E+08 | 0.31 | 2.49    | 3.12 | 0.05 |
| E1 | GY   | 3B | AX.89374324 | 7.74E+08 | 0.31 | 2.49    | 3.12 | 0.05 |
| E1 | GY   | 3B | AX.89561191 | 4.47E+08 | 0.12 | 3.52    | 3.11 | 0.05 |
| E1 | GY   | 3B | AX.89666287 | 2.27E+07 | 0.20 | -3.16   | 3.67 | 0.06 |
| E1 | GY   | 3B | AX.89433995 | 2.69E+07 | 0.31 | 2.56    | 3.27 | 0.05 |
| E1 | SPM2 | 3B | AX.89729061 | 8.00E+08 | 0.40 | -20.13  | 4.23 | 0.08 |
| E1 | GY   | 3B | AX.89708070 | 1.73E+07 | 0.25 | 2.84    | 3.47 | 0.06 |
| E1 | SPM2 | 3B | AX.89517744 | 8.03E+08 | 0.40 | -22.22  | 5.04 | 0.09 |
| E1 | GPM2 | 3B | AX.89568494 | 7.84E+08 | 0.40 | -630.62 | 3.40 | 0.06 |
| E1 | SPM2 | 3B | AX.89376242 | 8.00E+08 | 0.44 | -18.45  | 3.73 | 0.06 |
| E1 | GPM2 | 3B | AX.89324266 | 7.59E+08 | 0.26 | -836.65 | 4.54 | 0.08 |
| E1 | GPM2 | 3B | AX.89527523 | 7.79E+08 | 0.27 | -702.25 | 3.45 | 0.06 |
| E1 | SPM2 | 3B | AX.89491936 | 8.01E+08 | 0.40 | -20.13  | 4.23 | 0.08 |
| E1 | GPM2 | 3B | AX.89731729 | 1.59E+07 | 0.33 | 612.32  | 3.02 | 0.05 |
| E1 | GY   | 3B | AX.89648362 | 7.82E+08 | 0.45 | 3.09    | 5.17 | 0.10 |
| E1 | GPM2 | 3B | AX.89343079 | 7.80E+08 | 0.32 | -647.99 | 3.26 | 0.05 |
| E1 | GPM2 | 3B | AX.89642355 | 7.79E+08 | 0.29 | -681.91 | 3.40 | 0.06 |
| E1 | GPM2 | 3B | AX.86168777 | 7.57E+08 | 0.31 | -633.53 | 3.09 | 0.06 |
| E1 | GPM2 | 3B | AX.89347050 | 7.79E+08 | 0.29 | -681.91 | 3.40 | 0.06 |
| E1 | GY   | 3B | AX.89686563 | 1.90E+08 | 0.09 | 4.01    | 3.07 | 0.05 |
| E1 | GPM2 | 3B | AX.89478502 | 1.03E+07 | 0.30 | -691.22 | 3.56 | 0.06 |
| E1 | GPM2 | 3B | AX.89353573 | 7.79E+08 | 0.29 | -681.91 | 3.40 | 0.06 |
| E1 | GPM2 | 3B | AX.89346210 | 9.09E+06 | 0.23 | 688.62  | 3.03 | 0.05 |
| E1 | GY   | 3B | AX.89566060 | 7.18E+06 | 0.46 | -2.30   | 3.11 | 0.05 |
| E1 | GPM2 | 3B | AX.89710866 | 1.02E+07 | 0.29 | -672.83 | 3.32 | 0.06 |
| E1 | GPM2 | 3B | AX.89524440 | 9.06E+06 | 0.36 | 875.77  | 5.86 | 0.10 |
| E1 | GPM2 | 3B | AX.89444077 | 7.79E+08 | 0.28 | -662.71 | 3.21 | 0.05 |
| E1 | GY   | 3B | AX.89662734 | 2.42E+08 | 0.07 | 4.53    | 3.31 | 0.06 |
| E1 | GY   | 3B | AX.89662734 | 2.42E+08 | 0.07 | 4.53    | 3.31 | 0.06 |
| E1 | GPM2 | 3B | AX.89667159 | 7.81E+08 | 0.32 | -647.99 | 3.26 | 0.05 |
| E1 | GY   | 3B | AX.89761468 | 5.79E+08 | 0.19 | -2.96   | 3.13 | 0.05 |
| E1 | GY   | 3B | AX.89412401 | 2.32E+07 | 0.21 | -3.19   | 3.85 | 0.06 |
| E1 | GPM2 | 3B | AX.89693634 | 7.84E+08 | 0.40 | -630.62 | 3.40 | 0.06 |
| E1 | GY   | 3B | AX.89737117 | 7.03E+07 | 0.09 | 3.90    | 3.05 | 0.05 |
| E1 | GPM2 | 3B | AX.89585449 | 7.78E+08 | 0.28 | -652.49 | 3.13 | 0.05 |
| E1 | GY   | 3B | AX.89578679 | 7.83E+08 | 0.46 | -2.67   | 4.02 | 0.07 |
| E1 | GY   | 3B | AX.89748250 | 7.03E+07 | 0.09 | 4.52    | 3.93 | 0.07 |
| E1 | GPM2 | 3B | AX.89348758 | 9.06E+06 | 0.36 | 875.77  | 5.86 | 0.10 |
| E1 | GY   | 3B | AX.89626033 | 2.27E+08 | 0.08 | 4.32    | 3.20 | 0.05 |
| E1 | GPM2 | 3B | AX.89658901 | 7.78E+08 | 0.28 | -665.44 | 3.20 | 0.05 |
| E1 | GY   | 3B | AX.89475144 | 4.45E+08 | 0.12 | 3.52    | 3.11 | 0.05 |
| E1 | GPM2 | 3B | AX.89682320 | 7.83E+08 | 0.40 | -630.62 | 3.40 | 0.06 |
| E1 | GY   | 3B | AX.89357554 | 1.31E+08 | 0.09 | 3.91    | 3.06 | 0.05 |
| E1 | GPM2 | 3B | AX.89431154 | 1.07E+07 | 0.43 | -606.21 | 3.24 | 0.05 |
| E1 | GPM2 | 3B | AX.89770084 | 7.79E+08 | 0.29 | -681.91 | 3.40 | 0.06 |
| E1 | GY   | 3B | AX.89640877 | 9.11E+06 | 0.39 | 2.36    | 3.12 | 0.05 |

|    |      |    |             |          |      |         |      |      |
|----|------|----|-------------|----------|------|---------|------|------|
| E1 | GY   | 3B | AX.89716122 | 7.01E+08 | 0.05 | -5.86   | 3.52 | 0.07 |
| E1 | GY   | 3B | AX.89606724 | 8.01E+05 | 0.07 | -4.61   | 3.06 | 0.05 |
| E1 | GY   | 3B | AX.89512828 | 7.83E+08 | 0.15 | -4.14   | 4.81 | 0.08 |
| E1 | GPM2 | 3B | AX.89688746 | 7.84E+08 | 0.40 | -630.62 | 3.40 | 0.06 |
| E1 | GPM2 | 3B | AX.89557750 | 7.79E+08 | 0.28 | -662.71 | 3.21 | 0.05 |
| E1 | GY   | 3B | AX.89647639 | 4.08E+07 | 0.11 | 3.64    | 3.00 | 0.05 |
| E1 | GPM2 | 3B | AX.89686365 | 7.80E+08 | 0.29 | -641.62 | 3.06 | 0.05 |
| E1 | GY   | 3B | AX.89509695 | 4.48E+08 | 0.12 | 3.52    | 3.11 | 0.05 |
| E1 | GPM2 | 3B | AX.89450810 | 1.60E+07 | 0.33 | 612.32  | 3.02 | 0.05 |
| E1 | GPM2 | 3B | AX.89473642 | 7.81E+08 | 0.32 | -647.99 | 3.26 | 0.05 |
| E1 | GPM2 | 3B | AX.89366224 | 1.10E+07 | 0.43 | -581.72 | 3.01 | 0.05 |
| E1 | SPM2 | 3B | AX.89509875 | 7.99E+08 | 0.39 | -20.20  | 4.24 | 0.08 |
| E1 | GY   | 3B | AX.89518919 | 4.47E+08 | 0.12 | 3.52    | 3.11 | 0.05 |
| E1 | GY   | 3B | AX.89518919 | 4.47E+08 | 0.12 | 3.52    | 3.11 | 0.05 |
| E1 | GY   | 3B | AX.89628047 | 2.03E+08 | 0.07 | 4.99    | 3.71 | 0.06 |
| E1 | GY   | 3B | AX.89628047 | 2.03E+08 | 0.07 | 4.99    | 3.71 | 0.06 |
| E1 | SPM2 | 3B | AX.89579245 | 8.01E+08 | 0.44 | -18.15  | 3.62 | 0.06 |
| E1 | GPS  | 3B | AX.89328945 | 7.64E+08 | 0.12 | 1.79    | 3.37 | 0.06 |
| E1 | GPM2 | 3B | AX.86164426 | 8.53E+06 | 0.22 | 706.05  | 3.08 | 0.05 |
| E1 | GY   | 3B | AX.89597766 | 7.84E+08 | 0.46 | -2.67   | 4.02 | 0.07 |
| E1 | GPM2 | 3B | AX.89312665 | 7.79E+08 | 0.28 | -662.71 | 3.21 | 0.05 |
| E1 | GY   | 3B | AX.89561688 | 4.47E+08 | 0.12 | 3.52    | 3.11 | 0.05 |
| E1 | GPM2 | 3B | AX.89331199 | 7.81E+08 | 0.32 | -647.99 | 3.26 | 0.05 |
| E1 | GPM2 | 3B | AX.89519170 | 7.81E+08 | 0.32 | -643.94 | 3.24 | 0.05 |
| E1 | GPM2 | 3B | AX.89669995 | 7.80E+08 | 0.32 | -647.99 | 3.26 | 0.05 |
| E1 | GPM2 | 3B | AX.89386142 | 1.61E+07 | 0.26 | 682.10  | 3.19 | 0.05 |
| E1 | GY   | 3B | AX.89712587 | 1.38E+07 | 0.24 | -3.00   | 3.73 | 0.06 |
| E1 | GPM2 | 3B | AX.89344914 | 7.99E+08 | 0.28 | -685.93 | 3.40 | 0.05 |
| E1 | GY   | 3B | AX.89376090 | 4.72E+07 | 0.17 | -3.02   | 3.07 | 0.05 |
| E1 | GY   | 3B | AX.89376090 | 4.72E+07 | 0.17 | -3.02   | 3.07 | 0.05 |
| E1 | GPM2 | 3B | AX.89712587 | 1.38E+07 | 0.24 | -690.57 | 3.12 | 0.05 |
| E1 | GY   | 3B | AX.89610917 | 2.31E+07 | 0.21 | -3.19   | 3.85 | 0.06 |
| E1 | GPM2 | 3B | AX.89364321 | 7.79E+08 | 0.29 | -681.91 | 3.40 | 0.06 |
| E1 | GPS  | 3B | AX.89478502 | 1.03E+07 | 0.30 | -1.22   | 3.16 | 0.05 |
| E1 | GY   | 3B | AX.89447089 | 8.10E+08 | 0.18 | 3.23    | 3.58 | 0.06 |
| E1 | GY   | 3B | AX.89551857 | 7.04E+07 | 0.09 | 3.90    | 3.05 | 0.05 |
| E1 | GY   | 3B | AX.89549485 | 2.33E+07 | 0.21 | -3.19   | 3.85 | 0.06 |
| E1 | GPM2 | 3B | AX.89350546 | 7.84E+08 | 0.44 | -688.14 | 4.05 | 0.07 |
| E1 | GPM2 | 3B | AX.89569738 | 8.10E+08 | 0.17 | 780.57  | 3.13 | 0.05 |
| E1 | GY   | 3B | AX.89673700 | 6.89E+07 | 0.10 | 3.97    | 3.26 | 0.06 |
| E1 | GY   | 3B | AX.89592950 | 1.91E+08 | 0.09 | 4.01    | 3.07 | 0.05 |
| E1 | GPM2 | 3B | AX.89597766 | 7.84E+08 | 0.46 | -721.10 | 4.41 | 0.07 |
| E1 | GPM2 | 3B | AX.89573300 | 7.79E+08 | 0.28 | -662.71 | 3.21 | 0.05 |
| E1 | GPM2 | 3B | AX.89611713 | 7.80E+08 | 0.28 | -673.62 | 3.30 | 0.06 |
| E1 | GPM2 | 3B | AX.89324194 | 1.03E+07 | 0.47 | -592.02 | 3.15 | 0.05 |
| E1 | GY   | 3B | AX.89438012 | 7.83E+08 | 0.15 | -4.03   | 4.57 | 0.07 |
| E1 | GY   | 3B | AX.89438012 | 7.83E+08 | 0.15 | -4.03   | 4.57 | 0.07 |
| E1 | GPM2 | 3B | AX.89442266 | 7.84E+08 | 0.40 | -630.62 | 3.40 | 0.06 |
| E1 | GY   | 3B | AX.89776937 | 2.37E+07 | 0.21 | -3.19   | 3.85 | 0.06 |
| E1 | GPM2 | 3B | AX.89520965 | 7.84E+08 | 0.46 | -701.25 | 4.20 | 0.07 |

|    |      |    |             |          |      |         |      |      |
|----|------|----|-------------|----------|------|---------|------|------|
| E1 | GY   | 3B | AX.89450810 | 1.60E+07 | 0.33 | 2.95    | 4.32 | 0.07 |
| E1 | GPM2 | 3B | AX.89319461 | 7.78E+08 | 0.31 | -648.49 | 3.22 | 0.05 |
| E1 | GY   | 3B | AX.89652048 | 7.05E+07 | 0.09 | 3.90    | 3.05 | 0.05 |
| E1 | GPM2 | 3B | AX.89451599 | 1.73E+07 | 0.43 | 678.36  | 3.93 | 0.06 |
| E1 | GY   | 3B | AX.89507261 | 7.04E+07 | 0.10 | 3.97    | 3.26 | 0.06 |
| E1 | GY   | 3B | AX.89649582 | 2.27E+08 | 0.07 | 4.74    | 3.57 | 0.06 |
| E1 | GPM2 | 3B | AX.89530695 | 7.80E+08 | 0.29 | -641.62 | 3.06 | 0.05 |
| E1 | GY   | 3B | AX.89579270 | 7.04E+07 | 0.09 | 3.90    | 3.05 | 0.05 |
| E1 | GY   | 3B | AX.89544604 | 2.30E+07 | 0.21 | -3.19   | 3.85 | 0.06 |
| E1 | GPM2 | 3B | AX.89404563 | 9.10E+06 | 0.38 | 819.97  | 5.30 | 0.09 |
| E1 | GPM2 | 3B | AX.89675810 | 7.78E+08 | 0.28 | -652.49 | 3.13 | 0.05 |
| E1 | GY   | 3B | AX.89717464 | 5.79E+08 | 0.19 | -2.96   | 3.13 | 0.05 |
| E1 | GY   | 3B | AX.89497828 | 1.61E+07 | 0.34 | 2.63    | 3.59 | 0.05 |
| E1 | GY   | 3B | AX.89750860 | 4.47E+08 | 0.12 | 3.52    | 3.11 | 0.05 |
| E1 | GY   | 3B | AX.89313251 | 2.27E+08 | 0.07 | 4.74    | 3.57 | 0.06 |
| E1 | GY   | 3B | AX.89313278 | 1.88E+08 | 0.09 | 3.91    | 3.06 | 0.05 |
| E1 | GY   | 3B | AX.89420916 | 8.11E+08 | 0.17 | 3.25    | 3.43 | 0.06 |
| E1 | GY   | 3B | AX.89676562 | 1.27E+08 | 0.09 | 3.91    | 3.06 | 0.05 |
| E1 | GPM2 | 3B | AX.89469152 | 7.80E+08 | 0.29 | -681.91 | 3.40 | 0.06 |
| E1 | GY   | 3B | AX.89546982 | 7.82E+08 | 0.37 | -2.54   | 3.48 | 0.06 |
| E1 | GPM2 | 3B | AX.89678975 | 7.79E+08 | 0.28 | -736.60 | 3.85 | 0.07 |
| E1 | GPM2 | 3B | AX.89482090 | 7.80E+08 | 0.32 | -647.99 | 3.26 | 0.05 |
| E1 | GY   | 3B | AX.89515390 | 7.03E+07 | 0.09 | 3.90    | 3.05 | 0.05 |
| E1 | GPS  | 3B | AX.89404751 | 1.03E+07 | 0.34 | -1.16   | 3.06 | 0.05 |
| E1 | GY   | 3B | AX.89477823 | 1.26E+08 | 0.09 | 3.95    | 3.11 | 0.05 |
| E1 | GY   | 3B | AX.89477823 | 1.26E+08 | 0.09 | 3.95    | 3.11 | 0.05 |
| E1 | GY   | 3B | AX.89681951 | 4.99E+08 | 0.44 | -2.27   | 3.03 | 0.05 |
| E1 | GY   | 3B | AX.89547637 | 9.41E+06 | 0.40 | -2.49   | 3.46 | 0.05 |
| E1 | GPM2 | 3B | AX.89444477 | 7.80E+08 | 0.32 | -647.99 | 3.26 | 0.05 |
| E1 | GY   | 3B | AX.89718547 | 1.30E+08 | 0.09 | 3.91    | 3.06 | 0.05 |
| E1 | GY   | 3B | AX.89708451 | 7.83E+08 | 0.46 | -2.67   | 4.02 | 0.07 |
| E1 | GPM2 | 3B | AX.89715478 | 7.79E+08 | 0.29 | -681.91 | 3.40 | 0.06 |
| E1 | GY   | 3B | AX.89512476 | 2.33E+08 | 0.08 | 4.32    | 3.20 | 0.05 |
| E1 | GY   | 3B | AX.89373893 | 7.83E+08 | 0.48 | 2.46    | 3.49 | 0.07 |
| E1 | GPM2 | 3B | AX.89509274 | 9.09E+06 | 0.49 | -582.80 | 3.08 | 0.04 |
| E1 | GPM2 | 3B | AX.89425717 | 8.11E+08 | 0.17 | 821.00  | 3.35 | 0.06 |
| E1 | GPM2 | 3B | AX.89403052 | 7.79E+08 | 0.28 | -662.71 | 3.21 | 0.05 |
| E1 | GPM2 | 3B | AX.89447307 | 9.06E+06 | 0.36 | 875.77  | 5.86 | 0.10 |
| E1 | GY   | 3B | AX.89317630 | 2.36E+08 | 0.08 | 4.32    | 3.20 | 0.05 |
| E1 | GPM2 | 3B | AX.89612830 | 7.79E+08 | 0.28 | -662.71 | 3.21 | 0.05 |
| E1 | GPM2 | 3B | AX.89417381 | 7.94E+08 | 0.28 | -662.71 | 3.21 | 0.05 |
| E1 | GPM2 | 3B | AX.89529960 | 9.05E+06 | 0.50 | -618.81 | 3.41 | 0.05 |
| E1 | GY   | 3B | AX.89504416 | 2.28E+08 | 0.08 | 4.32    | 3.20 | 0.05 |
| E1 | GY   | 3B | AX.89708291 | 7.82E+08 | 0.46 | 3.18    | 5.46 | 0.11 |
| E1 | GPM2 | 3B | AX.89511158 | 7.79E+08 | 0.28 | -662.71 | 3.21 | 0.05 |
| E1 | GY   | 3B | AX.89622367 | 6.19E+08 | 0.27 | 2.60    | 3.10 | 0.05 |
| E1 | GY   | 3B | AX.89622367 | 6.19E+08 | 0.27 | 2.60    | 3.10 | 0.05 |
| E1 | GPM2 | 3B | AX.89396277 | 1.03E+07 | 0.29 | -672.83 | 3.32 | 0.06 |
| E1 | GY   | 3B | AX.89352945 | 7.82E+08 | 0.36 | -2.47   | 3.30 | 0.06 |
| E1 | GY   | 3B | AX.89572586 | 2.36E+08 | 0.08 | 4.32    | 3.20 | 0.05 |

|    |      |    |             |          |      |         |      |      |
|----|------|----|-------------|----------|------|---------|------|------|
| E1 | GPM2 | 3B | AX.89671073 | 8.69E+06 | 0.23 | 688.62  | 3.03 | 0.05 |
| E1 | GY   | 3B | AX.89458065 | 2.69E+07 | 0.31 | 2.56    | 3.27 | 0.05 |
| E1 | GY   | 3B | AX.89695720 | 4.39E+07 | 0.10 | -4.84   | 4.59 | 0.09 |
| E1 | GY   | 3B | AX.89695720 | 4.39E+07 | 0.10 | -4.84   | 4.59 | 0.09 |
| E1 | GY   | 3B | AX.89709938 | 4.09E+07 | 0.11 | 3.64    | 3.00 | 0.05 |
| E1 | GPM2 | 3B | AX.89537790 | 3.23E+07 | 0.20 | 759.73  | 3.35 | 0.05 |
| E1 | GY   | 3B | AX.89567015 | 4.10E+07 | 0.11 | 3.64    | 3.00 | 0.05 |
| E1 | GPM2 | 3B | AX.89535981 | 7.80E+08 | 0.32 | -647.99 | 3.26 | 0.05 |
| E1 | GY   | 3B | AX.89598717 | 4.47E+08 | 0.12 | 3.52    | 3.11 | 0.05 |
| E1 | GY   | 3B | AX.89598717 | 4.47E+08 | 0.12 | 3.52    | 3.11 | 0.05 |
| E1 | GPM2 | 3B | AX.89702431 | 8.88E+06 | 0.48 | -579.68 | 3.05 | 0.04 |
| E1 | GY   | 3B | AX.89320718 | 7.82E+08 | 0.36 | -2.58   | 3.54 | 0.06 |
| E1 | GY   | 3B | AX.89731446 | 4.47E+08 | 0.12 | 3.52    | 3.11 | 0.05 |
| E1 | GPM2 | 3B | AX.89708451 | 7.83E+08 | 0.46 | -721.10 | 4.41 | 0.07 |
| E1 | GY   | 3B | AX.89425717 | 8.11E+08 | 0.17 | 3.25    | 3.43 | 0.06 |
| E1 | GPM2 | 3B | AX.89585986 | 7.83E+08 | 0.15 | -839.22 | 3.21 | 0.05 |
| E1 | GY   | 3B | AX.89747835 | 7.03E+07 | 0.09 | 3.90    | 3.05 | 0.05 |
| E1 | GY   | 3B | AX.89648935 | 5.45E+05 | 0.06 | -5.13   | 3.26 | 0.05 |
| E1 | GPM2 | 3B | AX.89397930 | 7.79E+08 | 0.29 | -681.91 | 3.40 | 0.06 |
| E1 | GY   | 3B | AX.89672215 | 7.83E+08 | 0.48 | 2.46    | 3.49 | 0.07 |
| E1 | GY   | 3B | AX.89587730 | 2.36E+07 | 0.28 | -2.64   | 3.28 | 0.05 |
| E1 | GY   | 3B | AX.89587730 | 2.36E+07 | 0.28 | -2.64   | 3.28 | 0.05 |
| E1 | GY   | 3B | AX.89324194 | 1.03E+07 | 0.47 | -2.62   | 3.90 | 0.06 |
| E1 | GY   | 3B | AX.89462944 | 2.28E+08 | 0.08 | 4.32    | 3.20 | 0.05 |
| E1 | GY   | 3B | AX.89703117 | 4.48E+08 | 0.12 | 3.75    | 3.37 | 0.06 |
| E1 | GY   | 3B | AX.89735675 | 7.82E+08 | 0.37 | -2.74   | 3.98 | 0.07 |
| E1 | GY   | 3B | AX.89431154 | 1.07E+07 | 0.43 | -2.29   | 3.06 | 0.05 |
| E1 | GY   | 3B | AX.89656360 | 4.48E+08 | 0.12 | 3.52    | 3.11 | 0.05 |
| E1 | GY   | 3B | AX.89506820 | 7.83E+08 | 0.42 | 2.79    | 4.27 | 0.08 |
| E1 | GY   | 3B | AX.89433585 | 1.27E+08 | 0.09 | 3.91    | 3.06 | 0.05 |
| E1 | GY   | 3B | AX.89609467 | 7.81E+08 | 0.36 | -2.74   | 3.95 | 0.07 |
| E1 | GY   | 3B | AX.89456542 | 7.01E+07 | 0.09 | 3.90    | 3.05 | 0.05 |
| E1 | GPM2 | 3B | AX.89445456 | 7.79E+08 | 0.28 | -736.60 | 3.85 | 0.07 |
| E1 | GPM2 | 3B | AX.89346962 | 1.73E+07 | 0.28 | 678.34  | 3.31 | 0.06 |
| E1 | GPM2 | 3B | AX.89406016 | 1.73E+07 | 0.24 | 678.83  | 3.06 | 0.05 |
| E1 | GY   | 3B | AX.89479047 | 2.26E+08 | 0.08 | 4.32    | 3.20 | 0.05 |
| E1 | GPM2 | 3B | AX.89723221 | 7.79E+08 | 0.28 | -662.71 | 3.21 | 0.05 |
| E1 | GPM2 | 3B | AX.89613009 | 2.28E+07 | 0.35 | -621.38 | 3.16 | 0.05 |
| E1 | GPM2 | 3B | AX.89310735 | 7.84E+08 | 0.40 | -630.62 | 3.40 | 0.06 |
| E1 | GPM2 | 3B | AX.89570689 | 7.80E+08 | 0.29 | -641.62 | 3.06 | 0.05 |
| E1 | GPM2 | 3B | AX.89447089 | 8.10E+08 | 0.18 | 769.74  | 3.17 | 0.05 |
| E1 | GY   | 3B | AX.89412401 | 2.32E+07 | 0.21 | -3.19   | 3.85 | 0.06 |
| E1 | GPM2 | 3B | AX.89552393 | 7.81E+08 | 0.32 | -647.99 | 3.26 | 0.05 |
| E1 | GPM2 | 3B | AX.89388524 | 1.03E+07 | 0.30 | -670.63 | 3.36 | 0.06 |
| E1 | GPM2 | 3B | AX.89578679 | 7.83E+08 | 0.46 | -721.10 | 4.41 | 0.07 |
| E1 | GPM2 | 3B | AX.89640753 | 7.81E+08 | 0.32 | -647.99 | 3.26 | 0.05 |
| E1 | SPM2 | 3B | AX.89655431 | 8.00E+08 | 0.40 | -20.13  | 4.23 | 0.08 |
| E1 | GPM2 | 3B | AX.89612085 | 7.80E+08 | 0.32 | -647.99 | 3.26 | 0.05 |
| E1 | GPM2 | 3B | AX.86184460 | 7.78E+08 | 0.29 | -681.91 | 3.40 | 0.06 |
| E1 | GPM2 | 3B | AX.89334115 | 7.79E+08 | 0.28 | -662.71 | 3.21 | 0.05 |

|    |      |    |             |          |      |         |      |      |
|----|------|----|-------------|----------|------|---------|------|------|
| E1 | GPM2 | 3B | AX.89621691 | 1.07E+07 | 0.43 | -584.98 | 3.04 | 0.05 |
| E1 | GPM2 | 3B | AX.89350549 | 7.79E+08 | 0.28 | -662.71 | 3.21 | 0.05 |
| E1 | GPM2 | 3B | AX.89640877 | 9.11E+06 | 0.39 | 767.69  | 4.73 | 0.08 |
| E1 | GY   | 3B | AX.89432992 | 7.82E+08 | 0.47 | 2.99    | 4.92 | 0.09 |
| E1 | GPM2 | 3B | AX.89732442 | 7.83E+08 | 0.14 | -849.51 | 3.13 | 0.05 |
| E1 | GPM2 | 3B | AX.89397659 | 7.80E+08 | 0.29 | -641.62 | 3.06 | 0.05 |
| E1 | GPM2 | 3B | AX.89632308 | 8.88E+06 | 0.22 | 751.75  | 3.48 | 0.06 |
| E1 | GPM2 | 3B | AX.89775990 | 7.79E+08 | 0.29 | -681.91 | 3.40 | 0.06 |
| E1 | GPM2 | 3B | AX.89628117 | 7.80E+08 | 0.32 | -647.99 | 3.26 | 0.05 |
| E1 | GPS  | 3B | AX.89684282 | 6.24E+06 | 0.20 | 1.49    | 3.55 | 0.06 |
| E1 | GPM2 | 3B | AX.89652742 | 7.78E+08 | 0.28 | -662.71 | 3.21 | 0.05 |
| E1 | GPM2 | 3B | AX.89473109 | 7.84E+08 | 0.40 | -630.62 | 3.40 | 0.06 |
| E1 | GPM2 | 3B | AX.89426226 | 7.81E+08 | 0.32 | -647.99 | 3.26 | 0.05 |
| E1 | GPM2 | 3B | AX.89486900 | 7.81E+08 | 0.32 | -644.25 | 3.25 | 0.05 |
| E1 | GPM2 | 3B | AX.89335703 | 1.03E+07 | 0.30 | -670.63 | 3.36 | 0.06 |
| E1 | GY   | 3B | AX.89673700 | 6.89E+07 | 0.10 | 3.97    | 3.26 | 0.06 |
| E1 | GPM2 | 3B | AX.89562306 | 7.78E+08 | 0.28 | -662.71 | 3.21 | 0.05 |
| E1 | GY   | 3B | AX.89701197 | 1.25E+08 | 0.09 | 3.91    | 3.06 | 0.05 |
| E1 | GY   | 3B | AX.89724263 | 7.82E+08 | 0.37 | -2.74   | 3.98 | 0.07 |
| E1 | GPM2 | 3B | AX.89363834 | 7.78E+08 | 0.28 | -736.60 | 3.85 | 0.07 |
| E1 | GPM2 | 3B | AX.89419440 | 7.78E+08 | 0.28 | -652.49 | 3.13 | 0.05 |
| E1 | GY   | 3B | AX.89652048 | 7.05E+07 | 0.09 | 3.90    | 3.05 | 0.05 |
| E1 | GPM2 | 3B | AX.89492440 | 7.79E+08 | 0.28 | -662.71 | 3.21 | 0.05 |
| E1 | GPM2 | 3B | AX.89438012 | 7.83E+08 | 0.15 | -841.49 | 3.22 | 0.05 |
| E1 | GY   | 3B | AX.89381129 | 2.40E+08 | 0.08 | 4.17    | 3.14 | 0.05 |
| E1 | GPM2 | 3B | AX.89684935 | 7.79E+08 | 0.28 | -662.71 | 3.21 | 0.05 |
| E1 | GPM2 | 3B | AX.89718794 | 1.07E+07 | 0.43 | -606.21 | 3.24 | 0.05 |
| E1 | GPM2 | 3B | AX.89488281 | 7.84E+08 | 0.40 | -630.62 | 3.40 | 0.06 |
| E1 | TKW  | 3B | AX.89576618 | 7.81E+08 | 0.22 | -1.23   | 4.29 | 0.08 |
| E1 | GY   | 3B | AX.89704353 | 3.78E+08 | 0.14 | 3.21    | 3.02 | 0.05 |
| E1 | GPM2 | 3B | AX.89591832 | 7.60E+08 | 0.28 | -736.60 | 3.85 | 0.07 |
| E1 | GPM2 | 3B | AX.89717332 | 7.79E+08 | 0.28 | -662.71 | 3.21 | 0.05 |
| E1 | GPM2 | 3B | AX.89749397 | 7.80E+08 | 0.30 | -634.05 | 3.05 | 0.05 |
| E1 | GPM2 | 3B | AX.89516673 | 7.78E+08 | 0.28 | -665.44 | 3.20 | 0.05 |
| E1 | GPM2 | 3B | AX.89708070 | 1.73E+07 | 0.25 | 736.90  | 3.56 | 0.06 |
| E1 | GPM2 | 3B | AX.89695048 | 7.79E+08 | 0.29 | -681.91 | 3.40 | 0.06 |
| E1 | GPM2 | 3B | AX.89402274 | 7.79E+08 | 0.29 | -681.91 | 3.40 | 0.06 |
| E1 | GPM2 | 3B | AX.89771587 | 7.79E+08 | 0.29 | -681.91 | 3.40 | 0.06 |
| E1 | GY   | 3B | AX.89718794 | 1.07E+07 | 0.43 | -2.29   | 3.06 | 0.05 |
| E1 | GPM2 | 3B | AX.89730557 | 7.56E+08 | 0.23 | -680.20 | 3.00 | 0.06 |
| E1 | GPM2 | 3B | AX.89512828 | 7.83E+08 | 0.15 | -839.22 | 3.21 | 0.05 |
| E1 | GY   | 3B | AX.89352945 | 7.82E+08 | 0.36 | -2.47   | 3.30 | 0.06 |
| E1 | GPM2 | 3B | AX.89719543 | 1.02E+07 | 0.29 | -672.83 | 3.32 | 0.06 |
| E1 | TKW  | 3B | AX.89500032 | 5.89E+06 | 0.16 | 1.21    | 3.34 | 0.06 |
| E1 | TKW  | 3B | AX.89436601 | 6.67E+07 | 0.10 | -1.52   | 3.47 | 0.06 |
| E1 | TKW  | 3B | AX.89520178 | 6.68E+07 | 0.10 | -1.54   | 3.69 | 0.06 |
| E1 | GPM2 | 3B | AX.89406443 | 7.81E+08 | 0.32 | -647.99 | 3.26 | 0.05 |
| E1 | GY   | 3B | AX.89593642 | 7.15E+07 | 0.09 | 3.90    | 3.05 | 0.05 |
| E1 | TKW  | 3B | AX.89316012 | 7.82E+08 | 0.38 | -0.92   | 3.42 | 0.06 |
| E1 | GPM2 | 3B | AX.89725034 | 7.81E+08 | 0.31 | -710.54 | 3.76 | 0.06 |

|    |      |    |             |          |      |         |      |      |
|----|------|----|-------------|----------|------|---------|------|------|
| E1 | GPM2 | 3B | AX.89698718 | 7.94E+08 | 0.26 | -681.50 | 3.22 | 0.05 |
| E1 | GY   | 3B | AX.89743633 | 6.89E+07 | 0.09 | 3.90    | 3.05 | 0.05 |
| E1 | GPM2 | 3B | AX.89488878 | 7.79E+08 | 0.28 | -662.71 | 3.21 | 0.05 |
| E1 | GY   | 3B | AX.89744326 | 4.06E+07 | 0.11 | 3.64    | 3.00 | 0.05 |
| E1 | TKW  | 3B | AX.89621185 | 7.82E+08 | 0.37 | -0.88   | 3.17 | 0.05 |
| E1 | TKW  | 3B | AX.89546982 | 7.82E+08 | 0.37 | -0.86   | 3.00 | 0.05 |
| E1 | TKW  | 3B | AX.89714524 | 7.82E+08 | 0.37 | -0.88   | 3.17 | 0.05 |
| E1 | TKW  | 3B | AX.89352945 | 7.82E+08 | 0.36 | -0.91   | 3.29 | 0.06 |
| E1 | GY   | 3B | AX.89357134 | 2.28E+08 | 0.07 | 4.74    | 3.57 | 0.06 |
| E1 | TKW  | 3B | AX.89667416 | 5.89E+06 | 0.19 | 1.20    | 3.75 | 0.07 |
| E1 | GY   | 3B | AX.89327655 | 7.03E+07 | 0.09 | 3.90    | 3.05 | 0.05 |
| E1 | GPM2 | 3B | AX.89724483 | 8.53E+06 | 0.22 | 706.05  | 3.08 | 0.05 |
| E1 | TKW  | 3B | AX.89582655 | 5.95E+06 | 0.16 | 1.21    | 3.34 | 0.06 |
| E1 | TKW  | 3B | AX.89549698 | 7.82E+08 | 0.37 | -0.88   | 3.17 | 0.05 |
| E1 | TKW  | 3B | AX.89625540 | 7.82E+08 | 0.37 | -0.88   | 3.12 | 0.05 |
| E1 | GY   | 3B | AX.89708796 | 4.48E+08 | 0.12 | 3.75    | 3.37 | 0.06 |
| E1 | TKW  | 3B | AX.89352330 | 5.59E+06 | 0.16 | 1.16    | 3.19 | 0.05 |
| E1 | SPM2 | 3B | AX.89627455 | 7.99E+08 | 0.41 | -18.79  | 3.78 | 0.07 |
| E1 | TKW  | 3B | AX.89482460 | 7.82E+08 | 0.37 | -0.88   | 3.12 | 0.05 |
| E1 | TKW  | 3B | AX.89650372 | 5.95E+06 | 0.16 | 1.21    | 3.34 | 0.06 |
| E1 | TKW  | 3B | AX.89609467 | 7.81E+08 | 0.36 | -0.88   | 3.13 | 0.05 |
| E1 | TKW  | 3B | AX.89626166 | 7.82E+08 | 0.37 | -0.88   | 3.17 | 0.05 |
| E1 | TKW  | 3B | AX.89603356 | 7.83E+08 | 0.21 | -1.44   | 5.48 | 0.10 |
| E1 | TKW  | 3B | AX.89431787 | 7.81E+08 | 0.22 | -1.23   | 4.29 | 0.08 |
| E1 | TKW  | 3B | AX.89743164 | 7.82E+08 | 0.37 | -0.88   | 3.12 | 0.05 |
| E1 | GY   | 3B | AX.89726612 | 1.91E+08 | 0.09 | 4.01    | 3.07 | 0.05 |
| E1 | TKW  | 3B | AX.89415162 | 8.22E+08 | 0.40 | -0.96   | 3.76 | 0.07 |
| E1 | TKW  | 3B | AX.89336987 | 7.82E+08 | 0.37 | -0.88   | 3.17 | 0.05 |
| E1 | TKW  | 3B | AX.89689905 | 7.81E+08 | 0.23 | -1.21   | 4.30 | 0.08 |
| E1 | TKW  | 3B | AX.89497659 | 7.82E+08 | 0.37 | -0.88   | 3.17 | 0.05 |
| E1 | TKW  | 3B | AX.89396850 | 7.82E+08 | 0.37 | -0.92   | 3.37 | 0.06 |
| E1 | GY   | 3B | AX.89647639 | 4.08E+07 | 0.11 | 3.64    | 3.00 | 0.05 |
| E1 | GY   | 3B | AX.89509695 | 4.48E+08 | 0.12 | 3.52    | 3.11 | 0.05 |
| E1 | TKW  | 3B | AX.89489735 | 7.82E+08 | 0.37 | -0.88   | 3.12 | 0.05 |
| E1 | TKW  | 3B | AX.89677381 | 5.89E+06 | 0.17 | 1.18    | 3.32 | 0.06 |
| E1 | TKW  | 3B | AX.89764435 | 7.21E+08 | 0.13 | -1.32   | 3.29 | 0.06 |
| E1 | GPM2 | 3B | AX.89526313 | 1.06E+07 | 0.43 | -584.98 | 3.04 | 0.05 |
| E1 | TKW  | 3B | AX.89712787 | 7.82E+08 | 0.37 | -0.88   | 3.12 | 0.05 |
| E1 | GY   | 3B | AX.89482460 | 7.82E+08 | 0.37 | -2.75   | 3.98 | 0.07 |
| E1 | TKW  | 3B | AX.89752358 | 5.67E+06 | 0.16 | 1.20    | 3.35 | 0.06 |
| E1 | GPM2 | 3B | AX.89437605 | 7.80E+08 | 0.27 | -697.12 | 3.44 | 0.06 |
| E1 | TKW  | 3B | AX.89623881 | 7.81E+08 | 0.22 | -1.23   | 4.29 | 0.08 |
| E1 | TKW  | 3B | AX.89569831 | 7.82E+08 | 0.37 | -0.88   | 3.12 | 0.05 |
| E1 | TKW  | 3B | AX.86162701 | 6.67E+07 | 0.10 | -1.52   | 3.47 | 0.06 |
| E1 | TKW  | 3B | AX.89535127 | 5.95E+06 | 0.19 | 1.20    | 3.75 | 0.07 |
| E1 | GPM2 | 3B | AX.89420916 | 8.11E+08 | 0.17 | 821.00  | 3.35 | 0.06 |
| E1 | GPM2 | 3B | AX.89471698 | 7.80E+08 | 0.32 | -647.99 | 3.26 | 0.05 |
| E1 | TKW  | 3B | AX.89706937 | 7.82E+08 | 0.37 | -0.89   | 3.18 | 0.05 |
| E1 | TKW  | 3B | AX.89402216 | 6.67E+07 | 0.10 | -1.52   | 3.47 | 0.06 |
| E1 | TKW  | 3B | AX.89385248 | 5.95E+06 | 0.16 | 1.21    | 3.34 | 0.06 |

|    |      |    |             |          |      |        |      |      |
|----|------|----|-------------|----------|------|--------|------|------|
| E1 | TKW  | 3B | AX.89735675 | 7.82E+08 | 0.37 | -0.88  | 3.17 | 0.05 |
| E1 | TKW  | 3B | AX.89617963 | 6.68E+07 | 0.10 | -1.52  | 3.47 | 0.06 |
| E1 | TKW  | 3B | AX.89692867 | 7.82E+08 | 0.37 | -0.88  | 3.17 | 0.05 |
| E1 | TKW  | 3B | AX.89724263 | 7.82E+08 | 0.37 | -0.88  | 3.17 | 0.05 |
| E1 | TKW  | 3B | AX.89465739 | 7.82E+08 | 0.37 | -0.88  | 3.17 | 0.05 |
| E1 | TKW  | 3B | AX.86169570 | 6.52E+07 | 0.11 | -1.65  | 4.46 | 0.08 |
| E2 | SPM2 | 3B | AX.89616723 | 8.04E+08 | 0.30 | 12.87  | 3.12 | 0.05 |
| E2 | SPM2 | 3B | AX.89733548 | 7.88E+08 | 0.39 | -13.33 | 3.67 | 0.07 |
| E2 | SPM2 | 3B | AX.86170407 | 7.57E+08 | 0.30 | -13.07 | 3.20 | 0.06 |
| E2 | SPM2 | 3B | AX.89485134 | 2.46E+07 | 0.19 | 19.73  | 4.91 | 0.09 |
| E2 | GY   | 3B | AX.89708404 | 7.49E+08 | 0.11 | -3.25  | 3.38 | 0.04 |
| E2 | GY   | 3B | AX.89412494 | 5.51E+08 | 0.09 | -3.55  | 3.38 | 0.04 |
| E2 | GY   | 3B | AX.89412494 | 5.51E+08 | 0.09 | -3.55  | 3.38 | 0.04 |
| E2 | SPM2 | 3B | AX.89513892 | 7.88E+08 | 0.39 | -13.33 | 3.67 | 0.07 |
| E2 | SPM2 | 3B | AX.89422036 | 2.44E+07 | 0.09 | 19.96  | 3.02 | 0.05 |
| E2 | SPM2 | 3B | AX.89617988 | 7.88E+08 | 0.38 | -12.28 | 3.15 | 0.06 |
| E2 | SPM2 | 3B | AX.89723222 | 2.99E+07 | 0.22 | 18.90  | 5.06 | 0.09 |
| E2 | GY   | 3B | AX.89647962 | 4.98E+08 | 0.41 | -2.18  | 3.76 | 0.07 |
| E2 | GY   | 3B | AX.89647962 | 4.98E+08 | 0.41 | -2.18  | 3.76 | 0.07 |
| E2 | SPM2 | 3B | AX.89549213 | 7.88E+08 | 0.39 | -13.33 | 3.67 | 0.07 |
| E2 | SPM2 | 3B | AX.89414924 | 7.88E+08 | 0.38 | -12.28 | 3.15 | 0.06 |
| E2 | GY   | 3B | AX.89459177 | 5.02E+08 | 0.48 | -1.90  | 3.06 | 0.06 |
| E2 | SPM2 | 3B | AX.89665225 | 7.88E+08 | 0.39 | -13.33 | 3.67 | 0.07 |
| E2 | GY   | 3B | AX.89366640 | 2.51E+07 | 0.23 | -2.45  | 3.61 | 0.06 |
| E2 | SPM2 | 3B | AX.89544549 | 4.70E+08 | 0.09 | 22.46  | 3.55 | 0.06 |
| E2 | SPM2 | 3B | AX.89409920 | 2.45E+07 | 0.23 | 18.32  | 4.92 | 0.09 |
| E2 | TKW  | 3B | AX.89746044 | 7.24E+08 | 0.35 | -0.95  | 3.07 | 0.06 |
| E2 | SPM2 | 3B | AX.89334546 | 7.88E+08 | 0.39 | -13.01 | 3.50 | 0.06 |
| E2 | SPM2 | 3B | AX.89660660 | 7.71E+08 | 0.22 | -14.76 | 3.33 | 0.06 |
| E2 | SPM2 | 3B | AX.89436721 | 7.88E+08 | 0.38 | -12.28 | 3.15 | 0.06 |
| E2 | SPM2 | 3B | AX.89347051 | 7.88E+08 | 0.37 | 12.24  | 3.11 | 0.05 |
| E2 | SPM2 | 3B | AX.89599926 | 7.88E+08 | 0.37 | 12.24  | 3.11 | 0.05 |
| E2 | SPM2 | 3B | AX.89507462 | 7.88E+08 | 0.39 | -13.33 | 3.67 | 0.07 |
| E2 | SPM2 | 3B | AX.89366611 | 7.88E+08 | 0.37 | 12.24  | 3.11 | 0.05 |
| E2 | SPM2 | 3B | AX.89315807 | 7.88E+08 | 0.39 | -13.25 | 3.63 | 0.07 |
| E2 | SPM2 | 3B | AX.89351074 | 2.47E+07 | 0.19 | 19.73  | 4.91 | 0.09 |
| E2 | SPM2 | 3B | AX.89677428 | 7.88E+08 | 0.37 | 12.24  | 3.11 | 0.05 |
| E2 | SPM2 | 3B | AX.89387995 | 4.71E+08 | 0.07 | 24.16  | 3.34 | 0.06 |
| E2 | GY   | 3B | AX.89714336 | 7.47E+08 | 0.11 | -3.25  | 3.38 | 0.04 |
| E2 | SPM2 | 3B | AX.89628799 | 2.46E+07 | 0.19 | 19.73  | 4.91 | 0.09 |
| E2 | SPM2 | 3B | AX.89485019 | 8.04E+08 | 0.26 | 13.49  | 3.13 | 0.05 |
| E2 | SPM2 | 3B | AX.89624504 | 5.02E+07 | 0.05 | 26.43  | 3.04 | 0.05 |
| E2 | SPM2 | 3B | AX.89641049 | 3.03E+07 | 0.17 | 20.48  | 4.97 | 0.09 |
| E2 | SPM2 | 3B | AX.89729494 | 7.88E+08 | 0.39 | -13.33 | 3.67 | 0.07 |
| E2 | GY   | 3B | AX.89442003 | 2.50E+07 | 0.11 | -4.32  | 5.81 | 0.08 |
| E2 | SPM2 | 3B | AX.89416738 | 7.88E+08 | 0.40 | -12.92 | 3.49 | 0.06 |
| E2 | SPM2 | 3B | AX.89334477 | 2.90E+08 | 0.06 | 30.20  | 4.38 | 0.08 |
| E2 | GY   | 3B | AX.89371943 | 4.99E+08 | 0.43 | -1.92  | 3.05 | 0.05 |
| E2 | SPM2 | 3B | AX.89485976 | 7.88E+08 | 0.39 | -13.01 | 3.50 | 0.06 |
| E2 | SPM2 | 3B | AX.89574706 | 7.88E+08 | 0.38 | -12.28 | 3.15 | 0.06 |



|    |      |    |             |          |      |         |      |      |
|----|------|----|-------------|----------|------|---------|------|------|
| E2 | SPM2 | 3B | AX.89648148 | 2.46E+07 | 0.20 | 15.29   | 3.30 | 0.06 |
| E2 | SPM2 | 3B | AX.89354127 | 7.88E+08 | 0.39 | -13.33  | 3.67 | 0.07 |
| E2 | SPM2 | 3B | AX.89392777 | 7.88E+08 | 0.22 | -15.93  | 3.80 | 0.07 |
| E2 | SPM2 | 3B | AX.89453789 | 7.88E+08 | 0.36 | 12.28   | 3.11 | 0.05 |
| E2 | SPM2 | 3B | AX.89385397 | 8.19E+08 | 0.07 | 24.05   | 3.14 | 0.05 |
| E2 | SPM2 | 3B | AX.89386935 | 7.69E+08 | 0.48 | 12.76   | 3.55 | 0.06 |
| E2 | SPM2 | 3B | AX.89632021 | 7.71E+08 | 0.49 | 11.61   | 3.02 | 0.05 |
| E2 | SPM2 | 3B | AX.89595574 | 7.88E+08 | 0.40 | -12.57  | 3.33 | 0.06 |
| E2 | SPM2 | 3B | AX.89458103 | 7.88E+08 | 0.40 | -13.83  | 3.93 | 0.07 |
| E2 | GY   | 3B | AX.89683325 | 2.49E+07 | 0.11 | -4.40   | 5.80 | 0.08 |
| E2 | GY   | 3B | AX.89683325 | 2.49E+07 | 0.11 | -4.40   | 5.80 | 0.08 |
| E2 | GY   | 3B | AX.89559935 | 2.49E+07 | 0.09 | -3.79   | 4.00 | 0.05 |
| E2 | GY   | 3B | AX.89559935 | 2.49E+07 | 0.09 | -3.79   | 4.00 | 0.05 |
| E2 | GY   | 3B | AX.89662130 | 2.51E+07 | 0.11 | -4.40   | 5.80 | 0.08 |
| E2 | GY   | 3B | AX.89662130 | 2.51E+07 | 0.11 | -4.40   | 5.80 | 0.08 |
| E2 | GY   | 3B | AX.89415429 | 7.49E+08 | 0.11 | -3.25   | 3.38 | 0.04 |
| E2 | GY   | 3B | AX.89311113 | 7.49E+08 | 0.11 | -3.25   | 3.38 | 0.04 |
| E2 | GY   | 3B | AX.89311113 | 7.49E+08 | 0.11 | -3.25   | 3.38 | 0.04 |
| E2 | GY   | 3B | AX.89510036 | 7.48E+08 | 0.11 | -3.25   | 3.38 | 0.04 |
| E2 | GY   | 3B | AX.89510036 | 7.48E+08 | 0.11 | -3.25   | 3.38 | 0.04 |
| E2 | GY   | 3B | AX.89311427 | 4.98E+08 | 0.43 | -1.97   | 3.21 | 0.05 |
| E2 | GY   | 3B | AX.89311427 | 4.98E+08 | 0.43 | -1.97   | 3.21 | 0.05 |
| E2 | GY   | 3B | AX.89627057 | 2.49E+07 | 0.15 | -2.63   | 3.09 | 0.06 |
| E2 | GY   | 3B | AX.89627057 | 2.49E+07 | 0.15 | -2.63   | 3.09 | 0.06 |
| E2 | GY   | 3B | AX.89357555 | 2.51E+07 | 0.13 | -3.26   | 3.93 | 0.05 |
| E2 | GY   | 3B | AX.89451868 | 7.50E+08 | 0.06 | -4.89   | 4.04 | 0.05 |
| E2 | GY   | 3B | AX.89451868 | 7.50E+08 | 0.06 | -4.89   | 4.04 | 0.05 |
| E2 | GY   | 3B | AX.89500820 | 2.51E+07 | 0.10 | -3.71   | 4.13 | 0.06 |
| E2 | GY   | 3B | AX.89500820 | 2.51E+07 | 0.10 | -3.71   | 4.13 | 0.06 |
| E2 | GY   | 3B | AX.89419406 | 2.49E+07 | 0.11 | -4.40   | 5.80 | 0.08 |
| E2 | GY   | 3B | AX.89419406 | 2.49E+07 | 0.11 | -4.40   | 5.80 | 0.08 |
| E2 | GY   | 3B | AX.89372430 | 2.51E+07 | 0.11 | -4.40   | 5.80 | 0.08 |
| E2 | GY   | 3B | AX.89372430 | 2.51E+07 | 0.11 | -4.40   | 5.80 | 0.08 |
| E2 | GY   | 3B | AX.89361709 | 2.49E+07 | 0.25 | -2.28   | 3.24 | 0.04 |
| E2 | GY   | 3B | AX.89455482 | 4.97E+08 | 0.42 | -1.93   | 3.05 | 0.05 |
| E2 | GY   | 3B | AX.89455482 | 4.97E+08 | 0.42 | -1.93   | 3.05 | 0.05 |
| E2 | GY   | 3B | AX.89339028 | 2.51E+07 | 0.11 | -4.40   | 5.80 | 0.08 |
| E2 | GY   | 3B | AX.89339028 | 2.51E+07 | 0.11 | -4.40   | 5.80 | 0.08 |
| E2 | GY   | 3B | AX.89773338 | 7.47E+08 | 0.11 | -3.25   | 3.38 | 0.04 |
| E2 | GY   | 3B | AX.89773338 | 7.47E+08 | 0.11 | -3.25   | 3.38 | 0.04 |
| E2 | GPM2 | 3B | AX.89776719 | 4.32E+06 | 0.17 | -641.04 | 3.04 | 0.05 |
| E2 | GY   | 3B | AX.89577476 | 7.47E+08 | 0.11 | -3.25   | 3.38 | 0.04 |
| E2 | GY   | 3B | AX.89415429 | 7.49E+08 | 0.11 | -3.25   | 3.38 | 0.04 |
| E2 | GY   | 3B | AX.89716122 | 7.01E+08 | 0.05 | -6.56   | 5.96 | 0.12 |
| E2 | GY   | 3B | AX.89716122 | 7.01E+08 | 0.05 | -6.56   | 5.96 | 0.12 |
| E2 | GY   | 3B | AX.89357555 | 2.51E+07 | 0.13 | -3.26   | 3.93 | 0.05 |
| E2 | GY   | 3B | AX.89512828 | 7.83E+08 | 0.15 | -2.86   | 3.42 | 0.05 |
| E2 | GY   | 3B | AX.89442003 | 2.50E+07 | 0.11 | -4.32   | 5.81 | 0.08 |
| E2 | GY   | 3B | AX.89327129 | 3.45E+08 | 0.26 | -2.39   | 3.65 | 0.06 |
| E2 | GY   | 3B | AX.89327129 | 3.45E+08 | 0.26 | -2.39   | 3.65 | 0.06 |

|    |      |    |             |          |      |        |      |      |
|----|------|----|-------------|----------|------|--------|------|------|
| E2 | GY   | 3B | AX.89502384 | 7.49E+08 | 0.10 | -3.37  | 3.48 | 0.04 |
| E2 | GY   | 3B | AX.89502384 | 7.49E+08 | 0.10 | -3.37  | 3.48 | 0.04 |
| E2 | GY   | 3B | AX.89361709 | 2.49E+07 | 0.25 | -2.28  | 3.24 | 0.04 |
| E2 | TKW  | 3B | AX.89729166 | 7.22E+08 | 0.38 | -0.95  | 3.16 | 0.06 |
| E2 | GY   | 3B | AX.89629664 | 5.32E+08 | 0.09 | -4.23  | 4.63 | 0.06 |
| E2 | GY   | 3B | AX.89434921 | 7.48E+08 | 0.11 | -3.25  | 3.38 | 0.04 |
| E2 | GY   | 3B | AX.89708404 | 7.49E+08 | 0.11 | -3.25  | 3.38 | 0.04 |
| E2 | GY   | 3B | AX.89469689 | 4.97E+08 | 0.42 | -1.93  | 3.05 | 0.05 |
| E2 | GY   | 3B | AX.89469689 | 4.97E+08 | 0.42 | -1.93  | 3.05 | 0.05 |
| E2 | GY   | 3B | AX.89564444 | 7.49E+08 | 0.11 | -3.25  | 3.38 | 0.04 |
| E2 | GY   | 3B | AX.89564444 | 7.49E+08 | 0.11 | -3.25  | 3.38 | 0.04 |
| E2 | GY   | 3B | AX.89459177 | 5.02E+08 | 0.48 | -1.90  | 3.06 | 0.06 |
| E2 | GY   | 3B | AX.89366640 | 2.51E+07 | 0.23 | -2.45  | 3.61 | 0.06 |
| E2 | GPM2 | 3B | AX.89643610 | 8.19E+08 | 0.25 | 565.18 | 3.09 | 0.04 |
| E2 | GY   | 3B | AX.89438012 | 7.83E+08 | 0.15 | -2.98  | 3.69 | 0.05 |
| E2 | GY   | 3B | AX.89438012 | 7.83E+08 | 0.15 | -2.98  | 3.69 | 0.05 |
| E2 | GY   | 3B | AX.89577476 | 7.47E+08 | 0.11 | -3.25  | 3.38 | 0.04 |
| E2 | GY   | 3B | AX.89714336 | 7.47E+08 | 0.11 | -3.25  | 3.38 | 0.04 |
| E2 | GY   | 3B | AX.89776584 | 7.49E+08 | 0.11 | -3.25  | 3.38 | 0.04 |
| E2 | GY   | 3B | AX.89776584 | 7.49E+08 | 0.11 | -3.25  | 3.38 | 0.04 |
| E2 | GY   | 3B | AX.89639311 | 4.98E+08 | 0.43 | -2.01  | 3.31 | 0.05 |
| E2 | GY   | 3B | AX.89512828 | 7.83E+08 | 0.15 | -2.86  | 3.42 | 0.05 |
| E2 | TKW  | 3B | AX.89740357 | 7.24E+08 | 0.35 | -0.95  | 3.07 | 0.06 |
| E2 | GY   | 3B | AX.89753272 | 7.48E+08 | 0.11 | -3.25  | 3.38 | 0.04 |
| E2 | GY   | 3B | AX.89371943 | 4.99E+08 | 0.43 | -1.92  | 3.05 | 0.05 |
| E2 | TKW  | 3B | AX.89317067 | 7.23E+08 | 0.35 | -0.95  | 3.07 | 0.06 |
| E2 | GY   | 3B | AX.89482510 | 7.48E+08 | 0.11 | -3.25  | 3.38 | 0.04 |
| E2 | GY   | 3B | AX.89482510 | 7.48E+08 | 0.11 | -3.25  | 3.38 | 0.04 |
| E2 | GY   | 3B | AX.89443876 | 7.62E+08 | 0.07 | -4.04  | 3.56 | 0.04 |
| E2 | GPS  | 3B | AX.89660660 | 7.71E+08 | 0.23 | 1.83   | 3.94 | 0.06 |
| E2 | GY   | 3B | AX.89621430 | 2.49E+07 | 0.11 | -4.40  | 5.80 | 0.08 |
| E2 | GY   | 3B | AX.89621430 | 2.49E+07 | 0.11 | -4.40  | 5.80 | 0.08 |
| E2 | GY   | 3B | AX.89645874 | 7.50E+08 | 0.10 | -3.29  | 3.32 | 0.04 |
| E2 | GY   | 3B | AX.89629664 | 5.32E+08 | 0.09 | -4.23  | 4.63 | 0.06 |
| E2 | GY   | 3B | AX.89696399 | 7.50E+08 | 0.11 | -3.25  | 3.38 | 0.04 |
| E2 | GY   | 3B | AX.89696399 | 7.50E+08 | 0.11 | -3.25  | 3.38 | 0.04 |
| E2 | GY   | 3B | AX.89414707 | 7.50E+08 | 0.09 | -3.29  | 3.11 | 0.04 |
| E2 | GY   | 3B | AX.89414707 | 7.50E+08 | 0.09 | -3.29  | 3.11 | 0.04 |
| E2 | GY   | 3B | AX.89565303 | 7.48E+08 | 0.11 | -3.25  | 3.38 | 0.04 |
| E2 | GY   | 3B | AX.89483525 | 7.47E+08 | 0.11 | -3.25  | 3.38 | 0.04 |
| E2 | GY   | 3B | AX.89483525 | 7.47E+08 | 0.11 | -3.25  | 3.38 | 0.04 |
| E2 | TKW  | 3B | AX.89603356 | 7.83E+08 | 0.21 | -1.23  | 3.60 | 0.07 |
| E2 | GY   | 3B | AX.89639311 | 4.98E+08 | 0.43 | -2.01  | 3.31 | 0.05 |
| E2 | TKW  | 3B | AX.89645549 | 7.21E+08 | 0.38 | -0.93  | 3.04 | 0.06 |
| E2 | GY   | 3B | AX.89662516 | 7.50E+08 | 0.11 | -3.25  | 3.38 | 0.04 |
| E2 | GY   | 3B | AX.89662516 | 7.50E+08 | 0.11 | -3.25  | 3.38 | 0.04 |
| E2 | GY   | 3B | AX.89645874 | 7.50E+08 | 0.10 | -3.29  | 3.32 | 0.04 |
| E2 | GY   | 3B | AX.89434921 | 7.48E+08 | 0.11 | -3.25  | 3.38 | 0.04 |
| E2 | TKW  | 3B | AX.89481743 | 7.24E+08 | 0.35 | -0.95  | 3.07 | 0.06 |
| E2 | GY   | 3B | AX.89729251 | 7.50E+08 | 0.11 | -3.25  | 3.38 | 0.04 |

|    |      |    |             |          |      |          |      |      |
|----|------|----|-------------|----------|------|----------|------|------|
| E2 | GY   | 3B | AX.89601168 | 7.48E+08 | 0.11 | -3.25    | 3.38 | 0.04 |
| E2 | GY   | 3B | AX.89565303 | 7.48E+08 | 0.11 | -3.25    | 3.38 | 0.04 |
| E2 | GPS  | 3B | AX.89485134 | 2.46E+07 | 0.18 | -1.74    | 3.15 | 0.05 |
| E2 | TKW  | 3B | AX.89356626 | 7.24E+08 | 0.35 | -0.95    | 3.07 | 0.06 |
| E2 | GY   | 3B | AX.89443876 | 7.62E+08 | 0.07 | -4.04    | 3.56 | 0.04 |
| E2 | GY   | 3B | AX.89702791 | 7.48E+08 | 0.11 | -3.25    | 3.38 | 0.04 |
| E2 | TKW  | 3B | AX.89462566 | 7.21E+08 | 0.17 | -1.31    | 3.49 | 0.06 |
| E2 | TKW  | 3B | AX.89704746 | 7.21E+08 | 0.36 | -0.94    | 3.02 | 0.06 |
| E2 | GY   | 3B | AX.89585986 | 7.83E+08 | 0.15 | -2.86    | 3.42 | 0.05 |
| E2 | TKW  | 3B | AX.89575999 | 7.21E+08 | 0.38 | -0.93    | 3.04 | 0.06 |
| E2 | GPS  | 3B | AX.89628799 | 2.46E+07 | 0.18 | -1.74    | 3.15 | 0.05 |
| E2 | TKW  | 3B | AX.89520460 | 7.23E+08 | 0.34 | -0.99    | 3.23 | 0.06 |
| E2 | GY   | 3B | AX.89601168 | 7.48E+08 | 0.11 | -3.25    | 3.38 | 0.04 |
| E2 | TKW  | 3B | AX.89353779 | 7.24E+08 | 0.35 | -0.95    | 3.07 | 0.06 |
| E2 | GY   | 3B | AX.89643174 | 7.50E+08 | 0.11 | -3.25    | 3.38 | 0.04 |
| E2 | GY   | 3B | AX.89643174 | 7.50E+08 | 0.11 | -3.25    | 3.38 | 0.04 |
| E2 | TKW  | 3B | AX.89359805 | 7.24E+08 | 0.36 | -0.94    | 3.01 | 0.06 |
| E2 | TKW  | 3B | AX.89651138 | 7.24E+08 | 0.35 | -0.95    | 3.07 | 0.06 |
| E2 | TKW  | 3B | AX.89635474 | 7.24E+08 | 0.35 | -0.95    | 3.07 | 0.06 |
| E2 | TKW  | 3B | AX.89702899 | 7.21E+08 | 0.38 | -0.93    | 3.04 | 0.06 |
| E2 | GY   | 3B | AX.89585986 | 7.83E+08 | 0.15 | -2.86    | 3.42 | 0.05 |
| E2 | GY   | 3B | AX.89558408 | 7.50E+08 | 0.11 | -3.25    | 3.38 | 0.04 |
| E2 | GY   | 3B | AX.89753272 | 7.48E+08 | 0.11 | -3.25    | 3.38 | 0.04 |
| E2 | GY   | 3B | AX.89729251 | 7.50E+08 | 0.11 | -3.25    | 3.38 | 0.04 |
| E2 | TKW  | 3B | AX.89313612 | 6.24E+07 | 0.28 | 1.02     | 3.07 | 0.05 |
| E2 | GY   | 3B | AX.89558408 | 7.50E+08 | 0.11 | -3.25    | 3.38 | 0.04 |
| E2 | TKW  | 3B | AX.89726557 | 7.24E+08 | 0.35 | -0.95    | 3.07 | 0.06 |
| E2 | GPM2 | 3B | AX.89716122 | 7.01E+08 | 0.05 | -1337.53 | 4.01 | 0.08 |
| E2 | TKW  | 3B | AX.89683955 | 7.24E+08 | 0.35 | -0.95    | 3.07 | 0.06 |
| E2 | GPM2 | 3B | AX.89742555 | 4.74E+06 | 0.17 | -641.04  | 3.04 | 0.05 |
| E2 | GY   | 3B | AX.89702791 | 7.48E+08 | 0.11 | -3.25    | 3.38 | 0.04 |
| E2 | TKW  | 3B | AX.89548163 | 7.21E+08 | 0.38 | -0.93    | 3.04 | 0.06 |
| E2 | TKW  | 3B | AX.89433207 | 7.21E+08 | 0.38 | -0.93    | 3.04 | 0.06 |
| E2 | TKW  | 3B | AX.89723273 | 6.34E+07 | 0.27 | 1.03     | 3.08 | 0.05 |
| E2 | TKW  | 3B | AX.89686982 | 8.20E+08 | 0.08 | -1.68    | 3.07 | 0.05 |
| E2 | TKW  | 3B | AX.89754895 | 7.24E+08 | 0.35 | -0.95    | 3.07 | 0.06 |
| E2 | TKW  | 3B | AX.89602809 | 8.19E+08 | 0.08 | -1.68    | 3.07 | 0.05 |
| E2 | TKW  | 3B | AX.89330964 | 8.19E+08 | 0.08 | -1.68    | 3.07 | 0.05 |
| E2 | TKW  | 3B | AX.89694757 | 7.24E+08 | 0.35 | -0.95    | 3.07 | 0.06 |
| E2 | GPS  | 3B | AX.89351074 | 2.47E+07 | 0.18 | -1.74    | 3.15 | 0.05 |
| E3 | GPM2 | 3B | AX.89361709 | 2.49E+07 | 0.38 | 945.15   | 3.24 | 0.10 |
| E3 | GPM2 | 3B | AX.89450369 | 2.52E+07 | 0.42 | 855.49   | 3.30 | 0.09 |
| E3 | GPM2 | 3B | AX.89721932 | 2.52E+07 | 0.42 | 868.17   | 3.27 | 0.10 |
| E3 | GPM2 | 3B | AX.89500326 | 2.52E+07 | 0.25 | 1260.46  | 4.72 | 0.14 |
| E3 | GPM2 | 3B | AX.89398704 | 2.52E+07 | 0.36 | 944.86   | 3.72 | 0.12 |
| E3 | GPM2 | 3B | AX.89340298 | 2.52E+07 | 0.30 | 987.19   | 3.58 | 0.12 |
| E3 | GPM2 | 3B | AX.89332002 | 2.53E+07 | 0.30 | 987.19   | 3.58 | 0.12 |
| E3 | GPM2 | 3B | AX.89746790 | 2.53E+07 | 0.30 | 987.19   | 3.58 | 0.12 |
| E3 | GPM2 | 3B | AX.89745105 | 2.66E+07 | 0.36 | 918.83   | 3.35 | 0.10 |
| E3 | GPM2 | 3B | AX.89638378 | 2.89E+07 | 0.39 | 925.88   | 3.44 | 0.10 |

|    |      |    |             |          |      |         |      |      |
|----|------|----|-------------|----------|------|---------|------|------|
| E3 | GPM2 | 3B | AX.89564222 | 7.62E+08 | 0.45 | -896.75 | 3.42 | 0.11 |
| E3 | GPM2 | 3B | AX.89703941 | 7.62E+08 | 0.45 | -896.75 | 3.42 | 0.11 |
| E3 | GPM2 | 3B | AX.89328013 | 7.62E+08 | 0.49 | -844.85 | 3.23 | 0.07 |
| E3 | GPM2 | 3B | AX.89518796 | 7.62E+08 | 0.45 | -882.96 | 3.34 | 0.11 |
| E3 | GPM2 | 3B | AX.89468143 | 7.62E+08 | 0.45 | -874.71 | 3.26 | 0.10 |
| E3 | GPM2 | 3B | AX.89456880 | 7.62E+08 | 0.45 | -882.96 | 3.34 | 0.11 |
| E3 | GPM2 | 3B | AX.89470996 | 7.62E+08 | 0.45 | -882.96 | 3.34 | 0.11 |
| E3 | GPM2 | 3B | AX.89651315 | 7.62E+08 | 0.45 | -882.96 | 3.34 | 0.11 |
| E3 | GPM2 | 3B | AX.89398698 | 7.62E+08 | 0.45 | -874.71 | 3.26 | 0.10 |
| E3 | GPM2 | 3B | AX.89727081 | 7.62E+08 | 0.45 | -881.02 | 3.29 | 0.10 |
| E3 | GPM2 | 3B | AX.89378355 | 7.62E+08 | 0.45 | -874.71 | 3.26 | 0.10 |
| E3 | GPM2 | 3B | AX.89471736 | 7.62E+08 | 0.30 | -974.59 | 3.39 | 0.12 |
| E3 | GPS  | 3B | AX.89669180 | 1.93E+07 | 0.35 | 2.25    | 3.50 | 0.11 |
| E3 | GPS  | 3B | AX.89748259 | 7.61E+08 | 0.52 | 1.91    | 3.02 | 0.06 |
| E3 | GPS  | 3B | AX.89325043 | 7.61E+08 | 0.52 | 1.91    | 3.02 | 0.06 |
| E3 | GPS  | 3B | AX.89481321 | 7.61E+08 | 0.39 | 2.00    | 3.17 | 0.09 |
| E3 | GPS  | 3B | AX.89403171 | 7.61E+08 | 0.52 | 1.96    | 3.19 | 0.06 |
| E3 | GPS  | 3B | AX.89566715 | 7.61E+08 | 0.39 | 2.00    | 3.17 | 0.09 |
| E3 | GPS  | 3B | AX.89712629 | 7.61E+08 | 0.42 | 1.92    | 3.02 | 0.08 |
| E3 | GPS  | 3B | AX.89595359 | 7.61E+08 | 0.46 | -2.01   | 3.30 | 0.05 |
| E3 | GPS  | 3B | AX.89362933 | 7.61E+08 | 0.46 | -2.01   | 3.30 | 0.05 |
| E3 | GPS  | 3B | AX.89725883 | 7.61E+08 | 0.47 | -2.02   | 3.35 | 0.05 |
| E3 | GPS  | 3B | AX.89633568 | 7.61E+08 | 0.46 | -1.98   | 3.20 | 0.05 |
| E3 | GPS  | 3B | AX.89414048 | 7.61E+08 | 0.46 | -2.01   | 3.30 | 0.05 |
| E3 | GPS  | 3B | AX.89313664 | 7.61E+08 | 0.46 | -2.01   | 3.30 | 0.05 |
| E3 | GPS  | 3B | AX.89325522 | 7.61E+08 | 0.46 | -1.95   | 3.13 | 0.05 |
| E3 | GPS  | 3B | AX.89475072 | 7.61E+08 | 0.46 | -1.95   | 3.13 | 0.05 |
| E3 | GPS  | 3B | AX.89634496 | 7.61E+08 | 0.45 | -1.96   | 3.15 | 0.05 |
| E3 | GPS  | 3B | AX.89754938 | 7.61E+08 | 0.46 | -1.95   | 3.13 | 0.05 |
| E3 | GPS  | 3B | AX.89514120 | 7.61E+08 | 0.46 | -1.98   | 3.25 | 0.05 |
| E3 | GPS  | 3B | AX.89469013 | 7.61E+08 | 0.45 | -1.93   | 3.08 | 0.05 |
| E3 | GPS  | 3B | AX.89763353 | 7.61E+08 | 0.46 | -2.01   | 3.30 | 0.05 |
| E3 | GPS  | 3B | AX.89500846 | 7.61E+08 | 0.45 | -1.96   | 3.15 | 0.05 |
| E3 | GPS  | 3B | AX.89513252 | 7.63E+08 | 0.30 | -2.11   | 3.11 | 0.03 |
| E3 | GPS  | 3B | AX.89530132 | 7.63E+08 | 0.31 | -2.07   | 3.05 | 0.03 |
| E3 | GPS  | 3B | AX.89591847 | 8.17E+08 | 0.23 | 2.65    | 3.80 | 0.09 |
| E3 | GY   | 3B | AX.89732128 | 2.52E+07 | 0.31 | -3.60   | 3.88 | 0.04 |
| E3 | GY   | 3B | AX.89340298 | 2.52E+07 | 0.30 | 3.92    | 4.80 | 0.12 |
| E3 | GY   | 3B | AX.89332002 | 2.53E+07 | 0.30 | 3.92    | 4.80 | 0.12 |
| E3 | GY   | 3B | AX.89746790 | 2.53E+07 | 0.30 | 3.92    | 4.80 | 0.12 |
| E3 | GY   | 3B | AX.89476808 | 2.53E+07 | 0.30 | -3.43   | 3.58 | 0.04 |
| E3 | GY   | 3B | AX.89638852 | 2.54E+07 | 0.32 | -3.19   | 3.19 | 0.03 |
| E3 | GY   | 3B | AX.89589895 | 2.66E+07 | 0.27 | 3.36    | 3.16 | 0.10 |
| E3 | GY   | 3B | AX.89446080 | 2.66E+07 | 0.26 | 3.47    | 3.32 | 0.10 |
| E3 | GY   | 3B | AX.89571512 | 2.66E+07 | 0.26 | 4.06    | 4.24 | 0.12 |
| E3 | GY   | 3B | AX.89564222 | 7.62E+08 | 0.45 | -2.92   | 3.24 | 0.07 |
| E3 | GY   | 3B | AX.89703941 | 7.62E+08 | 0.45 | -2.92   | 3.24 | 0.07 |
| E3 | GY   | 3B | AX.89518796 | 7.62E+08 | 0.45 | -2.85   | 3.13 | 0.07 |
| E3 | GY   | 3B | AX.89468143 | 7.62E+08 | 0.45 | -2.80   | 3.01 | 0.06 |
| E3 | GY   | 3B | AX.89349219 | 7.62E+08 | 0.40 | 2.76    | 3.07 | 0.03 |

|    |      |    |               |          |      |          |      |      |
|----|------|----|---------------|----------|------|----------|------|------|
| E3 | GY   | 3B | AX.89456880   | 7.62E+08 | 0.45 | -2.85    | 3.13 | 0.07 |
| E3 | GY   | 3B | AX.89470996   | 7.62E+08 | 0.45 | -2.85    | 3.13 | 0.07 |
| E3 | GY   | 3B | AX.89651315   | 7.62E+08 | 0.45 | -2.85    | 3.13 | 0.07 |
| E3 | GY   | 3B | AX.89398698   | 7.62E+08 | 0.45 | -2.80    | 3.01 | 0.06 |
| E3 | GY   | 3B | AX.89378355   | 7.62E+08 | 0.45 | -2.80    | 3.01 | 0.06 |
| E3 | GY   | 3B | X.89462720_OT | 1.87E+07 | 0.15 | 4.08     | 3.11 | 0.09 |
| E3 | GY   | 3B | AX.89361709   | 2.49E+07 | 0.38 | 3.12     | 3.16 | 0.08 |
| E3 | GY   | 3B | X.89357555_OT | 2.51E+07 | 0.32 | 3.17     | 3.17 | 0.10 |
| E3 | GY   | 3B | AX.89312638   | 2.52E+07 | 0.31 | -3.60    | 3.88 | 0.04 |
| E3 | GY   | 3B | AX.89450369   | 2.52E+07 | 0.42 | 3.47     | 4.57 | 0.08 |
| E3 | GY   | 3B | AX.89717165   | 2.52E+07 | 0.43 | 3.24     | 3.95 | 0.09 |
| E3 | GY   | 3B | AX.89721932   | 2.52E+07 | 0.42 | 3.38     | 4.23 | 0.09 |
| E3 | GY   | 3B | AX.89500326   | 2.52E+07 | 0.25 | 3.89     | 4.09 | 0.09 |
| E3 | GY   | 3B | AX.89378918   | 2.52E+07 | 0.31 | -3.10    | 3.02 | 0.03 |
| E3 | GY   | 3B | AX.89398704   | 2.52E+07 | 0.36 | 3.39     | 4.16 | 0.10 |
| E3 | GY   | 3B | AX.89599748   | 2.52E+07 | 0.30 | 3.55     | 4.05 | 0.10 |
| E3 | TKW  | 3B | X.89583616_OT | 2.20E+07 | 0.17 | -1.11    | 3.00 | 0.04 |
| E3 | TKW  | 3B | X.89603855_OT | 2.20E+07 | 0.16 | -1.18    | 3.29 | 0.05 |
| E3 | SPM2 | 3B | AX.89312296   | 7.85E+08 | 0.07 | 40.99    | 3.61 | 0.08 |
| E3 | SPM2 | 3B | AX.89495829   | 7.86E+08 | 0.08 | 39.79    | 3.90 | 0.07 |
| E4 | GPM2 | 3B | AX.89375902   | 1.60E+06 | 0.06 | -957.29  | 3.11 | 0.06 |
| E4 | GPM2 | 3B | AX.89414398   | 2.32E+06 | 0.25 | -524.12  | 3.27 | 0.03 |
| E4 | GPM2 | 3B | AX.89343438   | 2.05E+07 | 0.43 | 436.98   | 3.08 | 0.03 |
| E4 | GPM2 | 3B | AX.89551197   | 2.05E+07 | 0.42 | 494.56   | 3.80 | 0.03 |
| E4 | GPM2 | 3B | AX.89346438   | 2.07E+07 | 0.42 | -553.96  | 4.27 | 0.06 |
| E4 | GPM2 | 3B | AX.89511603   | 2.07E+07 | 0.48 | 444.96   | 3.10 | 0.04 |
| E4 | GPM2 | 3B | AX.89349060   | 3.98E+07 | 0.06 | -1017.23 | 3.21 | 0.05 |
| E4 | GPM2 | 3B | X.89514602_OT | 5.18E+07 | 0.09 | -809.79  | 3.67 | 0.05 |
| E4 | GPM2 | 3B | X.89330274_OT | 5.18E+07 | 0.10 | -822.20  | 3.97 | 0.05 |
| E4 | GPM2 | 3B | X.89583868_OT | 5.19E+07 | 0.10 | -811.51  | 3.90 | 0.05 |
| E4 | GPM2 | 3B | AX.89418290   | 5.19E+07 | 0.10 | -743.74  | 3.46 | 0.05 |
| E4 | GPM2 | 3B | X.89326997_OT | 5.19E+07 | 0.09 | -870.17  | 4.28 | 0.06 |
| E4 | GPM2 | 3B | X.89417732_OT | 5.19E+07 | 0.10 | -822.20  | 3.97 | 0.05 |
| E4 | GPM2 | 3B | X.89765198_OT | 5.20E+07 | 0.08 | -799.03  | 3.25 | 0.04 |
| E4 | GPM2 | 3B | AX.89316463   | 5.28E+07 | 0.09 | -852.02  | 4.17 | 0.06 |
| E4 | GPM2 | 3B | AX.89742018   | 6.28E+08 | 0.14 | -627.69  | 3.06 | 0.04 |
| E4 | GPM2 | 3B | AX.89767504   | 6.29E+08 | 0.14 | -627.69  | 3.06 | 0.04 |
| E4 | GPM2 | 3B | X.89364843_OT | 5.19E+07 | 0.10 | -725.51  | 3.26 | 0.04 |
| E4 | GPM2 | 3B | AX.89440384   | 6.29E+08 | 0.15 | -645.08  | 3.25 | 0.04 |
| E4 | GPM2 | 3B | AX.89747109   | 7.32E+08 | 0.42 | 468.89   | 3.38 | 0.03 |
| E4 | GPS  | 3B | AX.89619803   | 2.37E+07 | 0.17 | 2.46     | 4.43 | 0.10 |
| E4 | GPS  | 3B | AX.89545348   | 2.37E+07 | 0.12 | 2.90     | 4.59 | 0.10 |
| E4 | GPS  | 3B | AX.89742676   | 6.65E+08 | 0.22 | 1.85     | 3.05 | 0.07 |
| E4 | GY   | 3B | AX.89551197   | 2.05E+07 | 0.42 | 1.48     | 3.08 | 0.03 |
| E4 | GY   | 3B | AX.89346438   | 2.07E+07 | 0.41 | -2.00    | 4.93 | 0.07 |
| E4 | GY   | 3B | AX.89511603   | 2.07E+07 | 0.48 | 1.55     | 3.33 | 0.05 |
| E4 | GY   | 3B | AX.89349060   | 3.98E+07 | 0.06 | -3.30    | 3.20 | 0.05 |
| E4 | GY   | 3B | AX.89417490   | 4.51E+07 | 0.45 | 1.52     | 3.05 | 0.03 |
| E4 | SPM2 | 3B | AX.89328925   | 7.31E+08 | 0.44 | 16.94    | 3.28 | 0.03 |
| E4 | TKW  | 3B | AX.89500326   | 2.52E+07 | 0.25 | -1.02    | 3.39 | 0.10 |

|    |      |    |             |          |      |        |      |      |
|----|------|----|-------------|----------|------|--------|------|------|
| E4 | TKW  | 3B | AX.89591847 | 8.17E+08 | 0.23 | -1.05  | 3.58 | 0.04 |
| E1 | GY   | 3D | AX.89402594 | 1.76E+07 | 0.18 | 3.40   | 3.86 | 0.07 |
| E1 | SPM2 | 3D | AX.89369772 | 1.85E+07 | 0.19 | 23.16  | 3.69 | 0.07 |
| E1 | GY   | 3D | AX.89489985 | 5.90E+08 | 0.47 | 2.37   | 3.25 | 0.06 |
| E1 | SPM2 | 3D | AX.89355409 | 1.88E+07 | 0.19 | 23.95  | 3.85 | 0.07 |
| E1 | GY   | 3D | AX.89453199 | 5.95E+08 | 0.07 | -5.19  | 3.92 | 0.06 |
| E1 | SPM2 | 3D | AX.89381301 | 1.88E+07 | 0.23 | 19.32  | 3.06 | 0.05 |
| E1 | GY   | 3D | AX.89760480 | 1.65E+08 | 0.36 | 2.39   | 3.06 | 0.06 |
| E1 | SPM2 | 3D | AX.89668035 | 5.97E+08 | 0.31 | -21.77 | 4.43 | 0.08 |
| E1 | GY   | 3D | AX.89489985 | 5.90E+08 | 0.47 | 2.37   | 3.25 | 0.06 |
| E1 | SPM2 | 3D | AX.89402594 | 1.76E+07 | 0.18 | 22.87  | 3.50 | 0.06 |
| E1 | GY   | 3D | AX.89760480 | 1.65E+08 | 0.36 | 2.39   | 3.06 | 0.06 |
| E1 | GY   | 3D | AX.89453199 | 5.95E+08 | 0.07 | -5.19  | 3.92 | 0.06 |
| E1 | SPM2 | 3D | AX.89443707 | 1.85E+07 | 0.19 | 23.95  | 3.85 | 0.07 |
| E1 | GY   | 3D | AX.89355409 | 1.88E+07 | 0.19 | 3.47   | 4.07 | 0.07 |
| E1 | GY   | 3D | AX.89355409 | 1.88E+07 | 0.19 | 3.47   | 4.07 | 0.07 |
| E1 | SPM2 | 3D | AX.89610452 | 1.86E+07 | 0.19 | 23.95  | 3.85 | 0.07 |
| E1 | GY   | 3D | AX.89433577 | 1.84E+07 | 0.18 | 3.40   | 3.86 | 0.07 |
| E1 | GY   | 3D | AX.89354458 | 5.99E+08 | 0.20 | -2.92  | 3.21 | 0.05 |
| E1 | GY   | 3D | AX.89610452 | 1.86E+07 | 0.19 | 3.47   | 4.07 | 0.07 |
| E1 | SPM2 | 3D | AX.89433577 | 1.84E+07 | 0.18 | 22.87  | 3.50 | 0.06 |
| E1 | SPM2 | 3D | AX.89602134 | 1.86E+07 | 0.19 | 23.95  | 3.85 | 0.07 |
| E1 | GY   | 3D | AX.89404185 | 1.88E+07 | 0.19 | 3.48   | 4.15 | 0.08 |
| E1 | SPM2 | 3D | AX.89345657 | 1.85E+07 | 0.19 | 23.95  | 3.85 | 0.07 |
| E1 | SPM2 | 3D | AX.89441611 | 1.79E+07 | 0.18 | 22.87  | 3.50 | 0.06 |
| E1 | GY   | 3D | AX.89602134 | 1.86E+07 | 0.19 | 3.47   | 4.07 | 0.07 |
| E1 | GY   | 3D | AX.89621615 | 1.93E+07 | 0.13 | 3.42   | 3.00 | 0.05 |
| E1 | GY   | 3D | AX.89610452 | 1.86E+07 | 0.19 | 3.47   | 4.07 | 0.07 |
| E1 | SPM2 | 3D | AX.89529257 | 4.06E+08 | 0.40 | 17.59  | 3.36 | 0.06 |
| E1 | GY   | 3D | AX.89461788 | 4.17E+06 | 0.49 | -2.30  | 3.09 | 0.05 |
| E1 | SPM2 | 3D | AX.89717369 | 1.72E+07 | 0.18 | 21.14  | 3.06 | 0.05 |
| E1 | GY   | 3D | AX.89345657 | 1.85E+07 | 0.19 | 3.47   | 4.07 | 0.07 |
| E1 | SPM2 | 3D | AX.89505227 | 1.75E+07 | 0.18 | 22.87  | 3.50 | 0.06 |
| E1 | GY   | 3D | AX.89312909 | 6.45E+07 | 0.30 | -2.80  | 3.71 | 0.06 |
| E1 | GY   | 3D | AX.89354458 | 5.99E+08 | 0.20 | -2.92  | 3.21 | 0.05 |
| E1 | GY   | 3D | AX.89402594 | 1.76E+07 | 0.18 | 3.40   | 3.86 | 0.07 |
| E1 | GY   | 3D | AX.89369772 | 1.85E+07 | 0.19 | 3.31   | 3.82 | 0.07 |
| E1 | SPM2 | 3D | AX.89404185 | 1.88E+07 | 0.19 | 23.98  | 3.92 | 0.07 |
| E1 | GY   | 3D | AX.89312909 | 6.45E+07 | 0.30 | -2.80  | 3.71 | 0.06 |
| E1 | SPM2 | 3D | AX.89689278 | 1.76E+07 | 0.19 | 21.31  | 3.14 | 0.05 |
| E1 | GY   | 3D | AX.89767270 | 1.17E+07 | 0.43 | 2.29   | 3.02 | 0.05 |
| E1 | GY   | 3D | AX.89621615 | 1.93E+07 | 0.13 | 3.42   | 3.00 | 0.05 |
| E1 | GY   | 3D | AX.89689278 | 1.76E+07 | 0.19 | 3.42   | 3.97 | 0.07 |
| E1 | GY   | 3D | AX.89404185 | 1.88E+07 | 0.19 | 3.48   | 4.15 | 0.08 |
| E1 | GY   | 3D | AX.89441611 | 1.79E+07 | 0.18 | 3.40   | 3.86 | 0.07 |
| E1 | GY   | 3D | AX.89441611 | 1.79E+07 | 0.18 | 3.40   | 3.86 | 0.07 |
| E1 | GY   | 3D | AX.89443707 | 1.85E+07 | 0.19 | 3.47   | 4.07 | 0.07 |
| E1 | GY   | 3D | AX.89695674 | 4.80E+08 | 0.33 | -2.41  | 3.03 | 0.05 |
| E1 | GY   | 3D | AX.89602134 | 1.86E+07 | 0.19 | 3.47   | 4.07 | 0.07 |
| E1 | GY   | 3D | AX.89505227 | 1.75E+07 | 0.18 | 3.40   | 3.86 | 0.07 |

|    |      |    |             |          |      |         |      |      |
|----|------|----|-------------|----------|------|---------|------|------|
| E1 | GY   | 3D | AX.89505227 | 1.75E+07 | 0.18 | 3.40    | 3.86 | 0.07 |
| E1 | GY   | 3D | AX.89712987 | 1.11E+07 | 0.40 | 2.32    | 3.03 | 0.04 |
| E1 | GY   | 3D | AX.89433577 | 1.84E+07 | 0.18 | 3.40    | 3.86 | 0.07 |
| E1 | GY   | 3D | AX.89689278 | 1.76E+07 | 0.19 | 3.42    | 3.97 | 0.07 |
| E1 | GPM2 | 3D | AX.89370178 | 2.06E+07 | 0.13 | 879.03  | 3.13 | 0.05 |
| E1 | GY   | 3D | AX.89461788 | 4.17E+06 | 0.49 | -2.30   | 3.09 | 0.05 |
| E1 | GPM2 | 3D | AX.89656257 | 2.03E+07 | 0.13 | 879.03  | 3.13 | 0.05 |
| E1 | GY   | 3D | AX.89369772 | 1.85E+07 | 0.19 | 3.31    | 3.82 | 0.07 |
| E1 | GY   | 3D | AX.89345657 | 1.85E+07 | 0.19 | 3.47    | 4.07 | 0.07 |
| E1 | GPM2 | 3D | AX.89529257 | 4.06E+08 | 0.40 | 618.51  | 3.25 | 0.05 |
| E1 | GPM2 | 3D | AX.89461788 | 4.17E+06 | 0.49 | -607.17 | 3.27 | 0.05 |
| E1 | GPM2 | 3D | AX.89467529 | 2.27E+07 | 0.13 | 879.03  | 3.13 | 0.05 |
| E1 | GY   | 3D | AX.89767270 | 1.17E+07 | 0.43 | 2.29    | 3.02 | 0.05 |
| E1 | GPM2 | 3D | AX.89417870 | 2.03E+07 | 0.13 | 879.03  | 3.13 | 0.05 |
| E1 | GPM2 | 3D | AX.89548359 | 2.29E+07 | 0.13 | 879.03  | 3.13 | 0.05 |
| E1 | GPM2 | 3D | AX.89760480 | 1.65E+08 | 0.36 | 631.23  | 3.25 | 0.06 |
| E1 | GPM2 | 3D | AX.89754856 | 5.67E+08 | 0.33 | 630.99  | 3.16 | 0.06 |
| E1 | GPM2 | 3D | AX.89344287 | 4.55E+07 | 0.47 | -604.96 | 3.23 | 0.06 |
| E1 | GPM2 | 3D | AX.89703410 | 2.22E+07 | 0.13 | 879.03  | 3.13 | 0.05 |
| E1 | GPM2 | 3D | AX.89610832 | 6.43E+07 | 0.27 | -705.77 | 3.42 | 0.06 |
| E1 | GPM2 | 3D | AX.89312909 | 6.45E+07 | 0.30 | -850.88 | 5.04 | 0.09 |
| E1 | GY   | 3D | AX.89712987 | 1.11E+07 | 0.40 | 2.32    | 3.03 | 0.04 |
| E1 | GY   | 3D | AX.89443707 | 1.85E+07 | 0.19 | 3.47    | 4.07 | 0.07 |
| E1 | GPM2 | 3D | AX.89520717 | 2.27E+07 | 0.13 | 879.03  | 3.13 | 0.05 |
| E1 | GPM2 | 3D | AX.89336389 | 6.75E+07 | 0.16 | -941.61 | 4.13 | 0.07 |
| E1 | GPM2 | 3D | AX.89572280 | 2.27E+07 | 0.13 | 879.03  | 3.13 | 0.05 |
| E1 | GY   | 3D | AX.89695674 | 4.80E+08 | 0.33 | -2.41   | 3.03 | 0.05 |
| E1 | TKW  | 3D | AX.89600888 | 4.49E+06 | 0.25 | 0.96    | 3.01 | 0.05 |
| E1 | TKW  | 3D | AX.89315294 | 6.06E+06 | 0.22 | 1.20    | 4.15 | 0.07 |
| E1 | TKW  | 3D | AX.89515175 | 5.92E+08 | 0.47 | -0.93   | 3.66 | 0.07 |
| E1 | TKW  | 3D | AX.89600728 | 4.47E+06 | 0.25 | 1.01    | 3.26 | 0.06 |
| E1 | TKW  | 3D | AX.89422652 | 5.57E+05 | 0.32 | 1.12    | 4.51 | 0.08 |
| E1 | TKW  | 3D | AX.89447134 | 4.50E+06 | 0.23 | 1.04    | 3.27 | 0.06 |
| E1 | TKW  | 3D | AX.89457308 | 4.18E+06 | 0.27 | 0.94    | 3.04 | 0.05 |
| E1 | TKW  | 3D | AX.89607970 | 3.98E+07 | 0.17 | 1.20    | 3.49 | 0.06 |
| E1 | TKW  | 3D | AX.89771060 | 4.08E+06 | 0.41 | 0.86    | 3.14 | 0.05 |
| E1 | TKW  | 3D | AX.89605534 | 3.94E+07 | 0.24 | 1.05    | 3.45 | 0.06 |
| E1 | TKW  | 3D | AX.89338618 | 4.06E+06 | 0.41 | 0.95    | 3.72 | 0.07 |
| E1 | GPM2 | 3D | AX.89775875 | 6.66E+07 | 0.15 | -948.98 | 3.93 | 0.07 |
| E1 | TKW  | 3D | AX.89518432 | 3.95E+05 | 0.34 | 0.90    | 3.18 | 0.06 |
| E1 | TKW  | 3D | AX.89520380 | 4.04E+06 | 0.40 | 0.85    | 3.04 | 0.05 |
| E1 | GPM2 | 3D | AX.89394916 | 2.06E+07 | 0.13 | 879.03  | 3.13 | 0.05 |
| E1 | TKW  | 3D | AX.89414234 | 4.47E+06 | 0.33 | 1.16    | 4.78 | 0.09 |
| E1 | TKW  | 3D | AX.89431512 | 4.08E+06 | 0.49 | 0.84    | 3.08 | 0.05 |
| E1 | TKW  | 3D | AX.89460086 | 5.92E+08 | 0.48 | -0.91   | 3.54 | 0.06 |
| E1 | TKW  | 3D | AX.89481773 | 4.06E+06 | 0.27 | 0.96    | 3.18 | 0.05 |
| E1 | GPM2 | 3D | AX.89519943 | 2.06E+07 | 0.13 | 879.03  | 3.13 | 0.05 |
| E1 | TKW  | 3D | AX.89624233 | 4.08E+06 | 0.28 | 0.92    | 3.03 | 0.05 |
| E1 | TKW  | 3D | AX.89749986 | 4.06E+06 | 0.20 | 1.14    | 3.59 | 0.06 |
| E1 | TKW  | 3D | AX.89366027 | 4.06E+06 | 0.21 | 1.10    | 3.47 | 0.06 |

|    |      |    |             |          |      |       |      |      |
|----|------|----|-------------|----------|------|-------|------|------|
| E1 | TKW  | 3D | AX.89353117 | 4.11E+06 | 0.47 | 0.89  | 3.36 | 0.06 |
| E1 | TKW  | 3D | AX.89363224 | 4.10E+07 | 0.21 | 1.08  | 3.31 | 0.06 |
| E1 | TKW  | 3D | AX.89318435 | 4.18E+06 | 0.18 | 1.10  | 3.09 | 0.05 |
| E1 | TKW  | 3D | AX.89622600 | 5.93E+05 | 0.39 | 1.00  | 3.96 | 0.07 |
| E1 | TKW  | 3D | AX.89312605 | 5.59E+05 | 0.27 | 0.98  | 3.23 | 0.06 |
| E1 | TKW  | 3D | AX.89598076 | 5.26E+05 | 0.27 | 1.00  | 3.33 | 0.06 |
| E1 | TKW  | 3D | AX.89398494 | 4.20E+06 | 0.27 | 0.97  | 3.19 | 0.05 |
| E1 | TKW  | 3D | AX.89570474 | 2.35E+06 | 0.16 | 1.16  | 3.18 | 0.05 |
| E1 | TKW  | 3D | AX.89770522 | 4.29E+06 | 0.27 | 0.95  | 3.11 | 0.05 |
| E1 | TKW  | 3D | AX.89669031 | 4.18E+06 | 0.27 | 0.95  | 3.10 | 0.05 |
| E1 | TKW  | 3D | AX.89366271 | 3.68E+05 | 0.18 | 1.20  | 3.64 | 0.06 |
| E2 | SPM2 | 3D | AX.89389704 | 1.74E+07 | 0.19 | 19.74 | 4.93 | 0.09 |
| E2 | SPM2 | 3D | AX.89410415 | 1.72E+07 | 0.19 | 19.74 | 4.93 | 0.09 |
| E2 | SPM2 | 3D | AX.89476748 | 1.76E+07 | 0.22 | 19.39 | 5.39 | 0.10 |
| E2 | SPM2 | 3D | AX.89453646 | 1.71E+07 | 0.19 | 19.74 | 4.93 | 0.09 |
| E2 | SPM2 | 3D | AX.89531997 | 1.74E+07 | 0.23 | 18.32 | 4.94 | 0.09 |
| E2 | SPM2 | 3D | AX.89711565 | 1.71E+07 | 0.09 | 19.96 | 3.03 | 0.05 |
| E2 | SPM2 | 3D | AX.89717369 | 1.72E+07 | 0.18 | 20.00 | 4.96 | 0.09 |
| E2 | SPM2 | 3D | AX.89708280 | 1.71E+07 | 0.23 | 18.32 | 4.94 | 0.09 |
| E2 | SPM2 | 3D | AX.89567994 | 6.04E+08 | 0.07 | 23.01 | 3.24 | 0.05 |
| E2 | SPM2 | 3D | AX.89493070 | 1.72E+07 | 0.23 | 18.32 | 4.94 | 0.09 |
| E2 | SPM2 | 3D | AX.89433577 | 1.84E+07 | 0.18 | 21.06 | 5.44 | 0.10 |
| E2 | SPM2 | 3D | AX.89322424 | 1.71E+07 | 0.19 | 19.74 | 4.93 | 0.09 |
| E2 | SPM2 | 3D | AX.89615509 | 1.77E+07 | 0.22 | 19.39 | 5.39 | 0.10 |
| E2 | SPM2 | 3D | AX.89443707 | 1.85E+07 | 0.19 | 20.31 | 5.19 | 0.09 |
| E2 | SPM2 | 3D | AX.89507597 | 1.71E+07 | 0.23 | 18.32 | 4.94 | 0.09 |
| E2 | SPM2 | 3D | AX.89309755 | 1.72E+07 | 0.23 | 18.32 | 4.94 | 0.09 |
| E2 | SPM2 | 3D | AX.89610452 | 1.86E+07 | 0.19 | 20.31 | 5.19 | 0.09 |
| E2 | SPM2 | 3D | AX.89694304 | 1.72E+07 | 0.23 | 18.32 | 4.94 | 0.09 |
| E2 | SPM2 | 3D | AX.89335774 | 1.87E+07 | 0.22 | 19.67 | 5.46 | 0.10 |
| E2 | SPM2 | 3D | AX.89404185 | 1.88E+07 | 0.19 | 19.15 | 4.75 | 0.08 |
| E2 | SPM2 | 3D | AX.89602134 | 1.86E+07 | 0.19 | 20.31 | 5.19 | 0.09 |
| E2 | SPM2 | 3D | AX.89402594 | 1.76E+07 | 0.18 | 21.06 | 5.44 | 0.10 |
| E2 | SPM2 | 3D | AX.89687725 | 1.84E+07 | 0.23 | 18.82 | 5.18 | 0.09 |
| E2 | SPM2 | 3D | AX.89320829 | 1.74E+07 | 0.23 | 18.32 | 4.94 | 0.09 |
| E2 | SPM2 | 3D | AX.89505227 | 1.75E+07 | 0.18 | 21.06 | 5.44 | 0.10 |
| E2 | SPM2 | 3D | AX.89660803 | 1.72E+07 | 0.23 | 18.32 | 4.94 | 0.09 |
| E2 | SPM2 | 3D | AX.89517416 | 1.71E+07 | 0.23 | 18.32 | 4.94 | 0.09 |
| E2 | SPM2 | 3D | AX.89544588 | 1.74E+07 | 0.23 | 18.32 | 4.94 | 0.09 |
| E2 | SPM2 | 3D | AX.89405175 | 1.74E+07 | 0.23 | 18.32 | 4.94 | 0.09 |
| E2 | SPM2 | 3D | AX.89573416 | 1.71E+07 | 0.23 | 18.32 | 4.94 | 0.09 |
| E2 | SPM2 | 3D | AX.89763668 | 1.86E+07 | 0.23 | 18.82 | 5.18 | 0.09 |
| E2 | SPM2 | 3D | AX.89619764 | 1.71E+07 | 0.21 | 20.17 | 5.63 | 0.10 |
| E2 | SPM2 | 3D | AX.89544986 | 1.73E+07 | 0.19 | 19.74 | 4.93 | 0.09 |
| E2 | SPM2 | 3D | AX.89616014 | 1.72E+07 | 0.23 | 18.32 | 4.94 | 0.09 |
| E2 | SPM2 | 3D | AX.89733349 | 1.72E+07 | 0.23 | 18.32 | 4.94 | 0.09 |
| E2 | SPM2 | 3D | AX.89432654 | 1.72E+07 | 0.23 | 18.32 | 4.94 | 0.09 |
| E2 | SPM2 | 3D | AX.89533054 | 1.73E+07 | 0.23 | 18.32 | 4.94 | 0.09 |
| E2 | SPM2 | 3D | AX.89693910 | 1.73E+07 | 0.22 | 18.45 | 4.93 | 0.09 |
| E2 | SPM2 | 3D | AX.89345657 | 1.85E+07 | 0.19 | 20.31 | 5.19 | 0.09 |



|    |      |    |             |          |      |         |      |      |
|----|------|----|-------------|----------|------|---------|------|------|
| E2 | SPM2 | 3D | AX.89370256 | 1.84E+07 | 0.22 | 19.39   | 5.39 | 0.10 |
| E2 | SPM2 | 3D | AX.89661787 | 1.88E+07 | 0.23 | 18.82   | 5.18 | 0.09 |
| E2 | SPM2 | 3D | AX.89520276 | 1.71E+07 | 0.23 | 18.32   | 4.94 | 0.09 |
| E2 | SPM2 | 3D | AX.89403471 | 1.72E+07 | 0.19 | 19.74   | 4.93 | 0.09 |
| E2 | SPM2 | 3D | AX.89683342 | 1.71E+07 | 0.09 | 19.96   | 3.03 | 0.05 |
| E2 | SPM2 | 3D | AX.89323609 | 1.72E+07 | 0.20 | 19.30   | 4.90 | 0.09 |
| E2 | SPM2 | 3D | AX.89685514 | 1.88E+07 | 0.22 | 19.39   | 5.39 | 0.10 |
| E2 | SPM2 | 3D | AX.89435498 | 1.72E+07 | 0.23 | 18.32   | 4.94 | 0.09 |
| E2 | SPM2 | 3D | AX.89407278 | 1.74E+07 | 0.23 | 18.32   | 4.94 | 0.09 |
| E2 | SPM2 | 3D | AX.89490994 | 1.72E+07 | 0.19 | 19.74   | 4.93 | 0.09 |
| E2 | SPM2 | 3D | AX.89541216 | 6.03E+08 | 0.10 | 19.23   | 3.05 | 0.05 |
| E2 | SPM2 | 3D | AX.89665951 | 1.71E+07 | 0.23 | 18.32   | 4.94 | 0.09 |
| E2 | SPM2 | 3D | AX.89369772 | 1.85E+07 | 0.19 | 19.66   | 4.98 | 0.09 |
| E2 | SPM2 | 3D | AX.89538960 | 1.73E+07 | 0.19 | 19.74   | 4.93 | 0.09 |
| E2 | SPM2 | 3D | AX.89370258 | 1.74E+07 | 0.23 | 18.32   | 4.94 | 0.09 |
| E2 | SPM2 | 3D | AX.89591091 | 1.71E+07 | 0.23 | 18.32   | 4.94 | 0.09 |
| E2 | SPM2 | 3D | AX.89438456 | 1.74E+07 | 0.23 | 18.32   | 4.94 | 0.09 |
| E2 | SPM2 | 3D | AX.89503629 | 1.71E+07 | 0.09 | 21.45   | 3.29 | 0.06 |
| E2 | SPM2 | 3D | AX.89661843 | 1.72E+07 | 0.19 | 19.74   | 4.93 | 0.09 |
| E2 | SPM2 | 3D | AX.89414746 | 1.70E+07 | 0.10 | 21.51   | 3.57 | 0.06 |
| E2 | SPM2 | 3D | AX.89381301 | 1.88E+07 | 0.23 | 17.88   | 4.79 | 0.09 |
| E2 | SPM2 | 3D | AX.89317317 | 1.71E+07 | 0.23 | 18.32   | 4.94 | 0.09 |
| E2 | SPM2 | 3D | AX.89773365 | 1.71E+07 | 0.23 | 18.32   | 4.94 | 0.09 |
| E2 | SPM2 | 3D | AX.89603618 | 1.74E+07 | 0.23 | 18.32   | 4.94 | 0.09 |
| E2 | SPM2 | 3D | AX.89428216 | 1.71E+07 | 0.23 | 18.32   | 4.94 | 0.09 |
| E2 | SPM2 | 3D | AX.89595636 | 1.85E+07 | 0.23 | 18.82   | 5.18 | 0.09 |
| E2 | SPM2 | 3D | AX.89441611 | 1.79E+07 | 0.18 | 21.06   | 5.44 | 0.10 |
| E2 | SPM2 | 3D | AX.89768223 | 1.71E+07 | 0.19 | 19.74   | 4.93 | 0.09 |
| E2 | SPM2 | 3D | AX.89626829 | 1.73E+07 | 0.18 | 19.95   | 4.94 | 0.09 |
| E2 | SPM2 | 3D | AX.89756706 | 1.71E+07 | 0.09 | 19.96   | 3.03 | 0.05 |
| E2 | SPM2 | 3D | AX.89355409 | 1.88E+07 | 0.19 | 20.31   | 5.19 | 0.09 |
| E2 | SPM2 | 3D | AX.89689278 | 1.76E+07 | 0.19 | 20.11   | 5.10 | 0.09 |
| E2 | SPM2 | 3D | AX.89480281 | 1.76E+07 | 0.22 | 19.39   | 5.39 | 0.10 |
| E2 | SPM2 | 3D | AX.89745957 | 1.73E+07 | 0.19 | 19.74   | 4.93 | 0.09 |
| E2 | GPS  | 3D | AX.89661843 | 1.72E+07 | 0.18 | -1.74   | 3.13 | 0.05 |
| E2 | GPS  | 3D | AX.89389704 | 1.74E+07 | 0.18 | -1.74   | 3.13 | 0.05 |
| E2 | GPS  | 3D | AX.89490994 | 1.72E+07 | 0.18 | -1.74   | 3.13 | 0.05 |
| E2 | GPS  | 3D | AX.89512995 | 6.13E+08 | 0.46 | 1.41    | 3.39 | 0.06 |
| E2 | GPM2 | 3D | AX.89618585 | 4.07E+06 | 0.28 | -531.93 | 3.02 | 0.05 |
| E2 | GPS  | 3D | AX.89544986 | 1.73E+07 | 0.18 | -1.74   | 3.13 | 0.05 |
| E2 | GPS  | 3D | AX.89453646 | 1.71E+07 | 0.18 | -1.74   | 3.13 | 0.05 |
| E2 | GPS  | 3D | AX.89410415 | 1.72E+07 | 0.18 | -1.74   | 3.13 | 0.05 |
| E2 | GPS  | 3D | AX.89717369 | 1.72E+07 | 0.18 | -1.76   | 3.14 | 0.05 |
| E2 | GPS  | 3D | AX.89745957 | 1.73E+07 | 0.18 | -1.74   | 3.13 | 0.05 |
| E2 | GPS  | 3D | AX.89768223 | 1.71E+07 | 0.18 | -1.74   | 3.13 | 0.05 |
| E2 | GPS  | 3D | AX.89626829 | 1.73E+07 | 0.18 | -1.80   | 3.27 | 0.05 |
| E2 | TKW  | 3D | AX.89460086 | 5.92E+08 | 0.48 | -1.02   | 3.53 | 0.07 |
| E2 | GPS  | 3D | AX.89538960 | 1.73E+07 | 0.18 | -1.74   | 3.13 | 0.05 |
| E2 | TKW  | 3D | AX.89515175 | 5.92E+08 | 0.47 | -1.02   | 3.51 | 0.07 |
| E2 | GPS  | 3D | AX.89322424 | 1.71E+07 | 0.18 | -1.74   | 3.13 | 0.05 |

|    |      |    |               |          |      |         |      |      |
|----|------|----|---------------|----------|------|---------|------|------|
| E2 | GPS  | 3D | AX.89403471   | 1.72E+07 | 0.18 | -1.74   | 3.13 | 0.05 |
| E2 | GPM2 | 3D | AX.89624233   | 4.08E+06 | 0.28 | -551.62 | 3.22 | 0.05 |
| E3 | TKW  | 3D | AX.89442683   | 2.45E+06 | 0.45 | 1.13    | 3.64 | 0.01 |
| E3 | TKW  | 3D | AX.89362642   | 7.22E+06 | 0.16 | -1.29   | 3.16 | 0.04 |
| E3 | TKW  | 3D | AX.89617227   | 2.34E+07 | 0.06 | 1.96    | 4.13 | 0.09 |
| E3 | TKW  | 3D | AX.89716925   | 2.42E+07 | 0.06 | 1.86    | 3.43 | 0.07 |
| E3 | TKW  | 3D | AX.89747401   | 2.45E+07 | 0.06 | 1.99    | 3.99 | 0.07 |
| E3 | TKW  | 3D | AX.89478192   | 2.47E+07 | 0.06 | 1.99    | 3.99 | 0.07 |
| E3 | TKW  | 3D | AX.89343882   | 2.62E+07 | 0.07 | 1.90    | 4.09 | 0.08 |
| E3 | GY   | 3D | AX.89736351   | 1.83E+07 | 0.09 | -4.86   | 3.23 | 0.01 |
| E4 | GPM2 | 3D | AX.89617227   | 2.34E+07 | 0.06 | -892.56 | 3.17 | 0.06 |
| E4 | GPM2 | 3D | AX.89716925   | 2.42E+07 | 0.06 | -953.35 | 3.24 | 0.06 |
| E4 | GPM2 | 3D | AX.89747401   | 2.45E+07 | 0.06 | -898.99 | 3.05 | 0.05 |
| E4 | GPM2 | 3D | AX.89478192   | 2.47E+07 | 0.06 | -898.99 | 3.05 | 0.05 |
| E4 | GPM2 | 3D | AX.89343882   | 2.62E+07 | 0.07 | -946.14 | 3.66 | 0.06 |
| E4 | GPM2 | 3D | AX.89543114   | 3.99E+07 | 0.10 | -728.55 | 3.28 | 0.07 |
| E4 | GPM2 | 3D | AX.89640561   | 6.03E+08 | 0.20 | -554.16 | 3.08 | 0.07 |
| E4 | GPM2 | 3D | AX.89501088   | 6.04E+08 | 0.20 | -566.13 | 3.17 | 0.07 |
| E4 | GPM2 | 3D | AX.89645710   | 6.04E+08 | 0.20 | -540.16 | 3.02 | 0.06 |
| E4 | GPM2 | 3D | AX.89329033   | 6.04E+08 | 0.20 | -543.57 | 3.05 | 0.07 |
| E4 | GPM2 | 3D | AX.89363126   | 6.04E+08 | 0.20 | -541.51 | 3.01 | 0.06 |
| E4 | SPM2 | 3D | AX.89487272   | 6.20E+06 | 0.24 | -19.52  | 3.15 | 0.05 |
| E4 | SPM2 | 3D | AX.89408613   | 2.18E+07 | 0.20 | 21.17   | 3.41 | 0.07 |
| E4 | SPM2 | 3D | X.89561280_OT | 5.62E+08 | 0.09 | 28.86   | 3.40 | 0.05 |
| E4 | TKW  | 3D | AX.89343882   | 2.62E+07 | 0.07 | 1.66    | 3.30 | 0.06 |
| E1 | GY   | 4A | AX.89537167   | 7.39E+08 | 0.13 | -3.32   | 3.06 | 0.05 |
| E1 | GY   | 4A | AX.86169711   | 7.41E+08 | 0.33 | -2.72   | 3.73 | 0.05 |
| E1 | GY   | 4A | AX.89406498   | 6.61E+08 | 0.10 | -3.77   | 3.10 | 0.05 |
| E1 | GY   | 4A | AX.89313054   | 7.23E+08 | 0.12 | -3.61   | 3.26 | 0.05 |
| E1 | GY   | 4A | AX.89744180   | 7.19E+08 | 0.22 | -2.75   | 3.11 | 0.05 |
| E1 | GY   | 4A | AX.89314231   | 7.39E+08 | 0.16 | -3.52   | 3.79 | 0.06 |
| E1 | GY   | 4A | AX.89562467   | 4.09E+07 | 0.11 | -3.73   | 3.15 | 0.05 |
| E1 | GY   | 4A | AX.89689789   | 7.25E+08 | 0.21 | -2.77   | 3.07 | 0.04 |
| E1 | SPM2 | 4A | AX.89699897   | 6.17E+08 | 0.22 | 20.43   | 3.29 | 0.06 |
| E1 | GY   | 4A | AX.89483630   | 7.41E+08 | 0.36 | -3.26   | 5.34 | 0.08 |
| E1 | GY   | 4A | AX.86163267   | 7.06E+08 | 0.16 | -3.16   | 3.15 | 0.06 |
| E1 | GY   | 4A | AX.86163265   | 7.06E+08 | 0.16 | -3.16   | 3.15 | 0.06 |
| E1 | GY   | 4A | AX.89598281   | 7.31E+08 | 0.17 | -4.31   | 5.77 | 0.09 |
| E1 | GY   | 4A | AX.89586557   | 7.43E+08 | 0.20 | -3.26   | 3.96 | 0.06 |
| E1 | GY   | 4A | AX.89392070   | 7.10E+08 | 0.15 | -3.31   | 3.26 | 0.06 |
| E1 | GY   | 4A | AX.89522316   | 7.20E+08 | 0.22 | -2.85   | 3.31 | 0.06 |
| E1 | GY   | 4A | AX.89618425   | 7.24E+08 | 0.12 | -3.61   | 3.26 | 0.05 |
| E1 | GY   | 4A | AX.89385932   | 7.27E+08 | 0.13 | -3.56   | 3.28 | 0.05 |
| E1 | GY   | 4A | AX.89332213   | 7.41E+08 | 0.35 | -3.24   | 5.28 | 0.08 |
| E1 | GY   | 4A | AX.89346010   | 7.32E+08 | 0.26 | -3.45   | 5.05 | 0.08 |
| E1 | GY   | 4A | AX.89429350   | 6.61E+08 | 0.09 | -4.03   | 3.11 | 0.05 |
| E1 | GY   | 4A | AX.89351503   | 7.26E+08 | 0.18 | -3.14   | 3.36 | 0.05 |
| E1 | GY   | 4A | AX.89640857   | 7.24E+08 | 0.12 | -3.61   | 3.26 | 0.05 |
| E1 | GY   | 4A | AX.89446861   | 7.33E+08 | 0.11 | -4.31   | 4.18 | 0.07 |
| E1 | GY   | 4A | AX.89623044   | 7.31E+08 | 0.20 | -4.25   | 6.23 | 0.10 |

|    |      |    |             |          |      |       |      |      |
|----|------|----|-------------|----------|------|-------|------|------|
| E1 | GY   | 4A | AX.89346242 | 7.26E+08 | 0.18 | -3.19 | 3.51 | 0.05 |
| E1 | GY   | 4A | AX.86160988 | 7.42E+08 | 0.14 | -3.81 | 4.07 | 0.06 |
| E1 | GY   | 4A | AX.89746072 | 4.09E+07 | 0.11 | -3.73 | 3.15 | 0.05 |
| E1 | GY   | 4A | AX.89313054 | 7.23E+08 | 0.12 | -3.61 | 3.26 | 0.05 |
| E1 | SPM2 | 4A | AX.89366542 | 6.17E+08 | 0.16 | 23.05 | 3.23 | 0.06 |
| E1 | GY   | 4A | AX.89537167 | 7.39E+08 | 0.13 | -3.32 | 3.06 | 0.05 |
| E1 | SPM2 | 4A | AX.89380497 | 6.15E+08 | 0.35 | 19.07 | 3.68 | 0.07 |
| E1 | GY   | 4A | AX.89339840 | 7.33E+08 | 0.22 | -3.03 | 3.67 | 0.06 |
| E1 | GY   | 4A | AX.89412766 | 7.37E+08 | 0.14 | -3.43 | 3.40 | 0.05 |
| E1 | GY   | 4A | AX.89520254 | 7.26E+08 | 0.21 | -3.01 | 3.55 | 0.05 |
| E1 | GY   | 4A | AX.89353399 | 7.26E+08 | 0.20 | -2.95 | 3.27 | 0.05 |
| E1 | GY   | 4A | AX.89469231 | 7.30E+08 | 0.20 | -2.88 | 3.19 | 0.05 |
| E1 | GY   | 4A | AX.89342370 | 7.28E+08 | 0.17 | -3.95 | 4.93 | 0.08 |
| E1 | GY   | 4A | AX.89423577 | 7.26E+08 | 0.13 | -3.37 | 3.15 | 0.05 |
| E1 | SPM2 | 4A | AX.89623244 | 6.15E+08 | 0.35 | 19.07 | 3.68 | 0.07 |
| E1 | GY   | 4A | AX.89670415 | 7.22E+08 | 0.17 | -3.14 | 3.25 | 0.06 |
| E1 | GY   | 4A | AX.89768703 | 7.40E+08 | 0.27 | -3.09 | 4.26 | 0.07 |
| E1 | GY   | 4A | AX.89447138 | 7.20E+08 | 0.17 | -3.14 | 3.25 | 0.06 |
| E1 | GY   | 4A | AX.89367479 | 7.34E+08 | 0.22 | -2.75 | 3.12 | 0.05 |
| E1 | GY   | 4A | AX.89334906 | 7.30E+08 | 0.23 | -3.46 | 4.76 | 0.07 |
| E1 | GY   | 4A | AX.89385882 | 7.29E+08 | 0.22 | -3.44 | 4.58 | 0.07 |
| E1 | GY   | 4A | AX.89310768 | 7.28E+08 | 0.21 | -3.53 | 4.68 | 0.07 |
| E1 | GY   | 4A | AX.89385932 | 7.27E+08 | 0.13 | -3.56 | 3.28 | 0.05 |
| E1 | GY   | 4A | AX.89446643 | 7.40E+08 | 0.36 | -3.26 | 5.34 | 0.08 |
| E1 | GY   | 4A | AX.89322993 | 7.39E+08 | 0.15 | -3.46 | 3.52 | 0.05 |
| E1 | GY   | 4A | AX.89412618 | 7.34E+08 | 0.14 | -3.62 | 3.72 | 0.06 |
| E1 | GY   | 4A | AX.89615154 | 7.40E+08 | 0.25 | -3.16 | 4.20 | 0.06 |
| E1 | GY   | 4A | AX.89322015 | 7.39E+08 | 0.11 | -4.03 | 3.60 | 0.06 |
| E1 | GY   | 4A | AX.89392053 | 7.22E+08 | 0.22 | -2.94 | 3.44 | 0.06 |
| E1 | GY   | 4A | AX.89392070 | 7.10E+08 | 0.15 | -3.31 | 3.26 | 0.06 |
| E1 | GY   | 4A | AX.89446059 | 7.40E+08 | 0.16 | -3.59 | 4.00 | 0.06 |
| E1 | GY   | 4A | AX.89700054 | 7.25E+08 | 0.21 | -2.77 | 3.07 | 0.04 |
| E1 | GY   | 4A | AX.89671253 | 7.22E+08 | 0.16 | -3.31 | 3.48 | 0.06 |
| E1 | GY   | 4A | AX.89432469 | 7.31E+08 | 0.20 | -3.97 | 5.60 | 0.09 |
| E1 | GY   | 4A | AX.89483630 | 7.41E+08 | 0.36 | -3.26 | 5.34 | 0.08 |
| E1 | GY   | 4A | AX.89640857 | 7.24E+08 | 0.12 | -3.61 | 3.26 | 0.05 |
| E1 | GY   | 4A | AX.89353399 | 7.26E+08 | 0.20 | -2.95 | 3.27 | 0.05 |
| E1 | GY   | 4A | AX.89310801 | 7.27E+08 | 0.13 | -3.56 | 3.28 | 0.05 |
| E1 | GY   | 4A | AX.89560573 | 7.26E+08 | 0.21 | -3.47 | 4.48 | 0.07 |
| E1 | GY   | 4A | AX.89314783 | 7.24E+08 | 0.21 | -2.78 | 3.06 | 0.04 |
| E1 | GY   | 4A | AX.86160988 | 7.42E+08 | 0.14 | -3.81 | 4.07 | 0.06 |
| E1 | GY   | 4A | AX.89310426 | 7.41E+08 | 0.35 | -2.98 | 4.55 | 0.07 |
| E1 | GY   | 4A | AX.89746890 | 7.25E+08 | 0.07 | -5.25 | 4.29 | 0.07 |
| E1 | GY   | 4A | AX.89746890 | 7.25E+08 | 0.07 | -5.25 | 4.29 | 0.07 |
| E1 | GY   | 4A | AX.89334906 | 7.30E+08 | 0.23 | -3.46 | 4.76 | 0.07 |
| E1 | GY   | 4A | AX.89346242 | 7.26E+08 | 0.18 | -3.19 | 3.51 | 0.05 |
| E1 | GY   | 4A | AX.89609557 | 7.26E+08 | 0.21 | -3.35 | 4.20 | 0.06 |
| E1 | GY   | 4A | AX.89398534 | 7.26E+08 | 0.09 | -4.18 | 3.45 | 0.05 |
| E1 | GY   | 4A | AX.89414590 | 7.30E+08 | 0.17 | -3.31 | 3.56 | 0.05 |
| E1 | GY   | 4A | AX.89520266 | 7.26E+08 | 0.20 | -2.95 | 3.27 | 0.05 |

|    |      |    |             |          |      |        |      |      |
|----|------|----|-------------|----------|------|--------|------|------|
| E1 | GY   | 4A | AX.89356388 | 7.34E+08 | 0.20 | -3.32  | 4.01 | 0.06 |
| E1 | GY   | 4A | AX.89629181 | 7.39E+08 | 0.16 | -3.67  | 4.16 | 0.07 |
| E1 | SPM2 | 4A | AX.89606547 | 2.16E+07 | 0.35 | -17.67 | 3.25 | 0.06 |
| E1 | GY   | 4A | AX.89447138 | 7.20E+08 | 0.17 | -3.14  | 3.25 | 0.06 |
| E1 | GY   | 4A | AX.89310426 | 7.41E+08 | 0.35 | -2.98  | 4.55 | 0.07 |
| E1 | GY   | 4A | AX.89602929 | 7.27E+08 | 0.20 | -2.86  | 3.06 | 0.04 |
| E1 | GY   | 4A | AX.89637772 | 7.21E+08 | 0.17 | -3.14  | 3.25 | 0.06 |
| E1 | GY   | 4A | AX.89360038 | 7.33E+08 | 0.22 | -3.03  | 3.67 | 0.06 |
| E1 | GY   | 4A | AX.89586557 | 7.43E+08 | 0.20 | -3.26  | 3.96 | 0.06 |
| E1 | GY   | 4A | AX.89618425 | 7.24E+08 | 0.12 | -3.61  | 3.26 | 0.05 |
| E1 | GY   | 4A | AX.89476973 | 7.30E+08 | 0.20 | -3.02  | 3.42 | 0.05 |
| E1 | GY   | 4A | AX.89459794 | 7.40E+08 | 0.14 | -3.28  | 3.16 | 0.05 |
| E1 | GY   | 4A | AX.89482915 | 7.04E+08 | 0.16 | -3.16  | 3.15 | 0.06 |
| E1 | GY   | 4A | AX.89450482 | 4.11E+07 | 0.11 | -3.73  | 3.15 | 0.05 |
| E1 | GY   | 4A | AX.89338248 | 7.40E+08 | 0.31 | -3.26  | 5.00 | 0.08 |
| E1 | GY   | 4A | AX.89376551 | 7.22E+08 | 0.22 | -2.77  | 3.16 | 0.05 |
| E1 | GY   | 4A | AX.89314783 | 7.24E+08 | 0.21 | -2.78  | 3.06 | 0.04 |
| E1 | GY   | 4A | AX.89369162 | 7.26E+08 | 0.20 | -2.95  | 3.27 | 0.05 |
| E1 | GY   | 4A | AX.89392053 | 7.22E+08 | 0.22 | -2.94  | 3.44 | 0.06 |
| E1 | GY   | 4A | AX.89383862 | 7.22E+08 | 0.17 | -3.02  | 3.04 | 0.05 |
| E1 | GY   | 4A | AX.86163265 | 7.06E+08 | 0.16 | -3.16  | 3.15 | 0.06 |
| E1 | GY   | 4A | AX.89465835 | 7.41E+08 | 0.35 | -3.11  | 4.91 | 0.08 |
| E1 | GY   | 4A | AX.89327236 | 7.20E+08 | 0.18 | -2.96  | 3.09 | 0.05 |
| E1 | GY   | 4A | AX.89396876 | 7.13E+08 | 0.20 | -3.47  | 4.28 | 0.08 |
| E1 | GY   | 4A | AX.89327430 | 7.26E+08 | 0.28 | -3.45  | 5.27 | 0.08 |
| E1 | GY   | 4A | AX.89699271 | 7.22E+08 | 0.22 | -2.75  | 3.11 | 0.05 |
| E1 | GY   | 4A | AX.89377454 | 7.19E+08 | 0.13 | -3.52  | 3.39 | 0.06 |
| E1 | GY   | 4A | AX.89706134 | 7.42E+08 | 0.36 | -3.26  | 5.34 | 0.08 |
| E1 | GY   | 4A | AX.89332213 | 7.41E+08 | 0.35 | -3.24  | 5.28 | 0.08 |
| E1 | GY   | 4A | AX.89520254 | 7.26E+08 | 0.21 | -3.01  | 3.55 | 0.05 |
| E1 | GY   | 4A | AX.89397291 | 7.34E+08 | 0.13 | -3.69  | 3.67 | 0.06 |
| E1 | GY   | 4A | AX.89742680 | 7.31E+08 | 0.11 | -3.99  | 3.53 | 0.05 |
| E1 | GY   | 4A | AX.89579660 | 7.26E+08 | 0.11 | -3.69  | 3.19 | 0.05 |
| E1 | GY   | 4A | AX.89475393 | 7.28E+08 | 0.20 | -3.47  | 4.41 | 0.07 |
| E1 | GY   | 4A | AX.89475393 | 7.28E+08 | 0.20 | -3.47  | 4.41 | 0.07 |
| E1 | GY   | 4A | AX.89426288 | 6.61E+08 | 0.10 | -3.77  | 3.10 | 0.05 |
| E1 | GY   | 4A | AX.89342690 | 7.26E+08 | 0.20 | -2.95  | 3.27 | 0.05 |
| E1 | GY   | 4A | AX.89617069 | 7.28E+08 | 0.21 | -3.37  | 4.31 | 0.07 |
| E1 | GY   | 4A | AX.86163366 | 7.41E+08 | 0.32 | -2.97  | 4.32 | 0.07 |
| E1 | GY   | 4A | AX.89492172 | 6.17E+08 | 0.24 | -2.63  | 3.02 | 0.05 |
| E1 | GY   | 4A | AX.89703275 | 7.22E+08 | 0.17 | -3.09  | 3.15 | 0.06 |
| E1 | GY   | 4A | AX.89609557 | 7.26E+08 | 0.21 | -3.35  | 4.20 | 0.06 |
| E1 | GY   | 4A | AX.89503717 | 7.10E+08 | 0.16 | -3.16  | 3.15 | 0.06 |
| E1 | GY   | 4A | AX.89560573 | 7.26E+08 | 0.21 | -3.47  | 4.48 | 0.07 |
| E1 | GY   | 4A | AX.89327540 | 7.26E+08 | 0.20 | -2.95  | 3.27 | 0.05 |
| E1 | GY   | 4A | AX.89406498 | 6.61E+08 | 0.10 | -3.77  | 3.10 | 0.05 |
| E1 | GY   | 4A | AX.89409546 | 7.23E+08 | 0.06 | -5.17  | 3.53 | 0.06 |
| E1 | GY   | 4A | AX.89398873 | 7.21E+08 | 0.05 | -5.43  | 3.36 | 0.05 |
| E1 | GY   | 4A | AX.89456312 | 7.20E+08 | 0.16 | -3.14  | 3.18 | 0.06 |
| E1 | GY   | 4A | AX.89457592 | 7.26E+08 | 0.24 | -3.39  | 4.64 | 0.07 |

|    |      |    |             |          |      |       |      |      |
|----|------|----|-------------|----------|------|-------|------|------|
| E1 | GY   | 4A | AX.89682510 | 7.08E+08 | 0.15 | -3.31 | 3.26 | 0.06 |
| E1 | GY   | 4A | AX.89339840 | 7.33E+08 | 0.22 | -3.03 | 3.67 | 0.06 |
| E1 | GY   | 4A | AX.89667062 | 7.22E+08 | 0.22 | -2.89 | 3.35 | 0.06 |
| E1 | GY   | 4A | AX.89375502 | 7.40E+08 | 0.17 | -3.55 | 4.08 | 0.06 |
| E1 | GY   | 4A | AX.89351599 | 7.30E+08 | 0.20 | -3.47 | 4.41 | 0.07 |
| E1 | GY   | 4A | AX.89446059 | 7.40E+08 | 0.16 | -3.59 | 4.00 | 0.06 |
| E1 | GY   | 4A | AX.89539186 | 7.43E+08 | 0.19 | -3.14 | 3.54 | 0.05 |
| E1 | GY   | 4A | AX.89671253 | 7.22E+08 | 0.16 | -3.31 | 3.48 | 0.06 |
| E1 | GY   | 4A | AX.89336177 | 4.06E+07 | 0.11 | -3.73 | 3.15 | 0.05 |
| E1 | GY   | 4A | AX.89769007 | 7.41E+08 | 0.33 | -2.93 | 4.29 | 0.06 |
| E1 | GY   | 4A | AX.89411907 | 7.27E+08 | 0.16 | -3.43 | 3.63 | 0.06 |
| E1 | GY   | 4A | AX.89755912 | 7.33E+08 | 0.14 | -3.62 | 3.64 | 0.06 |
| E1 | GY   | 4A | AX.89468920 | 7.22E+08 | 0.17 | -3.14 | 3.25 | 0.06 |
| E1 | GY   | 4A | AX.89446608 | 7.25E+08 | 0.14 | -3.51 | 3.54 | 0.05 |
| E1 | GY   | 4A | AX.89381828 | 7.32E+08 | 0.27 | -3.43 | 5.05 | 0.08 |
| E1 | GY   | 4A | AX.89450476 | 7.26E+08 | 0.11 | -4.20 | 3.87 | 0.06 |
| E1 | GY   | 4A | AX.89672103 | 6.02E+08 | 0.21 | -2.94 | 3.36 | 0.05 |
| E1 | GY   | 4A | AX.89423359 | 7.24E+08 | 0.07 | -5.67 | 4.40 | 0.07 |
| E1 | GY   | 4A | AX.89387177 | 7.33E+08 | 0.20 | -2.98 | 3.39 | 0.05 |
| E1 | GY   | 4A | AX.89387177 | 7.33E+08 | 0.20 | -2.98 | 3.39 | 0.05 |
| E1 | GY   | 4A | AX.89446861 | 7.33E+08 | 0.11 | -4.31 | 4.18 | 0.07 |
| E1 | GY   | 4A | AX.89376728 | 7.27E+08 | 0.22 | -3.52 | 4.72 | 0.07 |
| E1 | GY   | 4A | AX.89314907 | 7.22E+08 | 0.22 | -2.94 | 3.44 | 0.06 |
| E1 | GY   | 4A | AX.89668236 | 7.33E+08 | 0.15 | -3.82 | 4.19 | 0.07 |
| E1 | GY   | 4A | AX.86166405 | 7.26E+08 | 0.20 | -2.95 | 3.27 | 0.05 |
| E1 | GY   | 4A | AX.89436017 | 7.25E+08 | 0.06 | -5.45 | 3.63 | 0.06 |
| E1 | GY   | 4A | AX.89552078 | 7.09E+08 | 0.15 | -3.35 | 3.34 | 0.06 |
| E1 | GY   | 4A | AX.89530069 | 7.40E+08 | 0.17 | -3.58 | 4.06 | 0.06 |
| E1 | GY   | 4A | AX.89377182 | 7.27E+08 | 0.21 | -3.53 | 4.68 | 0.07 |
| E1 | GY   | 4A | AX.89588174 | 7.34E+08 | 0.21 | -3.02 | 3.56 | 0.05 |
| E1 | GY   | 4A | AX.89746072 | 4.09E+07 | 0.11 | -3.73 | 3.15 | 0.05 |
| E1 | GY   | 4A | AX.89710159 | 7.24E+08 | 0.07 | -5.27 | 4.32 | 0.07 |
| E1 | GY   | 4A | AX.89334174 | 7.22E+08 | 0.22 | -2.75 | 3.11 | 0.05 |
| E1 | GY   | 4A | AX.89377454 | 7.19E+08 | 0.13 | -3.52 | 3.39 | 0.06 |
| E1 | GY   | 4A | AX.89338248 | 7.40E+08 | 0.31 | -3.26 | 5.00 | 0.08 |
| E1 | GY   | 4A | AX.89706134 | 7.42E+08 | 0.36 | -3.26 | 5.34 | 0.08 |
| E1 | GY   | 4A | AX.89397291 | 7.34E+08 | 0.13 | -3.69 | 3.67 | 0.06 |
| E1 | GY   | 4A | AX.89564765 | 7.39E+08 | 0.13 | -3.60 | 3.51 | 0.05 |
| E1 | GY   | 4A | AX.89491474 | 7.28E+08 | 0.15 | -3.40 | 3.42 | 0.05 |
| E1 | GY   | 4A | AX.89361955 | 7.39E+08 | 0.15 | -3.46 | 3.52 | 0.05 |
| E1 | GY   | 4A | AX.89377870 | 7.24E+08 | 0.07 | -5.67 | 4.40 | 0.07 |
| E1 | GY   | 4A | AX.86169711 | 7.41E+08 | 0.33 | -2.72 | 3.73 | 0.05 |
| E1 | GY   | 4A | AX.89342690 | 7.26E+08 | 0.20 | -2.95 | 3.27 | 0.05 |
| E1 | GY   | 4A | AX.89743266 | 4.09E+07 | 0.11 | -3.73 | 3.15 | 0.05 |
| E1 | GY   | 4A | AX.89557030 | 7.39E+08 | 0.16 | -3.67 | 4.16 | 0.07 |
| E1 | GY   | 4A | AX.89735433 | 7.24E+08 | 0.12 | -3.97 | 3.74 | 0.06 |
| E1 | GY   | 4A | AX.89661835 | 7.33E+08 | 0.11 | -3.63 | 3.02 | 0.04 |
| E1 | SPM2 | 4A | AX.89475843 | 6.17E+08 | 0.22 | 20.77 | 3.34 | 0.06 |
| E1 | GY   | 4A | AX.89425731 | 7.06E+08 | 0.16 | -3.16 | 3.15 | 0.06 |
| E1 | GY   | 4A | AX.89617589 | 4.11E+07 | 0.11 | -3.73 | 3.15 | 0.05 |

|    |    |    |             |          |      |       |      |      |
|----|----|----|-------------|----------|------|-------|------|------|
| E1 | GY | 4A | AX.89456312 | 7.20E+08 | 0.16 | -3.14 | 3.18 | 0.06 |
| E1 | GY | 4A | AX.89367424 | 7.22E+08 | 0.17 | -3.00 | 3.06 | 0.05 |
| E1 | GY | 4A | AX.89367479 | 7.34E+08 | 0.22 | -2.75 | 3.12 | 0.05 |
| E1 | GY | 4A | AX.89367604 | 7.25E+08 | 0.18 | -3.29 | 3.71 | 0.06 |
| E1 | GY | 4A | AX.89712404 | 7.20E+08 | 0.17 | -3.02 | 3.10 | 0.05 |
| E1 | GY | 4A | AX.89328992 | 7.33E+08 | 0.19 | -2.99 | 3.25 | 0.05 |
| E1 | GY | 4A | AX.89735433 | 7.24E+08 | 0.12 | -3.97 | 3.74 | 0.06 |
| E1 | GY | 4A | AX.89761056 | 7.30E+08 | 0.15 | -3.40 | 3.42 | 0.05 |
| E1 | GY | 4A | AX.89310768 | 7.28E+08 | 0.21 | -3.53 | 4.68 | 0.07 |
| E1 | GY | 4A | AX.89310801 | 7.27E+08 | 0.13 | -3.56 | 3.28 | 0.05 |
| E1 | GY | 4A | AX.89566818 | 7.24E+08 | 0.07 | -5.67 | 4.40 | 0.07 |
| E1 | GY | 4A | AX.89376272 | 7.26E+08 | 0.18 | -3.29 | 3.71 | 0.06 |
| E1 | GY | 4A | AX.89380026 | 7.24E+08 | 0.12 | -3.61 | 3.26 | 0.05 |
| E1 | GY | 4A | AX.89423359 | 7.24E+08 | 0.07 | -5.67 | 4.40 | 0.07 |
| E1 | GY | 4A | AX.89376551 | 7.22E+08 | 0.22 | -2.77 | 3.16 | 0.05 |
| E1 | GY | 4A | AX.89517951 | 7.26E+08 | 0.20 | -2.95 | 3.27 | 0.05 |
| E1 | GY | 4A | AX.89517951 | 7.26E+08 | 0.20 | -2.95 | 3.27 | 0.05 |
| E1 | GY | 4A | AX.89578493 | 7.20E+08 | 0.17 | -3.02 | 3.10 | 0.05 |
| E1 | GY | 4A | AX.89615154 | 7.40E+08 | 0.25 | -3.16 | 4.20 | 0.06 |
| E1 | GY | 4A | AX.89369037 | 7.34E+08 | 0.13 | -3.78 | 3.63 | 0.06 |
| E1 | GY | 4A | AX.89611401 | 7.20E+08 | 0.22 | -2.85 | 3.31 | 0.06 |
| E1 | GY | 4A | AX.89532662 | 7.40E+08 | 0.27 | -3.37 | 5.01 | 0.08 |
| E1 | GY | 4A | AX.89369165 | 7.22E+08 | 0.16 | -3.21 | 3.25 | 0.06 |
| E1 | GY | 4A | AX.89369165 | 7.22E+08 | 0.16 | -3.21 | 3.25 | 0.06 |
| E1 | GY | 4A | AX.86166405 | 7.26E+08 | 0.20 | -2.95 | 3.27 | 0.05 |
| E1 | GY | 4A | AX.89392325 | 7.24E+08 | 0.12 | -3.61 | 3.26 | 0.05 |
| E1 | GY | 4A | AX.89623044 | 7.31E+08 | 0.20 | -4.25 | 6.23 | 0.10 |
| E1 | GY | 4A | AX.89615361 | 7.24E+08 | 0.06 | -5.45 | 3.63 | 0.06 |
| E1 | GY | 4A | AX.89544271 | 4.09E+07 | 0.11 | -3.73 | 3.15 | 0.05 |
| E1 | GY | 4A | AX.89428619 | 7.22E+08 | 0.22 | -2.94 | 3.44 | 0.06 |
| E1 | GY | 4A | AX.89726273 | 7.40E+08 | 0.35 | -3.24 | 5.28 | 0.08 |
| E1 | GY | 4A | AX.89384587 | 7.31E+08 | 0.06 | -4.71 | 3.01 | 0.05 |
| E1 | GY | 4A | AX.89334174 | 7.22E+08 | 0.22 | -2.75 | 3.11 | 0.05 |
| E1 | GY | 4A | AX.89680753 | 7.26E+08 | 0.14 | -3.30 | 3.10 | 0.05 |
| E1 | GY | 4A | AX.89349822 | 7.39E+08 | 0.16 | -3.11 | 3.13 | 0.05 |
| E1 | GY | 4A | AX.89349822 | 7.39E+08 | 0.16 | -3.11 | 3.13 | 0.05 |
| E1 | GY | 4A | AX.89568535 | 7.31E+08 | 0.27 | -3.78 | 6.02 | 0.10 |
| E1 | GY | 4A | AX.89776093 | 7.31E+08 | 0.27 | -3.78 | 6.02 | 0.10 |
| E1 | GY | 4A | AX.89429350 | 6.61E+08 | 0.09 | -4.03 | 3.11 | 0.05 |
| E1 | GY | 4A | AX.89377870 | 7.24E+08 | 0.07 | -5.67 | 4.40 | 0.07 |
| E1 | GY | 4A | AX.89421360 | 7.22E+08 | 0.17 | -3.14 | 3.25 | 0.06 |
| E1 | GY | 4A | AX.89568764 | 7.43E+08 | 0.20 | -3.31 | 4.06 | 0.06 |
| E1 | GY | 4A | AX.89334772 | 4.09E+07 | 0.11 | -3.73 | 3.15 | 0.05 |
| E1 | GY | 4A | AX.89335287 | 7.34E+08 | 0.14 | -3.62 | 3.72 | 0.06 |
| E1 | GY | 4A | AX.89321025 | 7.34E+08 | 0.14 | -3.43 | 3.40 | 0.05 |
| E1 | GY | 4A | AX.89328332 | 7.39E+08 | 0.11 | -4.03 | 3.60 | 0.06 |
| E1 | GY | 4A | AX.89425731 | 7.06E+08 | 0.16 | -3.16 | 3.15 | 0.06 |
| E1 | GY | 4A | AX.89313341 | 7.39E+08 | 0.12 | -3.87 | 3.58 | 0.05 |
| E1 | GY | 4A | AX.89406883 | 7.26E+08 | 0.18 | -3.14 | 3.36 | 0.05 |
| E1 | GY | 4A | AX.89666696 | 7.43E+08 | 0.10 | -4.28 | 3.73 | 0.06 |

|    |    |    |             |          |      |       |      |      |
|----|----|----|-------------|----------|------|-------|------|------|
| E1 | GY | 4A | AX.89343635 | 7.31E+08 | 0.15 | -4.33 | 5.22 | 0.08 |
| E1 | GY | 4A | AX.89343635 | 7.31E+08 | 0.15 | -4.33 | 5.22 | 0.08 |
| E1 | GY | 4A | AX.89716456 | 7.29E+08 | 0.22 | -3.44 | 4.58 | 0.07 |
| E1 | GY | 4A | AX.89367424 | 7.22E+08 | 0.17 | -3.00 | 3.06 | 0.05 |
| E1 | GY | 4A | AX.89654995 | 7.27E+08 | 0.07 | -4.48 | 3.26 | 0.05 |
| E1 | GY | 4A | AX.89712404 | 7.20E+08 | 0.17 | -3.02 | 3.10 | 0.05 |
| E1 | GY | 4A | AX.89602929 | 7.27E+08 | 0.20 | -2.86 | 3.06 | 0.04 |
| E1 | GY | 4A | AX.89690364 | 7.40E+08 | 0.36 | -3.26 | 5.34 | 0.08 |
| E1 | GY | 4A | AX.89744514 | 7.20E+08 | 0.21 | -3.10 | 3.67 | 0.06 |
| E1 | GY | 4A | AX.89594775 | 7.18E+08 | 0.26 | -2.67 | 3.24 | 0.05 |
| E1 | GY | 4A | AX.89554610 | 7.20E+08 | 0.22 | -2.94 | 3.44 | 0.06 |
| E1 | GY | 4A | AX.89360065 | 7.27E+08 | 0.27 | -3.70 | 5.84 | 0.09 |
| E1 | GY | 4A | AX.89382815 | 7.25E+08 | 0.09 | -4.90 | 4.37 | 0.07 |
| E1 | GY | 4A | AX.89336562 | 7.05E+08 | 0.15 | -3.24 | 3.15 | 0.06 |
| E1 | GY | 4A | AX.89450482 | 4.11E+07 | 0.11 | -3.73 | 3.15 | 0.05 |
| E1 | GY | 4A | AX.89477455 | 7.22E+08 | 0.22 | -2.77 | 3.16 | 0.05 |
| E1 | GY | 4A | AX.89356388 | 7.34E+08 | 0.20 | -3.32 | 4.01 | 0.06 |
| E1 | GY | 4A | AX.89559394 | 7.33E+08 | 0.12 | -3.86 | 3.67 | 0.06 |
| E1 | GY | 4A | AX.89395851 | 7.36E+08 | 0.14 | -3.43 | 3.40 | 0.05 |
| E1 | GY | 4A | AX.89376728 | 7.27E+08 | 0.22 | -3.52 | 4.72 | 0.07 |
| E1 | GY | 4A | AX.89383862 | 7.22E+08 | 0.17 | -3.02 | 3.04 | 0.05 |
| E1 | GY | 4A | AX.89501646 | 7.25E+08 | 0.21 | -2.78 | 3.06 | 0.04 |
| E1 | GY | 4A | AX.89432469 | 7.31E+08 | 0.20 | -3.97 | 5.60 | 0.09 |
| E1 | GY | 4A | AX.89404612 | 7.30E+08 | 0.19 | -3.56 | 4.39 | 0.07 |
| E1 | GY | 4A | AX.89718118 | 7.22E+08 | 0.07 | -5.43 | 4.09 | 0.07 |
| E1 | GY | 4A | AX.89336177 | 4.06E+07 | 0.11 | -3.73 | 3.15 | 0.05 |
| E1 | GY | 4A | AX.89465835 | 7.41E+08 | 0.35 | -3.11 | 4.91 | 0.08 |
| E1 | GY | 4A | AX.89726273 | 7.40E+08 | 0.35 | -3.24 | 5.28 | 0.08 |
| E1 | GY | 4A | AX.89396876 | 7.13E+08 | 0.20 | -3.47 | 4.28 | 0.08 |
| E1 | GY | 4A | AX.89611873 | 7.19E+08 | 0.22 | -2.81 | 3.23 | 0.06 |
| E1 | GY | 4A | AX.89327540 | 7.26E+08 | 0.20 | -2.95 | 3.27 | 0.05 |
| E1 | GY | 4A | AX.89644184 | 7.33E+08 | 0.21 | -2.99 | 3.46 | 0.05 |
| E1 | GY | 4A | AX.89526893 | 7.24E+08 | 0.06 | -5.09 | 3.44 | 0.05 |
| E1 | GY | 4A | AX.89462486 | 7.32E+08 | 0.27 | -3.43 | 5.05 | 0.08 |
| E1 | GY | 4A | AX.89462486 | 7.32E+08 | 0.27 | -3.43 | 5.05 | 0.08 |
| E1 | GY | 4A | AX.89706173 | 7.32E+08 | 0.27 | -3.43 | 5.05 | 0.08 |
| E1 | GY | 4A | AX.89466707 | 7.27E+08 | 0.13 | -3.32 | 3.06 | 0.05 |
| E1 | GY | 4A | AX.89491474 | 7.28E+08 | 0.15 | -3.40 | 3.42 | 0.05 |
| E1 | GY | 4A | AX.89338338 | 7.43E+08 | 0.21 | -3.25 | 4.00 | 0.06 |
| E1 | GY | 4A | AX.89537632 | 7.22E+08 | 0.21 | -3.06 | 3.64 | 0.06 |
| E1 | GY | 4A | AX.89556734 | 7.20E+08 | 0.17 | -3.02 | 3.10 | 0.05 |
| E1 | GY | 4A | AX.89534158 | 7.31E+08 | 0.15 | -3.18 | 3.05 | 0.04 |
| E1 | GY | 4A | AX.89393646 | 7.30E+08 | 0.23 | -3.46 | 4.76 | 0.07 |
| E1 | GY | 4A | AX.89557030 | 7.39E+08 | 0.16 | -3.67 | 4.16 | 0.07 |
| E1 | GY | 4A | AX.89677918 | 7.28E+08 | 0.27 | -3.70 | 5.84 | 0.09 |
| E1 | GY | 4A | AX.89545628 | 7.24E+08 | 0.12 | -3.61 | 3.26 | 0.05 |
| E1 | GY | 4A | AX.89480219 | 7.30E+08 | 0.13 | -3.53 | 3.41 | 0.05 |
| E1 | GY | 4A | AX.89499424 | 7.24E+08 | 0.10 | -3.81 | 3.16 | 0.05 |
| E1 | GY | 4A | AX.89516106 | 7.24E+08 | 0.19 | -3.36 | 3.99 | 0.06 |
| E1 | GY | 4A | AX.89503717 | 7.10E+08 | 0.16 | -3.16 | 3.15 | 0.06 |

|    |      |    |             |          |      |       |      |      |
|----|------|----|-------------|----------|------|-------|------|------|
| E1 | GY   | 4A | AX.89534997 | 7.26E+08 | 0.18 | -3.53 | 4.12 | 0.06 |
| E1 | GY   | 4A | AX.89328721 | 7.39E+08 | 0.16 | -3.67 | 4.16 | 0.07 |
| E1 | GY   | 4A | AX.89682510 | 7.08E+08 | 0.15 | -3.31 | 3.26 | 0.06 |
| E1 | GY   | 4A | AX.89610216 | 7.30E+08 | 0.20 | -2.82 | 3.04 | 0.04 |
| E1 | GY   | 4A | AX.89610216 | 7.30E+08 | 0.20 | -2.82 | 3.04 | 0.04 |
| E1 | GY   | 4A | AX.89351599 | 7.30E+08 | 0.20 | -3.47 | 4.41 | 0.07 |
| E1 | GY   | 4A | AX.89482221 | 7.06E+08 | 0.16 | -3.16 | 3.15 | 0.06 |
| E1 | GY   | 4A | AX.89482221 | 7.06E+08 | 0.16 | -3.16 | 3.15 | 0.06 |
| E1 | SPM2 | 4A | AX.89722769 | 6.15E+08 | 0.34 | 17.54 | 3.17 | 0.06 |
| E1 | GY   | 4A | AX.89769007 | 7.41E+08 | 0.33 | -2.93 | 4.29 | 0.06 |
| E1 | GY   | 4A | AX.86163267 | 7.06E+08 | 0.16 | -3.16 | 3.15 | 0.06 |
| E1 | GY   | 4A | AX.89347832 | 7.22E+08 | 0.17 | -3.14 | 3.25 | 0.06 |
| E1 | GY   | 4A | AX.89504759 | 7.25E+08 | 0.13 | -3.35 | 3.11 | 0.05 |
| E1 | GY   | 4A | AX.89411907 | 7.27E+08 | 0.16 | -3.43 | 3.63 | 0.06 |
| E1 | GY   | 4A | AX.89446608 | 7.25E+08 | 0.14 | -3.51 | 3.54 | 0.05 |
| E1 | GY   | 4A | AX.89445680 | 7.31E+08 | 0.23 | -3.78 | 5.58 | 0.09 |
| E1 | GY   | 4A | AX.89751035 | 7.27E+08 | 0.21 | -3.46 | 4.45 | 0.07 |
| E1 | GY   | 4A | AX.89407940 | 7.23E+08 | 0.12 | -3.61 | 3.26 | 0.05 |
| E1 | GY   | 4A | AX.89634915 | 7.24E+08 | 0.11 | -3.60 | 3.06 | 0.05 |
| E1 | GY   | 4A | AX.89635144 | 7.31E+08 | 0.27 | -3.78 | 6.02 | 0.10 |
| E1 | GY   | 4A | AX.89412618 | 7.34E+08 | 0.14 | -3.62 | 3.72 | 0.06 |
| E1 | GY   | 4A | AX.89630821 | 7.24E+08 | 0.12 | -3.61 | 3.26 | 0.05 |
| E1 | GY   | 4A | AX.89314907 | 7.22E+08 | 0.22 | -2.94 | 3.44 | 0.06 |
| E1 | GY   | 4A | AX.89412766 | 7.37E+08 | 0.14 | -3.43 | 3.40 | 0.05 |
| E1 | GY   | 4A | AX.89436017 | 7.25E+08 | 0.06 | -5.45 | 3.63 | 0.06 |
| E1 | GY   | 4A | AX.89684381 | 7.40E+08 | 0.36 | -3.26 | 5.34 | 0.08 |
| E1 | GY   | 4A | AX.89684381 | 7.40E+08 | 0.36 | -3.26 | 5.34 | 0.08 |
| E1 | GY   | 4A | AX.86166488 | 7.41E+08 | 0.21 | -3.10 | 3.73 | 0.06 |
| E1 | GY   | 4A | AX.89330690 | 7.34E+08 | 0.21 | -2.83 | 3.20 | 0.05 |
| E1 | GY   | 4A | AX.89643739 | 7.24E+08 | 0.07 | -5.67 | 4.40 | 0.07 |
| E1 | GY   | 4A | AX.89757043 | 7.24E+08 | 0.12 | -3.61 | 3.26 | 0.05 |
| E1 | GY   | 4A | AX.89342097 | 7.20E+08 | 0.21 | -2.82 | 3.16 | 0.05 |
| E1 | GY   | 4A | AX.89608735 | 7.39E+08 | 0.10 | -4.10 | 3.59 | 0.06 |
| E1 | GY   | 4A | AX.89588539 | 7.22E+08 | 0.22 | -2.75 | 3.11 | 0.05 |
| E1 | GY   | 4A | AX.89644184 | 7.33E+08 | 0.21 | -2.99 | 3.46 | 0.05 |
| E1 | GY   | 4A | AX.89548890 | 7.25E+08 | 0.11 | -4.13 | 3.87 | 0.06 |
| E1 | GY   | 4A | AX.89484604 | 7.40E+08 | 0.26 | -3.62 | 5.45 | 0.09 |
| E1 | GY   | 4A | AX.89698578 | 7.20E+08 | 0.22 | -2.85 | 3.31 | 0.06 |
| E1 | GY   | 4A | AX.89698578 | 7.20E+08 | 0.22 | -2.85 | 3.31 | 0.06 |
| E1 | GY   | 4A | AX.89495274 | 7.22E+08 | 0.17 | -3.14 | 3.25 | 0.06 |
| E1 | SPM2 | 4A | AX.89526889 | 6.15E+08 | 0.35 | 18.82 | 3.62 | 0.07 |
| E1 | GY   | 4A | AX.89499280 | 7.26E+08 | 0.15 | -3.57 | 3.73 | 0.06 |
| E1 | GY   | 4A | AX.89499407 | 7.30E+08 | 0.15 | -3.16 | 3.08 | 0.05 |
| E1 | GY   | 4A | AX.89703275 | 7.22E+08 | 0.17 | -3.09 | 3.15 | 0.06 |
| E1 | GY   | 4A | AX.89609481 | 7.30E+08 | 0.20 | -3.35 | 4.09 | 0.06 |
| E1 | GY   | 4A | AX.89398534 | 7.26E+08 | 0.09 | -4.18 | 3.45 | 0.05 |
| E1 | GY   | 4A | AX.89764094 | 7.24E+08 | 0.12 | -3.61 | 3.26 | 0.05 |
| E1 | GY   | 4A | AX.89661917 | 7.19E+08 | 0.23 | -2.73 | 3.16 | 0.05 |
| E1 | GY   | 4A | AX.89313341 | 7.39E+08 | 0.12 | -3.87 | 3.58 | 0.05 |
| E1 | GY   | 4A | AX.89414590 | 7.30E+08 | 0.17 | -3.31 | 3.56 | 0.05 |



|    |    |    |             |          |      |       |      |      |
|----|----|----|-------------|----------|------|-------|------|------|
| E1 | GY | 4A | AX.89602206 | 7.24E+08 | 0.06 | -5.45 | 3.63 | 0.06 |
| E1 | GY | 4A | AX.89520266 | 7.26E+08 | 0.20 | -2.95 | 3.27 | 0.05 |
| E1 | GY | 4A | AX.89321887 | 7.23E+08 | 0.06 | -5.17 | 3.53 | 0.06 |
| E1 | GY | 4A | AX.89674921 | 7.08E+08 | 0.16 | -3.16 | 3.15 | 0.06 |
| E1 | GY | 4A | AX.89674921 | 7.08E+08 | 0.16 | -3.16 | 3.15 | 0.06 |
| E1 | GY | 4A | AX.89712068 | 7.24E+08 | 0.07 | -5.67 | 4.40 | 0.07 |
| E1 | GY | 4A | AX.89759750 | 7.22E+08 | 0.16 | -3.31 | 3.48 | 0.06 |
| E1 | GY | 4A | AX.89563022 | 7.33E+08 | 0.22 | -3.03 | 3.67 | 0.06 |
| E1 | GY | 4A | AX.89761056 | 7.30E+08 | 0.15 | -3.40 | 3.42 | 0.05 |
| E1 | GY | 4A | AX.89566818 | 7.24E+08 | 0.07 | -5.67 | 4.40 | 0.07 |
| E1 | GY | 4A | AX.89555093 | 7.33E+08 | 0.22 | -3.25 | 4.11 | 0.06 |
| E1 | GY | 4A | AX.89578493 | 7.20E+08 | 0.17 | -3.02 | 3.10 | 0.05 |
| E1 | GY | 4A | AX.89672155 | 7.37E+08 | 0.14 | -3.43 | 3.40 | 0.05 |
| E1 | GY | 4A | AX.89668144 | 7.39E+08 | 0.15 | -3.46 | 3.52 | 0.05 |
| E1 | GY | 4A | AX.89345065 | 7.21E+08 | 0.22 | -2.77 | 3.16 | 0.05 |
| E1 | GY | 4A | AX.89404612 | 7.30E+08 | 0.19 | -3.56 | 4.39 | 0.07 |
| E1 | GY | 4A | AX.89652502 | 7.28E+08 | 0.22 | -3.63 | 5.06 | 0.08 |
| E1 | GY | 4A | AX.89652502 | 7.28E+08 | 0.22 | -3.63 | 5.06 | 0.08 |
| E1 | GY | 4A | AX.89664678 | 7.28E+08 | 0.15 | -3.91 | 4.37 | 0.07 |
| E1 | GY | 4A | AX.89522297 | 7.23E+08 | 0.12 | -3.61 | 3.26 | 0.05 |
| E1 | GY | 4A | AX.89522297 | 7.23E+08 | 0.12 | -3.61 | 3.26 | 0.05 |
| E1 | GY | 4A | AX.89522316 | 7.20E+08 | 0.22 | -2.85 | 3.31 | 0.06 |
| E1 | GY | 4A | AX.89639515 | 7.24E+08 | 0.07 | -4.93 | 3.65 | 0.06 |
| E1 | GY | 4A | AX.89462343 | 7.27E+08 | 0.27 | -3.70 | 5.84 | 0.09 |
| E1 | GY | 4A | AX.89684945 | 6.64E+08 | 0.20 | -3.08 | 3.58 | 0.05 |
| E1 | GY | 4A | AX.89369902 | 7.20E+08 | 0.17 | -3.14 | 3.25 | 0.06 |
| E1 | GY | 4A | AX.89498509 | 7.26E+08 | 0.18 | -3.29 | 3.71 | 0.06 |
| E1 | GY | 4A | AX.89484604 | 7.40E+08 | 0.26 | -3.62 | 5.45 | 0.09 |
| E1 | GY | 4A | AX.89312590 | 7.21E+08 | 0.22 | -2.94 | 3.44 | 0.06 |
| E1 | GY | 4A | AX.89440747 | 7.30E+08 | 0.22 | -3.87 | 5.58 | 0.09 |
| E1 | GY | 4A | AX.89440747 | 7.30E+08 | 0.22 | -3.87 | 5.58 | 0.09 |
| E1 | GY | 4A | AX.89616966 | 7.25E+08 | 0.11 | -3.67 | 3.06 | 0.05 |
| E1 | GY | 4A | AX.89417541 | 7.10E+08 | 0.14 | -3.61 | 3.71 | 0.07 |
| E1 | GY | 4A | AX.89523678 | 7.26E+08 | 0.18 | -3.53 | 4.12 | 0.06 |
| E1 | GY | 4A | AX.89346434 | 7.32E+08 | 0.26 | -3.45 | 5.01 | 0.08 |
| E1 | GY | 4A | AX.89335287 | 7.34E+08 | 0.14 | -3.62 | 3.72 | 0.06 |
| E1 | GY | 4A | AX.89531127 | 7.24E+08 | 0.11 | -4.49 | 4.49 | 0.07 |
| E1 | GY | 4A | AX.89328332 | 7.39E+08 | 0.11 | -4.03 | 3.60 | 0.06 |
| E1 | GY | 4A | AX.89680594 | 7.26E+08 | 0.18 | -3.29 | 3.71 | 0.06 |
| E1 | GY | 4A | AX.89739556 | 4.10E+07 | 0.11 | -3.73 | 3.15 | 0.05 |
| E1 | GY | 4A | AX.89471816 | 7.28E+08 | 0.20 | -3.46 | 4.25 | 0.07 |
| E1 | GY | 4A | AX.89731769 | 7.27E+08 | 0.22 | -3.52 | 4.72 | 0.07 |
| E1 | GY | 4A | AX.89452602 | 7.24E+08 | 0.09 | -4.86 | 4.48 | 0.07 |
| E1 | GY | 4A | AX.89617589 | 4.11E+07 | 0.11 | -3.73 | 3.15 | 0.05 |
| E1 | GY | 4A | AX.89557779 | 7.30E+08 | 0.15 | -3.47 | 3.55 | 0.05 |
| E1 | GY | 4A | AX.89629181 | 7.39E+08 | 0.16 | -3.67 | 4.16 | 0.07 |
| E1 | GY | 4A | AX.89347361 | 7.24E+08 | 0.06 | -5.17 | 3.53 | 0.06 |
| E1 | GY | 4A | AX.89524550 | 7.39E+08 | 0.11 | -4.03 | 3.60 | 0.06 |
| E1 | GY | 4A | AX.89594507 | 7.31E+08 | 0.27 | -3.77 | 6.06 | 0.10 |
| E1 | GY | 4A | AX.89594775 | 7.18E+08 | 0.26 | -2.67 | 3.24 | 0.05 |

|    |    |    |             |          |      |       |      |      |
|----|----|----|-------------|----------|------|-------|------|------|
| E1 | GY | 4A | AX.89554610 | 7.20E+08 | 0.22 | -2.94 | 3.44 | 0.06 |
| E1 | GY | 4A | AX.89347832 | 7.22E+08 | 0.17 | -3.14 | 3.25 | 0.06 |
| E1 | GY | 4A | AX.89360038 | 7.33E+08 | 0.22 | -3.03 | 3.67 | 0.06 |
| E1 | GY | 4A | AX.89314231 | 7.39E+08 | 0.16 | -3.52 | 3.79 | 0.06 |
| E1 | GY | 4A | AX.89360065 | 7.27E+08 | 0.27 | -3.70 | 5.84 | 0.09 |
| E1 | GY | 4A | AX.89704631 | 7.26E+08 | 0.13 | -3.75 | 3.69 | 0.06 |
| E1 | GY | 4A | AX.89707099 | 7.41E+08 | 0.33 | -3.69 | 6.43 | 0.10 |
| E1 | GY | 4A | AX.89707630 | 7.27E+08 | 0.07 | -4.59 | 3.23 | 0.05 |
| E1 | GY | 4A | AX.89369162 | 7.26E+08 | 0.20 | -2.95 | 3.27 | 0.05 |
| E1 | GY | 4A | AX.89420090 | 7.30E+08 | 0.16 | -3.57 | 3.96 | 0.06 |
| E1 | GY | 4A | AX.89749239 | 7.19E+08 | 0.17 | -3.14 | 3.25 | 0.06 |
| E1 | GY | 4A | AX.89454827 | 7.21E+08 | 0.17 | -3.02 | 3.04 | 0.05 |
| E1 | GY | 4A | AX.89384587 | 7.31E+08 | 0.06 | -4.71 | 3.01 | 0.05 |
| E1 | GY | 4A | AX.89409546 | 7.23E+08 | 0.06 | -5.17 | 3.53 | 0.06 |
| E1 | GY | 4A | AX.89592754 | 7.26E+08 | 0.12 | -3.87 | 3.57 | 0.05 |
| E1 | GY | 4A | AX.89455084 | 7.31E+08 | 0.27 | -3.77 | 6.06 | 0.10 |
| E1 | GY | 4A | AX.89706173 | 7.32E+08 | 0.27 | -3.43 | 5.05 | 0.08 |
| E1 | GY | 4A | AX.89775914 | 7.44E+08 | 0.07 | -4.53 | 3.15 | 0.05 |
| E1 | GY | 4A | AX.89549210 | 7.39E+08 | 0.15 | -3.46 | 3.52 | 0.05 |
| E1 | GY | 4A | AX.89644669 | 7.39E+08 | 0.16 | -3.67 | 4.16 | 0.07 |
| E1 | GY | 4A | AX.89644669 | 7.39E+08 | 0.16 | -3.67 | 4.16 | 0.07 |
| E1 | GY | 4A | AX.89767319 | 7.24E+08 | 0.06 | -5.17 | 3.53 | 0.06 |
| E1 | GY | 4A | AX.89499280 | 7.26E+08 | 0.15 | -3.57 | 3.73 | 0.06 |
| E1 | GY | 4A | AX.89743401 | 7.33E+08 | 0.19 | -2.99 | 3.25 | 0.05 |
| E1 | GY | 4A | AX.89515992 | 7.25E+08 | 0.21 | -2.77 | 3.07 | 0.04 |
| E1 | GY | 4A | AX.89515992 | 7.25E+08 | 0.21 | -2.77 | 3.07 | 0.04 |
| E1 | GY | 4A | AX.89452318 | 7.23E+08 | 0.06 | -5.45 | 3.63 | 0.06 |
| E1 | GY | 4A | AX.89480219 | 7.30E+08 | 0.13 | -3.53 | 3.41 | 0.05 |
| E1 | GY | 4A | AX.89328298 | 7.31E+08 | 0.19 | -4.41 | 6.45 | 0.11 |
| E1 | GY | 4A | AX.89321025 | 7.34E+08 | 0.14 | -3.43 | 3.40 | 0.05 |
| E1 | GY | 4A | AX.89422048 | 7.31E+08 | 0.20 | -4.25 | 6.23 | 0.10 |
| E1 | GY | 4A | AX.89422048 | 7.31E+08 | 0.20 | -4.25 | 6.23 | 0.10 |
| E1 | GY | 4A | AX.89768703 | 7.40E+08 | 0.27 | -3.09 | 4.26 | 0.07 |
| E1 | GY | 4A | AX.89744180 | 7.19E+08 | 0.22 | -2.75 | 3.11 | 0.05 |
| E1 | GY | 4A | AX.89351503 | 7.26E+08 | 0.18 | -3.14 | 3.36 | 0.05 |
| E1 | GY | 4A | AX.89710964 | 7.30E+08 | 0.26 | -3.65 | 5.61 | 0.09 |
| E1 | GY | 4A | AX.89719378 | 7.24E+08 | 0.12 | -3.71 | 3.33 | 0.05 |
| E1 | GY | 4A | AX.89618065 | 7.27E+08 | 0.17 | -3.18 | 3.31 | 0.05 |
| E1 | GY | 4A | AX.89744514 | 7.20E+08 | 0.21 | -3.10 | 3.67 | 0.06 |
| E1 | GY | 4A | AX.89599133 | 7.40E+08 | 0.34 | -3.40 | 5.67 | 0.09 |
| E1 | GY | 4A | AX.89504759 | 7.25E+08 | 0.13 | -3.35 | 3.11 | 0.05 |
| E1 | GY | 4A | AX.89727024 | 7.23E+08 | 0.12 | -3.61 | 3.26 | 0.05 |
| E1 | GY | 4A | AX.89529222 | 7.26E+08 | 0.24 | -3.21 | 4.26 | 0.07 |
| E1 | GY | 4A | AX.86163811 | 7.39E+08 | 0.09 | -4.19 | 3.32 | 0.05 |
| E1 | GY | 4A | AX.86163811 | 7.39E+08 | 0.09 | -4.19 | 3.32 | 0.05 |
| E1 | GY | 4A | AX.89482915 | 7.04E+08 | 0.16 | -3.16 | 3.15 | 0.06 |
| E1 | GY | 4A | AX.89486705 | 7.27E+08 | 0.23 | -3.52 | 4.85 | 0.08 |
| E1 | GY | 4A | AX.89412597 | 7.27E+08 | 0.13 | -3.91 | 3.95 | 0.06 |
| E1 | GY | 4A | AX.89663848 | 7.40E+08 | 0.21 | -3.44 | 4.48 | 0.07 |
| E1 | GY | 4A | AX.89611401 | 7.20E+08 | 0.22 | -2.85 | 3.31 | 0.06 |

|    |    |    |             |          |      |       |      |      |
|----|----|----|-------------|----------|------|-------|------|------|
| E1 | GY | 4A | AX.89536634 | 7.31E+08 | 0.15 | -4.19 | 4.92 | 0.08 |
| E1 | GY | 4A | AX.89552078 | 7.09E+08 | 0.15 | -3.35 | 3.34 | 0.06 |
| E1 | GY | 4A | AX.89483845 | 7.23E+08 | 0.07 | -5.67 | 4.40 | 0.07 |
| E1 | GY | 4A | AX.89530069 | 7.40E+08 | 0.17 | -3.58 | 4.06 | 0.06 |
| E1 | GY | 4A | AX.89377182 | 7.27E+08 | 0.21 | -3.53 | 4.68 | 0.07 |
| E1 | GY | 4A | AX.89610678 | 7.26E+08 | 0.20 | -2.95 | 3.27 | 0.05 |
| E1 | GY | 4A | AX.89757043 | 7.24E+08 | 0.12 | -3.61 | 3.26 | 0.05 |
| E1 | GY | 4A | AX.89608735 | 7.39E+08 | 0.10 | -4.10 | 3.59 | 0.06 |
| E1 | GY | 4A | AX.89680753 | 7.26E+08 | 0.14 | -3.30 | 3.10 | 0.05 |
| E1 | GY | 4A | AX.89588539 | 7.22E+08 | 0.22 | -2.75 | 3.11 | 0.05 |
| E1 | GY | 4A | AX.89518923 | 7.24E+08 | 0.12 | -3.61 | 3.26 | 0.05 |
| E1 | GY | 4A | AX.89518923 | 7.24E+08 | 0.12 | -3.61 | 3.26 | 0.05 |
| E1 | GY | 4A | AX.89455084 | 7.31E+08 | 0.27 | -3.77 | 6.06 | 0.10 |
| E1 | GY | 4A | AX.89767110 | 7.21E+08 | 0.23 | -2.73 | 3.16 | 0.05 |
| E1 | GY | 4A | AX.89564765 | 7.39E+08 | 0.13 | -3.60 | 3.51 | 0.05 |
| E1 | GY | 4A | AX.89421360 | 7.22E+08 | 0.17 | -3.14 | 3.25 | 0.06 |
| E1 | GY | 4A | AX.89491600 | 7.20E+08 | 0.21 | -2.73 | 3.00 | 0.05 |
| E1 | GY | 4A | AX.89495274 | 7.22E+08 | 0.17 | -3.14 | 3.25 | 0.06 |
| E1 | GY | 4A | AX.89565646 | 7.43E+08 | 0.21 | -3.25 | 4.00 | 0.06 |
| E1 | GY | 4A | AX.89495581 | 7.21E+08 | 0.23 | -2.73 | 3.16 | 0.05 |
| E1 | GY | 4A | AX.89495581 | 7.21E+08 | 0.23 | -2.73 | 3.16 | 0.05 |
| E1 | GY | 4A | AX.89448771 | 7.24E+08 | 0.06 | -5.45 | 3.63 | 0.06 |
| E1 | GY | 4A | AX.89448771 | 7.24E+08 | 0.06 | -5.45 | 3.63 | 0.06 |
| E1 | GY | 4A | AX.89577216 | 7.06E+08 | 0.16 | -3.16 | 3.15 | 0.06 |
| E1 | GY | 4A | AX.89735480 | 7.40E+08 | 0.36 | -3.26 | 5.34 | 0.08 |
| E1 | GY | 4A | AX.89636971 | 4.04E+07 | 0.11 | -3.73 | 3.15 | 0.05 |
| E1 | GY | 4A | AX.89576737 | 7.34E+08 | 0.21 | -3.02 | 3.56 | 0.05 |
| E1 | GY | 4A | AX.89459794 | 7.40E+08 | 0.14 | -3.28 | 3.16 | 0.05 |
| E1 | GY | 4A | AX.89747478 | 7.41E+08 | 0.36 | -3.26 | 5.34 | 0.08 |
| E1 | GY | 4A | AX.89772769 | 7.22E+08 | 0.17 | -3.14 | 3.25 | 0.06 |
| E1 | GY | 4A | AX.89354777 | 7.26E+08 | 0.09 | -3.98 | 3.16 | 0.05 |
| E1 | GY | 4A | AX.89343528 | 1.76E+07 | 0.27 | 3.13  | 4.32 | 0.08 |
| E1 | GY | 4A | AX.89602206 | 7.24E+08 | 0.06 | -5.45 | 3.63 | 0.06 |
| E1 | GY | 4A | AX.89542047 | 7.24E+08 | 0.12 | -3.61 | 3.26 | 0.05 |
| E1 | GY | 4A | AX.89760308 | 7.21E+08 | 0.17 | -3.14 | 3.25 | 0.06 |
| E1 | GY | 4A | AX.89662356 | 7.26E+08 | 0.24 | -2.96 | 3.67 | 0.05 |
| E1 | GY | 4A | AX.89321874 | 7.26E+08 | 0.08 | -4.16 | 3.15 | 0.05 |
| E1 | GY | 4A | AX.89426288 | 6.61E+08 | 0.10 | -3.77 | 3.10 | 0.05 |
| E1 | GY | 4A | AX.89322015 | 7.39E+08 | 0.11 | -4.03 | 3.60 | 0.06 |
| E1 | GY | 4A | AX.89520523 | 7.24E+08 | 0.06 | -5.45 | 3.63 | 0.06 |
| E1 | GY | 4A | AX.89566336 | 7.27E+08 | 0.16 | -4.09 | 4.93 | 0.08 |
| E1 | GY | 4A | AX.89554375 | 7.27E+08 | 0.23 | -3.49 | 4.78 | 0.08 |
| E1 | GY | 4A | AX.89707063 | 7.39E+08 | 0.16 | -3.67 | 4.16 | 0.07 |
| E1 | GY | 4A | AX.89708349 | 7.31E+08 | 0.17 | -3.41 | 3.82 | 0.06 |
| E1 | GY | 4A | AX.89663245 | 7.19E+08 | 0.17 | -3.14 | 3.25 | 0.06 |
| E1 | GY | 4A | AX.89400318 | 7.31E+08 | 0.09 | -4.19 | 3.46 | 0.05 |
| E1 | GY | 4A | AX.89622319 | 7.41E+08 | 0.26 | -3.58 | 5.42 | 0.09 |
| E1 | GY | 4A | AX.89651575 | 7.24E+08 | 0.07 | -5.67 | 4.40 | 0.07 |
| E1 | GY | 4A | AX.89450913 | 7.27E+08 | 0.16 | -4.17 | 5.12 | 0.08 |
| E1 | GY | 4A | AX.89668144 | 7.39E+08 | 0.15 | -3.46 | 3.52 | 0.05 |

|    |    |    |             |          |      |       |      |      |
|----|----|----|-------------|----------|------|-------|------|------|
| E1 | GY | 4A | AX.89532662 | 7.40E+08 | 0.27 | -3.37 | 5.01 | 0.08 |
| E1 | GY | 4A | AX.89333861 | 7.26E+08 | 0.18 | -3.29 | 3.71 | 0.06 |
| E1 | GY | 4A | AX.89615361 | 7.24E+08 | 0.06 | -5.45 | 3.63 | 0.06 |
| E1 | GY | 4A | AX.89451460 | 6.47E+08 | 0.17 | -3.10 | 3.18 | 0.05 |
| E1 | GY | 4A | AX.89726325 | 7.29E+08 | 0.15 | -3.40 | 3.42 | 0.05 |
| E1 | GY | 4A | AX.89342097 | 7.20E+08 | 0.21 | -2.82 | 3.16 | 0.05 |
| E1 | GY | 4A | AX.89592754 | 7.26E+08 | 0.12 | -3.87 | 3.57 | 0.05 |
| E1 | GY | 4A | AX.89579660 | 7.26E+08 | 0.11 | -3.69 | 3.19 | 0.05 |
| E1 | GY | 4A | AX.89568535 | 7.31E+08 | 0.27 | -3.78 | 6.02 | 0.10 |
| E1 | GY | 4A | AX.89726883 | 7.41E+08 | 0.24 | -3.40 | 4.67 | 0.07 |
| E1 | GY | 4A | AX.89346010 | 7.32E+08 | 0.26 | -3.45 | 5.05 | 0.08 |
| E1 | GY | 4A | AX.89324248 | 7.43E+08 | 0.15 | -3.54 | 3.67 | 0.06 |
| E1 | GY | 4A | AX.89429351 | 7.27E+08 | 0.27 | -3.70 | 5.84 | 0.09 |
| E1 | GY | 4A | AX.89556734 | 7.20E+08 | 0.17 | -3.02 | 3.10 | 0.05 |
| E1 | GY | 4A | AX.89776312 | 7.22E+08 | 0.21 | -3.06 | 3.64 | 0.06 |
| E1 | GY | 4A | AX.89312590 | 7.21E+08 | 0.22 | -2.94 | 3.44 | 0.06 |
| E1 | GY | 4A | AX.89715796 | 7.04E+08 | 0.16 | -3.16 | 3.15 | 0.06 |
| E1 | GY | 4A | AX.89358742 | 7.10E+08 | 0.14 | -3.24 | 3.08 | 0.05 |
| E1 | GY | 4A | AX.89499679 | 7.26E+08 | 0.17 | -3.23 | 3.41 | 0.05 |
| E1 | GY | 4A | AX.89359076 | 7.28E+08 | 0.20 | -3.47 | 4.41 | 0.07 |
| E1 | GY | 4A | AX.89359076 | 7.28E+08 | 0.20 | -3.47 | 4.41 | 0.07 |
| E1 | GY | 4A | AX.89406883 | 7.26E+08 | 0.18 | -3.14 | 3.36 | 0.05 |
| E1 | GY | 4A | AX.89777164 | 7.28E+08 | 0.18 | -3.08 | 3.32 | 0.05 |
| E1 | GY | 4A | AX.89777164 | 7.28E+08 | 0.18 | -3.08 | 3.32 | 0.05 |
| E1 | GY | 4A | AX.89534997 | 7.26E+08 | 0.18 | -3.53 | 4.12 | 0.06 |
| E1 | GY | 4A | AX.89629079 | 7.28E+08 | 0.20 | -3.09 | 3.55 | 0.05 |
| E1 | GY | 4A | AX.89666696 | 7.43E+08 | 0.10 | -4.28 | 3.73 | 0.06 |
| E1 | GY | 4A | AX.89347361 | 7.24E+08 | 0.06 | -5.17 | 3.53 | 0.06 |
| E1 | GY | 4A | AX.89524550 | 7.39E+08 | 0.11 | -4.03 | 3.60 | 0.06 |
| E1 | GY | 4A | AX.89594507 | 7.31E+08 | 0.27 | -3.77 | 6.06 | 0.10 |
| E1 | GY | 4A | AX.89569986 | 7.24E+08 | 0.12 | -3.61 | 3.26 | 0.05 |
| E1 | GY | 4A | AX.89760720 | 1.76E+07 | 0.27 | 3.06  | 4.19 | 0.08 |
| E1 | GY | 4A | AX.89618065 | 7.27E+08 | 0.17 | -3.18 | 3.31 | 0.05 |
| E1 | GY | 4A | AX.89535906 | 7.41E+08 | 0.21 | -3.10 | 3.73 | 0.06 |
| E1 | GY | 4A | AX.89704157 | 7.25E+08 | 0.12 | -3.93 | 3.78 | 0.06 |
| E1 | GY | 4A | AX.89704157 | 7.25E+08 | 0.12 | -3.93 | 3.78 | 0.06 |
| E1 | GY | 4A | AX.89711147 | 7.39E+08 | 0.18 | -2.91 | 3.01 | 0.04 |
| E1 | GY | 4A | AX.89431718 | 7.31E+08 | 0.14 | -4.72 | 5.95 | 0.10 |
| E1 | GY | 4A | AX.89431718 | 7.31E+08 | 0.14 | -4.72 | 5.95 | 0.10 |
| E1 | GY | 4A | AX.89559394 | 7.33E+08 | 0.12 | -3.86 | 3.67 | 0.06 |
| E1 | GY | 4A | AX.89753010 | 7.05E+08 | 0.16 | -3.16 | 3.15 | 0.06 |
| E1 | GY | 4A | AX.89707630 | 7.27E+08 | 0.07 | -4.59 | 3.23 | 0.05 |
| E1 | GY | 4A | AX.89668236 | 7.33E+08 | 0.15 | -3.82 | 4.19 | 0.07 |
| E1 | GY | 4A | AX.89741478 | 7.28E+08 | 0.13 | -3.56 | 3.28 | 0.05 |
| E1 | GY | 4A | AX.89749239 | 7.19E+08 | 0.17 | -3.14 | 3.25 | 0.06 |
| E1 | GY | 4A | AX.89718118 | 7.22E+08 | 0.07 | -5.43 | 4.09 | 0.07 |
| E1 | GY | 4A | AX.89348972 | 7.32E+08 | 0.27 | -3.43 | 5.05 | 0.08 |
| E1 | GY | 4A | AX.89705660 | 7.40E+08 | 0.48 | -2.54 | 3.72 | 0.06 |
| E1 | GY | 4A | AX.89327236 | 7.20E+08 | 0.18 | -2.96 | 3.09 | 0.05 |
| E1 | GY | 4A | AX.89327430 | 7.26E+08 | 0.28 | -3.45 | 5.27 | 0.08 |

|    |    |    |             |          |      |       |      |      |
|----|----|----|-------------|----------|------|-------|------|------|
| E1 | GY | 4A | AX.89515035 | 7.28E+08 | 0.26 | -2.70 | 3.27 | 0.05 |
| E1 | GY | 4A | AX.89742680 | 7.31E+08 | 0.11 | -3.99 | 3.53 | 0.05 |
| E1 | GY | 4A | AX.89466707 | 7.27E+08 | 0.13 | -3.32 | 3.06 | 0.05 |
| E1 | GY | 4A | AX.89537546 | 7.31E+08 | 0.16 | -3.11 | 3.06 | 0.05 |
| E1 | GY | 4A | AX.89349918 | 7.40E+08 | 0.18 | -3.63 | 4.33 | 0.07 |
| E1 | GY | 4A | AX.89361955 | 7.39E+08 | 0.15 | -3.46 | 3.52 | 0.05 |
| E1 | GY | 4A | AX.89763075 | 7.26E+08 | 0.18 | -3.29 | 3.71 | 0.06 |
| E1 | GY | 4A | AX.89549210 | 7.39E+08 | 0.15 | -3.46 | 3.52 | 0.05 |
| E1 | GY | 4A | AX.89584410 | 7.31E+08 | 0.27 | -3.77 | 6.06 | 0.10 |
| E1 | GY | 4A | AX.89584410 | 7.31E+08 | 0.27 | -3.77 | 6.06 | 0.10 |
| E1 | GY | 4A | AX.89433453 | 7.41E+08 | 0.23 | -3.46 | 4.75 | 0.07 |
| E1 | GY | 4A | AX.89743266 | 4.09E+07 | 0.11 | -3.73 | 3.15 | 0.05 |
| E1 | GY | 4A | AX.89743401 | 7.33E+08 | 0.19 | -2.99 | 3.25 | 0.05 |
| E1 | GY | 4A | AX.89385734 | 7.26E+08 | 0.15 | -3.57 | 3.73 | 0.06 |
| E1 | GY | 4A | AX.89492172 | 6.17E+08 | 0.24 | -2.63 | 3.02 | 0.05 |
| E1 | GY | 4A | AX.89499424 | 7.24E+08 | 0.10 | -3.81 | 3.16 | 0.05 |
| E1 | GY | 4A | AX.89645053 | 7.24E+08 | 0.08 | -4.22 | 3.22 | 0.05 |
| E1 | GY | 4A | AX.89637945 | 7.26E+08 | 0.14 | -3.51 | 3.53 | 0.05 |
| E1 | GY | 4A | AX.89707039 | 7.27E+08 | 0.15 | -3.21 | 3.10 | 0.05 |
| E1 | GY | 4A | AX.89328354 | 7.39E+08 | 0.16 | -3.90 | 4.55 | 0.07 |
| E1 | GY | 4A | AX.89398873 | 7.21E+08 | 0.05 | -5.43 | 3.36 | 0.05 |
| E1 | GY | 4A | AX.89468094 | 7.41E+08 | 0.24 | -3.39 | 4.71 | 0.07 |
| E1 | GY | 4A | AX.89598281 | 7.31E+08 | 0.17 | -4.31 | 5.77 | 0.09 |
| E1 | GY | 4A | AX.89434141 | 7.22E+08 | 0.22 | -2.94 | 3.44 | 0.06 |
| E1 | GY | 4A | AX.89621604 | 7.31E+08 | 0.27 | -3.78 | 6.03 | 0.10 |
| E1 | GY | 4A | AX.89621604 | 7.31E+08 | 0.27 | -3.78 | 6.03 | 0.10 |
| E1 | GY | 4A | AX.89710964 | 7.30E+08 | 0.26 | -3.65 | 5.61 | 0.09 |
| E1 | GY | 4A | AX.89539186 | 7.43E+08 | 0.19 | -3.14 | 3.54 | 0.05 |
| E1 | GY | 4A | AX.89328992 | 7.33E+08 | 0.19 | -2.99 | 3.25 | 0.05 |
| E1 | GY | 4A | AX.89376272 | 7.26E+08 | 0.18 | -3.29 | 3.71 | 0.06 |
| E1 | GY | 4A | AX.89672103 | 6.02E+08 | 0.21 | -2.94 | 3.36 | 0.05 |
| E1 | GY | 4A | AX.89634915 | 7.24E+08 | 0.11 | -3.60 | 3.06 | 0.05 |
| E1 | GY | 4A | AX.89400490 | 7.24E+08 | 0.06 | -5.45 | 3.63 | 0.06 |
| E1 | GY | 4A | AX.89446849 | 7.21E+08 | 0.22 | -2.94 | 3.44 | 0.06 |
| E1 | GY | 4A | AX.89423577 | 7.26E+08 | 0.13 | -3.37 | 3.15 | 0.05 |
| E1 | GY | 4A | AX.89387465 | 7.17E+08 | 0.06 | -4.70 | 3.00 | 0.05 |
| E1 | GY | 4A | AX.89352927 | 7.20E+08 | 0.17 | -3.02 | 3.10 | 0.05 |
| E1 | GY | 4A | AX.89600383 | 4.09E+07 | 0.11 | -3.73 | 3.15 | 0.05 |
| E1 | GY | 4A | AX.89506180 | 7.37E+08 | 0.10 | -3.91 | 3.31 | 0.05 |
| E1 | GY | 4A | AX.89665964 | 7.41E+08 | 0.23 | -3.40 | 4.62 | 0.07 |
| E1 | GY | 4A | AX.89643739 | 7.24E+08 | 0.07 | -5.67 | 4.40 | 0.07 |
| E1 | GY | 4A | AX.89611873 | 7.19E+08 | 0.22 | -2.81 | 3.23 | 0.06 |
| E1 | GY | 4A | AX.89775815 | 7.24E+08 | 0.07 | -5.67 | 4.40 | 0.07 |
| E1 | GY | 4A | AX.89767110 | 7.21E+08 | 0.23 | -2.73 | 3.16 | 0.05 |
| E1 | GY | 4A | AX.89556447 | 7.39E+08 | 0.15 | -3.46 | 3.52 | 0.05 |
| E1 | GY | 4A | AX.89776093 | 7.31E+08 | 0.27 | -3.78 | 6.02 | 0.10 |
| E1 | GY | 4A | AX.89735480 | 7.40E+08 | 0.36 | -3.26 | 5.34 | 0.08 |
| E1 | GY | 4A | AX.89531127 | 7.24E+08 | 0.11 | -4.49 | 4.49 | 0.07 |
| E1 | GY | 4A | AX.89699271 | 7.22E+08 | 0.22 | -2.75 | 3.11 | 0.05 |
| E1 | GY | 4A | AX.89747478 | 7.41E+08 | 0.36 | -3.26 | 5.34 | 0.08 |

|    |    |    |             |          |      |       |      |      |
|----|----|----|-------------|----------|------|-------|------|------|
| E1 | GY | 4A | AX.89772769 | 7.22E+08 | 0.17 | -3.14 | 3.25 | 0.06 |
| E1 | GY | 4A | AX.89614087 | 4.10E+07 | 0.11 | -3.73 | 3.15 | 0.05 |
| E1 | GY | 4A | AX.89614087 | 4.10E+07 | 0.11 | -3.73 | 3.15 | 0.05 |
| E1 | GY | 4A | AX.89712135 | 7.25E+08 | 0.06 | -5.45 | 3.63 | 0.06 |
| E1 | GY | 4A | AX.89700054 | 7.25E+08 | 0.21 | -2.77 | 3.07 | 0.04 |
| E1 | GY | 4A | AX.89391099 | 7.24E+08 | 0.12 | -3.61 | 3.26 | 0.05 |
| E1 | GY | 4A | AX.89391099 | 7.24E+08 | 0.12 | -3.61 | 3.26 | 0.05 |
| E1 | GY | 4A | AX.89637968 | 7.41E+08 | 0.35 | -3.26 | 5.32 | 0.08 |
| E1 | GY | 4A | AX.89450476 | 7.26E+08 | 0.11 | -4.20 | 3.87 | 0.06 |
| E1 | GY | 4A | AX.89380026 | 7.24E+08 | 0.12 | -3.61 | 3.26 | 0.05 |
| E1 | GY | 4A | AX.89622319 | 7.41E+08 | 0.26 | -3.58 | 5.42 | 0.09 |
| E1 | GY | 4A | AX.89322993 | 7.39E+08 | 0.15 | -3.46 | 3.52 | 0.05 |
| E1 | GY | 4A | AX.89725490 | 7.40E+08 | 0.30 | -2.98 | 4.20 | 0.06 |
| E1 | GY | 4A | AX.89664021 | 7.25E+08 | 0.12 | -3.61 | 3.26 | 0.05 |
| E1 | GY | 4A | AX.89345065 | 7.21E+08 | 0.22 | -2.77 | 3.16 | 0.05 |
| E1 | GY | 4A | AX.89544271 | 4.09E+07 | 0.11 | -3.73 | 3.15 | 0.05 |
| E1 | GY | 4A | AX.89428619 | 7.22E+08 | 0.22 | -2.94 | 3.44 | 0.06 |
| E1 | GY | 4A | AX.89652625 | 7.30E+08 | 0.07 | -5.01 | 3.76 | 0.06 |
| E1 | GY | 4A | AX.89652625 | 7.30E+08 | 0.07 | -5.01 | 3.76 | 0.06 |
| E1 | GY | 4A | AX.89697948 | 7.11E+08 | 0.14 | -3.32 | 3.15 | 0.06 |
| E1 | GY | 4A | AX.89697948 | 7.11E+08 | 0.14 | -3.32 | 3.15 | 0.06 |
| E1 | GY | 4A | AX.89604647 | 7.22E+08 | 0.20 | -3.54 | 4.50 | 0.08 |
| E1 | GY | 4A | AX.89579752 | 7.43E+08 | 0.20 | -3.05 | 3.42 | 0.05 |
| E1 | GY | 4A | AX.89689789 | 7.25E+08 | 0.21 | -2.77 | 3.07 | 0.04 |
| E1 | GY | 4A | AX.89324248 | 7.43E+08 | 0.15 | -3.54 | 3.67 | 0.06 |
| E1 | GY | 4A | AX.89429351 | 7.27E+08 | 0.27 | -3.70 | 5.84 | 0.09 |
| E1 | GY | 4A | AX.89334772 | 4.09E+07 | 0.11 | -3.73 | 3.15 | 0.05 |
| E1 | GY | 4A | AX.89545470 | 7.16E+08 | 0.19 | -3.98 | 5.36 | 0.09 |
| E1 | GY | 4A | AX.89393646 | 7.30E+08 | 0.23 | -3.46 | 4.76 | 0.07 |
| E1 | GY | 4A | AX.89593512 | 7.39E+08 | 0.16 | -3.67 | 4.16 | 0.07 |
| E1 | GY | 4A | AX.89593512 | 7.39E+08 | 0.16 | -3.67 | 4.16 | 0.07 |
| E1 | GY | 4A | AX.89680594 | 7.26E+08 | 0.18 | -3.29 | 3.71 | 0.06 |
| E1 | GY | 4A | AX.89739538 | 4.04E+07 | 0.11 | -3.73 | 3.15 | 0.05 |
| E1 | GY | 4A | AX.89371009 | 7.26E+08 | 0.15 | -3.57 | 3.73 | 0.06 |
| E1 | GY | 4A | AX.89452602 | 7.24E+08 | 0.09 | -4.86 | 4.48 | 0.07 |
| E1 | GY | 4A | AX.89654418 | 7.24E+08 | 0.12 | -3.97 | 3.74 | 0.06 |
| E1 | GY | 4A | AX.89430756 | 7.24E+08 | 0.06 | -5.45 | 3.63 | 0.06 |
| E1 | GY | 4A | AX.89686985 | 7.25E+08 | 0.18 | -3.29 | 3.71 | 0.06 |
| E1 | GY | 4A | AX.89629721 | 7.41E+08 | 0.27 | -3.65 | 5.65 | 0.09 |
| E1 | GY | 4A | AX.89654995 | 7.27E+08 | 0.07 | -4.48 | 3.26 | 0.05 |
| E1 | GY | 4A | AX.89776458 | 7.08E+08 | 0.16 | -3.16 | 3.15 | 0.06 |
| E1 | GY | 4A | AX.89371746 | 7.31E+08 | 0.27 | -3.77 | 6.06 | 0.10 |
| E1 | GY | 4A | AX.89558474 | 7.41E+08 | 0.30 | -2.80 | 3.78 | 0.06 |
| E1 | GY | 4A | AX.89680337 | 7.20E+08 | 0.22 | -2.85 | 3.31 | 0.06 |
| E1 | GY | 4A | AX.89535906 | 7.41E+08 | 0.21 | -3.10 | 3.73 | 0.06 |
| E1 | GY | 4A | AX.89711147 | 7.39E+08 | 0.18 | -2.91 | 3.01 | 0.04 |
| E1 | GY | 4A | AX.89582475 | 7.40E+08 | 0.17 | -3.58 | 4.06 | 0.06 |
| E1 | GY | 4A | AX.89336562 | 7.05E+08 | 0.15 | -3.24 | 3.15 | 0.06 |
| E1 | GY | 4A | AX.89442700 | 7.26E+08 | 0.18 | -3.29 | 3.71 | 0.06 |
| E1 | GY | 4A | AX.89326485 | 7.27E+08 | 0.15 | -4.02 | 4.68 | 0.07 |

|    |     |    |             |          |      |       |      |      |
|----|-----|----|-------------|----------|------|-------|------|------|
| E1 | GY  | 4A | AX.89326485 | 7.27E+08 | 0.15 | -4.02 | 4.68 | 0.07 |
| E1 | GY  | 4A | AX.89638028 | 7.25E+08 | 0.14 | -3.69 | 3.77 | 0.06 |
| E1 | GY  | 4A | AX.89751035 | 7.27E+08 | 0.21 | -3.46 | 4.45 | 0.07 |
| E1 | GY  | 4A | AX.89709003 | 7.43E+08 | 0.09 | -4.52 | 3.78 | 0.06 |
| E1 | GY  | 4A | AX.89709003 | 7.43E+08 | 0.09 | -4.52 | 3.78 | 0.06 |
| E1 | GY  | 4A | AX.89432068 | 7.40E+08 | 0.20 | -3.24 | 3.86 | 0.06 |
| E1 | GY  | 4A | AX.89635496 | 7.40E+08 | 0.17 | -3.02 | 3.09 | 0.05 |
| E1 | GY  | 4A | AX.89775295 | 7.26E+08 | 0.20 | -2.95 | 3.27 | 0.05 |
| E1 | GY  | 4A | AX.89501646 | 7.25E+08 | 0.21 | -2.78 | 3.06 | 0.04 |
| E1 | GY  | 4A | AX.89515138 | 7.19E+08 | 0.22 | -2.75 | 3.11 | 0.05 |
| E1 | GY  | 4A | AX.89515138 | 7.19E+08 | 0.22 | -2.75 | 3.11 | 0.05 |
| E1 | GY  | 4A | AX.89479076 | 6.07E+07 | 0.11 | -3.65 | 3.03 | 0.05 |
| E1 | GY  | 4A | AX.89680789 | 7.25E+08 | 0.18 | -3.53 | 4.12 | 0.06 |
| E1 | GY  | 4A | AX.89680789 | 7.25E+08 | 0.18 | -3.53 | 4.12 | 0.06 |
| E1 | GY  | 4A | AX.89775914 | 7.44E+08 | 0.07 | -4.53 | 3.15 | 0.05 |
| E1 | GY  | 4A | AX.89503068 | 7.27E+08 | 0.15 | -3.58 | 3.74 | 0.06 |
| E1 | GY  | 4A | AX.89612888 | 7.26E+08 | 0.20 | -3.49 | 4.44 | 0.07 |
| E1 | GY  | 4A | AX.89612888 | 7.26E+08 | 0.20 | -3.49 | 4.44 | 0.07 |
| E1 | GY  | 4A | AX.89445272 | 7.22E+08 | 0.22 | -2.89 | 3.35 | 0.06 |
| E1 | GY  | 4A | AX.89452318 | 7.23E+08 | 0.06 | -5.45 | 3.63 | 0.06 |
| E1 | GY  | 4A | AX.89516106 | 7.24E+08 | 0.19 | -3.36 | 3.99 | 0.06 |
| E1 | GPS | 4A | AX.89342370 | 7.28E+08 | 0.17 | -1.52 | 3.25 | 0.05 |
| E1 | GY  | 4A | AX.89467705 | 7.34E+08 | 0.19 | -3.71 | 4.66 | 0.07 |
| E1 | GY  | 4A | AX.89411387 | 7.39E+08 | 0.15 | -3.29 | 3.24 | 0.05 |
| E1 | GY  | 4A | AX.89562467 | 4.09E+07 | 0.11 | -3.73 | 3.15 | 0.05 |
| E1 | GY  | 4A | AX.89610369 | 7.30E+08 | 0.17 | -3.80 | 4.60 | 0.07 |
| E1 | GY  | 4A | AX.86163366 | 7.41E+08 | 0.32 | -2.97 | 4.32 | 0.07 |
| E1 | GY  | 4A | AX.89760946 | 7.38E+08 | 0.14 | -3.31 | 3.20 | 0.05 |
| E1 | GY  | 4A | AX.89468920 | 7.22E+08 | 0.17 | -3.14 | 3.25 | 0.06 |
| E1 | GY  | 4A | AX.89412597 | 7.27E+08 | 0.13 | -3.91 | 3.95 | 0.06 |
| E1 | GY  | 4A | AX.89635144 | 7.31E+08 | 0.27 | -3.78 | 6.02 | 0.10 |
| E1 | GY  | 4A | AX.89505951 | 7.26E+08 | 0.18 | -3.29 | 3.71 | 0.06 |
| E1 | GY  | 4A | AX.86166488 | 7.41E+08 | 0.21 | -3.10 | 3.73 | 0.06 |
| E1 | GY  | 4A | AX.89518458 | 7.33E+08 | 0.22 | -3.03 | 3.67 | 0.06 |
| E1 | GY  | 4A | AX.89518458 | 7.33E+08 | 0.22 | -3.03 | 3.67 | 0.06 |
| E1 | GY  | 4A | AX.89729945 | 7.34E+08 | 0.12 | -3.55 | 3.08 | 0.05 |
| E1 | GY  | 4A | AX.89727342 | 7.23E+08 | 0.06 | -5.17 | 3.53 | 0.06 |
| E1 | GY  | 4A | AX.89727342 | 7.23E+08 | 0.06 | -5.17 | 3.53 | 0.06 |
| E1 | GY  | 4A | AX.89610678 | 7.26E+08 | 0.20 | -2.95 | 3.27 | 0.05 |
| E1 | GY  | 4A | AX.89484147 | 7.39E+08 | 0.13 | -3.69 | 3.68 | 0.06 |
| E1 | GY  | 4A | AX.89484147 | 7.39E+08 | 0.13 | -3.69 | 3.68 | 0.06 |
| E1 | GY  | 4A | AX.89734387 | 7.37E+08 | 0.14 | -3.43 | 3.40 | 0.05 |
| E1 | GY  | 4A | AX.89734387 | 7.37E+08 | 0.14 | -3.43 | 3.40 | 0.05 |
| E1 | GY  | 4A | AX.89578346 | 7.27E+08 | 0.20 | -2.86 | 3.06 | 0.04 |
| E1 | GY  | 4A | AX.89578346 | 7.27E+08 | 0.20 | -2.86 | 3.06 | 0.04 |
| E1 | GY  | 4A | AX.89342370 | 7.28E+08 | 0.17 | -3.95 | 4.93 | 0.08 |
| E1 | GY  | 4A | AX.89657236 | 7.25E+08 | 0.12 | -3.61 | 3.26 | 0.05 |
| E1 | GY  | 4A | AX.89657236 | 7.25E+08 | 0.12 | -3.61 | 3.26 | 0.05 |
| E1 | GY  | 4A | AX.89616966 | 7.25E+08 | 0.11 | -3.67 | 3.06 | 0.05 |
| E1 | GY  | 4A | AX.89530946 | 7.22E+08 | 0.22 | -2.75 | 3.11 | 0.05 |

|    |     |    |             |          |      |       |      |      |
|----|-----|----|-------------|----------|------|-------|------|------|
| E1 | GY  | 4A | AX.89499407 | 7.30E+08 | 0.15 | -3.16 | 3.08 | 0.05 |
| E1 | GY  | 4A | AX.89775360 | 7.33E+08 | 0.19 | -2.99 | 3.25 | 0.05 |
| E1 | GY  | 4A | AX.89777958 | 7.24E+08 | 0.07 | -5.57 | 4.27 | 0.07 |
| E1 | GY  | 4A | AX.89777958 | 7.24E+08 | 0.07 | -5.57 | 4.27 | 0.07 |
| E1 | GY  | 4A | AX.89561531 | 6.61E+08 | 0.10 | -3.77 | 3.10 | 0.05 |
| E1 | GY  | 4A | AX.89471816 | 7.28E+08 | 0.20 | -3.46 | 4.25 | 0.07 |
| E1 | GY  | 4A | AX.89735722 | 6.64E+08 | 0.20 | -3.08 | 3.58 | 0.05 |
| E1 | GY  | 4A | AX.89735722 | 6.64E+08 | 0.20 | -3.08 | 3.58 | 0.05 |
| E1 | GY  | 4A | AX.89343528 | 1.76E+07 | 0.27 | 3.13  | 4.32 | 0.08 |
| E1 | GY  | 4A | AX.89776011 | 7.21E+08 | 0.22 | -2.94 | 3.44 | 0.06 |
| E1 | GY  | 4A | AX.89776011 | 7.21E+08 | 0.22 | -2.94 | 3.44 | 0.06 |
| E1 | GY  | 4A | AX.89378887 | 7.25E+08 | 0.12 | -3.97 | 3.74 | 0.06 |
| E1 | GY  | 4A | AX.89378887 | 7.25E+08 | 0.12 | -3.97 | 3.74 | 0.06 |
| E1 | GY  | 4A | AX.89321887 | 7.23E+08 | 0.06 | -5.17 | 3.53 | 0.06 |
| E1 | GY  | 4A | AX.89520410 | 7.41E+08 | 0.24 | -3.39 | 4.71 | 0.07 |
| E1 | GY  | 4A | AX.89520410 | 7.41E+08 | 0.24 | -3.39 | 4.71 | 0.07 |
| E1 | GY  | 4A | AX.89712068 | 7.24E+08 | 0.07 | -5.67 | 4.40 | 0.07 |
| E1 | GY  | 4A | AX.89520523 | 7.24E+08 | 0.06 | -5.45 | 3.63 | 0.06 |
| E1 | GY  | 4A | AX.89727201 | 7.22E+08 | 0.22 | -2.77 | 3.16 | 0.05 |
| E1 | GY  | 4A | AX.89486310 | 7.33E+08 | 0.22 | -3.03 | 3.67 | 0.06 |
| E1 | GY  | 4A | AX.89486501 | 7.41E+08 | 0.35 | -3.24 | 5.28 | 0.08 |
| E1 | GY  | 4A | AX.89486501 | 7.41E+08 | 0.35 | -3.24 | 5.28 | 0.08 |
| E1 | GY  | 4A | AX.89333240 | 7.26E+08 | 0.18 | -3.29 | 3.71 | 0.06 |
| E1 | GY  | 4A | AX.89555093 | 7.33E+08 | 0.22 | -3.25 | 4.11 | 0.06 |
| E1 | GY  | 4A | AX.89497230 | 7.21E+08 | 0.22 | -2.77 | 3.16 | 0.05 |
| E1 | GY  | 4A | AX.89400318 | 7.31E+08 | 0.09 | -4.19 | 3.46 | 0.05 |
| E1 | GY  | 4A | AX.89525651 | 7.24E+08 | 0.07 | -5.67 | 4.40 | 0.07 |
| E1 | GY  | 4A | AX.89525651 | 7.24E+08 | 0.07 | -5.67 | 4.40 | 0.07 |
| E1 | GY  | 4A | AX.89598535 | 7.26E+08 | 0.15 | -3.65 | 3.88 | 0.06 |
| E1 | GY  | 4A | AX.89450913 | 7.27E+08 | 0.16 | -4.17 | 5.12 | 0.08 |
| E1 | GY  | 4A | AX.89766142 | 7.18E+08 | 0.27 | -2.54 | 3.03 | 0.05 |
| E1 | GY  | 4A | AX.89766142 | 7.18E+08 | 0.27 | -2.54 | 3.03 | 0.05 |
| E1 | GY  | 4A | AX.89775352 | 7.41E+08 | 0.24 | -3.39 | 4.71 | 0.07 |
| E1 | GY  | 4A | AX.89664678 | 7.28E+08 | 0.15 | -3.91 | 4.37 | 0.07 |
| E1 | GY  | 4A | AX.89474542 | 7.26E+08 | 0.24 | -3.21 | 4.26 | 0.07 |
| E1 | GY  | 4A | AX.89558641 | 7.39E+08 | 0.15 | -3.46 | 3.52 | 0.05 |
| E1 | GY  | 4A | AX.89558641 | 7.39E+08 | 0.15 | -3.46 | 3.52 | 0.05 |
| E1 | GY  | 4A | AX.89474564 | 7.26E+08 | 0.11 | -4.82 | 5.09 | 0.08 |
| E1 | GY  | 4A | AX.89451460 | 6.47E+08 | 0.17 | -3.10 | 3.18 | 0.05 |
| E1 | GY  | 4A | AX.89639515 | 7.24E+08 | 0.07 | -4.93 | 3.65 | 0.06 |
| E1 | GY  | 4A | AX.89380919 | 7.25E+08 | 0.06 | -5.45 | 3.63 | 0.06 |
| E1 | GY  | 4A | AX.89380919 | 7.25E+08 | 0.06 | -5.45 | 3.63 | 0.06 |
| E1 | GY  | 4A | AX.89369902 | 7.20E+08 | 0.17 | -3.14 | 3.25 | 0.06 |
| E1 | GY  | 4A | AX.89639898 | 7.44E+08 | 0.21 | -3.60 | 4.77 | 0.08 |
| E1 | GY  | 4A | AX.89639898 | 7.44E+08 | 0.21 | -3.60 | 4.77 | 0.08 |
| E1 | GPS | 4A | AX.89328298 | 7.31E+08 | 0.19 | -1.39 | 3.01 | 0.05 |
| E1 | GY  | 4A | AX.89690177 | 7.26E+08 | 0.18 | -3.29 | 3.71 | 0.06 |
| E1 | GY  | 4A | AX.89690177 | 7.26E+08 | 0.18 | -3.29 | 3.71 | 0.06 |
| E1 | GY  | 4A | AX.89417541 | 7.10E+08 | 0.14 | -3.61 | 3.71 | 0.07 |
| E1 | GY  | 4A | AX.89617069 | 7.28E+08 | 0.21 | -3.37 | 4.31 | 0.07 |



|    |     |    |             |          |      |       |      |      |
|----|-----|----|-------------|----------|------|-------|------|------|
| E1 | GY  | 4A | AX.89523678 | 7.26E+08 | 0.18 | -3.53 | 4.12 | 0.06 |
| E1 | GY  | 4A | AX.89512247 | 7.24E+08 | 0.12 | -3.61 | 3.26 | 0.05 |
| E1 | GY  | 4A | AX.89346434 | 7.32E+08 | 0.26 | -3.45 | 5.01 | 0.08 |
| E1 | GY  | 4A | AX.89371009 | 7.26E+08 | 0.15 | -3.57 | 3.73 | 0.06 |
| E1 | GY  | 4A | AX.89739538 | 4.04E+07 | 0.11 | -3.73 | 3.15 | 0.05 |
| E1 | GY  | 4A | AX.89524010 | 7.32E+08 | 0.26 | -3.45 | 5.01 | 0.08 |
| E1 | GY  | 4A | AX.89524010 | 7.32E+08 | 0.26 | -3.45 | 5.01 | 0.08 |
| E1 | GY  | 4A | AX.89443687 | 7.27E+08 | 0.07 | -4.41 | 3.02 | 0.05 |
| E1 | GY  | 4A | AX.89418224 | 7.24E+08 | 0.11 | -4.10 | 3.82 | 0.06 |
| E1 | GY  | 4A | AX.89686985 | 7.25E+08 | 0.18 | -3.29 | 3.71 | 0.06 |
| E1 | GY  | 4A | AX.89667062 | 7.22E+08 | 0.22 | -2.89 | 3.35 | 0.06 |
| E1 | GY  | 4A | AX.89546685 | 7.39E+08 | 0.18 | -3.24 | 3.62 | 0.05 |
| E1 | GY  | 4A | AX.89558474 | 7.41E+08 | 0.30 | -2.80 | 3.78 | 0.06 |
| E1 | GPS | 4A | AX.89440747 | 7.30E+08 | 0.22 | -1.34 | 3.07 | 0.05 |
| E1 | GY  | 4A | AX.89476973 | 7.30E+08 | 0.20 | -3.02 | 3.42 | 0.05 |
| E1 | GY  | 4A | AX.89704631 | 7.26E+08 | 0.13 | -3.75 | 3.69 | 0.06 |
| E1 | GY  | 4A | AX.89707099 | 7.41E+08 | 0.33 | -3.69 | 6.43 | 0.10 |
| E1 | GY  | 4A | AX.89420090 | 7.30E+08 | 0.16 | -3.57 | 3.96 | 0.06 |
| E1 | GY  | 4A | AX.89775295 | 7.26E+08 | 0.20 | -2.95 | 3.27 | 0.05 |
| E1 | GY  | 4A | AX.89348972 | 7.32E+08 | 0.27 | -3.43 | 5.05 | 0.08 |
| E1 | GY  | 4A | AX.89454827 | 7.21E+08 | 0.17 | -3.02 | 3.04 | 0.05 |
| E1 | GY  | 4A | AX.89373507 | 7.41E+08 | 0.30 | -2.68 | 3.49 | 0.05 |
| E1 | GY  | 4A | AX.89526893 | 7.24E+08 | 0.06 | -5.09 | 3.44 | 0.05 |
| E1 | GY  | 4A | AX.89349918 | 7.40E+08 | 0.18 | -3.63 | 4.33 | 0.07 |
| E1 | GY  | 4A | AX.89338338 | 7.43E+08 | 0.21 | -3.25 | 4.00 | 0.06 |
| E1 | GY  | 4A | AX.89640400 | 7.27E+08 | 0.13 | -3.64 | 3.50 | 0.05 |
| E1 | GY  | 4A | AX.89492022 | 7.30E+08 | 0.20 | -3.47 | 4.41 | 0.07 |
| E1 | GY  | 4A | AX.89385734 | 7.26E+08 | 0.15 | -3.57 | 3.73 | 0.06 |
| E1 | GY  | 4A | AX.89385882 | 7.29E+08 | 0.22 | -3.44 | 4.58 | 0.07 |
| E1 | GY  | 4A | AX.89637945 | 7.26E+08 | 0.14 | -3.51 | 3.53 | 0.05 |
| E1 | GY  | 4A | AX.89597931 | 7.27E+08 | 0.15 | -4.20 | 5.06 | 0.08 |
| E1 | GY  | 4A | AX.89597931 | 7.27E+08 | 0.15 | -4.20 | 5.06 | 0.08 |
| E1 | GY  | 4A | AX.89670415 | 7.22E+08 | 0.17 | -3.14 | 3.25 | 0.06 |
| E1 | GY  | 4A | AX.89719378 | 7.24E+08 | 0.12 | -3.71 | 3.33 | 0.05 |
| E1 | GY  | 4A | AX.89375502 | 7.40E+08 | 0.17 | -3.55 | 4.08 | 0.06 |
| E1 | GY  | 4A | AX.89599133 | 7.40E+08 | 0.34 | -3.40 | 5.67 | 0.09 |
| E1 | GY  | 4A | AX.89727024 | 7.23E+08 | 0.12 | -3.61 | 3.26 | 0.05 |
| E1 | GY  | 4A | AX.89446643 | 7.40E+08 | 0.36 | -3.26 | 5.34 | 0.08 |
| E1 | GY  | 4A | AX.89729045 | 7.33E+08 | 0.07 | -5.05 | 3.80 | 0.06 |
| E1 | GY  | 4A | AX.89407940 | 7.23E+08 | 0.12 | -3.61 | 3.26 | 0.05 |
| E1 | GY  | 4A | AX.89663848 | 7.40E+08 | 0.21 | -3.44 | 4.48 | 0.07 |
| E1 | GY  | 4A | AX.89571325 | 7.40E+08 | 0.26 | -3.40 | 4.93 | 0.08 |
| E1 | GY  | 4A | AX.89387465 | 7.17E+08 | 0.06 | -4.70 | 3.00 | 0.05 |
| E1 | GY  | 4A | AX.89600383 | 4.09E+07 | 0.11 | -3.73 | 3.15 | 0.05 |
| E1 | GY  | 4A | AX.89665964 | 7.41E+08 | 0.23 | -3.40 | 4.62 | 0.07 |
| E1 | GY  | 4A | AX.89483845 | 7.23E+08 | 0.07 | -5.67 | 4.40 | 0.07 |
| E1 | GY  | 4A | AX.89719476 | 7.41E+08 | 0.27 | -3.44 | 5.19 | 0.08 |
| E1 | GY  | 4A | AX.89707143 | 7.40E+08 | 0.25 | -3.68 | 5.55 | 0.09 |
| E1 | GY  | 4A | AX.89681093 | 7.40E+08 | 0.25 | -3.68 | 5.51 | 0.09 |
| E1 | GY  | 4A | AX.89681093 | 7.40E+08 | 0.25 | -3.68 | 5.51 | 0.09 |

|    |     |    |             |          |      |       |      |      |
|----|-----|----|-------------|----------|------|-------|------|------|
| E1 | GY  | 4A | AX.89685609 | 7.20E+08 | 0.17 | -3.02 | 3.10 | 0.05 |
| E1 | GPS | 4A | AX.89326485 | 7.27E+08 | 0.15 | -1.62 | 3.36 | 0.06 |
| E1 | GY  | 4A | AX.89775360 | 7.33E+08 | 0.19 | -2.99 | 3.25 | 0.05 |
| E1 | GY  | 4A | AX.89661917 | 7.19E+08 | 0.23 | -2.73 | 3.16 | 0.05 |
| E1 | GY  | 4A | AX.89354777 | 7.26E+08 | 0.09 | -3.98 | 3.16 | 0.05 |
| E1 | GY  | 4A | AX.89628286 | 7.20E+08 | 0.18 | -3.05 | 3.20 | 0.06 |
| E1 | GY  | 4A | AX.89678810 | 7.25E+08 | 0.20 | -2.98 | 3.40 | 0.05 |
| E1 | GY  | 4A | AX.89321874 | 7.26E+08 | 0.08 | -4.16 | 3.15 | 0.05 |
| E1 | GY  | 4A | AX.89355306 | 7.41E+08 | 0.34 | -3.80 | 6.90 | 0.11 |
| E1 | GY  | 4A | AX.89355306 | 7.41E+08 | 0.34 | -3.80 | 6.90 | 0.11 |
| E1 | GY  | 4A | AX.89554375 | 7.27E+08 | 0.23 | -3.49 | 4.78 | 0.08 |
| E1 | GY  | 4A | AX.89624256 | 7.44E+08 | 0.20 | -3.20 | 3.77 | 0.06 |
| E1 | GY  | 4A | AX.89707063 | 7.39E+08 | 0.16 | -3.67 | 4.16 | 0.07 |
| E1 | GY  | 4A | AX.89637772 | 7.21E+08 | 0.17 | -3.14 | 3.25 | 0.06 |
| E1 | GY  | 4A | AX.89600590 | 7.27E+08 | 0.16 | -3.28 | 3.37 | 0.05 |
| E1 | GY  | 4A | AX.89600590 | 7.27E+08 | 0.16 | -3.28 | 3.37 | 0.05 |
| E1 | GY  | 4A | AX.89573514 | 7.34E+08 | 0.07 | -4.45 | 3.06 | 0.05 |
| E1 | GY  | 4A | AX.89687921 | 7.25E+08 | 0.16 | -3.47 | 3.70 | 0.06 |
| E1 | GY  | 4A | AX.89687921 | 7.25E+08 | 0.16 | -3.47 | 3.70 | 0.06 |
| E1 | GY  | 4A | AX.89708349 | 7.31E+08 | 0.17 | -3.41 | 3.82 | 0.06 |
| E1 | GY  | 4A | AX.89566817 | 7.26E+08 | 0.18 | -3.14 | 3.36 | 0.05 |
| E1 | GY  | 4A | AX.89322782 | 7.24E+08 | 0.12 | -3.61 | 3.26 | 0.05 |
| E1 | GY  | 4A | AX.89767812 | 7.31E+08 | 0.27 | -3.65 | 5.66 | 0.09 |
| E1 | GY  | 4A | AX.89767812 | 7.31E+08 | 0.27 | -3.65 | 5.66 | 0.09 |
| E1 | GY  | 4A | AX.89322806 | 7.39E+08 | 0.13 | -3.42 | 3.15 | 0.05 |
| E1 | GY  | 4A | AX.89642948 | 7.41E+08 | 0.35 | -3.41 | 5.77 | 0.09 |
| E1 | GY  | 4A | AX.89723261 | 7.33E+08 | 0.17 | -3.49 | 3.89 | 0.06 |
| E1 | GY  | 4A | AX.89659280 | 7.39E+08 | 0.16 | -3.67 | 4.16 | 0.07 |
| E1 | GY  | 4A | AX.89659280 | 7.39E+08 | 0.16 | -3.67 | 4.16 | 0.07 |
| E1 | GY  | 4A | AX.89543701 | 6.61E+08 | 0.10 | -3.77 | 3.10 | 0.05 |
| E1 | GY  | 4A | AX.89431866 | 7.34E+08 | 0.22 | -2.82 | 3.22 | 0.05 |
| E1 | GY  | 4A | AX.89431866 | 7.34E+08 | 0.22 | -2.82 | 3.22 | 0.05 |
| E1 | GY  | 4A | AX.89611606 | 4.10E+07 | 0.11 | -3.73 | 3.15 | 0.05 |
| E1 | GY  | 4A | AX.89392325 | 7.24E+08 | 0.12 | -3.61 | 3.26 | 0.05 |
| E1 | GY  | 4A | AX.89432804 | 7.25E+08 | 0.13 | -4.07 | 4.12 | 0.06 |
| E1 | GY  | 4A | AX.89604647 | 7.22E+08 | 0.20 | -3.54 | 4.50 | 0.08 |
| E1 | GY  | 4A | AX.89498509 | 7.26E+08 | 0.18 | -3.29 | 3.71 | 0.06 |
| E1 | GY  | 4A | AX.89677918 | 7.28E+08 | 0.27 | -3.70 | 5.84 | 0.09 |
| E1 | GY  | 4A | AX.89572745 | 7.27E+08 | 0.13 | -3.56 | 3.28 | 0.05 |
| E1 | GY  | 4A | AX.89572745 | 7.27E+08 | 0.13 | -3.56 | 3.28 | 0.05 |
| E1 | GY  | 4A | AX.89358742 | 7.10E+08 | 0.14 | -3.24 | 3.08 | 0.05 |
| E1 | GY  | 4A | AX.89739556 | 4.10E+07 | 0.11 | -3.73 | 3.15 | 0.05 |
| E1 | GY  | 4A | AX.89499679 | 7.26E+08 | 0.17 | -3.23 | 3.41 | 0.05 |
| E1 | GY  | 4A | AX.89629079 | 7.28E+08 | 0.20 | -3.09 | 3.55 | 0.05 |
| E1 | GY  | 4A | AX.89716456 | 7.29E+08 | 0.22 | -3.44 | 4.58 | 0.07 |
| E1 | GY  | 4A | AX.89629721 | 7.41E+08 | 0.27 | -3.65 | 5.65 | 0.09 |
| E1 | GY  | 4A | AX.89569986 | 7.24E+08 | 0.12 | -3.61 | 3.26 | 0.05 |
| E1 | GY  | 4A | AX.89752209 | 7.24E+08 | 0.12 | -3.61 | 3.26 | 0.05 |
| E1 | GY  | 4A | AX.89582475 | 7.40E+08 | 0.17 | -3.58 | 4.06 | 0.06 |
| E1 | GY  | 4A | AX.89753010 | 7.05E+08 | 0.16 | -3.16 | 3.15 | 0.06 |

|    |      |    |             |          |      |          |      |      |
|----|------|----|-------------|----------|------|----------|------|------|
| E1 | GY   | 4A | AX.89705660 | 7.40E+08 | 0.48 | -2.54    | 3.72 | 0.06 |
| E1 | GY   | 4A | AX.89537546 | 7.31E+08 | 0.16 | -3.11    | 3.06 | 0.05 |
| E1 | GY   | 4A | AX.89763075 | 7.26E+08 | 0.18 | -3.29    | 3.71 | 0.06 |
| E1 | GY   | 4A | AX.89433453 | 7.41E+08 | 0.23 | -3.46    | 4.75 | 0.07 |
| E1 | GY   | 4A | AX.89572712 | 4.05E+07 | 0.11 | -3.73    | 3.15 | 0.05 |
| E1 | GY   | 4A | AX.89572712 | 4.05E+07 | 0.11 | -3.73    | 3.15 | 0.05 |
| E1 | GY   | 4A | AX.89545628 | 7.24E+08 | 0.12 | -3.61    | 3.26 | 0.05 |
| E1 | GY   | 4A | AX.89503631 | 7.28E+08 | 0.14 | -3.41    | 3.29 | 0.05 |
| E1 | GY   | 4A | AX.89503631 | 7.28E+08 | 0.14 | -3.41    | 3.29 | 0.05 |
| E1 | GY   | 4A | AX.89328298 | 7.31E+08 | 0.19 | -4.41    | 6.45 | 0.11 |
| E1 | GY   | 4A | AX.89707039 | 7.27E+08 | 0.15 | -3.21    | 3.10 | 0.05 |
| E1 | GY   | 4A | AX.89362942 | 7.26E+08 | 0.23 | -3.14    | 4.02 | 0.06 |
| E1 | GY   | 4A | AX.89328354 | 7.39E+08 | 0.16 | -3.90    | 4.55 | 0.07 |
| E1 | GY   | 4A | AX.89468094 | 7.41E+08 | 0.24 | -3.39    | 4.71 | 0.07 |
| E1 | GY   | 4A | AX.89328721 | 7.39E+08 | 0.16 | -3.67    | 4.16 | 0.07 |
| E1 | GY   | 4A | AX.89482485 | 7.24E+08 | 0.12 | -4.03    | 3.83 | 0.06 |
| E1 | GY   | 4A | AX.89759750 | 7.22E+08 | 0.16 | -3.31    | 3.48 | 0.06 |
| E1 | GY   | 4A | AX.89329174 | 7.22E+08 | 0.18 | -3.24    | 3.54 | 0.06 |
| E1 | GY   | 4A | AX.89329174 | 7.22E+08 | 0.18 | -3.24    | 3.54 | 0.06 |
| E1 | GY   | 4A | AX.89755912 | 7.33E+08 | 0.14 | -3.62    | 3.64 | 0.06 |
| E1 | GY   | 4A | AX.89318590 | 7.24E+08 | 0.11 | -3.67    | 3.07 | 0.05 |
| E1 | GY   | 4A | AX.89517532 | 7.24E+08 | 0.12 | -3.61    | 3.26 | 0.05 |
| E1 | GY   | 4A | AX.89400490 | 7.24E+08 | 0.06 | -5.45    | 3.63 | 0.06 |
| E1 | GY   | 4A | AX.89486705 | 7.27E+08 | 0.23 | -3.52    | 4.85 | 0.08 |
| E1 | GY   | 4A | AX.89469231 | 7.30E+08 | 0.20 | -2.88    | 3.19 | 0.05 |
| E1 | GY   | 4A | AX.89457592 | 7.26E+08 | 0.24 | -3.39    | 4.64 | 0.07 |
| E1 | GY   | 4A | AX.89364766 | 7.26E+08 | 0.24 | -2.96    | 3.67 | 0.05 |
| E1 | GY   | 4A | AX.89630821 | 7.24E+08 | 0.12 | -3.61    | 3.26 | 0.05 |
| E1 | GY   | 4A | AX.89559764 | 7.22E+08 | 0.17 | -3.14    | 3.25 | 0.06 |
| E1 | GY   | 4A | AX.89423999 | 7.24E+08 | 0.06 | -5.48    | 3.66 | 0.06 |
| E1 | GY   | 4A | AX.89423999 | 7.24E+08 | 0.06 | -5.48    | 3.66 | 0.06 |
| E1 | GY   | 4A | AX.89506180 | 7.37E+08 | 0.10 | -3.91    | 3.31 | 0.05 |
| E1 | GY   | 4A | AX.89588174 | 7.34E+08 | 0.21 | -3.02    | 3.56 | 0.05 |
| E1 | GY   | 4A | AX.89330690 | 7.34E+08 | 0.21 | -2.83    | 3.20 | 0.05 |
| E1 | GY   | 4A | AX.89710159 | 7.24E+08 | 0.07 | -5.27    | 4.32 | 0.07 |
| E1 | GPM2 | 4A | AX.89677538 | 4.06E+07 | 0.10 | -1141.22 | 3.98 | 0.07 |
| E1 | GY   | 4A | AX.89684945 | 6.64E+08 | 0.20 | -3.08    | 3.58 | 0.05 |
| E1 | GY   | 4A | AX.89775815 | 7.24E+08 | 0.07 | -5.67    | 4.40 | 0.07 |
| E1 | GY   | 4A | AX.89712135 | 7.25E+08 | 0.06 | -5.45    | 3.63 | 0.06 |
| E1 | GY   | 4A | AX.89367604 | 7.25E+08 | 0.18 | -3.29    | 3.71 | 0.06 |
| E1 | GPM2 | 4A | AX.89484604 | 7.40E+08 | 0.26 | -679.49  | 3.16 | 0.05 |
| E1 | GY   | 4A | AX.89497176 | 7.40E+08 | 0.33 | -3.53    | 5.99 | 0.10 |
| E1 | GY   | 4A | AX.89333240 | 7.26E+08 | 0.18 | -3.29    | 3.71 | 0.06 |
| E1 | GY   | 4A | AX.89723261 | 7.33E+08 | 0.17 | -3.49    | 3.89 | 0.06 |
| E1 | GY   | 4A | AX.89651575 | 7.24E+08 | 0.07 | -5.67    | 4.40 | 0.07 |
| E1 | GY   | 4A | AX.89672155 | 7.37E+08 | 0.14 | -3.43    | 3.40 | 0.05 |
| E1 | GY   | 4A | AX.89725490 | 7.40E+08 | 0.30 | -2.98    | 4.20 | 0.06 |
| E1 | GY   | 4A | AX.89369037 | 7.34E+08 | 0.13 | -3.78    | 3.63 | 0.06 |
| E1 | GY   | 4A | AX.89611606 | 4.10E+07 | 0.11 | -3.73    | 3.15 | 0.05 |
| E1 | GY   | 4A | AX.89474035 | 7.26E+08 | 0.13 | -3.96    | 4.16 | 0.07 |

|    |      |    |             |          |      |          |      |      |
|----|------|----|-------------|----------|------|----------|------|------|
| E1 | GY   | 4A | AX.89631080 | 7.25E+08 | 0.11 | -3.78    | 3.33 | 0.05 |
| E1 | GY   | 4A | AX.89631080 | 7.25E+08 | 0.11 | -3.78    | 3.33 | 0.05 |
| E1 | GY   | 4A | AX.89775352 | 7.41E+08 | 0.24 | -3.39    | 4.71 | 0.07 |
| E1 | GY   | 4A | AX.89462343 | 7.27E+08 | 0.27 | -3.70    | 5.84 | 0.09 |
| E1 | GY   | 4A | AX.89537376 | 7.24E+08 | 0.07 | -4.93    | 3.65 | 0.06 |
| E1 | GY   | 4A | AX.89579752 | 7.43E+08 | 0.20 | -3.05    | 3.42 | 0.05 |
| E1 | GY   | 4A | AX.89545470 | 7.16E+08 | 0.19 | -3.98    | 5.36 | 0.09 |
| E1 | GY   | 4A | AX.89690364 | 7.40E+08 | 0.36 | -3.26    | 5.34 | 0.08 |
| E1 | GPM2 | 4A | AX.89469366 | 4.04E+07 | 0.10 | -1141.22 | 3.98 | 0.07 |
| E1 | GPM2 | 4A | AX.89448965 | 4.19E+07 | 0.10 | -949.30  | 3.01 | 0.05 |
| E1 | GY   | 4A | AX.89654418 | 7.24E+08 | 0.12 | -3.97    | 3.74 | 0.06 |
| E1 | GPM2 | 4A | AX.89612127 | 4.11E+07 | 0.11 | -1001.42 | 3.40 | 0.05 |
| E1 | GPM2 | 4A | AX.89743266 | 4.09E+07 | 0.11 | -1001.42 | 3.40 | 0.05 |
| E1 | GY   | 4A | AX.89680337 | 7.20E+08 | 0.22 | -2.85    | 3.31 | 0.06 |
| E1 | GY   | 4A | AX.89752209 | 7.24E+08 | 0.12 | -3.61    | 3.26 | 0.05 |
| E1 | GY   | 4A | AX.89382815 | 7.25E+08 | 0.09 | -4.90    | 4.37 | 0.07 |
| E1 | GY   | 4A | AX.89442700 | 7.26E+08 | 0.18 | -3.29    | 3.71 | 0.06 |
| E1 | GY   | 4A | AX.89638028 | 7.25E+08 | 0.14 | -3.69    | 3.77 | 0.06 |
| E1 | GY   | 4A | AX.89570705 | 7.31E+08 | 0.19 | -3.04    | 3.35 | 0.05 |
| E1 | GY   | 4A | AX.89692841 | 7.29E+08 | 0.22 | -3.44    | 4.58 | 0.07 |
| E1 | GY   | 4A | AX.89692841 | 7.29E+08 | 0.22 | -3.44    | 4.58 | 0.07 |
| E1 | GY   | 4A | AX.89395851 | 7.36E+08 | 0.14 | -3.43    | 3.40 | 0.05 |
| E1 | GPM2 | 4A | AX.89600383 | 4.09E+07 | 0.11 | -1001.42 | 3.40 | 0.05 |
| E1 | GY   | 4A | AX.89432068 | 7.40E+08 | 0.20 | -3.24    | 3.86 | 0.06 |
| E1 | GPM2 | 4A | AX.89600862 | 6.04E+08 | 0.32 | 626.11   | 3.09 | 0.05 |
| E1 | GY   | 4A | AX.89537632 | 7.22E+08 | 0.21 | -3.06    | 3.64 | 0.06 |
| E1 | GY   | 4A | AX.89591500 | 7.27E+08 | 0.18 | -4.23    | 5.68 | 0.09 |
| E1 | GY   | 4A | AX.89591500 | 7.27E+08 | 0.18 | -4.23    | 5.68 | 0.09 |
| E1 | GY   | 4A | AX.89444767 | 7.26E+08 | 0.24 | -3.38    | 4.68 | 0.07 |
| E1 | GY   | 4A | AX.89503068 | 7.27E+08 | 0.15 | -3.58    | 3.74 | 0.06 |
| E1 | GY   | 4A | AX.89767319 | 7.24E+08 | 0.06 | -5.17    | 3.53 | 0.06 |
| E1 | GPM2 | 4A | AX.89431718 | 7.31E+08 | 0.14 | -850.46  | 3.20 | 0.05 |
| E1 | GY   | 4A | AX.89445272 | 7.22E+08 | 0.22 | -2.89    | 3.35 | 0.06 |
| E1 | GPM2 | 4A | AX.89611606 | 4.10E+07 | 0.11 | -1001.42 | 3.40 | 0.05 |
| E1 | GY   | 4A | AX.89467705 | 7.34E+08 | 0.19 | -3.71    | 4.66 | 0.07 |
| E1 | GY   | 4A | AX.89695704 | 7.21E+08 | 0.07 | -4.97    | 3.89 | 0.06 |
| E1 | GY   | 4A | AX.89695704 | 7.21E+08 | 0.07 | -4.97    | 3.89 | 0.06 |
| E1 | GY   | 4A | AX.89755246 | 7.27E+08 | 0.12 | -3.57    | 3.20 | 0.05 |
| E1 | GY   | 4A | AX.89755246 | 7.27E+08 | 0.12 | -3.57    | 3.20 | 0.05 |
| E1 | GPM2 | 4A | AX.89580470 | 4.05E+07 | 0.10 | -1141.22 | 3.98 | 0.07 |
| E1 | GY   | 4A | AX.89411387 | 7.39E+08 | 0.15 | -3.29    | 3.24 | 0.05 |
| E1 | GY   | 4A | AX.89610369 | 7.30E+08 | 0.17 | -3.80    | 4.60 | 0.07 |
| E1 | GY   | 4A | AX.89482485 | 7.24E+08 | 0.12 | -4.03    | 3.83 | 0.06 |
| E1 | GY   | 4A | AX.89760946 | 7.38E+08 | 0.14 | -3.31    | 3.20 | 0.05 |
| E1 | GY   | 4A | AX.89445680 | 7.31E+08 | 0.23 | -3.78    | 5.58 | 0.09 |
| E1 | GY   | 4A | AX.89364766 | 7.26E+08 | 0.24 | -2.96    | 3.67 | 0.05 |
| E1 | GY   | 4A | AX.86164644 | 7.22E+08 | 0.22 | -2.70    | 3.02 | 0.05 |
| E1 | GY   | 4A | AX.86164644 | 7.22E+08 | 0.22 | -2.70    | 3.02 | 0.05 |
| E1 | GY   | 4A | AX.89559764 | 7.22E+08 | 0.17 | -3.14    | 3.25 | 0.06 |
| E1 | GY   | 4A | AX.89505951 | 7.26E+08 | 0.18 | -3.29    | 3.71 | 0.06 |

|    |      |    |             |          |      |          |      |      |
|----|------|----|-------------|----------|------|----------|------|------|
| E1 | GPM2 | 4A | AX.89312465 | 4.05E+07 | 0.10 | -1141.22 | 3.98 | 0.07 |
| E1 | GY   | 4A | AX.89486698 | 7.42E+07 | 0.07 | -4.73    | 3.22 | 0.05 |
| E1 | GY   | 4A | AX.89486698 | 7.42E+07 | 0.07 | -4.73    | 3.22 | 0.05 |
| E1 | GY   | 4A | AX.89548890 | 7.25E+08 | 0.11 | -4.13    | 3.87 | 0.06 |
| E1 | GPM2 | 4A | AX.89509690 | 4.32E+07 | 0.09 | -1091.74 | 3.55 | 0.06 |
| E1 | GY   | 4A | AX.89530946 | 7.22E+08 | 0.22 | -2.75    | 3.11 | 0.05 |
| E1 | GY   | 4A | AX.89561531 | 6.61E+08 | 0.10 | -3.77    | 3.10 | 0.05 |
| E1 | GY   | 4A | AX.89609481 | 7.30E+08 | 0.20 | -3.35    | 4.09 | 0.06 |
| E1 | GY   | 4A | AX.89764094 | 7.24E+08 | 0.12 | -3.61    | 3.26 | 0.05 |
| E1 | GY   | 4A | AX.89661835 | 7.33E+08 | 0.11 | -3.63    | 3.02 | 0.04 |
| E1 | GY   | 4A | AX.89731769 | 7.27E+08 | 0.22 | -3.52    | 4.72 | 0.07 |
| E1 | GY   | 4A | AX.89760308 | 7.21E+08 | 0.17 | -3.14    | 3.25 | 0.06 |
| E1 | GY   | 4A | AX.89625179 | 7.22E+08 | 0.17 | -3.14    | 3.25 | 0.06 |
| E1 | GY   | 4A | AX.89625179 | 7.22E+08 | 0.17 | -3.14    | 3.25 | 0.06 |
| E1 | GPS  | 4A | AX.89412597 | 7.27E+08 | 0.13 | -1.63    | 3.03 | 0.05 |
| E1 | GY   | 4A | AX.89727201 | 7.22E+08 | 0.22 | -2.77    | 3.16 | 0.05 |
| E1 | GPM2 | 4A | AX.89371505 | 4.04E+07 | 0.10 | -1141.22 | 3.98 | 0.07 |
| E1 | GY   | 4A | AX.89663245 | 7.19E+08 | 0.17 | -3.14    | 3.25 | 0.06 |
| E1 | GY   | 4A | AX.89683437 | 7.33E+08 | 0.13 | -3.67    | 3.64 | 0.06 |
| E1 | GY   | 4A | AX.89683437 | 7.33E+08 | 0.13 | -3.67    | 3.64 | 0.06 |
| E1 | GY   | 4A | AX.89642948 | 7.41E+08 | 0.35 | -3.41    | 5.77 | 0.09 |
| E1 | GY   | 4A | AX.89632750 | 7.41E+08 | 0.23 | -3.46    | 4.76 | 0.07 |
| E1 | GPM2 | 4A | AX.89396292 | 4.05E+07 | 0.10 | -1141.22 | 3.98 | 0.07 |
| E1 | GY   | 4A | AX.89598535 | 7.26E+08 | 0.15 | -3.65    | 3.88 | 0.06 |
| E1 | GPM2 | 4A | AX.89544271 | 4.09E+07 | 0.11 | -1001.42 | 3.40 | 0.05 |
| E1 | GPM2 | 4A | AX.89568216 | 4.19E+07 | 0.09 | -1091.74 | 3.55 | 0.06 |
| E1 | GY   | 4A | AX.89474564 | 7.26E+08 | 0.11 | -4.82    | 5.09 | 0.08 |
| E1 | GY   | 4A | AX.89726325 | 7.29E+08 | 0.15 | -3.40    | 3.42 | 0.05 |
| E1 | GPM2 | 4A | AX.89666039 | 4.04E+07 | 0.10 | -1014.16 | 3.36 | 0.05 |
| E1 | GY   | 4A | AX.89760389 | 7.40E+08 | 0.12 | -4.27    | 4.24 | 0.07 |
| E1 | GY   | 4A | AX.89760389 | 7.40E+08 | 0.12 | -4.27    | 4.24 | 0.07 |
| E1 | GY   | 4A | AX.89737070 | 7.09E+08 | 0.15 | -3.47    | 3.62 | 0.06 |
| E1 | GY   | 4A | AX.89737070 | 7.09E+08 | 0.15 | -3.47    | 3.62 | 0.06 |
| E1 | GPM2 | 4A | AX.89562467 | 4.09E+07 | 0.11 | -1001.42 | 3.40 | 0.05 |
| E1 | GPM2 | 4A | AX.89748168 | 4.09E+07 | 0.10 | -1141.22 | 3.98 | 0.07 |
| E1 | GPM2 | 4A | AX.89458101 | 4.09E+07 | 0.10 | -1141.22 | 3.98 | 0.07 |
| E1 | GY   | 4A | AX.89715796 | 7.04E+08 | 0.16 | -3.16    | 3.15 | 0.06 |
| E1 | GY   | 4A | AX.89381828 | 7.32E+08 | 0.27 | -3.43    | 5.05 | 0.08 |
| E1 | GY   | 4A | AX.89557779 | 7.30E+08 | 0.15 | -3.47    | 3.55 | 0.05 |
| E1 | GPM2 | 4A | AX.89564666 | 4.09E+07 | 0.10 | -1141.22 | 3.98 | 0.07 |
| E1 | GY   | 4A | AX.89418224 | 7.24E+08 | 0.11 | -4.10    | 3.82 | 0.06 |
| E1 | GY   | 4A | AX.89546685 | 7.39E+08 | 0.18 | -3.24    | 3.62 | 0.05 |
| E1 | GY   | 4A | AX.89692225 | 7.33E+08 | 0.19 | -3.40    | 4.06 | 0.06 |
| E1 | GY   | 4A | AX.89692225 | 7.33E+08 | 0.19 | -3.40    | 4.06 | 0.06 |
| E1 | GY   | 4A | AX.89663455 | 7.22E+08 | 0.17 | -3.27    | 3.55 | 0.06 |
| E1 | GPM2 | 4A | AX.89745300 | 4.19E+07 | 0.10 | -1141.22 | 3.98 | 0.07 |
| E1 | GY   | 4A | AX.89741478 | 7.28E+08 | 0.13 | -3.56    | 3.28 | 0.05 |
| E1 | GPM2 | 4A | AX.89608513 | 3.28E+08 | 0.11 | -991.09  | 3.45 | 0.05 |
| E1 | GPM2 | 4A | AX.89640472 | 1.73E+07 | 0.08 | -1105.70 | 3.20 | 0.06 |
| E1 | GPM2 | 4A | AX.89421899 | 4.19E+07 | 0.09 | -1091.74 | 3.55 | 0.06 |

|    |      |    |             |          |      |          |      |      |
|----|------|----|-------------|----------|------|----------|------|------|
| E1 | GY   | 4A | AX.89479076 | 6.07E+07 | 0.11 | -3.65    | 3.03 | 0.05 |
| E1 | GPM2 | 4A | AX.89572712 | 4.05E+07 | 0.11 | -1001.42 | 3.40 | 0.05 |
| E1 | GY   | 4A | AX.89492022 | 7.30E+08 | 0.20 | -3.47    | 4.41 | 0.07 |
| E1 | GPM2 | 4A | AX.89564368 | 4.19E+07 | 0.10 | -949.30  | 3.01 | 0.05 |
| E1 | GY   | 4A | AX.89612127 | 4.11E+07 | 0.11 | -3.73    | 3.15 | 0.05 |
| E1 | GY   | 4A | AX.89650128 | 7.20E+08 | 0.22 | -2.75    | 3.11 | 0.05 |
| E1 | GY   | 4A | AX.89650128 | 7.20E+08 | 0.22 | -2.75    | 3.11 | 0.05 |
| E1 | GY   | 4A | AX.89492910 | 7.41E+08 | 0.24 | -3.29    | 4.42 | 0.07 |
| E1 | GY   | 4A | AX.89492910 | 7.41E+08 | 0.24 | -3.29    | 4.42 | 0.07 |
| E1 | GY   | 4A | AX.89750215 | 7.31E+08 | 0.20 | -3.97    | 5.60 | 0.09 |
| E1 | GY   | 4A | AX.89750215 | 7.31E+08 | 0.20 | -3.97    | 5.60 | 0.09 |
| E1 | GY   | 4A | AX.89563022 | 7.33E+08 | 0.22 | -3.03    | 3.67 | 0.06 |
| E1 | GY   | 4A | AX.89529222 | 7.26E+08 | 0.24 | -3.21    | 4.26 | 0.07 |
| E1 | GPM2 | 4A | AX.89688644 | 4.04E+07 | 0.10 | -1141.22 | 3.98 | 0.07 |
| E1 | GY   | 4A | AX.89692684 | 7.27E+08 | 0.08 | -4.55    | 3.52 | 0.05 |
| E1 | GY   | 4A | AX.89692684 | 7.27E+08 | 0.08 | -4.55    | 3.52 | 0.05 |
| E1 | GY   | 4A | AX.89571325 | 7.40E+08 | 0.26 | -3.40    | 4.93 | 0.08 |
| E1 | GY   | 4A | AX.89536634 | 7.31E+08 | 0.15 | -4.19    | 4.92 | 0.08 |
| E1 | GY   | 4A | AX.89707143 | 7.40E+08 | 0.25 | -3.68    | 5.55 | 0.09 |
| E1 | GY   | 4A | AX.89685609 | 7.20E+08 | 0.17 | -3.02    | 3.10 | 0.05 |
| E1 | GY   | 4A | AX.89491600 | 7.20E+08 | 0.21 | -2.73    | 3.00 | 0.05 |
| E1 | GY   | 4A | AX.89565646 | 7.43E+08 | 0.21 | -3.25    | 4.00 | 0.06 |
| E1 | GY   | 4A | AX.89577216 | 7.06E+08 | 0.16 | -3.16    | 3.15 | 0.06 |
| E1 | GY   | 4A | AX.89636971 | 4.04E+07 | 0.11 | -3.73    | 3.15 | 0.05 |
| E1 | GY   | 4A | AX.89576737 | 7.34E+08 | 0.21 | -3.02    | 3.56 | 0.05 |
| E1 | GPM2 | 4A | AX.89739538 | 4.04E+07 | 0.11 | -1001.42 | 3.40 | 0.05 |
| E1 | GPM2 | 4A | AX.89343528 | 1.76E+07 | 0.27 | 767.59   | 3.98 | 0.07 |
| E1 | GY   | 4A | AX.89628286 | 7.20E+08 | 0.18 | -3.05    | 3.20 | 0.06 |
| E1 | GY   | 4A | AX.89542047 | 7.24E+08 | 0.12 | -3.61    | 3.26 | 0.05 |
| E1 | GY   | 4A | AX.89566336 | 7.27E+08 | 0.16 | -4.09    | 4.93 | 0.08 |
| E1 | GY   | 4A | AX.89624256 | 7.44E+08 | 0.20 | -3.20    | 3.77 | 0.06 |
| E1 | GY   | 4A | AX.89573514 | 7.34E+08 | 0.07 | -4.45    | 3.06 | 0.05 |
| E1 | GY   | 4A | AX.89566817 | 7.26E+08 | 0.18 | -3.14    | 3.36 | 0.05 |
| E1 | GY   | 4A | AX.89322782 | 7.24E+08 | 0.12 | -3.61    | 3.26 | 0.05 |
| E1 | GY   | 4A | AX.89432804 | 7.25E+08 | 0.13 | -4.07    | 4.12 | 0.06 |
| E1 | GY   | 4A | AX.89726883 | 7.41E+08 | 0.24 | -3.40    | 4.67 | 0.07 |
| E1 | GY   | 4A | AX.89534158 | 7.31E+08 | 0.15 | -3.18    | 3.05 | 0.04 |
| E1 | GY   | 4A | AX.89443687 | 7.27E+08 | 0.07 | -4.41    | 3.02 | 0.05 |
| E1 | GY   | 4A | AX.89430756 | 7.24E+08 | 0.06 | -5.45    | 3.63 | 0.06 |
| E1 | GY   | 4A | AX.89760720 | 1.76E+07 | 0.27 | 3.06     | 4.19 | 0.08 |
| E1 | GY   | 4A | AX.89515035 | 7.28E+08 | 0.26 | -2.70    | 3.27 | 0.05 |
| E1 | GY   | 4A | AX.89640400 | 7.27E+08 | 0.13 | -3.64    | 3.50 | 0.05 |
| E1 | GY   | 4A | AX.89645053 | 7.24E+08 | 0.08 | -4.22    | 3.22 | 0.05 |
| E1 | GY   | 4A | AX.89362942 | 7.26E+08 | 0.23 | -3.14    | 4.02 | 0.06 |
| E1 | GY   | 4A | AX.89434141 | 7.22E+08 | 0.22 | -2.94    | 3.44 | 0.06 |
| E1 | GY   | 4A | AX.89634490 | 4.04E+07 | 0.11 | -3.73    | 3.15 | 0.05 |
| E1 | GY   | 4A | AX.89634490 | 4.04E+07 | 0.11 | -3.73    | 3.15 | 0.05 |
| E1 | GY   | 4A | AX.89517532 | 7.24E+08 | 0.12 | -3.61    | 3.26 | 0.05 |
| E1 | GY   | 4A | AX.89556447 | 7.39E+08 | 0.15 | -3.46    | 3.52 | 0.05 |
| E1 | GPM2 | 4A | AX.89634490 | 4.04E+07 | 0.11 | -1001.42 | 3.40 | 0.05 |

|    |      |    |             |          |      |          |      |      |
|----|------|----|-------------|----------|------|----------|------|------|
| E1 | GPM2 | 4A | AX.89548225 | 4.19E+07 | 0.09 | -1091.74 | 3.55 | 0.06 |
| E1 | GY   | 4A | AX.89637968 | 7.41E+08 | 0.35 | -3.26    | 5.32 | 0.08 |
| E1 | GY   | 4A | AX.89497176 | 7.40E+08 | 0.33 | -3.53    | 5.99 | 0.10 |
| E1 | GY   | 4A | AX.89497230 | 7.21E+08 | 0.22 | -2.77    | 3.16 | 0.05 |
| E1 | GY   | 4A | AX.89543701 | 6.61E+08 | 0.10 | -3.77    | 3.10 | 0.05 |
| E1 | GY   | 4A | AX.89664021 | 7.25E+08 | 0.12 | -3.61    | 3.26 | 0.05 |
| E1 | GY   | 4A | AX.89474035 | 7.26E+08 | 0.13 | -3.96    | 4.16 | 0.07 |
| E1 | GY   | 4A | AX.89333861 | 7.26E+08 | 0.18 | -3.29    | 3.71 | 0.06 |
| E1 | GPM2 | 4A | AX.89309778 | 4.04E+07 | 0.10 | -1141.22 | 3.98 | 0.07 |
| E1 | GPM2 | 4A | AX.89647014 | 4.05E+07 | 0.10 | -1141.22 | 3.98 | 0.07 |
| E1 | GY   | 4A | AX.89568764 | 7.43E+08 | 0.20 | -3.31    | 4.06 | 0.06 |
| E1 | GPM2 | 4A | AX.89672103 | 6.02E+08 | 0.21 | -715.71  | 3.07 | 0.05 |
| E1 | GY   | 4A | AX.89512247 | 7.24E+08 | 0.12 | -3.61    | 3.26 | 0.05 |
| E1 | GPM2 | 4A | AX.89334772 | 4.09E+07 | 0.11 | -1001.42 | 3.40 | 0.05 |
| E1 | GY   | 4A | AX.89477455 | 7.22E+08 | 0.22 | -2.77    | 3.16 | 0.05 |
| E1 | GY   | 4A | AX.89570705 | 7.31E+08 | 0.19 | -3.04    | 3.35 | 0.05 |
| E1 | GY   | 4A | AX.89635496 | 7.40E+08 | 0.17 | -3.02    | 3.09 | 0.05 |
| E1 | GY   | 4A | AX.89444767 | 7.26E+08 | 0.24 | -3.38    | 4.68 | 0.07 |
| E1 | GPM2 | 4A | AX.89521160 | 2.03E+08 | 0.11 | -991.09  | 3.45 | 0.05 |
| E1 | GY   | 4A | AX.89729945 | 7.34E+08 | 0.12 | -3.55    | 3.08 | 0.05 |
| E1 | GPM2 | 4A | AX.89415139 | 4.11E+07 | 0.10 | -1141.22 | 3.98 | 0.07 |
| E1 | GY   | 4A | AX.89662356 | 7.26E+08 | 0.24 | -2.96    | 3.67 | 0.05 |
| E1 | GY   | 4A | AX.89486310 | 7.33E+08 | 0.22 | -3.03    | 3.67 | 0.06 |
| E1 | GPM2 | 4A | AX.89373580 | 2.24E+08 | 0.11 | -991.09  | 3.45 | 0.05 |
| E1 | GY   | 4A | AX.89632750 | 7.41E+08 | 0.23 | -3.46    | 4.76 | 0.07 |
| E1 | GY   | 4A | AX.89474542 | 7.26E+08 | 0.24 | -3.21    | 4.26 | 0.07 |
| E1 | GY   | 4A | AX.89778290 | 7.24E+08 | 0.06 | -5.17    | 3.53 | 0.06 |
| E1 | GY   | 4A | AX.89778290 | 7.24E+08 | 0.06 | -5.17    | 3.53 | 0.06 |
| E1 | GPM2 | 4A | AX.89336177 | 4.06E+07 | 0.11 | -1001.42 | 3.40 | 0.05 |
| E1 | GPS  | 4A | AX.89420090 | 7.30E+08 | 0.16 | -1.51    | 3.12 | 0.05 |
| E1 | GPM2 | 4A | AX.89701606 | 4.09E+07 | 0.10 | -1141.22 | 3.98 | 0.07 |
| E1 | TKW  | 4A | AX.89740430 | 7.27E+08 | 0.14 | -1.30    | 3.49 | 0.06 |
| E1 | TKW  | 4A | AX.89706134 | 7.42E+08 | 0.36 | -0.91    | 3.29 | 0.05 |
| E1 | TKW  | 4A | AX.89714548 | 5.97E+08 | 0.48 | -0.85    | 3.12 | 0.05 |
| E1 | GPM2 | 4A | AX.89536695 | 4.19E+07 | 0.09 | -1091.74 | 3.55 | 0.06 |
| E1 | TKW  | 4A | AX.89351946 | 7.42E+08 | 0.10 | -1.37    | 3.00 | 0.05 |
| E1 | TKW  | 4A | AX.89637968 | 7.41E+08 | 0.35 | -0.95    | 3.51 | 0.06 |
| E1 | GY   | 4A | AX.89663455 | 7.22E+08 | 0.17 | -3.27    | 3.55 | 0.06 |
| E1 | GPM2 | 4A | AX.89372837 | 4.11E+07 | 0.10 | -1141.22 | 3.98 | 0.07 |
| E1 | TKW  | 4A | AX.89444767 | 7.26E+08 | 0.24 | -1.08    | 3.64 | 0.06 |
| E1 | TKW  | 4A | AX.89376728 | 7.27E+08 | 0.22 | -1.18    | 3.97 | 0.07 |
| E1 | TKW  | 4A | AX.89594656 | 7.27E+08 | 0.14 | -1.30    | 3.49 | 0.06 |
| E1 | TKW  | 4A | AX.89338338 | 7.43E+08 | 0.21 | -1.12    | 3.56 | 0.06 |
| E1 | GPM2 | 4A | AX.89715843 | 4.04E+07 | 0.10 | -1141.22 | 3.98 | 0.07 |
| E1 | TKW  | 4A | AX.89644184 | 7.33E+08 | 0.21 | -1.03    | 3.08 | 0.05 |
| E1 | TKW  | 4A | AX.89584410 | 7.31E+08 | 0.27 | -1.00    | 3.41 | 0.06 |
| E1 | TKW  | 4A | AX.89339840 | 7.33E+08 | 0.22 | -1.03    | 3.17 | 0.05 |
| E1 | TKW  | 4A | AX.89566817 | 7.26E+08 | 0.18 | -1.13    | 3.23 | 0.05 |
| E1 | GY   | 4A | AX.89612127 | 4.11E+07 | 0.11 | -3.73    | 3.15 | 0.05 |
| E1 | TKW  | 4A | AX.89360038 | 7.33E+08 | 0.22 | -1.03    | 3.17 | 0.05 |

|    |      |    |             |          |      |          |      |      |
|----|------|----|-------------|----------|------|----------|------|------|
| E1 | TKW  | 4A | AX.89661925 | 6.04E+08 | 0.39 | -0.94    | 3.58 | 0.06 |
| E1 | TKW  | 4A | AX.89517951 | 7.26E+08 | 0.20 | -1.04    | 3.01 | 0.05 |
| E1 | TKW  | 4A | AX.89684381 | 7.40E+08 | 0.36 | -0.91    | 3.29 | 0.05 |
| E1 | TKW  | 4A | AX.89442700 | 7.26E+08 | 0.18 | -1.08    | 3.01 | 0.05 |
| E1 | GPM2 | 4A | AX.89614087 | 4.10E+07 | 0.11 | -1001.42 | 3.40 | 0.05 |
| E1 | GY   | 4A | AX.89318590 | 7.24E+08 | 0.11 | -3.67    | 3.07 | 0.05 |
| E1 | GY   | 4A | AX.89729045 | 7.33E+08 | 0.07 | -5.05    | 3.80 | 0.06 |
| E1 | GPM2 | 4A | AX.89739556 | 4.10E+07 | 0.11 | -1001.42 | 3.40 | 0.05 |
| E1 | GPM2 | 4A | AX.89617589 | 4.11E+07 | 0.11 | -1001.42 | 3.40 | 0.05 |
| E1 | GY   | 4A | AX.89446849 | 7.21E+08 | 0.22 | -2.94    | 3.44 | 0.06 |
| E1 | TKW  | 4A | AX.89642948 | 7.41E+08 | 0.35 | -0.87    | 3.04 | 0.05 |
| E1 | GY   | 4A | AX.89352927 | 7.20E+08 | 0.17 | -3.02    | 3.10 | 0.05 |
| E1 | TKW  | 4A | AX.89376272 | 7.26E+08 | 0.18 | -1.08    | 3.01 | 0.05 |
| E1 | TKW  | 4A | AX.89467077 | 7.42E+08 | 0.12 | -1.33    | 3.16 | 0.05 |
| E1 | TKW  | 4A | AX.89459794 | 7.40E+08 | 0.14 | -1.36    | 3.84 | 0.06 |
| E1 | GY   | 4A | AX.89719476 | 7.41E+08 | 0.27 | -3.44    | 5.19 | 0.08 |
| E1 | TKW  | 4A | AX.89317315 | 7.34E+08 | 0.14 | -1.47    | 4.31 | 0.07 |
| E1 | GPM2 | 4A | AX.89622027 | 4.10E+07 | 0.10 | -1141.22 | 3.98 | 0.07 |
| E1 | TKW  | 4A | AX.89426124 | 6.04E+08 | 0.43 | -0.89    | 3.32 | 0.06 |
| E1 | GPM2 | 4A | AX.89450482 | 4.11E+07 | 0.11 | -1001.42 | 3.40 | 0.05 |
| E1 | TKW  | 4A | AX.89310768 | 7.28E+08 | 0.21 | -1.07    | 3.30 | 0.05 |
| E1 | TKW  | 4A | AX.89333240 | 7.26E+08 | 0.18 | -1.08    | 3.01 | 0.05 |
| E1 | TKW  | 4A | AX.89395605 | 6.04E+08 | 0.43 | -0.90    | 3.44 | 0.06 |
| E1 | GPM2 | 4A | AX.89602523 | 6.04E+08 | 0.32 | 626.11   | 3.09 | 0.05 |
| E1 | TKW  | 4A | AX.89336009 | 7.40E+08 | 0.08 | -1.56    | 3.23 | 0.05 |
| E1 | GY   | 4A | AX.89678810 | 7.25E+08 | 0.20 | -2.98    | 3.40 | 0.05 |
| E1 | TKW  | 4A | AX.89446643 | 7.40E+08 | 0.36 | -0.91    | 3.29 | 0.05 |
| E1 | GPM2 | 4A | AX.89636971 | 4.04E+07 | 0.11 | -1001.42 | 3.40 | 0.05 |
| E1 | TKW  | 4A | AX.89674472 | 7.42E+08 | 0.10 | -1.37    | 3.00 | 0.05 |
| E1 | GPM2 | 4A | AX.89565275 | 4.09E+07 | 0.10 | -1141.22 | 3.98 | 0.07 |
| E1 | TKW  | 4A | AX.89387177 | 7.33E+08 | 0.20 | -1.14    | 3.60 | 0.06 |
| E1 | GY   | 4A | AX.89322806 | 7.39E+08 | 0.13 | -3.42    | 3.15 | 0.05 |
| E1 | TKW  | 4A | AX.89554375 | 7.27E+08 | 0.23 | -1.15    | 3.92 | 0.07 |
| E1 | TKW  | 4A | AX.89455084 | 7.31E+08 | 0.27 | -1.00    | 3.41 | 0.06 |
| E1 | TKW  | 4A | AX.89470934 | 7.33E+08 | 0.11 | -1.39    | 3.21 | 0.05 |
| E1 | GY   | 4A | AX.89776312 | 7.22E+08 | 0.21 | -3.06    | 3.64 | 0.06 |
| E1 | TKW  | 4A | AX.89469231 | 7.30E+08 | 0.20 | -1.04    | 3.06 | 0.05 |
| E1 | TKW  | 4A | AX.89686985 | 7.25E+08 | 0.18 | -1.08    | 3.01 | 0.05 |
| E1 | TKW  | 4A | AX.89560573 | 7.26E+08 | 0.21 | -1.16    | 3.76 | 0.06 |
| E1 | TKW  | 4A | AX.89349918 | 7.40E+08 | 0.18 | -1.42    | 4.78 | 0.08 |
| E1 | TKW  | 4A | AX.89763075 | 7.26E+08 | 0.18 | -1.08    | 3.01 | 0.05 |
| E1 | TKW  | 4A | AX.89342690 | 7.26E+08 | 0.20 | -1.04    | 3.01 | 0.05 |
| E1 | TKW  | 4A | AX.89561620 | 6.04E+08 | 0.39 | -0.94    | 3.58 | 0.06 |
| E1 | TKW  | 4A | AX.89476261 | 7.34E+08 | 0.14 | -1.32    | 3.66 | 0.06 |
| E1 | TKW  | 4A | AX.89446059 | 7.40E+08 | 0.16 | -1.40    | 4.40 | 0.08 |
| E1 | TKW  | 4A | AX.89563022 | 7.33E+08 | 0.22 | -1.03    | 3.17 | 0.05 |
| E1 | TKW  | 4A | AX.89353399 | 7.26E+08 | 0.20 | -1.04    | 3.01 | 0.05 |
| E1 | TKW  | 4A | AX.89462343 | 7.27E+08 | 0.27 | -0.94    | 3.06 | 0.05 |
| E1 | TKW  | 4A | AX.89370040 | 7.42E+08 | 0.10 | -1.37    | 3.00 | 0.05 |
| E1 | TKW  | 4A | AX.89362942 | 7.26E+08 | 0.23 | -0.99    | 3.08 | 0.05 |



|    |      |    |             |          |      |          |      |      |
|----|------|----|-------------|----------|------|----------|------|------|
| E1 | TKW  | 4A | AX.89751035 | 7.27E+08 | 0.21 | -1.07    | 3.25 | 0.05 |
| E1 | TKW  | 4A | AX.89327430 | 7.26E+08 | 0.28 | -1.00    | 3.43 | 0.06 |
| E1 | TKW  | 4A | AX.89327540 | 7.26E+08 | 0.20 | -1.04    | 3.01 | 0.05 |
| E1 | TKW  | 4A | AX.89595323 | 7.26E+08 | 0.20 | -1.09    | 3.22 | 0.05 |
| E1 | TKW  | 4A | AX.89537546 | 7.31E+08 | 0.16 | -1.16    | 3.11 | 0.05 |
| E1 | TKW  | 4A | AX.89335287 | 7.34E+08 | 0.14 | -1.18    | 3.03 | 0.05 |
| E1 | TKW  | 4A | AX.89682870 | 7.40E+08 | 0.12 | -1.40    | 3.44 | 0.06 |
| E1 | TKW  | 4A | AX.89453985 | 7.34E+08 | 0.18 | -1.20    | 3.65 | 0.06 |
| E1 | TKW  | 4A | AX.89310426 | 7.41E+08 | 0.35 | -0.94    | 3.48 | 0.06 |
| E1 | TKW  | 4A | AX.89333861 | 7.26E+08 | 0.18 | -1.08    | 3.01 | 0.05 |
| E1 | TKW  | 4A | AX.89770697 | 7.26E+08 | 0.20 | -1.06    | 3.08 | 0.05 |
| E1 | TKW  | 4A | AX.89429351 | 7.27E+08 | 0.27 | -0.94    | 3.06 | 0.05 |
| E1 | TKW  | 4A | AX.89738968 | 7.34E+08 | 0.19 | -1.32    | 4.39 | 0.08 |
| E1 | GPM2 | 4A | AX.89428920 | 4.09E+07 | 0.10 | -1141.22 | 3.98 | 0.07 |
| E1 | TKW  | 4A | AX.89518458 | 7.33E+08 | 0.22 | -1.03    | 3.17 | 0.05 |
| E1 | TKW  | 4A | AX.89731769 | 7.27E+08 | 0.22 | -1.18    | 3.97 | 0.07 |
| E1 | TKW  | 4A | AX.89594507 | 7.31E+08 | 0.27 | -1.00    | 3.41 | 0.06 |
| E1 | TKW  | 4A | AX.89375502 | 7.40E+08 | 0.17 | -1.46    | 4.95 | 0.09 |
| E1 | TKW  | 4A | AX.89486310 | 7.33E+08 | 0.22 | -1.03    | 3.17 | 0.05 |
| E1 | TKW  | 4A | AX.89360065 | 7.27E+08 | 0.27 | -0.94    | 3.06 | 0.05 |
| E1 | GPM2 | 4A | AX.89544078 | 4.11E+07 | 0.10 | -1141.22 | 3.98 | 0.07 |
| E1 | TKW  | 4A | AX.89377182 | 7.27E+08 | 0.21 | -1.07    | 3.30 | 0.05 |
| E1 | TKW  | 4A | AX.89747478 | 7.41E+08 | 0.36 | -0.91    | 3.29 | 0.05 |
| E1 | TKW  | 4A | AX.89612888 | 7.26E+08 | 0.20 | -1.05    | 3.10 | 0.05 |
| E1 | TKW  | 4A | AX.89686188 | 7.40E+08 | 0.10 | -1.60    | 3.95 | 0.07 |
| E1 | TKW  | 4A | AX.89662356 | 7.26E+08 | 0.24 | -1.04    | 3.34 | 0.05 |
| E1 | TKW  | 4A | AX.89346010 | 7.32E+08 | 0.26 | -0.98    | 3.22 | 0.05 |
| E1 | GY   | 4A | AX.89776458 | 7.08E+08 | 0.16 | -3.16    | 3.15 | 0.06 |
| E1 | GY   | 4A | AX.89371746 | 7.31E+08 | 0.27 | -3.77    | 6.06 | 0.10 |
| E1 | TKW  | 4A | AX.89589414 | 7.30E+08 | 0.19 | -1.13    | 3.31 | 0.05 |
| E1 | TKW  | 4A | AX.89775295 | 7.26E+08 | 0.20 | -1.04    | 3.01 | 0.05 |
| E1 | GPM2 | 4A | AX.89760720 | 1.76E+07 | 0.27 | 803.14   | 4.35 | 0.08 |
| E1 | GY   | 4A | AX.89373507 | 7.41E+08 | 0.30 | -2.68    | 3.49 | 0.05 |
| E1 | TKW  | 4A | AX.89341689 | 7.42E+08 | 0.15 | -1.43    | 4.28 | 0.07 |
| E1 | TKW  | 4A | AX.89564765 | 7.39E+08 | 0.13 | -1.43    | 3.99 | 0.07 |
| E1 | TKW  | 4A | AX.89417560 | 6.04E+08 | 0.43 | -0.90    | 3.44 | 0.06 |
| E1 | TKW  | 4A | AX.89579752 | 7.43E+08 | 0.20 | -1.14    | 3.48 | 0.06 |
| E1 | TKW  | 4A | AX.89328354 | 7.39E+08 | 0.16 | -1.35    | 4.05 | 0.07 |
| E1 | TKW  | 4A | AX.89474542 | 7.26E+08 | 0.24 | -1.02    | 3.28 | 0.05 |
| E1 | TKW  | 4A | AX.89565646 | 7.43E+08 | 0.21 | -1.12    | 3.56 | 0.06 |
| E1 | TKW  | 4A | AX.89624256 | 7.44E+08 | 0.20 | -1.11    | 3.36 | 0.06 |
| E1 | TKW  | 4A | AX.89465835 | 7.41E+08 | 0.35 | -0.88    | 3.07 | 0.05 |
| E1 | TKW  | 4A | AX.89499407 | 7.30E+08 | 0.15 | -1.16    | 3.07 | 0.05 |
| E1 | TKW  | 4A | AX.89457592 | 7.26E+08 | 0.24 | -0.98    | 3.02 | 0.05 |
| E1 | TKW  | 4A | AX.89364766 | 7.26E+08 | 0.24 | -1.04    | 3.34 | 0.05 |
| E1 | TKW  | 4A | AX.89741910 | 7.39E+08 | 0.09 | -1.47    | 3.05 | 0.05 |
| E1 | TKW  | 4A | AX.89610216 | 7.30E+08 | 0.20 | -1.18    | 3.75 | 0.06 |
| E1 | TKW  | 4A | AX.89639898 | 7.44E+08 | 0.21 | -1.17    | 3.81 | 0.06 |
| E1 | TKW  | 4A | AX.89405213 | 7.39E+08 | 0.14 | -1.23    | 3.16 | 0.05 |
| E1 | TKW  | 4A | AX.89690364 | 7.40E+08 | 0.36 | -0.91    | 3.29 | 0.05 |

|    |      |    |             |          |      |          |      |      |
|----|------|----|-------------|----------|------|----------|------|------|
| E1 | TKW  | 4A | AX.89599133 | 7.40E+08 | 0.34 | -0.91    | 3.24 | 0.05 |
| E1 | GPM2 | 4A | AX.89746072 | 4.09E+07 | 0.11 | -1001.42 | 3.40 | 0.05 |
| E1 | TKW  | 4A | AX.89439391 | 7.42E+08 | 0.10 | -1.37    | 3.00 | 0.05 |
| E1 | TKW  | 4A | AX.89371746 | 7.31E+08 | 0.27 | -1.00    | 3.41 | 0.06 |
| E1 | GPM2 | 4A | AX.89598986 | 4.11E+07 | 0.10 | -1141.22 | 3.98 | 0.07 |
| E1 | TKW  | 4A | AX.89448363 | 7.40E+08 | 0.13 | -1.55    | 4.57 | 0.08 |
| E1 | TKW  | 4A | AX.89582475 | 7.40E+08 | 0.17 | -1.34    | 4.15 | 0.07 |
| E1 | TKW  | 4A | AX.89529222 | 7.26E+08 | 0.24 | -1.02    | 3.28 | 0.05 |
| E1 | TKW  | 4A | AX.89677918 | 7.28E+08 | 0.27 | -0.94    | 3.06 | 0.05 |
| E1 | TKW  | 4A | AX.89423722 | 6.04E+08 | 0.38 | -0.92    | 3.41 | 0.06 |
| E1 | TKW  | 4A | AX.89372187 | 7.26E+08 | 0.15 | -1.29    | 3.60 | 0.06 |
| E1 | TKW  | 4A | AX.89380583 | 7.27E+08 | 0.15 | -1.21    | 3.23 | 0.05 |
| E1 | TKW  | 4A | AX.89367604 | 7.25E+08 | 0.18 | -1.08    | 3.01 | 0.05 |
| E1 | TKW  | 4A | AX.89539186 | 7.43E+08 | 0.19 | -1.10    | 3.23 | 0.05 |
| E1 | TKW  | 4A | AX.89363602 | 6.04E+08 | 0.43 | -0.90    | 3.44 | 0.06 |
| E1 | TKW  | 4A | AX.89621604 | 7.31E+08 | 0.27 | -1.10    | 3.97 | 0.07 |
| E1 | TKW  | 4A | AX.89369162 | 7.26E+08 | 0.20 | -1.04    | 3.01 | 0.05 |
| E1 | TKW  | 4A | AX.89530069 | 7.40E+08 | 0.17 | -1.34    | 4.15 | 0.07 |
| E1 | TKW  | 4A | AX.89680594 | 7.26E+08 | 0.18 | -1.08    | 3.01 | 0.05 |
| E1 | TKW  | 4A | AX.89537167 | 7.39E+08 | 0.13 | -1.33    | 3.51 | 0.06 |
| E1 | TKW  | 4A | AX.89610678 | 7.26E+08 | 0.20 | -1.04    | 3.01 | 0.05 |
| E1 | TKW  | 4A | AX.89412618 | 7.34E+08 | 0.14 | -1.18    | 3.03 | 0.05 |
| E1 | TKW  | 4A | AX.89594512 | 5.97E+08 | 0.48 | -0.85    | 3.12 | 0.05 |
| E1 | GY   | 4A | AX.89537376 | 7.24E+08 | 0.07 | -4.93    | 3.65 | 0.06 |
| E1 | TKW  | 4A | AX.89522321 | 7.42E+08 | 0.10 | -1.37    | 3.00 | 0.05 |
| E1 | TKW  | 4A | AX.89744361 | 7.26E+08 | 0.20 | -1.09    | 3.22 | 0.05 |
| E1 | TKW  | 4A | AX.89483630 | 7.41E+08 | 0.36 | -0.91    | 3.29 | 0.05 |
| E1 | TKW  | 4A | AX.89520266 | 7.26E+08 | 0.20 | -1.04    | 3.01 | 0.05 |
| E1 | TKW  | 4A | AX.89310663 | 7.28E+08 | 0.09 | -1.51    | 3.32 | 0.05 |
| E1 | TKW  | 4A | AX.89415948 | 7.27E+08 | 0.26 | -1.19    | 4.44 | 0.08 |
| E1 | TKW  | 4A | AX.86166405 | 7.26E+08 | 0.20 | -1.04    | 3.01 | 0.05 |
| E1 | TKW  | 4A | AX.89762249 | 7.30E+08 | 0.16 | -1.21    | 3.36 | 0.06 |
| E1 | TKW  | 4A | AX.89721231 | 7.33E+08 | 0.11 | -1.45    | 3.54 | 0.06 |
| E1 | TKW  | 4A | AX.89505951 | 7.26E+08 | 0.18 | -1.08    | 3.01 | 0.05 |
| E1 | TKW  | 4A | AX.89735480 | 7.40E+08 | 0.36 | -0.91    | 3.29 | 0.05 |
| E1 | TKW  | 4A | AX.89690177 | 7.26E+08 | 0.18 | -1.08    | 3.01 | 0.05 |
| E1 | TKW  | 4A | AX.89767812 | 7.31E+08 | 0.27 | -1.04    | 3.60 | 0.06 |
| E2 | GY   | 4A | AX.89755668 | 5.95E+07 | 0.08 | -3.38    | 3.02 | 0.04 |
| E2 | SPM2 | 4A | AX.89611126 | 7.30E+08 | 0.17 | 15.54    | 3.07 | 0.05 |
| E2 | GY   | 4A | AX.89329174 | 7.22E+08 | 0.18 | -3.01    | 4.31 | 0.07 |
| E2 | GY   | 4A | AX.89400490 | 7.24E+08 | 0.06 | -4.62    | 3.75 | 0.05 |
| E2 | GPS  | 4A | AX.89632483 | 5.45E+08 | 0.33 | 1.49     | 3.34 | 0.06 |
| E2 | GY   | 4A | AX.89423999 | 7.24E+08 | 0.06 | -4.92    | 4.13 | 0.06 |
| E2 | GY   | 4A | AX.89330373 | 7.26E+08 | 0.11 | -3.28    | 3.45 | 0.05 |
| E2 | GY   | 4A | AX.89401350 | 7.21E+08 | 0.15 | -2.66    | 3.14 | 0.05 |
| E2 | GY   | 4A | AX.86168551 | 7.20E+08 | 0.18 | -2.43    | 3.01 | 0.05 |
| E2 | GY   | 4A | AX.89437107 | 7.21E+08 | 0.15 | -2.66    | 3.14 | 0.05 |
| E2 | GY   | 4A | AX.89437107 | 7.21E+08 | 0.15 | -2.66    | 3.14 | 0.05 |
| E2 | GY   | 4A | AX.89727342 | 7.23E+08 | 0.06 | -4.05    | 3.18 | 0.04 |
| E2 | SPM2 | 4A | AX.89498000 | 5.84E+08 | 0.07 | 25.13    | 3.76 | 0.06 |

|    |      |    |             |          |      |        |      |      |
|----|------|----|-------------|----------|------|--------|------|------|
| E2 | GY   | 4A | AX.89331953 | 7.19E+08 | 0.19 | -2.50  | 3.20 | 0.05 |
| E2 | GY   | 4A | AX.89592533 | 7.26E+08 | 0.10 | -3.21  | 3.19 | 0.04 |
| E2 | GY   | 4A | AX.89332573 | 7.26E+08 | 0.13 | -3.18  | 3.67 | 0.05 |
| E2 | GY   | 4A | AX.89332573 | 7.26E+08 | 0.13 | -3.18  | 3.67 | 0.05 |
| E2 | GY   | 4A | AX.89332687 | 7.34E+08 | 0.40 | -2.07  | 3.42 | 0.07 |
| E2 | SPM2 | 4A | AX.89777494 | 6.10E+08 | 0.31 | -14.27 | 3.77 | 0.06 |
| E2 | GY   | 4A | AX.89333298 | 7.26E+08 | 0.13 | -3.18  | 3.67 | 0.05 |
| E2 | GY   | 4A | AX.89473221 | 7.34E+08 | 0.40 | -2.01  | 3.23 | 0.06 |
| E2 | SPM2 | 4A | AX.89641499 | 6.14E+08 | 0.10 | 24.05  | 4.31 | 0.08 |
| E2 | SPM2 | 4A | AX.89691321 | 7.30E+08 | 0.13 | 18.37  | 3.36 | 0.06 |
| E2 | GY   | 4A | AX.89404258 | 7.16E+08 | 0.08 | -3.48  | 3.03 | 0.04 |
| E2 | GY   | 4A | AX.89404258 | 7.16E+08 | 0.08 | -3.48  | 3.03 | 0.04 |
| E2 | GY   | 4A | AX.89474564 | 7.26E+08 | 0.11 | -3.57  | 4.05 | 0.05 |
| E2 | GY   | 4A | AX.89639515 | 7.24E+08 | 0.07 | -4.12  | 3.67 | 0.05 |
| E2 | GY   | 4A | AX.89380919 | 7.25E+08 | 0.06 | -4.62  | 3.75 | 0.05 |
| E2 | GY   | 4A | AX.89579660 | 7.26E+08 | 0.11 | -3.98  | 4.98 | 0.08 |
| E2 | GY   | 4A | AX.89579660 | 7.26E+08 | 0.11 | -3.98  | 4.98 | 0.08 |
| E2 | SPM2 | 4A | AX.89589414 | 7.30E+08 | 0.19 | 14.92  | 3.02 | 0.05 |
| E2 | TKW  | 4A | AX.89483630 | 7.41E+08 | 0.36 | -1.05  | 3.76 | 0.06 |
| E2 | GPS  | 4A | AX.89702776 | 5.44E+08 | 0.33 | 1.50   | 3.41 | 0.06 |
| E2 | GY   | 4A | AX.89336841 | 7.25E+08 | 0.07 | -4.53  | 4.31 | 0.06 |
| E2 | GPS  | 4A | AX.89601326 | 5.46E+08 | 0.33 | 1.49   | 3.34 | 0.06 |
| E2 | GPS  | 4A | AX.89573483 | 5.66E+08 | 0.44 | 1.40   | 3.29 | 0.06 |
| E2 | GPS  | 4A | AX.89445978 | 5.45E+08 | 0.33 | 1.49   | 3.34 | 0.06 |
| E2 | SPM2 | 4A | AX.89439836 | 7.30E+08 | 0.09 | 21.03  | 3.17 | 0.05 |
| E2 | GPS  | 4A | AX.89316300 | 5.66E+08 | 0.45 | 1.35   | 3.09 | 0.06 |
| E2 | GY   | 4A | AX.89409546 | 7.23E+08 | 0.06 | -4.05  | 3.18 | 0.04 |
| E2 | GY   | 4A | AX.89526893 | 7.24E+08 | 0.06 | -4.68  | 4.08 | 0.06 |
| E2 | GY   | 4A | AX.89548890 | 7.25E+08 | 0.11 | -3.34  | 3.64 | 0.05 |
| E2 | GPS  | 4A | AX.89379588 | 5.95E+08 | 0.35 | 1.55   | 3.67 | 0.06 |
| E2 | GPS  | 4A | AX.89754071 | 5.44E+08 | 0.34 | 1.47   | 3.29 | 0.06 |
| E2 | GPS  | 4A | AX.89442064 | 5.48E+08 | 0.33 | 1.59   | 3.73 | 0.07 |
| E2 | GPS  | 4A | AX.89692052 | 5.46E+08 | 0.33 | 1.49   | 3.34 | 0.06 |
| E2 | GPS  | 4A | AX.89504360 | 5.95E+08 | 0.35 | 1.55   | 3.67 | 0.06 |
| E2 | SPM2 | 4A | AX.89333648 | 7.30E+08 | 0.10 | 19.75  | 3.07 | 0.05 |
| E2 | GPS  | 4A | AX.89627932 | 5.94E+08 | 0.35 | 1.55   | 3.67 | 0.06 |
| E2 | GY   | 4A | AX.89491600 | 7.20E+08 | 0.21 | -2.60  | 3.75 | 0.06 |
| E2 | GY   | 4A | AX.89491600 | 7.20E+08 | 0.21 | -2.60  | 3.75 | 0.06 |
| E2 | GY   | 4A | AX.89452318 | 7.23E+08 | 0.06 | -4.62  | 3.75 | 0.05 |
| E2 | SPM2 | 4A | AX.89777321 | 7.30E+08 | 0.13 | 17.20  | 3.00 | 0.05 |
| E2 | GPS  | 4A | AX.89648991 | 5.45E+08 | 0.33 | 1.43   | 3.11 | 0.06 |
| E2 | GY   | 4A | AX.89749239 | 7.19E+08 | 0.17 | -2.94  | 3.97 | 0.07 |
| E2 | GY   | 4A | AX.86160988 | 7.42E+08 | 0.14 | -2.80  | 3.28 | 0.04 |
| E2 | GY   | 4A | AX.86160988 | 7.42E+08 | 0.14 | -2.80  | 3.28 | 0.04 |
| E2 | GPS  | 4A | AX.89702579 | 5.46E+08 | 0.33 | 1.66   | 4.02 | 0.07 |
| E2 | GPS  | 4A | AX.89557186 | 5.46E+08 | 0.32 | 1.61   | 3.77 | 0.07 |
| E2 | GY   | 4A | AX.89637772 | 7.21E+08 | 0.17 | -2.94  | 3.97 | 0.07 |
| E2 | GPS  | 4A | AX.89453672 | 5.67E+08 | 0.45 | 1.35   | 3.09 | 0.06 |
| E2 | GY   | 4A | AX.89468920 | 7.22E+08 | 0.17 | -2.94  | 3.97 | 0.07 |
| E2 | GY   | 4A | AX.89468920 | 7.22E+08 | 0.17 | -2.94  | 3.97 | 0.07 |

|    |     |    |             |          |      |       |      |      |
|----|-----|----|-------------|----------|------|-------|------|------|
| E2 | GPS | 4A | AX.89408403 | 5.95E+08 | 0.35 | 1.55  | 3.67 | 0.06 |
| E2 | GY  | 4A | AX.89376538 | 7.20E+08 | 0.19 | -2.71 | 3.70 | 0.06 |
| E2 | GY  | 4A | AX.89376538 | 7.20E+08 | 0.19 | -2.71 | 3.70 | 0.06 |
| E2 | GPS | 4A | AX.89684700 | 5.45E+08 | 0.33 | 1.49  | 3.34 | 0.06 |
| E2 | GY  | 4A | AX.89446861 | 7.33E+08 | 0.11 | -4.25 | 5.55 | 0.07 |
| E2 | GY  | 4A | AX.89446861 | 7.33E+08 | 0.11 | -4.25 | 5.55 | 0.07 |
| E2 | GY  | 4A | AX.89435512 | 7.20E+08 | 0.15 | -2.76 | 3.29 | 0.05 |
| E2 | GY  | 4A | AX.89435512 | 7.20E+08 | 0.15 | -2.76 | 3.29 | 0.05 |
| E2 | GPS | 4A | AX.89478975 | 5.62E+08 | 0.48 | 1.39  | 3.29 | 0.06 |
| E2 | GY  | 4A | AX.86165449 | 7.26E+08 | 0.10 | -3.61 | 3.93 | 0.06 |
| E2 | GY  | 4A | AX.86165449 | 7.26E+08 | 0.10 | -3.61 | 3.93 | 0.06 |
| E2 | GY  | 4A | AX.89447138 | 7.20E+08 | 0.17 | -2.94 | 3.97 | 0.07 |
| E2 | GY  | 4A | AX.89447138 | 7.20E+08 | 0.17 | -2.94 | 3.97 | 0.07 |
| E2 | GY  | 4A | AX.89587577 | 7.19E+08 | 0.22 | -2.76 | 4.21 | 0.07 |
| E2 | GY  | 4A | AX.89587577 | 7.19E+08 | 0.22 | -2.76 | 4.21 | 0.07 |
| E2 | GPS | 4A | AX.89324372 | 5.95E+08 | 0.42 | 1.35  | 3.08 | 0.04 |
| E2 | GY  | 4A | AX.89529986 | 7.37E+08 | 0.08 | -3.56 | 3.08 | 0.04 |
| E2 | GY  | 4A | AX.89483845 | 7.23E+08 | 0.07 | -4.83 | 4.58 | 0.06 |
| E2 | GY  | 4A | AX.89483845 | 7.23E+08 | 0.07 | -4.83 | 4.58 | 0.06 |
| E2 | GPS | 4A | AX.89480796 | 5.44E+08 | 0.33 | 1.50  | 3.41 | 0.06 |
| E2 | GY  | 4A | AX.86168547 | 7.20E+08 | 0.18 | -2.43 | 3.01 | 0.05 |
| E2 | GY  | 4A | AX.86168547 | 7.20E+08 | 0.18 | -2.43 | 3.01 | 0.05 |
| E2 | GY  | 4A | AX.86168548 | 7.20E+08 | 0.18 | -2.43 | 3.01 | 0.05 |
| E2 | GY  | 4A | AX.86168548 | 7.20E+08 | 0.18 | -2.43 | 3.01 | 0.05 |
| E2 | GY  | 4A | AX.86168551 | 7.20E+08 | 0.18 | -2.43 | 3.01 | 0.05 |
| E2 | GY  | 4A | AX.86168553 | 7.20E+08 | 0.18 | -2.43 | 3.01 | 0.05 |
| E2 | GY  | 4A | AX.86168553 | 7.20E+08 | 0.18 | -2.43 | 3.01 | 0.05 |
| E2 | GY  | 4A | AX.89685609 | 7.20E+08 | 0.17 | -2.84 | 3.81 | 0.06 |
| E2 | GY  | 4A | AX.89685609 | 7.20E+08 | 0.17 | -2.84 | 3.81 | 0.06 |
| E2 | GPS | 4A | AX.89409886 | 5.44E+08 | 0.34 | 1.47  | 3.29 | 0.06 |
| E2 | GPS | 4A | AX.89435499 | 5.95E+08 | 0.35 | 1.55  | 3.67 | 0.06 |
| E2 | GY  | 4A | AX.89377870 | 7.24E+08 | 0.07 | -4.83 | 4.58 | 0.06 |
| E2 | GY  | 4A | AX.89377870 | 7.24E+08 | 0.07 | -4.83 | 4.58 | 0.06 |
| E2 | GY  | 4A | AX.89495274 | 7.22E+08 | 0.17 | -2.94 | 3.97 | 0.07 |
| E2 | GY  | 4A | AX.89495274 | 7.22E+08 | 0.17 | -2.94 | 3.97 | 0.07 |
| E2 | GPS | 4A | AX.89335784 | 5.95E+08 | 0.35 | 1.55  | 3.67 | 0.06 |
| E2 | GY  | 4A | AX.89448771 | 7.24E+08 | 0.06 | -4.62 | 3.75 | 0.05 |
| E2 | GY  | 4A | AX.89448771 | 7.24E+08 | 0.06 | -4.62 | 3.75 | 0.05 |
| E2 | GPS | 4A | AX.89560286 | 5.45E+08 | 0.33 | 1.43  | 3.11 | 0.06 |
| E2 | GY  | 4A | AX.89331953 | 7.19E+08 | 0.19 | -2.50 | 3.20 | 0.05 |
| E2 | GPS | 4A | AX.89400740 | 5.44E+08 | 0.34 | 1.47  | 3.29 | 0.06 |
| E2 | GPS | 4A | AX.89513529 | 5.45E+08 | 0.33 | 1.43  | 3.11 | 0.06 |
| E2 | GPS | 4A | AX.89548503 | 5.45E+08 | 0.33 | 1.49  | 3.34 | 0.06 |
| E2 | GY  | 4A | AX.89310232 | 1.05E+08 | 0.19 | -2.61 | 3.38 | 0.04 |
| E2 | GY  | 4A | AX.89310232 | 1.05E+08 | 0.19 | -2.61 | 3.38 | 0.04 |
| E2 | GPS | 4A | AX.89369893 | 5.66E+08 | 0.45 | 1.35  | 3.09 | 0.06 |
| E2 | GY  | 4A | AX.89322015 | 7.39E+08 | 0.11 | -3.11 | 3.12 | 0.04 |
| E2 | GY  | 4A | AX.89663245 | 7.19E+08 | 0.17 | -2.94 | 3.97 | 0.07 |
| E2 | GY  | 4A | AX.89663245 | 7.19E+08 | 0.17 | -2.94 | 3.97 | 0.07 |
| E2 | GY  | 4A | AX.89521160 | 2.03E+08 | 0.11 | -3.00 | 3.05 | 0.04 |

|    |      |    |             |          |      |        |      |      |
|----|------|----|-------------|----------|------|--------|------|------|
| E2 | GY   | 4A | AX.89521160 | 2.03E+08 | 0.11 | -3.00  | 3.05 | 0.04 |
| E2 | GY   | 4A | AX.89712135 | 7.25E+08 | 0.06 | -4.62  | 3.75 | 0.05 |
| E2 | GY   | 4A | AX.89566818 | 7.24E+08 | 0.07 | -4.83  | 4.58 | 0.06 |
| E2 | GY   | 4A | AX.89566818 | 7.24E+08 | 0.07 | -4.83  | 4.58 | 0.06 |
| E2 | GPS  | 4A | AX.89578800 | 5.45E+08 | 0.33 | 1.49   | 3.34 | 0.06 |
| E2 | GY   | 4A | AX.89486698 | 7.42E+07 | 0.07 | -3.81  | 3.05 | 0.04 |
| E2 | GY   | 4A | AX.89486698 | 7.42E+07 | 0.07 | -3.81  | 3.05 | 0.04 |
| E2 | GPS  | 4A | AX.89401469 | 5.67E+08 | 0.45 | 1.35   | 3.09 | 0.06 |
| E2 | GPS  | 4A | AX.89321081 | 5.45E+08 | 0.33 | 1.49   | 3.34 | 0.06 |
| E2 | GPS  | 4A | AX.89324041 | 5.67E+08 | 0.45 | 1.35   | 3.09 | 0.06 |
| E2 | GPS  | 4A | AX.89448692 | 5.67E+08 | 0.45 | 1.35   | 3.09 | 0.06 |
| E2 | GY   | 4A | AX.89311564 | 7.21E+08 | 0.15 | -2.66  | 3.14 | 0.05 |
| E2 | GY   | 4A | AX.89311564 | 7.21E+08 | 0.15 | -2.66  | 3.14 | 0.05 |
| E2 | GY   | 4A | AX.89738343 | 1.03E+08 | 0.19 | -2.47  | 3.08 | 0.04 |
| E2 | GY   | 4A | AX.89738343 | 1.03E+08 | 0.19 | -2.47  | 3.08 | 0.04 |
| E2 | GPS  | 4A | AX.89555317 | 5.45E+08 | 0.33 | 1.49   | 3.34 | 0.06 |
| E2 | GPS  | 4A | AX.89720617 | 5.95E+08 | 0.35 | 1.55   | 3.67 | 0.06 |
| E2 | GY   | 4A | AX.89380919 | 7.25E+08 | 0.06 | -4.62  | 3.75 | 0.05 |
| E2 | GPM2 | 4A | AX.89602523 | 6.04E+08 | 0.32 | 569.05 | 3.47 | 0.07 |
| E2 | GPS  | 4A | AX.89514361 | 5.66E+08 | 0.46 | 1.34   | 3.07 | 0.06 |
| E2 | GY   | 4A | AX.89523678 | 7.26E+08 | 0.18 | -2.54  | 3.12 | 0.04 |
| E2 | GPS  | 4A | AX.89517350 | 5.45E+08 | 0.33 | 1.49   | 3.34 | 0.06 |
| E2 | GY   | 4A | AX.89346268 | 7.34E+08 | 0.13 | -2.88  | 3.17 | 0.04 |
| E2 | GY   | 4A | AX.89346268 | 7.34E+08 | 0.13 | -2.88  | 3.17 | 0.04 |
| E2 | GPS  | 4A | AX.89645150 | 5.47E+08 | 0.33 | 1.65   | 3.98 | 0.07 |
| E2 | GPS  | 4A | AX.89667681 | 5.66E+08 | 0.45 | 1.42   | 3.38 | 0.06 |
| E2 | GPS  | 4A | AX.89752513 | 5.95E+08 | 0.35 | 1.55   | 3.67 | 0.06 |
| E2 | GY   | 4A | AX.89313341 | 7.39E+08 | 0.12 | -3.59  | 4.26 | 0.06 |
| E2 | GY   | 4A | AX.89313341 | 7.39E+08 | 0.12 | -3.59  | 4.26 | 0.06 |
| E2 | GPS  | 4A | AX.89428154 | 5.45E+08 | 0.33 | 1.49   | 3.34 | 0.06 |
| E2 | GY   | 4A | AX.89524550 | 7.39E+08 | 0.11 | -3.11  | 3.12 | 0.04 |
| E2 | GY   | 4A | AX.89524550 | 7.39E+08 | 0.11 | -3.11  | 3.12 | 0.04 |
| E2 | GPS  | 4A | AX.89731999 | 5.44E+08 | 0.34 | 1.47   | 3.29 | 0.06 |
| E2 | GY   | 4A | AX.89430756 | 7.24E+08 | 0.06 | -4.62  | 3.75 | 0.05 |
| E2 | GPS  | 4A | AX.89696836 | 5.45E+08 | 0.33 | 1.49   | 3.34 | 0.06 |
| E2 | GPS  | 4A | AX.89349328 | 5.95E+08 | 0.35 | 1.55   | 3.67 | 0.06 |
| E2 | GY   | 4A | AX.89525651 | 7.24E+08 | 0.07 | -4.83  | 4.58 | 0.06 |
| E2 | GY   | 4A | AX.89525651 | 7.24E+08 | 0.07 | -4.83  | 4.58 | 0.06 |
| E2 | GPS  | 4A | AX.89693645 | 5.95E+08 | 0.35 | 1.55   | 3.67 | 0.06 |
| E2 | GY   | 4A | AX.89383862 | 7.22E+08 | 0.17 | -2.85  | 3.77 | 0.07 |
| E2 | GY   | 4A | AX.89383862 | 7.22E+08 | 0.17 | -2.85  | 3.77 | 0.07 |
| E2 | GY   | 4A | AX.89718118 | 7.22E+08 | 0.07 | -3.91  | 3.18 | 0.04 |
| E2 | GY   | 4A | AX.89718118 | 7.22E+08 | 0.07 | -3.91  | 3.18 | 0.04 |
| E2 | GY   | 4A | AX.89454827 | 7.21E+08 | 0.17 | -2.85  | 3.77 | 0.07 |
| E2 | GY   | 4A | AX.89454827 | 7.21E+08 | 0.17 | -2.85  | 3.77 | 0.07 |
| E2 | GY   | 4A | AX.89421360 | 7.22E+08 | 0.17 | -2.94  | 3.97 | 0.07 |
| E2 | GY   | 4A | AX.89421360 | 7.22E+08 | 0.17 | -2.94  | 3.97 | 0.07 |
| E2 | GY   | 4A | AX.89316812 | 8.74E+07 | 0.10 | -3.32  | 3.30 | 0.05 |
| E2 | GY   | 4A | AX.89316812 | 8.74E+07 | 0.10 | -3.32  | 3.30 | 0.05 |
| E2 | GY   | 4A | AX.89328332 | 7.39E+08 | 0.11 | -3.11  | 3.12 | 0.04 |

|    |     |    |             |          |      |       |      |      |
|----|-----|----|-------------|----------|------|-------|------|------|
| E2 | GY  | 4A | AX.89597931 | 7.27E+08 | 0.15 | -2.62 | 3.03 | 0.04 |
| E2 | GY  | 4A | AX.89597931 | 7.27E+08 | 0.15 | -2.62 | 3.03 | 0.04 |
| E2 | GY  | 4A | AX.89456312 | 7.20E+08 | 0.16 | -3.13 | 4.34 | 0.07 |
| E2 | GY  | 4A | AX.89456312 | 7.20E+08 | 0.16 | -3.13 | 4.34 | 0.07 |
| E2 | GY  | 4A | AX.89749239 | 7.19E+08 | 0.17 | -2.94 | 3.97 | 0.07 |
| E2 | GY  | 4A | AX.89422337 | 7.21E+08 | 0.17 | -2.66 | 3.40 | 0.06 |
| E2 | GY  | 4A | AX.89422337 | 7.21E+08 | 0.17 | -2.66 | 3.40 | 0.06 |
| E2 | GY  | 4A | AX.89671253 | 7.22E+08 | 0.16 | -3.03 | 4.11 | 0.07 |
| E2 | GY  | 4A | AX.89671253 | 7.22E+08 | 0.16 | -3.03 | 4.11 | 0.07 |
| E2 | GY  | 4A | AX.89637772 | 7.21E+08 | 0.17 | -2.94 | 3.97 | 0.07 |
| E2 | GY  | 4A | AX.89602206 | 7.24E+08 | 0.06 | -4.62 | 3.75 | 0.05 |
| E2 | GY  | 4A | AX.89602206 | 7.24E+08 | 0.06 | -4.62 | 3.75 | 0.05 |
| E2 | GY  | 4A | AX.89423359 | 7.24E+08 | 0.07 | -4.83 | 4.58 | 0.06 |
| E2 | GY  | 4A | AX.89423359 | 7.24E+08 | 0.07 | -4.83 | 4.58 | 0.06 |
| E2 | GY  | 4A | AX.89352927 | 7.20E+08 | 0.17 | -2.84 | 3.81 | 0.06 |
| E2 | GY  | 4A | AX.89352927 | 7.20E+08 | 0.17 | -2.84 | 3.81 | 0.06 |
| E2 | GY  | 4A | AX.89529986 | 7.37E+08 | 0.08 | -3.56 | 3.08 | 0.04 |
| E2 | GY  | 4A | AX.89458917 | 7.35E+07 | 0.11 | -3.11 | 3.15 | 0.04 |
| E2 | GY  | 4A | AX.89458917 | 7.35E+07 | 0.11 | -3.11 | 3.15 | 0.04 |
| E2 | GY  | 4A | AX.89459056 | 7.17E+08 | 0.23 | -2.29 | 3.18 | 0.05 |
| E2 | GY  | 4A | AX.89459056 | 7.17E+08 | 0.23 | -2.29 | 3.18 | 0.05 |
| E2 | TKW | 4A | AX.89426124 | 6.04E+08 | 0.44 | -0.98 | 3.51 | 0.06 |
| E2 | GY  | 4A | AX.89746890 | 7.25E+08 | 0.07 | -4.38 | 4.27 | 0.06 |
| E2 | GY  | 4A | AX.89746890 | 7.25E+08 | 0.07 | -4.38 | 4.27 | 0.06 |
| E2 | GY  | 4A | AX.89320706 | 7.16E+08 | 0.08 | -3.48 | 3.03 | 0.04 |
| E2 | GY  | 4A | AX.89320706 | 7.16E+08 | 0.08 | -3.48 | 3.03 | 0.04 |
| E2 | GY  | 4A | AX.89519742 | 7.26E+08 | 0.06 | -3.95 | 3.07 | 0.04 |
| E2 | GY  | 4A | AX.89519742 | 7.26E+08 | 0.06 | -3.95 | 3.07 | 0.04 |
| E2 | GY  | 4A | AX.89755151 | 7.19E+08 | 0.19 | -2.50 | 3.20 | 0.05 |
| E2 | GY  | 4A | AX.89755151 | 7.19E+08 | 0.19 | -2.50 | 3.20 | 0.05 |
| E2 | GPS | 4A | AX.89744175 | 5.44E+08 | 0.34 | 1.47  | 3.29 | 0.06 |
| E2 | GPS | 4A | AX.89530586 | 5.46E+08 | 0.33 | 1.49  | 3.34 | 0.06 |
| E2 | GY  | 4A | AX.89703275 | 7.22E+08 | 0.17 | -2.75 | 3.52 | 0.06 |
| E2 | GY  | 4A | AX.89703275 | 7.22E+08 | 0.17 | -2.75 | 3.52 | 0.06 |
| E2 | GY  | 4A | AX.89760308 | 7.21E+08 | 0.17 | -2.94 | 3.97 | 0.07 |
| E2 | GY  | 4A | AX.89699439 | 7.20E+08 | 0.15 | -2.76 | 3.29 | 0.05 |
| E2 | GY  | 4A | AX.89699439 | 7.20E+08 | 0.15 | -2.76 | 3.29 | 0.05 |
| E2 | GY  | 4A | AX.89321887 | 7.23E+08 | 0.06 | -4.05 | 3.18 | 0.04 |
| E2 | GY  | 4A | AX.89321887 | 7.23E+08 | 0.06 | -4.05 | 3.18 | 0.04 |
| E2 | GY  | 4A | AX.89625179 | 7.22E+08 | 0.17 | -2.94 | 3.97 | 0.07 |
| E2 | GY  | 4A | AX.89367424 | 7.22E+08 | 0.17 | -2.92 | 4.01 | 0.07 |
| E2 | GY  | 4A | AX.89322015 | 7.39E+08 | 0.11 | -3.11 | 3.12 | 0.04 |
| E2 | GY  | 4A | AX.89520523 | 7.24E+08 | 0.06 | -4.62 | 3.75 | 0.05 |
| E2 | GY  | 4A | AX.89520523 | 7.24E+08 | 0.06 | -4.62 | 3.75 | 0.05 |
| E2 | GY  | 4A | AX.89712135 | 7.25E+08 | 0.06 | -4.62 | 3.75 | 0.05 |
| E2 | GY  | 4A | AX.89729945 | 7.34E+08 | 0.12 | -3.05 | 3.20 | 0.04 |
| E2 | GY  | 4A | AX.89729945 | 7.34E+08 | 0.12 | -3.05 | 3.20 | 0.04 |
| E2 | GY  | 4A | AX.89473221 | 7.34E+08 | 0.40 | -2.01 | 3.23 | 0.06 |
| E2 | GY  | 4A | AX.89404144 | 7.20E+08 | 0.19 | -2.71 | 3.70 | 0.06 |
| E2 | GY  | 4A | AX.89652625 | 7.30E+08 | 0.07 | -3.78 | 3.13 | 0.04 |

|    |     |    |             |          |      |       |      |      |
|----|-----|----|-------------|----------|------|-------|------|------|
| E2 | GY  | 4A | AX.89652625 | 7.30E+08 | 0.07 | -3.78 | 3.13 | 0.04 |
| E2 | GY  | 4A | AX.89756968 | 7.53E+07 | 0.11 | -3.11 | 3.15 | 0.04 |
| E2 | GY  | 4A | AX.89756968 | 7.53E+07 | 0.11 | -3.11 | 3.15 | 0.04 |
| E2 | GY  | 4A | AX.89474564 | 7.26E+08 | 0.11 | -3.57 | 4.05 | 0.05 |
| E2 | GY  | 4A | AX.89392892 | 4.50E+08 | 0.12 | -2.98 | 3.11 | 0.04 |
| E2 | GY  | 4A | AX.89392892 | 4.50E+08 | 0.12 | -2.98 | 3.11 | 0.04 |
| E2 | GY  | 4A | AX.89377454 | 7.19E+08 | 0.13 | -2.98 | 3.47 | 0.06 |
| E2 | GY  | 4A | AX.89592944 | 7.16E+08 | 0.08 | -3.48 | 3.03 | 0.04 |
| E2 | GY  | 4A | AX.89592944 | 7.16E+08 | 0.08 | -3.48 | 3.03 | 0.04 |
| E2 | GY  | 4A | AX.89666696 | 7.43E+08 | 0.10 | -3.19 | 3.07 | 0.04 |
| E2 | GY  | 4A | AX.89324248 | 7.43E+08 | 0.15 | -2.90 | 3.55 | 0.05 |
| E2 | GY  | 4A | AX.89324248 | 7.43E+08 | 0.15 | -2.90 | 3.55 | 0.05 |
| E2 | GY  | 4A | AX.89556734 | 7.20E+08 | 0.17 | -2.84 | 3.81 | 0.06 |
| E2 | GY  | 4A | AX.89556734 | 7.20E+08 | 0.17 | -2.84 | 3.81 | 0.06 |
| E2 | GY  | 4A | AX.89475409 | 7.26E+08 | 0.11 | -3.50 | 3.85 | 0.05 |
| E2 | GY  | 4A | AX.89475409 | 7.26E+08 | 0.11 | -3.50 | 3.85 | 0.05 |
| E2 | GY  | 4A | AX.89523678 | 7.26E+08 | 0.18 | -2.54 | 3.12 | 0.04 |
| E2 | GY  | 4A | AX.89606149 | 7.26E+08 | 0.13 | -3.18 | 3.67 | 0.05 |
| E2 | GY  | 4A | AX.89606149 | 7.26E+08 | 0.13 | -3.18 | 3.67 | 0.05 |
| E2 | GY  | 4A | AX.89325572 | 7.26E+08 | 0.08 | -3.76 | 3.43 | 0.05 |
| E2 | GY  | 4A | AX.89325572 | 7.26E+08 | 0.08 | -3.76 | 3.43 | 0.05 |
| E2 | GY  | 4A | AX.89430756 | 7.24E+08 | 0.06 | -4.62 | 3.75 | 0.05 |
| E2 | GY  | 4A | AX.89382815 | 7.25E+08 | 0.09 | -5.24 | 6.78 | 0.10 |
| E2 | GY  | 4A | AX.89382815 | 7.25E+08 | 0.09 | -5.24 | 6.78 | 0.10 |
| E2 | GY  | 4A | AX.89326464 | 7.17E+08 | 0.07 | -3.94 | 3.57 | 0.05 |
| E2 | GY  | 4A | AX.89326464 | 7.17E+08 | 0.07 | -3.94 | 3.57 | 0.05 |
| E2 | GY  | 4A | AX.89464835 | 1.48E+08 | 0.19 | -2.55 | 3.35 | 0.04 |
| E2 | GY  | 4A | AX.89464835 | 1.48E+08 | 0.19 | -2.55 | 3.35 | 0.04 |
| E2 | GY  | 4A | AX.89752763 | 7.21E+08 | 0.15 | -2.66 | 3.14 | 0.05 |
| E2 | GY  | 4A | AX.89752763 | 7.21E+08 | 0.15 | -2.66 | 3.14 | 0.05 |
| E2 | GY  | 4A | AX.89336841 | 7.25E+08 | 0.07 | -4.53 | 4.31 | 0.06 |
| E2 | GY  | 4A | AX.89643739 | 7.24E+08 | 0.07 | -4.83 | 4.58 | 0.06 |
| E2 | GY  | 4A | AX.89643739 | 7.24E+08 | 0.07 | -4.83 | 4.58 | 0.06 |
| E2 | GY  | 4A | AX.89327236 | 7.20E+08 | 0.18 | -2.76 | 3.76 | 0.06 |
| E2 | GY  | 4A | AX.89327236 | 7.20E+08 | 0.18 | -2.76 | 3.76 | 0.06 |
| E2 | GY  | 4A | AX.89608614 | 7.26E+08 | 0.07 | -4.54 | 4.37 | 0.06 |
| E2 | GY  | 4A | AX.89608614 | 7.26E+08 | 0.07 | -4.54 | 4.37 | 0.06 |
| E2 | GY  | 4A | AX.89361375 | 7.21E+08 | 0.13 | -3.10 | 3.76 | 0.06 |
| E2 | GY  | 4A | AX.89361375 | 7.21E+08 | 0.13 | -3.10 | 3.76 | 0.06 |
| E2 | GY  | 4A | AX.89514865 | 7.20E+08 | 0.15 | -2.76 | 3.29 | 0.05 |
| E2 | GY  | 4A | AX.89514865 | 7.20E+08 | 0.15 | -2.76 | 3.29 | 0.05 |
| E2 | GPS | 4A | AX.89375980 | 5.45E+08 | 0.33 | 1.49  | 3.34 | 0.06 |
| E2 | GY  | 4A | AX.89766987 | 7.33E+08 | 0.13 | -3.18 | 3.73 | 0.04 |
| E2 | GY  | 4A | AX.89766987 | 7.33E+08 | 0.13 | -3.18 | 3.73 | 0.04 |
| E2 | GY  | 4A | AX.89479076 | 6.07E+07 | 0.11 | -3.18 | 3.26 | 0.04 |
| E2 | GY  | 4A | AX.89479076 | 6.07E+07 | 0.11 | -3.18 | 3.26 | 0.04 |
| E2 | GY  | 4A | AX.89681679 | 7.19E+08 | 0.24 | -2.49 | 3.75 | 0.06 |
| E2 | GY  | 4A | AX.89681679 | 7.19E+08 | 0.24 | -2.49 | 3.75 | 0.06 |
| E2 | GY  | 4A | AX.89328332 | 7.39E+08 | 0.11 | -3.11 | 3.12 | 0.04 |
| E2 | GPS | 4A | AX.89738697 | 5.44E+08 | 0.33 | 1.50  | 3.41 | 0.06 |

|    |     |    |             |          |      |       |      |      |
|----|-----|----|-------------|----------|------|-------|------|------|
| E2 | GY  | 4A | AX.89398873 | 7.21E+08 | 0.05 | -5.30 | 4.42 | 0.06 |
| E2 | GY  | 4A | AX.89398873 | 7.21E+08 | 0.05 | -5.30 | 4.42 | 0.06 |
| E2 | GY  | 4A | AX.89755668 | 5.95E+07 | 0.08 | -3.38 | 3.02 | 0.04 |
| E2 | GY  | 4A | AX.89329174 | 7.22E+08 | 0.18 | -3.01 | 4.31 | 0.07 |
| E2 | GY  | 4A | AX.89729045 | 7.33E+08 | 0.07 | -4.11 | 3.63 | 0.04 |
| E2 | GPS | 4A | AX.89763642 | 5.67E+08 | 0.45 | 1.35  | 3.09 | 0.06 |
| E2 | GY  | 4A | AX.89400490 | 7.24E+08 | 0.06 | -4.62 | 3.75 | 0.05 |
| E2 | GY  | 4A | AX.89423999 | 7.24E+08 | 0.06 | -4.92 | 4.13 | 0.06 |
| E2 | GY  | 4A | AX.89330373 | 7.26E+08 | 0.11 | -3.28 | 3.45 | 0.05 |
| E2 | GY  | 4A | AX.89401350 | 7.21E+08 | 0.15 | -2.66 | 3.14 | 0.05 |
| E2 | GY  | 4A | AX.89722710 | 7.26E+08 | 0.13 | -3.18 | 3.67 | 0.05 |
| E2 | GY  | 4A | AX.89746453 | 7.21E+08 | 0.17 | -2.66 | 3.40 | 0.06 |
| E2 | GY  | 4A | AX.89703146 | 7.22E+08 | 0.16 | -2.64 | 3.18 | 0.05 |
| E2 | GY  | 4A | AX.89727342 | 7.23E+08 | 0.06 | -4.05 | 3.18 | 0.04 |
| E2 | GY  | 4A | AX.89710159 | 7.24E+08 | 0.07 | -4.22 | 4.00 | 0.05 |
| E2 | GY  | 4A | AX.89592533 | 7.26E+08 | 0.10 | -3.21 | 3.19 | 0.04 |
| E2 | GY  | 4A | AX.89760308 | 7.21E+08 | 0.17 | -2.94 | 3.97 | 0.07 |
| E2 | GPS | 4A | AX.89452428 | 5.95E+08 | 0.35 | 1.55  | 3.67 | 0.06 |
| E2 | GY  | 4A | AX.89625179 | 7.22E+08 | 0.17 | -2.94 | 3.97 | 0.07 |
| E2 | GY  | 4A | AX.89367424 | 7.22E+08 | 0.17 | -2.92 | 4.01 | 0.07 |
| E2 | GY  | 4A | AX.89332687 | 7.34E+08 | 0.40 | -2.07 | 3.42 | 0.07 |
| E2 | GY  | 4A | AX.89748469 | 7.21E+08 | 0.17 | -2.66 | 3.40 | 0.06 |
| E2 | GY  | 4A | AX.89711147 | 7.39E+08 | 0.18 | -2.73 | 3.66 | 0.05 |
| E2 | GY  | 4A | AX.89711147 | 7.39E+08 | 0.18 | -2.73 | 3.66 | 0.05 |
| E2 | GY  | 4A | AX.89704631 | 7.26E+08 | 0.13 | -3.82 | 5.21 | 0.08 |
| E2 | GY  | 4A | AX.89778290 | 7.24E+08 | 0.06 | -4.05 | 3.18 | 0.04 |
| E2 | GY  | 4A | AX.89778290 | 7.24E+08 | 0.06 | -4.05 | 3.18 | 0.04 |
| E2 | GY  | 4A | AX.89333298 | 7.26E+08 | 0.13 | -3.18 | 3.67 | 0.05 |
| E2 | GPS | 4A | AX.89327978 | 5.94E+08 | 0.42 | 1.48  | 3.60 | 0.06 |
| E2 | GPS | 4A | AX.89323805 | 5.95E+08 | 0.34 | 1.69  | 4.21 | 0.07 |
| E2 | GY  | 4A | AX.89709003 | 7.43E+08 | 0.09 | -3.29 | 3.01 | 0.04 |
| E2 | GY  | 4A | AX.89404144 | 7.20E+08 | 0.19 | -2.71 | 3.70 | 0.06 |
| E2 | GPS | 4A | AX.89333453 | 5.45E+08 | 0.33 | 1.49  | 3.34 | 0.06 |
| E2 | GY  | 4A | AX.89369165 | 7.22E+08 | 0.16 | -3.05 | 4.07 | 0.07 |
| E2 | GY  | 4A | AX.89369165 | 7.22E+08 | 0.16 | -3.05 | 4.07 | 0.07 |
| E2 | GY  | 4A | AX.89486973 | 7.18E+08 | 0.24 | -2.30 | 3.25 | 0.05 |
| E2 | GY  | 4A | AX.89404874 | 7.25E+08 | 0.16 | -2.93 | 3.83 | 0.05 |
| E2 | GY  | 4A | AX.89404874 | 7.25E+08 | 0.16 | -2.93 | 3.83 | 0.05 |
| E2 | GPS | 4A | AX.89329894 | 5.45E+08 | 0.33 | 1.49  | 3.34 | 0.06 |
| E2 | GY  | 4A | AX.89639515 | 7.24E+08 | 0.07 | -4.12 | 3.67 | 0.05 |
| E2 | GY  | 4A | AX.89775815 | 7.24E+08 | 0.07 | -4.83 | 4.58 | 0.06 |
| E2 | GY  | 4A | AX.89369902 | 7.20E+08 | 0.17 | -2.94 | 3.97 | 0.07 |
| E2 | GY  | 4A | AX.89369902 | 7.20E+08 | 0.17 | -2.94 | 3.97 | 0.07 |
| E2 | GY  | 4A | AX.89666696 | 7.43E+08 | 0.10 | -3.19 | 3.07 | 0.04 |
| E2 | TKW | 4A | AX.89565646 | 7.43E+08 | 0.21 | -1.26 | 3.85 | 0.07 |
| E2 | GPS | 4A | AX.89511314 | 5.67E+08 | 0.45 | 1.35  | 3.09 | 0.06 |
| E2 | GY  | 4A | AX.89462896 | 7.39E+08 | 0.08 | -3.63 | 3.30 | 0.04 |
| E2 | GPS | 4A | AX.89514281 | 5.71E+08 | 0.31 | 1.70  | 4.06 | 0.07 |
| E2 | GY  | 4A | AX.89618055 | 7.25E+08 | 0.08 | -4.54 | 4.79 | 0.07 |
| E2 | GY  | 4A | AX.89608513 | 3.28E+08 | 0.11 | -3.00 | 3.05 | 0.04 |



|    |     |    |             |          |      |       |      |      |
|----|-----|----|-------------|----------|------|-------|------|------|
| E2 | GPS | 4A | AX.89651803 | 5.46E+08 | 0.33 | 1.49  | 3.34 | 0.06 |
| E2 | TKW | 4A | AX.89622319 | 7.41E+08 | 0.26 | -1.04 | 3.20 | 0.05 |
| E2 | GPS | 4A | AX.89533645 | 5.95E+08 | 0.42 | 1.35  | 3.08 | 0.04 |
| E2 | GPS | 4A | AX.89606898 | 5.67E+08 | 0.45 | 1.35  | 3.09 | 0.06 |
| E2 | GY  | 4A | AX.89347361 | 7.24E+08 | 0.06 | -4.05 | 3.18 | 0.04 |
| E2 | GPS | 4A | AX.89630921 | 5.44E+08 | 0.34 | 1.47  | 3.29 | 0.06 |
| E2 | GPS | 4A | AX.89334966 | 5.45E+08 | 0.33 | 1.43  | 3.11 | 0.06 |
| E2 | TKW | 4A | AX.89561620 | 6.04E+08 | 0.39 | -0.96 | 3.28 | 0.06 |
| E2 | GPS | 4A | AX.89665310 | 5.52E+08 | 0.33 | 1.65  | 3.98 | 0.07 |
| E2 | GY  | 4A | AX.89450476 | 7.26E+08 | 0.11 | -4.41 | 5.79 | 0.09 |
| E2 | GY  | 4A | AX.89450476 | 7.26E+08 | 0.11 | -4.41 | 5.79 | 0.09 |
| E2 | GPS | 4A | AX.89724741 | 5.95E+08 | 0.42 | 1.35  | 3.08 | 0.04 |
| E2 | GY  | 4A | AX.89663455 | 7.22E+08 | 0.17 | -2.85 | 3.84 | 0.06 |
| E2 | GY  | 4A | AX.89663455 | 7.22E+08 | 0.17 | -2.85 | 3.84 | 0.06 |
| E2 | GPS | 4A | AX.89639961 | 6.04E+08 | 0.45 | -1.53 | 3.88 | 0.06 |
| E2 | GPS | 4A | AX.89389750 | 5.95E+08 | 0.35 | 1.55  | 3.67 | 0.06 |
| E2 | GPS | 4A | AX.89584905 | 5.45E+08 | 0.33 | 1.43  | 3.11 | 0.06 |
| E2 | GPS | 4A | AX.89537438 | 5.50E+08 | 0.34 | 1.39  | 3.01 | 0.05 |
| E2 | GPS | 4A | AX.89673844 | 5.67E+08 | 0.45 | 1.35  | 3.09 | 0.06 |
| E2 | GPS | 4A | AX.89768355 | 5.95E+08 | 0.42 | 1.35  | 3.08 | 0.04 |
| E2 | GPS | 4A | AX.89520114 | 5.67E+08 | 0.45 | 1.35  | 3.09 | 0.06 |
| E2 | GY  | 4A | AX.89373580 | 2.24E+08 | 0.11 | -3.00 | 3.05 | 0.04 |
| E2 | GY  | 4A | AX.89409546 | 7.23E+08 | 0.06 | -4.05 | 3.18 | 0.04 |
| E2 | GPS | 4A | AX.89443410 | 5.66E+08 | 0.45 | 1.35  | 3.09 | 0.06 |
| E2 | GPS | 4A | AX.89551317 | 5.95E+08 | 0.35 | 1.55  | 3.67 | 0.06 |
| E2 | GPS | 4A | AX.89501788 | 5.42E+08 | 0.30 | 1.46  | 3.08 | 0.05 |
| E2 | GY  | 4A | AX.89526893 | 7.24E+08 | 0.06 | -4.68 | 4.08 | 0.06 |
| E2 | GPS | 4A | AX.89377059 | 5.45E+08 | 0.33 | 1.49  | 3.34 | 0.06 |
| E2 | GY  | 4A | AX.89548890 | 7.25E+08 | 0.11 | -3.34 | 3.64 | 0.05 |
| E2 | GPS | 4A | AX.89604256 | 5.50E+08 | 0.33 | 1.59  | 3.73 | 0.07 |
| E2 | GPS | 4A | AX.89650725 | 5.62E+08 | 0.45 | 1.33  | 3.01 | 0.06 |
| E2 | GPS | 4A | AX.89421235 | 5.95E+08 | 0.35 | 1.55  | 3.67 | 0.06 |
| E2 | GPS | 4A | AX.89739123 | 5.44E+08 | 0.33 | 1.50  | 3.41 | 0.06 |
| E2 | GPS | 4A | AX.89591615 | 5.95E+08 | 0.35 | 1.55  | 3.67 | 0.06 |
| E2 | GY  | 4A | AX.89452318 | 7.23E+08 | 0.06 | -4.62 | 3.75 | 0.05 |
| E2 | GY  | 4A | AX.89565539 | 7.19E+08 | 0.22 | -2.57 | 3.74 | 0.06 |
| E2 | GY  | 4A | AX.89565539 | 7.19E+08 | 0.22 | -2.57 | 3.74 | 0.06 |
| E2 | GY  | 4A | AX.89516106 | 7.24E+08 | 0.19 | -2.42 | 3.06 | 0.04 |
| E2 | GY  | 4A | AX.89516106 | 7.24E+08 | 0.19 | -2.42 | 3.06 | 0.04 |
| E2 | GY  | 4A | AX.89777958 | 7.24E+08 | 0.07 | -4.43 | 3.93 | 0.05 |
| E2 | GPS | 4A | AX.89673466 | 5.50E+08 | 0.33 | 1.65  | 3.98 | 0.07 |
| E2 | GY  | 4A | AX.89422048 | 7.31E+08 | 0.20 | -2.44 | 3.18 | 0.04 |
| E2 | GPS | 4A | AX.89473367 | 5.95E+08 | 0.35 | 1.55  | 3.67 | 0.06 |
| E2 | GY  | 4A | AX.89777038 | 7.26E+08 | 0.15 | -2.88 | 3.50 | 0.05 |
| E2 | GY  | 4A | AX.89777038 | 7.26E+08 | 0.15 | -2.88 | 3.50 | 0.05 |
| E2 | GY  | 4A | AX.89695704 | 7.21E+08 | 0.07 | -3.67 | 3.12 | 0.05 |
| E2 | GY  | 4A | AX.89695704 | 7.21E+08 | 0.07 | -3.67 | 3.12 | 0.05 |
| E2 | TKW | 4A | AX.89568764 | 7.43E+08 | 0.20 | -1.15 | 3.24 | 0.05 |
| E2 | GPS | 4A | AX.89573595 | 5.45E+08 | 0.33 | 1.49  | 3.34 | 0.06 |
| E2 | GPS | 4A | AX.89639038 | 5.66E+08 | 0.42 | 1.46  | 3.53 | 0.07 |

|    |     |    |             |          |      |       |      |      |
|----|-----|----|-------------|----------|------|-------|------|------|
| E2 | TKW | 4A | AX.89637968 | 7.41E+08 | 0.35 | -1.12 | 4.17 | 0.07 |
| E2 | GPS | 4A | AX.89505471 | 5.52E+08 | 0.33 | 1.65  | 3.98 | 0.07 |
| E2 | GPS | 4A | AX.89376001 | 5.45E+08 | 0.33 | 1.43  | 3.11 | 0.06 |
| E2 | GY  | 4A | AX.89487527 | 7.33E+08 | 0.13 | -2.86 | 3.11 | 0.04 |
| E2 | GY  | 4A | AX.89487527 | 7.33E+08 | 0.13 | -2.86 | 3.11 | 0.04 |
| E2 | GPS | 4A | AX.89570818 | 5.95E+08 | 0.35 | 1.55  | 3.67 | 0.06 |
| E2 | GPS | 4A | AX.89606973 | 5.45E+08 | 0.33 | 1.43  | 3.11 | 0.06 |
| E2 | GPS | 4A | AX.89489530 | 5.44E+08 | 0.34 | 1.47  | 3.29 | 0.06 |
| E2 | GPS | 4A | AX.89327806 | 6.04E+08 | 0.34 | 1.47  | 3.31 | 0.05 |
| E2 | GPS | 4A | AX.89583512 | 5.67E+08 | 0.44 | 1.47  | 3.57 | 0.07 |
| E2 | GPS | 4A | AX.89741774 | 5.94E+08 | 0.42 | 1.48  | 3.60 | 0.06 |
| E2 | GPS | 4A | AX.89733776 | 5.66E+08 | 0.45 | 1.35  | 3.09 | 0.06 |
| E2 | GPS | 4A | AX.89408916 | 5.45E+08 | 0.33 | 1.49  | 3.34 | 0.06 |
| E2 | GY  | 4A | AX.89595328 | 7.33E+08 | 0.15 | -2.74 | 3.20 | 0.04 |
| E2 | GY  | 4A | AX.89595328 | 7.33E+08 | 0.15 | -2.74 | 3.20 | 0.04 |
| E2 | GY  | 4A | AX.89670415 | 7.22E+08 | 0.17 | -2.94 | 3.97 | 0.07 |
| E2 | GPS | 4A | AX.89591247 | 5.51E+08 | 0.30 | 1.47  | 3.10 | 0.06 |
| E2 | GPS | 4A | AX.89465166 | 5.95E+08 | 0.42 | 1.35  | 3.08 | 0.04 |
| E2 | GPS | 4A | AX.89694564 | 5.45E+08 | 0.33 | 1.49  | 3.34 | 0.06 |
| E2 | GPS | 4A | AX.89486050 | 5.45E+08 | 0.33 | 1.43  | 3.11 | 0.06 |
| E2 | GPS | 4A | AX.89714181 | 5.46E+08 | 0.33 | 1.49  | 3.34 | 0.06 |
| E2 | GY  | 4A | AX.89771229 | 7.20E+08 | 0.18 | -2.56 | 3.26 | 0.05 |
| E2 | GY  | 4A | AX.89771229 | 7.20E+08 | 0.18 | -2.56 | 3.26 | 0.05 |
| E2 | GPS | 4A | AX.89413506 | 5.67E+08 | 0.45 | 1.35  | 3.09 | 0.06 |
| E2 | GY  | 4A | AX.89746453 | 7.21E+08 | 0.17 | -2.66 | 3.40 | 0.06 |
| E2 | GY  | 4A | AX.89342418 | 7.18E+08 | 0.22 | -2.29 | 3.10 | 0.05 |
| E2 | GY  | 4A | AX.89342418 | 7.18E+08 | 0.22 | -2.29 | 3.10 | 0.05 |
| E2 | GY  | 4A | AX.89698306 | 7.14E+08 | 0.09 | -3.24 | 3.08 | 0.04 |
| E2 | GY  | 4A | AX.89698306 | 7.14E+08 | 0.09 | -3.24 | 3.08 | 0.04 |
| E2 | GY  | 4A | AX.89576142 | 7.21E+08 | 0.15 | -2.66 | 3.14 | 0.05 |
| E2 | GPS | 4A | AX.89546298 | 5.45E+08 | 0.33 | 1.49  | 3.34 | 0.06 |
| E2 | GPS | 4A | AX.89672169 | 5.46E+08 | 0.32 | 1.61  | 3.77 | 0.07 |
| E2 | GPS | 4A | AX.89677528 | 5.45E+08 | 0.33 | 1.49  | 3.34 | 0.06 |
| E2 | GPS | 4A | AX.89522052 | 5.66E+08 | 0.45 | 1.35  | 3.09 | 0.06 |
| E2 | GPS | 4A | AX.89762751 | 5.49E+08 | 0.34 | 1.45  | 3.23 | 0.06 |
| E2 | GPS | 4A | AX.89583948 | 5.45E+08 | 0.33 | 1.49  | 3.34 | 0.06 |
| E2 | GY  | 4A | AX.89710159 | 7.24E+08 | 0.07 | -4.22 | 4.00 | 0.05 |
| E2 | GY  | 4A | AX.89450913 | 7.27E+08 | 0.16 | -2.86 | 3.58 | 0.05 |
| E2 | GY  | 4A | AX.89772769 | 7.22E+08 | 0.17 | -2.94 | 3.97 | 0.07 |
| E2 | GY  | 4A | AX.89772769 | 7.22E+08 | 0.17 | -2.94 | 3.97 | 0.07 |
| E2 | GPS | 4A | AX.89579142 | 5.45E+08 | 0.33 | 1.43  | 3.11 | 0.06 |
| E2 | GPS | 4A | AX.89677350 | 5.40E+08 | 0.31 | 1.52  | 3.38 | 0.06 |
| E2 | GPS | 4A | AX.89774414 | 5.45E+08 | 0.33 | 1.49  | 3.34 | 0.06 |
| E2 | GY  | 4A | AX.89566336 | 7.27E+08 | 0.16 | -2.80 | 3.47 | 0.05 |
| E2 | GPS | 4A | AX.89324371 | 5.45E+08 | 0.33 | 1.49  | 3.34 | 0.06 |
| E2 | GPS | 4A | AX.89697610 | 5.45E+08 | 0.33 | 1.49  | 3.34 | 0.06 |
| E2 | GY  | 4A | AX.89712404 | 7.20E+08 | 0.17 | -2.84 | 3.81 | 0.06 |
| E2 | GY  | 4A | AX.89712404 | 7.20E+08 | 0.17 | -2.84 | 3.81 | 0.06 |
| E2 | GY  | 4A | AX.89623044 | 7.31E+08 | 0.20 | -2.44 | 3.18 | 0.04 |
| E2 | GY  | 4A | AX.89623044 | 7.31E+08 | 0.20 | -2.44 | 3.18 | 0.04 |

|    |     |    |             |          |      |       |      |      |
|----|-----|----|-------------|----------|------|-------|------|------|
| E2 | GPS | 4A | AX.89557092 | 5.45E+08 | 0.33 | 1.49  | 3.34 | 0.06 |
| E2 | GPS | 4A | AX.89474655 | 5.44E+08 | 0.33 | 1.52  | 3.47 | 0.06 |
| E2 | GPS | 4A | AX.89378527 | 5.45E+08 | 0.33 | 1.49  | 3.34 | 0.06 |
| E2 | GY  | 4A | AX.89637945 | 7.26E+08 | 0.14 | -3.77 | 5.48 | 0.08 |
| E2 | GY  | 4A | AX.89637945 | 7.26E+08 | 0.14 | -3.77 | 5.48 | 0.08 |
| E2 | GPS | 4A | AX.89452039 | 5.44E+08 | 0.34 | 1.47  | 3.29 | 0.06 |
| E2 | GPS | 4A | AX.89611642 | 5.66E+08 | 0.45 | 1.35  | 3.09 | 0.06 |
| E2 | GPS | 4A | AX.89709809 | 5.46E+08 | 0.33 | 1.49  | 3.34 | 0.06 |
| E2 | GY  | 4A | AX.89586918 | 7.28E+08 | 0.15 | -3.08 | 3.93 | 0.05 |
| E2 | GPS | 4A | AX.89519994 | 5.95E+08 | 0.42 | 1.35  | 3.08 | 0.04 |
| E2 | GY  | 4A | AX.89591500 | 7.27E+08 | 0.18 | -2.78 | 3.67 | 0.05 |
| E2 | GY  | 4A | AX.89591500 | 7.27E+08 | 0.18 | -2.78 | 3.67 | 0.05 |
| E2 | GY  | 4A | AX.89486973 | 7.18E+08 | 0.24 | -2.30 | 3.25 | 0.05 |
| E2 | GY  | 4A | AX.89593836 | 7.16E+08 | 0.08 | -3.50 | 3.05 | 0.04 |
| E2 | GPS | 4A | AX.89349938 | 5.45E+08 | 0.33 | 1.49  | 3.34 | 0.06 |
| E2 | GY  | 4A | AX.89555897 | 7.19E+08 | 0.20 | -2.41 | 3.11 | 0.05 |
| E2 | GY  | 4A | AX.89555897 | 7.19E+08 | 0.20 | -2.41 | 3.11 | 0.05 |
| E2 | GPS | 4A | AX.89735458 | 5.66E+08 | 0.45 | 1.35  | 3.09 | 0.06 |
| E2 | GPS | 4A | AX.89344398 | 5.66E+08 | 0.45 | 1.35  | 3.09 | 0.06 |
| E2 | GPS | 4A | AX.89491129 | 5.67E+08 | 0.45 | 1.35  | 3.09 | 0.06 |
| E2 | GY  | 4A | AX.89498055 | 7.28E+08 | 0.10 | -3.46 | 3.53 | 0.04 |
| E2 | GY  | 4A | AX.89498055 | 7.28E+08 | 0.10 | -3.46 | 3.53 | 0.04 |
| E2 | GPS | 4A | AX.89643263 | 5.66E+08 | 0.45 | 1.35  | 3.09 | 0.06 |
| E2 | GY  | 4A | AX.89775815 | 7.24E+08 | 0.07 | -4.83 | 4.58 | 0.06 |
| E2 | GPS | 4A | AX.89326818 | 5.45E+08 | 0.33 | 1.49  | 3.34 | 0.06 |
| E2 | GPS | 4A | AX.89612424 | 5.45E+08 | 0.33 | 1.49  | 3.34 | 0.06 |
| E2 | GPS | 4A | AX.89536982 | 5.45E+08 | 0.33 | 1.43  | 3.11 | 0.06 |
| E2 | GY  | 4A | AX.89462896 | 7.39E+08 | 0.08 | -3.63 | 3.30 | 0.04 |
| E2 | GPS | 4A | AX.89727870 | 5.62E+08 | 0.44 | 1.40  | 3.29 | 0.06 |
| E2 | GY  | 4A | AX.89618055 | 7.25E+08 | 0.08 | -4.54 | 4.79 | 0.07 |
| E2 | GY  | 4A | AX.89608513 | 3.28E+08 | 0.11 | -3.00 | 3.05 | 0.04 |
| E2 | GY  | 4A | AX.89524087 | 6.07E+07 | 0.20 | -2.42 | 3.22 | 0.05 |
| E2 | GY  | 4A | AX.89524087 | 6.07E+07 | 0.20 | -2.42 | 3.22 | 0.05 |
| E2 | GY  | 4A | AX.89680753 | 7.26E+08 | 0.14 | -3.80 | 5.43 | 0.08 |
| E2 | GY  | 4A | AX.89680753 | 7.26E+08 | 0.14 | -3.80 | 5.43 | 0.08 |
| E2 | GPS | 4A | AX.89752156 | 5.95E+08 | 0.35 | 1.44  | 3.24 | 0.05 |
| E2 | GPS | 4A | AX.89598367 | 5.95E+08 | 0.35 | 1.55  | 3.67 | 0.06 |
| E2 | GY  | 4A | AX.89347361 | 7.24E+08 | 0.06 | -4.05 | 3.18 | 0.04 |
| E2 | GPS | 4A | AX.89504124 | 5.38E+08 | 0.31 | 1.52  | 3.38 | 0.06 |
| E2 | GPS | 4A | AX.89628375 | 6.13E+08 | 0.23 | -1.65 | 3.29 | 0.06 |
| E2 | GPS | 4A | AX.89435121 | 5.45E+08 | 0.33 | 1.49  | 3.34 | 0.06 |
| E2 | GPS | 4A | AX.89557393 | 5.45E+08 | 0.33 | 1.43  | 3.11 | 0.06 |
| E2 | GPS | 4A | AX.89637306 | 5.46E+08 | 0.33 | 1.49  | 3.34 | 0.06 |
| E2 | GPS | 4A | AX.89414093 | 5.77E+08 | 0.36 | 1.39  | 3.05 | 0.06 |
| E2 | GY  | 4A | AX.89347832 | 7.22E+08 | 0.17 | -2.94 | 3.97 | 0.07 |
| E2 | GY  | 4A | AX.89347832 | 7.22E+08 | 0.17 | -2.94 | 3.97 | 0.07 |
| E2 | GPS | 4A | AX.89329697 | 5.95E+08 | 0.36 | 1.46  | 3.33 | 0.05 |
| E2 | TKW | 4A | AX.89338338 | 7.43E+08 | 0.21 | -1.26 | 3.85 | 0.07 |
| E2 | GPS | 4A | AX.89330631 | 5.45E+08 | 0.33 | 1.49  | 3.34 | 0.06 |
| E2 | TKW | 4A | AX.89417560 | 6.04E+08 | 0.44 | -0.94 | 3.28 | 0.06 |

|    |     |    |             |          |      |       |      |      |
|----|-----|----|-------------|----------|------|-------|------|------|
| E2 | GY  | 4A | AX.89391456 | 7.20E+08 | 0.19 | -2.71 | 3.70 | 0.06 |
| E2 | GY  | 4A | AX.89391456 | 7.20E+08 | 0.19 | -2.71 | 3.70 | 0.06 |
| E2 | GPS | 4A | AX.89715936 | 5.45E+08 | 0.33 | 1.49  | 3.34 | 0.06 |
| E2 | GPS | 4A | AX.89522378 | 5.44E+08 | 0.34 | 1.57  | 3.72 | 0.07 |
| E2 | GY  | 4A | AX.89559764 | 7.22E+08 | 0.17 | -2.94 | 3.97 | 0.07 |
| E2 | GY  | 4A | AX.89559764 | 7.22E+08 | 0.17 | -2.94 | 3.97 | 0.07 |
| E2 | GY  | 4A | AX.89593836 | 7.16E+08 | 0.08 | -3.50 | 3.05 | 0.04 |
| E2 | GY  | 4A | AX.89755912 | 7.33E+08 | 0.14 | -3.24 | 4.05 | 0.05 |
| E2 | GY  | 4A | AX.89755912 | 7.33E+08 | 0.14 | -3.24 | 4.05 | 0.05 |
| E2 | GY  | 4A | AX.89578493 | 7.20E+08 | 0.17 | -2.84 | 3.81 | 0.06 |
| E2 | GY  | 4A | AX.89578493 | 7.20E+08 | 0.17 | -2.84 | 3.81 | 0.06 |
| E2 | GY  | 4A | AX.89767319 | 7.24E+08 | 0.06 | -4.05 | 3.18 | 0.04 |
| E2 | GY  | 4A | AX.89767319 | 7.24E+08 | 0.06 | -4.05 | 3.18 | 0.04 |
| E2 | GY  | 4A | AX.89385754 | 7.17E+08 | 0.08 | -3.48 | 3.03 | 0.04 |
| E2 | GY  | 4A | AX.89385754 | 7.17E+08 | 0.08 | -3.48 | 3.03 | 0.04 |
| E2 | GY  | 4A | AX.89777958 | 7.24E+08 | 0.07 | -4.43 | 3.93 | 0.05 |
| E2 | GY  | 4A | AX.89422048 | 7.31E+08 | 0.20 | -2.44 | 3.18 | 0.04 |
| E2 | GPS | 4A | AX.89666003 | 5.91E+08 | 0.27 | 1.60  | 3.44 | 0.06 |
| E2 | GPS | 4A | AX.89617814 | 5.46E+08 | 0.33 | 1.49  | 3.34 | 0.06 |
| E2 | GY  | 4A | AX.89651575 | 7.24E+08 | 0.07 | -4.83 | 4.58 | 0.06 |
| E2 | GY  | 4A | AX.89651575 | 7.24E+08 | 0.07 | -4.83 | 4.58 | 0.06 |
| E2 | GY  | 4A | AX.89704157 | 7.25E+08 | 0.12 | -3.59 | 4.39 | 0.07 |
| E2 | GY  | 4A | AX.89704157 | 7.25E+08 | 0.12 | -3.59 | 4.39 | 0.07 |
| E2 | TKW | 4A | AX.89395605 | 6.04E+08 | 0.44 | -0.94 | 3.28 | 0.06 |
| E2 | GPS | 4A | AX.89509866 | 5.45E+08 | 0.33 | 1.49  | 3.34 | 0.06 |
| E2 | GY  | 4A | AX.89729045 | 7.33E+08 | 0.07 | -4.11 | 3.63 | 0.04 |
| E2 | TKW | 4A | AX.89375502 | 7.40E+08 | 0.17 | -1.19 | 3.06 | 0.05 |
| E2 | GY  | 4A | AX.89712068 | 7.24E+08 | 0.07 | -4.83 | 4.58 | 0.06 |
| E2 | GY  | 4A | AX.89709003 | 7.43E+08 | 0.09 | -3.29 | 3.01 | 0.04 |
| E2 | GY  | 4A | AX.89670415 | 7.22E+08 | 0.17 | -2.94 | 3.97 | 0.07 |
| E2 | GPS | 4A | AX.89511230 | 5.45E+08 | 0.33 | 1.43  | 3.11 | 0.06 |
| E2 | GY  | 4A | AX.89722710 | 7.26E+08 | 0.13 | -3.18 | 3.67 | 0.05 |
| E2 | GPS | 4A | AX.89687879 | 5.95E+08 | 0.42 | 1.35  | 3.08 | 0.04 |
| E2 | GY  | 4A | AX.89636320 | 7.20E+08 | 0.18 | -2.46 | 3.09 | 0.05 |
| E2 | GY  | 4A | AX.89636320 | 7.20E+08 | 0.18 | -2.46 | 3.09 | 0.05 |
| E2 | TKW | 4A | AX.89661925 | 6.04E+08 | 0.39 | -0.96 | 3.28 | 0.06 |
| E2 | TKW | 4A | AX.89332213 | 7.41E+08 | 0.35 | -0.99 | 3.40 | 0.06 |
| E2 | GY  | 4A | AX.89576142 | 7.21E+08 | 0.15 | -2.66 | 3.14 | 0.05 |
| E2 | GY  | 4A | AX.89664678 | 7.28E+08 | 0.15 | -2.78 | 3.29 | 0.04 |
| E2 | GY  | 4A | AX.89664678 | 7.28E+08 | 0.15 | -2.78 | 3.29 | 0.04 |
| E2 | TKW | 4A | AX.89497176 | 7.40E+08 | 0.34 | -0.96 | 3.13 | 0.05 |
| E2 | GY  | 4A | AX.89450913 | 7.27E+08 | 0.16 | -2.86 | 3.58 | 0.05 |
| E2 | TKW | 4A | AX.89323121 | 7.34E+08 | 0.08 | -1.69 | 3.04 | 0.05 |
| E2 | GPS | 4A | AX.89578201 | 5.45E+08 | 0.33 | 1.43  | 3.11 | 0.06 |
| E2 | GY  | 4A | AX.89566336 | 7.27E+08 | 0.16 | -2.80 | 3.47 | 0.05 |
| E2 | GY  | 4A | AX.89436017 | 7.25E+08 | 0.06 | -4.62 | 3.75 | 0.05 |
| E2 | GPS | 4A | AX.89699003 | 5.95E+08 | 0.35 | 1.55  | 3.67 | 0.06 |
| E2 | TKW | 4A | AX.89690364 | 7.40E+08 | 0.36 | -1.05 | 3.76 | 0.06 |
| E2 | GY  | 4A | AX.89748469 | 7.21E+08 | 0.17 | -2.66 | 3.40 | 0.06 |
| E2 | GPS | 4A | AX.89547232 | 5.46E+08 | 0.33 | 1.66  | 4.02 | 0.07 |

|    |      |    |             |          |      |        |      |      |
|----|------|----|-------------|----------|------|--------|------|------|
| E2 | GY   | 4A | AX.89712068 | 7.24E+08 | 0.07 | -4.83  | 4.58 | 0.06 |
| E2 | GY   | 4A | AX.89586918 | 7.28E+08 | 0.15 | -3.08  | 3.93 | 0.05 |
| E2 | GPM2 | 4A | AX.89529538 | 6.04E+08 | 0.34 | 604.67 | 3.95 | 0.08 |
| E2 | GY   | 4A | AX.89501499 | 7.26E+08 | 0.15 | -2.82  | 3.38 | 0.04 |
| E2 | GPM2 | 4A | AX.89600862 | 6.04E+08 | 0.32 | 569.05 | 3.47 | 0.07 |
| E2 | GY   | 4A | AX.89432804 | 7.25E+08 | 0.13 | -3.43  | 4.18 | 0.06 |
| E2 | GY   | 4A | AX.89432804 | 7.25E+08 | 0.13 | -3.43  | 4.18 | 0.06 |
| E2 | GPS  | 4A | AX.89761832 | 5.45E+08 | 0.33 | 1.49   | 3.34 | 0.06 |
| E2 | GY   | 4A | AX.89628286 | 7.20E+08 | 0.18 | -2.74  | 3.65 | 0.06 |
| E2 | GY   | 4A | AX.89628286 | 7.20E+08 | 0.18 | -2.74  | 3.65 | 0.06 |
| E2 | GPS  | 4A | AX.89517100 | 5.95E+08 | 0.36 | 1.48   | 3.44 | 0.06 |
| E2 | GY   | 4A | AX.89534997 | 7.26E+08 | 0.18 | -2.54  | 3.12 | 0.04 |
| E2 | GY   | 4A | AX.89534997 | 7.26E+08 | 0.18 | -2.54  | 3.12 | 0.04 |
| E2 | GPS  | 4A | AX.89687555 | 5.45E+08 | 0.33 | 1.49   | 3.34 | 0.06 |
| E2 | GPS  | 4A | AX.89522772 | 5.45E+08 | 0.33 | 1.49   | 3.34 | 0.06 |
| E2 | GPS  | 4A | AX.89479914 | 5.95E+08 | 0.42 | 1.35   | 3.08 | 0.04 |
| E2 | GPS  | 4A | AX.89590295 | 5.90E+08 | 0.44 | -1.38  | 3.22 | 0.05 |
| E2 | GY   | 4A | AX.89501499 | 7.26E+08 | 0.15 | -2.82  | 3.38 | 0.04 |
| E2 | GPM2 | 4A | AX.89327806 | 6.04E+08 | 0.34 | 604.67 | 3.95 | 0.08 |
| E2 | TKW  | 4A | AX.89579752 | 7.43E+08 | 0.19 | -1.24  | 3.58 | 0.06 |
| E2 | GY   | 4A | AX.89680789 | 7.25E+08 | 0.18 | -2.54  | 3.12 | 0.04 |
| E2 | GY   | 4A | AX.89680789 | 7.25E+08 | 0.18 | -2.54  | 3.12 | 0.04 |
| E2 | TKW  | 4A | AX.89735480 | 7.40E+08 | 0.36 | -1.05  | 3.76 | 0.06 |
| E2 | GPS  | 4A | AX.89407686 | 5.44E+08 | 0.34 | 1.47   | 3.29 | 0.06 |
| E2 | GPS  | 4A | AX.89494450 | 5.46E+08 | 0.33 | 1.43   | 3.11 | 0.06 |
| E2 | GPS  | 4A | AX.89720099 | 5.95E+08 | 0.42 | 1.35   | 3.08 | 0.04 |
| E2 | TKW  | 4A | AX.89511322 | 3.03E+07 | 0.07 | -1.81  | 3.09 | 0.05 |
| E2 | GPS  | 4A | AX.89653465 | 5.95E+08 | 0.35 | 1.55   | 3.67 | 0.06 |
| E2 | TKW  | 4A | AX.89738968 | 7.34E+08 | 0.18 | -1.15  | 3.02 | 0.05 |
| E2 | GPS  | 4A | AX.89754240 | 5.95E+08 | 0.35 | 1.55   | 3.67 | 0.06 |
| E2 | GPS  | 4A | AX.89407470 | 5.67E+08 | 0.48 | 1.39   | 3.29 | 0.06 |
| E2 | TKW  | 4A | AX.89624256 | 7.44E+08 | 0.20 | -1.23  | 3.60 | 0.06 |
| E2 | GY   | 4A | AX.89668236 | 7.33E+08 | 0.15 | -3.57  | 5.04 | 0.06 |
| E2 | GY   | 4A | AX.89668236 | 7.33E+08 | 0.15 | -3.57  | 5.04 | 0.06 |
| E2 | GY   | 4A | AX.89615361 | 7.24E+08 | 0.06 | -4.62  | 3.75 | 0.05 |
| E2 | GPS  | 4A | AX.89614897 | 5.46E+08 | 0.33 | 1.49   | 3.34 | 0.06 |
| E2 | GPS  | 4A | AX.89468874 | 5.95E+08 | 0.42 | 1.35   | 3.08 | 0.04 |
| E2 | GPS  | 4A | AX.89463488 | 5.45E+08 | 0.33 | 1.49   | 3.34 | 0.06 |
| E2 | GY   | 4A | AX.89377454 | 7.19E+08 | 0.13 | -2.98  | 3.47 | 0.06 |
| E2 | GPS  | 4A | AX.89576809 | 5.45E+08 | 0.33 | 1.43   | 3.11 | 0.06 |
| E2 | TKW  | 4A | AX.89355306 | 7.41E+08 | 0.34 | -1.02  | 3.49 | 0.06 |
| E2 | GPS  | 4A | AX.89429223 | 5.66E+08 | 0.45 | 1.35   | 3.09 | 0.06 |
| E2 | GY   | 4A | AX.89703146 | 7.22E+08 | 0.16 | -2.64  | 3.18 | 0.05 |
| E2 | GPS  | 4A | AX.89560947 | 5.44E+08 | 0.34 | 1.47   | 3.29 | 0.06 |
| E2 | GY   | 4A | AX.89436017 | 7.25E+08 | 0.06 | -4.62  | 3.75 | 0.05 |
| E2 | GY   | 4A | AX.89723261 | 7.33E+08 | 0.17 | -3.21  | 4.57 | 0.06 |
| E2 | GY   | 4A | AX.89704631 | 7.26E+08 | 0.13 | -3.82  | 5.21 | 0.08 |
| E2 | TKW  | 4A | AX.89539186 | 7.43E+08 | 0.19 | -1.34  | 4.02 | 0.07 |
| E2 | GPS  | 4A | AX.89452952 | 5.45E+08 | 0.33 | 1.49   | 3.34 | 0.06 |
| E2 | GY   | 4A | AX.89494292 | 7.21E+08 | 0.17 | -2.61  | 3.23 | 0.05 |

|    |      |    |             |          |      |        |      |      |
|----|------|----|-------------|----------|------|--------|------|------|
| E2 | GPS  | 4A | AX.89658575 | 5.45E+08 | 0.33 | 1.49   | 3.34 | 0.06 |
| E2 | GPS  | 4A | AX.89382686 | 5.45E+08 | 0.32 | 1.51   | 3.39 | 0.06 |
| E2 | GY   | 4A | AX.89615361 | 7.24E+08 | 0.06 | -4.62  | 3.75 | 0.05 |
| E2 | GPS  | 4A | AX.89436427 | 5.95E+08 | 0.35 | 1.55   | 3.67 | 0.06 |
| E2 | GPS  | 4A | AX.89582191 | 5.95E+08 | 0.35 | 1.55   | 3.67 | 0.06 |
| E2 | TKW  | 4A | AX.89446643 | 7.40E+08 | 0.36 | -1.05  | 3.76 | 0.06 |
| E2 | GPS  | 4A | AX.89663898 | 5.65E+08 | 0.32 | 1.43   | 3.06 | 0.05 |
| E2 | GY   | 4A | AX.89686634 | 7.12E+07 | 0.11 | -3.11  | 3.15 | 0.04 |
| E2 | GPS  | 4A | AX.89312729 | 5.46E+08 | 0.33 | 1.49   | 3.34 | 0.06 |
| E2 | GPM2 | 4A | AX.89333422 | 6.04E+08 | 0.34 | 604.67 | 3.95 | 0.08 |
| E2 | GPS  | 4A | AX.89499788 | 5.44E+08 | 0.34 | 1.47   | 3.29 | 0.06 |
| E2 | GPS  | 4A | AX.89430644 | 5.63E+08 | 0.44 | 1.40   | 3.29 | 0.06 |
| E2 | GPS  | 4A | AX.89620966 | 5.66E+08 | 0.45 | 1.35   | 3.09 | 0.06 |
| E2 | GY   | 4A | AX.89546685 | 7.39E+08 | 0.18 | -3.18  | 4.76 | 0.06 |
| E2 | GY   | 4A | AX.89546685 | 7.39E+08 | 0.18 | -3.18  | 4.76 | 0.06 |
| E2 | GPS  | 4A | AX.89538080 | 5.45E+08 | 0.33 | 1.49   | 3.34 | 0.06 |
| E2 | TKW  | 4A | AX.89599133 | 7.40E+08 | 0.34 | -1.08  | 3.87 | 0.07 |
| E2 | TKW  | 4A | AX.89363602 | 6.04E+08 | 0.44 | -0.94  | 3.28 | 0.06 |
| E2 | TKW  | 4A | AX.89747478 | 7.41E+08 | 0.36 | -1.05  | 3.76 | 0.06 |
| E2 | GPS  | 4A | AX.89574815 | 5.44E+08 | 0.34 | 1.47   | 3.29 | 0.06 |
| E2 | GPS  | 4A | AX.89603692 | 5.95E+08 | 0.42 | 1.35   | 3.08 | 0.04 |
| E2 | GPS  | 4A | AX.89624314 | 5.38E+08 | 0.31 | 1.52   | 3.38 | 0.06 |
| E2 | TKW  | 4A | AX.89324248 | 7.43E+08 | 0.15 | -1.26  | 3.12 | 0.05 |
| E2 | GPS  | 4A | AX.89484427 | 5.45E+08 | 0.34 | 1.47   | 3.29 | 0.06 |
| E2 | GPS  | 4A | AX.89516218 | 5.95E+08 | 0.36 | 1.49   | 3.47 | 0.06 |
| E2 | GPS  | 4A | AX.89772491 | 5.95E+08 | 0.35 | 1.55   | 3.67 | 0.06 |
| E2 | TKW  | 4A | AX.89586557 | 7.43E+08 | 0.20 | -1.19  | 3.45 | 0.06 |
| E2 | TKW  | 4A | AX.89431866 | 7.34E+08 | 0.22 | -1.09  | 3.05 | 0.05 |
| E2 | TKW  | 4A | AX.89726273 | 7.40E+08 | 0.35 | -0.99  | 3.40 | 0.06 |
| E2 | GY   | 4A | AX.89759750 | 7.22E+08 | 0.16 | -3.03  | 4.11 | 0.07 |
| E2 | GPS  | 4A | AX.89760301 | 6.07E+08 | 0.40 | -1.37  | 3.12 | 0.05 |
| E2 | GPS  | 4A | AX.89723951 | 5.67E+08 | 0.45 | 1.35   | 3.09 | 0.06 |
| E2 | GPS  | 4A | AX.89777494 | 6.10E+08 | 0.31 | 1.46   | 3.15 | 0.06 |
| E2 | GY   | 4A | AX.89373580 | 2.24E+08 | 0.11 | -3.00  | 3.05 | 0.04 |
| E2 | GPS  | 4A | AX.89550641 | 5.45E+08 | 0.33 | 1.49   | 3.34 | 0.06 |
| E2 | GPS  | 4A | AX.89637984 | 5.46E+08 | 0.33 | 1.49   | 3.34 | 0.06 |
| E2 | GPS  | 4A | AX.89457395 | 5.45E+08 | 0.33 | 1.49   | 3.34 | 0.06 |
| E2 | GPS  | 4A | AX.89768942 | 5.45E+08 | 0.33 | 1.49   | 3.34 | 0.06 |
| E2 | TKW  | 4A | AX.89639898 | 7.44E+08 | 0.21 | -1.27  | 3.89 | 0.07 |
| E2 | GPS  | 4A | AX.89429683 | 5.44E+08 | 0.34 | 1.47   | 3.29 | 0.06 |
| E2 | TKW  | 4A | AX.89349918 | 7.40E+08 | 0.17 | -1.22  | 3.23 | 0.05 |
| E2 | TKW  | 4A | AX.89423722 | 6.04E+08 | 0.38 | -0.95  | 3.23 | 0.06 |
| E2 | GPS  | 4A | AX.89749915 | 5.70E+08 | 0.35 | 1.53   | 3.57 | 0.07 |
| E2 | GPS  | 4A | AX.89539135 | 5.66E+08 | 0.45 | 1.35   | 3.09 | 0.06 |
| E2 | GPS  | 4A | AX.89641774 | 5.66E+08 | 0.45 | 1.35   | 3.09 | 0.06 |
| E2 | GPS  | 4A | AX.89711000 | 5.46E+08 | 0.33 | 1.66   | 4.02 | 0.07 |
| E2 | GPS  | 4A | AX.89491834 | 6.12E+08 | 0.47 | 1.35   | 3.14 | 0.05 |
| E2 | GY   | 4A | AX.89723261 | 7.33E+08 | 0.17 | -3.21  | 4.57 | 0.06 |
| E2 | GY   | 4A | AX.89665964 | 7.41E+08 | 0.23 | -2.79  | 4.41 | 0.05 |
| E2 | TKW  | 4A | AX.89372934 | 7.17E+08 | 0.20 | -1.12  | 3.11 | 0.05 |

|    |      |    |               |          |      |          |      |      |
|----|------|----|---------------|----------|------|----------|------|------|
| E2 | TKW  | 4A | AX.89642948   | 7.41E+08 | 0.35 | -1.03    | 3.60 | 0.06 |
| E2 | GY   | 4A | AX.89494292   | 7.21E+08 | 0.17 | -2.61    | 3.23 | 0.05 |
| E2 | GPS  | 4A | AX.89415141   | 5.45E+08 | 0.33 | 1.49     | 3.34 | 0.06 |
| E2 | TKW  | 4A | AX.89338248   | 7.40E+08 | 0.31 | -0.99    | 3.17 | 0.05 |
| E2 | GPS  | 4A | AX.89695940   | 5.45E+08 | 0.33 | 1.49     | 3.34 | 0.06 |
| E2 | GPS  | 4A | AX.89529538   | 6.04E+08 | 0.34 | 1.47     | 3.31 | 0.05 |
| E2 | TKW  | 4A | AX.89621604   | 7.31E+08 | 0.26 | -1.08    | 3.42 | 0.06 |
| E2 | GPS  | 4A | AX.89463074   | 5.45E+08 | 0.33 | 1.49     | 3.34 | 0.06 |
| E2 | GPS  | 4A | AX.89317294   | 5.52E+08 | 0.33 | 1.59     | 3.73 | 0.07 |
| E2 | GPS  | 4A | AX.89489375   | 1.68E+07 | 0.43 | 1.33     | 3.03 | 0.06 |
| E2 | GY   | 4A | AX.89686634   | 7.12E+07 | 0.11 | -3.11    | 3.15 | 0.04 |
| E2 | GPS  | 4A | AX.89606650   | 5.44E+08 | 0.33 | 1.41     | 3.06 | 0.06 |
| E2 | TKW  | 4A | AX.89415948   | 7.27E+08 | 0.25 | -1.05    | 3.21 | 0.05 |
| E2 | GPS  | 4A | AX.89617217   | 5.65E+08 | 0.44 | 1.40     | 3.29 | 0.06 |
| E2 | GPS  | 4A | AX.89320878   | 5.66E+08 | 0.45 | 1.35     | 3.09 | 0.06 |
| E2 | GPS  | 4A | AX.89686935   | 5.67E+08 | 0.45 | 1.35     | 3.09 | 0.06 |
| E2 | GPS  | 4A | AX.89654837   | 5.46E+08 | 0.33 | 1.49     | 3.34 | 0.06 |
| E2 | TKW  | 4A | AX.89465835   | 7.41E+08 | 0.35 | -1.01    | 3.52 | 0.06 |
| E2 | GPS  | 4A | AX.89566991   | 5.49E+08 | 0.30 | 1.47     | 3.10 | 0.06 |
| E2 | GPS  | 4A | AX.89342508   | 5.67E+08 | 0.45 | 1.35     | 3.09 | 0.06 |
| E2 | TKW  | 4A | AX.89684381   | 7.40E+08 | 0.36 | -1.05    | 3.76 | 0.06 |
| E2 | GPS  | 4A | AX.89597478   | 5.45E+08 | 0.33 | 1.49     | 3.34 | 0.06 |
| E2 | TKW  | 4A | AX.89387177   | 7.33E+08 | 0.20 | -1.11    | 3.06 | 0.05 |
| E2 | GPS  | 4A | AX.89485438   | 5.45E+08 | 0.33 | 1.49     | 3.34 | 0.06 |
| E2 | GPS  | 4A | AX.89703903   | 5.45E+08 | 0.33 | 1.49     | 3.34 | 0.06 |
| E2 | TKW  | 4A | AX.89706134   | 7.42E+08 | 0.36 | -1.05    | 3.76 | 0.06 |
| E2 | GPS  | 4A | AX.89557552   | 6.04E+08 | 0.36 | -1.57    | 3.78 | 0.06 |
| E2 | GPS  | 4A | AX.89694514   | 5.45E+08 | 0.33 | 1.49     | 3.34 | 0.06 |
| E2 | GPS  | 4A | AX.89614652   | 5.95E+08 | 0.35 | 1.55     | 3.67 | 0.06 |
| E2 | GPS  | 4A | AX.89380992   | 6.12E+08 | 0.24 | -1.67    | 3.43 | 0.06 |
| E2 | GPS  | 4A | AX.89540224   | 5.95E+08 | 0.36 | 1.49     | 3.47 | 0.06 |
| E2 | TKW  | 4A | AX.89486501   | 7.41E+08 | 0.35 | -0.99    | 3.40 | 0.06 |
| E2 | TKW  | 4A | AX.89310426   | 7.41E+08 | 0.35 | -1.04    | 3.68 | 0.06 |
| E2 | GPS  | 4A | AX.89547782   | 5.46E+08 | 0.33 | 1.66     | 4.02 | 0.07 |
| E2 | GPS  | 4A | AX.89333422   | 6.04E+08 | 0.34 | 1.47     | 3.31 | 0.05 |
| E2 | TKW  | 4A | AX.89373507   | 7.41E+08 | 0.30 | -1.00    | 3.21 | 0.05 |
| E2 | GY   | 4A | AX.89759750   | 7.22E+08 | 0.16 | -3.03    | 4.11 | 0.07 |
| E2 | GPS  | 4A | AX.89733116   | 5.45E+08 | 0.33 | 1.49     | 3.34 | 0.06 |
| E2 | GPS  | 4A | AX.89541821   | 5.45E+08 | 0.33 | 1.49     | 3.34 | 0.06 |
| E2 | GY   | 4A | AX.89665964   | 7.41E+08 | 0.23 | -2.79    | 4.41 | 0.05 |
| E2 | GPS  | 4A | AX.89511520   | 5.71E+08 | 0.31 | 1.45     | 3.12 | 0.06 |
| E2 | GPS  | 4A | AX.89746916   | 5.66E+08 | 0.45 | 1.35     | 3.09 | 0.06 |
| E2 | GPS  | 4A | AX.89499197   | 5.46E+08 | 0.33 | 1.43     | 3.11 | 0.06 |
| E2 | GPS  | 4A | AX.89734417   | 5.45E+08 | 0.33 | 1.49     | 3.34 | 0.06 |
| E3 | GPM2 | 4A | X.89325402_OT | 6.69E+08 | 0.44 | -913.03  | 3.43 | 0.07 |
| E3 | GPM2 | 4A | X.89674491_OT | 6.69E+08 | 0.46 | -958.08  | 3.72 | 0.07 |
| E3 | GPM2 | 4A | AX.89459824   | 6.69E+08 | 0.47 | -1097.28 | 4.70 | 0.09 |
| E3 | GPM2 | 4A | X.89704963_OT | 6.69E+08 | 0.46 | -933.00  | 3.57 | 0.08 |
| E3 | GPM2 | 4A | AX.89473133   | 7.01E+08 | 0.33 | -1120.06 | 4.14 | 0.04 |
| E3 | GPM2 | 4A | AX.89345173   | 7.02E+08 | 0.28 | -1003.86 | 3.08 | 0.07 |

|    |      |    |               |          |      |          |      |      |
|----|------|----|---------------|----------|------|----------|------|------|
| E3 | GPM2 | 4A | AX.89575491   | 7.05E+08 | 0.42 | -973.04  | 3.67 | 0.08 |
| E3 | GPM2 | 4A | AX.89509899   | 7.05E+08 | 0.42 | -973.04  | 3.67 | 0.08 |
| E3 | GPM2 | 4A | AX.89629538   | 7.05E+08 | 0.40 | -898.86  | 3.17 | 0.07 |
| E3 | GPM2 | 4A | X.89471294_OT | 7.09E+08 | 0.37 | -890.86  | 3.22 | 0.07 |
| E3 | GPM2 | 4A | X.89420240_OT | 7.09E+08 | 0.38 | -973.18  | 3.73 | 0.08 |
| E3 | GPM2 | 4A | X.89364662_OT | 7.09E+08 | 0.38 | -899.63  | 3.21 | 0.08 |
| E3 | GPM2 | 4A | X.89751487_OT | 7.12E+08 | 0.17 | -1103.89 | 3.11 | 0.03 |
| E3 | GPM2 | 4A | AX.89699790   | 7.13E+08 | 0.47 | -1106.26 | 4.63 | 0.10 |
| E3 | GPM2 | 4A | X.89703546_OT | 7.14E+08 | 0.33 | -926.03  | 3.00 | 0.08 |
| E3 | GPM2 | 4A | AX.89576549   | 7.34E+08 | 0.35 | -1082.11 | 3.71 | 0.11 |
| E3 | GPS  | 4A | AX.89417750   | 5.98E+08 | 0.08 | 3.99     | 3.75 | 0.10 |
| E3 | GPS  | 4A | AX.89669181   | 7.13E+08 | 0.41 | 2.50     | 3.79 | 0.11 |
| E3 | GPS  | 4A | AX.89423003   | 7.13E+08 | 0.42 | 2.41     | 3.56 | 0.10 |
| E3 | GPS  | 4A | AX.89582784   | 7.13E+08 | 0.42 | 2.38     | 3.51 | 0.10 |
| E3 | GPS  | 4A | AX.89639950   | 7.13E+08 | 0.41 | 2.50     | 3.79 | 0.11 |
| E3 | GPS  | 4A | AX.89699790   | 7.13E+08 | 0.48 | -2.11    | 3.17 | 0.07 |
| E3 | GPS  | 4A | AX.89678654   | 7.33E+08 | 0.39 | -2.19    | 3.05 | 0.09 |
| E3 | GPS  | 4A | AX.89576549   | 7.34E+08 | 0.36 | -2.23    | 3.09 | 0.09 |
| E3 | GPS  | 4A | AX.89449191   | 7.34E+08 | 0.34 | -2.30    | 3.04 | 0.09 |
| E3 | GPS  | 4A | X.89368493_OT | 7.39E+08 | 0.33 | -2.47    | 3.30 | 0.08 |
| E3 | GPS  | 4A | AX.89423354   | 7.39E+08 | 0.33 | -2.47    | 3.30 | 0.08 |
| E3 | GPS  | 4A | X.89443062_OT | 7.39E+08 | 0.31 | -2.70    | 3.94 | 0.09 |
| E3 | GPS  | 4A | X.89691446_OT | 7.39E+08 | 0.32 | -2.58    | 3.47 | 0.08 |
| E3 | GY   | 4A | AX.89482533   | 3.87E+07 | 0.26 | -3.51    | 3.52 | 0.05 |
| E3 | GY   | 4A | AX.89649145   | 5.97E+08 | 0.09 | 5.42     | 3.56 | 0.03 |
| E3 | GY   | 4A | AX.89619129   | 6.15E+08 | 0.22 | -3.77    | 3.16 | 0.03 |
| E3 | GY   | 4A | AX.89724746   | 6.41E+08 | 0.30 | -3.19    | 3.14 | 0.12 |
| E3 | GY   | 4A | AX.89340378   | 6.41E+08 | 0.30 | -3.19    | 3.14 | 0.12 |
| E3 | GY   | 4A | AX.89528746   | 6.41E+08 | 0.30 | -3.19    | 3.14 | 0.12 |
| E3 | GY   | 4A | AX.89433709   | 6.41E+08 | 0.29 | -3.41    | 3.45 | 0.12 |
| E3 | GY   | 4A | AX.89459824   | 6.69E+08 | 0.47 | -2.92    | 3.18 | 0.04 |
| E3 | GY   | 4A | AX.89608694   | 7.12E+08 | 0.31 | 3.51     | 3.02 | 0.09 |
| E3 | GY   | 4A | X.89741178_OT | 7.12E+08 | 0.16 | -3.98    | 3.26 | 0.04 |
| E3 | GY   | 4A | AX.89428823   | 7.12E+08 | 0.32 | 3.46     | 3.04 | 0.09 |
| E3 | GY   | 4A | X.89751487_OT | 7.12E+08 | 0.17 | -3.73    | 3.18 | 0.05 |
| E3 | GY   | 4A | AX.89658868   | 7.25E+08 | 0.36 | 3.42     | 3.04 | 0.08 |
| E3 | SPM2 | 4A | AX.89514281   | 5.71E+08 | 0.10 | -32.27   | 3.22 | 0.05 |
| E3 | TKW  | 4A | AX.89743733   | 2.98E+06 | 0.43 | 0.85     | 3.05 | 0.10 |
| E3 | TKW  | 4A | AX.89558480   | 1.22E+07 | 0.35 | 0.92     | 3.38 | 0.01 |
| E3 | TKW  | 4A | AX.89541289   | 1.22E+07 | 0.35 | 0.88     | 3.10 | 0.01 |
| E3 | TKW  | 4A | AX.89489876   | 1.22E+07 | 0.35 | 0.92     | 3.38 | 0.01 |
| E3 | TKW  | 4A | AX.89682277   | 1.22E+07 | 0.35 | 0.92     | 3.38 | 0.01 |
| E3 | TKW  | 4A | AX.89395097   | 1.22E+07 | 0.35 | 0.88     | 3.10 | 0.01 |
| E3 | TKW  | 4A | AX.89384438   | 1.22E+07 | 0.48 | -0.86    | 3.35 | 0.00 |
| E3 | TKW  | 4A | AX.89772643   | 1.24E+07 | 0.48 | -0.85    | 3.27 | 0.00 |
| E3 | TKW  | 4A | AX.89485967   | 2.36E+08 | 0.33 | 1.04     | 3.10 | 0.11 |
| E3 | TKW  | 4A | AX.89600822   | 3.51E+08 | 0.33 | 1.04     | 3.10 | 0.11 |
| E3 | TKW  | 4A | AX.89516967   | 3.79E+08 | 0.34 | 1.06     | 3.24 | 0.11 |
| E3 | TKW  | 4A | AX.89463640   | 4.08E+08 | 0.34 | 1.06     | 3.24 | 0.11 |
| E3 | TKW  | 4A | X.89383862_OT | 7.22E+08 | 0.25 | 1.09     | 3.07 | 0.16 |



|    |      |    |               |          |      |          |      |      |
|----|------|----|---------------|----------|------|----------|------|------|
| E4 | GPS  | 4A | AX.89493898   | 1.14E+07 | 0.24 | 1.91     | 3.22 | 0.09 |
| E4 | GPS  | 4A | AX.89678741   | 5.94E+08 | 0.24 | 1.76     | 3.03 | 0.06 |
| E4 | GPS  | 4A | AX.89366134   | 5.94E+08 | 0.24 | 1.78     | 3.10 | 0.06 |
| E4 | GPS  | 4A | AX.89465023   | 6.62E+08 | 0.36 | 1.70     | 3.35 | 0.08 |
| E4 | GPS  | 4A | AX.89426251   | 6.63E+08 | 0.36 | 1.70     | 3.35 | 0.08 |
| E4 | GPS  | 4A | AX.89586524   | 6.63E+08 | 0.39 | 1.89     | 4.13 | 0.09 |
| E4 | GPM2 | 4A | AX.89720401   | 6.41E+08 | 0.25 | -500.04  | 3.03 | 0.06 |
| E4 | GPM2 | 4A | AX.89356961   | 6.41E+08 | 0.25 | -522.41  | 3.39 | 0.07 |
| E4 | GPM2 | 4A | AX.89376969   | 6.41E+08 | 0.25 | -522.41  | 3.39 | 0.07 |
| E4 | GPM2 | 4A | AX.89543865   | 6.41E+08 | 0.26 | -521.89  | 3.41 | 0.07 |
| E4 | GPM2 | 4A | AX.89398574   | 6.41E+08 | 0.30 | -493.02  | 3.19 | 0.09 |
| E4 | GPM2 | 4A | AX.89330535   | 6.68E+08 | 0.24 | -523.60  | 3.23 | 0.06 |
| E4 | GPM2 | 4A | AX.89459824   | 6.69E+08 | 0.47 | -531.19  | 4.22 | 0.08 |
| E4 | GPM2 | 4A | AX.89749515   | 6.81E+08 | 0.05 | -1077.23 | 3.73 | 0.06 |
| E4 | GPM2 | 4A | AX.89531132   | 6.85E+08 | 0.28 | -542.91  | 3.20 | 0.07 |
| E4 | GPM2 | 4A | AX.89699790   | 7.13E+08 | 0.47 | -524.02  | 4.03 | 0.08 |
| E4 | GPS  | 4A | AX.89443183   | 6.68E+08 | 0.25 | -1.78    | 3.33 | 0.08 |
| E4 | GPS  | 4A | AX.89330535   | 6.68E+08 | 0.24 | -1.87    | 3.57 | 0.08 |
| E4 | GPS  | 4A | X.89674491_OT | 6.69E+08 | 0.46 | -1.49    | 3.09 | 0.03 |
| E4 | GPS  | 4A | AX.89531132   | 6.85E+08 | 0.28 | -2.02    | 3.85 | 0.11 |
| E4 | GPS  | 4A | AX.89733479   | 6.86E+08 | 0.28 | -1.86    | 3.33 | 0.10 |
| E4 | GY   | 4A | AX.89651410   | 6.33E+08 | 0.28 | -1.65    | 3.20 | 0.03 |
| E4 | GY   | 4A | AX.89436511   | 6.33E+08 | 0.27 | -1.77    | 3.60 | 0.04 |
| E4 | GY   | 4A | AX.89693822   | 6.33E+08 | 0.28 | -1.80    | 3.71 | 0.04 |
| E4 | GY   | 4A | AX.89493396   | 6.33E+08 | 0.28 | -1.67    | 3.29 | 0.04 |
| E4 | GY   | 4A | AX.89562504   | 6.33E+08 | 0.28 | -1.80    | 3.71 | 0.04 |
| E4 | GY   | 4A | AX.89481375   | 6.33E+08 | 0.28 | -1.66    | 3.23 | 0.04 |
| E4 | GY   | 4A | AX.89495210   | 6.33E+08 | 0.29 | -1.63    | 3.14 | 0.04 |
| E4 | GY   | 4A | AX.89689438   | 6.33E+08 | 0.27 | -1.79    | 3.65 | 0.04 |
| E4 | GY   | 4A | AX.89730528   | 6.33E+08 | 0.27 | -1.78    | 3.65 | 0.04 |
| E4 | GY   | 4A | AX.89428257   | 6.35E+08 | 0.27 | -1.70    | 3.31 | 0.04 |
| E4 | GY   | 4A | AX.89330535   | 6.68E+08 | 0.25 | -1.80    | 3.35 | 0.07 |
| E4 | GY   | 4A | AX.89531132   | 6.85E+08 | 0.29 | -1.88    | 3.43 | 0.08 |
| E4 | GY   | 4A | AX.89733479   | 6.86E+08 | 0.28 | -1.77    | 3.06 | 0.08 |
| E4 | GY   | 4A | X.89751487_OT | 7.12E+08 | 0.17 | -2.04    | 3.40 | 0.05 |
| E4 | SPM2 | 4A | AX.89347196   | 5.93E+07 | 0.22 | 21.60    | 3.47 | 0.09 |
| E4 | SPM2 | 4A | AX.89593037   | 5.93E+07 | 0.22 | 21.26    | 3.40 | 0.09 |
| E4 | SPM2 | 4A | AX.89377280   | 5.93E+07 | 0.21 | 23.47    | 3.95 | 0.09 |
| E4 | SPM2 | 4A | AX.89641336   | 5.93E+07 | 0.22 | 21.60    | 3.47 | 0.09 |
| E4 | SPM2 | 4A | AX.89340695   | 5.93E+07 | 0.21 | 22.97    | 3.83 | 0.09 |
| E4 | SPM2 | 4A | AX.89499680   | 5.93E+07 | 0.22 | 21.26    | 3.40 | 0.09 |
| E4 | SPM2 | 4A | AX.89622341   | 5.93E+07 | 0.21 | 22.97    | 3.83 | 0.09 |
| E4 | SPM2 | 4A | AX.89679002   | 5.93E+07 | 0.21 | 22.97    | 3.83 | 0.09 |
| E4 | SPM2 | 4A | AX.89702938   | 5.93E+07 | 0.21 | 22.97    | 3.83 | 0.09 |
| E4 | SPM2 | 4A | AX.89767322   | 5.93E+07 | 0.22 | 21.26    | 3.40 | 0.09 |
| E4 | SPM2 | 4A | AX.89350995   | 5.93E+07 | 0.21 | 23.58    | 3.95 | 0.09 |
| E4 | SPM2 | 4A | AX.89428279   | 5.93E+07 | 0.21 | 22.97    | 3.83 | 0.09 |
| E4 | SPM2 | 4A | AX.89409621   | 5.93E+07 | 0.21 | 22.97    | 3.83 | 0.09 |
| E4 | SPM2 | 4A | AX.89550625   | 5.93E+07 | 0.22 | 21.26    | 3.40 | 0.09 |
| E4 | SPM2 | 4A | AX.89497321   | 5.93E+07 | 0.22 | 21.26    | 3.40 | 0.09 |

|    |      |    |             |          |      |       |      |      |
|----|------|----|-------------|----------|------|-------|------|------|
| E4 | SPM2 | 4A | AX.89610582 | 5.94E+07 | 0.16 | 29.17 | 4.85 | 0.11 |
| E4 | SPM2 | 4A | AX.89675862 | 5.95E+07 | 0.16 | 29.17 | 4.85 | 0.11 |
| E4 | SPM2 | 4A | AX.89374032 | 5.97E+07 | 0.17 | 27.70 | 4.50 | 0.11 |
| E4 | SPM2 | 4A | AX.89423661 | 5.97E+07 | 0.17 | 27.70 | 4.50 | 0.11 |
| E4 | SPM2 | 4A | AX.89529011 | 6.00E+07 | 0.17 | 27.70 | 4.50 | 0.11 |
| E4 | SPM2 | 4A | AX.89661494 | 6.00E+07 | 0.17 | 27.70 | 4.50 | 0.11 |
| E4 | SPM2 | 4A | AX.89346727 | 6.00E+07 | 0.17 | 27.70 | 4.50 | 0.11 |
| E4 | SPM2 | 4A | AX.89734528 | 6.00E+07 | 0.17 | 27.70 | 4.50 | 0.11 |
| E4 | SPM2 | 4A | AX.89634693 | 6.00E+07 | 0.17 | 27.70 | 4.50 | 0.11 |
| E4 | SPM2 | 4A | AX.89726762 | 6.00E+07 | 0.17 | 27.70 | 4.50 | 0.11 |
| E4 | GY   | 4A | AX.89737326 | 6.32E+08 | 0.23 | -1.74 | 3.25 | 0.04 |
| E4 | GY   | 4A | AX.89658540 | 6.32E+08 | 0.19 | -1.82 | 3.11 | 0.03 |
| E4 | GY   | 4A | AX.89377442 | 6.32E+08 | 0.19 | -1.88 | 3.29 | 0.03 |
| E4 | GY   | 4A | AX.89538574 | 6.33E+08 | 0.27 | -1.77 | 3.60 | 0.04 |
| E4 | SPM2 | 4A | AX.89728973 | 6.00E+07 | 0.17 | 26.08 | 4.08 | 0.11 |
| E4 | SPM2 | 4A | AX.89477053 | 6.00E+07 | 0.17 | 27.70 | 4.50 | 0.11 |
| E4 | SPM2 | 4A | AX.89380263 | 6.00E+07 | 0.17 | 27.70 | 4.50 | 0.11 |
| E4 | SPM2 | 4A | AX.89549134 | 6.01E+07 | 0.17 | 27.70 | 4.50 | 0.11 |
| E4 | SPM2 | 4A | AX.89587224 | 6.01E+07 | 0.17 | 27.70 | 4.50 | 0.11 |
| E4 | SPM2 | 4A | AX.89389399 | 6.01E+07 | 0.16 | 29.42 | 4.76 | 0.11 |
| E4 | SPM2 | 4A | AX.89410827 | 6.01E+07 | 0.17 | 27.70 | 4.50 | 0.11 |
| E4 | SPM2 | 4A | AX.89428290 | 6.01E+07 | 0.17 | 27.70 | 4.50 | 0.11 |
| E4 | SPM2 | 4A | AX.89666804 | 6.03E+07 | 0.17 | 28.30 | 4.64 | 0.12 |
| E4 | SPM2 | 4A | AX.89403111 | 6.04E+07 | 0.16 | 27.52 | 4.38 | 0.10 |
| E4 | SPM2 | 4A | AX.89711066 | 6.06E+07 | 0.16 | 29.34 | 4.92 | 0.11 |
| E4 | SPM2 | 4A | AX.89640473 | 6.07E+07 | 0.16 | 26.22 | 4.01 | 0.10 |
| E4 | SPM2 | 4A | AX.89702651 | 6.07E+07 | 0.16 | 26.22 | 4.01 | 0.10 |
| E4 | SPM2 | 4A | AX.89338941 | 6.07E+07 | 0.16 | 26.22 | 4.01 | 0.10 |
| E4 | SPM2 | 4A | AX.89629648 | 6.07E+07 | 0.17 | 24.59 | 3.62 | 0.10 |
| E4 | SPM2 | 4A | AX.89665341 | 6.07E+07 | 0.16 | 26.22 | 4.01 | 0.10 |
| E4 | SPM2 | 4A | AX.89594759 | 6.07E+07 | 0.16 | 26.22 | 4.01 | 0.10 |
| E4 | SPM2 | 4A | AX.89502015 | 6.07E+07 | 0.17 | 24.59 | 3.62 | 0.10 |
| E4 | SPM2 | 4A | AX.89541830 | 6.07E+07 | 0.16 | 26.22 | 4.01 | 0.10 |
| E4 | SPM2 | 4A | AX.89369254 | 6.07E+07 | 0.16 | 26.22 | 4.01 | 0.10 |
| E4 | SPM2 | 4A | AX.89738592 | 6.07E+07 | 0.16 | 26.22 | 4.01 | 0.10 |
| E4 | SPM2 | 4A | AX.89390212 | 6.07E+07 | 0.16 | 26.22 | 4.01 | 0.10 |
| E4 | SPM2 | 4A | AX.89380201 | 6.07E+07 | 0.16 | 27.73 | 4.34 | 0.10 |
| E4 | SPM2 | 4A | AX.89671748 | 6.07E+07 | 0.16 | 25.23 | 3.69 | 0.10 |
| E4 | SPM2 | 4A | AX.89470893 | 6.07E+07 | 0.17 | 24.59 | 3.62 | 0.10 |
| E4 | SPM2 | 4A | AX.89656158 | 6.07E+07 | 0.17 | 24.59 | 3.62 | 0.10 |
| E4 | SPM2 | 4A | AX.89347048 | 6.07E+07 | 0.17 | 24.59 | 3.62 | 0.10 |
| E4 | SPM2 | 4A | AX.89533264 | 6.07E+07 | 0.16 | 25.30 | 3.74 | 0.10 |
| E4 | SPM2 | 4A | AX.89323460 | 6.07E+07 | 0.16 | 26.07 | 3.93 | 0.10 |
| E4 | SPM2 | 4A | AX.89729754 | 6.07E+07 | 0.17 | 24.59 | 3.62 | 0.10 |
| E4 | SPM2 | 4A | AX.89525947 | 6.07E+07 | 0.19 | 22.39 | 3.36 | 0.09 |
| E4 | SPM2 | 4A | AX.89642875 | 6.09E+07 | 0.19 | 22.39 | 3.36 | 0.09 |
| E4 | SPM2 | 4A | AX.89336846 | 6.09E+07 | 0.18 | 22.45 | 3.34 | 0.09 |
| E4 | SPM2 | 4A | AX.89617643 | 6.09E+07 | 0.19 | 22.39 | 3.36 | 0.09 |
| E4 | SPM2 | 4A | AX.89632908 | 6.09E+07 | 0.19 | 22.39 | 3.36 | 0.09 |
| E4 | SPM2 | 4A | AX.89725238 | 6.09E+07 | 0.19 | 22.39 | 3.36 | 0.09 |

|    |      |    |             |          |      |       |      |      |
|----|------|----|-------------|----------|------|-------|------|------|
| E4 | SPM2 | 4A | AX.89535950 | 6.09E+07 | 0.19 | 22.39 | 3.36 | 0.09 |
| E4 | SPM2 | 4A | AX.89638765 | 1.53E+08 | 0.06 | 32.88 | 3.14 | 0.05 |
| E4 | SPM2 | 4A | AX.89669974 | 5.70E+08 | 0.43 | 19.53 | 3.94 | 0.09 |
| E4 | SPM2 | 4A | AX.89328975 | 5.96E+08 | 0.06 | 33.02 | 3.44 | 0.06 |
| E4 | TKW  | 4A | AX.89629988 | 7.01E+08 | 0.17 | 1.17  | 3.37 | 0.06 |
| E4 | TKW  | 4A | AX.89473133 | 7.01E+08 | 0.33 | 0.90  | 3.00 | 0.03 |
| E1 | GY   | 4B | AX.89426986 | 6.58E+08 | 0.09 | -4.07 | 3.15 | 0.05 |
| E1 | GY   | 4B | AX.89378611 | 1.60E+08 | 0.39 | -2.38 | 3.17 | 0.04 |
| E1 | GY   | 4B | AX.86162512 | 5.32E+08 | 0.32 | 2.53  | 3.26 | 0.06 |
| E1 | GY   | 4B | AX.89380326 | 5.62E+08 | 0.25 | 2.71  | 3.24 | 0.06 |
| E1 | GY   | 4B | AX.89606985 | 5.25E+08 | 0.16 | -3.11 | 3.12 | 0.07 |
| E1 | GY   | 4B | AX.89449444 | 5.62E+08 | 0.27 | 2.82  | 3.61 | 0.06 |
| E1 | GY   | 4B | AX.89336970 | 5.32E+08 | 0.32 | 2.53  | 3.26 | 0.06 |
| E1 | GY   | 4B | AX.89586334 | 6.58E+08 | 0.08 | -4.21 | 3.19 | 0.05 |
| E1 | SPM2 | 4B | AX.89582795 | 6.43E+08 | 0.32 | 18.63 | 3.39 | 0.05 |
| E1 | GY   | 4B | AX.89599985 | 5.62E+08 | 0.28 | 2.57  | 3.15 | 0.06 |
| E1 | SPM2 | 4B | AX.89378745 | 6.43E+08 | 0.33 | 17.15 | 3.02 | 0.04 |
| E1 | GY   | 4B | AX.89407311 | 5.62E+08 | 0.27 | 2.94  | 3.87 | 0.07 |
| E1 | GY   | 4B | AX.89433824 | 6.58E+08 | 0.08 | -5.05 | 4.38 | 0.07 |
| E1 | GY   | 4B | AX.89426986 | 6.58E+08 | 0.09 | -4.07 | 3.15 | 0.05 |
| E1 | GY   | 4B | AX.89705801 | 6.58E+08 | 0.09 | -4.37 | 3.56 | 0.06 |
| E1 | GY   | 4B | AX.89449444 | 5.62E+08 | 0.27 | 2.82  | 3.61 | 0.06 |
| E1 | GY   | 4B | AX.89606985 | 5.25E+08 | 0.16 | -3.11 | 3.12 | 0.07 |
| E1 | GY   | 4B | AX.89599985 | 5.62E+08 | 0.28 | 2.57  | 3.15 | 0.06 |
| E1 | GY   | 4B | AX.89376848 | 2.15E+08 | 0.28 | 2.73  | 3.52 | 0.06 |
| E1 | GY   | 4B | AX.89743825 | 5.32E+08 | 0.32 | 2.53  | 3.26 | 0.06 |
| E1 | SPM2 | 4B | AX.89753580 | 6.43E+08 | 0.33 | 17.15 | 3.02 | 0.04 |
| E1 | GY   | 4B | AX.89344896 | 1.62E+08 | 0.38 | -2.50 | 3.42 | 0.05 |
| E1 | GY   | 4B | AX.89643271 | 5.33E+08 | 0.32 | 2.53  | 3.26 | 0.06 |
| E1 | GY   | 4B | AX.89588328 | 5.62E+08 | 0.28 | 2.57  | 3.15 | 0.06 |
| E1 | SPM2 | 4B | AX.89689341 | 6.43E+08 | 0.32 | 18.63 | 3.39 | 0.05 |
| E1 | GY   | 4B | AX.89349390 | 5.88E+08 | 0.25 | 2.92  | 3.69 | 0.07 |
| E1 | GY   | 4B | AX.89476043 | 6.58E+08 | 0.09 | -4.86 | 4.45 | 0.07 |
| E1 | GY   | 4B | AX.89388981 | 1.69E+08 | 0.39 | -2.31 | 3.02 | 0.04 |
| E1 | GY   | 4B | AX.89377927 | 5.32E+08 | 0.32 | 2.53  | 3.26 | 0.06 |
| E1 | GY   | 4B | AX.89389357 | 6.58E+08 | 0.08 | -5.05 | 4.38 | 0.07 |
| E1 | GY   | 4B | AX.89354374 | 5.60E+08 | 0.26 | 2.82  | 3.55 | 0.06 |
| E1 | GY   | 4B | AX.89565967 | 5.62E+08 | 0.27 | 2.94  | 3.87 | 0.07 |
| E1 | GY   | 4B | AX.89317811 | 5.31E+08 | 0.33 | 2.56  | 3.37 | 0.06 |
| E1 | GY   | 4B | AX.89607271 | 1.25E+07 | 0.06 | -4.78 | 3.08 | 0.06 |
| E1 | GY   | 4B | AX.89586334 | 6.58E+08 | 0.08 | -4.21 | 3.19 | 0.05 |
| E1 | SPM2 | 4B | AX.89436818 | 6.43E+08 | 0.32 | 18.84 | 3.48 | 0.05 |
| E1 | GY   | 4B | AX.89364224 | 6.58E+08 | 0.09 | -4.37 | 3.56 | 0.06 |
| E1 | GY   | 4B | AX.89512983 | 5.34E+08 | 0.32 | 2.53  | 3.26 | 0.06 |
| E1 | GY   | 4B | AX.89551942 | 4.44E+08 | 0.18 | 2.97  | 3.10 | 0.05 |
| E1 | SPM2 | 4B | AX.89355046 | 6.43E+08 | 0.32 | 18.63 | 3.39 | 0.05 |
| E1 | GY   | 4B | AX.89319673 | 5.32E+08 | 0.32 | 2.53  | 3.26 | 0.06 |
| E1 | GY   | 4B | AX.89323722 | 5.60E+08 | 0.26 | 2.82  | 3.55 | 0.06 |
| E1 | GY   | 4B | AX.89315775 | 5.93E+08 | 0.21 | -2.92 | 3.30 | 0.05 |
| E1 | GY   | 4B | AX.89462202 | 5.61E+08 | 0.28 | 2.57  | 3.15 | 0.06 |

|    |      |    |             |          |      |       |      |      |
|----|------|----|-------------|----------|------|-------|------|------|
| E1 | GY   | 4B | AX.89557593 | 5.62E+08 | 0.28 | 2.57  | 3.15 | 0.06 |
| E1 | SPM2 | 4B | AX.89630537 | 6.43E+08 | 0.32 | 18.63 | 3.39 | 0.05 |
| E1 | SPM2 | 4B | AX.89548012 | 6.43E+08 | 0.32 | 18.63 | 3.39 | 0.05 |
| E1 | GY   | 4B | AX.89719542 | 6.58E+08 | 0.08 | -5.05 | 4.38 | 0.07 |
| E1 | GY   | 4B | AX.89389357 | 6.58E+08 | 0.08 | -5.05 | 4.38 | 0.07 |
| E1 | GY   | 4B | AX.89433824 | 6.58E+08 | 0.08 | -5.05 | 4.38 | 0.07 |
| E1 | GY   | 4B | AX.89354461 | 5.33E+08 | 0.32 | 2.53  | 3.26 | 0.06 |
| E1 | GY   | 4B | AX.89678724 | 6.58E+08 | 0.09 | -4.37 | 3.56 | 0.06 |
| E1 | SPM2 | 4B | AX.89331813 | 6.43E+08 | 0.32 | 18.63 | 3.39 | 0.05 |
| E1 | GY   | 4B | AX.86162512 | 5.32E+08 | 0.32 | 2.53  | 3.26 | 0.06 |
| E1 | SPM2 | 4B | AX.89419542 | 6.43E+08 | 0.32 | 18.84 | 3.48 | 0.05 |
| E1 | GY   | 4B | AX.89531900 | 5.62E+08 | 0.27 | 2.94  | 3.87 | 0.07 |
| E1 | GY   | 4B | AX.89531900 | 5.62E+08 | 0.27 | 2.94  | 3.87 | 0.07 |
| E1 | GY   | 4B | AX.89450047 | 6.58E+08 | 0.09 | -4.37 | 3.56 | 0.06 |
| E1 | SPM2 | 4B | AX.89441361 | 6.43E+08 | 0.29 | 18.63 | 3.26 | 0.06 |
| E1 | GY   | 4B | AX.89667185 | 6.58E+08 | 0.08 | -5.05 | 4.38 | 0.07 |
| E1 | GY   | 4B | AX.89344272 | 4.34E+08 | 0.18 | 2.97  | 3.10 | 0.05 |
| E1 | GY   | 4B | AX.89397095 | 5.33E+08 | 0.32 | 2.53  | 3.26 | 0.06 |
| E1 | GY   | 4B | AX.89352705 | 5.31E+08 | 0.33 | 2.56  | 3.37 | 0.06 |
| E1 | GY   | 4B | AX.89611300 | 1.67E+08 | 0.39 | -2.38 | 3.17 | 0.04 |
| E1 | GY   | 4B | AX.89365086 | 5.93E+08 | 0.21 | -2.92 | 3.30 | 0.05 |
| E1 | GY   | 4B | AX.89571745 | 5.32E+08 | 0.32 | 2.53  | 3.26 | 0.06 |
| E1 | GY   | 4B | AX.89588328 | 5.62E+08 | 0.28 | 2.57  | 3.15 | 0.06 |
| E1 | GY   | 4B | AX.89397095 | 5.33E+08 | 0.32 | 2.53  | 3.26 | 0.06 |
| E1 | GY   | 4B | AX.89526867 | 6.57E+08 | 0.07 | -4.60 | 3.23 | 0.05 |
| E1 | GY   | 4B | AX.89388981 | 1.69E+08 | 0.39 | -2.31 | 3.02 | 0.04 |
| E1 | GY   | 4B | AX.89448454 | 4.28E+08 | 0.45 | 2.31  | 3.11 | 0.05 |
| E1 | GY   | 4B | AX.89331310 | 6.57E+08 | 0.07 | -4.60 | 3.23 | 0.05 |
| E1 | GY   | 4B | AX.89673916 | 5.32E+08 | 0.32 | 2.53  | 3.26 | 0.06 |
| E1 | SPM2 | 4B | AX.89517394 | 6.43E+08 | 0.32 | 18.63 | 3.39 | 0.05 |
| E1 | SPM2 | 4B | AX.86164394 | 6.43E+08 | 0.32 | 18.63 | 3.39 | 0.05 |
| E1 | GY   | 4B | AX.89492174 | 1.26E+07 | 0.05 | -6.67 | 4.41 | 0.09 |
| E1 | GY   | 4B | AX.89331903 | 6.58E+08 | 0.09 | -4.37 | 3.56 | 0.06 |
| E1 | GY   | 4B | AX.89669977 | 1.65E+08 | 0.39 | -2.38 | 3.17 | 0.04 |
| E1 | GY   | 4B | AX.89695675 | 5.32E+08 | 0.33 | 2.44  | 3.12 | 0.06 |
| E1 | GY   | 4B | AX.89508190 | 5.61E+08 | 0.26 | 2.81  | 3.48 | 0.06 |
| E1 | GY   | 4B | AX.89553918 | 1.68E+08 | 0.39 | -2.38 | 3.17 | 0.04 |
| E1 | GY   | 4B | AX.89456967 | 5.62E+08 | 0.28 | 2.57  | 3.15 | 0.06 |
| E1 | GY   | 4B | AX.89642522 | 5.32E+08 | 0.32 | 2.53  | 3.26 | 0.06 |
| E1 | GY   | 4B | AX.89355730 | 5.32E+08 | 0.32 | 2.53  | 3.26 | 0.06 |
| E1 | GY   | 4B | AX.89477195 | 5.32E+08 | 0.32 | 2.53  | 3.26 | 0.06 |
| E1 | GY   | 4B | AX.89748798 | 5.62E+08 | 0.27 | 2.94  | 3.87 | 0.07 |
| E1 | GY   | 4B | AX.89344896 | 1.62E+08 | 0.38 | -2.50 | 3.42 | 0.05 |
| E1 | GY   | 4B | AX.89626539 | 5.31E+08 | 0.33 | 2.56  | 3.37 | 0.06 |
| E1 | GY   | 4B | AX.89643271 | 5.33E+08 | 0.32 | 2.53  | 3.26 | 0.06 |
| E1 | GY   | 4B | AX.89486798 | 5.62E+08 | 0.28 | 2.57  | 3.15 | 0.06 |
| E1 | GY   | 4B | AX.89365086 | 5.93E+08 | 0.21 | -2.92 | 3.30 | 0.05 |
| E1 | SPM2 | 4B | AX.89675859 | 6.43E+08 | 0.31 | 18.99 | 3.48 | 0.05 |
| E1 | GY   | 4B | AX.89323722 | 5.60E+08 | 0.26 | 2.82  | 3.55 | 0.06 |
| E1 | GY   | 4B | AX.89746602 | 5.65E+08 | 0.29 | 2.75  | 3.58 | 0.06 |

|    |      |    |             |          |      |       |      |      |
|----|------|----|-------------|----------|------|-------|------|------|
| E1 | GY   | 4B | AX.89381343 | 5.60E+08 | 0.27 | 2.94  | 3.87 | 0.07 |
| E1 | GY   | 4B | AX.89354461 | 5.33E+08 | 0.32 | 2.53  | 3.26 | 0.06 |
| E1 | GY   | 4B | AX.89650100 | 1.31E+07 | 0.07 | -5.03 | 3.96 | 0.08 |
| E1 | GY   | 4B | AX.89476160 | 1.72E+08 | 0.39 | -2.38 | 3.17 | 0.04 |
| E1 | GY   | 4B | AX.89512983 | 5.34E+08 | 0.32 | 2.53  | 3.26 | 0.06 |
| E1 | GY   | 4B | AX.89407311 | 5.62E+08 | 0.27 | 2.94  | 3.87 | 0.07 |
| E1 | GY   | 4B | AX.89496758 | 1.65E+08 | 0.39 | -2.38 | 3.17 | 0.04 |
| E1 | GY   | 4B | AX.89729866 | 6.58E+08 | 0.09 | -4.37 | 3.56 | 0.06 |
| E1 | SPM2 | 4B | AX.89540061 | 6.43E+08 | 0.31 | 19.20 | 3.54 | 0.05 |
| E1 | GY   | 4B | AX.89683137 | 6.58E+08 | 0.09 | -4.37 | 3.56 | 0.06 |
| E1 | GY   | 4B | AX.89594799 | 4.45E+08 | 0.18 | 2.97  | 3.10 | 0.05 |
| E1 | GY   | 4B | AX.89372260 | 5.33E+08 | 0.32 | 2.53  | 3.26 | 0.06 |
| E1 | GY   | 4B | AX.89497398 | 5.32E+08 | 0.32 | 2.53  | 3.26 | 0.06 |
| E1 | GY   | 4B | AX.89336970 | 5.32E+08 | 0.32 | 2.53  | 3.26 | 0.06 |
| E1 | SPM2 | 4B | AX.89354015 | 6.43E+08 | 0.33 | 17.68 | 3.15 | 0.05 |
| E1 | GY   | 4B | AX.89494121 | 5.33E+08 | 0.32 | 2.53  | 3.26 | 0.06 |
| E1 | GY   | 4B | AX.89404249 | 5.32E+08 | 0.32 | 2.53  | 3.26 | 0.06 |
| E1 | GY   | 4B | AX.89730387 | 1.72E+08 | 0.39 | -2.38 | 3.17 | 0.04 |
| E1 | GY   | 4B | AX.89746405 | 5.42E+08 | 0.23 | 3.00  | 3.70 | 0.07 |
| E1 | GY   | 4B | AX.89361958 | 5.31E+08 | 0.33 | 2.56  | 3.37 | 0.06 |
| E1 | GY   | 4B | AX.89589070 | 5.61E+08 | 0.28 | 2.57  | 3.15 | 0.06 |
| E1 | GY   | 4B | AX.89327870 | 5.62E+08 | 0.28 | 2.57  | 3.15 | 0.06 |
| E1 | GY   | 4B | AX.89719542 | 6.58E+08 | 0.08 | -5.05 | 4.38 | 0.07 |
| E1 | GY   | 4B | AX.89557504 | 6.58E+08 | 0.08 | -5.05 | 4.38 | 0.07 |
| E1 | GY   | 4B | AX.89678724 | 6.58E+08 | 0.09 | -4.37 | 3.56 | 0.06 |
| E1 | GY   | 4B | AX.89516995 | 2.86E+08 | 0.35 | -2.37 | 3.04 | 0.04 |
| E1 | GY   | 4B | AX.89516995 | 2.86E+08 | 0.35 | -2.37 | 3.04 | 0.04 |
| E1 | GY   | 4B | AX.89400160 | 5.92E+08 | 0.26 | 2.86  | 3.60 | 0.06 |
| E1 | GY   | 4B | AX.89330007 | 6.58E+08 | 0.08 | -4.18 | 3.16 | 0.05 |
| E1 | GY   | 4B | AX.89571745 | 5.32E+08 | 0.32 | 2.53  | 3.26 | 0.06 |
| E1 | GY   | 4B | AX.89384581 | 1.31E+07 | 0.07 | -5.40 | 4.25 | 0.08 |
| E1 | GY   | 4B | AX.89541555 | 1.31E+07 | 0.05 | -6.46 | 4.17 | 0.08 |
| E1 | GY   | 4B | AX.89331310 | 6.57E+08 | 0.07 | -4.60 | 3.23 | 0.05 |
| E1 | GY   | 4B | AX.89660931 | 1.55E+08 | 0.38 | -2.33 | 3.02 | 0.04 |
| E1 | GY   | 4B | AX.89661370 | 5.62E+08 | 0.27 | 3.06  | 4.17 | 0.08 |
| E1 | GY   | 4B | AX.89414000 | 5.62E+08 | 0.27 | 2.94  | 3.87 | 0.07 |
| E1 | GY   | 4B | AX.89492174 | 1.26E+07 | 0.05 | -6.67 | 4.41 | 0.09 |
| E1 | GY   | 4B | AX.89555995 | 5.93E+08 | 0.21 | -2.92 | 3.30 | 0.05 |
| E1 | GY   | 4B | AX.89331903 | 6.58E+08 | 0.09 | -4.37 | 3.56 | 0.06 |
| E1 | GY   | 4B | AX.89650100 | 1.31E+07 | 0.07 | -5.03 | 3.96 | 0.08 |
| E1 | GY   | 4B | AX.89508190 | 5.61E+08 | 0.26 | 2.81  | 3.48 | 0.06 |
| E1 | GY   | 4B | AX.89508272 | 5.62E+08 | 0.28 | 2.57  | 3.15 | 0.06 |
| E1 | GY   | 4B | AX.89508272 | 5.62E+08 | 0.28 | 2.57  | 3.15 | 0.06 |
| E1 | SPM2 | 4B | AX.89514174 | 6.43E+08 | 0.32 | 18.63 | 3.39 | 0.05 |
| E1 | GY   | 4B | AX.89472483 | 5.62E+08 | 0.27 | 2.84  | 3.70 | 0.07 |
| E1 | GY   | 4B | AX.89752270 | 5.31E+08 | 0.33 | 2.56  | 3.37 | 0.06 |
| E1 | GY   | 4B | AX.89622164 | 3.44E+08 | 0.28 | 2.73  | 3.52 | 0.06 |
| E1 | GY   | 4B | AX.89380326 | 5.62E+08 | 0.25 | 2.71  | 3.24 | 0.06 |
| E1 | GY   | 4B | AX.89330007 | 6.58E+08 | 0.08 | -4.18 | 3.16 | 0.05 |
| E1 | GY   | 4B | AX.89486798 | 5.62E+08 | 0.28 | 2.57  | 3.15 | 0.06 |

|    |      |    |             |          |      |       |      |      |
|----|------|----|-------------|----------|------|-------|------|------|
| E1 | GY   | 4B | AX.89551942 | 4.44E+08 | 0.18 | 2.97  | 3.10 | 0.05 |
| E1 | GY   | 4B | AX.89487605 | 5.62E+08 | 0.32 | 3.37  | 5.35 | 0.10 |
| E1 | SPM2 | 4B | AX.89363554 | 6.43E+08 | 0.32 | 18.63 | 3.39 | 0.05 |
| E1 | GY   | 4B | AX.89776240 | 5.31E+08 | 0.33 | 2.56  | 3.37 | 0.06 |
| E1 | GY   | 4B | AX.89381343 | 5.60E+08 | 0.27 | 2.94  | 3.87 | 0.07 |
| E1 | GY   | 4B | AX.89475860 | 5.32E+08 | 0.32 | 2.53  | 3.26 | 0.06 |
| E1 | GY   | 4B | AX.89557593 | 5.62E+08 | 0.28 | 2.57  | 3.15 | 0.06 |
| E1 | GY   | 4B | AX.89678567 | 5.32E+08 | 0.32 | 2.53  | 3.26 | 0.06 |
| E1 | GY   | 4B | AX.89476160 | 1.72E+08 | 0.39 | -2.38 | 3.17 | 0.04 |
| E1 | GY   | 4B | AX.89371502 | 5.37E+08 | 0.23 | 3.00  | 3.70 | 0.07 |
| E1 | GY   | 4B | AX.89313869 | 4.44E+08 | 0.18 | 2.97  | 3.10 | 0.05 |
| E1 | GY   | 4B | AX.89313869 | 4.44E+08 | 0.18 | 2.97  | 3.10 | 0.05 |
| E1 | GY   | 4B | AX.89667145 | 1.68E+08 | 0.39 | -2.38 | 3.17 | 0.04 |
| E1 | GY   | 4B | AX.89667145 | 1.68E+08 | 0.39 | -2.38 | 3.17 | 0.04 |
| E1 | GY   | 4B | AX.89430932 | 6.58E+08 | 0.09 | -4.90 | 4.33 | 0.07 |
| E1 | GY   | 4B | AX.89430932 | 6.58E+08 | 0.09 | -4.90 | 4.33 | 0.07 |
| E1 | GY   | 4B | AX.89642522 | 5.32E+08 | 0.32 | 2.53  | 3.26 | 0.06 |
| E1 | GY   | 4B | AX.89594799 | 4.45E+08 | 0.18 | 2.97  | 3.10 | 0.05 |
| E1 | GY   | 4B | AX.89347833 | 5.62E+08 | 0.28 | 2.57  | 3.15 | 0.06 |
| E1 | GY   | 4B | AX.89626357 | 5.33E+08 | 0.32 | 2.53  | 3.26 | 0.06 |
| E1 | GY   | 4B | AX.89626371 | 1.66E+08 | 0.39 | -2.38 | 3.17 | 0.04 |
| E1 | GY   | 4B | AX.89647330 | 5.61E+08 | 0.26 | 2.82  | 3.55 | 0.06 |
| E1 | GY   | 4B | AX.89361217 | 5.33E+08 | 0.32 | 2.53  | 3.26 | 0.06 |
| E1 | GY   | 4B | AX.89361217 | 5.33E+08 | 0.32 | 2.53  | 3.26 | 0.06 |
| E1 | GY   | 4B | AX.89315775 | 5.93E+08 | 0.21 | -2.92 | 3.30 | 0.05 |
| E1 | GY   | 4B | AX.89349390 | 5.88E+08 | 0.25 | 2.92  | 3.69 | 0.07 |
| E1 | GY   | 4B | AX.89705801 | 6.58E+08 | 0.09 | -4.37 | 3.56 | 0.06 |
| E1 | GY   | 4B | AX.89533727 | 5.33E+08 | 0.32 | 2.53  | 3.26 | 0.06 |
| E1 | GY   | 4B | AX.89316538 | 5.62E+08 | 0.27 | 3.00  | 3.99 | 0.07 |
| E1 | GY   | 4B | AX.89316538 | 5.62E+08 | 0.27 | 3.00  | 3.99 | 0.07 |
| E1 | GY   | 4B | AX.89361958 | 5.31E+08 | 0.33 | 2.56  | 3.37 | 0.06 |
| E1 | GY   | 4B | AX.89467069 | 5.33E+08 | 0.32 | 2.59  | 3.41 | 0.06 |
| E1 | SPM2 | 4B | AX.89621268 | 6.43E+08 | 0.32 | 18.63 | 3.39 | 0.05 |
| E1 | GY   | 4B | AX.89327870 | 5.62E+08 | 0.28 | 2.57  | 3.15 | 0.06 |
| E1 | GY   | 4B | AX.89669348 | 5.60E+08 | 0.26 | 2.82  | 3.55 | 0.06 |
| E1 | GY   | 4B | AX.89743825 | 5.32E+08 | 0.32 | 2.53  | 3.26 | 0.06 |
| E1 | GY   | 4B | AX.89598047 | 1.68E+08 | 0.39 | -2.38 | 3.17 | 0.04 |
| E1 | GY   | 4B | AX.89647006 | 5.61E+08 | 0.23 | 2.91  | 3.50 | 0.06 |
| E1 | GY   | 4B | AX.89754106 | 5.32E+08 | 0.32 | 2.53  | 3.26 | 0.06 |
| E1 | GY   | 4B | AX.89319673 | 5.32E+08 | 0.32 | 2.53  | 3.26 | 0.06 |
| E1 | GY   | 4B | AX.89564249 | 5.33E+08 | 0.32 | 2.53  | 3.26 | 0.06 |
| E1 | GY   | 4B | AX.89698141 | 1.51E+08 | 0.38 | -2.50 | 3.42 | 0.05 |
| E1 | GY   | 4B | AX.89541555 | 1.31E+07 | 0.05 | -6.46 | 4.17 | 0.08 |
| E1 | GY   | 4B | AX.89448454 | 4.28E+08 | 0.45 | 2.31  | 3.11 | 0.05 |
| E1 | GY   | 4B | AX.89673916 | 5.32E+08 | 0.32 | 2.53  | 3.26 | 0.06 |
| E1 | GY   | 4B | AX.89760506 | 5.32E+08 | 0.32 | 2.53  | 3.26 | 0.06 |
| E1 | GY   | 4B | AX.89624445 | 5.33E+08 | 0.32 | 2.53  | 3.26 | 0.06 |
| E1 | GY   | 4B | AX.89772648 | 5.21E+08 | 0.23 | 3.08  | 3.85 | 0.07 |
| E1 | GY   | 4B | AX.89378611 | 1.60E+08 | 0.39 | -2.38 | 3.17 | 0.04 |
| E1 | GY   | 4B | AX.89529379 | 5.33E+08 | 0.32 | 2.53  | 3.26 | 0.06 |

|    |      |    |             |          |      |       |      |      |
|----|------|----|-------------|----------|------|-------|------|------|
| E1 | GY   | 4B | AX.89529379 | 5.33E+08 | 0.32 | 2.53  | 3.26 | 0.06 |
| E1 | GY   | 4B | AX.89496758 | 1.65E+08 | 0.39 | -2.38 | 3.17 | 0.04 |
| E1 | GY   | 4B | AX.89450047 | 6.58E+08 | 0.09 | -4.37 | 3.56 | 0.06 |
| E1 | GY   | 4B | AX.89344272 | 4.34E+08 | 0.18 | 2.97  | 3.10 | 0.05 |
| E1 | GY   | 4B | AX.89672975 | 5.60E+08 | 0.26 | 2.82  | 3.55 | 0.06 |
| E1 | GY   | 4B | AX.89497126 | 5.32E+08 | 0.32 | 2.53  | 3.26 | 0.06 |
| E1 | GY   | 4B | AX.89497126 | 5.32E+08 | 0.32 | 2.53  | 3.26 | 0.06 |
| E1 | SPM2 | 4B | AX.89459544 | 6.43E+08 | 0.33 | 18.63 | 3.48 | 0.05 |
| E1 | GY   | 4B | AX.89578164 | 5.33E+08 | 0.32 | 2.53  | 3.26 | 0.06 |
| E1 | GY   | 4B | AX.89599903 | 4.44E+08 | 0.18 | 2.97  | 3.10 | 0.05 |
| E1 | GY   | 4B | AX.89733183 | 5.93E+08 | 0.21 | -2.92 | 3.30 | 0.05 |
| E1 | GY   | 4B | AX.89628533 | 5.32E+08 | 0.32 | 2.53  | 3.26 | 0.06 |
| E1 | GY   | 4B | AX.89512685 | 5.87E+08 | 0.25 | 2.92  | 3.69 | 0.07 |
| E1 | GY   | 4B | AX.89462202 | 5.61E+08 | 0.28 | 2.57  | 3.15 | 0.06 |
| E1 | GY   | 4B | AX.89556208 | 1.26E+07 | 0.05 | -6.12 | 4.11 | 0.08 |
| E1 | GY   | 4B | AX.89753877 | 1.26E+07 | 0.07 | -5.03 | 3.96 | 0.08 |
| E1 | GY   | 4B | AX.89433900 | 5.33E+08 | 0.32 | 2.53  | 3.26 | 0.06 |
| E1 | SPM2 | 4B | AX.89310409 | 6.43E+08 | 0.32 | 18.13 | 3.25 | 0.05 |
| E1 | GY   | 4B | AX.89535038 | 5.58E+08 | 0.26 | 2.89  | 3.66 | 0.07 |
| E1 | GY   | 4B | AX.89607271 | 1.25E+07 | 0.06 | -4.78 | 3.08 | 0.06 |
| E1 | GY   | 4B | AX.89594770 | 5.95E+07 | 0.36 | 2.58  | 3.56 | 0.06 |
| E1 | GY   | 4B | AX.89717411 | 1.28E+07 | 0.07 | -5.69 | 4.66 | 0.09 |
| E1 | GY   | 4B | AX.89717411 | 1.28E+07 | 0.07 | -5.69 | 4.66 | 0.09 |
| E1 | GY   | 4B | AX.89419922 | 5.32E+08 | 0.32 | 2.53  | 3.26 | 0.06 |
| E1 | GY   | 4B | AX.89419922 | 5.32E+08 | 0.32 | 2.53  | 3.26 | 0.06 |
| E1 | GY   | 4B | AX.89718135 | 5.31E+08 | 0.33 | 2.56  | 3.37 | 0.06 |
| E1 | GY   | 4B | AX.89384581 | 1.31E+07 | 0.07 | -5.40 | 4.25 | 0.08 |
| E1 | GY   | 4B | AX.89604472 | 6.58E+08 | 0.09 | -4.26 | 3.54 | 0.06 |
| E1 | GY   | 4B | AX.89526867 | 6.57E+08 | 0.07 | -4.60 | 3.23 | 0.05 |
| E1 | GY   | 4B | AX.89730387 | 1.72E+08 | 0.39 | -2.38 | 3.17 | 0.04 |
| E1 | GY   | 4B | AX.89718911 | 6.58E+08 | 0.09 | -4.37 | 3.56 | 0.06 |
| E1 | GY   | 4B | AX.89604960 | 5.31E+08 | 0.33 | 2.56  | 3.37 | 0.06 |
| E1 | GY   | 4B | AX.89669348 | 5.60E+08 | 0.26 | 2.82  | 3.55 | 0.06 |
| E1 | GY   | 4B | AX.89584687 | 5.63E+08 | 0.29 | 2.75  | 3.58 | 0.06 |
| E1 | GY   | 4B | AX.89763483 | 6.58E+08 | 0.08 | -5.05 | 4.38 | 0.07 |
| E1 | GY   | 4B | AX.89669977 | 1.65E+08 | 0.39 | -2.38 | 3.17 | 0.04 |
| E1 | GY   | 4B | AX.89682209 | 5.33E+08 | 0.32 | 2.53  | 3.26 | 0.06 |
| E1 | GY   | 4B | AX.89422596 | 3.75E+08 | 0.28 | 2.73  | 3.52 | 0.06 |
| E1 | GY   | 4B | AX.89400160 | 5.92E+08 | 0.26 | 2.86  | 3.60 | 0.06 |
| E1 | GY   | 4B | AX.89352705 | 5.31E+08 | 0.33 | 2.56  | 3.37 | 0.06 |
| E1 | GY   | 4B | AX.89753877 | 1.26E+07 | 0.07 | -5.03 | 3.96 | 0.08 |
| E1 | GY   | 4B | AX.89589070 | 5.61E+08 | 0.28 | 2.57  | 3.15 | 0.06 |
| E1 | GY   | 4B | AX.89377927 | 5.32E+08 | 0.32 | 2.53  | 3.26 | 0.06 |
| E1 | GY   | 4B | AX.89507152 | 5.30E+08 | 0.16 | -3.12 | 3.08 | 0.07 |
| E1 | GY   | 4B | AX.89354374 | 5.60E+08 | 0.26 | 2.82  | 3.55 | 0.06 |
| E1 | GY   | 4B | AX.89422024 | 5.33E+08 | 0.32 | 2.53  | 3.26 | 0.06 |
| E1 | SPM2 | 4B | AX.89420848 | 6.43E+08 | 0.32 | 18.63 | 3.39 | 0.05 |
| E1 | GY   | 4B | AX.89712333 | 5.93E+08 | 0.21 | -2.92 | 3.30 | 0.05 |
| E1 | GY   | 4B | AX.89712333 | 5.93E+08 | 0.21 | -2.92 | 3.30 | 0.05 |
| E1 | GY   | 4B | AX.89355602 | 6.58E+08 | 0.08 | -5.05 | 4.38 | 0.07 |

|    |      |    |             |          |      |       |      |      |
|----|------|----|-------------|----------|------|-------|------|------|
| E1 | GY   | 4B | AX.89355730 | 5.32E+08 | 0.32 | 2.53  | 3.26 | 0.06 |
| E1 | GY   | 4B | AX.89626371 | 1.66E+08 | 0.39 | -2.38 | 3.17 | 0.04 |
| E1 | GY   | 4B | AX.89497398 | 5.32E+08 | 0.32 | 2.53  | 3.26 | 0.06 |
| E1 | GY   | 4B | AX.89404249 | 5.32E+08 | 0.32 | 2.53  | 3.26 | 0.06 |
| E1 | GY   | 4B | AX.89462337 | 5.89E+07 | 0.37 | 2.38  | 3.11 | 0.06 |
| E1 | GY   | 4B | AX.89642919 | 5.33E+08 | 0.32 | 2.53  | 3.26 | 0.06 |
| E1 | GY   | 4B | AX.89616304 | 5.60E+08 | 0.26 | 2.82  | 3.55 | 0.06 |
| E1 | GY   | 4B | AX.89771775 | 6.58E+08 | 0.09 | -4.37 | 3.56 | 0.06 |
| E1 | GY   | 4B | AX.89616929 | 5.71E+08 | 0.28 | 2.57  | 3.14 | 0.06 |
| E1 | GY   | 4B | AX.89723602 | 5.31E+08 | 0.33 | 2.56  | 3.37 | 0.06 |
| E1 | GY   | 4B | AX.89476043 | 6.58E+08 | 0.09 | -4.86 | 4.45 | 0.07 |
| E1 | GY   | 4B | AX.89678567 | 5.32E+08 | 0.32 | 2.53  | 3.26 | 0.06 |
| E1 | GY   | 4B | AX.89667185 | 6.58E+08 | 0.08 | -5.05 | 4.38 | 0.07 |
| E1 | GY   | 4B | AX.89347833 | 5.62E+08 | 0.28 | 2.57  | 3.15 | 0.06 |
| E1 | SPM2 | 4B | AX.89566393 | 6.44E+08 | 0.47 | 16.20 | 3.01 | 0.05 |
| E1 | GY   | 4B | AX.89729025 | 4.39E+08 | 0.18 | 2.97  | 3.10 | 0.05 |
| E1 | GY   | 4B | AX.89729025 | 4.39E+08 | 0.18 | 2.97  | 3.10 | 0.05 |
| E1 | GY   | 4B | AX.89683540 | 5.62E+08 | 0.26 | 2.75  | 3.39 | 0.06 |
| E1 | GY   | 4B | AX.89344798 | 5.33E+08 | 0.32 | 2.53  | 3.26 | 0.06 |
| E1 | GY   | 4B | AX.89372260 | 5.33E+08 | 0.32 | 2.53  | 3.26 | 0.06 |
| E1 | GY   | 4B | AX.89655632 | 1.60E+08 | 0.44 | -2.29 | 3.06 | 0.04 |
| E1 | GY   | 4B | AX.89701032 | 6.58E+08 | 0.07 | -4.88 | 3.76 | 0.06 |
| E1 | GY   | 4B | AX.89439700 | 5.31E+08 | 0.33 | 2.56  | 3.37 | 0.06 |
| E1 | GPS  | 4B | AX.89487605 | 5.62E+08 | 0.32 | 1.33  | 3.78 | 0.07 |
| E1 | GY   | 4B | AX.89478754 | 5.31E+08 | 0.33 | 2.56  | 3.37 | 0.06 |
| E1 | GY   | 4B | AX.89514930 | 5.33E+08 | 0.32 | 2.53  | 3.26 | 0.06 |
| E1 | GY   | 4B | AX.89514930 | 5.33E+08 | 0.32 | 2.53  | 3.26 | 0.06 |
| E1 | GY   | 4B | AX.89681180 | 5.31E+08 | 0.33 | 2.56  | 3.37 | 0.06 |
| E1 | GY   | 4B | AX.89681180 | 5.31E+08 | 0.33 | 2.56  | 3.37 | 0.06 |
| E1 | GY   | 4B | AX.89549282 | 5.33E+08 | 0.32 | 2.53  | 3.26 | 0.06 |
| E1 | GY   | 4B | AX.89483878 | 5.93E+08 | 0.21 | -2.92 | 3.30 | 0.05 |
| E1 | GY   | 4B | AX.89557504 | 6.58E+08 | 0.08 | -5.05 | 4.38 | 0.07 |
| E1 | GY   | 4B | AX.89580725 | 5.33E+08 | 0.32 | 2.53  | 3.26 | 0.06 |
| E1 | GY   | 4B | AX.89695675 | 5.32E+08 | 0.33 | 2.44  | 3.12 | 0.06 |
| E1 | GY   | 4B | AX.89682209 | 5.33E+08 | 0.32 | 2.53  | 3.26 | 0.06 |
| E1 | GPS  | 4B | AX.89331813 | 6.43E+08 | 0.32 | -1.19 | 3.13 | 0.05 |
| E1 | GY   | 4B | AX.89637611 | 5.31E+08 | 0.33 | 2.56  | 3.37 | 0.06 |
| E1 | GPS  | 4B | AX.89675859 | 6.43E+08 | 0.31 | -1.22 | 3.26 | 0.06 |
| E1 | GY   | 4B | AX.89364224 | 6.58E+08 | 0.09 | -4.37 | 3.56 | 0.06 |
| E1 | GY   | 4B | AX.89769229 | 5.31E+08 | 0.33 | 2.56  | 3.37 | 0.06 |
| E1 | GY   | 4B | AX.89611300 | 1.67E+08 | 0.39 | -2.38 | 3.17 | 0.04 |
| E1 | GY   | 4B | AX.89401081 | 5.31E+08 | 0.33 | 2.56  | 3.37 | 0.06 |
| E1 | GY   | 4B | AX.89376848 | 2.15E+08 | 0.28 | 2.73  | 3.52 | 0.06 |
| E1 | GY   | 4B | AX.89757114 | 5.31E+08 | 0.33 | 2.56  | 3.37 | 0.06 |
| E1 | GY   | 4B | AX.89757114 | 5.31E+08 | 0.33 | 2.56  | 3.37 | 0.06 |
| E1 | GY   | 4B | AX.89648611 | 6.57E+08 | 0.07 | -4.60 | 3.23 | 0.05 |
| E1 | GY   | 4B | AX.89576163 | 5.31E+08 | 0.33 | 2.56  | 3.40 | 0.06 |
| E1 | GY   | 4B | AX.89576163 | 5.31E+08 | 0.33 | 2.56  | 3.40 | 0.06 |
| E1 | GY   | 4B | AX.89661370 | 5.62E+08 | 0.27 | 3.06  | 4.17 | 0.08 |
| E1 | GY   | 4B | AX.89414000 | 5.62E+08 | 0.27 | 2.94  | 3.87 | 0.07 |



|    |     |    |             |          |      |       |      |      |
|----|-----|----|-------------|----------|------|-------|------|------|
| E1 | GPS | 4B | AX.89310409 | 6.43E+08 | 0.32 | -1.19 | 3.15 | 0.05 |
| E1 | GY  | 4B | AX.89472483 | 5.62E+08 | 0.27 | 2.84  | 3.70 | 0.07 |
| E1 | GY  | 4B | AX.89672975 | 5.60E+08 | 0.26 | 2.82  | 3.55 | 0.06 |
| E1 | GY  | 4B | AX.89415532 | 5.32E+08 | 0.32 | 2.53  | 3.26 | 0.06 |
| E1 | GY  | 4B | AX.89415532 | 5.32E+08 | 0.32 | 2.53  | 3.26 | 0.06 |
| E1 | GY  | 4B | AX.89578164 | 5.33E+08 | 0.32 | 2.53  | 3.26 | 0.06 |
| E1 | GY  | 4B | AX.89512685 | 5.87E+08 | 0.25 | 2.92  | 3.69 | 0.07 |
| E1 | GY  | 4B | AX.89725528 | 5.88E+08 | 0.25 | 2.92  | 3.69 | 0.07 |
| E1 | GY  | 4B | AX.89725528 | 5.88E+08 | 0.25 | 2.92  | 3.69 | 0.07 |
| E1 | GY  | 4B | AX.89487605 | 5.62E+08 | 0.32 | 3.37  | 5.35 | 0.10 |
| E1 | GY  | 4B | AX.89556208 | 1.26E+07 | 0.05 | -6.12 | 4.11 | 0.08 |
| E1 | GY  | 4B | AX.89776240 | 5.31E+08 | 0.33 | 2.56  | 3.37 | 0.06 |
| E1 | GY  | 4B | AX.89653815 | 5.60E+08 | 0.26 | 2.74  | 3.37 | 0.06 |
| E1 | GY  | 4B | AX.89653815 | 5.60E+08 | 0.26 | 2.74  | 3.37 | 0.06 |
| E1 | GY  | 4B | AX.89512210 | 6.57E+08 | 0.07 | -4.60 | 3.23 | 0.05 |
| E1 | GPS | 4B | AX.89363554 | 6.43E+08 | 0.32 | -1.19 | 3.13 | 0.05 |
| E1 | GY  | 4B | AX.89430244 | 5.31E+08 | 0.33 | 2.56  | 3.37 | 0.06 |
| E1 | GY  | 4B | AX.89561827 | 5.32E+08 | 0.32 | 2.53  | 3.26 | 0.06 |
| E1 | GY  | 4B | AX.89452772 | 5.62E+08 | 0.27 | 2.99  | 4.04 | 0.07 |
| E1 | GY  | 4B | AX.89371502 | 5.37E+08 | 0.23 | 3.00  | 3.70 | 0.07 |
| E1 | GY  | 4B | AX.89586202 | 6.58E+08 | 0.09 | -4.37 | 3.56 | 0.06 |
| E1 | GY  | 4B | AX.89657621 | 5.32E+08 | 0.32 | 2.53  | 3.26 | 0.06 |
| E1 | GPS | 4B | AX.89354015 | 6.43E+08 | 0.33 | -1.17 | 3.12 | 0.05 |
| E1 | GY  | 4B | AX.89683137 | 6.58E+08 | 0.09 | -4.37 | 3.56 | 0.06 |
| E1 | GY  | 4B | AX.89594770 | 5.95E+07 | 0.36 | 2.58  | 3.56 | 0.06 |
| E1 | GPS | 4B | AX.89621268 | 6.43E+08 | 0.32 | -1.19 | 3.13 | 0.05 |
| E1 | GPS | 4B | AX.89514174 | 6.43E+08 | 0.32 | -1.19 | 3.13 | 0.05 |
| E1 | GY  | 4B | AX.89626357 | 5.33E+08 | 0.32 | 2.53  | 3.26 | 0.06 |
| E1 | GY  | 4B | AX.89344798 | 5.33E+08 | 0.32 | 2.53  | 3.26 | 0.06 |
| E1 | GY  | 4B | AX.89655632 | 1.60E+08 | 0.44 | -2.29 | 3.06 | 0.04 |
| E1 | GY  | 4B | AX.89566116 | 1.60E+08 | 0.38 | -2.33 | 3.02 | 0.04 |
| E1 | GY  | 4B | AX.89762659 | 5.93E+07 | 0.36 | 2.58  | 3.56 | 0.06 |
| E1 | GY  | 4B | AX.89604472 | 6.58E+08 | 0.09 | -4.26 | 3.54 | 0.06 |
| E1 | GY  | 4B | AX.89533727 | 5.33E+08 | 0.32 | 2.53  | 3.26 | 0.06 |
| E1 | GY  | 4B | AX.89316572 | 1.33E+07 | 0.05 | -5.41 | 3.32 | 0.05 |
| E1 | GY  | 4B | AX.89338729 | 5.33E+08 | 0.32 | 2.53  | 3.26 | 0.06 |
| E1 | GY  | 4B | AX.89641200 | 6.58E+08 | 0.12 | -3.58 | 3.12 | 0.06 |
| E1 | GY  | 4B | AX.89445900 | 6.58E+08 | 0.09 | -4.26 | 3.54 | 0.06 |
| E1 | GY  | 4B | AX.89445900 | 6.58E+08 | 0.09 | -4.26 | 3.54 | 0.06 |
| E1 | GY  | 4B | AX.89671108 | 6.57E+08 | 0.07 | -4.60 | 3.23 | 0.05 |
| E1 | GY  | 4B | AX.89671108 | 6.57E+08 | 0.07 | -4.60 | 3.23 | 0.05 |
| E1 | GY  | 4B | AX.89422596 | 3.75E+08 | 0.28 | 2.73  | 3.52 | 0.06 |
| E1 | GY  | 4B | AX.89456967 | 5.62E+08 | 0.28 | 2.57  | 3.15 | 0.06 |
| E1 | GY  | 4B | AX.89636790 | 6.58E+08 | 0.09 | -4.37 | 3.56 | 0.06 |
| E1 | GY  | 4B | AX.89769229 | 5.31E+08 | 0.33 | 2.56  | 3.37 | 0.06 |
| E1 | GY  | 4B | AX.89733183 | 5.93E+08 | 0.21 | -2.92 | 3.30 | 0.05 |
| E1 | GY  | 4B | AX.89529468 | 5.32E+08 | 0.32 | 2.53  | 3.26 | 0.06 |
| E1 | GY  | 4B | AX.89647006 | 5.61E+08 | 0.23 | 2.91  | 3.50 | 0.06 |
| E1 | GY  | 4B | AX.89454237 | 5.62E+08 | 0.28 | 2.57  | 3.15 | 0.06 |
| E1 | GY  | 4B | AX.89570782 | 5.32E+08 | 0.32 | 2.53  | 3.26 | 0.06 |

|    |      |    |             |          |      |         |      |      |
|----|------|----|-------------|----------|------|---------|------|------|
| E1 | GY   | 4B | AX.89754106 | 5.32E+08 | 0.32 | 2.53    | 3.26 | 0.06 |
| E1 | GPS  | 4B | AX.89689341 | 6.43E+08 | 0.32 | -1.19   | 3.13 | 0.05 |
| E1 | GY   | 4B | AX.89564249 | 5.33E+08 | 0.32 | 2.53    | 3.26 | 0.06 |
| E1 | GY   | 4B | AX.89436365 | 5.32E+08 | 0.32 | 2.53    | 3.26 | 0.06 |
| E1 | GY   | 4B | AX.89706082 | 5.33E+08 | 0.32 | 2.53    | 3.26 | 0.06 |
| E1 | GY   | 4B | AX.89698141 | 1.51E+08 | 0.38 | -2.50   | 3.42 | 0.05 |
| E1 | GY   | 4B | AX.89711784 | 6.58E+08 | 0.09 | -4.37   | 3.56 | 0.06 |
| E1 | GY   | 4B | AX.89746405 | 5.42E+08 | 0.23 | 3.00    | 3.70 | 0.07 |
| E1 | GY   | 4B | AX.89757410 | 5.62E+08 | 0.27 | 2.94    | 3.87 | 0.07 |
| E1 | GY   | 4B | AX.89757410 | 5.62E+08 | 0.27 | 2.94    | 3.87 | 0.07 |
| E1 | GY   | 4B | AX.89760506 | 5.32E+08 | 0.32 | 2.53    | 3.26 | 0.06 |
| E1 | GY   | 4B | AX.89624445 | 5.33E+08 | 0.32 | 2.53    | 3.26 | 0.06 |
| E1 | GY   | 4B | AX.89681781 | 5.31E+08 | 0.33 | 2.56    | 3.37 | 0.06 |
| E1 | GY   | 4B | AX.89772648 | 5.21E+08 | 0.23 | 3.08    | 3.85 | 0.07 |
| E1 | GY   | 4B | AX.89565967 | 5.62E+08 | 0.27 | 2.94    | 3.87 | 0.07 |
| E1 | GY   | 4B | AX.89624995 | 6.13E+08 | 0.48 | -2.38   | 3.31 | 0.06 |
| E1 | GY   | 4B | AX.89764432 | 5.33E+08 | 0.32 | 2.53    | 3.26 | 0.06 |
| E1 | GY   | 4B | AX.89764432 | 5.33E+08 | 0.32 | 2.53    | 3.26 | 0.06 |
| E1 | GY   | 4B | AX.89493063 | 6.57E+08 | 0.07 | -4.60   | 3.23 | 0.05 |
| E1 | GY   | 4B | AX.89599903 | 4.44E+08 | 0.18 | 2.97    | 3.10 | 0.05 |
| E1 | GY   | 4B | AX.89628533 | 5.32E+08 | 0.32 | 2.53    | 3.26 | 0.06 |
| E1 | GY   | 4B | AX.89680445 | 5.32E+08 | 0.32 | 2.53    | 3.26 | 0.06 |
| E1 | GY   | 4B | AX.89748792 | 5.31E+08 | 0.33 | 2.56    | 3.37 | 0.06 |
| E1 | GY   | 4B | AX.89748798 | 5.62E+08 | 0.27 | 2.94    | 3.87 | 0.07 |
| E1 | GY   | 4B | AX.89626539 | 5.31E+08 | 0.33 | 2.56    | 3.37 | 0.06 |
| E1 | GY   | 4B | AX.89462337 | 5.89E+07 | 0.37 | 2.38    | 3.11 | 0.06 |
| E1 | GY   | 4B | AX.89688994 | 5.33E+08 | 0.32 | 2.53    | 3.26 | 0.06 |
| E1 | GY   | 4B | AX.89433900 | 5.33E+08 | 0.32 | 2.53    | 3.26 | 0.06 |
| E1 | GY   | 4B | AX.89534566 | 5.62E+08 | 0.28 | 2.64    | 3.31 | 0.06 |
| E1 | GY   | 4B | AX.89637901 | 6.58E+08 | 0.08 | -4.98   | 4.09 | 0.07 |
| E1 | GY   | 4B | AX.89637901 | 6.58E+08 | 0.08 | -4.98   | 4.09 | 0.07 |
| E1 | GY   | 4B | AX.89465158 | 6.58E+08 | 0.09 | -4.37   | 3.56 | 0.06 |
| E1 | GY   | 4B | AX.89497508 | 5.32E+08 | 0.32 | 2.53    | 3.26 | 0.06 |
| E1 | GY   | 4B | AX.89762659 | 5.93E+07 | 0.36 | 2.58    | 3.56 | 0.06 |
| E1 | GY   | 4B | AX.89718911 | 6.58E+08 | 0.09 | -4.37   | 3.56 | 0.06 |
| E1 | GY   | 4B | AX.89467069 | 5.33E+08 | 0.32 | 2.59    | 3.41 | 0.06 |
| E1 | GY   | 4B | AX.89604960 | 5.31E+08 | 0.33 | 2.56    | 3.37 | 0.06 |
| E1 | GY   | 4B | AX.89584687 | 5.63E+08 | 0.29 | 2.75    | 3.58 | 0.06 |
| E1 | GY   | 4B | AX.89598047 | 1.68E+08 | 0.39 | -2.38   | 3.17 | 0.04 |
| E1 | GY   | 4B | AX.89667528 | 1.68E+08 | 0.39 | -2.38   | 3.17 | 0.04 |
| E1 | GY   | 4B | AX.89667528 | 1.68E+08 | 0.39 | -2.38   | 3.17 | 0.04 |
| E1 | GY   | 4B | AX.89529468 | 5.32E+08 | 0.32 | 2.53    | 3.26 | 0.06 |
| E1 | GY   | 4B | AX.89570782 | 5.32E+08 | 0.32 | 2.53    | 3.26 | 0.06 |
| E1 | GY   | 4B | AX.89494121 | 5.33E+08 | 0.32 | 2.53    | 3.26 | 0.06 |
| E1 | GY   | 4B | AX.89401081 | 5.31E+08 | 0.33 | 2.56    | 3.37 | 0.06 |
| E1 | GPM2 | 4B | AX.89375117 | 9.26E+07 | 0.43 | -706.57 | 4.20 | 0.07 |
| E1 | GPM2 | 4B | AX.89414452 | 5.34E+08 | 0.23 | -779.68 | 3.73 | 0.06 |
| E1 | GPM2 | 4B | AX.89647006 | 5.61E+08 | 0.23 | 759.59  | 3.61 | 0.06 |
| E1 | GPM2 | 4B | AX.89354231 | 9.02E+07 | 0.43 | -706.57 | 4.20 | 0.07 |
| E1 | GPM2 | 4B | AX.89588328 | 5.62E+08 | 0.28 | 742.19  | 3.85 | 0.07 |

|    |      |    |             |          |      |         |      |      |
|----|------|----|-------------|----------|------|---------|------|------|
| E1 | GPM2 | 4B | AX.89690592 | 5.34E+08 | 0.23 | -779.68 | 3.73 | 0.06 |
| E1 | GPM2 | 4B | AX.89719857 | 5.35E+08 | 0.28 | -677.27 | 3.31 | 0.06 |
| E1 | GY   | 4B | AX.89746602 | 5.65E+08 | 0.29 | 2.75    | 3.58 | 0.06 |
| E1 | GPM2 | 4B | AX.89589070 | 5.61E+08 | 0.28 | 742.19  | 3.85 | 0.07 |
| E1 | GY   | 4B | AX.89507152 | 5.30E+08 | 0.16 | -3.12   | 3.08 | 0.07 |
| E1 | GPM2 | 4B | AX.89337612 | 5.34E+08 | 0.23 | -779.68 | 3.73 | 0.06 |
| E1 | GPM2 | 4B | AX.89726318 | 5.34E+08 | 0.23 | -779.68 | 3.73 | 0.06 |
| E1 | GPM2 | 4B | AX.89436792 | 2.23E+08 | 0.35 | -669.91 | 3.60 | 0.06 |
| E1 | GPM2 | 4B | AX.89512685 | 5.87E+08 | 0.25 | 704.39  | 3.32 | 0.06 |
| E1 | GPM2 | 4B | AX.89761656 | 5.33E+08 | 0.32 | 630.14  | 3.11 | 0.05 |
| E1 | GPM2 | 4B | AX.89610360 | 9.33E+07 | 0.44 | -665.91 | 3.80 | 0.06 |
| E1 | GPM2 | 4B | AX.89612979 | 5.34E+08 | 0.23 | -779.68 | 3.73 | 0.06 |
| E1 | GPM2 | 4B | AX.89316538 | 5.62E+08 | 0.27 | 801.15  | 4.27 | 0.08 |
| E1 | GY   | 4B | AX.89355602 | 6.58E+08 | 0.08 | -5.05   | 4.38 | 0.07 |
| E1 | GPM2 | 4B | AX.89598047 | 1.68E+08 | 0.39 | -796.56 | 5.03 | 0.08 |
| E1 | GY   | 4B | AX.89752270 | 5.31E+08 | 0.33 | 2.56    | 3.37 | 0.06 |
| E1 | GPM2 | 4B | AX.89688994 | 5.33E+08 | 0.32 | 630.14  | 3.11 | 0.05 |
| E1 | GPM2 | 4B | AX.89706650 | 5.61E+08 | 0.27 | 729.99  | 3.67 | 0.07 |
| E1 | GY   | 4B | AX.89752585 | 1.97E+08 | 0.28 | 2.73    | 3.52 | 0.06 |
| E1 | GPM2 | 4B | AX.89762659 | 5.93E+07 | 0.36 | 624.92  | 3.22 | 0.06 |
| E1 | GPM2 | 4B | AX.89473460 | 5.62E+08 | 0.32 | 631.70  | 3.12 | 0.05 |
| E1 | GPM2 | 4B | AX.89422596 | 3.75E+08 | 0.28 | 739.81  | 3.86 | 0.07 |
| E1 | GY   | 4B | AX.89647330 | 5.61E+08 | 0.26 | 2.82    | 3.55 | 0.06 |
| E1 | GPM2 | 4B | AX.89349390 | 5.88E+08 | 0.25 | 704.39  | 3.32 | 0.06 |
| E1 | GPM2 | 4B | AX.89449412 | 5.37E+08 | 0.34 | 649.05  | 3.35 | 0.06 |
| E1 | GPM2 | 4B | AX.89327870 | 5.62E+08 | 0.28 | 742.19  | 3.85 | 0.07 |
| E1 | GPM2 | 4B | AX.89502783 | 1.48E+08 | 0.39 | 623.21  | 3.29 | 0.05 |
| E1 | GPM2 | 4B | AX.89400160 | 5.92E+08 | 0.26 | 662.79  | 3.02 | 0.05 |
| E1 | GPM2 | 4B | AX.89456967 | 5.62E+08 | 0.28 | 742.19  | 3.85 | 0.07 |
| E1 | GPM2 | 4B | AX.89358319 | 5.34E+08 | 0.23 | -779.68 | 3.73 | 0.06 |
| E1 | GY   | 4B | AX.89642919 | 5.33E+08 | 0.32 | 2.53    | 3.26 | 0.06 |
| E1 | GPM2 | 4B | AX.89599985 | 5.62E+08 | 0.28 | 742.19  | 3.85 | 0.07 |
| E1 | GY   | 4B | AX.89771775 | 6.58E+08 | 0.09 | -4.37   | 3.56 | 0.06 |
| E1 | GPM2 | 4B | AX.89516995 | 2.86E+08 | 0.35 | -716.14 | 4.02 | 0.06 |
| E1 | GPM2 | 4B | AX.89373348 | 8.99E+07 | 0.47 | -621.30 | 3.40 | 0.06 |
| E1 | GY   | 4B | AX.89616929 | 5.71E+08 | 0.28 | 2.57    | 3.14 | 0.06 |
| E1 | GPM2 | 4B | AX.89493700 | 5.34E+08 | 0.23 | -779.68 | 3.73 | 0.06 |
| E1 | GPM2 | 4B | AX.89698141 | 1.51E+08 | 0.38 | -840.80 | 5.51 | 0.09 |
| E1 | GY   | 4B | AX.89534566 | 5.62E+08 | 0.28 | 2.64    | 3.31 | 0.06 |
| E1 | GPM2 | 4B | AX.89361217 | 5.33E+08 | 0.32 | 630.14  | 3.11 | 0.05 |
| E1 | GY   | 4B | AX.89569510 | 5.62E+08 | 0.27 | 2.94    | 3.87 | 0.07 |
| E1 | GY   | 4B | AX.89569510 | 5.62E+08 | 0.27 | 2.94    | 3.87 | 0.07 |
| E1 | GPM2 | 4B | AX.89412641 | 8.99E+07 | 0.41 | -592.31 | 3.07 | 0.05 |
| E1 | GPM2 | 4B | AX.86162512 | 5.32E+08 | 0.32 | 630.14  | 3.11 | 0.05 |
| E1 | GY   | 4B | AX.89476307 | 1.95E+08 | 0.27 | 2.62    | 3.22 | 0.06 |
| E1 | GY   | 4B | AX.89476307 | 1.95E+08 | 0.27 | 2.62    | 3.22 | 0.06 |
| E1 | GY   | 4B | AX.89586202 | 6.58E+08 | 0.09 | -4.37   | 3.56 | 0.06 |
| E1 | GY   | 4B | AX.89729866 | 6.58E+08 | 0.09 | -4.37   | 3.56 | 0.06 |
| E1 | SPM2 | 4B | AX.89575951 | 6.42E+08 | 0.32 | 18.92   | 3.47 | 0.06 |
| E1 | GY   | 4B | AX.89477195 | 5.32E+08 | 0.32 | 2.53    | 3.26 | 0.06 |

|    |      |    |             |          |      |          |      |      |
|----|------|----|-------------|----------|------|----------|------|------|
| E1 | GPM2 | 4B | AX.89637901 | 6.58E+08 | 0.08 | -1286.22 | 4.14 | 0.07 |
| E1 | GY   | 4B | AX.89683540 | 5.62E+08 | 0.26 | 2.75     | 3.39 | 0.06 |
| E1 | GPM2 | 4B | AX.89737295 | 5.34E+08 | 0.23 | -779.68  | 3.73 | 0.06 |
| E1 | GPM2 | 4B | AX.89465158 | 6.58E+08 | 0.09 | -1103.87 | 3.46 | 0.06 |
| E1 | GPM2 | 4B | AX.89604997 | 1.43E+08 | 0.39 | 623.21   | 3.29 | 0.05 |
| E1 | GPM2 | 4B | AX.89667145 | 1.68E+08 | 0.39 | -796.56  | 5.03 | 0.08 |
| E1 | GPM2 | 4B | AX.89708109 | 5.61E+08 | 0.26 | 740.31   | 3.69 | 0.07 |
| E1 | GPM2 | 4B | AX.89692741 | 5.31E+08 | 0.33 | 624.61   | 3.08 | 0.05 |
| E1 | GPM2 | 4B | AX.89681213 | 5.61E+08 | 0.27 | 729.99   | 3.67 | 0.07 |
| E1 | GY   | 4B | AX.89478754 | 5.31E+08 | 0.33 | 2.56     | 3.37 | 0.06 |
| E1 | GPM2 | 4B | AX.89414000 | 5.62E+08 | 0.27 | 836.33   | 4.65 | 0.09 |
| E1 | GPM2 | 4B | AX.89624445 | 5.33E+08 | 0.32 | 630.14   | 3.11 | 0.05 |
| E1 | GPM2 | 4B | AX.89476043 | 6.58E+08 | 0.09 | -1000.58 | 3.05 | 0.05 |
| E1 | GPM2 | 4B | AX.89633674 | 9.35E+07 | 0.43 | -649.05  | 3.62 | 0.06 |
| E1 | GY   | 4B | AX.89549282 | 5.33E+08 | 0.32 | 2.53     | 3.26 | 0.06 |
| E1 | GPM2 | 4B | AX.89667528 | 1.68E+08 | 0.39 | -796.56  | 5.03 | 0.08 |
| E1 | GPM2 | 4B | AX.89578164 | 5.33E+08 | 0.32 | 630.14   | 3.11 | 0.05 |
| E1 | GPS  | 4B | AX.89582795 | 6.43E+08 | 0.32 | -1.19    | 3.13 | 0.05 |
| E1 | GY   | 4B | AX.89483878 | 5.93E+08 | 0.21 | -2.92    | 3.30 | 0.05 |
| E1 | GPM2 | 4B | AX.89486798 | 5.62E+08 | 0.28 | 742.19   | 3.85 | 0.07 |
| E1 | GPM2 | 4B | AX.89571745 | 5.32E+08 | 0.32 | 630.14   | 3.11 | 0.05 |
| E1 | GPM2 | 4B | AX.89518901 | 1.41E+08 | 0.34 | 641.16   | 3.28 | 0.05 |
| E1 | GPM2 | 4B | AX.89628533 | 5.32E+08 | 0.32 | 630.14   | 3.11 | 0.05 |
| E1 | GPM2 | 4B | AX.89765585 | 9.29E+07 | 0.43 | -706.57  | 4.20 | 0.07 |
| E1 | GPM2 | 4B | AX.89354374 | 5.60E+08 | 0.26 | 826.66   | 4.47 | 0.08 |
| E1 | GPM2 | 4B | AX.89634563 | 2.05E+08 | 0.38 | -717.14  | 4.16 | 0.07 |
| E1 | GY   | 4B | AX.89446221 | 1.72E+08 | 0.39 | -2.38    | 3.17 | 0.04 |
| E1 | GPM2 | 4B | AX.89371502 | 5.37E+08 | 0.23 | 742.53   | 3.47 | 0.06 |
| E1 | GPM2 | 4B | AX.89512983 | 5.34E+08 | 0.32 | 630.14   | 3.11 | 0.05 |
| E1 | GPM2 | 4B | AX.89769229 | 5.31E+08 | 0.33 | 624.61   | 3.08 | 0.05 |
| E1 | GPS  | 4B | AX.89548012 | 6.43E+08 | 0.32 | -1.19    | 3.13 | 0.05 |
| E1 | GPM2 | 4B | AX.89697036 | 1.66E+08 | 0.38 | -751.74  | 4.50 | 0.07 |
| E1 | GY   | 4B | AX.89761656 | 5.33E+08 | 0.32 | 2.53     | 3.26 | 0.06 |
| E1 | GY   | 4B | AX.89761656 | 5.33E+08 | 0.32 | 2.53     | 3.26 | 0.06 |
| E1 | GY   | 4B | AX.89454237 | 5.62E+08 | 0.28 | 2.57     | 3.15 | 0.06 |
| E1 | GPM2 | 4B | AX.89380326 | 5.62E+08 | 0.25 | 785.31   | 4.00 | 0.07 |
| E1 | GPM2 | 4B | AX.89497508 | 5.32E+08 | 0.32 | 630.14   | 3.11 | 0.05 |
| E1 | GPM2 | 4B | AX.89356943 | 5.60E+08 | 0.27 | 754.72   | 3.85 | 0.07 |
| E1 | GPM2 | 4B | AX.89397095 | 5.33E+08 | 0.32 | 630.14   | 3.11 | 0.05 |
| E1 | GPM2 | 4B | AX.89623664 | 9.29E+07 | 0.43 | -706.57  | 4.20 | 0.07 |
| E1 | GPM2 | 4B | AX.89449444 | 5.62E+08 | 0.27 | 797.52   | 4.28 | 0.08 |
| E1 | GPS  | 4B | AX.89420848 | 6.43E+08 | 0.32 | -1.19    | 3.13 | 0.05 |
| E1 | GPM2 | 4B | AX.89674519 | 5.60E+08 | 0.27 | 729.99   | 3.67 | 0.07 |
| E1 | GPM2 | 4B | AX.89430244 | 5.31E+08 | 0.33 | 624.61   | 3.08 | 0.05 |
| E1 | GPM2 | 4B | AX.89649978 | 5.61E+08 | 0.27 | 729.99   | 3.67 | 0.07 |
| E1 | GPM2 | 4B | AX.89452772 | 5.62E+08 | 0.27 | 843.59   | 4.77 | 0.09 |
| E1 | GY   | 4B | AX.89660931 | 1.55E+08 | 0.38 | -2.33    | 3.02 | 0.04 |
| E1 | GPM2 | 4B | AX.89465925 | 8.99E+07 | 0.47 | -621.30  | 3.40 | 0.06 |
| E1 | GPM2 | 4B | AX.89360130 | 5.34E+08 | 0.23 | -779.68  | 3.73 | 0.06 |
| E1 | GPM2 | 4B | AX.89626539 | 5.31E+08 | 0.33 | 624.61   | 3.08 | 0.05 |

|    |      |    |             |          |      |          |      |      |
|----|------|----|-------------|----------|------|----------|------|------|
| E1 | GPM2 | 4B | AX.89352705 | 5.31E+08 | 0.33 | 624.61   | 3.08 | 0.05 |
| E1 | GY   | 4B | AX.89555995 | 5.93E+08 | 0.21 | -2.92    | 3.30 | 0.05 |
| E1 | GPS  | 4B | AX.89540061 | 6.43E+08 | 0.31 | -1.21    | 3.17 | 0.05 |
| E1 | GPM2 | 4B | AX.89578890 | 2.98E+08 | 0.34 | -664.15  | 3.49 | 0.05 |
| E1 | GY   | 4B | AX.89422024 | 5.33E+08 | 0.32 | 2.53     | 3.26 | 0.06 |
| E1 | GPM2 | 4B | AX.89775585 | 5.34E+08 | 0.23 | -779.68  | 3.73 | 0.06 |
| E1 | GPM2 | 4B | AX.89757114 | 5.31E+08 | 0.33 | 624.61   | 3.08 | 0.05 |
| E1 | GPM2 | 4B | AX.89604621 | 5.34E+08 | 0.23 | -779.68  | 3.73 | 0.06 |
| E1 | GY   | 4B | AX.89624995 | 6.13E+08 | 0.48 | -2.38    | 3.31 | 0.06 |
| E1 | GPM2 | 4B | AX.89669348 | 5.60E+08 | 0.26 | 826.66   | 4.47 | 0.08 |
| E1 | GPM2 | 4B | AX.89636790 | 6.58E+08 | 0.09 | -1103.87 | 3.46 | 0.06 |
| E1 | GPM2 | 4B | AX.89534566 | 5.62E+08 | 0.28 | 750.60   | 3.96 | 0.07 |
| E1 | GPM2 | 4B | AX.89378611 | 1.60E+08 | 0.39 | -796.56  | 5.03 | 0.08 |
| E1 | GPM2 | 4B | AX.89757410 | 5.62E+08 | 0.27 | 836.33   | 4.65 | 0.09 |
| E1 | GPS  | 4B | AX.86164394 | 6.43E+08 | 0.32 | -1.19    | 3.13 | 0.05 |
| E1 | GY   | 4B | AX.89622164 | 3.44E+08 | 0.28 | 2.73     | 3.52 | 0.06 |
| E1 | GPM2 | 4B | AX.89427218 | 1.44E+08 | 0.39 | 623.21   | 3.29 | 0.05 |
| E1 | GY   | 4B | AX.89692741 | 5.31E+08 | 0.33 | 2.56     | 3.37 | 0.06 |
| E1 | GY   | 4B | AX.89692741 | 5.31E+08 | 0.33 | 2.56     | 3.37 | 0.06 |
| E1 | GPM2 | 4B | AX.89583019 | 5.34E+08 | 0.23 | -779.68  | 3.73 | 0.06 |
| E1 | GPM2 | 4B | AX.89322090 | 5.34E+08 | 0.23 | -779.68  | 3.73 | 0.06 |
| E1 | GPS  | 4B | AX.89630537 | 6.43E+08 | 0.32 | -1.19    | 3.13 | 0.05 |
| E1 | GPM2 | 4B | AX.89580725 | 5.33E+08 | 0.32 | 630.14   | 3.11 | 0.05 |
| E1 | GPM2 | 4B | AX.89436365 | 5.32E+08 | 0.32 | 630.14   | 3.11 | 0.05 |
| E1 | GPM2 | 4B | AX.89748792 | 5.31E+08 | 0.33 | 624.61   | 3.08 | 0.05 |
| E1 | GPS  | 4B | AX.89517394 | 6.43E+08 | 0.32 | -1.19    | 3.13 | 0.05 |
| E1 | GY   | 4B | AX.89726177 | 5.33E+08 | 0.32 | 2.53     | 3.26 | 0.06 |
| E1 | GPM2 | 4B | AX.89718135 | 5.31E+08 | 0.33 | 624.61   | 3.08 | 0.05 |
| E1 | GY   | 4B | AX.89518901 | 1.41E+08 | 0.34 | 2.40     | 3.07 | 0.05 |
| E1 | GY   | 4B | AX.89616304 | 5.60E+08 | 0.26 | 2.82     | 3.55 | 0.06 |
| E1 | GPM2 | 4B | AX.89407311 | 5.62E+08 | 0.27 | 836.33   | 4.65 | 0.09 |
| E1 | GPM2 | 4B | AX.89430932 | 6.58E+08 | 0.09 | -1072.67 | 3.30 | 0.05 |
| E1 | GPM2 | 4B | AX.89608524 | 5.35E+08 | 0.28 | -677.27  | 3.31 | 0.06 |
| E1 | GY   | 4B | AX.89694641 | 5.32E+08 | 0.32 | 2.53     | 3.26 | 0.06 |
| E1 | GY   | 4B | AX.89694641 | 5.32E+08 | 0.32 | 2.53     | 3.26 | 0.06 |
| E1 | GPM2 | 4B | AX.89368975 | 5.34E+08 | 0.23 | -779.68  | 3.73 | 0.06 |
| E1 | GPM2 | 4B | AX.89566116 | 1.60E+08 | 0.38 | -825.48  | 5.31 | 0.09 |
| E1 | GPM2 | 4B | AX.89439700 | 5.31E+08 | 0.33 | 624.61   | 3.08 | 0.05 |
| E1 | GY   | 4B | AX.89430244 | 5.31E+08 | 0.33 | 2.56     | 3.37 | 0.06 |
| E1 | GY   | 4B | AX.89452772 | 5.62E+08 | 0.27 | 2.99     | 4.04 | 0.07 |
| E1 | GPM2 | 4B | AX.89604806 | 9.20E+07 | 0.44 | -684.50  | 3.98 | 0.07 |
| E1 | GPM2 | 4B | AX.89677849 | 1.40E+08 | 0.40 | -786.27  | 4.99 | 0.09 |
| E1 | GPM2 | 4B | AX.89667185 | 6.58E+08 | 0.08 | -1253.68 | 4.14 | 0.07 |
| E1 | GPM2 | 4B | AX.89410817 | 5.34E+08 | 0.23 | -779.68  | 3.73 | 0.06 |
| E1 | GPM2 | 4B | AX.89743825 | 5.32E+08 | 0.32 | 630.14   | 3.11 | 0.05 |
| E1 | GY   | 4B | AX.89657621 | 5.32E+08 | 0.32 | 2.53     | 3.26 | 0.06 |
| E1 | GPS  | 4B | AX.89355046 | 6.43E+08 | 0.32 | -1.19    | 3.13 | 0.05 |
| E1 | GPM2 | 4B | AX.89752585 | 1.97E+08 | 0.28 | 739.81   | 3.86 | 0.07 |
| E1 | GY   | 4B | AX.89566116 | 1.60E+08 | 0.38 | -2.33    | 3.02 | 0.04 |
| E1 | GPM2 | 4B | AX.89490930 | 5.34E+08 | 0.23 | -779.68  | 3.73 | 0.06 |

|    |      |    |             |          |      |          |      |      |
|----|------|----|-------------|----------|------|----------|------|------|
| E1 | GPM2 | 4B | AX.89634709 | 5.34E+08 | 0.23 | -779.68  | 3.73 | 0.06 |
| E1 | GPM2 | 4B | AX.89746405 | 5.42E+08 | 0.23 | 742.53   | 3.47 | 0.06 |
| E1 | GPM2 | 4B | AX.89678567 | 5.32E+08 | 0.32 | 630.14   | 3.11 | 0.05 |
| E1 | GPM2 | 4B | AX.89611300 | 1.67E+08 | 0.39 | -796.56  | 5.03 | 0.08 |
| E1 | GPM2 | 4B | AX.89776240 | 5.31E+08 | 0.33 | 624.61   | 3.08 | 0.05 |
| E1 | GY   | 4B | AX.89316572 | 1.33E+07 | 0.05 | -5.41    | 3.32 | 0.05 |
| E1 | GPM2 | 4B | AX.89708001 | 5.35E+08 | 0.28 | -677.27  | 3.31 | 0.06 |
| E1 | GPM2 | 4B | AX.89458124 | 5.34E+08 | 0.23 | -779.68  | 3.73 | 0.06 |
| E1 | GPM2 | 4B | AX.89595080 | 1.45E+08 | 0.39 | -768.35  | 4.74 | 0.08 |
| E1 | GPM2 | 4B | AX.89642919 | 5.33E+08 | 0.32 | 630.14   | 3.11 | 0.05 |
| E1 | GPM2 | 4B | AX.89626371 | 1.66E+08 | 0.39 | -796.56  | 5.03 | 0.08 |
| E1 | GY   | 4B | AX.89338729 | 5.33E+08 | 0.32 | 2.53     | 3.26 | 0.06 |
| E1 | GY   | 4B | AX.89736658 | 5.22E+08 | 0.24 | 2.96     | 3.65 | 0.07 |
| E1 | GPM2 | 4B | AX.89357532 | 1.40E+08 | 0.40 | -771.09  | 4.82 | 0.08 |
| E1 | GY   | 4B | AX.89734003 | 6.58E+08 | 0.09 | -4.37    | 3.56 | 0.06 |
| E1 | GY   | 4B | AX.89734003 | 6.58E+08 | 0.09 | -4.37    | 3.56 | 0.06 |
| E1 | GPM2 | 4B | AX.89637611 | 5.31E+08 | 0.33 | 624.61   | 3.08 | 0.05 |
| E1 | GPM2 | 4B | AX.89564249 | 5.33E+08 | 0.32 | 630.14   | 3.11 | 0.05 |
| E1 | GPM2 | 4B | AX.89462337 | 5.89E+07 | 0.37 | 602.01   | 3.04 | 0.05 |
| E1 | GPM2 | 4B | AX.89561827 | 5.32E+08 | 0.32 | 630.14   | 3.11 | 0.05 |
| E1 | GY   | 4B | AX.89641200 | 6.58E+08 | 0.12 | -3.58    | 3.12 | 0.06 |
| E1 | GPM2 | 4B | AX.89562245 | 5.33E+08 | 0.32 | 630.14   | 3.11 | 0.05 |
| E1 | GPM2 | 4B | AX.89694641 | 5.32E+08 | 0.32 | 630.14   | 3.11 | 0.05 |
| E1 | GPM2 | 4B | AX.89535038 | 5.58E+08 | 0.26 | 790.92   | 4.09 | 0.07 |
| E1 | GPM2 | 4B | AX.89519378 | 5.61E+08 | 0.27 | 688.02   | 3.28 | 0.06 |
| E1 | GY   | 4B | AX.89317811 | 5.31E+08 | 0.33 | 2.56     | 3.37 | 0.06 |
| E1 | GPM2 | 4B | AX.89338729 | 5.33E+08 | 0.32 | 630.14   | 3.11 | 0.05 |
| E1 | GPM2 | 4B | AX.89331903 | 6.58E+08 | 0.09 | -1103.87 | 3.46 | 0.06 |
| E1 | GPM2 | 4B | AX.89616304 | 5.60E+08 | 0.26 | 826.66   | 4.47 | 0.08 |
| E1 | GPM2 | 4B | AX.89390027 | 5.34E+08 | 0.23 | -779.68  | 3.73 | 0.06 |
| E1 | GPM2 | 4B | AX.89507152 | 5.30E+08 | 0.16 | -817.26  | 3.18 | 0.06 |
| E1 | GPM2 | 4B | AX.89347833 | 5.62E+08 | 0.28 | 742.19   | 3.85 | 0.07 |
| E1 | GPM2 | 4B | AX.89638092 | 3.79E+08 | 0.34 | -700.55  | 3.85 | 0.06 |
| E1 | GPM2 | 4B | AX.89759725 | 5.33E+08 | 0.32 | 630.14   | 3.11 | 0.05 |
| E1 | GY   | 4B | AX.89768552 | 5.31E+08 | 0.33 | 2.56     | 3.37 | 0.06 |
| E1 | GY   | 4B | AX.89768552 | 5.31E+08 | 0.33 | 2.56     | 3.37 | 0.06 |
| E1 | GPM2 | 4B | AX.89578373 | 1.40E+08 | 0.41 | -744.98  | 4.56 | 0.07 |
| E1 | GY   | 4B | AX.89436365 | 5.32E+08 | 0.32 | 2.53     | 3.26 | 0.06 |
| E1 | GPM2 | 4B | AX.89764432 | 5.33E+08 | 0.32 | 630.14   | 3.11 | 0.05 |
| E1 | GPM2 | 4B | AX.89381343 | 5.60E+08 | 0.27 | 836.33   | 4.65 | 0.09 |
| E1 | GPM2 | 4B | AX.89586202 | 6.58E+08 | 0.09 | -1103.87 | 3.46 | 0.06 |
| E1 | GY   | 4B | AX.89706082 | 5.33E+08 | 0.32 | 2.53     | 3.26 | 0.06 |
| E1 | GY   | 4B | AX.89759725 | 5.33E+08 | 0.32 | 2.53     | 3.26 | 0.06 |
| E1 | GPM2 | 4B | AX.89389357 | 6.58E+08 | 0.08 | -1253.68 | 4.14 | 0.07 |
| E1 | GY   | 4B | AX.89681781 | 5.31E+08 | 0.33 | 2.56     | 3.37 | 0.06 |
| E1 | GPM2 | 4B | AX.89319673 | 5.32E+08 | 0.32 | 630.14   | 3.11 | 0.05 |
| E1 | GPM2 | 4B | AX.89489081 | 5.35E+08 | 0.23 | -779.68  | 3.73 | 0.06 |
| E1 | GPM2 | 4B | AX.89476307 | 1.95E+08 | 0.27 | 649.01   | 3.03 | 0.05 |
| E1 | GY   | 4B | AX.89553918 | 1.68E+08 | 0.39 | -2.38    | 3.17 | 0.04 |
| E1 | GPM2 | 4B | AX.89404249 | 5.32E+08 | 0.32 | 630.14   | 3.11 | 0.05 |

|    |      |    |             |          |      |          |      |      |
|----|------|----|-------------|----------|------|----------|------|------|
| E1 | GPM2 | 4B | AX.89354461 | 5.33E+08 | 0.32 | 630.14   | 3.11 | 0.05 |
| E1 | GPM2 | 4B | AX.89672975 | 5.60E+08 | 0.26 | 826.66   | 4.47 | 0.08 |
| E1 | GPM2 | 4B | AX.89565967 | 5.62E+08 | 0.27 | 836.33   | 4.65 | 0.09 |
| E1 | GPM2 | 4B | AX.89757603 | 5.35E+08 | 0.28 | -677.27  | 3.31 | 0.06 |
| E1 | GPM2 | 4B | AX.89433900 | 5.33E+08 | 0.32 | 630.14   | 3.11 | 0.05 |
| E1 | GY   | 4B | AX.89680445 | 5.32E+08 | 0.32 | 2.53     | 3.26 | 0.06 |
| E1 | GY   | 4B | AX.89748792 | 5.31E+08 | 0.33 | 2.56     | 3.37 | 0.06 |
| E1 | GY   | 4B | AX.89518901 | 1.41E+08 | 0.34 | 2.40     | 3.07 | 0.05 |
| E1 | GPM2 | 4B | AX.89446221 | 1.72E+08 | 0.39 | -796.56  | 5.03 | 0.08 |
| E1 | GY   | 4B | AX.89535038 | 5.58E+08 | 0.26 | 2.89     | 3.66 | 0.07 |
| E1 | GY   | 4B | AX.89465158 | 6.58E+08 | 0.09 | -4.37    | 3.56 | 0.06 |
| E1 | GY   | 4B | AX.89497508 | 5.32E+08 | 0.32 | 2.53     | 3.26 | 0.06 |
| E1 | GY   | 4B | AX.89562245 | 5.33E+08 | 0.32 | 2.53     | 3.26 | 0.06 |
| E1 | GY   | 4B | AX.89718135 | 5.31E+08 | 0.33 | 2.56     | 3.37 | 0.06 |
| E1 | GY   | 4B | AX.89763483 | 6.58E+08 | 0.08 | -5.05    | 4.38 | 0.07 |
| E1 | GPM2 | 4B | AX.89381638 | 5.34E+08 | 0.23 | -779.68  | 3.73 | 0.06 |
| E1 | GPM2 | 4B | AX.89482598 | 5.34E+08 | 0.23 | -779.68  | 3.73 | 0.06 |
| E1 | GPM2 | 4B | AX.89487605 | 5.62E+08 | 0.32 | 928.97   | 6.10 | 0.12 |
| E1 | GPM2 | 4B | AX.89475860 | 5.32E+08 | 0.32 | 630.14   | 3.11 | 0.05 |
| E1 | GPM2 | 4B | AX.89641200 | 6.58E+08 | 0.12 | -910.15  | 3.07 | 0.05 |
| E1 | GPM2 | 4B | AX.89519558 | 5.34E+08 | 0.22 | -841.11  | 4.20 | 0.07 |
| E1 | GPM2 | 4B | AX.89763140 | 5.34E+08 | 0.23 | -779.68  | 3.73 | 0.06 |
| E1 | GPM2 | 4B | AX.89478754 | 5.31E+08 | 0.33 | 624.61   | 3.08 | 0.05 |
| E1 | GPM2 | 4B | AX.89594770 | 5.95E+07 | 0.36 | 624.92   | 3.22 | 0.06 |
| E1 | GPM2 | 4B | AX.89681781 | 5.31E+08 | 0.33 | 624.61   | 3.08 | 0.05 |
| E1 | GPM2 | 4B | AX.89364224 | 6.58E+08 | 0.09 | -1103.87 | 3.46 | 0.06 |
| E1 | GPM2 | 4B | AX.89548773 | 5.61E+08 | 0.27 | 729.99   | 3.67 | 0.07 |
| E1 | GPM2 | 4B | AX.89462202 | 5.61E+08 | 0.28 | 742.19   | 3.85 | 0.07 |
| E1 | GPM2 | 4B | AX.89384733 | 9.48E+07 | 0.43 | -649.05  | 3.62 | 0.06 |
| E1 | GY   | 4B | AX.89752585 | 1.97E+08 | 0.28 | 2.73     | 3.52 | 0.06 |
| E1 | GY   | 4B | AX.89473827 | 4.28E+08 | 0.45 | 2.31     | 3.11 | 0.05 |
| E1 | GY   | 4B | AX.89473827 | 4.28E+08 | 0.45 | 2.31     | 3.11 | 0.05 |
| E1 | GPM2 | 4B | AX.89436755 | 1.98E+06 | 0.25 | 694.04   | 3.23 | 0.06 |
| E1 | GPM2 | 4B | AX.89355602 | 6.58E+08 | 0.08 | -1253.68 | 4.14 | 0.07 |
| E1 | GPM2 | 4B | AX.89415532 | 5.32E+08 | 0.32 | 630.14   | 3.11 | 0.05 |
| E1 | GPM2 | 4B | AX.89457648 | 5.61E+08 | 0.27 | 729.99   | 3.67 | 0.07 |
| E1 | GPM2 | 4B | AX.89349594 | 5.61E+08 | 0.27 | 729.99   | 3.67 | 0.07 |
| E1 | GPM2 | 4B | AX.89514930 | 5.33E+08 | 0.32 | 630.14   | 3.11 | 0.05 |
| E1 | GPM2 | 4B | AX.89706082 | 5.33E+08 | 0.32 | 630.14   | 3.11 | 0.05 |
| E1 | GY   | 4B | AX.89512210 | 6.57E+08 | 0.07 | -4.60    | 3.23 | 0.05 |
| E1 | GY   | 4B | AX.89475860 | 5.32E+08 | 0.32 | 2.53     | 3.26 | 0.06 |
| E1 | GY   | 4B | AX.89561827 | 5.32E+08 | 0.32 | 2.53     | 3.26 | 0.06 |
| E1 | GPM2 | 4B | AX.89769498 | 1.59E+08 | 0.39 | 623.21   | 3.29 | 0.05 |
| E1 | GPM2 | 4B | AX.89533727 | 5.33E+08 | 0.32 | 630.14   | 3.11 | 0.05 |
| E1 | GPM2 | 4B | AX.89661370 | 5.62E+08 | 0.27 | 803.14   | 4.33 | 0.08 |
| E1 | GPM2 | 4B | AX.89644343 | 5.34E+08 | 0.23 | -779.68  | 3.73 | 0.06 |
| E1 | GPM2 | 4B | AX.89409367 | 5.34E+08 | 0.23 | -740.69  | 3.46 | 0.06 |
| E1 | GY   | 4B | AX.89439700 | 5.31E+08 | 0.33 | 2.56     | 3.37 | 0.06 |
| E1 | GPM2 | 4B | AX.89711784 | 6.58E+08 | 0.09 | -1103.87 | 3.46 | 0.06 |
| E1 | GPM2 | 4B | AX.89681180 | 5.31E+08 | 0.33 | 624.61   | 3.08 | 0.05 |

|    |      |    |             |          |      |          |      |      |
|----|------|----|-------------|----------|------|----------|------|------|
| E1 | GPM2 | 4B | AX.89746602 | 5.65E+08 | 0.29 | 752.47   | 4.01 | 0.07 |
| E1 | GPM2 | 4B | AX.89706716 | 5.34E+08 | 0.23 | -779.68  | 3.73 | 0.06 |
| E1 | GPM2 | 4B | AX.89569510 | 5.62E+08 | 0.27 | 836.33   | 4.65 | 0.09 |
| E1 | GPM2 | 4B | AX.89477195 | 5.32E+08 | 0.32 | 630.14   | 3.11 | 0.05 |
| E1 | GPM2 | 4B | AX.89344896 | 1.62E+08 | 0.38 | -840.80  | 5.51 | 0.09 |
| E1 | GY   | 4B | AX.89580725 | 5.33E+08 | 0.32 | 2.53     | 3.26 | 0.06 |
| E1 | GPM2 | 4B | AX.89376848 | 2.15E+08 | 0.28 | 739.81   | 3.86 | 0.07 |
| E1 | GPM2 | 4B | AX.89364679 | 5.35E+08 | 0.23 | -779.68  | 3.73 | 0.06 |
| E1 | GPM2 | 4B | AX.89718911 | 6.58E+08 | 0.09 | -1103.87 | 3.46 | 0.06 |
| E1 | GPM2 | 4B | AX.89604960 | 5.31E+08 | 0.33 | 624.61   | 3.08 | 0.05 |
| E1 | GPM2 | 4B | AX.89767527 | 5.34E+08 | 0.23 | -779.68  | 3.73 | 0.06 |
| E1 | GY   | 4B | AX.89637611 | 5.31E+08 | 0.33 | 2.56     | 3.37 | 0.06 |
| E1 | GY   | 4B | AX.89446221 | 1.72E+08 | 0.39 | -2.38    | 3.17 | 0.04 |
| E1 | GPM2 | 4B | AX.89565835 | 5.34E+08 | 0.23 | -779.68  | 3.73 | 0.06 |
| E1 | GPM2 | 4B | AX.89606985 | 5.25E+08 | 0.16 | -834.73  | 3.37 | 0.07 |
| E1 | GPM2 | 4B | AX.89760506 | 5.32E+08 | 0.32 | 630.14   | 3.11 | 0.05 |
| E1 | GPM2 | 4B | AX.89637662 | 9.30E+07 | 0.42 | -623.21  | 3.35 | 0.06 |
| E1 | GPM2 | 4B | AX.89736658 | 5.22E+08 | 0.24 | 694.11   | 3.13 | 0.05 |
| E1 | GPM2 | 4B | AX.89529379 | 5.33E+08 | 0.32 | 630.14   | 3.11 | 0.05 |
| E1 | GPM2 | 4B | AX.89497398 | 5.32E+08 | 0.32 | 630.14   | 3.11 | 0.05 |
| E1 | GPM2 | 4B | AX.89713958 | 5.34E+08 | 0.24 | -732.33  | 3.47 | 0.06 |
| E1 | GPM2 | 4B | AX.89438370 | 5.34E+08 | 0.23 | -779.68  | 3.73 | 0.06 |
| E1 | GPM2 | 4B | AX.89705801 | 6.58E+08 | 0.09 | -1103.87 | 3.46 | 0.06 |
| E1 | GPM2 | 4B | AX.89639885 | 1.60E+08 | 0.39 | -738.80  | 4.40 | 0.07 |
| E1 | GPM2 | 4B | AX.89746587 | 1.40E+08 | 0.41 | -728.72  | 4.37 | 0.07 |
| E1 | GPM2 | 4B | AX.89496758 | 1.65E+08 | 0.39 | -796.56  | 5.03 | 0.08 |
| E1 | GPM2 | 4B | AX.89657621 | 5.32E+08 | 0.32 | 630.14   | 3.11 | 0.05 |
| E1 | GPM2 | 4B | AX.89723602 | 5.31E+08 | 0.33 | 624.61   | 3.08 | 0.05 |
| E1 | GPM2 | 4B | AX.89323722 | 5.60E+08 | 0.26 | 826.66   | 4.47 | 0.08 |
| E1 | GY   | 4B | AX.89648611 | 6.57E+08 | 0.07 | -4.60    | 3.23 | 0.05 |
| E1 | GPM2 | 4B | AX.89531900 | 5.62E+08 | 0.27 | 836.33   | 4.65 | 0.09 |
| E1 | GPM2 | 4B | AX.89344317 | 5.34E+08 | 0.23 | -779.68  | 3.73 | 0.06 |
| E1 | GPM2 | 4B | AX.89586718 | 5.35E+08 | 0.23 | -779.68  | 3.73 | 0.06 |
| E1 | GPM2 | 4B | AX.89494121 | 5.33E+08 | 0.32 | 630.14   | 3.11 | 0.05 |
| E1 | GPM2 | 4B | AX.89643271 | 5.33E+08 | 0.32 | 630.14   | 3.11 | 0.05 |
| E1 | GPM2 | 4B | AX.89450047 | 6.58E+08 | 0.09 | -1103.87 | 3.46 | 0.06 |
| E1 | GPM2 | 4B | AX.89662922 | 1.40E+08 | 0.40 | -771.09  | 4.82 | 0.08 |
| E1 | GPM2 | 4B | AX.89503045 | 5.34E+08 | 0.23 | -779.68  | 3.73 | 0.06 |
| E1 | GPM2 | 4B | AX.89719542 | 6.58E+08 | 0.08 | -1253.68 | 4.14 | 0.07 |
| E1 | GPM2 | 4B | AX.89331387 | 5.60E+08 | 0.27 | 729.99   | 3.67 | 0.07 |
| E1 | GPM2 | 4B | AX.89317768 | 5.34E+08 | 0.23 | -779.68  | 3.73 | 0.06 |
| E1 | GPM2 | 4B | AX.89678724 | 6.58E+08 | 0.09 | -1103.87 | 3.46 | 0.06 |
| E1 | GPM2 | 4B | AX.89559622 | 5.34E+08 | 0.23 | -779.68  | 3.73 | 0.06 |
| E1 | GPM2 | 4B | AX.89647330 | 5.61E+08 | 0.26 | 826.66   | 4.47 | 0.08 |
| E1 | GPM2 | 4B | AX.89738577 | 5.34E+08 | 0.22 | -841.11  | 4.20 | 0.07 |
| E1 | GPM2 | 4B | AX.89683540 | 5.62E+08 | 0.26 | 836.64   | 4.57 | 0.08 |
| E1 | GPM2 | 4B | AX.89656772 | 5.34E+08 | 0.23 | -779.68  | 3.73 | 0.06 |
| E1 | GPM2 | 4B | AX.89754106 | 5.32E+08 | 0.32 | 630.14   | 3.11 | 0.05 |
| E1 | GPM2 | 4B | AX.89336970 | 5.32E+08 | 0.32 | 630.14   | 3.11 | 0.05 |
| E1 | GPM2 | 4B | AX.89771775 | 6.58E+08 | 0.09 | -1103.87 | 3.46 | 0.06 |



|    |      |    |             |          |      |          |      |      |
|----|------|----|-------------|----------|------|----------|------|------|
| E1 | GY   | 4B | AX.89726177 | 5.33E+08 | 0.32 | 2.53     | 3.26 | 0.06 |
| E1 | GPM2 | 4B | AX.89673916 | 5.32E+08 | 0.32 | 630.14   | 3.11 | 0.05 |
| E1 | GPM2 | 4B | AX.89445465 | 1.40E+08 | 0.40 | -771.09  | 4.82 | 0.08 |
| E1 | GPM2 | 4B | AX.89553918 | 1.68E+08 | 0.39 | -796.56  | 5.03 | 0.08 |
| E1 | GPM2 | 4B | AX.89508190 | 5.61E+08 | 0.26 | 782.79   | 4.02 | 0.07 |
| E1 | GPM2 | 4B | AX.89508272 | 5.62E+08 | 0.28 | 742.19   | 3.85 | 0.07 |
| E1 | GPM2 | 4B | AX.89422294 | 5.34E+08 | 0.23 | -779.68  | 3.73 | 0.06 |
| E1 | GPM2 | 4B | AX.89650641 | 5.61E+08 | 0.27 | 729.99   | 3.67 | 0.07 |
| E1 | GPM2 | 4B | AX.89748798 | 5.62E+08 | 0.27 | 836.33   | 4.65 | 0.09 |
| E1 | GPM2 | 4B | AX.89401081 | 5.31E+08 | 0.33 | 624.61   | 3.08 | 0.05 |
| E1 | TKW  | 4B | AX.89624776 | 8.26E+05 | 0.20 | 1.30     | 4.52 | 0.08 |
| E1 | GPM2 | 4B | AX.89377927 | 5.32E+08 | 0.32 | 630.14   | 3.11 | 0.05 |
| E1 | GPM2 | 4B | AX.89354183 | 9.20E+07 | 0.43 | -706.57  | 4.20 | 0.07 |
| E1 | GPM2 | 4B | AX.89729866 | 6.58E+08 | 0.09 | -1103.87 | 3.46 | 0.06 |
| E1 | GPM2 | 4B | AX.89642522 | 5.32E+08 | 0.32 | 630.14   | 3.11 | 0.05 |
| E1 | GPM2 | 4B | AX.89426215 | 8.99E+07 | 0.41 | -592.31  | 3.07 | 0.05 |
| E1 | GPM2 | 4B | AX.89622164 | 3.44E+08 | 0.28 | 739.81   | 3.86 | 0.07 |
| E1 | GPM2 | 4B | AX.89372260 | 5.33E+08 | 0.32 | 630.14   | 3.11 | 0.05 |
| E1 | GPM2 | 4B | AX.89655632 | 1.60E+08 | 0.44 | -748.67  | 4.66 | 0.07 |
| E1 | GPM2 | 4B | AX.89419922 | 5.32E+08 | 0.32 | 630.14   | 3.11 | 0.05 |
| E1 | GY   | 4B | AX.89562245 | 5.33E+08 | 0.32 | 2.53     | 3.26 | 0.06 |
| E1 | GPM2 | 4B | AX.89595313 | 5.34E+08 | 0.23 | -779.68  | 3.73 | 0.06 |
| E1 | GPM2 | 4B | AX.89730387 | 1.72E+08 | 0.39 | -796.56  | 5.03 | 0.08 |
| E1 | GPM2 | 4B | AX.89640443 | 5.34E+08 | 0.23 | -779.68  | 3.73 | 0.06 |
| E1 | GPM2 | 4B | AX.89366415 | 5.34E+08 | 0.23 | -779.68  | 3.73 | 0.06 |
| E1 | GPM2 | 4B | AX.89467293 | 9.37E+07 | 0.43 | -649.05  | 3.62 | 0.06 |
| E1 | GPM2 | 4B | AX.89752270 | 5.31E+08 | 0.33 | 624.61   | 3.08 | 0.05 |
| E1 | GPM2 | 4B | AX.89467518 | 2.19E+08 | 0.40 | -655.47  | 3.63 | 0.06 |
| E1 | GPM2 | 4B | AX.89609574 | 5.61E+08 | 0.27 | 729.99   | 3.67 | 0.07 |
| E1 | GPM2 | 4B | AX.89682209 | 5.33E+08 | 0.32 | 630.14   | 3.11 | 0.05 |
| E1 | GPM2 | 4B | AX.89654105 | 5.35E+08 | 0.23 | -779.68  | 3.73 | 0.06 |
| E1 | GPM2 | 4B | AX.89441425 | 5.34E+08 | 0.23 | -779.68  | 3.73 | 0.06 |
| E1 | GPM2 | 4B | AX.89673378 | 5.34E+08 | 0.23 | -779.68  | 3.73 | 0.06 |
| E1 | GY   | 4B | AX.89736658 | 5.22E+08 | 0.24 | 2.96     | 3.65 | 0.07 |
| E1 | GPM2 | 4B | AX.89368909 | 5.34E+08 | 0.23 | -742.38  | 3.43 | 0.06 |
| E1 | GPM2 | 4B | AX.89497126 | 5.32E+08 | 0.32 | 630.14   | 3.11 | 0.05 |
| E1 | GPM2 | 4B | AX.89476160 | 1.72E+08 | 0.39 | -796.56  | 5.03 | 0.08 |
| E1 | TKW  | 4B | AX.89311841 | 1.09E+06 | 0.20 | 1.30     | 4.52 | 0.08 |
| E1 | GPM2 | 4B | AX.89361958 | 5.31E+08 | 0.33 | 624.61   | 3.08 | 0.05 |
| E1 | GPM2 | 4B | AX.89514433 | 5.34E+08 | 0.23 | -779.68  | 3.73 | 0.06 |
| E1 | GPM2 | 4B | AX.89433824 | 6.58E+08 | 0.08 | -1253.68 | 4.14 | 0.07 |
| E1 | GPM2 | 4B | AX.89557504 | 6.58E+08 | 0.08 | -1253.68 | 4.14 | 0.07 |
| E1 | GY   | 4B | AX.89636790 | 6.58E+08 | 0.09 | -4.37    | 3.56 | 0.06 |
| E1 | GPM2 | 4B | AX.89701032 | 6.58E+08 | 0.07 | -1259.99 | 3.80 | 0.06 |
| E1 | GPM2 | 4B | AX.89687239 | 9.26E+07 | 0.41 | -592.31  | 3.07 | 0.05 |
| E1 | GPM2 | 4B | AX.89763483 | 6.58E+08 | 0.08 | -1253.68 | 4.14 | 0.07 |
| E1 | GPM2 | 4B | AX.89723548 | 9.11E+07 | 0.42 | -677.82  | 3.89 | 0.07 |
| E1 | GPM2 | 4B | AX.89604119 | 5.34E+08 | 0.23 | -779.68  | 3.73 | 0.06 |
| E1 | TKW  | 4B | AX.89688587 | 1.06E+06 | 0.13 | 1.45     | 3.98 | 0.06 |
| E1 | GPM2 | 4B | AX.89472483 | 5.62E+08 | 0.27 | 838.10   | 4.72 | 0.09 |

|    |      |    |             |          |      |          |      |      |
|----|------|----|-------------|----------|------|----------|------|------|
| E1 | GPM2 | 4B | AX.89616929 | 5.71E+08 | 0.28 | 681.65   | 3.32 | 0.06 |
| E1 | GPM2 | 4B | AX.89557593 | 5.62E+08 | 0.28 | 742.19   | 3.85 | 0.07 |
| E1 | TKW  | 4B | AX.89316017 | 1.05E+06 | 0.16 | 1.19     | 3.25 | 0.05 |
| E1 | GPM2 | 4B | AX.89584687 | 5.63E+08 | 0.29 | 752.47   | 4.01 | 0.07 |
| E1 | GPM2 | 4B | AX.89768552 | 5.31E+08 | 0.33 | 624.61   | 3.08 | 0.05 |
| E1 | GPM2 | 4B | AX.89669977 | 1.65E+08 | 0.39 | -796.56  | 5.03 | 0.08 |
| E1 | GY   | 4B | AX.89711784 | 6.58E+08 | 0.09 | -4.37    | 3.56 | 0.06 |
| E1 | GY   | 4B | AX.89759725 | 5.33E+08 | 0.32 | 2.53     | 3.26 | 0.06 |
| E1 | GPM2 | 4B | AX.89388981 | 1.69E+08 | 0.39 | -793.07  | 4.99 | 0.08 |
| E1 | GPM2 | 4B | AX.89437061 | 5.34E+08 | 0.23 | -744.02  | 3.48 | 0.06 |
| E1 | GPM2 | 4B | AX.89422024 | 5.33E+08 | 0.32 | 630.14   | 3.11 | 0.05 |
| E1 | GPM2 | 4B | AX.89344798 | 5.33E+08 | 0.32 | 630.14   | 3.11 | 0.05 |
| E1 | GPM2 | 4B | AX.89677795 | 5.60E+08 | 0.27 | 729.99   | 3.67 | 0.07 |
| E1 | GPM2 | 4B | AX.89777674 | 5.35E+08 | 0.37 | 619.71   | 3.19 | 0.06 |
| E1 | GPM2 | 4B | AX.89757598 | 5.34E+08 | 0.23 | -707.24  | 3.19 | 0.05 |
| E1 | GPM2 | 4B | AX.89726177 | 5.33E+08 | 0.32 | 630.14   | 3.11 | 0.05 |
| E1 | GY   | 4B | AX.89493063 | 6.57E+08 | 0.07 | -4.60    | 3.23 | 0.05 |
| E1 | GPM2 | 4B | AX.89576163 | 5.31E+08 | 0.33 | 610.66   | 3.00 | 0.05 |
| E1 | GPM2 | 4B | AX.89680445 | 5.32E+08 | 0.32 | 630.14   | 3.11 | 0.05 |
| E1 | TKW  | 4B | AX.89516841 | 1.06E+06 | 0.13 | 1.45     | 3.98 | 0.06 |
| E1 | GY   | 4B | AX.89688994 | 5.33E+08 | 0.32 | 2.53     | 3.26 | 0.06 |
| E1 | TKW  | 4B | AX.89405164 | 1.05E+06 | 0.20 | 1.30     | 4.52 | 0.08 |
| E1 | TKW  | 4B | AX.89603801 | 8.23E+05 | 0.15 | 1.39     | 4.15 | 0.07 |
| E1 | TKW  | 4B | AX.89598155 | 1.09E+06 | 0.13 | 1.45     | 3.98 | 0.06 |
| E1 | GPM2 | 4B | AX.89653815 | 5.60E+08 | 0.26 | 803.67   | 4.25 | 0.08 |
| E1 | GPM2 | 4B | AX.89429904 | 5.34E+08 | 0.23 | -779.68  | 3.73 | 0.06 |
| E1 | GPM2 | 4B | AX.89529468 | 5.32E+08 | 0.32 | 630.14   | 3.11 | 0.05 |
| E1 | GPM2 | 4B | AX.89604722 | 5.34E+08 | 0.23 | -779.68  | 3.73 | 0.06 |
| E1 | GPM2 | 4B | AX.89317811 | 5.31E+08 | 0.33 | 624.61   | 3.08 | 0.05 |
| E1 | GPM2 | 4B | AX.89683137 | 6.58E+08 | 0.09 | -1103.87 | 3.46 | 0.06 |
| E1 | GPM2 | 4B | AX.89626357 | 5.33E+08 | 0.32 | 630.14   | 3.11 | 0.05 |
| E1 | GY   | 4B | AX.89723602 | 5.31E+08 | 0.33 | 2.56     | 3.37 | 0.06 |
| E1 | GPM2 | 4B | AX.89570782 | 5.32E+08 | 0.32 | 630.14   | 3.11 | 0.05 |
| E1 | GPM2 | 4B | AX.89422233 | 9.51E+07 | 0.43 | -649.05  | 3.62 | 0.06 |
| E1 | GPM2 | 4B | AX.89432437 | 5.60E+08 | 0.33 | 611.96   | 3.01 | 0.05 |
| E1 | GPM2 | 4B | AX.89502649 | 5.34E+08 | 0.23 | -779.68  | 3.73 | 0.06 |
| E1 | TKW  | 4B | AX.89700283 | 1.05E+06 | 0.15 | 1.39     | 4.15 | 0.07 |
| E1 | GY   | 4B | AX.89701032 | 6.58E+08 | 0.07 | -4.88    | 3.76 | 0.06 |
| E1 | GPM2 | 4B | AX.89454237 | 5.62E+08 | 0.28 | 742.19   | 3.85 | 0.07 |
| E1 | GPM2 | 4B | AX.89734223 | 9.35E+07 | 0.34 | -643.62  | 3.32 | 0.06 |
| E1 | GPM2 | 4B | AX.89660931 | 1.55E+08 | 0.38 | -825.48  | 5.31 | 0.09 |
| E1 | GPM2 | 4B | AX.89330007 | 6.58E+08 | 0.08 | -1121.40 | 3.41 | 0.05 |
| E1 | GPM2 | 4B | AX.89355730 | 5.32E+08 | 0.32 | 630.14   | 3.11 | 0.05 |
| E1 | GPM2 | 4B | AX.89753097 | 9.30E+07 | 0.44 | -665.91  | 3.80 | 0.06 |
| E1 | GPM2 | 4B | AX.89467069 | 5.33E+08 | 0.32 | 707.71   | 3.80 | 0.07 |
| E1 | GPM2 | 4B | AX.89731604 | 9.37E+07 | 0.43 | -649.05  | 3.62 | 0.06 |
| E1 | TKW  | 4B | AX.89470538 | 1.09E+06 | 0.18 | 1.32     | 4.27 | 0.07 |
| E1 | TKW  | 4B | AX.89472953 | 1.09E+06 | 0.13 | 1.45     | 3.98 | 0.06 |
| E1 | TKW  | 4B | AX.89326548 | 8.15E+05 | 0.11 | 1.44     | 3.41 | 0.05 |
| E1 | TKW  | 4B | AX.89376768 | 1.06E+06 | 0.13 | 1.45     | 3.98 | 0.06 |

|    |      |    |             |          |      |          |      |      |
|----|------|----|-------------|----------|------|----------|------|------|
| E1 | GPM2 | 4B | AX.89381203 | 5.34E+08 | 0.23 | -779.68  | 3.73 | 0.06 |
| E1 | GPM2 | 4B | AX.89734003 | 6.58E+08 | 0.09 | -1103.87 | 3.46 | 0.06 |
| E1 | TKW  | 4B | AX.89511155 | 1.05E+06 | 0.18 | 1.32     | 4.27 | 0.07 |
| E1 | TKW  | 4B | AX.89582667 | 1.06E+06 | 0.16 | 1.19     | 3.27 | 0.05 |
| E1 | GPM2 | 4B | AX.89725528 | 5.88E+08 | 0.25 | 704.39   | 3.32 | 0.06 |
| E1 | GPM2 | 4B | AX.89549282 | 5.33E+08 | 0.32 | 630.14   | 3.11 | 0.05 |
| E1 | GPM2 | 4B | AX.89772648 | 5.21E+08 | 0.23 | 716.42   | 3.27 | 0.06 |
| E1 | GPM2 | 4B | AX.89434819 | 5.62E+08 | 0.32 | 631.70   | 3.12 | 0.05 |
| E1 | TKW  | 4B | AX.89608391 | 1.05E+06 | 0.18 | 1.32     | 4.27 | 0.07 |
| E1 | TKW  | 4B | AX.89330961 | 1.05E+06 | 0.13 | 1.45     | 3.98 | 0.06 |
| E1 | TKW  | 4B | AX.89673766 | 1.08E+06 | 0.13 | 1.45     | 3.98 | 0.06 |
| E1 | TKW  | 4B | AX.89501151 | 1.08E+06 | 0.13 | 1.45     | 3.98 | 0.06 |
| E1 | TKW  | 4B | AX.89732228 | 1.06E+06 | 0.13 | 1.45     | 3.98 | 0.06 |
| E1 | TKW  | 4B | AX.89398014 | 1.12E+06 | 0.10 | 1.46     | 3.35 | 0.05 |
| E2 | GY   | 4B | AX.89574404 | 1.10E+06 | 0.05 | -4.27    | 3.01 | 0.04 |
| E2 | GY   | 4B | AX.89330007 | 6.58E+08 | 0.08 | -3.48    | 3.16 | 0.04 |
| E2 | SPM2 | 4B | AX.89618624 | 6.53E+08 | 0.08 | 24.35    | 3.92 | 0.07 |
| E2 | GY   | 4B | AX.89541555 | 1.31E+07 | 0.05 | -6.74    | 6.24 | 0.12 |
| E2 | GY   | 4B | AX.89552019 | 1.22E+07 | 0.07 | -3.78    | 3.19 | 0.04 |
| E2 | GY   | 4B | AX.89486157 | 6.39E+08 | 0.08 | -4.25    | 4.36 | 0.09 |
| E2 | GY   | 4B | AX.89486157 | 6.39E+08 | 0.08 | -4.25    | 4.36 | 0.09 |
| E2 | SPM2 | 4B | AX.89624995 | 6.13E+08 | 0.48 | -12.21   | 3.30 | 0.06 |
| E2 | GPM2 | 4B | AX.89338045 | 1.26E+06 | 0.31 | -562.81  | 3.46 | 0.05 |
| E2 | GPM2 | 4B | AX.89342325 | 1.25E+06 | 0.36 | -645.24  | 4.66 | 0.08 |
| E2 | SPM2 | 4B | AX.89398014 | 1.12E+06 | 0.10 | -20.07   | 3.28 | 0.05 |
| E2 | SPM2 | 4B | AX.89544391 | 6.43E+08 | 0.25 | 13.70    | 3.15 | 0.05 |
| E2 | GY   | 4B | AX.89594641 | 1.24E+07 | 0.07 | -3.90    | 3.18 | 0.04 |
| E2 | SPM2 | 4B | AX.89730025 | 6.43E+08 | 0.26 | 13.86    | 3.25 | 0.06 |
| E2 | SPM2 | 4B | AX.89441361 | 6.43E+08 | 0.29 | 13.36    | 3.28 | 0.06 |
| E2 | SPM2 | 4B | AX.89480256 | 6.37E+08 | 0.10 | 23.25    | 4.23 | 0.07 |
| E2 | GY   | 4B | AX.89602483 | 6.40E+08 | 0.17 | -2.90    | 3.85 | 0.07 |
| E2 | GPS  | 4B | AX.89648012 | 6.43E+08 | 0.29 | -1.63    | 3.72 | 0.05 |
| E2 | GPM2 | 4B | AX.89555854 | 1.11E+06 | 0.35 | -638.02  | 4.56 | 0.08 |
| E2 | GY   | 4B | AX.89550402 | 6.40E+08 | 0.17 | -2.90    | 3.85 | 0.07 |
| E2 | GY   | 4B | AX.89550402 | 6.40E+08 | 0.17 | -2.90    | 3.85 | 0.07 |
| E2 | GPS  | 4B | AX.89570204 | 6.43E+08 | 0.29 | -1.63    | 3.72 | 0.05 |
| E2 | GY   | 4B | AX.89400118 | 1.23E+07 | 0.07 | -3.90    | 3.18 | 0.04 |
| E2 | GY   | 4B | AX.89400118 | 1.23E+07 | 0.07 | -3.90    | 3.18 | 0.04 |
| E2 | GPM2 | 4B | AX.89470538 | 1.09E+06 | 0.18 | -763.15  | 4.20 | 0.08 |
| E2 | GPM2 | 4B | AX.89704777 | 1.32E+06 | 0.07 | -1085.62 | 3.58 | 0.06 |
| E2 | GPS  | 4B | AX.89417461 | 6.43E+08 | 0.29 | -1.63    | 3.72 | 0.05 |
| E2 | GPS  | 4B | AX.89743600 | 6.43E+08 | 0.29 | -1.63    | 3.72 | 0.05 |
| E2 | GPS  | 4B | AX.89730025 | 6.43E+08 | 0.25 | -1.52    | 3.07 | 0.04 |
| E2 | GY   | 4B | AX.89518627 | 1.26E+07 | 0.17 | -2.49    | 3.01 | 0.05 |
| E2 | GY   | 4B | AX.89518627 | 1.26E+07 | 0.17 | -2.49    | 3.01 | 0.05 |
| E2 | GY   | 4B | AX.89365524 | 6.41E+08 | 0.17 | -2.90    | 3.85 | 0.07 |
| E2 | GY   | 4B | AX.89365524 | 6.41E+08 | 0.17 | -2.90    | 3.85 | 0.07 |
| E2 | GPS  | 4B | AX.89411480 | 6.43E+08 | 0.30 | -1.63    | 3.76 | 0.06 |
| E2 | GPS  | 4B | AX.89607271 | 1.25E+07 | 0.06 | -2.77    | 3.08 | 0.06 |
| E2 | GY   | 4B | AX.89378503 | 1.23E+07 | 0.07 | -3.90    | 3.18 | 0.04 |

|    |      |    |             |          |      |          |      |      |
|----|------|----|-------------|----------|------|----------|------|------|
| E2 | GY   | 4B | AX.89378503 | 1.23E+07 | 0.07 | -3.90    | 3.18 | 0.04 |
| E2 | GPS  | 4B | AX.89447880 | 6.43E+08 | 0.29 | -1.63    | 3.72 | 0.05 |
| E2 | GPM2 | 4B | AX.89536017 | 1.10E+06 | 0.09 | -1000.28 | 4.18 | 0.07 |
| E2 | GPS  | 4B | AX.89700585 | 6.43E+08 | 0.29 | -1.63    | 3.72 | 0.05 |
| E2 | GY   | 4B | AX.89591455 | 1.10E+06 | 0.05 | -4.27    | 3.01 | 0.04 |
| E2 | GY   | 4B | AX.89591455 | 1.10E+06 | 0.05 | -4.27    | 3.01 | 0.04 |
| E2 | GPS  | 4B | AX.89592689 | 6.43E+08 | 0.29 | -1.63    | 3.72 | 0.05 |
| E2 | GY   | 4B | AX.89522924 | 1.23E+07 | 0.07 | -3.90    | 3.18 | 0.04 |
| E2 | GY   | 4B | AX.89522924 | 1.23E+07 | 0.07 | -3.90    | 3.18 | 0.04 |
| E2 | GPM2 | 4B | AX.89424041 | 1.26E+06 | 0.36 | -645.24  | 4.66 | 0.08 |
| E2 | GPM2 | 4B | AX.89556208 | 1.26E+07 | 0.05 | -1147.16 | 3.32 | 0.07 |
| E2 | GY   | 4B | AX.89384581 | 1.31E+07 | 0.07 | -5.60    | 6.33 | 0.13 |
| E2 | GY   | 4B | AX.89384581 | 1.31E+07 | 0.07 | -5.60    | 6.33 | 0.13 |
| E2 | GY   | 4B | AX.89316572 | 1.33E+07 | 0.05 | -4.25    | 3.01 | 0.04 |
| E2 | GY   | 4B | AX.89316572 | 1.33E+07 | 0.05 | -4.25    | 3.01 | 0.04 |
| E2 | GY   | 4B | AX.89717411 | 1.28E+07 | 0.07 | -5.24    | 5.59 | 0.11 |
| E2 | GY   | 4B | AX.89717411 | 1.28E+07 | 0.07 | -5.24    | 5.59 | 0.11 |
| E2 | GY   | 4B | AX.89503748 | 6.40E+08 | 0.17 | -2.90    | 3.85 | 0.07 |
| E2 | GY   | 4B | AX.89732714 | 1.23E+07 | 0.07 | -3.90    | 3.18 | 0.04 |
| E2 | GY   | 4B | AX.89732714 | 1.23E+07 | 0.07 | -3.90    | 3.18 | 0.04 |
| E2 | GPM2 | 4B | AX.89318677 | 1.27E+06 | 0.36 | -645.24  | 4.66 | 0.08 |
| E2 | GPM2 | 4B | AX.89393751 | 1.40E+07 | 0.12 | -746.66  | 3.01 | 0.04 |
| E2 | GY   | 4B | AX.89387392 | 1.22E+07 | 0.07 | -3.78    | 3.19 | 0.04 |
| E2 | GY   | 4B | AX.89387392 | 1.22E+07 | 0.07 | -3.78    | 3.19 | 0.04 |
| E2 | TKW  | 4B | AX.89508279 | 1.32E+06 | 0.36 | 0.99     | 3.36 | 0.06 |
| E2 | GY   | 4B | AX.89704777 | 1.32E+06 | 0.07 | -4.04    | 3.28 | 0.05 |
| E2 | GY   | 4B | AX.89704777 | 1.32E+06 | 0.07 | -4.04    | 3.28 | 0.05 |
| E2 | GPM2 | 4B | AX.89414530 | 1.25E+06 | 0.31 | -562.81  | 3.46 | 0.05 |
| E2 | TKW  | 4B | AX.89472953 | 1.09E+06 | 0.13 | 1.56     | 3.93 | 0.07 |
| E2 | GPM2 | 4B | AX.89751732 | 1.07E+06 | 0.35 | -655.75  | 4.75 | 0.08 |
| E2 | GY   | 4B | AX.89650100 | 1.31E+07 | 0.07 | -5.00    | 5.45 | 0.11 |
| E2 | GY   | 4B | AX.89650100 | 1.31E+07 | 0.07 | -5.00    | 5.45 | 0.11 |
| E2 | GY   | 4B | AX.89426986 | 6.58E+08 | 0.09 | -3.42    | 3.20 | 0.04 |
| E2 | GY   | 4B | AX.89426986 | 6.58E+08 | 0.09 | -3.42    | 3.20 | 0.04 |
| E2 | TKW  | 4B | AX.89516841 | 1.06E+06 | 0.13 | 1.56     | 3.93 | 0.07 |
| E2 | GPM2 | 4B | AX.89648033 | 1.27E+06 | 0.09 | -932.04  | 3.56 | 0.06 |
| E2 | GY   | 4B | AX.89563677 | 1.31E+07 | 0.07 | -3.96    | 3.62 | 0.07 |
| E2 | GY   | 4B | AX.89563677 | 1.31E+07 | 0.07 | -3.96    | 3.62 | 0.07 |
| E2 | GY   | 4B | AX.89604837 | 1.25E+07 | 0.07 | -3.90    | 3.18 | 0.04 |
| E2 | GY   | 4B | AX.89604837 | 1.25E+07 | 0.07 | -3.90    | 3.18 | 0.04 |
| E2 | TKW  | 4B | AX.89558314 | 5.59E+05 | 0.32 | 0.97     | 3.13 | 0.05 |
| E2 | GY   | 4B | AX.89607271 | 1.25E+07 | 0.06 | -6.07    | 6.49 | 0.13 |
| E2 | GY   | 4B | AX.89607271 | 1.25E+07 | 0.06 | -6.07    | 6.49 | 0.13 |
| E2 | GPM2 | 4B | AX.89442816 | 1.18E+06 | 0.31 | -562.81  | 3.46 | 0.05 |
| E2 | GPM2 | 4B | AX.89348247 | 1.27E+06 | 0.36 | -645.24  | 4.66 | 0.08 |
| E2 | TKW  | 4B | AX.89603812 | 1.06E+06 | 0.08 | 1.90     | 3.67 | 0.06 |
| E2 | GY   | 4B | AX.89492174 | 1.26E+07 | 0.05 | -6.55    | 5.90 | 0.12 |
| E2 | GY   | 4B | AX.89492174 | 1.26E+07 | 0.05 | -6.55    | 5.90 | 0.12 |
| E2 | GY   | 4B | AX.89503748 | 6.40E+08 | 0.17 | -2.90    | 3.85 | 0.07 |
| E2 | TKW  | 4B | AX.89470538 | 1.09E+06 | 0.18 | 1.41     | 4.22 | 0.08 |

|    |      |    |             |          |      |          |      |      |
|----|------|----|-------------|----------|------|----------|------|------|
| E2 | GY   | 4B | AX.89574404 | 1.10E+06 | 0.05 | -4.27    | 3.01 | 0.04 |
| E2 | GY   | 4B | AX.89330007 | 6.58E+08 | 0.08 | -3.48    | 3.16 | 0.04 |
| E2 | GPS  | 4B | AX.89702761 | 6.43E+08 | 0.29 | -1.63    | 3.72 | 0.05 |
| E2 | GY   | 4B | AX.89541555 | 1.31E+07 | 0.05 | -6.74    | 6.24 | 0.12 |
| E2 | GPM2 | 4B | AX.89525362 | 1.20E+06 | 0.10 | -908.75  | 3.68 | 0.06 |
| E2 | GY   | 4B | AX.89552019 | 1.22E+07 | 0.07 | -3.78    | 3.19 | 0.04 |
| E2 | GPM2 | 4B | AX.89511155 | 1.05E+06 | 0.18 | -763.15  | 4.20 | 0.08 |
| E2 | GPM2 | 4B | AX.89574404 | 1.10E+06 | 0.05 | -1169.16 | 3.39 | 0.05 |
| E2 | GPM2 | 4B | AX.89340924 | 1.22E+06 | 0.10 | -908.75  | 3.68 | 0.06 |
| E2 | TKW  | 4B | AX.89420815 | 5.61E+05 | 0.32 | 0.97     | 3.13 | 0.05 |
| E2 | GY   | 4B | AX.89590964 | 1.25E+06 | 0.12 | -3.26    | 3.58 | 0.05 |
| E2 | GY   | 4B | AX.89590964 | 1.25E+06 | 0.12 | -3.26    | 3.58 | 0.05 |
| E2 | GPM2 | 4B | AX.89736803 | 1.26E+06 | 0.31 | -562.81  | 3.46 | 0.05 |
| E2 | GPM2 | 4B | AX.89590964 | 1.25E+06 | 0.11 | -1035.84 | 5.10 | 0.09 |
| E2 | GY   | 4B | AX.89438962 | 1.31E+07 | 0.13 | -3.86    | 5.13 | 0.10 |
| E2 | GY   | 4B | AX.89438962 | 1.31E+07 | 0.13 | -3.86    | 5.13 | 0.10 |
| E2 | GPS  | 4B | AX.89407510 | 6.43E+08 | 0.30 | -1.49    | 3.24 | 0.05 |
| E2 | GY   | 4B | AX.89766498 | 1.23E+07 | 0.07 | -3.90    | 3.18 | 0.04 |
| E2 | GY   | 4B | AX.89766498 | 1.23E+07 | 0.07 | -3.90    | 3.18 | 0.04 |
| E2 | GPS  | 4B | AX.89489650 | 6.43E+08 | 0.29 | -1.63    | 3.72 | 0.05 |
| E2 | GPS  | 4B | AX.89373069 | 6.44E+08 | 0.32 | -1.48    | 3.31 | 0.05 |
| E2 | GPM2 | 4B | AX.89477576 | 1.12E+06 | 0.06 | -1254.49 | 4.10 | 0.07 |
| E2 | GPM2 | 4B | AX.89670164 | 1.26E+06 | 0.36 | -645.24  | 4.66 | 0.08 |
| E2 | GPM2 | 4B | AX.89607271 | 1.25E+07 | 0.06 | -1148.11 | 3.82 | 0.08 |
| E2 | GPM2 | 4B | AX.89710094 | 1.09E+06 | 0.35 | -627.33  | 4.40 | 0.07 |
| E2 | GPS  | 4B | AX.89624860 | 6.43E+08 | 0.29 | -1.63    | 3.72 | 0.05 |
| E2 | GPS  | 4B | AX.89353743 | 6.43E+08 | 0.32 | -1.40    | 3.02 | 0.04 |
| E2 | GY   | 4B | AX.89751657 | 6.41E+08 | 0.17 | -2.90    | 3.85 | 0.07 |
| E2 | GY   | 4B | AX.89751657 | 6.41E+08 | 0.17 | -2.90    | 3.85 | 0.07 |
| E2 | TKW  | 4B | AX.89598155 | 1.09E+06 | 0.13 | 1.56     | 3.93 | 0.07 |
| E2 | GY   | 4B | AX.89594641 | 1.24E+07 | 0.07 | -3.90    | 3.18 | 0.04 |
| E2 | GPM2 | 4B | AX.89354656 | 1.20E+06 | 0.10 | -908.75  | 3.68 | 0.06 |
| E2 | GPS  | 4B | AX.89312097 | 6.43E+08 | 0.30 | -1.49    | 3.24 | 0.05 |
| E2 | GPS  | 4B | AX.89477202 | 6.43E+08 | 0.30 | -1.49    | 3.24 | 0.05 |
| E2 | GPM2 | 4B | AX.89777442 | 1.06E+06 | 0.35 | -655.75  | 4.75 | 0.08 |
| E2 | TKW  | 4B | AX.89356251 | 6.73E+08 | 0.38 | -0.95    | 3.19 | 0.05 |
| E2 | GPM2 | 4B | AX.89482262 | 1.25E+06 | 0.31 | -562.81  | 3.46 | 0.05 |
| E2 | GPM2 | 4B | AX.89704154 | 1.06E+06 | 0.35 | -655.75  | 4.75 | 0.08 |
| E2 | GY   | 4B | AX.89372215 | 6.41E+08 | 0.17 | -2.90    | 3.85 | 0.07 |
| E2 | GY   | 4B | AX.89372215 | 6.41E+08 | 0.17 | -2.90    | 3.85 | 0.07 |
| E2 | GY   | 4B | AX.89477576 | 1.12E+06 | 0.06 | -4.30    | 3.26 | 0.05 |
| E2 | GY   | 4B | AX.89477576 | 1.12E+06 | 0.06 | -4.30    | 3.26 | 0.05 |
| E2 | GPS  | 4B | AX.89649782 | 6.43E+08 | 0.29 | -1.63    | 3.72 | 0.05 |
| E2 | GPS  | 4B | AX.89328165 | 6.43E+08 | 0.29 | -1.63    | 3.72 | 0.05 |
| E2 | GPS  | 4B | AX.89689786 | 6.43E+08 | 0.29 | -1.63    | 3.72 | 0.05 |
| E2 | GPM2 | 4B | AX.89311841 | 1.09E+06 | 0.20 | -770.05  | 4.68 | 0.09 |
| E2 | TKW  | 4B | AX.89545685 | 1.25E+06 | 0.36 | 0.99     | 3.36 | 0.06 |
| E2 | GPS  | 4B | AX.89420985 | 6.43E+08 | 0.29 | -1.63    | 3.72 | 0.05 |
| E2 | GPS  | 4B | AX.89577670 | 6.43E+08 | 0.28 | -1.63    | 3.64 | 0.05 |
| E2 | GY   | 4B | AX.89556208 | 1.26E+07 | 0.05 | -6.07    | 5.60 | 0.11 |

|    |      |    |             |          |      |          |      |      |
|----|------|----|-------------|----------|------|----------|------|------|
| E2 | TKW  | 4B | AX.89777442 | 1.06E+06 | 0.35 | 0.98     | 3.30 | 0.06 |
| E2 | GY   | 4B | AX.89602483 | 6.40E+08 | 0.17 | -2.90    | 3.85 | 0.07 |
| E2 | GPS  | 4B | AX.89607742 | 6.43E+08 | 0.29 | -1.63    | 3.72 | 0.05 |
| E2 | GPS  | 4B | AX.89735718 | 6.43E+08 | 0.30 | -1.64    | 3.80 | 0.06 |
| E2 | TKW  | 4B | AX.89311841 | 1.09E+06 | 0.20 | 1.37     | 4.34 | 0.08 |
| E2 | GPS  | 4B | AX.89379339 | 6.43E+08 | 0.33 | -1.40    | 3.02 | 0.04 |
| E2 | GPM2 | 4B | AX.89310301 | 2.38E+05 | 0.31 | -555.75  | 3.37 | 0.05 |
| E2 | GPM2 | 4B | AX.89558638 | 8.22E+05 | 0.35 | -655.75  | 4.75 | 0.08 |
| E2 | TKW  | 4B | AX.89501151 | 1.08E+06 | 0.13 | 1.56     | 3.93 | 0.07 |
| E2 | GPS  | 4B | AX.89481614 | 6.43E+08 | 0.29 | -1.63    | 3.72 | 0.05 |
| E2 | GPM2 | 4B | AX.89486157 | 6.39E+08 | 0.08 | -1000.04 | 3.78 | 0.09 |
| E2 | GPM2 | 4B | AX.89398310 | 1.31E+06 | 0.09 | -932.04  | 3.56 | 0.06 |
| E2 | GPM2 | 4B | AX.89510255 | 3.34E+06 | 0.06 | -1007.91 | 3.02 | 0.04 |
| E2 | GPM2 | 4B | AX.89541555 | 1.31E+07 | 0.05 | -1333.51 | 3.98 | 0.09 |
| E2 | GPS  | 4B | AX.89390122 | 6.43E+08 | 0.33 | -1.40    | 3.02 | 0.04 |
| E2 | GPS  | 4B | AX.89313935 | 6.43E+08 | 0.33 | -1.40    | 3.02 | 0.04 |
| E2 | GPS  | 4B | AX.89458144 | 6.43E+08 | 0.29 | -1.63    | 3.72 | 0.05 |
| E2 | GY   | 4B | AX.89514498 | 6.39E+08 | 0.08 | -4.25    | 4.36 | 0.09 |
| E2 | GY   | 4B | AX.89514498 | 6.39E+08 | 0.08 | -4.25    | 4.36 | 0.09 |
| E2 | GPS  | 4B | AX.89717455 | 6.43E+08 | 0.30 | -1.49    | 3.24 | 0.05 |
| E2 | GPM2 | 4B | AX.89624776 | 8.26E+05 | 0.20 | -770.05  | 4.68 | 0.09 |
| E2 | TKW  | 4B | AX.89385922 | 5.61E+05 | 0.32 | 0.97     | 3.13 | 0.05 |
| E2 | TKW  | 4B | AX.89704154 | 1.06E+06 | 0.35 | 0.98     | 3.30 | 0.06 |
| E2 | GPS  | 4B | AX.89405013 | 6.14E+08 | 0.39 | 1.40     | 3.22 | 0.05 |
| E2 | TKW  | 4B | AX.89376768 | 1.06E+06 | 0.13 | 1.56     | 3.93 | 0.07 |
| E2 | TKW  | 4B | AX.89550959 | 2.38E+05 | 0.35 | 1.00     | 3.39 | 0.06 |
| E2 | GPM2 | 4B | AX.89439714 | 1.26E+06 | 0.36 | -645.24  | 4.66 | 0.08 |
| E2 | TKW  | 4B | AX.89325823 | 1.32E+06 | 0.34 | 1.02     | 3.44 | 0.06 |
| E2 | GPS  | 4B | AX.89642726 | 6.60E+08 | 0.28 | 1.59     | 3.52 | 0.05 |
| E2 | GPM2 | 4B | AX.89316443 | 6.54E+08 | 0.07 | -985.39  | 3.08 | 0.05 |
| E2 | GPS  | 4B | AX.89729026 | 6.43E+08 | 0.29 | -1.63    | 3.72 | 0.05 |
| E2 | TKW  | 4B | AX.89732228 | 1.06E+06 | 0.13 | 1.56     | 3.93 | 0.07 |
| E2 | TKW  | 4B | AX.89700283 | 1.05E+06 | 0.15 | 1.46     | 3.96 | 0.07 |
| E2 | GPM2 | 4B | AX.89672636 | 1.20E+06 | 0.09 | -1000.28 | 4.18 | 0.07 |
| E2 | TKW  | 4B | AX.89405164 | 1.05E+06 | 0.20 | 1.37     | 4.34 | 0.08 |
| E2 | TKW  | 4B | AX.89342325 | 1.25E+06 | 0.36 | 0.99     | 3.36 | 0.06 |
| E2 | TKW  | 4B | AX.89424259 | 1.06E+06 | 0.35 | 0.98     | 3.30 | 0.06 |
| E2 | GPM2 | 4B | AX.89452063 | 1.25E+06 | 0.36 | -645.24  | 4.66 | 0.08 |
| E2 | GPS  | 4B | AX.89481722 | 6.43E+08 | 0.29 | -1.63    | 3.72 | 0.05 |
| E2 | TKW  | 4B | AX.89688587 | 1.06E+06 | 0.13 | 1.56     | 3.93 | 0.07 |
| E2 | TKW  | 4B | AX.89673766 | 1.08E+06 | 0.13 | 1.56     | 3.93 | 0.07 |
| E2 | GPM2 | 4B | AX.89678237 | 1.26E+06 | 0.31 | -562.81  | 3.46 | 0.05 |
| E2 | TKW  | 4B | AX.89651222 | 5.60E+05 | 0.32 | 0.97     | 3.13 | 0.05 |
| E2 | TKW  | 4B | AX.89603801 | 8.23E+05 | 0.15 | 1.46     | 3.96 | 0.07 |
| E2 | GY   | 4B | AX.89753877 | 1.26E+07 | 0.07 | -5.00    | 5.45 | 0.11 |
| E2 | GY   | 4B | AX.89753877 | 1.26E+07 | 0.07 | -5.00    | 5.45 | 0.11 |
| E2 | GY   | 4B | AX.89746323 | 6.51E+08 | 0.13 | -2.80    | 3.13 | 0.06 |
| E2 | GPM2 | 4B | AX.89679243 | 1.32E+06 | 0.34 | -588.12  | 3.85 | 0.06 |
| E2 | TKW  | 4B | AX.89760754 | 5.59E+05 | 0.32 | 0.97     | 3.13 | 0.05 |
| E2 | GPM2 | 4B | AX.89438962 | 1.31E+07 | 0.13 | -904.69  | 4.42 | 0.09 |

|    |      |    |             |          |      |          |      |      |
|----|------|----|-------------|----------|------|----------|------|------|
| E2 | TKW  | 4B | AX.89326548 | 8.15E+05 | 0.10 | 1.62     | 3.60 | 0.06 |
| E2 | TKW  | 4B | AX.89655662 | 1.08E+06 | 0.35 | 0.98     | 3.30 | 0.06 |
| E2 | TKW  | 4B | AX.89624776 | 8.26E+05 | 0.20 | 1.37     | 4.34 | 0.08 |
| E2 | TKW  | 4B | AX.89500369 | 1.20E+06 | 0.36 | 0.99     | 3.36 | 0.06 |
| E2 | GPS  | 4B | AX.89506257 | 6.43E+08 | 0.29 | -1.63    | 3.72 | 0.05 |
| E2 | TKW  | 4B | AX.89623298 | 5.62E+05 | 0.32 | 0.97     | 3.13 | 0.05 |
| E2 | GY   | 4B | AX.89356483 | 6.41E+08 | 0.17 | -2.90    | 3.85 | 0.07 |
| E2 | GY   | 4B | AX.89356483 | 6.41E+08 | 0.17 | -2.90    | 3.85 | 0.07 |
| E2 | GY   | 4B | AX.89555692 | 1.23E+07 | 0.07 | -3.90    | 3.18 | 0.04 |
| E2 | GY   | 4B | AX.89555692 | 1.23E+07 | 0.07 | -3.90    | 3.18 | 0.04 |
| E2 | TKW  | 4B | AX.89725766 | 6.73E+08 | 0.38 | -0.92    | 3.02 | 0.05 |
| E2 | GPM2 | 4B | AX.89655662 | 1.08E+06 | 0.35 | -655.75  | 4.75 | 0.08 |
| E2 | GPM2 | 4B | AX.89384581 | 1.31E+07 | 0.07 | -1031.27 | 3.56 | 0.07 |
| E2 | GPS  | 4B | AX.89600316 | 6.43E+08 | 0.30 | -1.49    | 3.24 | 0.05 |
| E2 | GPS  | 4B | AX.89542249 | 6.43E+08 | 0.29 | -1.63    | 3.72 | 0.05 |
| E2 | TKW  | 4B | AX.89577839 | 5.57E+05 | 0.32 | 0.97     | 3.13 | 0.05 |
| E2 | GPM2 | 4B | AX.89311787 | 1.27E+06 | 0.36 | -645.24  | 4.66 | 0.08 |
| E2 | GPM2 | 4B | AX.89405164 | 1.05E+06 | 0.20 | -770.05  | 4.68 | 0.09 |
| E2 | GPS  | 4B | AX.89407767 | 6.43E+08 | 0.29 | -1.63    | 3.72 | 0.05 |
| E2 | GY   | 4B | AX.89556208 | 1.26E+07 | 0.05 | -6.07    | 5.60 | 0.11 |
| E2 | GPM2 | 4B | AX.89698426 | 1.10E+06 | 0.09 | -1000.28 | 4.18 | 0.07 |
| E2 | GPS  | 4B | AX.89692924 | 6.43E+08 | 0.29 | -1.63    | 3.72 | 0.05 |
| E2 | GY   | 4B | AX.89530566 | 1.22E+07 | 0.07 | -3.78    | 3.19 | 0.04 |
| E2 | GY   | 4B | AX.89696663 | 6.51E+08 | 0.13 | -2.86    | 3.24 | 0.06 |
| E2 | TKW  | 4B | AX.89531200 | 5.61E+05 | 0.32 | 0.97     | 3.13 | 0.05 |
| E2 | GPS  | 4B | AX.89332326 | 6.43E+08 | 0.29 | -1.63    | 3.72 | 0.05 |
| E2 | TKW  | 4B | AX.89777133 | 1.13E+06 | 0.36 | 0.99     | 3.36 | 0.06 |
| E2 | GPS  | 4B | AX.89701639 | 6.43E+08 | 0.33 | -1.40    | 3.02 | 0.04 |
| E2 | TKW  | 4B | AX.89438749 | 5.55E+05 | 0.33 | 0.97     | 3.12 | 0.05 |
| E2 | GPM2 | 4B | AX.89507664 | 2.39E+05 | 0.31 | -555.75  | 3.37 | 0.05 |
| E2 | GY   | 4B | AX.89746323 | 6.51E+08 | 0.13 | -2.80    | 3.13 | 0.06 |
| E2 | GPM2 | 4B | AX.89340425 | 1.26E+06 | 0.36 | -645.24  | 4.66 | 0.08 |
| E2 | GPM2 | 4B | AX.89753398 | 1.32E+06 | 0.36 | -645.24  | 4.66 | 0.08 |
| E2 | GPM2 | 4B | AX.89481031 | 1.05E+06 | 0.35 | -655.75  | 4.75 | 0.08 |
| E2 | GY   | 4B | AX.89582539 | 1.26E+06 | 0.07 | -4.04    | 3.28 | 0.05 |
| E2 | GPM2 | 4B | AX.89584959 | 1.32E+06 | 0.36 | -645.24  | 4.66 | 0.08 |
| E2 | GPM2 | 4B | AX.89424259 | 1.06E+06 | 0.35 | -655.75  | 4.75 | 0.08 |
| E2 | GPS  | 4B | AX.89661499 | 6.43E+08 | 0.29 | -1.63    | 3.72 | 0.05 |
| E2 | GPM2 | 4B | AX.89777133 | 1.13E+06 | 0.36 | -645.24  | 4.66 | 0.08 |
| E2 | TKW  | 4B | AX.89485400 | 5.58E+05 | 0.32 | 0.97     | 3.13 | 0.05 |
| E2 | GPS  | 4B | AX.89700923 | 6.43E+08 | 0.29 | -1.63    | 3.72 | 0.05 |
| E2 | GPM2 | 4B | AX.89582539 | 1.26E+06 | 0.07 | -1085.62 | 3.58 | 0.06 |
| E2 | GPM2 | 4B | AX.89550959 | 2.38E+05 | 0.35 | -638.02  | 4.56 | 0.08 |
| E2 | TKW  | 4B | AX.89586227 | 1.32E+06 | 0.36 | 0.99     | 3.36 | 0.06 |
| E2 | GPM2 | 4B | AX.89357689 | 6.22E+08 | 0.11 | -787.21  | 3.09 | 0.05 |
| E2 | GY   | 4B | AX.89611914 | 6.47E+08 | 0.23 | -2.60    | 3.95 | 0.07 |
| E2 | GPS  | 4B | AX.89403094 | 6.43E+08 | 0.32 | -1.40    | 3.02 | 0.04 |
| E2 | GPS  | 4B | AX.89535815 | 6.43E+08 | 0.29 | -1.63    | 3.72 | 0.05 |
| E2 | GPM2 | 4B | AX.89508279 | 1.32E+06 | 0.36 | -645.24  | 4.66 | 0.08 |
| E2 | TKW  | 4B | AX.89532492 | 5.61E+05 | 0.32 | 0.97     | 3.13 | 0.05 |

|    |      |    |             |          |      |          |      |      |
|----|------|----|-------------|----------|------|----------|------|------|
| E2 | GPS  | 4B | AX.89441361 | 6.43E+08 | 0.29 | -1.49    | 3.18 | 0.05 |
| E2 | GPM2 | 4B | AX.89754574 | 1.12E+06 | 0.35 | -608.47  | 4.19 | 0.07 |
| E2 | GY   | 4B | AX.89582539 | 1.26E+06 | 0.07 | -4.04    | 3.28 | 0.05 |
| E2 | TKW  | 4B | AX.89753398 | 1.32E+06 | 0.36 | 0.99     | 3.36 | 0.06 |
| E2 | GPM2 | 4B | AX.89669729 | 1.20E+06 | 0.09 | -1000.28 | 4.18 | 0.07 |
| E2 | GY   | 4B | AX.89696663 | 6.51E+08 | 0.13 | -2.86    | 3.24 | 0.06 |
| E2 | TKW  | 4B | AX.89316017 | 1.05E+06 | 0.15 | 1.32     | 3.39 | 0.06 |
| E2 | GPM2 | 4B | AX.89678902 | 1.20E+06 | 0.31 | -562.81  | 3.46 | 0.05 |
| E2 | GPS  | 4B | AX.89520936 | 6.43E+08 | 0.29 | -1.63    | 3.72 | 0.05 |
| E2 | GPM2 | 4B | AX.89591455 | 1.10E+06 | 0.05 | -1169.16 | 3.39 | 0.05 |
| E2 | GPM2 | 4B | AX.89711166 | 1.13E+06 | 0.35 | -557.87  | 3.57 | 0.06 |
| E2 | TKW  | 4B | AX.89558638 | 8.22E+05 | 0.35 | 0.98     | 3.30 | 0.06 |
| E2 | GPS  | 4B | AX.89411200 | 6.43E+08 | 0.29 | -1.63    | 3.72 | 0.05 |
| E2 | GPS  | 4B | AX.89379401 | 6.43E+08 | 0.30 | -1.59    | 3.61 | 0.05 |
| E2 | GPM2 | 4B | AX.89317719 | 1.24E+06 | 0.09 | -1000.28 | 4.18 | 0.07 |
| E2 | GPS  | 4B | AX.89506443 | 6.43E+08 | 0.29 | -1.63    | 3.72 | 0.05 |
| E2 | GPS  | 4B | AX.89684241 | 6.43E+08 | 0.29 | -1.63    | 3.72 | 0.05 |
| E2 | TKW  | 4B | AX.89608391 | 1.05E+06 | 0.18 | 1.41     | 4.22 | 0.08 |
| E2 | GPM2 | 4B | AX.89433236 | 1.27E+06 | 0.36 | -645.24  | 4.66 | 0.08 |
| E2 | GPM2 | 4B | AX.89767218 | 1.26E+06 | 0.36 | -645.24  | 4.66 | 0.08 |
| E2 | GPM2 | 4B | AX.89500369 | 1.20E+06 | 0.36 | -645.24  | 4.66 | 0.08 |
| E2 | TKW  | 4B | AX.89330961 | 1.05E+06 | 0.13 | 1.56     | 3.93 | 0.07 |
| E2 | GPS  | 4B | AX.89644812 | 6.43E+08 | 0.30 | -1.49    | 3.24 | 0.05 |
| E2 | TKW  | 4B | AX.89715931 | 5.62E+05 | 0.32 | 0.97     | 3.13 | 0.05 |
| E2 | GPM2 | 4B | AX.89722528 | 1.10E+06 | 0.07 | -1101.78 | 3.91 | 0.07 |
| E2 | TKW  | 4B | AX.89481031 | 1.05E+06 | 0.35 | 0.98     | 3.30 | 0.06 |
| E2 | GPS  | 4B | AX.89720444 | 6.43E+08 | 0.29 | -1.63    | 3.72 | 0.05 |
| E2 | TKW  | 4B | AX.89767218 | 1.26E+06 | 0.36 | 0.99     | 3.36 | 0.06 |
| E2 | GPS  | 4B | AX.89530747 | 6.43E+08 | 0.29 | -1.63    | 3.72 | 0.05 |
| E2 | GPS  | 4B | AX.89386120 | 6.43E+08 | 0.29 | -1.63    | 3.72 | 0.05 |
| E2 | GPM2 | 4B | AX.89546587 | 1.10E+06 | 0.09 | -1000.28 | 4.18 | 0.07 |
| E2 | GPM2 | 4B | AX.89376620 | 1.13E+06 | 0.31 | -527.34  | 3.12 | 0.04 |
| E2 | GPM2 | 4B | AX.89711023 | 2.38E+05 | 0.31 | -555.75  | 3.37 | 0.05 |
| E2 | TKW  | 4B | AX.89511155 | 1.05E+06 | 0.18 | 1.41     | 4.22 | 0.08 |
| E2 | TKW  | 4B | AX.89751732 | 1.07E+06 | 0.35 | 0.98     | 3.30 | 0.06 |
| E2 | TKW  | 4B | AX.89584959 | 1.32E+06 | 0.36 | 0.99     | 3.36 | 0.06 |
| E2 | TKW  | 4B | AX.89679243 | 1.32E+06 | 0.34 | 1.02     | 3.44 | 0.06 |
| E2 | GPM2 | 4B | AX.89514498 | 6.39E+08 | 0.08 | -1000.04 | 3.78 | 0.09 |
| E2 | GPM2 | 4B | AX.89387141 | 1.21E+06 | 0.09 | -1000.28 | 4.18 | 0.07 |
| E2 | GPS  | 4B | AX.89594400 | 6.43E+08 | 0.29 | -1.63    | 3.72 | 0.05 |
| E2 | GPM2 | 4B | AX.89385325 | 1.22E+06 | 0.09 | -1000.28 | 4.18 | 0.07 |
| E2 | TKW  | 4B | AX.89452063 | 1.25E+06 | 0.36 | 0.99     | 3.36 | 0.06 |
| E2 | GY   | 4B | AX.89530566 | 1.22E+07 | 0.07 | -3.78    | 3.19 | 0.04 |
| E2 | GPM2 | 4B | AX.89676110 | 1.26E+06 | 0.31 | -562.81  | 3.46 | 0.05 |
| E2 | GPS  | 4B | AX.89697958 | 6.43E+08 | 0.29 | -1.63    | 3.72 | 0.05 |
| E2 | GPM2 | 4B | AX.89325823 | 1.32E+06 | 0.34 | -588.12  | 3.85 | 0.06 |
| E2 | GY   | 4B | AX.89611914 | 6.47E+08 | 0.23 | -2.60    | 3.95 | 0.07 |
| E2 | TKW  | 4B | AX.89313669 | 5.60E+05 | 0.32 | 0.97     | 3.13 | 0.05 |
| E2 | GPM2 | 4B | AX.89330007 | 6.58E+08 | 0.08 | -876.79  | 3.09 | 0.04 |
| E2 | TKW  | 4B | AX.89490058 | 5.60E+05 | 0.32 | 0.97     | 3.13 | 0.05 |



|    |      |    |             |          |      |          |      |      |
|----|------|----|-------------|----------|------|----------|------|------|
| E2 | GPS  | 4B | AX.89438962 | 1.31E+07 | 0.13 | -2.14    | 3.48 | 0.07 |
| E2 | TKW  | 4B | AX.89405169 | 5.61E+05 | 0.32 | 0.97     | 3.13 | 0.05 |
| E2 | TKW  | 4B | AX.89555854 | 1.11E+06 | 0.35 | 1.00     | 3.39 | 0.06 |
| E2 | TKW  | 4B | AX.89450204 | 1.27E+06 | 0.36 | 0.99     | 3.36 | 0.06 |
| E2 | GPM2 | 4B | AX.89693470 | 1.25E+06 | 0.31 | -562.81  | 3.46 | 0.05 |
| E2 | TKW  | 4B | AX.89348247 | 1.27E+06 | 0.36 | 0.99     | 3.36 | 0.06 |
| E2 | GPM2 | 4B | AX.89450204 | 1.27E+06 | 0.36 | -645.24  | 4.66 | 0.08 |
| E2 | GPS  | 4B | AX.89311940 | 6.43E+08 | 0.29 | -1.63    | 3.72 | 0.05 |
| E2 | GPS  | 4B | AX.89604454 | 6.43E+08 | 0.29 | -1.63    | 3.72 | 0.05 |
| E2 | GPM2 | 4B | AX.89545685 | 1.25E+06 | 0.36 | -645.24  | 4.66 | 0.08 |
| E2 | TKW  | 4B | AX.89340425 | 1.26E+06 | 0.36 | 0.99     | 3.36 | 0.06 |
| E2 | TKW  | 4B | AX.89670164 | 1.26E+06 | 0.36 | 0.99     | 3.36 | 0.06 |
| E2 | GPS  | 4B | AX.89728605 | 6.43E+08 | 0.29 | -1.63    | 3.72 | 0.05 |
| E2 | TKW  | 4B | AX.89318677 | 1.27E+06 | 0.36 | 0.99     | 3.36 | 0.06 |
| E2 | GPS  | 4B | AX.89430679 | 6.43E+08 | 0.29 | -1.63    | 3.72 | 0.05 |
| E2 | TKW  | 4B | AX.89650899 | 5.61E+05 | 0.32 | 0.97     | 3.13 | 0.05 |
| E2 | TKW  | 4B | AX.89407895 | 5.60E+05 | 0.32 | 0.97     | 3.13 | 0.05 |
| E2 | TKW  | 4B | AX.89582667 | 1.06E+06 | 0.15 | 1.34     | 3.48 | 0.06 |
| E2 | TKW  | 4B | AX.89311787 | 1.27E+06 | 0.36 | 0.99     | 3.36 | 0.06 |
| E2 | TKW  | 4B | AX.89439714 | 1.26E+06 | 0.36 | 0.99     | 3.36 | 0.06 |
| E2 | GPM2 | 4B | AX.89608391 | 1.05E+06 | 0.18 | -763.15  | 4.20 | 0.08 |
| E2 | GPS  | 4B | AX.89705325 | 6.43E+08 | 0.29 | -1.63    | 3.72 | 0.05 |
| E2 | TKW  | 4B | AX.89424041 | 1.26E+06 | 0.36 | 0.99     | 3.36 | 0.06 |
| E2 | TKW  | 4B | AX.89500414 | 5.60E+05 | 0.32 | 0.97     | 3.13 | 0.05 |
| E2 | GPM2 | 4B | AX.89482708 | 2.37E+05 | 0.31 | -555.75  | 3.37 | 0.05 |
| E2 | GPM2 | 4B | AX.89492174 | 1.26E+07 | 0.05 | -1173.39 | 3.19 | 0.07 |
| E2 | GPM2 | 4B | AX.89586227 | 1.32E+06 | 0.36 | -645.24  | 4.66 | 0.08 |
| E2 | GPM2 | 4B | AX.89764813 | 2.39E+08 | 0.08 | -880.19  | 3.04 | 0.04 |
| E2 | TKW  | 4B | AX.89433236 | 1.27E+06 | 0.36 | 0.99     | 3.36 | 0.06 |
| E2 | GPS  | 4B | AX.89507497 | 6.43E+08 | 0.29 | -1.63    | 3.72 | 0.05 |
| E3 | GPM2 | 4B | AX.89581777 | 3.80E+07 | 0.39 | 948.31   | 3.41 | 0.00 |
| E3 | GPM2 | 4B | AX.89574801 | 3.80E+07 | 0.40 | 996.01   | 3.79 | 0.00 |
| E3 | GPM2 | 4B | AX.89331938 | 3.80E+07 | 0.40 | 1023.29  | 3.93 | 0.00 |
| E3 | GPM2 | 4B | AX.89319283 | 3.80E+07 | 0.40 | 905.99   | 3.19 | 0.00 |
| E3 | GPM2 | 4B | AX.89462446 | 3.80E+07 | 0.39 | 958.97   | 3.51 | 0.00 |
| E3 | GPM2 | 4B | AX.89440374 | 3.80E+07 | 0.39 | 925.01   | 3.30 | 0.00 |
| E3 | GPM2 | 4B | AX.89716019 | 3.80E+07 | 0.39 | 958.97   | 3.51 | 0.00 |
| E3 | GPM2 | 4B | AX.89484647 | 3.82E+07 | 0.39 | 958.97   | 3.51 | 0.00 |
| E3 | GPM2 | 4B | AX.89313304 | 3.83E+07 | 0.40 | 923.87   | 3.31 | 0.00 |
| E3 | GPM2 | 4B | AX.89593486 | 3.83E+07 | 0.40 | 1023.29  | 3.93 | 0.00 |
| E3 | GPM2 | 4B | AX.89607364 | 3.83E+07 | 0.40 | 1023.29  | 3.93 | 0.00 |
| E3 | GPM2 | 4B | AX.89645483 | 1.07E+07 | 0.33 | -949.88  | 3.13 | 0.06 |
| E3 | GPM2 | 4B | AX.89638915 | 1.07E+07 | 0.32 | -1013.42 | 3.30 | 0.07 |
| E3 | GPM2 | 4B | AX.89609811 | 1.08E+07 | 0.32 | -1004.06 | 3.20 | 0.07 |
| E3 | GPM2 | 4B | AX.89654556 | 1.08E+07 | 0.33 | -1018.46 | 3.29 | 0.07 |
| E3 | GPM2 | 4B | AX.89575125 | 1.08E+07 | 0.33 | -1018.46 | 3.29 | 0.07 |
| E3 | GPM2 | 4B | AX.89691011 | 3.66E+07 | 0.42 | 867.11   | 3.12 | 0.00 |
| E3 | GPM2 | 4B | AX.89544790 | 3.70E+07 | 0.42 | 855.35   | 3.07 | 0.00 |
| E3 | GPM2 | 4B | AX.89771160 | 3.70E+07 | 0.42 | 888.30   | 3.26 | 0.00 |
| E3 | GPM2 | 4B | AX.89403459 | 3.71E+07 | 0.42 | 888.30   | 3.26 | 0.00 |

|    |      |    |             |          |      |         |      |      |
|----|------|----|-------------|----------|------|---------|------|------|
| E3 | GPM2 | 4B | AX.89611058 | 3.71E+07 | 0.42 | 888.30  | 3.26 | 0.00 |
| E3 | GPM2 | 4B | AX.89740017 | 3.71E+07 | 0.42 | 886.91  | 3.25 | 0.00 |
| E3 | GPM2 | 4B | AX.89447599 | 3.71E+07 | 0.42 | 899.36  | 3.31 | 0.00 |
| E3 | GPM2 | 4B | AX.89560106 | 3.75E+07 | 0.39 | 956.90  | 3.52 | 0.00 |
| E3 | GPM2 | 4B | AX.89508296 | 3.77E+07 | 0.50 | 949.45  | 3.37 | 0.00 |
| E3 | GPM2 | 4B | AX.89349947 | 3.78E+07 | 0.49 | 1009.30 | 3.74 | 0.00 |
| E3 | GPM2 | 4B | AX.89313597 | 3.78E+07 | 0.49 | 1009.30 | 3.74 | 0.00 |
| E3 | GPM2 | 4B | AX.89412368 | 3.78E+07 | 0.49 | 1009.30 | 3.74 | 0.00 |
| E3 | GPM2 | 4B | AX.89459443 | 3.78E+07 | 0.50 | 937.47  | 3.27 | 0.00 |
| E3 | GPM2 | 4B | AX.89511248 | 3.78E+07 | 0.38 | 991.01  | 3.70 | 0.00 |
| E3 | GPM2 | 4B | AX.89707434 | 3.79E+07 | 0.49 | 971.45  | 3.48 | 0.00 |
| E3 | GPM2 | 4B | AX.89505881 | 3.79E+07 | 0.50 | 937.47  | 3.27 | 0.00 |
| E3 | GPM2 | 4B | AX.89766617 | 3.79E+07 | 0.39 | 958.97  | 3.51 | 0.00 |
| E3 | GPM2 | 4B | AX.89391627 | 3.79E+07 | 0.50 | 937.47  | 3.27 | 0.00 |
| E3 | GPM2 | 4B | AX.89552410 | 3.79E+07 | 0.39 | 958.97  | 3.51 | 0.00 |
| E3 | GPM2 | 4B | AX.89526525 | 3.79E+07 | 0.50 | 937.47  | 3.27 | 0.00 |
| E3 | GPM2 | 4B | AX.89669200 | 3.79E+07 | 0.39 | 958.97  | 3.51 | 0.00 |
| E3 | GPM2 | 4B | AX.89410142 | 3.79E+07 | 0.39 | 958.97  | 3.51 | 0.00 |
| E3 | GPM2 | 4B | AX.89486339 | 3.79E+07 | 0.40 | 928.69  | 3.35 | 0.00 |
| E3 | GPM2 | 4B | AX.89698371 | 3.79E+07 | 0.39 | 958.97  | 3.51 | 0.00 |
| E3 | GPM2 | 4B | AX.89495103 | 3.79E+07 | 0.39 | 958.97  | 3.51 | 0.00 |
| E3 | GPM2 | 4B | AX.89627885 | 3.79E+07 | 0.39 | 880.75  | 3.07 | 0.00 |
| E3 | GPM2 | 4B | AX.89478813 | 3.79E+07 | 0.39 | 958.97  | 3.51 | 0.00 |
| E3 | GPM2 | 4B | AX.89546302 | 3.79E+07 | 0.39 | 958.97  | 3.51 | 0.00 |
| E3 | GPM2 | 4B | AX.89542473 | 3.79E+07 | 0.40 | 909.03  | 3.20 | 0.00 |
| E3 | GPM2 | 4B | AX.89400517 | 3.79E+07 | 0.39 | 895.77  | 3.14 | 0.00 |
| E3 | GPM2 | 4B | AX.89425228 | 3.80E+07 | 0.39 | 958.97  | 3.51 | 0.00 |
| E3 | GPM2 | 4B | AX.89378460 | 3.80E+07 | 0.41 | 894.95  | 3.17 | 0.00 |
| E3 | GPM2 | 4B | AX.89506349 | 3.80E+07 | 0.38 | 900.28  | 3.20 | 0.00 |
| E3 | GPM2 | 4B | AX.89314466 | 3.80E+07 | 0.40 | 928.69  | 3.35 | 0.00 |
| E3 | GPM2 | 4B | AX.89689545 | 3.80E+07 | 0.40 | 928.69  | 3.35 | 0.00 |
| E3 | GPM2 | 4B | AX.89656295 | 3.80E+07 | 0.40 | 970.77  | 3.60 | 0.00 |
| E3 | GPM2 | 4B | AX.89599240 | 3.80E+07 | 0.40 | 928.69  | 3.35 | 0.00 |
| E3 | GPM2 | 4B | AX.89677554 | 3.80E+07 | 0.40 | 923.87  | 3.31 | 0.00 |
| E3 | GPM2 | 4B | AX.89356176 | 3.80E+07 | 0.40 | 928.69  | 3.35 | 0.00 |
| E3 | GPM2 | 4B | AX.89504489 | 3.80E+07 | 0.39 | 998.36  | 3.79 | 0.00 |
| E3 | GPM2 | 4B | AX.89706774 | 3.83E+07 | 0.40 | 928.69  | 3.35 | 0.00 |
| E3 | GPM2 | 4B | AX.89768844 | 3.83E+07 | 0.41 | 944.37  | 3.49 | 0.00 |
| E3 | GPM2 | 4B | AX.89677774 | 3.83E+07 | 0.40 | 987.72  | 3.74 | 0.00 |
| E3 | GPM2 | 4B | AX.89709952 | 3.83E+07 | 0.40 | 922.80  | 3.33 | 0.00 |
| E3 | GPM2 | 4B | AX.89686862 | 3.83E+07 | 0.40 | 966.17  | 3.60 | 0.00 |
| E3 | GPM2 | 4B | AX.89571155 | 3.83E+07 | 0.41 | 950.36  | 3.50 | 0.00 |
| E3 | GPM2 | 4B | AX.89601831 | 3.84E+07 | 0.41 | 900.57  | 3.20 | 0.00 |
| E3 | GPM2 | 4B | AX.89668547 | 3.84E+07 | 0.40 | 914.96  | 3.24 | 0.00 |
| E3 | GPM2 | 4B | AX.89590856 | 3.84E+07 | 0.41 | 892.10  | 3.16 | 0.00 |
| E3 | GPM2 | 4B | AX.89577229 | 3.85E+07 | 0.41 | 1042.48 | 4.04 | 0.00 |
| E3 | GPM2 | 4B | AX.89324506 | 3.86E+07 | 0.41 | 915.37  | 3.30 | 0.00 |
| E3 | GPM2 | 4B | AX.89472850 | 3.86E+07 | 0.41 | 870.96  | 3.01 | 0.00 |
| E3 | GPM2 | 4B | AX.89677501 | 3.86E+07 | 0.40 | 892.06  | 3.14 | 0.00 |
| E3 | GPM2 | 4B | AX.89333449 | 3.86E+07 | 0.38 | 914.61  | 3.29 | 0.00 |

|    |      |    |               |          |      |         |      |      |
|----|------|----|---------------|----------|------|---------|------|------|
| E3 | GPM2 | 4B | AX.89460204   | 3.86E+07 | 0.41 | 935.67  | 3.40 | 0.00 |
| E3 | GPM2 | 4B | AX.89382467   | 3.86E+07 | 0.40 | 928.68  | 3.35 | 0.00 |
| E3 | GPM2 | 4B | AX.89614135   | 3.86E+07 | 0.41 | 950.36  | 3.50 | 0.00 |
| E3 | GPM2 | 4B | AX.89344066   | 3.86E+07 | 0.41 | 950.36  | 3.50 | 0.00 |
| E3 | GPM2 | 4B | AX.89603525   | 3.86E+07 | 0.41 | 950.36  | 3.50 | 0.00 |
| E3 | GPM2 | 4B | AX.89762834   | 3.87E+07 | 0.41 | 885.68  | 3.11 | 0.00 |
| E3 | GPM2 | 4B | AX.89683291   | 3.87E+07 | 0.41 | 885.68  | 3.11 | 0.00 |
| E3 | GPM2 | 4B | AX.89328964   | 3.87E+07 | 0.41 | 885.68  | 3.11 | 0.00 |
| E3 | GPM2 | 4B | AX.89741879   | 3.88E+07 | 0.42 | 898.22  | 3.22 | 0.00 |
| E3 | GPM2 | 4B | AX.89702921   | 3.88E+07 | 0.42 | 864.37  | 3.03 | 0.00 |
| E3 | GPM2 | 4B | AX.89680320   | 6.60E+08 | 0.34 | 1010.11 | 3.32 | 0.10 |
| E3 | GPS  | 4B | AX.89343363   | 2.96E+07 | 0.30 | -2.38   | 3.79 | 0.02 |
| E3 | GPS  | 4B | AX.89382876   | 3.06E+07 | 0.28 | -2.41   | 3.69 | 0.01 |
| E3 | GY   | 4B | AX.89645483   | 1.07E+07 | 0.33 | -3.51   | 3.75 | 0.05 |
| E3 | GY   | 4B | AX.89638915   | 1.07E+07 | 0.32 | -3.46   | 3.46 | 0.04 |
| E3 | GY   | 4B | AX.89609811   | 1.08E+07 | 0.32 | -3.57   | 3.59 | 0.04 |
| E3 | GY   | 4B | AX.89654556   | 1.08E+07 | 0.33 | -3.52   | 3.52 | 0.04 |
| E3 | GY   | 4B | AX.89575125   | 1.08E+07 | 0.33 | -3.52   | 3.52 | 0.04 |
| E3 | TKW  | 4B | AX.89743794   | 1.67E+07 | 0.25 | -1.05   | 3.42 | 0.05 |
| E3 | TKW  | 4B | AX.89563300   | 1.67E+07 | 0.25 | -1.05   | 3.42 | 0.05 |
| E3 | TKW  | 4B | AX.89363633   | 1.68E+07 | 0.24 | -1.03   | 3.33 | 0.05 |
| E3 | TKW  | 4B | AX.89752007   | 2.40E+07 | 0.09 | -1.44   | 3.01 | 0.02 |
| E3 | TKW  | 4B | AX.89578058   | 2.40E+07 | 0.10 | -1.43   | 3.04 | 0.01 |
| E3 | TKW  | 4B | AX.89678773   | 6.44E+08 | 0.30 | 0.93    | 3.01 | 0.11 |
| E3 | TKW  | 4B | AX.89613001   | 6.44E+08 | 0.30 | 0.96    | 3.19 | 0.11 |
| E3 | TKW  | 4B | AX.89360797   | 6.44E+08 | 0.31 | 0.96    | 3.24 | 0.09 |
| E3 | TKW  | 4B | AX.89439656   | 6.44E+08 | 0.31 | 0.99    | 3.38 | 0.10 |
| E3 | TKW  | 4B | AX.89520658   | 6.44E+08 | 0.31 | 0.96    | 3.24 | 0.09 |
| E3 | TKW  | 4B | AX.89722219   | 6.44E+08 | 0.32 | 1.06    | 3.87 | 0.11 |
| E3 | TKW  | 4B | X.89621181_OT | 6.45E+08 | 0.26 | 1.05    | 3.58 | 0.11 |
| E3 | TKW  | 4B | X.89773162_OT | 6.45E+08 | 0.26 | 1.01    | 3.29 | 0.11 |
| E3 | TKW  | 4B | AX.89639340   | 6.45E+08 | 0.31 | 0.96    | 3.24 | 0.09 |
| E3 | TKW  | 4B | X.89718419_OT | 6.45E+08 | 0.26 | 0.96    | 3.01 | 0.11 |
| E3 | TKW  | 4B | AX.89568959   | 6.45E+08 | 0.31 | 0.96    | 3.24 | 0.09 |
| E3 | TKW  | 4B | X.89732621_OT | 6.45E+08 | 0.26 | 1.07    | 3.66 | 0.11 |
| E3 | TKW  | 4B | AX.89664022   | 6.45E+08 | 0.30 | 0.93    | 3.07 | 0.10 |
| E3 | TKW  | 4B | AX.89728470   | 6.45E+08 | 0.27 | 1.05    | 3.50 | 0.12 |
| E3 | TKW  | 4B | AX.89710722   | 6.45E+08 | 0.30 | 0.94    | 3.20 | 0.10 |
| E3 | TKW  | 4B | AX.89642563   | 6.45E+08 | 0.30 | 0.91    | 3.01 | 0.10 |
| E3 | TKW  | 4B | AX.89524337   | 6.54E+08 | 0.32 | 0.88    | 3.01 | 0.08 |
| E3 | TKW  | 4B | AX.89415046   | 6.54E+08 | 0.32 | 0.88    | 3.01 | 0.08 |
| E3 | TKW  | 4B | AX.89327826   | 6.54E+08 | 0.32 | 0.88    | 3.01 | 0.08 |
| E3 | TKW  | 4B | AX.89636167   | 6.54E+08 | 0.32 | 0.88    | 3.01 | 0.08 |
| E3 | TKW  | 4B | AX.89459222   | 6.54E+08 | 0.32 | 0.88    | 3.01 | 0.08 |
| E3 | TKW  | 4B | AX.89390456   | 6.54E+08 | 0.32 | 0.88    | 3.01 | 0.08 |
| E3 | TKW  | 4B | AX.89701603   | 6.54E+08 | 0.32 | 0.88    | 3.01 | 0.08 |
| E3 | TKW  | 4B | AX.89651761   | 6.54E+08 | 0.32 | 0.88    | 3.01 | 0.08 |
| E3 | TKW  | 4B | AX.89448796   | 6.54E+08 | 0.32 | 0.88    | 3.01 | 0.08 |
| E3 | TKW  | 4B | AX.89546654   | 6.61E+08 | 0.26 | 1.03    | 3.57 | 0.15 |
| E3 | TKW  | 4B | AX.89428631   | 6.61E+08 | 0.26 | 1.04    | 3.62 | 0.15 |

|    |      |    |             |          |      |       |      |      |
|----|------|----|-------------|----------|------|-------|------|------|
| E3 | TKW  | 4B | AX.89681705 | 6.61E+08 | 0.26 | 1.03  | 3.57 | 0.15 |
| E3 | TKW  | 4B | AX.89386305 | 6.61E+08 | 0.26 | 1.08  | 3.82 | 0.16 |
| E3 | TKW  | 4B | AX.89383901 | 6.61E+08 | 0.26 | 1.08  | 3.82 | 0.16 |
| E3 | TKW  | 4B | AX.89642301 | 6.61E+08 | 0.26 | 1.08  | 3.82 | 0.16 |
| E3 | TKW  | 4B | AX.89764222 | 6.61E+08 | 0.26 | 1.08  | 3.82 | 0.16 |
| E3 | TKW  | 4B | AX.89563454 | 6.61E+08 | 0.26 | 1.08  | 3.82 | 0.16 |
| E3 | SPM2 | 4B | AX.89731825 | 1.40E+07 | 0.33 | 20.07 | 3.17 | 0.05 |
| E3 | TKW  | 4B | AX.89527670 | 6.61E+08 | 0.47 | -0.85 | 3.24 | 0.05 |
| E3 | TKW  | 4B | AX.89664514 | 6.61E+08 | 0.28 | -0.92 | 3.14 | 0.01 |
| E3 | TKW  | 4B | AX.89664380 | 6.61E+08 | 0.26 | 1.08  | 3.82 | 0.16 |
| E3 | TKW  | 4B | AX.89605438 | 6.61E+08 | 0.26 | 1.08  | 3.82 | 0.16 |
| E3 | TKW  | 4B | AX.89461756 | 6.61E+08 | 0.26 | 0.96  | 3.19 | 0.16 |
| E3 | TKW  | 4B | AX.89482856 | 6.61E+08 | 0.26 | 1.08  | 3.82 | 0.16 |
| E3 | TKW  | 4B | AX.89726222 | 6.61E+08 | 0.26 | 1.08  | 3.82 | 0.16 |
| E3 | TKW  | 4B | AX.89722985 | 6.61E+08 | 0.26 | 1.03  | 3.51 | 0.15 |
| E3 | TKW  | 4B | AX.89534747 | 6.61E+08 | 0.26 | 1.08  | 3.82 | 0.16 |
| E3 | TKW  | 4B | AX.89575759 | 6.61E+08 | 0.26 | 1.08  | 3.82 | 0.16 |
| E3 | TKW  | 4B | AX.89447537 | 6.61E+08 | 0.47 | -0.88 | 3.35 | 0.06 |
| E4 | GPS  | 4B | AX.89731957 | 6.69E+08 | 0.17 | -1.93 | 3.01 | 0.07 |
| E4 | TKW  | 4B | AX.89743794 | 1.67E+07 | 0.25 | -0.97 | 3.06 | 0.03 |
| E4 | TKW  | 4B | AX.89563300 | 1.67E+07 | 0.25 | -0.97 | 3.06 | 0.03 |
| E4 | TKW  | 4B | AX.89309886 | 1.68E+07 | 0.29 | -0.90 | 3.03 | 0.05 |
| E1 | SPM2 | 4D | AX.89666096 | 2.48E+07 | 0.44 | 17.17 | 3.28 | 0.05 |
| E1 | GY   | 4D | AX.89484971 | 3.49E+08 | 0.09 | -4.28 | 3.39 | 0.05 |
| E1 | SPM2 | 4D | AX.89395719 | 6.72E+07 | 0.14 | 26.69 | 3.77 | 0.07 |
| E1 | SPM2 | 4D | AX.89582063 | 1.13E+08 | 0.38 | 17.73 | 3.34 | 0.06 |
| E1 | SPM2 | 4D | AX.89577388 | 3.54E+08 | 0.28 | 18.17 | 3.08 | 0.05 |
| E1 | GY   | 4D | AX.89310874 | 3.40E+08 | 0.09 | -4.28 | 3.39 | 0.05 |
| E1 | SPM2 | 4D | AX.89523903 | 2.06E+07 | 0.34 | 18.67 | 3.51 | 0.06 |
| E1 | SPM2 | 4D | AX.89474282 | 1.12E+08 | 0.39 | 17.11 | 3.15 | 0.06 |
| E1 | GY   | 4D | AX.89714193 | 1.08E+08 | 0.38 | 2.41  | 3.16 | 0.06 |
| E1 | SPM2 | 4D | AX.89648476 | 6.90E+07 | 0.11 | 31.71 | 4.31 | 0.08 |
| E1 | SPM2 | 4D | AX.89348065 | 2.17E+07 | 0.33 | 17.67 | 3.11 | 0.05 |
| E1 | SPM2 | 4D | AX.89705815 | 2.54E+07 | 0.44 | 16.40 | 3.04 | 0.05 |
| E1 | SPM2 | 4D | AX.89526164 | 2.05E+07 | 0.33 | 17.67 | 3.11 | 0.05 |
| E1 | GY   | 4D | AX.89363319 | 3.46E+08 | 0.09 | -4.28 | 3.39 | 0.05 |
| E1 | GY   | 4D | AX.89363319 | 3.46E+08 | 0.09 | -4.28 | 3.39 | 0.05 |
| E1 | SPM2 | 4D | AX.89695623 | 6.72E+07 | 0.14 | 26.69 | 3.77 | 0.07 |
| E1 | SPM2 | 4D | AX.89319213 | 2.01E+07 | 0.31 | 20.09 | 3.78 | 0.06 |
| E1 | GY   | 4D | AX.89484971 | 3.49E+08 | 0.09 | -4.28 | 3.39 | 0.05 |
| E1 | GY   | 4D | AX.89310874 | 3.40E+08 | 0.09 | -4.28 | 3.39 | 0.05 |
| E1 | GY   | 4D | AX.89454347 | 2.38E+08 | 0.07 | -4.86 | 3.51 | 0.07 |
| E1 | SPM2 | 4D | AX.89317994 | 8.95E+07 | 0.35 | 17.27 | 3.09 | 0.05 |
| E1 | GY   | 4D | AX.89568572 | 1.08E+08 | 0.38 | 2.41  | 3.16 | 0.06 |
| E1 | GY   | 4D | AX.89348065 | 2.17E+07 | 0.33 | 2.74  | 3.72 | 0.06 |
| E1 | SPM2 | 4D | AX.89317557 | 4.23E+07 | 0.13 | 27.18 | 3.60 | 0.06 |
| E1 | GY   | 4D | AX.89721792 | 4.39E+08 | 0.09 | -4.44 | 3.76 | 0.06 |
| E1 | GY   | 4D | AX.89348065 | 2.17E+07 | 0.33 | 2.74  | 3.72 | 0.06 |
| E1 | GY   | 4D | AX.89672119 | 3.44E+08 | 0.09 | -4.28 | 3.39 | 0.05 |
| E1 | GY   | 4D | AX.89412785 | 4.36E+08 | 0.47 | 2.37  | 3.23 | 0.06 |

|    |      |    |             |          |      |          |      |      |
|----|------|----|-------------|----------|------|----------|------|------|
| E1 | SPM2 | 4D | AX.89686896 | 3.52E+08 | 0.32 | 18.55    | 3.38 | 0.06 |
| E1 | GY   | 4D | AX.89523903 | 2.06E+07 | 0.34 | 2.56     | 3.39 | 0.05 |
| E1 | GY   | 4D | AX.89630243 | 4.39E+08 | 0.09 | -4.44    | 3.76 | 0.06 |
| E1 | GY   | 4D | AX.89555421 | 3.37E+08 | 0.05 | -5.91    | 3.82 | 0.06 |
| E1 | GY   | 4D | AX.89454347 | 2.38E+08 | 0.07 | -4.86    | 3.51 | 0.07 |
| E1 | SPM2 | 4D | AX.89558809 | 4.99E+07 | 0.11 | 30.70    | 4.07 | 0.07 |
| E1 | GY   | 4D | AX.89721792 | 4.39E+08 | 0.09 | -4.44    | 3.76 | 0.06 |
| E1 | GY   | 4D | AX.89672119 | 3.44E+08 | 0.09 | -4.28    | 3.39 | 0.05 |
| E1 | GY   | 4D | AX.89412785 | 4.36E+08 | 0.47 | 2.37     | 3.23 | 0.06 |
| E1 | GY   | 4D | AX.89767153 | 3.37E+08 | 0.05 | -5.91    | 3.82 | 0.06 |
| E1 | GY   | 4D | AX.89767153 | 3.37E+08 | 0.05 | -5.91    | 3.82 | 0.06 |
| E1 | SPM2 | 4D | AX.89405319 | 1.92E+07 | 0.43 | 18.56    | 3.73 | 0.06 |
| E1 | GY   | 4D | AX.89473091 | 3.35E+08 | 0.05 | -5.91    | 3.82 | 0.06 |
| E1 | GPS  | 4D | AX.89617408 | 3.80E+08 | 0.20 | -1.44    | 3.30 | 0.06 |
| E1 | GY   | 4D | AX.89555421 | 3.37E+08 | 0.05 | -5.91    | 3.82 | 0.06 |
| E1 | GY   | 4D | AX.89526164 | 2.05E+07 | 0.33 | 2.74     | 3.72 | 0.06 |
| E1 | GY   | 4D | AX.89489620 | 3.46E+08 | 0.09 | -3.99    | 3.12 | 0.05 |
| E1 | GY   | 4D | AX.89505725 | 3.46E+07 | 0.17 | 3.49     | 3.90 | 0.07 |
| E1 | GY   | 4D | AX.89714193 | 1.08E+08 | 0.38 | 2.41     | 3.16 | 0.06 |
| E1 | GY   | 4D | AX.89523903 | 2.06E+07 | 0.34 | 2.56     | 3.39 | 0.05 |
| E1 | GPS  | 4D | AX.89769177 | 3.85E+08 | 0.08 | -2.32    | 3.93 | 0.07 |
| E1 | GY   | 4D | AX.89575836 | 3.59E+06 | 0.49 | 2.37     | 3.25 | 0.06 |
| E1 | GY   | 4D | AX.89669740 | 3.59E+06 | 0.49 | 2.37     | 3.25 | 0.06 |
| E1 | GY   | 4D | AX.89669740 | 3.59E+06 | 0.49 | 2.37     | 3.25 | 0.06 |
| E1 | GY   | 4D | AX.89526164 | 2.05E+07 | 0.33 | 2.74     | 3.72 | 0.06 |
| E1 | SPM2 | 4D | AX.89329068 | 6.92E+07 | 0.13 | 28.22    | 3.95 | 0.07 |
| E1 | SPM2 | 4D | AX.89484618 | 2.30E+07 | 0.45 | 17.66    | 3.46 | 0.05 |
| E1 | GY   | 4D | AX.89542428 | 3.51E+08 | 0.09 | -4.28    | 3.39 | 0.05 |
| E1 | GPM2 | 4D | AX.89342620 | 3.49E+08 | 0.07 | -1227.45 | 3.40 | 0.06 |
| E1 | GY   | 4D | AX.89473091 | 3.35E+08 | 0.05 | -5.91    | 3.82 | 0.06 |
| E1 | GPM2 | 4D | AX.89767153 | 3.37E+08 | 0.05 | -1574.91 | 4.07 | 0.07 |
| E1 | GPM2 | 4D | AX.89672119 | 3.44E+08 | 0.09 | -1235.53 | 4.14 | 0.07 |
| E1 | GPS  | 4D | AX.89413533 | 4.42E+08 | 0.13 | -1.69    | 3.28 | 0.06 |
| E1 | GPM2 | 4D | AX.89630243 | 4.39E+08 | 0.09 | -1084.67 | 3.44 | 0.06 |
| E1 | GY   | 4D | AX.89505725 | 3.46E+07 | 0.17 | 3.49     | 3.90 | 0.07 |
| E1 | GPM2 | 4D | AX.89327725 | 3.43E+08 | 0.07 | -1206.55 | 3.47 | 0.06 |
| E1 | GPM2 | 4D | AX.89484971 | 3.49E+08 | 0.09 | -1235.53 | 4.14 | 0.07 |
| E1 | GPM2 | 4D | AX.89454347 | 2.38E+08 | 0.07 | -1327.78 | 3.89 | 0.07 |
| E1 | GPM2 | 4D | AX.89449157 | 3.54E+08 | 0.07 | -1206.55 | 3.47 | 0.06 |
| E1 | GPM2 | 4D | AX.89542428 | 3.51E+08 | 0.09 | -1235.53 | 4.14 | 0.07 |
| E1 | GY   | 4D | AX.89542428 | 3.51E+08 | 0.09 | -4.28    | 3.39 | 0.05 |
| E1 | GPM2 | 4D | AX.89621529 | 5.35E+07 | 0.15 | -841.63  | 3.16 | 0.05 |
| E1 | GPM2 | 4D | AX.89669740 | 3.59E+06 | 0.49 | 717.70   | 4.31 | 0.08 |
| E1 | GY   | 4D | AX.89575836 | 3.59E+06 | 0.49 | 2.37     | 3.25 | 0.06 |
| E1 | GPM2 | 4D | AX.89617408 | 3.80E+08 | 0.20 | -721.47  | 3.01 | 0.05 |
| E1 | GY   | 4D | AX.89630243 | 4.39E+08 | 0.09 | -4.44    | 3.76 | 0.06 |
| E1 | GPM2 | 4D | AX.89489620 | 3.46E+08 | 0.09 | -1172.17 | 3.94 | 0.07 |
| E1 | GPM2 | 4D | AX.89715863 | 4.55E+08 | 0.35 | -631.10  | 3.20 | 0.05 |
| E1 | GPM2 | 4D | AX.89596400 | 4.55E+08 | 0.33 | -616.22  | 3.00 | 0.05 |
| E1 | GY   | 4D | AX.89568572 | 1.08E+08 | 0.38 | 2.41     | 3.16 | 0.06 |

|    |      |    |             |          |      |          |      |      |
|----|------|----|-------------|----------|------|----------|------|------|
| E1 | GPM2 | 4D | AX.89479312 | 3.46E+08 | 0.07 | -1206.55 | 3.47 | 0.06 |
| E1 | GPM2 | 4D | AX.89766381 | 4.55E+08 | 0.34 | -668.50  | 3.47 | 0.06 |
| E1 | GPM2 | 4D | AX.89661082 | 3.48E+08 | 0.07 | -1206.55 | 3.47 | 0.06 |
| E1 | GY   | 4D | AX.89489620 | 3.46E+08 | 0.09 | -3.99    | 3.12 | 0.05 |
| E1 | GPM2 | 4D | AX.89575836 | 3.59E+06 | 0.49 | 717.70   | 4.31 | 0.08 |
| E1 | GPM2 | 4D | AX.89363319 | 3.46E+08 | 0.09 | -1235.53 | 4.14 | 0.07 |
| E1 | GPM2 | 4D | AX.89525279 | 4.55E+08 | 0.35 | -631.10  | 3.20 | 0.05 |
| E1 | GPM2 | 4D | AX.89473091 | 3.35E+08 | 0.05 | -1574.91 | 4.07 | 0.07 |
| E1 | GPM2 | 4D | AX.89310874 | 3.40E+08 | 0.09 | -1235.53 | 4.14 | 0.07 |
| E1 | GPM2 | 4D | AX.89721792 | 4.39E+08 | 0.09 | -1084.67 | 3.44 | 0.06 |
| E1 | GPM2 | 4D | AX.89481823 | 3.53E+08 | 0.07 | -1206.55 | 3.47 | 0.06 |
| E1 | GPM2 | 4D | AX.89692908 | 4.55E+08 | 0.35 | -612.41  | 3.02 | 0.05 |
| E1 | GPM2 | 4D | AX.89700742 | 3.49E+08 | 0.07 | -1206.55 | 3.47 | 0.06 |
| E1 | TKW  | 4D | AX.89353662 | 4.64E+08 | 0.43 | -0.92    | 3.55 | 0.06 |
| E1 | GPM2 | 4D | AX.89492683 | 5.25E+07 | 0.15 | -841.63  | 3.16 | 0.05 |
| E1 | GPM2 | 4D | AX.89555421 | 3.37E+08 | 0.05 | -1574.91 | 4.07 | 0.07 |
| E1 | GPM2 | 4D | AX.89504136 | 3.48E+08 | 0.07 | -1206.55 | 3.47 | 0.06 |
| E2 | SPM2 | 4D | AX.89643657 | 2.84E+07 | 0.14 | -17.07   | 3.12 | 0.05 |
| E2 | SPM2 | 4D | AX.89499126 | 1.46E+07 | 0.12 | 18.18    | 3.13 | 0.05 |
| E2 | GPS  | 4D | AX.89721792 | 4.39E+08 | 0.09 | -2.39    | 3.40 | 0.05 |
| E2 | GPS  | 4D | AX.89630243 | 4.39E+08 | 0.09 | -2.39    | 3.40 | 0.05 |
| E2 | GY   | 4D | AX.89454347 | 2.38E+08 | 0.07 | -3.92    | 3.30 | 0.07 |
| E2 | GY   | 4D | AX.89454347 | 2.38E+08 | 0.07 | -3.92    | 3.30 | 0.07 |
| E2 | GPS  | 4D | AX.89688246 | 4.53E+08 | 0.15 | -1.83    | 3.07 | 0.05 |
| E2 | GPM2 | 4D | AX.89454347 | 2.38E+08 | 0.07 | -1023.71 | 3.42 | 0.08 |
| E3 | GPM2 | 4D | AX.89743408 | 3.25E+08 | 0.25 | -1019.66 | 3.15 | 0.10 |
| E3 | GPS  | 4D | AX.89630528 | 3.73E+08 | 0.32 | 2.59     | 3.99 | 0.11 |
| E3 | GPS  | 4D | AX.89540050 | 3.73E+08 | 0.32 | 2.62     | 4.07 | 0.11 |
| E3 | GPS  | 4D | AX.89723304 | 3.73E+08 | 0.32 | 2.59     | 3.99 | 0.11 |
| E3 | GPS  | 4D | AX.89405551 | 4.68E+08 | 0.38 | 2.28     | 3.23 | 0.11 |
| E3 | GPS  | 4D | AX.89326283 | 2.62E+07 | 0.45 | 2.02     | 3.04 | 0.07 |
| E3 | GPS  | 4D | AX.89755769 | 5.65E+07 | 0.17 | 3.17     | 4.12 | 0.07 |
| E3 | GPS  | 4D | AX.89639810 | 5.68E+07 | 0.17 | 3.17     | 4.12 | 0.07 |
| E3 | GPS  | 4D | AX.89532742 | 6.94E+07 | 0.18 | 2.71     | 3.21 | 0.05 |
| E3 | GPS  | 4D | AX.89408379 | 6.96E+07 | 0.18 | 2.71     | 3.21 | 0.05 |
| E3 | GPS  | 4D | AX.89547896 | 3.33E+08 | 0.37 | 2.00     | 3.10 | 0.07 |
| E3 | GPS  | 4D | AX.89743341 | 3.42E+08 | 0.07 | 4.11     | 3.07 | 0.09 |
| E3 | GPS  | 4D | AX.89419420 | 3.63E+08 | 0.21 | 2.99     | 4.54 | 0.09 |
| E3 | GPS  | 4D | AX.89674152 | 3.64E+08 | 0.18 | 3.22     | 4.63 | 0.10 |
| E3 | GPS  | 4D | AX.89604367 | 3.72E+08 | 0.33 | 2.70     | 4.33 | 0.12 |
| E3 | TKW  | 4D | AX.89326283 | 2.62E+07 | 0.45 | -0.84    | 3.02 | 0.05 |
| E3 | TKW  | 4D | AX.89502911 | 2.86E+07 | 0.48 | -0.88    | 3.09 | 0.03 |
| E3 | GY   | 4D | AX.89711898 | 6.25E+07 | 0.15 | -4.35    | 3.76 | 0.07 |
| E4 | SPM2 | 4D | AX.89696241 | 3.47E+07 | 0.32 | 18.63    | 3.39 | 0.07 |
| E4 | SPM2 | 4D | AX.89650900 | 6.28E+07 | 0.30 | 17.95    | 3.16 | 0.07 |
| E4 | SPM2 | 4D | AX.89671864 | 8.23E+07 | 0.09 | 29.18    | 3.13 | 0.03 |
| E4 | SPM2 | 4D | AX.89658806 | 8.31E+07 | 0.48 | 16.93    | 3.38 | 0.04 |
| E4 | SPM2 | 4D | AX.89408983 | 8.75E+07 | 0.09 | 29.72    | 3.21 | 0.03 |
| E4 | SPM2 | 4D | AX.89473487 | 9.28E+07 | 0.32 | 18.62    | 3.66 | 0.05 |
| E4 | SPM2 | 4D | AX.89406343 | 3.43E+08 | 0.15 | 26.27    | 4.23 | 0.08 |

|    |      |    |             |          |      |        |      |      |
|----|------|----|-------------|----------|------|--------|------|------|
| E1 | GY   | 5A | AX.89573968 | 4.79E+08 | 0.35 | 2.57   | 3.48 | 0.06 |
| E1 | GY   | 5A | AX.89529755 | 5.69E+08 | 0.21 | -2.78  | 3.08 | 0.04 |
| E1 | SPM2 | 5A | AX.89746268 | 4.82E+08 | 0.27 | -18.59 | 3.12 | 0.05 |
| E1 | SPM2 | 5A | AX.89443794 | 1.23E+06 | 0.32 | 18.41  | 3.36 | 0.05 |
| E1 | GY   | 5A | AX.89365450 | 5.79E+08 | 0.29 | -2.59  | 3.24 | 0.05 |
| E1 | GY   | 5A | AX.89674761 | 4.74E+08 | 0.07 | -6.37  | 5.70 | 0.10 |
| E1 | GY   | 5A | AX.89338520 | 5.70E+08 | 0.21 | -2.96  | 3.37 | 0.05 |
| E1 | GY   | 5A | AX.89401228 | 5.79E+08 | 0.28 | -2.95  | 3.99 | 0.06 |
| E1 | GY   | 5A | AX.89328890 | 4.55E+08 | 0.09 | -4.89  | 4.50 | 0.07 |
| E1 | GY   | 5A | AX.89416052 | 5.70E+08 | 0.21 | -2.78  | 3.08 | 0.04 |
| E1 | GY   | 5A | AX.89573968 | 4.79E+08 | 0.35 | 2.57   | 3.48 | 0.06 |
| E1 | GY   | 5A | AX.86184719 | 4.74E+08 | 0.07 | -6.37  | 5.70 | 0.10 |
| E1 | GY   | 5A | AX.89662391 | 5.81E+08 | 0.26 | -3.06  | 4.09 | 0.06 |
| E1 | GY   | 5A | AX.89577447 | 5.81E+08 | 0.36 | -2.86  | 4.22 | 0.06 |
| E1 | GY   | 5A | AX.89416052 | 5.70E+08 | 0.21 | -2.78  | 3.08 | 0.04 |
| E1 | GY   | 5A | AX.89674171 | 5.79E+08 | 0.28 | -2.77  | 3.57 | 0.05 |
| E1 | GY   | 5A | AX.89647546 | 5.79E+08 | 0.29 | -2.59  | 3.24 | 0.05 |
| E1 | GY   | 5A | AX.89390857 | 5.78E+08 | 0.29 | -2.59  | 3.24 | 0.05 |
| E1 | GY   | 5A | AX.86167542 | 4.79E+08 | 0.35 | 2.57   | 3.48 | 0.06 |
| E1 | GY   | 5A | AX.89532176 | 5.69E+08 | 0.21 | -2.78  | 3.08 | 0.04 |
| E1 | GY   | 5A | AX.89487661 | 5.79E+08 | 0.29 | -2.59  | 3.24 | 0.05 |
| E1 | GY   | 5A | AX.89560591 | 4.73E+08 | 0.07 | -5.29  | 4.33 | 0.07 |
| E1 | GY   | 5A | AX.89424196 | 5.65E+08 | 0.13 | -3.93  | 4.08 | 0.06 |
| E1 | GY   | 5A | AX.89332217 | 5.70E+08 | 0.20 | -3.18  | 3.77 | 0.06 |
| E1 | GY   | 5A | AX.89461701 | 5.79E+08 | 0.28 | -2.74  | 3.52 | 0.05 |
| E1 | GY   | 5A | AX.89593694 | 5.69E+08 | 0.21 | -2.82  | 3.11 | 0.05 |
| E1 | GY   | 5A | AX.89394142 | 4.72E+08 | 0.07 | -5.65  | 4.36 | 0.07 |
| E1 | GY   | 5A | AX.89500280 | 6.81E+08 | 0.13 | -4.20  | 4.34 | 0.07 |
| E1 | GY   | 5A | AX.89351708 | 5.81E+08 | 0.37 | -2.77  | 4.05 | 0.06 |
| E1 | GY   | 5A | AX.89532176 | 5.69E+08 | 0.21 | -2.78  | 3.08 | 0.04 |
| E1 | GY   | 5A | AX.89332916 | 4.73E+08 | 0.08 | -5.83  | 5.40 | 0.09 |
| E1 | GY   | 5A | AX.89494818 | 5.79E+08 | 0.28 | -2.74  | 3.52 | 0.05 |
| E1 | GY   | 5A | AX.89419923 | 4.79E+08 | 0.35 | 2.57   | 3.48 | 0.06 |
| E1 | GY   | 5A | AX.89419923 | 4.79E+08 | 0.35 | 2.57   | 3.48 | 0.06 |
| E1 | GY   | 5A | AX.89396437 | 3.66E+08 | 0.08 | -4.30  | 3.17 | 0.06 |
| E1 | GY   | 5A | AX.89381438 | 5.70E+08 | 0.20 | -2.86  | 3.10 | 0.05 |
| E1 | GY   | 5A | AX.89749828 | 4.73E+08 | 0.07 | -5.51  | 4.41 | 0.07 |
| E1 | GY   | 5A | AX.89550132 | 3.70E+08 | 0.09 | -4.47  | 3.70 | 0.07 |
| E1 | GY   | 5A | AX.89367689 | 5.74E+08 | 0.25 | -2.88  | 3.57 | 0.05 |
| E1 | GY   | 5A | AX.89358390 | 5.79E+08 | 0.28 | -2.74  | 3.52 | 0.05 |
| E1 | GY   | 5A | AX.89468147 | 5.80E+08 | 0.28 | -2.74  | 3.52 | 0.05 |
| E1 | GY   | 5A | AX.89461701 | 5.79E+08 | 0.28 | -2.74  | 3.52 | 0.05 |
| E1 | GY   | 5A | AX.89351708 | 5.81E+08 | 0.37 | -2.77  | 4.05 | 0.06 |
| E1 | GY   | 5A | AX.89347781 | 5.70E+08 | 0.20 | -2.86  | 3.10 | 0.05 |
| E1 | GY   | 5A | AX.89744768 | 5.80E+08 | 0.29 | -2.59  | 3.24 | 0.05 |
| E1 | SPM2 | 5A | AX.89574822 | 2.40E+06 | 0.25 | 19.80  | 3.33 | 0.06 |
| E1 | GY   | 5A | AX.89339851 | 5.70E+08 | 0.21 | -2.78  | 3.08 | 0.04 |
| E1 | GY   | 5A | AX.89373213 | 6.81E+08 | 0.13 | -3.88  | 3.89 | 0.06 |
| E1 | GY   | 5A | AX.89470458 | 6.81E+08 | 0.14 | -3.31  | 3.18 | 0.05 |
| E1 | GY   | 5A | AX.89749828 | 4.73E+08 | 0.07 | -5.51  | 4.41 | 0.07 |

|    |      |    |             |          |      |        |      |      |
|----|------|----|-------------|----------|------|--------|------|------|
| E1 | GY   | 5A | AX.89498567 | 5.69E+08 | 0.21 | -2.78  | 3.08 | 0.04 |
| E1 | GY   | 5A | AX.89776590 | 5.78E+08 | 0.29 | -2.59  | 3.24 | 0.05 |
| E1 | SPM2 | 5A | AX.89327629 | 1.87E+07 | 0.06 | 35.51  | 3.29 | 0.05 |
| E1 | GY   | 5A | AX.86167542 | 4.79E+08 | 0.35 | 2.57   | 3.48 | 0.06 |
| E1 | GY   | 5A | AX.89666351 | 5.79E+08 | 0.28 | -2.74  | 3.52 | 0.05 |
| E1 | GY   | 5A | AX.89613621 | 5.79E+08 | 0.27 | -2.74  | 3.46 | 0.05 |
| E1 | GY   | 5A | AX.89468147 | 5.80E+08 | 0.28 | -2.74  | 3.52 | 0.05 |
| E1 | GY   | 5A | AX.89662391 | 5.81E+08 | 0.26 | -3.06  | 4.09 | 0.06 |
| E1 | GY   | 5A | AX.89712014 | 4.77E+08 | 0.14 | -3.89  | 4.11 | 0.06 |
| E1 | GY   | 5A | AX.89712014 | 4.77E+08 | 0.14 | -3.89  | 4.11 | 0.06 |
| E1 | GY   | 5A | AX.89418657 | 4.73E+08 | 0.08 | -5.83  | 5.40 | 0.09 |
| E1 | GY   | 5A | AX.89528830 | 5.79E+08 | 0.28 | -2.74  | 3.52 | 0.05 |
| E1 | GY   | 5A | AX.89367689 | 5.74E+08 | 0.25 | -2.88  | 3.57 | 0.05 |
| E1 | GY   | 5A | AX.89554532 | 4.56E+08 | 0.08 | -5.00  | 4.12 | 0.07 |
| E1 | GY   | 5A | AX.89539733 | 4.75E+08 | 0.05 | -6.87  | 5.04 | 0.08 |
| E1 | GY   | 5A | AX.89348019 | 5.78E+08 | 0.29 | -2.59  | 3.24 | 0.05 |
| E1 | GY   | 5A | AX.89412668 | 5.69E+08 | 0.21 | -2.78  | 3.08 | 0.04 |
| E1 | GY   | 5A | AX.89412871 | 5.79E+08 | 0.28 | -2.74  | 3.52 | 0.05 |
| E1 | GY   | 5A | AX.89353357 | 4.75E+08 | 0.05 | -6.87  | 5.04 | 0.08 |
| E1 | GY   | 5A | AX.89762948 | 5.79E+08 | 0.29 | -2.59  | 3.24 | 0.05 |
| E1 | GY   | 5A | AX.89401627 | 5.80E+08 | 0.30 | -2.78  | 3.74 | 0.06 |
| E1 | GY   | 5A | AX.89312208 | 5.79E+08 | 0.28 | -2.74  | 3.52 | 0.05 |
| E1 | GY   | 5A | AX.89674148 | 5.69E+08 | 0.21 | -2.78  | 3.08 | 0.04 |
| E1 | GY   | 5A | AX.89358390 | 5.79E+08 | 0.28 | -2.74  | 3.52 | 0.05 |
| E1 | SPM2 | 5A | AX.89550971 | 4.82E+08 | 0.19 | -22.04 | 3.37 | 0.06 |
| E1 | GY   | 5A | AX.89437997 | 3.69E+08 | 0.09 | -4.47  | 3.70 | 0.07 |
| E1 | SPM2 | 5A | AX.89642695 | 5.13E+08 | 0.27 | 18.09  | 3.03 | 0.05 |
| E1 | GY   | 5A | AX.89355726 | 4.55E+08 | 0.07 | -4.74  | 3.40 | 0.05 |
| E1 | GY   | 5A | AX.89360077 | 5.80E+08 | 0.29 | -2.59  | 3.24 | 0.05 |
| E1 | GY   | 5A | AX.89337095 | 6.81E+08 | 0.14 | -3.57  | 3.55 | 0.05 |
| E1 | GY   | 5A | AX.89348859 | 5.78E+08 | 0.28 | -2.74  | 3.52 | 0.05 |
| E1 | GY   | 5A | AX.89315905 | 5.70E+08 | 0.21 | -2.78  | 3.08 | 0.04 |
| E1 | GY   | 5A | AX.89767302 | 5.78E+08 | 0.29 | -2.59  | 3.24 | 0.05 |
| E1 | GY   | 5A | AX.89338520 | 5.70E+08 | 0.21 | -2.96  | 3.37 | 0.05 |
| E1 | GY   | 5A | AX.89407027 | 5.79E+08 | 0.28 | -2.74  | 3.52 | 0.05 |
| E1 | SPM2 | 5A | AX.89347506 | 1.22E+06 | 0.32 | 18.62  | 3.45 | 0.05 |
| E1 | GY   | 5A | AX.89411073 | 4.55E+08 | 0.09 | -4.89  | 4.50 | 0.07 |
| E1 | GY   | 5A | AX.89492912 | 5.69E+08 | 0.20 | -3.00  | 3.41 | 0.05 |
| E1 | GY   | 5A | AX.89492912 | 5.69E+08 | 0.20 | -3.00  | 3.41 | 0.05 |
| E1 | GY   | 5A | AX.89328890 | 4.55E+08 | 0.09 | -4.89  | 4.50 | 0.07 |
| E1 | GY   | 5A | AX.89356069 | 5.69E+08 | 0.21 | -2.78  | 3.08 | 0.04 |
| E1 | GY   | 5A | AX.89348019 | 5.78E+08 | 0.29 | -2.59  | 3.24 | 0.05 |
| E1 | GY   | 5A | AX.89529755 | 5.69E+08 | 0.21 | -2.78  | 3.08 | 0.04 |
| E1 | GY   | 5A | AX.89412871 | 5.79E+08 | 0.28 | -2.74  | 3.52 | 0.05 |
| E1 | GY   | 5A | AX.89341791 | 5.78E+08 | 0.29 | -2.59  | 3.24 | 0.05 |
| E1 | GY   | 5A | AX.89341791 | 5.78E+08 | 0.29 | -2.59  | 3.24 | 0.05 |
| E1 | GY   | 5A | AX.89401627 | 5.80E+08 | 0.30 | -2.78  | 3.74 | 0.06 |
| E1 | GY   | 5A | AX.89401844 | 6.64E+08 | 0.22 | -2.88  | 3.32 | 0.06 |
| E1 | GY   | 5A | AX.89401844 | 6.64E+08 | 0.22 | -2.88  | 3.32 | 0.06 |
| E1 | GY   | 5A | AX.89378039 | 5.69E+08 | 0.21 | -2.78  | 3.08 | 0.04 |



|    |      |    |             |          |      |        |      |      |
|----|------|----|-------------|----------|------|--------|------|------|
| E1 | GY   | 5A | AX.89378039 | 5.69E+08 | 0.21 | -2.78  | 3.08 | 0.04 |
| E1 | GY   | 5A | AX.86184719 | 4.74E+08 | 0.07 | -6.37  | 5.70 | 0.10 |
| E1 | GY   | 5A | AX.89378499 | 5.70E+08 | 0.21 | -2.78  | 3.08 | 0.04 |
| E1 | GY   | 5A | AX.89557608 | 5.69E+08 | 0.21 | -2.78  | 3.08 | 0.04 |
| E1 | GY   | 5A | AX.89613621 | 5.79E+08 | 0.27 | -2.74  | 3.46 | 0.05 |
| E1 | GY   | 5A | AX.89542560 | 4.73E+08 | 0.08 | -5.83  | 5.40 | 0.09 |
| E1 | GY   | 5A | AX.89367671 | 5.69E+08 | 0.21 | -2.78  | 3.08 | 0.04 |
| E1 | GY   | 5A | AX.89472857 | 5.69E+08 | 0.21 | -2.78  | 3.08 | 0.04 |
| E1 | GY   | 5A | AX.89332916 | 4.73E+08 | 0.08 | -5.83  | 5.40 | 0.09 |
| E1 | GY   | 5A | AX.89712955 | 4.73E+08 | 0.08 | -5.83  | 5.40 | 0.09 |
| E1 | GY   | 5A | AX.89415710 | 4.72E+08 | 0.07 | -5.65  | 4.36 | 0.07 |
| E1 | GY   | 5A | AX.89415710 | 4.72E+08 | 0.07 | -5.65  | 4.36 | 0.07 |
| E1 | GY   | 5A | AX.89436006 | 5.69E+08 | 0.21 | -2.78  | 3.08 | 0.04 |
| E1 | GY   | 5A | AX.89545387 | 5.76E+07 | 0.21 | -2.82  | 3.15 | 0.05 |
| E1 | GY   | 5A | AX.89381438 | 5.70E+08 | 0.20 | -2.86  | 3.10 | 0.05 |
| E1 | GY   | 5A | AX.89628759 | 5.79E+08 | 0.28 | -2.74  | 3.52 | 0.05 |
| E1 | GY   | 5A | AX.89577026 | 5.69E+08 | 0.21 | -2.78  | 3.08 | 0.04 |
| E1 | GY   | 5A | AX.89666351 | 5.79E+08 | 0.28 | -2.74  | 3.52 | 0.05 |
| E1 | GY   | 5A | AX.89418657 | 4.73E+08 | 0.08 | -5.83  | 5.40 | 0.09 |
| E1 | GY   | 5A | AX.89337095 | 6.81E+08 | 0.14 | -3.57  | 3.55 | 0.05 |
| E1 | GY   | 5A | AX.89766154 | 4.79E+08 | 0.33 | 2.68   | 3.65 | 0.07 |
| E1 | GY   | 5A | AX.89396437 | 3.66E+08 | 0.08 | -4.30  | 3.17 | 0.06 |
| E1 | GY   | 5A | AX.89603939 | 3.79E+08 | 0.08 | -4.10  | 3.06 | 0.06 |
| E1 | GY   | 5A | AX.89348859 | 5.78E+08 | 0.28 | -2.74  | 3.52 | 0.05 |
| E1 | GY   | 5A | AX.89373213 | 6.81E+08 | 0.13 | -3.88  | 3.89 | 0.06 |
| E1 | SPM2 | 5A | AX.89463191 | 4.77E+08 | 0.31 | -17.74 | 3.10 | 0.06 |
| E1 | GY   | 5A | AX.89705726 | 5.81E+08 | 0.37 | -2.77  | 4.05 | 0.06 |
| E1 | GY   | 5A | AX.89315905 | 5.70E+08 | 0.21 | -2.78  | 3.08 | 0.04 |
| E1 | GY   | 5A | AX.89560591 | 4.73E+08 | 0.07 | -5.29  | 4.33 | 0.07 |
| E1 | GY   | 5A | AX.89757215 | 6.81E+08 | 0.14 | -3.31  | 3.18 | 0.05 |
| E1 | GY   | 5A | AX.89754412 | 5.65E+08 | 0.14 | -3.78  | 3.91 | 0.06 |
| E1 | GY   | 5A | AX.89358289 | 5.79E+08 | 0.29 | -2.59  | 3.24 | 0.05 |
| E1 | GY   | 5A | AX.89467320 | 5.69E+08 | 0.21 | -2.78  | 3.08 | 0.04 |
| E1 | GY   | 5A | AX.89490823 | 3.68E+08 | 0.09 | -4.47  | 3.70 | 0.07 |
| E1 | GY   | 5A | AX.89739451 | 5.69E+08 | 0.21 | -2.78  | 3.08 | 0.04 |
| E1 | GY   | 5A | AX.89351383 | 5.80E+08 | 0.29 | -2.59  | 3.24 | 0.05 |
| E1 | GY   | 5A | AX.89752925 | 5.70E+08 | 0.21 | -2.78  | 3.08 | 0.04 |
| E1 | GY   | 5A | AX.89550132 | 3.70E+08 | 0.09 | -4.47  | 3.70 | 0.07 |
| E1 | GY   | 5A | AX.89708021 | 5.80E+08 | 0.29 | -2.59  | 3.24 | 0.05 |
| E1 | GY   | 5A | AX.89708021 | 5.80E+08 | 0.29 | -2.59  | 3.24 | 0.05 |
| E1 | GY   | 5A | AX.89671282 | 4.79E+08 | 0.35 | 2.57   | 3.48 | 0.06 |
| E1 | GY   | 5A | AX.89671282 | 4.79E+08 | 0.35 | 2.57   | 3.48 | 0.06 |
| E1 | GY   | 5A | AX.89504966 | 5.80E+08 | 0.29 | -2.59  | 3.24 | 0.05 |
| E1 | GY   | 5A | AX.89513709 | 4.74E+08 | 0.07 | -6.06  | 5.51 | 0.09 |
| E1 | GY   | 5A | AX.89514702 | 5.80E+08 | 0.29 | -2.59  | 3.24 | 0.05 |
| E1 | GY   | 5A | AX.89458875 | 5.69E+08 | 0.21 | -2.78  | 3.08 | 0.04 |
| E1 | GY   | 5A | AX.89458875 | 5.69E+08 | 0.21 | -2.78  | 3.08 | 0.04 |
| E1 | GY   | 5A | AX.89674058 | 5.70E+08 | 0.20 | -3.18  | 3.77 | 0.06 |
| E1 | GY   | 5A | AX.89747446 | 4.79E+08 | 0.35 | 2.57   | 3.48 | 0.06 |
| E1 | GY   | 5A | AX.89609633 | 5.79E+08 | 0.29 | -2.59  | 3.24 | 0.05 |

|    |    |    |             |          |      |       |      |      |
|----|----|----|-------------|----------|------|-------|------|------|
| E1 | GY | 5A | AX.89674761 | 4.74E+08 | 0.07 | -6.37 | 5.70 | 0.10 |
| E1 | GY | 5A | AX.89542560 | 4.73E+08 | 0.08 | -5.83 | 5.40 | 0.09 |
| E1 | GY | 5A | AX.89531737 | 5.78E+08 | 0.29 | -2.59 | 3.24 | 0.05 |
| E1 | GY | 5A | AX.89390857 | 5.78E+08 | 0.29 | -2.59 | 3.24 | 0.05 |
| E1 | GY | 5A | AX.89472857 | 5.69E+08 | 0.21 | -2.78 | 3.08 | 0.04 |
| E1 | GY | 5A | AX.89554603 | 5.70E+08 | 0.21 | -2.78 | 3.08 | 0.04 |
| E1 | GY | 5A | AX.89554603 | 5.70E+08 | 0.21 | -2.78 | 3.08 | 0.04 |
| E1 | GY | 5A | AX.89355726 | 4.55E+08 | 0.07 | -4.74 | 3.40 | 0.05 |
| E1 | GY | 5A | AX.89532286 | 6.81E+08 | 0.13 | -4.20 | 4.34 | 0.07 |
| E1 | GY | 5A | AX.89355896 | 5.70E+08 | 0.21 | -2.78 | 3.08 | 0.04 |
| E1 | GY | 5A | AX.89461065 | 5.79E+08 | 0.29 | -2.59 | 3.24 | 0.05 |
| E1 | GY | 5A | AX.89487661 | 5.79E+08 | 0.29 | -2.59 | 3.24 | 0.05 |
| E1 | GY | 5A | AX.89365633 | 5.79E+08 | 0.28 | -2.55 | 3.12 | 0.04 |
| E1 | GY | 5A | AX.89498567 | 5.69E+08 | 0.21 | -2.78 | 3.08 | 0.04 |
| E1 | GY | 5A | AX.89572674 | 5.78E+08 | 0.29 | -2.59 | 3.24 | 0.05 |
| E1 | GY | 5A | AX.89593694 | 5.69E+08 | 0.21 | -2.82 | 3.11 | 0.05 |
| E1 | GY | 5A | AX.89628759 | 5.79E+08 | 0.28 | -2.74 | 3.52 | 0.05 |
| E1 | GY | 5A | AX.89394142 | 4.72E+08 | 0.07 | -5.65 | 4.36 | 0.07 |
| E1 | GY | 5A | AX.89740114 | 4.72E+08 | 0.07 | -5.65 | 4.36 | 0.07 |
| E1 | GY | 5A | AX.89569902 | 5.69E+08 | 0.21 | -2.78 | 3.08 | 0.04 |
| E1 | GY | 5A | AX.89453604 | 5.69E+08 | 0.21 | -2.78 | 3.08 | 0.04 |
| E1 | GY | 5A | AX.89453604 | 5.69E+08 | 0.21 | -2.78 | 3.08 | 0.04 |
| E1 | GY | 5A | AX.89724824 | 5.69E+08 | 0.21 | -2.78 | 3.08 | 0.04 |
| E1 | GY | 5A | AX.89740805 | 5.95E+08 | 0.33 | -2.62 | 3.49 | 0.06 |
| E1 | GY | 5A | AX.89360516 | 5.78E+08 | 0.29 | -2.59 | 3.24 | 0.05 |
| E1 | GY | 5A | AX.89730190 | 4.55E+08 | 0.09 | -4.89 | 4.50 | 0.07 |
| E1 | GY | 5A | AX.89730190 | 4.55E+08 | 0.09 | -4.89 | 4.50 | 0.07 |
| E1 | GY | 5A | AX.89515116 | 5.80E+08 | 0.28 | -2.74 | 3.52 | 0.05 |
| E1 | GY | 5A | AX.89742725 | 5.70E+08 | 0.21 | -2.78 | 3.08 | 0.04 |
| E1 | GY | 5A | AX.89362731 | 5.69E+08 | 0.21 | -2.78 | 3.08 | 0.04 |
| E1 | GY | 5A | AX.89434232 | 5.79E+08 | 0.28 | -2.74 | 3.52 | 0.05 |
| E1 | GY | 5A | AX.89528830 | 5.79E+08 | 0.28 | -2.74 | 3.52 | 0.05 |
| E1 | GY | 5A | AX.89644722 | 6.81E+08 | 0.13 | -4.20 | 4.34 | 0.07 |
| E1 | GY | 5A | AX.89644722 | 6.81E+08 | 0.13 | -4.20 | 4.34 | 0.07 |
| E1 | GY | 5A | AX.89434678 | 4.73E+08 | 0.08 | -5.83 | 5.40 | 0.09 |
| E1 | GY | 5A | AX.89434678 | 4.73E+08 | 0.08 | -5.83 | 5.40 | 0.09 |
| E1 | GY | 5A | AX.89371970 | 3.68E+08 | 0.09 | -4.47 | 3.70 | 0.07 |
| E1 | GY | 5A | AX.89371970 | 3.68E+08 | 0.09 | -4.47 | 3.70 | 0.07 |
| E1 | GY | 5A | AX.89563193 | 5.70E+08 | 0.20 | -2.86 | 3.10 | 0.05 |
| E1 | GY | 5A | AX.89539733 | 4.75E+08 | 0.05 | -6.87 | 5.04 | 0.08 |
| E1 | GY | 5A | AX.89493604 | 4.79E+08 | 0.35 | 2.57  | 3.48 | 0.06 |
| E1 | GY | 5A | AX.89683745 | 5.80E+08 | 0.28 | -2.74 | 3.52 | 0.05 |
| E1 | GY | 5A | AX.89741034 | 1.87E+07 | 0.18 | -3.25 | 3.56 | 0.05 |
| E1 | GY | 5A | AX.89741034 | 1.87E+07 | 0.18 | -3.25 | 3.56 | 0.05 |
| E1 | GY | 5A | AX.89635430 | 5.70E+08 | 0.21 | -2.78 | 3.08 | 0.04 |
| E1 | GY | 5A | AX.89611595 | 5.69E+08 | 0.21 | -2.78 | 3.08 | 0.04 |
| E1 | GY | 5A | AX.89436006 | 5.69E+08 | 0.21 | -2.78 | 3.08 | 0.04 |
| E1 | GY | 5A | AX.89401228 | 5.79E+08 | 0.28 | -2.95 | 3.99 | 0.06 |
| E1 | GY | 5A | AX.89365450 | 5.79E+08 | 0.29 | -2.59 | 3.24 | 0.05 |
| E1 | GY | 5A | AX.89424196 | 5.65E+08 | 0.13 | -3.93 | 4.08 | 0.06 |

|    |      |    |             |          |      |       |      |      |
|----|------|----|-------------|----------|------|-------|------|------|
| E1 | GY   | 5A | AX.89320286 | 5.70E+08 | 0.21 | -2.78 | 3.08 | 0.04 |
| E1 | SPM2 | 5A | AX.89651413 | 1.61E+06 | 0.15 | 23.06 | 3.18 | 0.06 |
| E1 | GY   | 5A | AX.89519811 | 3.77E+08 | 0.08 | -4.30 | 3.17 | 0.06 |
| E1 | GY   | 5A | AX.89756768 | 5.65E+08 | 0.13 | -3.93 | 4.08 | 0.06 |
| E1 | GY   | 5A | AX.89528643 | 5.80E+08 | 0.29 | -2.59 | 3.24 | 0.05 |
| E1 | GY   | 5A | AX.89472573 | 6.81E+08 | 0.13 | -4.20 | 4.34 | 0.07 |
| E1 | GY   | 5A | AX.89472573 | 6.81E+08 | 0.13 | -4.20 | 4.34 | 0.07 |
| E1 | GY   | 5A | AX.89554532 | 4.56E+08 | 0.08 | -5.00 | 4.12 | 0.07 |
| E1 | GY   | 5A | AX.89356069 | 5.69E+08 | 0.21 | -2.78 | 3.08 | 0.04 |
| E1 | GY   | 5A | AX.89427323 | 5.65E+08 | 0.13 | -3.93 | 4.08 | 0.06 |
| E1 | GY   | 5A | AX.89369030 | 6.88E+07 | 0.23 | -2.99 | 3.67 | 0.06 |
| E1 | GY   | 5A | AX.89762948 | 5.79E+08 | 0.29 | -2.59 | 3.24 | 0.05 |
| E1 | GY   | 5A | AX.89370346 | 5.40E+08 | 0.16 | -3.04 | 3.00 | 0.04 |
| E1 | GY   | 5A | AX.89739451 | 5.69E+08 | 0.21 | -2.78 | 3.08 | 0.04 |
| E1 | GY   | 5A | AX.89417785 | 5.79E+08 | 0.28 | -2.74 | 3.52 | 0.05 |
| E1 | GY   | 5A | AX.89407027 | 5.79E+08 | 0.28 | -2.74 | 3.52 | 0.05 |
| E1 | GY   | 5A | AX.89691016 | 5.69E+08 | 0.21 | -2.78 | 3.08 | 0.04 |
| E1 | GY   | 5A | AX.89691016 | 5.69E+08 | 0.21 | -2.78 | 3.08 | 0.04 |
| E1 | GY   | 5A | AX.89569902 | 5.69E+08 | 0.21 | -2.78 | 3.08 | 0.04 |
| E1 | GPS  | 5A | AX.89664012 | 5.88E+08 | 0.12 | 1.73  | 3.03 | 0.05 |
| E1 | GY   | 5A | AX.89693326 | 4.55E+08 | 0.09 | -4.89 | 4.50 | 0.07 |
| E1 | GY   | 5A | AX.89570035 | 5.79E+08 | 0.24 | -2.80 | 3.31 | 0.05 |
| E1 | GY   | 5A | AX.89570035 | 5.79E+08 | 0.24 | -2.80 | 3.31 | 0.05 |
| E1 | GY   | 5A | AX.89741852 | 5.79E+08 | 0.29 | -2.59 | 3.24 | 0.05 |
| E1 | GY   | 5A | AX.89766534 | 4.72E+08 | 0.09 | -3.98 | 3.03 | 0.05 |
| E1 | GY   | 5A | AX.89766534 | 4.72E+08 | 0.09 | -3.98 | 3.03 | 0.05 |
| E1 | GPS  | 5A | AX.89577447 | 5.81E+08 | 0.36 | -1.15 | 3.00 | 0.05 |
| E1 | GY   | 5A | AX.89705726 | 5.81E+08 | 0.37 | -2.77 | 4.05 | 0.06 |
| E1 | GPS  | 5A | AX.89446700 | 5.88E+08 | 0.12 | 1.73  | 3.03 | 0.05 |
| E1 | SPM2 | 5A | AX.89536548 | 1.22E+06 | 0.31 | 18.46 | 3.33 | 0.05 |
| E1 | GY   | 5A | AX.89730271 | 5.78E+08 | 0.29 | -2.59 | 3.24 | 0.05 |
| E1 | GY   | 5A | AX.89730271 | 5.78E+08 | 0.29 | -2.59 | 3.24 | 0.05 |
| E1 | GY   | 5A | AX.89397135 | 6.81E+08 | 0.14 | -3.31 | 3.18 | 0.05 |
| E1 | GY   | 5A | AX.89515116 | 5.80E+08 | 0.28 | -2.74 | 3.52 | 0.05 |
| E1 | GY   | 5A | AX.89361677 | 4.74E+08 | 0.07 | -6.06 | 5.51 | 0.09 |
| E1 | GY   | 5A | AX.89757215 | 6.81E+08 | 0.14 | -3.31 | 3.18 | 0.05 |
| E1 | GY   | 5A | AX.89361971 | 4.73E+08 | 0.07 | -6.10 | 5.57 | 0.09 |
| E1 | GY   | 5A | AX.89706227 | 5.78E+08 | 0.29 | -2.59 | 3.24 | 0.05 |
| E1 | GY   | 5A | AX.89706227 | 5.78E+08 | 0.29 | -2.59 | 3.24 | 0.05 |
| E1 | GY   | 5A | AX.89754412 | 5.65E+08 | 0.14 | -3.78 | 3.91 | 0.06 |
| E1 | GY   | 5A | AX.89767302 | 5.78E+08 | 0.29 | -2.59 | 3.24 | 0.05 |
| E1 | GY   | 5A | AX.89514415 | 5.69E+08 | 0.21 | -2.78 | 3.08 | 0.04 |
| E1 | GPS  | 5A | AX.89538290 | 5.87E+08 | 0.12 | 1.73  | 3.03 | 0.05 |
| E1 | GY   | 5A | AX.89621569 | 4.55E+08 | 0.09 | -4.89 | 4.50 | 0.07 |
| E1 | GPS  | 5A | AX.89624050 | 5.86E+08 | 0.10 | 1.85  | 3.06 | 0.05 |
| E1 | GY   | 5A | AX.89610177 | 6.64E+08 | 0.22 | -2.88 | 3.32 | 0.06 |
| E1 | GPS  | 5A | AX.89554649 | 5.88E+08 | 0.12 | 1.73  | 3.03 | 0.05 |
| E1 | GY   | 5A | AX.89744768 | 5.80E+08 | 0.29 | -2.59 | 3.24 | 0.05 |
| E1 | GPS  | 5A | AX.89498504 | 5.88E+08 | 0.12 | 1.73  | 3.03 | 0.05 |
| E1 | GY   | 5A | AX.89586923 | 5.69E+08 | 0.21 | -2.78 | 3.08 | 0.04 |

|    |     |    |             |          |      |       |      |      |
|----|-----|----|-------------|----------|------|-------|------|------|
| E1 | GY  | 5A | AX.89469235 | 5.78E+08 | 0.29 | -2.59 | 3.24 | 0.05 |
| E1 | GY  | 5A | AX.89469235 | 5.78E+08 | 0.29 | -2.59 | 3.24 | 0.05 |
| E1 | GY  | 5A | AX.89635430 | 5.70E+08 | 0.21 | -2.78 | 3.08 | 0.04 |
| E1 | GY  | 5A | AX.89627247 | 4.74E+08 | 0.07 | -6.06 | 5.51 | 0.09 |
| E1 | GY  | 5A | AX.89627247 | 4.74E+08 | 0.07 | -6.06 | 5.51 | 0.09 |
| E1 | GPS | 5A | AX.89514885 | 5.86E+08 | 0.13 | 1.67  | 3.01 | 0.05 |
| E1 | GY  | 5A | AX.89626211 | 4.79E+08 | 0.35 | 2.57  | 3.48 | 0.06 |
| E1 | GPS | 5A | AX.89378909 | 5.87E+08 | 0.12 | 1.73  | 3.03 | 0.05 |
| E1 | GY  | 5A | AX.89470458 | 6.81E+08 | 0.14 | -3.31 | 3.18 | 0.05 |
| E1 | GPS | 5A | AX.89676472 | 5.87E+08 | 0.12 | 1.73  | 3.03 | 0.05 |
| E1 | GPS | 5A | AX.89588397 | 5.87E+08 | 0.10 | 1.86  | 3.09 | 0.05 |
| E1 | GY  | 5A | AX.89378499 | 5.70E+08 | 0.21 | -2.78 | 3.08 | 0.04 |
| E1 | GY  | 5A | AX.89632555 | 5.70E+08 | 0.21 | -2.78 | 3.08 | 0.04 |
| E1 | GY  | 5A | AX.89519811 | 3.77E+08 | 0.08 | -4.30 | 3.17 | 0.06 |
| E1 | GPS | 5A | AX.89481347 | 5.87E+08 | 0.12 | 1.73  | 3.03 | 0.05 |
| E1 | GPS | 5A | AX.89685111 | 5.87E+08 | 0.12 | 1.73  | 3.03 | 0.05 |
| E1 | GPS | 5A | AX.89360530 | 5.75E+08 | 0.10 | 1.85  | 3.07 | 0.05 |
| E1 | GPS | 5A | AX.89754412 | 5.65E+08 | 0.14 | -1.71 | 3.39 | 0.06 |
| E1 | GY  | 5A | AX.89427323 | 5.65E+08 | 0.13 | -3.93 | 4.08 | 0.06 |
| E1 | GPS | 5A | AX.89603589 | 5.87E+08 | 0.12 | 1.73  | 3.03 | 0.05 |
| E1 | GY  | 5A | AX.89751422 | 6.64E+08 | 0.22 | -2.88 | 3.32 | 0.06 |
| E1 | GY  | 5A | AX.89751422 | 6.64E+08 | 0.22 | -2.88 | 3.32 | 0.06 |
| E1 | GY  | 5A | AX.89665160 | 5.48E+08 | 0.08 | -4.54 | 3.49 | 0.07 |
| E1 | GY  | 5A | AX.89312208 | 5.79E+08 | 0.28 | -2.74 | 3.52 | 0.05 |
| E1 | GPS | 5A | AX.89427323 | 5.65E+08 | 0.13 | -1.79 | 3.57 | 0.06 |
| E1 | GY  | 5A | AX.89776327 | 5.78E+08 | 0.29 | -2.59 | 3.24 | 0.05 |
| E1 | GY  | 5A | AX.89572674 | 5.78E+08 | 0.29 | -2.59 | 3.24 | 0.05 |
| E1 | GY  | 5A | AX.89674171 | 5.79E+08 | 0.28 | -2.77 | 3.57 | 0.05 |
| E1 | GY  | 5A | AX.89546156 | 4.75E+08 | 0.05 | -6.87 | 5.04 | 0.08 |
| E1 | GY  | 5A | AX.89546156 | 4.75E+08 | 0.05 | -6.87 | 5.04 | 0.08 |
| E1 | GY  | 5A | AX.89476132 | 4.73E+08 | 0.08 | -5.83 | 5.40 | 0.09 |
| E1 | GY  | 5A | AX.89476132 | 4.73E+08 | 0.08 | -5.83 | 5.40 | 0.09 |
| E1 | GY  | 5A | AX.89740114 | 4.72E+08 | 0.07 | -5.65 | 4.36 | 0.07 |
| E1 | GY  | 5A | AX.89347579 | 4.79E+08 | 0.35 | 2.57  | 3.48 | 0.06 |
| E1 | GY  | 5A | AX.89347579 | 4.79E+08 | 0.35 | 2.57  | 3.48 | 0.06 |
| E1 | GY  | 5A | AX.89347781 | 5.70E+08 | 0.20 | -2.86 | 3.10 | 0.05 |
| E1 | GY  | 5A | AX.89693874 | 5.74E+08 | 0.25 | -2.88 | 3.57 | 0.05 |
| E1 | GY  | 5A | AX.89693874 | 5.74E+08 | 0.25 | -2.88 | 3.57 | 0.05 |
| E1 | GY  | 5A | AX.89740805 | 5.95E+08 | 0.33 | -2.62 | 3.49 | 0.06 |
| E1 | GY  | 5A | AX.89650222 | 4.74E+08 | 0.06 | -6.62 | 5.43 | 0.09 |
| E1 | GY  | 5A | AX.89766154 | 4.79E+08 | 0.33 | 2.68  | 3.65 | 0.07 |
| E1 | GY  | 5A | AX.89603939 | 3.79E+08 | 0.08 | -4.10 | 3.06 | 0.06 |
| E1 | GY  | 5A | AX.89611730 | 5.80E+08 | 0.29 | -2.59 | 3.24 | 0.05 |
| E1 | GY  | 5A | AX.89776633 | 5.78E+08 | 0.29 | -2.59 | 3.24 | 0.05 |
| E1 | GPS | 5A | AX.89681948 | 5.89E+08 | 0.10 | 1.85  | 3.06 | 0.05 |
| E1 | GY  | 5A | AX.89561103 | 4.75E+08 | 0.06 | -5.85 | 4.09 | 0.07 |
| E1 | GY  | 5A | AX.89561103 | 4.75E+08 | 0.06 | -5.85 | 4.09 | 0.07 |
| E1 | GY  | 5A | AX.89556661 | 6.64E+08 | 0.22 | -2.88 | 3.32 | 0.06 |
| E1 | GY  | 5A | AX.89694942 | 3.68E+08 | 0.08 | -4.30 | 3.17 | 0.06 |
| E1 | GPS | 5A | AX.89512067 | 5.85E+08 | 0.10 | 1.87  | 3.02 | 0.05 |

|    |      |    |             |          |      |          |      |      |
|----|------|----|-------------|----------|------|----------|------|------|
| E1 | GY   | 5A | AX.89744074 | 5.81E+08 | 0.37 | -2.77    | 4.04 | 0.06 |
| E1 | GY   | 5A | AX.89744074 | 5.81E+08 | 0.37 | -2.77    | 4.04 | 0.06 |
| E1 | GY   | 5A | AX.89621656 | 4.73E+08 | 0.08 | -5.83    | 5.40 | 0.09 |
| E1 | GY   | 5A | AX.89513709 | 4.74E+08 | 0.07 | -6.06    | 5.51 | 0.09 |
| E1 | GY   | 5A | AX.89774371 | 4.74E+08 | 0.07 | -6.06    | 5.51 | 0.09 |
| E1 | GY   | 5A | AX.89647546 | 5.79E+08 | 0.29 | -2.59    | 3.24 | 0.05 |
| E1 | GY   | 5A | AX.89353357 | 4.75E+08 | 0.05 | -6.87    | 5.04 | 0.08 |
| E1 | GY   | 5A | AX.89514702 | 5.80E+08 | 0.29 | -2.59    | 3.24 | 0.05 |
| E1 | GY   | 5A | AX.89689921 | 5.69E+08 | 0.21 | -2.78    | 3.08 | 0.04 |
| E1 | GY   | 5A | AX.89689921 | 5.69E+08 | 0.21 | -2.78    | 3.08 | 0.04 |
| E1 | GY   | 5A | AX.89747446 | 4.79E+08 | 0.35 | 2.57     | 3.48 | 0.06 |
| E1 | GY   | 5A | AX.89609633 | 5.79E+08 | 0.29 | -2.59    | 3.24 | 0.05 |
| E1 | GY   | 5A | AX.89577447 | 5.81E+08 | 0.36 | -2.86    | 4.22 | 0.06 |
| E1 | GY   | 5A | AX.89531737 | 5.78E+08 | 0.29 | -2.59    | 3.24 | 0.05 |
| E1 | GY   | 5A | AX.89367671 | 5.69E+08 | 0.21 | -2.78    | 3.08 | 0.04 |
| E1 | GY   | 5A | AX.89773817 | 5.80E+08 | 0.28 | -2.74    | 3.52 | 0.05 |
| E1 | GY   | 5A | AX.89773817 | 5.80E+08 | 0.28 | -2.74    | 3.52 | 0.05 |
| E1 | GY   | 5A | AX.89566490 | 4.73E+08 | 0.07 | -6.10    | 5.57 | 0.09 |
| E1 | GY   | 5A | AX.89566490 | 4.73E+08 | 0.07 | -6.10    | 5.57 | 0.09 |
| E1 | GY   | 5A | AX.89712955 | 4.73E+08 | 0.08 | -5.83    | 5.40 | 0.09 |
| E1 | GY   | 5A | AX.89355896 | 5.70E+08 | 0.21 | -2.78    | 3.08 | 0.04 |
| E1 | GY   | 5A | AX.89461065 | 5.79E+08 | 0.29 | -2.59    | 3.24 | 0.05 |
| E1 | GY   | 5A | AX.89555729 | 5.78E+08 | 0.29 | -2.59    | 3.24 | 0.05 |
| E1 | GY   | 5A | AX.89665160 | 5.48E+08 | 0.08 | -4.54    | 3.49 | 0.07 |
| E1 | GY   | 5A | AX.89365633 | 5.79E+08 | 0.28 | -2.55    | 3.12 | 0.04 |
| E1 | GPS  | 5A | AX.89318562 | 5.86E+08 | 0.12 | 1.73     | 3.03 | 0.05 |
| E1 | GY   | 5A | AX.89545387 | 5.76E+07 | 0.21 | -2.82    | 3.15 | 0.05 |
| E1 | GY   | 5A | AX.89358289 | 5.79E+08 | 0.29 | -2.59    | 3.24 | 0.05 |
| E1 | GY   | 5A | AX.89417785 | 5.79E+08 | 0.28 | -2.74    | 3.52 | 0.05 |
| E1 | GY   | 5A | AX.89500280 | 6.81E+08 | 0.13 | -4.20    | 4.34 | 0.07 |
| E1 | GY   | 5A | AX.89360077 | 5.80E+08 | 0.29 | -2.59    | 3.24 | 0.05 |
| E1 | GY   | 5A | AX.89521854 | 6.81E+08 | 0.13 | -4.20    | 4.34 | 0.07 |
| E1 | GY   | 5A | AX.89360516 | 5.78E+08 | 0.29 | -2.59    | 3.24 | 0.05 |
| E1 | GY   | 5A | AX.89776633 | 5.78E+08 | 0.29 | -2.59    | 3.24 | 0.05 |
| E1 | GY   | 5A | AX.89361677 | 4.74E+08 | 0.07 | -6.06    | 5.51 | 0.09 |
| E1 | GY   | 5A | AX.89742725 | 5.70E+08 | 0.21 | -2.78    | 3.08 | 0.04 |
| E1 | GY   | 5A | AX.89361971 | 4.73E+08 | 0.07 | -6.10    | 5.57 | 0.09 |
| E1 | GY   | 5A | AX.89467320 | 5.69E+08 | 0.21 | -2.78    | 3.08 | 0.04 |
| E1 | GY   | 5A | AX.89362731 | 5.69E+08 | 0.21 | -2.78    | 3.08 | 0.04 |
| E1 | GY   | 5A | AX.89682075 | 4.76E+08 | 0.05 | -6.87    | 5.04 | 0.08 |
| E1 | GY   | 5A | AX.89755013 | 4.72E+08 | 0.07 | -5.65    | 4.36 | 0.07 |
| E1 | GY   | 5A | AX.89610177 | 6.64E+08 | 0.22 | -2.88    | 3.32 | 0.06 |
| E1 | GY   | 5A | AX.89504966 | 5.80E+08 | 0.29 | -2.59    | 3.24 | 0.05 |
| E1 | GY   | 5A | AX.89700666 | 5.70E+08 | 0.21 | -2.78    | 3.08 | 0.04 |
| E1 | GY   | 5A | AX.89683745 | 5.80E+08 | 0.28 | -2.74    | 3.52 | 0.05 |
| E1 | GPM2 | 5A | AX.89363354 | 4.45E+08 | 0.09 | -1005.28 | 3.10 | 0.05 |
| E1 | GPM2 | 5A | AX.89407707 | 5.74E+08 | 0.31 | 658.52   | 3.31 | 0.04 |
| E1 | GPM2 | 5A | AX.89776590 | 5.78E+08 | 0.29 | -695.74  | 3.53 | 0.05 |
| E1 | GPM2 | 5A | AX.89341262 | 5.81E+08 | 0.26 | 891.63   | 5.10 | 0.08 |
| E1 | GPM2 | 5A | AX.89355633 | 5.74E+08 | 0.30 | 737.46   | 3.97 | 0.06 |

|    |      |    |             |          |      |          |      |      |
|----|------|----|-------------|----------|------|----------|------|------|
| E1 | GPM2 | 5A | AX.89703618 | 4.55E+08 | 0.06 | -1324.30 | 3.32 | 0.05 |
| E1 | GPM2 | 5A | AX.89612205 | 3.93E+08 | 0.17 | -780.65  | 3.09 | 0.05 |
| E1 | GPM2 | 5A | AX.89709901 | 3.92E+08 | 0.18 | -864.36  | 3.81 | 0.07 |
| E1 | GPM2 | 5A | AX.89365633 | 5.79E+08 | 0.28 | -742.30  | 3.91 | 0.06 |
| E1 | GPM2 | 5A | AX.89434678 | 4.73E+08 | 0.08 | -1266.73 | 4.06 | 0.07 |
| E1 | GPM2 | 5A | AX.89447750 | 5.74E+08 | 0.30 | 737.46   | 3.97 | 0.06 |
| E1 | GPM2 | 5A | AX.89463676 | 5.81E+08 | 0.34 | -727.57  | 4.12 | 0.06 |
| E1 | GPM2 | 5A | AX.89706227 | 5.78E+08 | 0.29 | -695.74  | 3.53 | 0.05 |
| E1 | GY   | 5A | AX.89613013 | 4.73E+08 | 0.08 | -6.05    | 5.77 | 0.10 |
| E1 | GPM2 | 5A | AX.89361677 | 4.74E+08 | 0.07 | -1480.77 | 5.09 | 0.09 |
| E1 | GY   | 5A | AX.89332217 | 5.70E+08 | 0.20 | -3.18    | 3.77 | 0.06 |
| E1 | GY   | 5A | AX.89437997 | 3.69E+08 | 0.09 | -4.47    | 3.70 | 0.07 |
| E1 | GPM2 | 5A | AX.89776327 | 5.78E+08 | 0.29 | -695.74  | 3.53 | 0.05 |
| E1 | GY   | 5A | AX.89756768 | 5.65E+08 | 0.13 | -3.93    | 4.08 | 0.06 |
| E1 | GY   | 5A | AX.89528643 | 5.80E+08 | 0.29 | -2.59    | 3.24 | 0.05 |
| E1 | GPM2 | 5A | AX.89634384 | 4.45E+08 | 0.09 | -1005.28 | 3.10 | 0.05 |
| E1 | GPM2 | 5A | AX.89630592 | 4.73E+08 | 0.08 | -1266.73 | 4.06 | 0.07 |
| E1 | GY   | 5A | AX.89369030 | 6.88E+07 | 0.23 | -2.99    | 3.67 | 0.06 |
| E1 | GPM2 | 5A | AX.89602954 | 5.82E+08 | 0.34 | -727.57  | 4.12 | 0.06 |
| E1 | SPM2 | 5A | AX.89462512 | 1.22E+06 | 0.32 | 18.62    | 3.45 | 0.05 |
| E1 | GPM2 | 5A | AX.89560591 | 4.73E+08 | 0.07 | -1160.25 | 3.33 | 0.05 |
| E1 | GPM2 | 5A | AX.89459385 | 5.79E+08 | 0.28 | -702.14  | 3.55 | 0.05 |
| E1 | GPM2 | 5A | AX.89361971 | 4.73E+08 | 0.07 | -1319.55 | 4.15 | 0.07 |
| E1 | GPM2 | 5A | AX.89438235 | 3.92E+08 | 0.18 | -864.36  | 3.81 | 0.07 |
| E1 | GPM2 | 5A | AX.89322245 | 3.92E+08 | 0.17 | -780.65  | 3.09 | 0.05 |
| E1 | GY   | 5A | AX.89370346 | 5.40E+08 | 0.16 | -3.04    | 3.00 | 0.04 |
| E1 | GPM2 | 5A | AX.89365450 | 5.79E+08 | 0.29 | -695.74  | 3.53 | 0.05 |
| E1 | GY   | 5A | AX.89776590 | 5.78E+08 | 0.29 | -2.59    | 3.24 | 0.05 |
| E1 | GPM2 | 5A | AX.89683745 | 5.80E+08 | 0.28 | -737.77  | 3.87 | 0.06 |
| E1 | GPM2 | 5A | AX.89317782 | 3.92E+08 | 0.18 | -864.36  | 3.81 | 0.07 |
| E1 | GPM2 | 5A | AX.89401228 | 5.79E+08 | 0.28 | -767.01  | 4.11 | 0.06 |
| E1 | GPM2 | 5A | AX.89353357 | 4.75E+08 | 0.05 | -1626.14 | 4.41 | 0.07 |
| E1 | GPM2 | 5A | AX.89627247 | 4.74E+08 | 0.07 | -1480.77 | 5.09 | 0.09 |
| E1 | GPM2 | 5A | AX.89571890 | 5.81E+08 | 0.34 | -727.57  | 4.12 | 0.06 |
| E1 | GPM2 | 5A | AX.89536487 | 3.92E+08 | 0.18 | -864.36  | 3.81 | 0.07 |
| E1 | GPM2 | 5A | AX.89750176 | 3.92E+08 | 0.18 | -794.46  | 3.36 | 0.06 |
| E1 | GPM2 | 5A | AX.89393436 | 5.91E+08 | 0.28 | 648.13   | 3.10 | 0.05 |
| E1 | GPM2 | 5A | AX.89743768 | 5.55E+08 | 0.27 | -682.98  | 3.27 | 0.05 |
| E1 | GPM2 | 5A | AX.89621569 | 4.55E+08 | 0.09 | -1245.18 | 4.48 | 0.07 |
| E1 | GPM2 | 5A | AX.89461701 | 5.79E+08 | 0.28 | -737.77  | 3.87 | 0.06 |
| E1 | GPM2 | 5A | AX.89756768 | 5.65E+08 | 0.13 | -872.04  | 3.20 | 0.05 |
| E1 | GPM2 | 5A | AX.89744481 | 3.92E+08 | 0.18 | -864.36  | 3.81 | 0.07 |
| E1 | GPM2 | 5A | AX.89646475 | 3.93E+08 | 0.17 | -780.65  | 3.09 | 0.05 |
| E1 | GY   | 5A | AX.89630592 | 4.73E+08 | 0.08 | -5.83    | 5.40 | 0.09 |
| E1 | GY   | 5A | AX.89630592 | 4.73E+08 | 0.08 | -5.83    | 5.40 | 0.09 |
| E1 | GPM2 | 5A | AX.89737612 | 5.81E+08 | 0.33 | -771.62  | 4.51 | 0.07 |
| E1 | GPM2 | 5A | AX.89348859 | 5.78E+08 | 0.28 | -737.77  | 3.87 | 0.06 |
| E1 | GPM2 | 5A | AX.89759673 | 5.78E+08 | 0.30 | -633.40  | 3.08 | 0.05 |
| E1 | GY   | 5A | AX.89693326 | 4.55E+08 | 0.09 | -4.89    | 4.50 | 0.07 |
| E1 | GPM2 | 5A | AX.89680671 | 3.92E+08 | 0.17 | -780.65  | 3.09 | 0.05 |

|    |      |    |             |          |      |          |      |      |
|----|------|----|-------------|----------|------|----------|------|------|
| E1 | GPM2 | 5A | AX.89428853 | 3.92E+08 | 0.18 | -864.36  | 3.81 | 0.07 |
| E1 | GPM2 | 5A | AX.89665160 | 5.48E+08 | 0.08 | -1301.34 | 4.26 | 0.08 |
| E1 | GY   | 5A | AX.89741852 | 5.79E+08 | 0.29 | -2.59    | 3.24 | 0.05 |
| E1 | GPM2 | 5A | AX.89618816 | 3.92E+08 | 0.17 | -780.65  | 3.09 | 0.05 |
| E1 | GPM2 | 5A | AX.89413528 | 5.81E+08 | 0.33 | -771.62  | 4.51 | 0.07 |
| E1 | GPM2 | 5A | AX.89545492 | 5.78E+08 | 0.29 | -695.74  | 3.53 | 0.05 |
| E1 | GY   | 5A | AX.89397135 | 6.81E+08 | 0.14 | -3.31    | 3.18 | 0.05 |
| E1 | GPM2 | 5A | AX.89504966 | 5.80E+08 | 0.29 | -695.74  | 3.53 | 0.05 |
| E1 | GPM2 | 5A | AX.89468147 | 5.80E+08 | 0.28 | -737.77  | 3.87 | 0.06 |
| E1 | GPM2 | 5A | AX.89621454 | 3.92E+08 | 0.18 | -864.36  | 3.81 | 0.07 |
| E1 | GY   | 5A | AX.89514415 | 5.69E+08 | 0.21 | -2.78    | 3.08 | 0.04 |
| E1 | GPM2 | 5A | AX.89635131 | 3.92E+08 | 0.17 | -780.65  | 3.09 | 0.05 |
| E1 | GPM2 | 5A | AX.89611730 | 5.80E+08 | 0.29 | -695.74  | 3.53 | 0.05 |
| E1 | GPM2 | 5A | AX.89579126 | 4.45E+08 | 0.09 | -1005.28 | 3.10 | 0.05 |
| E1 | GY   | 5A | AX.89411073 | 4.55E+08 | 0.09 | -4.89    | 4.50 | 0.07 |
| E1 | GY   | 5A | AX.89621569 | 4.55E+08 | 0.09 | -4.89    | 4.50 | 0.07 |
| E1 | GPM2 | 5A | AX.89495470 | 3.93E+08 | 0.17 | -783.00  | 3.16 | 0.05 |
| E1 | GY   | 5A | AX.89339851 | 5.70E+08 | 0.21 | -2.78    | 3.08 | 0.04 |
| E1 | GY   | 5A | AX.89621656 | 4.73E+08 | 0.08 | -5.83    | 5.40 | 0.09 |
| E1 | GPM2 | 5A | AX.89453765 | 3.92E+08 | 0.17 | -780.65  | 3.09 | 0.05 |
| E1 | GPM2 | 5A | AX.89628759 | 5.79E+08 | 0.28 | -737.77  | 3.87 | 0.06 |
| E1 | GPM2 | 5A | AX.89637689 | 5.81E+08 | 0.34 | -727.57  | 4.12 | 0.06 |
| E1 | GPS  | 5A | AX.89629472 | 5.87E+08 | 0.12 | 1.73     | 3.03 | 0.05 |
| E1 | GPM2 | 5A | AX.89419288 | 5.80E+08 | 0.31 | -647.65  | 3.22 | 0.05 |
| E1 | GPM2 | 5A | AX.89340573 | 3.92E+08 | 0.18 | -864.36  | 3.81 | 0.07 |
| E1 | GY   | 5A | AX.89586923 | 5.69E+08 | 0.21 | -2.78    | 3.08 | 0.04 |
| E1 | GPS  | 5A | AX.89322114 | 4.79E+08 | 0.13 | -1.72    | 3.33 | 0.06 |
| E1 | GPM2 | 5A | AX.89358289 | 5.79E+08 | 0.29 | -695.74  | 3.53 | 0.05 |
| E1 | GPS  | 5A | AX.89424196 | 5.65E+08 | 0.13 | -1.79    | 3.57 | 0.06 |
| E1 | GPM2 | 5A | AX.89328890 | 4.55E+08 | 0.09 | -1245.18 | 4.48 | 0.07 |
| E1 | GPM2 | 5A | AX.89776633 | 5.78E+08 | 0.29 | -695.74  | 3.53 | 0.05 |
| E1 | GPM2 | 5A | AX.89360077 | 5.80E+08 | 0.29 | -695.74  | 3.53 | 0.05 |
| E1 | GPM2 | 5A | AX.89382886 | 4.45E+08 | 0.09 | -1005.28 | 3.10 | 0.05 |
| E1 | GPM2 | 5A | AX.89461065 | 5.79E+08 | 0.29 | -695.74  | 3.53 | 0.05 |
| E1 | GPM2 | 5A | AX.89432062 | 4.83E+08 | 0.31 | -654.67  | 3.30 | 0.05 |
| E1 | GY   | 5A | AX.89632555 | 5.70E+08 | 0.21 | -2.78    | 3.08 | 0.04 |
| E1 | GY   | 5A | AX.89733452 | 5.78E+08 | 0.29 | -2.59    | 3.24 | 0.05 |
| E1 | GY   | 5A | AX.89733452 | 5.78E+08 | 0.29 | -2.59    | 3.24 | 0.05 |
| E1 | GPM2 | 5A | AX.89454851 | 5.91E+08 | 0.28 | 648.13   | 3.10 | 0.05 |
| E1 | GPM2 | 5A | AX.89572674 | 5.78E+08 | 0.29 | -695.74  | 3.53 | 0.05 |
| E1 | GPM2 | 5A | AX.89341791 | 5.78E+08 | 0.29 | -695.74  | 3.53 | 0.05 |
| E1 | GPM2 | 5A | AX.89550400 | 4.45E+08 | 0.09 | -1005.28 | 3.10 | 0.05 |
| E1 | GPM2 | 5A | AX.89551301 | 5.81E+08 | 0.34 | -727.57  | 4.12 | 0.06 |
| E1 | GPM2 | 5A | AX.89490699 | 3.92E+08 | 0.18 | -864.36  | 3.81 | 0.07 |
| E1 | GPM2 | 5A | AX.89615359 | 3.92E+08 | 0.18 | -864.36  | 3.81 | 0.07 |
| E1 | GPM2 | 5A | AX.89412871 | 5.79E+08 | 0.28 | -737.77  | 3.87 | 0.06 |
| E1 | GPM2 | 5A | AX.89577998 | 4.45E+08 | 0.09 | -1005.28 | 3.10 | 0.05 |
| E1 | GPM2 | 5A | AX.89730271 | 5.78E+08 | 0.29 | -695.74  | 3.53 | 0.05 |
| E1 | GPS  | 5A | AX.89446653 | 5.87E+08 | 0.12 | 1.73     | 3.03 | 0.05 |
| E1 | GPM2 | 5A | AX.89545444 | 5.82E+08 | 0.34 | -727.57  | 4.12 | 0.06 |

|    |      |    |             |          |      |          |      |      |
|----|------|----|-------------|----------|------|----------|------|------|
| E1 | GPM2 | 5A | AX.89358390 | 5.79E+08 | 0.28 | -737.77  | 3.87 | 0.06 |
| E1 | GPS  | 5A | AX.89751484 | 5.86E+08 | 0.14 | 1.73     | 3.52 | 0.06 |
| E1 | GPS  | 5A | AX.89485888 | 5.87E+08 | 0.12 | 1.73     | 3.03 | 0.05 |
| E1 | GY   | 5A | AX.89776327 | 5.78E+08 | 0.29 | -2.59    | 3.24 | 0.05 |
| E1 | GPM2 | 5A | AX.89714035 | 3.93E+08 | 0.17 | -780.65  | 3.09 | 0.05 |
| E1 | GPM2 | 5A | AX.89555729 | 5.78E+08 | 0.29 | -695.74  | 3.53 | 0.05 |
| E1 | GY   | 5A | AX.89557608 | 5.69E+08 | 0.21 | -2.78    | 3.08 | 0.04 |
| E1 | GPS  | 5A | AX.89510976 | 5.88E+08 | 0.12 | 1.73     | 3.03 | 0.05 |
| E1 | GPM2 | 5A | AX.89620526 | 5.78E+08 | 0.29 | -695.74  | 3.53 | 0.05 |
| E1 | GPM2 | 5A | AX.89644722 | 6.81E+08 | 0.13 | -881.44  | 3.10 | 0.05 |
| E1 | GPM2 | 5A | AX.89385525 | 3.92E+08 | 0.17 | -780.65  | 3.09 | 0.05 |
| E1 | GPM2 | 5A | AX.89714222 | 3.93E+08 | 0.17 | -780.65  | 3.09 | 0.05 |
| E1 | GPS  | 5A | AX.89317837 | 5.87E+08 | 0.12 | 1.73     | 3.03 | 0.05 |
| E1 | GY   | 5A | AX.89545492 | 5.78E+08 | 0.29 | -2.59    | 3.24 | 0.05 |
| E1 | GY   | 5A | AX.89724824 | 5.69E+08 | 0.21 | -2.78    | 3.08 | 0.04 |
| E1 | GY   | 5A | AX.89521854 | 6.81E+08 | 0.13 | -4.20    | 4.34 | 0.07 |
| E1 | GPM2 | 5A | AX.89355726 | 4.55E+08 | 0.07 | -1413.22 | 4.45 | 0.07 |
| E1 | GPM2 | 5A | AX.89566490 | 4.73E+08 | 0.07 | -1319.55 | 4.15 | 0.07 |
| E1 | GY   | 5A | AX.89650222 | 4.74E+08 | 0.06 | -6.62    | 5.43 | 0.09 |
| E1 | GPM2 | 5A | AX.89351383 | 5.80E+08 | 0.29 | -695.74  | 3.53 | 0.05 |
| E1 | GPM2 | 5A | AX.89570035 | 5.79E+08 | 0.24 | -716.96  | 3.33 | 0.05 |
| E1 | GY   | 5A | AX.89611730 | 5.80E+08 | 0.29 | -2.59    | 3.24 | 0.05 |
| E1 | GY   | 5A | AX.89635689 | 5.79E+08 | 0.28 | -2.74    | 3.52 | 0.05 |
| E1 | GY   | 5A | AX.89635689 | 5.79E+08 | 0.28 | -2.74    | 3.52 | 0.05 |
| E1 | GPM2 | 5A | AX.89674171 | 5.79E+08 | 0.28 | -688.45  | 3.41 | 0.05 |
| E1 | GPM2 | 5A | AX.89609633 | 5.79E+08 | 0.29 | -695.74  | 3.53 | 0.05 |
| E1 | GPM2 | 5A | AX.89666351 | 5.79E+08 | 0.28 | -737.77  | 3.87 | 0.06 |
| E1 | GPM2 | 5A | AX.89749828 | 4.73E+08 | 0.07 | -1381.73 | 4.27 | 0.07 |
| E1 | GPM2 | 5A | AX.89493117 | 5.81E+08 | 0.34 | -729.51  | 4.14 | 0.06 |
| E1 | GY   | 5A | AX.89479761 | 6.64E+08 | 0.22 | -2.88    | 3.32 | 0.06 |
| E1 | GY   | 5A | AX.89479761 | 6.64E+08 | 0.22 | -2.88    | 3.32 | 0.06 |
| E1 | GY   | 5A | AX.89490823 | 3.68E+08 | 0.09 | -4.47    | 3.70 | 0.07 |
| E1 | GY   | 5A | AX.89694942 | 3.68E+08 | 0.08 | -4.30    | 3.17 | 0.06 |
| E1 | GPM2 | 5A | AX.89733452 | 5.78E+08 | 0.29 | -695.74  | 3.53 | 0.05 |
| E1 | GPM2 | 5A | AX.89603908 | 5.81E+08 | 0.34 | -729.51  | 4.14 | 0.06 |
| E1 | GPM2 | 5A | AX.89427323 | 5.65E+08 | 0.13 | -872.04  | 3.20 | 0.05 |
| E1 | GY   | 5A | AX.89752925 | 5.70E+08 | 0.21 | -2.78    | 3.08 | 0.04 |
| E1 | GPM2 | 5A | AX.89600440 | 3.92E+08 | 0.18 | -864.36  | 3.81 | 0.07 |
| E1 | GPM2 | 5A | AX.89647546 | 5.79E+08 | 0.29 | -695.74  | 3.53 | 0.05 |
| E1 | GPM2 | 5A | AX.89418657 | 4.73E+08 | 0.08 | -1266.73 | 4.06 | 0.07 |
| E1 | GY   | 5A | AX.89774371 | 4.74E+08 | 0.07 | -6.06    | 5.51 | 0.09 |
| E1 | GY   | 5A | AX.89493604 | 4.79E+08 | 0.35 | 2.57     | 3.48 | 0.06 |
| E1 | GY   | 5A | AX.89596246 | 5.78E+08 | 0.29 | -2.59    | 3.24 | 0.05 |
| E1 | GPM2 | 5A | AX.89577447 | 5.81E+08 | 0.36 | -835.43  | 5.37 | 0.09 |
| E1 | GY   | 5A | AX.89412668 | 5.69E+08 | 0.21 | -2.78    | 3.08 | 0.04 |
| E1 | GPM2 | 5A | AX.89585065 | 5.78E+08 | 0.30 | -633.40  | 3.08 | 0.05 |
| E1 | GY   | 5A | AX.89494818 | 5.79E+08 | 0.28 | -2.74    | 3.52 | 0.05 |
| E1 | GPM2 | 5A | AX.89445986 | 5.81E+08 | 0.34 | -727.57  | 4.12 | 0.06 |
| E1 | GPM2 | 5A | AX.89531737 | 5.78E+08 | 0.29 | -695.74  | 3.53 | 0.05 |
| E1 | GPM2 | 5A | AX.89487661 | 5.79E+08 | 0.29 | -695.74  | 3.53 | 0.05 |



|    |      |    |             |          |      |          |      |      |
|----|------|----|-------------|----------|------|----------|------|------|
| E1 | GPM2 | 5A | AX.89476132 | 4.73E+08 | 0.08 | -1266.73 | 4.06 | 0.07 |
| E1 | GY   | 5A | AX.89320286 | 5.70E+08 | 0.21 | -2.78    | 3.08 | 0.04 |
| E1 | GPM2 | 5A | AX.89767420 | 5.82E+08 | 0.34 | -727.57  | 4.12 | 0.06 |
| E1 | GPM2 | 5A | AX.89767302 | 5.78E+08 | 0.29 | -695.74  | 3.53 | 0.05 |
| E1 | GPM2 | 5A | AX.89712955 | 4.73E+08 | 0.08 | -1266.73 | 4.06 | 0.07 |
| E1 | GY   | 5A | AX.89495938 | 1.87E+07 | 0.18 | -3.25    | 3.56 | 0.05 |
| E1 | GY   | 5A | AX.89495938 | 1.87E+07 | 0.18 | -3.25    | 3.56 | 0.05 |
| E1 | GPM2 | 5A | AX.89650222 | 4.74E+08 | 0.06 | -1484.86 | 4.31 | 0.07 |
| E1 | GPM2 | 5A | AX.89542560 | 4.73E+08 | 0.08 | -1266.73 | 4.06 | 0.07 |
| E1 | GPM2 | 5A | AX.89596246 | 5.78E+08 | 0.29 | -695.74  | 3.53 | 0.05 |
| E1 | GPM2 | 5A | AX.89678214 | 3.92E+08 | 0.18 | -864.36  | 3.81 | 0.07 |
| E1 | GPM2 | 5A | AX.89621656 | 4.73E+08 | 0.08 | -1266.73 | 4.06 | 0.07 |
| E1 | GPM2 | 5A | AX.89325026 | 3.92E+08 | 0.18 | -864.36  | 3.81 | 0.07 |
| E1 | GPM2 | 5A | AX.89500280 | 6.81E+08 | 0.13 | -881.44  | 3.10 | 0.05 |
| E1 | GY   | 5A | AX.89532286 | 6.81E+08 | 0.13 | -4.20    | 4.34 | 0.07 |
| E1 | GPM2 | 5A | AX.89503150 | 5.91E+08 | 0.28 | 648.13   | 3.10 | 0.05 |
| E1 | GY   | 5A | AX.89555729 | 5.78E+08 | 0.29 | -2.59    | 3.24 | 0.05 |
| E1 | GY   | 5A | AX.89755013 | 4.72E+08 | 0.07 | -5.65    | 4.36 | 0.07 |
| E1 | GY   | 5A | AX.89351383 | 5.80E+08 | 0.29 | -2.59    | 3.24 | 0.05 |
| E1 | GY   | 5A | AX.89434232 | 5.79E+08 | 0.28 | -2.74    | 3.52 | 0.05 |
| E1 | GY   | 5A | AX.89700666 | 5.70E+08 | 0.21 | -2.78    | 3.08 | 0.04 |
| E1 | GY   | 5A | AX.89611595 | 5.69E+08 | 0.21 | -2.78    | 3.08 | 0.04 |
| E1 | GPM2 | 5A | AX.89469235 | 5.78E+08 | 0.29 | -695.74  | 3.53 | 0.05 |
| E1 | GPM2 | 5A | AX.89373733 | 5.81E+08 | 0.34 | -729.51  | 4.14 | 0.06 |
| E1 | GPM2 | 5A | AX.89390857 | 5.78E+08 | 0.29 | -695.74  | 3.53 | 0.05 |
| E1 | GPM2 | 5A | AX.89378760 | 3.92E+08 | 0.18 | -864.36  | 3.81 | 0.07 |
| E1 | GPM2 | 5A | AX.89711068 | 5.78E+08 | 0.29 | -659.02  | 3.24 | 0.05 |
| E1 | GY   | 5A | AX.89613013 | 4.73E+08 | 0.08 | -6.05    | 5.77 | 0.10 |
| E1 | GPM2 | 5A | AX.89702845 | 4.45E+08 | 0.09 | -1005.28 | 3.10 | 0.05 |
| E1 | GPM2 | 5A | AX.89378056 | 3.92E+08 | 0.18 | -864.36  | 3.81 | 0.07 |
| E1 | GPM2 | 5A | AX.89493254 | 5.81E+08 | 0.34 | -727.57  | 4.12 | 0.06 |
| E1 | GPM2 | 5A | AX.89644166 | 4.45E+08 | 0.09 | -1005.28 | 3.10 | 0.05 |
| E1 | GPM2 | 5A | AX.89662391 | 5.81E+08 | 0.26 | -732.06  | 3.65 | 0.06 |
| E1 | GPM2 | 5A | AX.89312208 | 5.79E+08 | 0.28 | -737.77  | 3.87 | 0.06 |
| E1 | GPM2 | 5A | AX.89460465 | 5.81E+08 | 0.35 | -683.36  | 3.73 | 0.06 |
| E1 | GPM2 | 5A | AX.89380790 | 3.93E+08 | 0.17 | -780.65  | 3.09 | 0.05 |
| E1 | GPM2 | 5A | AX.89555957 | 5.81E+08 | 0.34 | -700.67  | 3.88 | 0.06 |
| E1 | GPM2 | 5A | AX.89513709 | 4.74E+08 | 0.07 | -1480.77 | 5.09 | 0.09 |
| E1 | GPM2 | 5A | AX.89708021 | 5.80E+08 | 0.29 | -695.74  | 3.53 | 0.05 |
| E1 | GPM2 | 5A | AX.89399742 | 5.30E+08 | 0.12 | -913.36  | 3.11 | 0.05 |
| E1 | GY   | 5A | AX.89674148 | 5.69E+08 | 0.21 | -2.78    | 3.08 | 0.04 |
| E1 | GPM2 | 5A | AX.89401647 | 5.82E+08 | 0.34 | -727.57  | 4.12 | 0.06 |
| E1 | GPM2 | 5A | AX.89324659 | 4.55E+08 | 0.10 | -1069.71 | 3.57 | 0.06 |
| E1 | GPM2 | 5A | AX.89532286 | 6.81E+08 | 0.13 | -881.44  | 3.10 | 0.05 |
| E1 | GPM2 | 5A | AX.89360516 | 5.78E+08 | 0.29 | -695.74  | 3.53 | 0.05 |
| E1 | GPM2 | 5A | AX.89736562 | 3.91E+08 | 0.18 | -864.36  | 3.81 | 0.07 |
| E1 | GPM2 | 5A | AX.89560177 | 5.81E+08 | 0.25 | 864.44   | 4.78 | 0.08 |
| E1 | GPM2 | 5A | AX.89528830 | 5.79E+08 | 0.28 | -737.77  | 3.87 | 0.06 |
| E1 | GPM2 | 5A | AX.89561103 | 4.75E+08 | 0.06 | -1316.29 | 3.28 | 0.05 |
| E1 | GPM2 | 5A | AX.89494818 | 5.79E+08 | 0.28 | -737.77  | 3.87 | 0.06 |

|    |      |    |             |          |      |          |      |      |
|----|------|----|-------------|----------|------|----------|------|------|
| E1 | GPM2 | 5A | AX.89641527 | 3.92E+08 | 0.18 | -864.36  | 3.81 | 0.07 |
| E1 | GPM2 | 5A | AX.89351708 | 5.81E+08 | 0.37 | -804.94  | 5.08 | 0.08 |
| E1 | GPM2 | 5A | AX.89486573 | 3.92E+08 | 0.18 | -864.36  | 3.81 | 0.07 |
| E1 | GPS  | 5A | AX.89320056 | 5.88E+08 | 0.12 | 1.73     | 3.03 | 0.05 |
| E1 | GPM2 | 5A | AX.89401627 | 5.80E+08 | 0.30 | -754.07  | 4.15 | 0.07 |
| E1 | GPM2 | 5A | AX.89331314 | 3.92E+08 | 0.18 | -864.36  | 3.81 | 0.07 |
| E1 | GPM2 | 5A | AX.89751458 | 5.81E+08 | 0.34 | -729.51  | 4.14 | 0.06 |
| E1 | GPM2 | 5A | AX.89434232 | 5.79E+08 | 0.28 | -737.77  | 3.87 | 0.06 |
| E1 | GPM2 | 5A | AX.89622904 | 5.78E+08 | 0.30 | -633.40  | 3.08 | 0.05 |
| E1 | GPS  | 5A | AX.89756768 | 5.65E+08 | 0.13 | -1.79    | 3.57 | 0.06 |
| E1 | GPM2 | 5A | AX.86184719 | 4.74E+08 | 0.07 | -1550.79 | 5.24 | 0.09 |
| E1 | GPM2 | 5A | AX.89391038 | 5.81E+08 | 0.25 | 864.44   | 4.78 | 0.08 |
| E1 | GPM2 | 5A | AX.89705726 | 5.81E+08 | 0.37 | -804.94  | 5.08 | 0.08 |
| E1 | GPM2 | 5A | AX.89616559 | 5.78E+08 | 0.30 | -673.27  | 3.39 | 0.05 |
| E1 | GPM2 | 5A | AX.89640535 | 3.95E+08 | 0.19 | -730.94  | 3.01 | 0.05 |
| E1 | GY   | 5A | AX.89626211 | 4.79E+08 | 0.35 | 2.57     | 3.48 | 0.06 |
| E1 | GPM2 | 5A | AX.89531245 | 5.81E+08 | 0.34 | -727.57  | 4.12 | 0.06 |
| E1 | GPM2 | 5A | AX.89407027 | 5.79E+08 | 0.28 | -737.77  | 3.87 | 0.06 |
| E1 | GPM2 | 5A | AX.89650252 | 4.45E+08 | 0.09 | -1005.28 | 3.10 | 0.05 |
| E1 | GPM2 | 5A | AX.89594418 | 4.45E+08 | 0.09 | -1005.28 | 3.10 | 0.05 |
| E1 | GPM2 | 5A | AX.89708510 | 5.81E+08 | 0.34 | -727.57  | 4.12 | 0.06 |
| E1 | GPM2 | 5A | AX.89656640 | 4.45E+08 | 0.09 | -1005.28 | 3.10 | 0.05 |
| E1 | GPM2 | 5A | AX.89400581 | 4.45E+08 | 0.09 | -1005.28 | 3.10 | 0.05 |
| E1 | GPS  | 5A | AX.89616368 | 5.86E+08 | 0.12 | 1.73     | 3.03 | 0.05 |
| E1 | GY   | 5A | AX.89577026 | 5.69E+08 | 0.21 | -2.78    | 3.08 | 0.04 |
| E1 | GPM2 | 5A | AX.89424196 | 5.65E+08 | 0.13 | -872.04  | 3.20 | 0.05 |
| E1 | GPM2 | 5A | AX.89411073 | 4.55E+08 | 0.09 | -1245.18 | 4.48 | 0.07 |
| E1 | GY   | 5A | AX.89750847 | 5.70E+08 | 0.20 | -2.86    | 3.10 | 0.05 |
| E1 | GY   | 5A | AX.89750847 | 5.70E+08 | 0.20 | -2.86    | 3.10 | 0.05 |
| E1 | GPM2 | 5A | AX.89419085 | 3.92E+08 | 0.18 | -864.36  | 3.81 | 0.07 |
| E1 | GPM2 | 5A | AX.89532578 | 5.81E+08 | 0.34 | -727.57  | 4.12 | 0.06 |
| E1 | GPM2 | 5A | AX.89475807 | 3.92E+08 | 0.17 | -780.65  | 3.09 | 0.05 |
| E1 | GPM2 | 5A | AX.89589337 | 3.92E+08 | 0.18 | -864.36  | 3.81 | 0.07 |
| E1 | GPM2 | 5A | AX.89344319 | 5.81E+08 | 0.28 | 691.33   | 3.43 | 0.05 |
| E1 | GPM2 | 5A | AX.89360663 | 5.78E+08 | 0.30 | -673.27  | 3.39 | 0.05 |
| E1 | GPM2 | 5A | AX.89635689 | 5.79E+08 | 0.28 | -737.77  | 3.87 | 0.06 |
| E1 | GPM2 | 5A | AX.89435020 | 5.81E+08 | 0.34 | -729.51  | 4.14 | 0.06 |
| E1 | GPM2 | 5A | AX.89775769 | 4.45E+08 | 0.09 | -1005.28 | 3.10 | 0.05 |
| E1 | GPM2 | 5A | AX.89539733 | 4.75E+08 | 0.05 | -1626.14 | 4.41 | 0.07 |
| E1 | GPM2 | 5A | AX.89410951 | 3.92E+08 | 0.18 | -864.36  | 3.81 | 0.07 |
| E1 | TKW  | 5A | AX.89530244 | 5.72E+08 | 0.36 | 0.90     | 3.22 | 0.06 |
| E1 | GPM2 | 5A | AX.89417785 | 5.79E+08 | 0.28 | -737.77  | 3.87 | 0.06 |
| E1 | GY   | 5A | AX.89545492 | 5.78E+08 | 0.29 | -2.59    | 3.24 | 0.05 |
| E1 | GPM2 | 5A | AX.89498534 | 3.92E+08 | 0.18 | -864.36  | 3.81 | 0.07 |
| E1 | TKW  | 5A | AX.89740372 | 6.10E+08 | 0.14 | -1.23    | 3.16 | 0.05 |
| E1 | TKW  | 5A | AX.89451889 | 5.93E+08 | 0.15 | -1.29    | 3.69 | 0.06 |
| E1 | GPM2 | 5A | AX.89332916 | 4.73E+08 | 0.08 | -1266.73 | 4.06 | 0.07 |
| E1 | GPM2 | 5A | AX.89546156 | 4.75E+08 | 0.05 | -1626.14 | 4.41 | 0.07 |
| E1 | GPM2 | 5A | AX.89319533 | 5.91E+08 | 0.28 | 648.13   | 3.10 | 0.05 |
| E1 | GPM2 | 5A | AX.89567885 | 3.92E+08 | 0.17 | -780.65  | 3.09 | 0.05 |

|    |      |    |             |          |      |          |      |      |
|----|------|----|-------------|----------|------|----------|------|------|
| E1 | GPM2 | 5A | AX.89514702 | 5.80E+08 | 0.29 | -695.74  | 3.53 | 0.05 |
| E1 | GPM2 | 5A | AX.89730190 | 4.55E+08 | 0.09 | -1245.18 | 4.48 | 0.07 |
| E1 | GPM2 | 5A | AX.89515116 | 5.80E+08 | 0.28 | -737.77  | 3.87 | 0.06 |
| E1 | TKW  | 5A | AX.89328335 | 5.93E+08 | 0.15 | -1.26    | 3.54 | 0.06 |
| E1 | GPM2 | 5A | AX.89741852 | 5.79E+08 | 0.29 | -695.74  | 3.53 | 0.05 |
| E1 | GPM2 | 5A | AX.89540951 | 4.45E+08 | 0.09 | -1005.28 | 3.10 | 0.05 |
| E1 | GPM2 | 5A | AX.89763670 | 5.81E+08 | 0.34 | -729.51  | 4.14 | 0.06 |
| E1 | GPM2 | 5A | AX.89693874 | 5.74E+08 | 0.25 | -695.53  | 3.24 | 0.05 |
| E1 | GPM2 | 5A | AX.89682075 | 4.76E+08 | 0.05 | -1626.14 | 4.41 | 0.07 |
| E1 | GPM2 | 5A | AX.89486014 | 5.81E+08 | 0.34 | -729.51  | 4.14 | 0.06 |
| E1 | GPM2 | 5A | AX.89641969 | 5.91E+08 | 0.28 | 648.13   | 3.10 | 0.05 |
| E1 | GY   | 5A | AX.89556661 | 6.64E+08 | 0.22 | -2.88    | 3.32 | 0.06 |
| E1 | GPM2 | 5A | AX.89756297 | 5.78E+08 | 0.30 | -633.40  | 3.08 | 0.05 |
| E1 | GPM2 | 5A | AX.89368848 | 5.81E+08 | 0.34 | -729.51  | 4.14 | 0.06 |
| E1 | GPM2 | 5A | AX.89415710 | 4.72E+08 | 0.07 | -1195.26 | 3.15 | 0.05 |
| E1 | GPM2 | 5A | AX.89528643 | 5.80E+08 | 0.29 | -695.74  | 3.53 | 0.05 |
| E1 | GPM2 | 5A | AX.89447670 | 4.45E+08 | 0.09 | -1005.28 | 3.10 | 0.05 |
| E1 | TKW  | 5A | AX.89393406 | 6.56E+08 | 0.07 | -1.66    | 3.26 | 0.05 |
| E1 | TKW  | 5A | AX.89592042 | 5.92E+08 | 0.15 | -1.28    | 3.52 | 0.06 |
| E1 | GPM2 | 5A | AX.89674761 | 4.74E+08 | 0.07 | -1550.79 | 5.24 | 0.09 |
| E1 | TKW  | 5A | AX.89401724 | 5.92E+08 | 0.14 | -1.21    | 3.06 | 0.05 |
| E1 | GPM2 | 5A | AX.89589560 | 4.45E+08 | 0.09 | -1005.28 | 3.10 | 0.05 |
| E1 | GY   | 5A | AX.89596246 | 5.78E+08 | 0.29 | -2.59    | 3.24 | 0.05 |
| E1 | GPM2 | 5A | AX.89725338 | 4.55E+08 | 0.09 | -1122.57 | 3.74 | 0.06 |
| E1 | GPM2 | 5A | AX.89613013 | 4.73E+08 | 0.08 | -1308.54 | 4.30 | 0.07 |
| E1 | GY   | 5A | AX.89620526 | 5.78E+08 | 0.29 | -2.59    | 3.24 | 0.05 |
| E1 | GPM2 | 5A | AX.89656992 | 5.81E+08 | 0.34 | -727.57  | 4.12 | 0.06 |
| E1 | TKW  | 5A | AX.89736983 | 6.19E+08 | 0.06 | -1.79    | 3.18 | 0.05 |
| E1 | GPM2 | 5A | AX.89394142 | 4.72E+08 | 0.07 | -1195.26 | 3.15 | 0.05 |
| E1 | GPM2 | 5A | AX.89755013 | 4.72E+08 | 0.07 | -1195.26 | 3.15 | 0.05 |
| E1 | GY   | 5A | AX.89674058 | 5.70E+08 | 0.20 | -3.18    | 3.77 | 0.06 |
| E1 | GPM2 | 5A | AX.89337299 | 5.81E+08 | 0.33 | -771.62  | 4.51 | 0.07 |
| E1 | GPM2 | 5A | AX.89711790 | 4.45E+08 | 0.09 | -1005.28 | 3.10 | 0.05 |
| E1 | GPM2 | 5A | AX.89744074 | 5.81E+08 | 0.37 | -794.54  | 4.96 | 0.08 |
| E1 | GPM2 | 5A | AX.89774371 | 4.74E+08 | 0.07 | -1480.77 | 5.09 | 0.09 |
| E1 | GPM2 | 5A | AX.89472573 | 6.81E+08 | 0.13 | -881.44  | 3.10 | 0.05 |
| E1 | GPM2 | 5A | AX.89521854 | 6.81E+08 | 0.13 | -881.44  | 3.10 | 0.05 |
| E1 | TKW  | 5A | AX.89506897 | 5.93E+08 | 0.15 | -1.26    | 3.54 | 0.06 |
| E1 | GPM2 | 5A | AX.89754412 | 5.65E+08 | 0.14 | -843.37  | 3.10 | 0.05 |
| E1 | TKW  | 5A | AX.89501141 | 5.92E+08 | 0.15 | -1.29    | 3.69 | 0.06 |
| E1 | TKW  | 5A | AX.89448049 | 5.93E+08 | 0.15 | -1.26    | 3.54 | 0.06 |
| E1 | TKW  | 5A | AX.89726776 | 5.93E+08 | 0.15 | -1.28    | 3.60 | 0.06 |
| E1 | TKW  | 5A | AX.89339102 | 5.92E+08 | 0.15 | -1.29    | 3.69 | 0.06 |
| E1 | TKW  | 5A | AX.89376560 | 5.92E+08 | 0.15 | -1.29    | 3.69 | 0.06 |
| E1 | TKW  | 5A | AX.89590662 | 5.92E+08 | 0.15 | -1.29    | 3.69 | 0.06 |
| E1 | TKW  | 5A | AX.89521768 | 5.93E+08 | 0.15 | -1.26    | 3.54 | 0.06 |
| E1 | TKW  | 5A | AX.89664402 | 5.91E+08 | 0.15 | -1.29    | 3.69 | 0.06 |
| E1 | TKW  | 5A | AX.89648813 | 6.99E+08 | 0.30 | 0.98     | 3.46 | 0.06 |
| E1 | TKW  | 5A | AX.89552993 | 6.99E+08 | 0.31 | 0.97     | 3.46 | 0.06 |
| E1 | TKW  | 5A | AX.89698761 | 5.92E+08 | 0.15 | -1.29    | 3.69 | 0.06 |

|    |      |    |             |          |      |          |      |      |
|----|------|----|-------------|----------|------|----------|------|------|
| E1 | TKW  | 5A | AX.89569078 | 5.93E+08 | 0.16 | -1.45    | 4.60 | 0.08 |
| E1 | TKW  | 5A | AX.89343248 | 5.92E+08 | 0.15 | -1.28    | 3.56 | 0.06 |
| E1 | TKW  | 5A | AX.89328677 | 6.19E+08 | 0.06 | -1.79    | 3.18 | 0.05 |
| E1 | TKW  | 5A | AX.89609993 | 5.92E+08 | 0.15 | -1.29    | 3.69 | 0.06 |
| E1 | TKW  | 5A | AX.89431815 | 5.93E+08 | 0.15 | -1.26    | 3.54 | 0.06 |
| E1 | TKW  | 5A | AX.89401313 | 5.92E+08 | 0.15 | -1.29    | 3.58 | 0.06 |
| E1 | TKW  | 5A | AX.89572135 | 6.99E+08 | 0.30 | 0.98     | 3.46 | 0.06 |
| E1 | TKW  | 5A | AX.89572605 | 5.93E+08 | 0.15 | -1.21    | 3.23 | 0.05 |
| E1 | TKW  | 5A | AX.89727760 | 5.92E+08 | 0.15 | -1.29    | 3.69 | 0.06 |
| E1 | TKW  | 5A | AX.89744415 | 5.93E+08 | 0.09 | -1.74    | 4.25 | 0.07 |
| E1 | TKW  | 5A | AX.89513782 | 5.92E+08 | 0.15 | -1.29    | 3.69 | 0.06 |
| E1 | TKW  | 5A | AX.89607657 | 5.92E+08 | 0.15 | -1.28    | 3.56 | 0.06 |
| E1 | TKW  | 5A | AX.89482956 | 6.99E+08 | 0.31 | 0.97     | 3.46 | 0.06 |
| E1 | GY   | 5A | AX.89682075 | 4.76E+08 | 0.05 | -6.87    | 5.04 | 0.08 |
| E1 | TKW  | 5A | AX.89319302 | 5.93E+08 | 0.15 | -1.26    | 3.54 | 0.06 |
| E1 | TKW  | 5A | AX.89762465 | 5.93E+08 | 0.15 | -1.25    | 3.37 | 0.06 |
| E1 | TKW  | 5A | AX.89705732 | 5.93E+08 | 0.15 | -1.26    | 3.54 | 0.06 |
| E1 | TKW  | 5A | AX.89411023 | 5.93E+08 | 0.15 | -1.26    | 3.54 | 0.06 |
| E1 | GY   | 5A | AX.89563193 | 5.70E+08 | 0.20 | -2.86    | 3.10 | 0.05 |
| E1 | TKW  | 5A | AX.89538796 | 5.91E+08 | 0.15 | -1.29    | 3.69 | 0.06 |
| E1 | TKW  | 5A | AX.89351345 | 5.93E+08 | 0.15 | -1.24    | 3.37 | 0.06 |
| E1 | TKW  | 5A | AX.89547739 | 5.92E+08 | 0.15 | -1.29    | 3.69 | 0.06 |
| E1 | TKW  | 5A | AX.89596583 | 5.92E+08 | 0.15 | -1.29    | 3.69 | 0.06 |
| E1 | GPM2 | 5A | AX.89348019 | 5.78E+08 | 0.29 | -695.74  | 3.53 | 0.05 |
| E1 | TKW  | 5A | AX.89325223 | 5.92E+08 | 0.13 | -1.36    | 3.58 | 0.06 |
| E1 | TKW  | 5A | AX.89525486 | 5.93E+08 | 0.15 | -1.26    | 3.54 | 0.06 |
| E1 | TKW  | 5A | AX.89402694 | 4.76E+08 | 0.07 | -1.78    | 3.69 | 0.06 |
| E1 | TKW  | 5A | AX.89730783 | 6.19E+08 | 0.06 | -1.79    | 3.18 | 0.05 |
| E1 | TKW  | 5A | AX.89340018 | 5.92E+08 | 0.15 | -1.29    | 3.69 | 0.06 |
| E1 | GPM2 | 5A | AX.89459954 | 5.81E+08 | 0.34 | -727.57  | 4.12 | 0.06 |
| E1 | TKW  | 5A | AX.89450449 | 5.91E+08 | 0.15 | -1.29    | 3.69 | 0.06 |
| E1 | GPM2 | 5A | AX.89367689 | 5.74E+08 | 0.25 | -695.53  | 3.24 | 0.05 |
| E1 | GPM2 | 5A | AX.89773817 | 5.80E+08 | 0.28 | -737.77  | 3.87 | 0.06 |
| E1 | TKW  | 5A | AX.89360530 | 5.75E+08 | 0.10 | -1.51    | 3.57 | 0.06 |
| E1 | TKW  | 5A | AX.89568865 | 5.93E+08 | 0.15 | -1.26    | 3.54 | 0.06 |
| E1 | TKW  | 5A | AX.89549497 | 7.00E+08 | 0.29 | 0.91     | 3.01 | 0.05 |
| E1 | TKW  | 5A | AX.89324893 | 5.92E+08 | 0.15 | -1.29    | 3.69 | 0.06 |
| E1 | TKW  | 5A | AX.89654262 | 5.92E+08 | 0.13 | -1.40    | 3.84 | 0.06 |
| E1 | GPM2 | 5A | AX.89566557 | 3.92E+08 | 0.18 | -864.36  | 3.81 | 0.07 |
| E1 | GPM2 | 5A | AX.89490507 | 3.92E+08 | 0.18 | -864.36  | 3.81 | 0.07 |
| E1 | TKW  | 5A | AX.89417671 | 6.19E+08 | 0.10 | -1.59    | 3.78 | 0.07 |
| E1 | TKW  | 5A | AX.89394192 | 5.92E+08 | 0.15 | -1.29    | 3.69 | 0.06 |
| E1 | GPM2 | 5A | AX.89554532 | 4.56E+08 | 0.08 | -1230.47 | 3.86 | 0.06 |
| E1 | TKW  | 5A | AX.89491555 | 5.92E+08 | 0.15 | -1.29    | 3.69 | 0.06 |
| E1 | TKW  | 5A | AX.89529513 | 5.92E+08 | 0.15 | -1.29    | 3.69 | 0.06 |
| E1 | TKW  | 5A | AX.89700655 | 5.93E+08 | 0.15 | -1.26    | 3.54 | 0.06 |
| E1 | TKW  | 5A | AX.89366464 | 5.93E+08 | 0.14 | -1.36    | 3.74 | 0.06 |
| E1 | TKW  | 5A | AX.89659132 | 5.92E+08 | 0.15 | -1.29    | 3.69 | 0.06 |
| E1 | GPM2 | 5A | AX.89436972 | 4.56E+08 | 0.07 | -1192.54 | 3.49 | 0.06 |
| E1 | GPM2 | 5A | AX.89693326 | 4.55E+08 | 0.09 | -1245.18 | 4.48 | 0.07 |

|    |      |    |             |          |      |          |      |      |
|----|------|----|-------------|----------|------|----------|------|------|
| E1 | GPM2 | 5A | AX.89744768 | 5.80E+08 | 0.29 | -695.74  | 3.53 | 0.05 |
| E1 | TKW  | 5A | AX.89740910 | 6.19E+08 | 0.06 | -1.79    | 3.18 | 0.05 |
| E1 | GPM2 | 5A | AX.89711199 | 5.81E+08 | 0.33 | -723.24  | 4.05 | 0.06 |
| E1 | TKW  | 5A | AX.89547534 | 5.92E+08 | 0.15 | -1.29    | 3.69 | 0.06 |
| E1 | GPM2 | 5A | AX.89762948 | 5.79E+08 | 0.29 | -695.74  | 3.53 | 0.05 |
| E1 | TKW  | 5A | AX.89595049 | 5.93E+08 | 0.15 | -1.24    | 3.37 | 0.06 |
| E1 | TKW  | 5A | AX.89556011 | 5.93E+08 | 0.16 | -1.27    | 3.66 | 0.06 |
| E1 | GPM2 | 5A | AX.89622353 | 4.45E+08 | 0.09 | -1005.28 | 3.10 | 0.05 |
| E1 | TKW  | 5A | AX.89352690 | 5.93E+08 | 0.15 | -1.26    | 3.54 | 0.06 |
| E1 | TKW  | 5A | AX.89570517 | 5.92E+08 | 0.15 | -1.29    | 3.69 | 0.06 |
| E1 | TKW  | 5A | AX.89460348 | 5.92E+08 | 0.15 | -1.29    | 3.69 | 0.06 |
| E1 | TKW  | 5A | AX.89727386 | 5.92E+08 | 0.15 | -1.29    | 3.69 | 0.06 |
| E1 | TKW  | 5A | AX.89651928 | 5.92E+08 | 0.15 | -1.29    | 3.69 | 0.06 |
| E1 | GPM2 | 5A | AX.89384981 | 4.45E+08 | 0.09 | -1005.28 | 3.10 | 0.05 |
| E1 | TKW  | 5A | AX.89611087 | 5.93E+08 | 0.13 | -1.24    | 3.13 | 0.05 |
| E1 | TKW  | 5A | AX.89425333 | 5.92E+08 | 0.15 | -1.28    | 3.56 | 0.06 |
| E1 | TKW  | 5A | AX.89499595 | 5.92E+08 | 0.15 | -1.24    | 3.33 | 0.05 |
| E1 | TKW  | 5A | AX.89332451 | 5.93E+08 | 0.15 | -1.29    | 3.69 | 0.06 |
| E1 | TKW  | 5A | AX.89488830 | 6.19E+08 | 0.09 | -1.77    | 4.37 | 0.08 |
| E1 | GPM2 | 5A | AX.89613621 | 5.79E+08 | 0.27 | -709.06  | 3.55 | 0.05 |
| E1 | GPM2 | 5A | AX.89696551 | 4.56E+08 | 0.07 | -1192.54 | 3.49 | 0.06 |
| E1 | GPM2 | 5A | AX.89704030 | 5.81E+08 | 0.33 | -734.09  | 4.16 | 0.07 |
| E1 | TKW  | 5A | AX.89348621 | 5.93E+08 | 0.15 | -1.24    | 3.37 | 0.06 |
| E1 | TKW  | 5A | AX.89403916 | 5.93E+08 | 0.15 | -1.26    | 3.54 | 0.06 |
| E1 | TKW  | 5A | AX.89618348 | 5.92E+08 | 0.15 | -1.29    | 3.69 | 0.06 |
| E1 | GPM2 | 5A | AX.89606410 | 3.93E+08 | 0.17 | -780.65  | 3.09 | 0.05 |
| E1 | TKW  | 5A | AX.89406356 | 6.19E+08 | 0.06 | -1.79    | 3.18 | 0.05 |
| E1 | GY   | 5A | AX.89620526 | 5.78E+08 | 0.29 | -2.59    | 3.24 | 0.05 |
| E1 | GPM2 | 5A | AX.89740114 | 4.72E+08 | 0.07 | -1195.26 | 3.15 | 0.05 |
| E1 | GPM2 | 5A | AX.89554323 | 3.92E+08 | 0.18 | -864.36  | 3.81 | 0.07 |
| E1 | TKW  | 5A | AX.89632277 | 5.92E+08 | 0.15 | -1.29    | 3.69 | 0.06 |
| E1 | GPM2 | 5A | AX.89370748 | 3.95E+08 | 0.19 | -756.14  | 3.19 | 0.05 |
| E1 | TKW  | 5A | AX.89399161 | 5.92E+08 | 0.15 | -1.29    | 3.69 | 0.06 |
| E1 | TKW  | 5A | AX.89738281 | 5.92E+08 | 0.15 | -1.29    | 3.69 | 0.06 |
| E1 | TKW  | 5A | AX.89549707 | 6.19E+08 | 0.06 | -1.79    | 3.18 | 0.05 |
| E1 | TKW  | 5A | AX.89661979 | 5.93E+08 | 0.16 | -1.27    | 3.66 | 0.06 |
| E1 | TKW  | 5A | AX.89733618 | 5.92E+08 | 0.15 | -1.29    | 3.69 | 0.06 |
| E1 | TKW  | 5A | AX.89663074 | 5.93E+08 | 0.16 | -1.27    | 3.66 | 0.06 |
| E1 | TKW  | 5A | AX.89744976 | 5.92E+08 | 0.15 | -1.28    | 3.56 | 0.06 |
| E1 | TKW  | 5A | AX.89496362 | 5.93E+08 | 0.16 | -1.27    | 3.66 | 0.06 |
| E1 | TKW  | 5A | AX.89609628 | 5.92E+08 | 0.15 | -1.29    | 3.69 | 0.06 |
| E1 | TKW  | 5A | AX.89593804 | 5.92E+08 | 0.15 | -1.29    | 3.69 | 0.06 |
| E1 | TKW  | 5A | AX.89611555 | 5.93E+08 | 0.15 | -1.29    | 3.69 | 0.06 |
| E1 | TKW  | 5A | AX.89549846 | 5.91E+08 | 0.15 | -1.29    | 3.69 | 0.06 |
| E1 | TKW  | 5A | AX.89522203 | 5.91E+08 | 0.15 | -1.18    | 3.06 | 0.05 |
| E2 | SPM2 | 5A | AX.89329110 | 5.91E+08 | 0.16 | 16.53    | 3.30 | 0.06 |
| E2 | SPM2 | 5A | AX.89503606 | 4.57E+08 | 0.30 | -12.81   | 3.07 | 0.05 |
| E2 | SPM2 | 5A | AX.89422654 | 5.91E+08 | 0.14 | 17.36    | 3.29 | 0.06 |
| E2 | SPM2 | 5A | AX.89446349 | 5.91E+08 | 0.14 | 18.42    | 3.56 | 0.06 |
| E2 | SPM2 | 5A | AX.89654471 | 5.82E+08 | 0.19 | 17.90    | 4.22 | 0.07 |

|    |      |    |             |          |      |        |      |      |
|----|------|----|-------------|----------|------|--------|------|------|
| E2 | SPM2 | 5A | AX.89675525 | 5.91E+08 | 0.14 | 18.42  | 3.56 | 0.06 |
| E2 | SPM2 | 5A | AX.89309938 | 5.91E+08 | 0.13 | 18.23  | 3.41 | 0.06 |
| E2 | SPM2 | 5A | AX.89605708 | 4.57E+08 | 0.24 | -13.70 | 3.08 | 0.05 |
| E2 | SPM2 | 5A | AX.89455246 | 5.91E+08 | 0.18 | 15.43  | 3.10 | 0.05 |
| E2 | SPM2 | 5A | AX.89644722 | 6.81E+08 | 0.13 | -18.44 | 3.30 | 0.05 |
| E2 | GY   | 5A | AX.89613013 | 4.73E+08 | 0.08 | -3.60  | 3.18 | 0.04 |
| E2 | SPM2 | 5A | AX.89479046 | 5.91E+08 | 0.18 | 15.43  | 3.10 | 0.05 |
| E2 | SPM2 | 5A | AX.89723955 | 4.57E+08 | 0.27 | -14.74 | 3.75 | 0.06 |
| E2 | SPM2 | 5A | AX.89459492 | 4.56E+08 | 0.22 | -14.42 | 3.21 | 0.05 |
| E2 | SPM2 | 5A | AX.89498484 | 4.57E+08 | 0.24 | -13.70 | 3.08 | 0.05 |
| E2 | GY   | 5A | AX.89486715 | 5.65E+08 | 0.10 | -3.24  | 3.18 | 0.04 |
| E2 | GY   | 5A | AX.89486715 | 5.65E+08 | 0.10 | -3.24  | 3.18 | 0.04 |
| E2 | SPM2 | 5A | AX.89432626 | 5.91E+08 | 0.17 | 17.23  | 3.61 | 0.06 |
| E2 | SPM2 | 5A | AX.89475722 | 5.91E+08 | 0.14 | 17.36  | 3.29 | 0.06 |
| E2 | GY   | 5A | AX.89741234 | 3.81E+08 | 0.08 | -3.57  | 3.17 | 0.06 |
| E2 | SPM2 | 5A | AX.89570034 | 5.91E+08 | 0.14 | 18.42  | 3.56 | 0.06 |
| E2 | SPM2 | 5A | AX.89750309 | 4.57E+08 | 0.27 | -14.28 | 3.52 | 0.05 |
| E2 | SPM2 | 5A | AX.89640894 | 5.91E+08 | 0.13 | 18.23  | 3.41 | 0.06 |
| E2 | SPM2 | 5A | AX.89607655 | 5.91E+08 | 0.14 | 18.42  | 3.56 | 0.06 |
| E2 | SPM2 | 5A | AX.89469921 | 5.91E+08 | 0.14 | 18.42  | 3.56 | 0.06 |
| E2 | SPM2 | 5A | AX.89396115 | 5.91E+08 | 0.14 | 18.42  | 3.56 | 0.06 |
| E2 | SPM2 | 5A | AX.89689348 | 5.91E+08 | 0.14 | 17.36  | 3.29 | 0.06 |
| E2 | SPM2 | 5A | AX.89655112 | 5.91E+08 | 0.18 | 15.43  | 3.10 | 0.05 |
| E2 | GY   | 5A | AX.89518533 | 5.68E+08 | 0.06 | -4.28  | 3.32 | 0.04 |
| E2 | SPM2 | 5A | AX.89425879 | 5.91E+08 | 0.14 | 17.36  | 3.29 | 0.06 |
| E2 | SPM2 | 5A | AX.89355605 | 5.91E+08 | 0.14 | 18.16  | 3.48 | 0.06 |
| E2 | GY   | 5A | AX.89330863 | 3.81E+08 | 0.08 | -3.57  | 3.17 | 0.06 |
| E2 | SPM2 | 5A | AX.89590910 | 5.91E+08 | 0.14 | 18.42  | 3.56 | 0.06 |
| E2 | SPM2 | 5A | AX.89485068 | 5.91E+08 | 0.18 | 15.43  | 3.10 | 0.05 |
| E2 | SPM2 | 5A | AX.89405358 | 5.91E+08 | 0.18 | 15.43  | 3.10 | 0.05 |
| E2 | SPM2 | 5A | AX.89646271 | 5.91E+08 | 0.18 | 15.43  | 3.10 | 0.05 |
| E2 | SPM2 | 5A | AX.89600246 | 5.91E+08 | 0.14 | 18.42  | 3.56 | 0.06 |
| E2 | SPM2 | 5A | AX.89639104 | 5.91E+08 | 0.14 | 18.42  | 3.56 | 0.06 |
| E2 | SPM2 | 5A | AX.89446239 | 5.91E+08 | 0.18 | 15.43  | 3.10 | 0.05 |
| E2 | SPM2 | 5A | AX.89393657 | 5.91E+08 | 0.18 | 15.43  | 3.10 | 0.05 |
| E2 | SPM2 | 5A | AX.89415579 | 4.57E+08 | 0.25 | -14.10 | 3.31 | 0.05 |
| E2 | SPM2 | 5A | AX.89354699 | 5.81E+08 | 0.19 | 17.90  | 4.22 | 0.07 |
| E2 | SPM2 | 5A | AX.89592825 | 5.91E+08 | 0.17 | 17.45  | 3.76 | 0.07 |
| E2 | SPM2 | 5A | AX.89432182 | 5.91E+08 | 0.14 | 18.42  | 3.56 | 0.06 |
| E2 | SPM2 | 5A | AX.89337095 | 6.81E+08 | 0.14 | -16.73 | 3.02 | 0.05 |
| E2 | SPM2 | 5A | AX.89405076 | 4.57E+08 | 0.27 | -14.28 | 3.52 | 0.05 |
| E2 | SPM2 | 5A | AX.89487227 | 5.91E+08 | 0.14 | 18.42  | 3.56 | 0.06 |
| E2 | SPM2 | 5A | AX.89475870 | 4.55E+08 | 0.09 | 25.12  | 4.32 | 0.08 |
| E2 | SPM2 | 5A | AX.89356136 | 5.91E+08 | 0.14 | 18.42  | 3.56 | 0.06 |
| E2 | SPM2 | 5A | AX.89511267 | 5.91E+08 | 0.14 | 18.42  | 3.56 | 0.06 |
| E2 | SPM2 | 5A | AX.89688283 | 5.91E+08 | 0.14 | 18.42  | 3.56 | 0.06 |
| E2 | SPM2 | 5A | AX.89566356 | 5.91E+08 | 0.14 | 18.42  | 3.56 | 0.06 |
| E2 | SPM2 | 5A | AX.89450821 | 4.57E+08 | 0.30 | -12.81 | 3.07 | 0.05 |
| E2 | GY   | 5A | AX.89437997 | 3.69E+08 | 0.09 | -4.50  | 5.15 | 0.10 |
| E2 | SPM2 | 5A | AX.89390499 | 5.91E+08 | 0.14 | 18.42  | 3.56 | 0.06 |

|    |      |    |             |          |      |        |      |      |
|----|------|----|-------------|----------|------|--------|------|------|
| E2 | SPM2 | 5A | AX.89722106 | 5.91E+08 | 0.14 | 18.16  | 3.48 | 0.06 |
| E2 | SPM2 | 5A | AX.89443602 | 5.91E+08 | 0.17 | 16.77  | 3.45 | 0.06 |
| E2 | SPM2 | 5A | AX.89546715 | 5.91E+08 | 0.14 | 18.42  | 3.56 | 0.06 |
| E2 | SPM2 | 5A | AX.89500280 | 6.81E+08 | 0.13 | -18.44 | 3.30 | 0.05 |
| E2 | GY   | 5A | AX.89712014 | 4.77E+08 | 0.14 | -2.93  | 3.44 | 0.05 |
| E2 | GY   | 5A | AX.89712014 | 4.77E+08 | 0.14 | -2.93  | 3.44 | 0.05 |
| E2 | SPM2 | 5A | AX.89773731 | 4.56E+08 | 0.22 | -14.42 | 3.21 | 0.05 |
| E2 | SPM2 | 5A | AX.89660827 | 5.91E+08 | 0.14 | 17.36  | 3.29 | 0.06 |
| E2 | GY   | 5A | AX.89566490 | 4.73E+08 | 0.07 | -3.89  | 3.47 | 0.05 |
| E2 | GY   | 5A | AX.89566490 | 4.73E+08 | 0.07 | -3.89  | 3.47 | 0.05 |
| E2 | SPM2 | 5A | AX.89411312 | 4.56E+08 | 0.22 | -14.42 | 3.21 | 0.05 |
| E2 | SPM2 | 5A | AX.89657151 | 5.91E+08 | 0.18 | 15.43  | 3.10 | 0.05 |
| E2 | SPM2 | 5A | AX.89549067 | 5.91E+08 | 0.17 | 18.12  | 3.94 | 0.07 |
| E2 | GY   | 5A | AX.89332916 | 4.73E+08 | 0.08 | -3.71  | 3.34 | 0.05 |
| E2 | SPM2 | 5A | AX.89498270 | 5.91E+08 | 0.13 | 17.83  | 3.29 | 0.06 |
| E2 | SPM2 | 5A | AX.89739131 | 5.69E+08 | 0.09 | 21.63  | 3.47 | 0.06 |
| E2 | SPM2 | 5A | AX.89733858 | 4.57E+08 | 0.30 | -12.81 | 3.07 | 0.05 |
| E2 | SPM2 | 5A | AX.89696752 | 5.91E+08 | 0.14 | 18.42  | 3.56 | 0.06 |
| E2 | SPM2 | 5A | AX.89576830 | 5.91E+08 | 0.14 | 18.42  | 3.56 | 0.06 |
| E2 | SPM2 | 5A | AX.89755253 | 5.91E+08 | 0.14 | 18.42  | 3.56 | 0.06 |
| E2 | SPM2 | 5A | AX.89359545 | 5.81E+08 | 0.19 | 17.90  | 4.22 | 0.07 |
| E2 | GY   | 5A | AX.89439613 | 3.81E+08 | 0.08 | -3.57  | 3.17 | 0.06 |
| E2 | SPM2 | 5A | AX.89461566 | 6.83E+08 | 0.12 | -18.29 | 3.17 | 0.05 |
| E2 | SPM2 | 5A | AX.89383545 | 5.91E+08 | 0.14 | 18.42  | 3.56 | 0.06 |
| E2 | GY   | 5A | AX.89413159 | 5.49E+08 | 0.09 | -4.21  | 4.62 | 0.09 |
| E2 | SPM2 | 5A | AX.89629830 | 5.91E+08 | 0.14 | 18.42  | 3.56 | 0.06 |
| E2 | SPM2 | 5A | AX.89439755 | 5.91E+08 | 0.14 | 17.36  | 3.29 | 0.06 |
| E2 | GY   | 5A | AX.89714237 | 3.80E+08 | 0.08 | -3.57  | 3.17 | 0.06 |
| E2 | SPM2 | 5A | AX.89526576 | 5.91E+08 | 0.14 | 18.42  | 3.56 | 0.06 |
| E2 | SPM2 | 5A | AX.89764051 | 5.91E+08 | 0.14 | 18.42  | 3.56 | 0.06 |
| E2 | SPM2 | 5A | AX.89611987 | 5.91E+08 | 0.17 | 17.45  | 3.76 | 0.07 |
| E2 | SPM2 | 5A | AX.89651257 | 5.91E+08 | 0.14 | 18.42  | 3.56 | 0.06 |
| E2 | SPM2 | 5A | AX.89455252 | 5.91E+08 | 0.14 | 18.42  | 3.56 | 0.06 |
| E2 | SPM2 | 5A | AX.89521854 | 6.81E+08 | 0.13 | -18.44 | 3.30 | 0.05 |
| E2 | SPM2 | 5A | AX.89388125 | 5.81E+08 | 0.19 | 17.90  | 4.22 | 0.07 |
| E2 | SPM2 | 5A | AX.89452857 | 5.91E+08 | 0.14 | 18.42  | 3.56 | 0.06 |
| E2 | SPM2 | 5A | AX.89714178 | 5.91E+08 | 0.14 | 18.42  | 3.56 | 0.06 |
| E2 | SPM2 | 5A | AX.89358223 | 5.82E+08 | 0.19 | 17.90  | 4.22 | 0.07 |
| E2 | SPM2 | 5A | AX.89392497 | 6.88E+08 | 0.07 | 27.18  | 4.32 | 0.08 |
| E2 | SPM2 | 5A | AX.89566662 | 5.91E+08 | 0.14 | 18.42  | 3.56 | 0.06 |
| E2 | SPM2 | 5A | AX.89651661 | 4.57E+08 | 0.30 | -12.81 | 3.07 | 0.05 |
| E2 | GY   | 5A | AX.89546156 | 4.75E+08 | 0.05 | -5.53  | 4.73 | 0.07 |
| E2 | SPM2 | 5A | AX.89740428 | 5.91E+08 | 0.14 | 18.42  | 3.56 | 0.06 |
| E2 | SPM2 | 5A | AX.89517401 | 5.91E+08 | 0.17 | 15.46  | 3.00 | 0.05 |
| E2 | GY   | 5A | AX.89650222 | 4.74E+08 | 0.06 | -4.40  | 3.64 | 0.05 |
| E2 | SPM2 | 5A | AX.89764773 | 5.91E+08 | 0.17 | 17.45  | 3.76 | 0.07 |
| E2 | SPM2 | 5A | AX.89321995 | 5.91E+08 | 0.14 | 18.42  | 3.56 | 0.06 |
| E2 | SPM2 | 5A | AX.89319421 | 5.91E+08 | 0.14 | 18.42  | 3.56 | 0.06 |
| E2 | SPM2 | 5A | AX.89644682 | 5.91E+08 | 0.14 | 18.42  | 3.56 | 0.06 |
| E2 | SPM2 | 5A | AX.89328375 | 5.91E+08 | 0.13 | 18.98  | 3.66 | 0.06 |

|    |      |    |             |          |      |        |      |      |
|----|------|----|-------------|----------|------|--------|------|------|
| E2 | SPM2 | 5A | AX.89406602 | 5.81E+08 | 0.19 | 17.90  | 4.22 | 0.07 |
| E2 | SPM2 | 5A | AX.89436077 | 5.69E+08 | 0.09 | 20.41  | 3.14 | 0.05 |
| E2 | SPM2 | 5A | AX.89486409 | 5.91E+08 | 0.14 | 17.36  | 3.29 | 0.06 |
| E2 | SPM2 | 5A | AX.89361782 | 4.57E+08 | 0.30 | -12.81 | 3.07 | 0.05 |
| E2 | SPM2 | 5A | AX.89739930 | 5.91E+08 | 0.14 | 18.42  | 3.56 | 0.06 |
| E2 | SPM2 | 5A | AX.89578026 | 5.91E+08 | 0.18 | 15.43  | 3.10 | 0.05 |
| E2 | SPM2 | 5A | AX.89744654 | 3.96E+08 | 0.21 | 15.75  | 3.58 | 0.06 |
| E2 | SPM2 | 5A | AX.89774599 | 5.91E+08 | 0.17 | 16.77  | 3.45 | 0.06 |
| E2 | SPM2 | 5A | AX.89392107 | 5.91E+08 | 0.17 | 15.72  | 3.14 | 0.05 |
| E2 | GY   | 5A | AX.89513709 | 4.74E+08 | 0.07 | -3.79  | 3.31 | 0.05 |
| E2 | SPM2 | 5A | AX.89699773 | 4.57E+08 | 0.30 | -12.81 | 3.07 | 0.05 |
| E2 | SPM2 | 5A | AX.89350670 | 5.91E+08 | 0.14 | 17.14  | 3.15 | 0.05 |
| E2 | SPM2 | 5A | AX.89668680 | 4.57E+08 | 0.25 | -14.10 | 3.31 | 0.05 |
| E2 | SPM2 | 5A | AX.89415719 | 5.91E+08 | 0.13 | 18.23  | 3.41 | 0.06 |
| E2 | SPM2 | 5A | AX.89559978 | 5.91E+08 | 0.16 | 16.53  | 3.30 | 0.06 |
| E2 | SPM2 | 5A | AX.89713998 | 5.91E+08 | 0.14 | 18.42  | 3.56 | 0.06 |
| E2 | SPM2 | 5A | AX.89577272 | 4.56E+08 | 0.25 | -13.99 | 3.26 | 0.05 |
| E2 | SPM2 | 5A | AX.89692604 | 4.57E+08 | 0.22 | -14.11 | 3.09 | 0.05 |
| E2 | SPM2 | 5A | AX.89455496 | 5.91E+08 | 0.13 | 18.23  | 3.41 | 0.06 |
| E2 | SPM2 | 5A | AX.89736318 | 4.57E+08 | 0.30 | -12.81 | 3.07 | 0.05 |
| E2 | SPM2 | 5A | AX.89532286 | 6.81E+08 | 0.13 | -18.44 | 3.30 | 0.05 |
| E2 | SPM2 | 5A | AX.89564241 | 5.91E+08 | 0.14 | 18.42  | 3.56 | 0.06 |
| E2 | SPM2 | 5A | AX.89580173 | 4.57E+08 | 0.27 | -14.28 | 3.52 | 0.05 |
| E2 | SPM2 | 5A | AX.89506778 | 5.91E+08 | 0.14 | 18.42  | 3.56 | 0.06 |
| E2 | GY   | 5A | AX.89627247 | 4.74E+08 | 0.07 | -3.79  | 3.31 | 0.05 |
| E2 | GY   | 5A | AX.89627247 | 4.74E+08 | 0.07 | -3.79  | 3.31 | 0.05 |
| E2 | SPM2 | 5A | AX.89689096 | 4.57E+08 | 0.30 | -12.81 | 3.07 | 0.05 |
| E2 | SPM2 | 5A | AX.89434282 | 4.56E+08 | 0.22 | -14.42 | 3.21 | 0.05 |
| E2 | SPM2 | 5A | AX.89571547 | 5.91E+08 | 0.18 | 15.43  | 3.10 | 0.05 |
| E2 | SPM2 | 5A | AX.89747789 | 5.91E+08 | 0.14 | 18.42  | 3.56 | 0.06 |
| E2 | SPM2 | 5A | AX.89744840 | 5.81E+08 | 0.19 | 17.90  | 4.22 | 0.07 |
| E2 | SPM2 | 5A | AX.89314318 | 5.94E+08 | 0.13 | 18.10  | 3.20 | 0.05 |
| E2 | SPM2 | 5A | AX.89557528 | 5.91E+08 | 0.14 | 18.42  | 3.56 | 0.06 |
| E2 | SPM2 | 5A | AX.89504161 | 5.91E+08 | 0.14 | 18.42  | 3.56 | 0.06 |
| E2 | SPM2 | 5A | AX.89474520 | 4.57E+08 | 0.28 | -13.24 | 3.15 | 0.05 |
| E2 | GY   | 5A | AX.89397690 | 3.80E+08 | 0.08 | -3.57  | 3.17 | 0.06 |
| E2 | SPM2 | 5A | AX.89363819 | 5.91E+08 | 0.14 | 18.42  | 3.56 | 0.06 |
| E2 | SPM2 | 5A | AX.89411071 | 5.91E+08 | 0.13 | 18.23  | 3.41 | 0.06 |
| E2 | GY   | 5A | AX.89561103 | 4.75E+08 | 0.06 | -4.56  | 3.63 | 0.05 |
| E2 | SPM2 | 5A | AX.89472573 | 6.81E+08 | 0.13 | -18.44 | 3.30 | 0.05 |
| E2 | SPM2 | 5A | AX.89569627 | 5.91E+08 | 0.14 | 18.99  | 3.75 | 0.06 |
| E2 | SPM2 | 5A | AX.89754487 | 5.91E+08 | 0.18 | 15.43  | 3.10 | 0.05 |
| E2 | SPM2 | 5A | AX.89763298 | 5.91E+08 | 0.14 | 18.42  | 3.56 | 0.06 |
| E2 | SPM2 | 5A | AX.89332492 | 5.91E+08 | 0.18 | 15.43  | 3.10 | 0.05 |
| E2 | GY   | 5A | AX.89755013 | 4.72E+08 | 0.07 | -5.65  | 6.01 | 0.10 |
| E2 | GY   | 5A | AX.89755013 | 4.72E+08 | 0.07 | -5.65  | 6.01 | 0.10 |
| E2 | SPM2 | 5A | AX.89746639 | 5.91E+08 | 0.14 | 17.36  | 3.29 | 0.06 |
| E2 | SPM2 | 5A | AX.89648926 | 5.91E+08 | 0.14 | 18.42  | 3.56 | 0.06 |
| E2 | SPM2 | 5A | AX.89425021 | 5.91E+08 | 0.14 | 18.42  | 3.56 | 0.06 |
| E2 | SPM2 | 5A | AX.89542662 | 5.91E+08 | 0.18 | 15.43  | 3.10 | 0.05 |



|    |      |    |             |          |      |         |      |      |
|----|------|----|-------------|----------|------|---------|------|------|
| E2 | SPM2 | 5A | AX.89749149 | 5.91E+08 | 0.18 | 15.43   | 3.10 | 0.05 |
| E2 | SPM2 | 5A | AX.89770722 | 5.91E+08 | 0.13 | 18.81   | 3.51 | 0.06 |
| E2 | SPM2 | 5A | AX.89520608 | 5.91E+08 | 0.14 | 18.42   | 3.56 | 0.06 |
| E2 | GY   | 5A | AX.89550132 | 3.70E+08 | 0.09 | -4.50   | 5.15 | 0.10 |
| E2 | GY   | 5A | AX.89550132 | 3.70E+08 | 0.09 | -4.50   | 5.15 | 0.10 |
| E2 | GY   | 5A | AX.89375487 | 1.96E+07 | 0.06 | -4.28   | 3.23 | 0.07 |
| E2 | GY   | 5A | AX.89375487 | 1.96E+07 | 0.06 | -4.28   | 3.23 | 0.07 |
| E2 | GY   | 5A | AX.89539733 | 4.75E+08 | 0.05 | -5.53   | 4.73 | 0.07 |
| E2 | GY   | 5A | AX.89539733 | 4.75E+08 | 0.05 | -5.53   | 4.73 | 0.07 |
| E2 | GPM2 | 5A | AX.89600440 | 3.92E+08 | 0.18 | -719.55 | 3.80 | 0.07 |
| E2 | GY   | 5A | AX.89377150 | 3.81E+08 | 0.08 | -3.57   | 3.17 | 0.06 |
| E2 | GY   | 5A | AX.89377150 | 3.81E+08 | 0.08 | -3.57   | 3.17 | 0.06 |
| E2 | GY   | 5A | AX.89413692 | 3.82E+08 | 0.08 | -3.57   | 3.17 | 0.06 |
| E2 | GY   | 5A | AX.89413692 | 3.82E+08 | 0.08 | -3.57   | 3.17 | 0.06 |
| E2 | GY   | 5A | AX.86184719 | 4.74E+08 | 0.07 | -4.00   | 3.45 | 0.05 |
| E2 | GY   | 5A | AX.86184719 | 4.74E+08 | 0.07 | -4.00   | 3.45 | 0.05 |
| E2 | GY   | 5A | AX.89736061 | 5.49E+08 | 0.11 | -3.44   | 3.74 | 0.07 |
| E2 | GY   | 5A | AX.89736061 | 5.49E+08 | 0.11 | -3.44   | 3.74 | 0.07 |
| E2 | GY   | 5A | AX.89736747 | 3.82E+08 | 0.08 | -3.57   | 3.17 | 0.06 |
| E2 | GY   | 5A | AX.89736747 | 3.82E+08 | 0.08 | -3.57   | 3.17 | 0.06 |
| E2 | GY   | 5A | AX.89510352 | 3.80E+08 | 0.08 | -3.57   | 3.17 | 0.06 |
| E2 | GY   | 5A | AX.89510352 | 3.80E+08 | 0.08 | -3.57   | 3.17 | 0.06 |
| E2 | GY   | 5A | AX.89738855 | 3.81E+08 | 0.08 | -3.57   | 3.17 | 0.06 |
| E2 | GY   | 5A | AX.89738855 | 3.81E+08 | 0.08 | -3.57   | 3.17 | 0.06 |
| E2 | GY   | 5A | AX.89312466 | 5.65E+08 | 0.10 | -3.19   | 3.01 | 0.04 |
| E2 | GY   | 5A | AX.89312466 | 5.65E+08 | 0.10 | -3.19   | 3.01 | 0.04 |
| E2 | GY   | 5A | AX.89776986 | 5.49E+08 | 0.10 | -3.24   | 3.28 | 0.07 |
| E2 | GY   | 5A | AX.89776986 | 5.49E+08 | 0.10 | -3.24   | 3.28 | 0.07 |
| E2 | GY   | 5A | AX.89703618 | 4.55E+08 | 0.06 | -4.65   | 3.73 | 0.06 |
| E2 | GY   | 5A | AX.89703618 | 4.55E+08 | 0.06 | -4.65   | 3.73 | 0.06 |
| E2 | GPM2 | 5A | AX.89440555 | 5.91E+08 | 0.28 | 543.62  | 3.11 | 0.06 |
| E2 | GY   | 5A | AX.89740114 | 4.72E+08 | 0.07 | -5.65   | 6.01 | 0.10 |
| E2 | GY   | 5A | AX.89740114 | 4.72E+08 | 0.07 | -5.65   | 6.01 | 0.10 |
| E2 | GY   | 5A | AX.89712955 | 4.73E+08 | 0.08 | -3.71   | 3.34 | 0.05 |
| E2 | GY   | 5A | AX.89712955 | 4.73E+08 | 0.08 | -3.71   | 3.34 | 0.05 |
| E2 | GY   | 5A | AX.89418657 | 4.73E+08 | 0.08 | -3.71   | 3.34 | 0.05 |
| E2 | GY   | 5A | AX.89418657 | 4.73E+08 | 0.08 | -3.71   | 3.34 | 0.05 |
| E2 | GY   | 5A | AX.89453773 | 5.68E+08 | 0.06 | -4.28   | 3.32 | 0.04 |
| E2 | GY   | 5A | AX.89453773 | 5.68E+08 | 0.06 | -4.28   | 3.32 | 0.04 |
| E2 | GY   | 5A | AX.89431791 | 5.49E+08 | 0.10 | -3.19   | 3.07 | 0.06 |
| E2 | GY   | 5A | AX.89386393 | 3.82E+08 | 0.07 | -3.90   | 3.34 | 0.04 |
| E2 | GY   | 5A | AX.89386393 | 3.82E+08 | 0.07 | -3.90   | 3.34 | 0.04 |
| E2 | GY   | 5A | AX.89434678 | 4.73E+08 | 0.08 | -3.71   | 3.34 | 0.05 |
| E2 | GY   | 5A | AX.89434678 | 4.73E+08 | 0.08 | -3.71   | 3.34 | 0.05 |
| E2 | GPM2 | 5A | AX.89566557 | 3.92E+08 | 0.18 | -719.55 | 3.80 | 0.07 |
| E2 | GY   | 5A | AX.89775045 | 1.93E+07 | 0.15 | -2.81   | 3.43 | 0.06 |
| E2 | GY   | 5A | AX.89775045 | 1.93E+07 | 0.15 | -2.81   | 3.43 | 0.06 |
| E2 | GY   | 5A | AX.89682075 | 4.76E+08 | 0.05 | -5.53   | 4.73 | 0.07 |
| E2 | GY   | 5A | AX.89682075 | 4.76E+08 | 0.05 | -5.53   | 4.73 | 0.07 |
| E2 | GY   | 5A | AX.89603939 | 3.79E+08 | 0.08 | -4.11   | 4.23 | 0.08 |

|    |      |    |             |          |      |         |      |      |
|----|------|----|-------------|----------|------|---------|------|------|
| E2 | GY   | 5A | AX.89603939 | 3.79E+08 | 0.08 | -4.11   | 4.23 | 0.08 |
| E2 | GY   | 5A | AX.89710892 | 6.66E+08 | 0.37 | -1.95   | 3.05 | 0.04 |
| E2 | GY   | 5A | AX.89710892 | 6.66E+08 | 0.37 | -1.95   | 3.05 | 0.04 |
| E2 | GY   | 5A | AX.89605507 | 6.66E+08 | 0.39 | -1.98   | 3.17 | 0.04 |
| E2 | GY   | 5A | AX.89605507 | 6.66E+08 | 0.39 | -1.98   | 3.17 | 0.04 |
| E2 | GY   | 5A | AX.89546156 | 4.75E+08 | 0.05 | -5.53   | 4.73 | 0.07 |
| E2 | GY   | 5A | AX.89395291 | 3.82E+08 | 0.08 | -3.57   | 3.17 | 0.06 |
| E2 | GY   | 5A | AX.89395291 | 3.82E+08 | 0.08 | -3.57   | 3.17 | 0.06 |
| E2 | GY   | 5A | AX.89431791 | 5.49E+08 | 0.10 | -3.19   | 3.07 | 0.06 |
| E2 | GY   | 5A | AX.89396437 | 3.66E+08 | 0.08 | -4.11   | 4.01 | 0.08 |
| E2 | GY   | 5A | AX.89396437 | 3.66E+08 | 0.08 | -4.11   | 4.01 | 0.08 |
| E2 | GY   | 5A | AX.89490823 | 3.68E+08 | 0.09 | -4.50   | 5.15 | 0.10 |
| E2 | GY   | 5A | AX.89490823 | 3.68E+08 | 0.09 | -4.50   | 5.15 | 0.10 |
| E2 | GY   | 5A | AX.89361677 | 4.74E+08 | 0.07 | -3.79   | 3.31 | 0.05 |
| E2 | GY   | 5A | AX.89361677 | 4.74E+08 | 0.07 | -3.79   | 3.31 | 0.05 |
| E2 | GY   | 5A | AX.89613013 | 4.73E+08 | 0.08 | -3.60   | 3.18 | 0.04 |
| E2 | GY   | 5A | AX.89371970 | 3.68E+08 | 0.09 | -4.50   | 5.15 | 0.10 |
| E2 | GY   | 5A | AX.89371970 | 3.68E+08 | 0.09 | -4.50   | 5.15 | 0.10 |
| E2 | GY   | 5A | AX.89741234 | 3.81E+08 | 0.08 | -3.57   | 3.17 | 0.06 |
| E2 | GY   | 5A | AX.89518533 | 5.68E+08 | 0.06 | -4.28   | 3.32 | 0.04 |
| E2 | GPM2 | 5A | AX.89328022 | 7.09E+08 | 0.30 | -577.44 | 3.50 | 0.07 |
| E2 | GY   | 5A | AX.89330863 | 3.81E+08 | 0.08 | -3.57   | 3.17 | 0.06 |
| E2 | GY   | 5A | AX.89699280 | 5.49E+08 | 0.10 | -3.19   | 3.07 | 0.06 |
| E2 | GPM2 | 5A | AX.89744481 | 3.92E+08 | 0.18 | -719.55 | 3.80 | 0.07 |
| E2 | GY   | 5A | AX.89437997 | 3.69E+08 | 0.09 | -4.50   | 5.15 | 0.10 |
| E2 | GY   | 5A | AX.89332916 | 4.73E+08 | 0.08 | -3.71   | 3.34 | 0.05 |
| E2 | GY   | 5A | AX.89368511 | 5.49E+08 | 0.10 | -3.24   | 3.28 | 0.07 |
| E2 | GY   | 5A | AX.89368511 | 5.49E+08 | 0.10 | -3.24   | 3.28 | 0.07 |
| E2 | GPM2 | 5A | AX.89468532 | 5.91E+08 | 0.28 | 543.62  | 3.11 | 0.06 |
| E2 | GPM2 | 5A | AX.89694788 | 7.08E+08 | 0.21 | 594.72  | 3.03 | 0.06 |
| E2 | GPM2 | 5A | AX.89615359 | 3.92E+08 | 0.18 | -719.55 | 3.80 | 0.07 |
| E2 | GY   | 5A | AX.89439613 | 3.81E+08 | 0.08 | -3.57   | 3.17 | 0.06 |
| E2 | GY   | 5A | AX.89413159 | 5.49E+08 | 0.09 | -4.21   | 4.62 | 0.09 |
| E2 | GY   | 5A | AX.89714237 | 3.80E+08 | 0.08 | -3.57   | 3.17 | 0.06 |
| E2 | GY   | 5A | AX.89650222 | 4.74E+08 | 0.06 | -4.40   | 3.64 | 0.05 |
| E2 | GPM2 | 5A | AX.89722866 | 6.96E+08 | 0.24 | -584.81 | 3.25 | 0.05 |
| E2 | GY   | 5A | AX.89513709 | 4.74E+08 | 0.07 | -3.79   | 3.31 | 0.05 |
| E2 | GY   | 5A | AX.89560047 | 5.49E+08 | 0.10 | -3.19   | 3.07 | 0.06 |
| E2 | GPM2 | 5A | AX.89641527 | 3.92E+08 | 0.18 | -719.55 | 3.80 | 0.07 |
| E2 | GPM2 | 5A | AX.89438235 | 3.92E+08 | 0.18 | -719.55 | 3.80 | 0.07 |
| E2 | GY   | 5A | AX.89397690 | 3.80E+08 | 0.08 | -3.57   | 3.17 | 0.06 |
| E2 | GY   | 5A | AX.89561103 | 4.75E+08 | 0.06 | -4.56   | 3.63 | 0.05 |
| E2 | GY   | 5A | AX.89340846 | 5.49E+08 | 0.09 | -4.21   | 4.62 | 0.09 |
| E2 | GY   | 5A | AX.89340846 | 5.49E+08 | 0.09 | -4.21   | 4.62 | 0.09 |
| E2 | GPM2 | 5A | AX.89490507 | 3.92E+08 | 0.18 | -719.55 | 3.80 | 0.07 |
| E2 | GPM2 | 5A | AX.89428853 | 3.92E+08 | 0.18 | -719.55 | 3.80 | 0.07 |
| E2 | GY   | 5A | AX.89353357 | 4.75E+08 | 0.05 | -5.53   | 4.73 | 0.07 |
| E2 | GPM2 | 5A | AX.89552993 | 6.99E+08 | 0.31 | -660.32 | 4.48 | 0.09 |
| E2 | GY   | 5A | AX.89674761 | 4.74E+08 | 0.07 | -4.00   | 3.45 | 0.05 |
| E2 | GY   | 5A | AX.89694942 | 3.68E+08 | 0.08 | -4.11   | 4.01 | 0.08 |

|    |      |    |             |          |      |         |      |      |
|----|------|----|-------------|----------|------|---------|------|------|
| E2 | GY   | 5A | AX.89694942 | 3.68E+08 | 0.08 | -4.11   | 4.01 | 0.08 |
| E2 | GPM2 | 5A | AX.89709901 | 3.92E+08 | 0.18 | -719.55 | 3.80 | 0.07 |
| E2 | GY   | 5A | AX.89542560 | 4.73E+08 | 0.08 | -3.71   | 3.34 | 0.05 |
| E2 | GPM2 | 5A | AX.89589337 | 3.92E+08 | 0.18 | -719.55 | 3.80 | 0.07 |
| E2 | GPM2 | 5A | AX.89317782 | 3.92E+08 | 0.18 | -719.55 | 3.80 | 0.07 |
| E2 | GPM2 | 5A | AX.89668189 | 3.92E+08 | 0.19 | -666.41 | 3.45 | 0.06 |
| E2 | GY   | 5A | AX.89415710 | 4.72E+08 | 0.07 | -5.65   | 6.01 | 0.10 |
| E2 | GY   | 5A | AX.89415710 | 4.72E+08 | 0.07 | -5.65   | 6.01 | 0.10 |
| E2 | GY   | 5A | AX.89394142 | 4.72E+08 | 0.07 | -5.65   | 6.01 | 0.10 |
| E2 | GY   | 5A | AX.89476132 | 4.73E+08 | 0.08 | -3.71   | 3.34 | 0.05 |
| E2 | GY   | 5A | AX.89476132 | 4.73E+08 | 0.08 | -3.71   | 3.34 | 0.05 |
| E2 | GY   | 5A | AX.89630592 | 4.73E+08 | 0.08 | -3.71   | 3.34 | 0.05 |
| E2 | GY   | 5A | AX.89630592 | 4.73E+08 | 0.08 | -3.71   | 3.34 | 0.05 |
| E2 | GPM2 | 5A | AX.89536487 | 3.92E+08 | 0.18 | -719.55 | 3.80 | 0.07 |
| E2 | GY   | 5A | AX.89560047 | 5.49E+08 | 0.10 | -3.19   | 3.07 | 0.06 |
| E2 | GY   | 5A | AX.89576291 | 3.82E+08 | 0.08 | -3.57   | 3.17 | 0.06 |
| E2 | GY   | 5A | AX.89576291 | 3.82E+08 | 0.08 | -3.57   | 3.17 | 0.06 |
| E2 | GY   | 5A | AX.89599577 | 3.81E+08 | 0.08 | -3.57   | 3.17 | 0.06 |
| E2 | GY   | 5A | AX.89599577 | 3.81E+08 | 0.08 | -3.57   | 3.17 | 0.06 |
| E2 | GPM2 | 5A | AX.89621454 | 3.92E+08 | 0.18 | -719.55 | 3.80 | 0.07 |
| E2 | GY   | 5A | AX.89672548 | 3.82E+08 | 0.07 | -3.71   | 3.22 | 0.06 |
| E2 | GY   | 5A | AX.89672548 | 3.82E+08 | 0.07 | -3.71   | 3.22 | 0.06 |
| E2 | GY   | 5A | AX.89353357 | 4.75E+08 | 0.05 | -5.53   | 4.73 | 0.07 |
| E2 | GY   | 5A | AX.89774371 | 4.74E+08 | 0.07 | -3.79   | 3.31 | 0.05 |
| E2 | GY   | 5A | AX.89674761 | 4.74E+08 | 0.07 | -4.00   | 3.45 | 0.05 |
| E2 | GPM2 | 5A | AX.89490699 | 3.92E+08 | 0.18 | -719.55 | 3.80 | 0.07 |
| E2 | GPM2 | 5A | AX.89563433 | 5.91E+08 | 0.28 | 543.62  | 3.11 | 0.06 |
| E2 | GY   | 5A | AX.89542560 | 4.73E+08 | 0.08 | -3.71   | 3.34 | 0.05 |
| E2 | GY   | 5A | AX.89621656 | 4.73E+08 | 0.08 | -3.71   | 3.34 | 0.05 |
| E2 | GY   | 5A | AX.89621656 | 4.73E+08 | 0.08 | -3.71   | 3.34 | 0.05 |
| E2 | GPM2 | 5A | AX.89482956 | 6.99E+08 | 0.31 | -660.32 | 4.48 | 0.09 |
| E2 | GY   | 5A | AX.89394142 | 4.72E+08 | 0.07 | -5.65   | 6.01 | 0.10 |
| E2 | GPM2 | 5A | AX.89331314 | 3.92E+08 | 0.18 | -719.55 | 3.80 | 0.07 |
| E2 | GY   | 5A | AX.89361971 | 4.73E+08 | 0.07 | -3.89   | 3.47 | 0.05 |
| E2 | GY   | 5A | AX.89361971 | 4.73E+08 | 0.07 | -3.89   | 3.47 | 0.05 |
| E2 | GPM2 | 5A | AX.89378056 | 3.92E+08 | 0.18 | -719.55 | 3.80 | 0.07 |
| E2 | GY   | 5A | AX.89699280 | 5.49E+08 | 0.10 | -3.19   | 3.07 | 0.06 |
| E2 | GPM2 | 5A | AX.89736562 | 3.91E+08 | 0.18 | -719.55 | 3.80 | 0.07 |
| E2 | GPM2 | 5A | AX.89699298 | 6.94E+08 | 0.24 | -607.79 | 3.42 | 0.06 |
| E2 | GY   | 5A | AX.89774371 | 4.74E+08 | 0.07 | -3.79   | 3.31 | 0.05 |
| E2 | GPM2 | 5A | AX.89562008 | 5.91E+08 | 0.28 | 543.62  | 3.11 | 0.06 |
| E2 | GPM2 | 5A | AX.89549497 | 7.00E+08 | 0.29 | -531.05 | 3.03 | 0.05 |
| E2 | GPM2 | 5A | AX.89678214 | 3.92E+08 | 0.18 | -719.55 | 3.80 | 0.07 |
| E2 | GPM2 | 5A | AX.89486573 | 3.92E+08 | 0.18 | -719.55 | 3.80 | 0.07 |
| E2 | GPM2 | 5A | AX.89588551 | 5.91E+08 | 0.28 | 543.62  | 3.11 | 0.06 |
| E2 | GPM2 | 5A | AX.89716248 | 6.94E+08 | 0.24 | -584.81 | 3.25 | 0.05 |
| E2 | GPM2 | 5A | AX.89648813 | 6.99E+08 | 0.30 | -602.10 | 3.79 | 0.07 |
| E2 | GPM2 | 5A | AX.89318849 | 5.91E+08 | 0.28 | 543.62  | 3.11 | 0.06 |
| E2 | GY   | 5A | AX.89519811 | 3.77E+08 | 0.08 | -4.11   | 4.01 | 0.08 |
| E2 | GY   | 5A | AX.89519811 | 3.77E+08 | 0.08 | -4.11   | 4.01 | 0.08 |

|    |      |    |               |          |      |          |      |      |
|----|------|----|---------------|----------|------|----------|------|------|
| E2 | GY   | 5A | AX.89585803   | 3.82E+08 | 0.08 | -3.57    | 3.17 | 0.06 |
| E2 | GY   | 5A | AX.89585803   | 3.82E+08 | 0.08 | -3.57    | 3.17 | 0.06 |
| E2 | GPM2 | 5A | AX.89346281   | 5.91E+08 | 0.28 | 543.62   | 3.11 | 0.06 |
| E2 | GPM2 | 5A | AX.89419085   | 3.92E+08 | 0.18 | -719.55  | 3.80 | 0.07 |
| E2 | GY   | 5A | AX.89573776   | 3.43E+08 | 0.08 | -3.77    | 3.46 | 0.07 |
| E2 | GPM2 | 5A | AX.89340573   | 3.92E+08 | 0.18 | -719.55  | 3.80 | 0.07 |
| E2 | GPS  | 5A | AX.89564336   | 5.49E+08 | 0.48 | -1.38    | 3.28 | 0.06 |
| E2 | GPM2 | 5A | AX.89410951   | 3.92E+08 | 0.18 | -719.55  | 3.80 | 0.07 |
| E2 | GPM2 | 5A | AX.89378760   | 3.92E+08 | 0.18 | -719.55  | 3.80 | 0.07 |
| E2 | GY   | 5A | AX.89573776   | 3.43E+08 | 0.08 | -3.77    | 3.46 | 0.07 |
| E2 | GPM2 | 5A | AX.89572135   | 6.99E+08 | 0.30 | -602.10  | 3.79 | 0.07 |
| E2 | GPM2 | 5A | AX.89554323   | 3.92E+08 | 0.18 | -719.55  | 3.80 | 0.07 |
| E2 | GPM2 | 5A | AX.89498534   | 3.92E+08 | 0.18 | -719.55  | 3.80 | 0.07 |
| E2 | GPM2 | 5A | AX.89703618   | 4.55E+08 | 0.06 | -1069.10 | 3.10 | 0.05 |
| E2 | GPM2 | 5A | AX.89750176   | 3.92E+08 | 0.18 | -687.00  | 3.58 | 0.07 |
| E2 | GPM2 | 5A | AX.89325026   | 3.92E+08 | 0.18 | -719.55  | 3.80 | 0.07 |
| E2 | GPM2 | 5A | AX.89543907   | 6.94E+08 | 0.25 | -623.48  | 3.72 | 0.06 |
| E3 | GPM2 | 5A | AX.89661920   | 4.49E+08 | 0.14 | -1360.77 | 3.72 | 0.02 |
| E3 | GPM2 | 5A | AX.89760616   | 4.49E+08 | 0.14 | -1423.43 | 3.95 | 0.02 |
| E3 | GPM2 | 5A | AX.89617171   | 4.49E+08 | 0.15 | -1414.30 | 4.04 | 0.03 |
| E3 | GPM2 | 5A | AX.89711415   | 4.49E+08 | 0.14 | -1392.65 | 3.91 | 0.02 |
| E3 | GPM2 | 5A | AX.89358661   | 4.50E+08 | 0.14 | -1340.72 | 3.60 | 0.02 |
| E3 | GPM2 | 5A | AX.89757084   | 5.21E+08 | 0.28 | 1092.61  | 3.48 | 0.11 |
| E3 | GPM2 | 5A | AX.89563032   | 6.63E+08 | 0.11 | -1341.26 | 3.07 | 0.02 |
| E3 | GPS  | 5A | AX.89773683   | 6.76E+08 | 0.10 | 3.25     | 3.32 | 0.07 |
| E3 | GY   | 5A | AX.89617171   | 4.49E+08 | 0.15 | -4.00    | 3.04 | 0.02 |
| E3 | GY   | 5A | AX.89711415   | 4.49E+08 | 0.14 | -4.07    | 3.10 | 0.02 |
| E3 | GY   | 5A | AX.89406770   | 4.55E+08 | 0.09 | -5.02    | 3.22 | 0.04 |
| E3 | GY   | 5A | AX.89714529   | 4.55E+08 | 0.08 | -4.98    | 3.11 | 0.03 |
| E3 | GY   | 5A | X.89671700_OT | 4.71E+08 | 0.14 | 4.01     | 3.37 | 0.05 |
| E3 | GY   | 5A | X.89317841_OT | 4.71E+08 | 0.12 | 4.28     | 3.41 | 0.05 |
| E3 | GY   | 5A | AX.89380043   | 4.71E+08 | 0.09 | 4.56     | 3.02 | 0.04 |
| E3 | GY   | 5A | AX.89757084   | 5.21E+08 | 0.28 | 3.34     | 3.00 | 0.09 |
| E3 | GY   | 5A | AX.89373913   | 5.36E+08 | 0.07 | -6.08    | 3.63 | 0.06 |
| E3 | GY   | 5A | AX.89563032   | 6.63E+08 | 0.11 | -4.63    | 3.27 | 0.02 |
| E3 | GY   | 5A | AX.89679169   | 6.86E+08 | 0.05 | 6.10     | 3.01 | 0.05 |
| E3 | SPM2 | 5A | AX.89536153   | 1.31E+06 | 0.34 | 21.24    | 3.01 | 0.03 |
| E3 | SPM2 | 5A | AX.89450454   | 1.34E+06 | 0.17 | 27.34    | 3.43 | 0.07 |
| E3 | TKW  | 5A | AX.89547274   | 6.69E+05 | 0.15 | -1.11    | 3.00 | 0.08 |
| E3 | TKW  | 5A | AX.89680071   | 1.23E+06 | 0.19 | -1.07    | 3.31 | 0.06 |
| E3 | TKW  | 5A | AX.89661507   | 5.49E+08 | 0.47 | 0.84     | 3.06 | 0.00 |
| E3 | TKW  | 5A | AX.89491020   | 5.49E+08 | 0.46 | 0.85     | 3.18 | 0.00 |
| E3 | TKW  | 5A | AX.89530506   | 5.49E+08 | 0.46 | 0.85     | 3.18 | 0.00 |
| E4 | GPM2 | 5A | AX.89699188   | 5.92E+08 | 0.08 | -807.62  | 3.33 | 0.04 |
| E4 | GPM2 | 5A | AX.89709891   | 5.93E+08 | 0.08 | -798.50  | 3.13 | 0.04 |
| E4 | GPM2 | 5A | AX.89473061   | 5.92E+08 | 0.17 | -597.66  | 3.00 | 0.05 |
| E4 | GPM2 | 5A | AX.89578773   | 5.93E+08 | 0.08 | -798.50  | 3.13 | 0.04 |
| E4 | GPM2 | 5A | AX.89551875   | 5.93E+08 | 0.08 | -798.50  | 3.13 | 0.04 |
| E4 | GPM2 | 5A | AX.89349516   | 5.92E+08 | 0.08 | -807.62  | 3.33 | 0.04 |
| E4 | GPM2 | 5A | AX.89589500   | 5.92E+08 | 0.08 | -807.62  | 3.33 | 0.04 |

|    |      |    |             |          |      |         |      |      |
|----|------|----|-------------|----------|------|---------|------|------|
| E4 | GPM2 | 5A | AX.89544655 | 5.92E+08 | 0.08 | -807.62 | 3.33 | 0.04 |
| E4 | GPM2 | 5A | AX.89546901 | 5.93E+08 | 0.08 | -798.50 | 3.13 | 0.04 |
| E4 | GPM2 | 5A | AX.89522733 | 5.93E+08 | 0.08 | -903.67 | 3.68 | 0.05 |
| E4 | GPM2 | 5A | AX.89330508 | 5.93E+08 | 0.08 | -798.50 | 3.13 | 0.04 |
| E4 | GPM2 | 5A | AX.89401724 | 5.92E+08 | 0.08 | -807.62 | 3.33 | 0.04 |
| E4 | GPM2 | 5A | AX.89524839 | 5.93E+08 | 0.08 | -903.67 | 3.68 | 0.05 |
| E4 | GPM2 | 5A | AX.89489270 | 5.93E+08 | 0.08 | -903.67 | 3.68 | 0.05 |
| E4 | GPM2 | 5A | AX.89462533 | 5.92E+08 | 0.08 | -825.52 | 3.36 | 0.05 |
| E4 | GPM2 | 5A | AX.89321652 | 5.92E+08 | 0.08 | -807.62 | 3.33 | 0.04 |
| E4 | GPM2 | 5A | AX.89478035 | 5.92E+08 | 0.08 | -843.80 | 3.33 | 0.04 |
| E4 | GPM2 | 5A | AX.89658872 | 5.92E+08 | 0.08 | -807.62 | 3.33 | 0.04 |
| E4 | GPM2 | 5A | AX.89752642 | 5.92E+08 | 0.08 | -807.62 | 3.33 | 0.04 |
| E4 | GPM2 | 5A | AX.89507566 | 5.93E+08 | 0.08 | -807.62 | 3.33 | 0.04 |
| E4 | GPM2 | 5A | AX.89717890 | 5.93E+08 | 0.08 | -807.62 | 3.33 | 0.04 |
| E4 | GPM2 | 5A | AX.89502057 | 5.93E+08 | 0.08 | -868.44 | 3.48 | 0.05 |
| E4 | GPM2 | 5A | AX.89681189 | 5.93E+08 | 0.08 | -798.50 | 3.13 | 0.04 |
| E4 | GPM2 | 5A | AX.89358620 | 5.93E+08 | 0.08 | -798.50 | 3.13 | 0.04 |
| E4 | GPM2 | 5A | AX.89398585 | 5.92E+08 | 0.08 | -843.32 | 3.28 | 0.05 |
| E4 | GPM2 | 5A | AX.89421365 | 5.92E+08 | 0.09 | -791.91 | 3.54 | 0.05 |
| E4 | GPM2 | 5A | AX.89431839 | 5.93E+08 | 0.08 | -798.50 | 3.13 | 0.04 |
| E4 | GPM2 | 5A | AX.89763927 | 5.93E+08 | 0.08 | -903.67 | 3.68 | 0.05 |
| E4 | GPM2 | 5A | AX.89735430 | 5.93E+08 | 0.08 | -903.67 | 3.68 | 0.05 |
| E4 | GPM2 | 5A | AX.89622712 | 5.93E+08 | 0.08 | -903.67 | 3.68 | 0.05 |
| E4 | GPM2 | 5A | AX.89564282 | 5.95E+08 | 0.33 | -470.07 | 3.20 | 0.05 |
| E4 | GPM2 | 5A | AX.89652899 | 5.92E+08 | 0.08 | -847.22 | 3.22 | 0.05 |
| E4 | GPM2 | 5A | AX.89486445 | 5.92E+08 | 0.07 | -839.38 | 3.05 | 0.04 |
| E4 | GPM2 | 5A | AX.89680165 | 5.92E+08 | 0.08 | -807.62 | 3.33 | 0.04 |
| E4 | GPM2 | 5A | AX.89729633 | 5.92E+08 | 0.08 | -807.62 | 3.33 | 0.04 |
| E4 | GPM2 | 5A | AX.89736080 | 5.92E+08 | 0.08 | -807.62 | 3.33 | 0.04 |
| E4 | GPM2 | 5A | AX.89738574 | 5.92E+08 | 0.08 | -807.62 | 3.33 | 0.04 |
| E4 | GPM2 | 5A | AX.89682323 | 5.92E+08 | 0.08 | -807.62 | 3.33 | 0.04 |
| E4 | GPM2 | 5A | AX.89604407 | 5.92E+08 | 0.09 | -784.22 | 3.26 | 0.04 |
| E4 | GPM2 | 5A | AX.89736516 | 5.92E+08 | 0.08 | -807.62 | 3.33 | 0.04 |
| E4 | GPM2 | 5A | AX.89687552 | 5.91E+08 | 0.17 | -618.12 | 3.28 | 0.06 |
| E4 | GPM2 | 5A | AX.89554510 | 5.91E+08 | 0.17 | -612.39 | 3.13 | 0.05 |
| E4 | GPM2 | 5A | AX.89527897 | 5.91E+08 | 0.17 | -618.12 | 3.28 | 0.06 |
| E4 | GPM2 | 5A | AX.89537171 | 5.91E+08 | 0.17 | -629.99 | 3.34 | 0.06 |
| E4 | GPM2 | 5A | AX.89606663 | 3.81E+07 | 0.23 | -531.52 | 3.10 | 0.03 |
| E4 | GPM2 | 5A | AX.89454674 | 2.95E+08 | 0.16 | 600.64  | 3.12 | 0.07 |
| E4 | GPM2 | 5A | AX.89570321 | 3.09E+08 | 0.16 | 628.19  | 3.23 | 0.07 |
| E4 | GPM2 | 5A | AX.89522473 | 5.12E+08 | 0.10 | -739.04 | 3.31 | 0.03 |
| E4 | GPM2 | 5A | AX.89776907 | 5.91E+08 | 0.07 | -984.18 | 3.99 | 0.06 |
| E4 | GPM2 | 5A | AX.89654141 | 5.91E+08 | 0.08 | -810.93 | 3.24 | 0.04 |
| E4 | GPM2 | 5A | AX.89654699 | 5.91E+08 | 0.08 | -810.93 | 3.24 | 0.04 |
| E4 | GPM2 | 5A | AX.89313176 | 5.91E+08 | 0.08 | -810.93 | 3.24 | 0.04 |
| E4 | GPM2 | 5A | AX.89550470 | 5.91E+08 | 0.07 | -984.18 | 3.99 | 0.06 |
| E4 | GPM2 | 5A | AX.89604111 | 5.91E+08 | 0.07 | -984.18 | 3.99 | 0.06 |
| E4 | GPM2 | 5A | AX.89522203 | 5.91E+08 | 0.08 | -829.76 | 3.27 | 0.04 |
| E4 | GY   | 5A | AX.89529513 | 5.92E+08 | 0.18 | -2.22   | 3.77 | 0.06 |
| E4 | GY   | 5A | AX.89570517 | 5.92E+08 | 0.18 | -2.22   | 3.77 | 0.06 |

|    |    |    |             |          |      |       |      |      |
|----|----|----|-------------|----------|------|-------|------|------|
| E4 | GY | 5A | AX.89609993 | 5.92E+08 | 0.18 | -2.22 | 3.77 | 0.06 |
| E4 | GY | 5A | AX.89343248 | 5.92E+08 | 0.18 | -2.23 | 3.88 | 0.06 |
| E4 | GY | 5A | AX.89607657 | 5.92E+08 | 0.18 | -2.23 | 3.88 | 0.06 |
| E4 | GY | 5A | AX.89744976 | 5.92E+08 | 0.18 | -2.19 | 3.83 | 0.06 |
| E4 | GY | 5A | AX.89332451 | 5.93E+08 | 0.18 | -2.23 | 3.88 | 0.06 |
| E4 | GY | 5A | AX.89564282 | 5.95E+08 | 0.33 | -1.66 | 3.47 | 0.05 |
| E4 | GY | 5A | AX.89730631 | 6.81E+08 | 0.24 | -1.79 | 3.26 | 0.05 |
| E4 | GY | 5A | AX.89669520 | 6.81E+08 | 0.24 | -1.74 | 3.12 | 0.05 |
| E4 | GY | 5A | AX.89615829 | 6.82E+08 | 0.24 | -1.79 | 3.26 | 0.05 |
| E4 | GY | 5A | AX.89591696 | 6.82E+08 | 0.24 | -1.74 | 3.12 | 0.05 |
| E4 | GY | 5A | AX.89399967 | 6.82E+08 | 0.24 | -1.77 | 3.19 | 0.05 |
| E4 | GY | 5A | AX.89323718 | 6.82E+08 | 0.24 | -1.79 | 3.26 | 0.05 |
| E4 | GY | 5A | AX.89353663 | 6.82E+08 | 0.24 | -1.79 | 3.26 | 0.05 |
| E4 | GY | 5A | AX.89492854 | 6.82E+08 | 0.24 | -1.79 | 3.26 | 0.05 |
| E4 | GY | 5A | AX.89726154 | 6.83E+08 | 0.24 | -1.79 | 3.26 | 0.05 |
| E4 | GY | 5A | AX.89315375 | 6.83E+08 | 0.24 | -1.85 | 3.43 | 0.05 |
| E4 | GY | 5A | AX.89677477 | 6.83E+08 | 0.24 | -1.74 | 3.12 | 0.05 |
| E4 | GY | 5A | AX.89665828 | 6.83E+08 | 0.25 | -1.79 | 3.38 | 0.05 |
| E4 | GY | 5A | AX.89478190 | 6.83E+08 | 0.25 | -1.73 | 3.17 | 0.05 |
| E4 | GY | 5A | AX.89767529 | 6.83E+08 | 0.29 | -1.60 | 3.03 | 0.04 |
| E4 | GY | 5A | AX.89376560 | 5.92E+08 | 0.17 | -2.26 | 3.89 | 0.06 |
| E4 | GY | 5A | AX.89592042 | 5.92E+08 | 0.17 | -2.26 | 3.89 | 0.06 |
| E4 | GY | 5A | AX.89340018 | 5.92E+08 | 0.17 | -2.26 | 3.89 | 0.06 |
| E4 | GY | 5A | AX.89601577 | 5.92E+08 | 0.17 | -2.26 | 3.89 | 0.06 |
| E4 | GY | 5A | AX.89738281 | 5.92E+08 | 0.20 | -2.15 | 3.93 | 0.06 |
| E4 | GY | 5A | AX.89733618 | 5.92E+08 | 0.18 | -2.23 | 3.88 | 0.06 |
| E4 | GY | 5A | AX.89399161 | 5.92E+08 | 0.18 | -2.03 | 3.36 | 0.05 |
| E4 | GY | 5A | AX.89425333 | 5.92E+08 | 0.18 | -2.23 | 3.88 | 0.06 |
| E4 | GY | 5A | AX.89366839 | 2.09E+06 | 0.12 | -2.32 | 3.11 | 0.05 |
| E4 | GY | 5A | AX.89687552 | 5.91E+08 | 0.17 | -2.42 | 4.26 | 0.07 |
| E4 | GY | 5A | AX.89554510 | 5.91E+08 | 0.17 | -2.42 | 4.17 | 0.07 |
| E4 | GY | 5A | AX.89527897 | 5.91E+08 | 0.17 | -2.42 | 4.26 | 0.07 |
| E4 | GY | 5A | AX.89537171 | 5.91E+08 | 0.17 | -2.45 | 4.32 | 0.07 |
| E4 | GY | 5A | AX.89549846 | 5.91E+08 | 0.18 | -2.23 | 3.87 | 0.06 |
| E4 | GY | 5A | AX.89450449 | 5.91E+08 | 0.18 | -2.23 | 3.87 | 0.06 |
| E4 | GY | 5A | AX.89491555 | 5.92E+08 | 0.18 | -2.22 | 3.77 | 0.06 |
| E4 | GY | 5A | AX.89501141 | 5.92E+08 | 0.18 | -2.22 | 3.77 | 0.06 |
| E4 | GY | 5A | AX.89547739 | 5.92E+08 | 0.17 | -1.98 | 3.06 | 0.05 |
| E4 | GY | 5A | AX.89659132 | 5.92E+08 | 0.18 | -2.22 | 3.77 | 0.06 |
| E4 | GY | 5A | AX.89394192 | 5.92E+08 | 0.18 | -2.22 | 3.77 | 0.06 |
| E4 | GY | 5A | AX.89324893 | 5.92E+08 | 0.18 | -2.22 | 3.77 | 0.06 |
| E4 | GY | 5A | AX.89727386 | 5.92E+08 | 0.18 | -2.22 | 3.77 | 0.06 |
| E4 | GY | 5A | AX.89727760 | 5.92E+08 | 0.18 | -2.23 | 3.88 | 0.06 |
| E4 | GY | 5A | AX.89339102 | 5.92E+08 | 0.18 | -2.23 | 3.88 | 0.06 |
| E4 | GY | 5A | AX.89499595 | 5.92E+08 | 0.18 | -2.23 | 3.88 | 0.06 |
| E4 | GY | 5A | AX.89632277 | 5.92E+08 | 0.18 | -2.23 | 3.88 | 0.06 |
| E4 | GY | 5A | AX.89712525 | 5.92E+08 | 0.18 | -2.23 | 3.88 | 0.06 |
| E4 | GY | 5A | AX.89513782 | 5.92E+08 | 0.18 | -2.23 | 3.88 | 0.06 |
| E4 | GY | 5A | AX.89473061 | 5.92E+08 | 0.17 | -2.47 | 4.31 | 0.07 |
| E4 | GY | 5A | AX.89596583 | 5.92E+08 | 0.18 | -2.23 | 3.88 | 0.06 |

|    |      |    |               |          |      |        |      |      |
|----|------|----|---------------|----------|------|--------|------|------|
| E4 | GY   | 5A | AX.89547534   | 5.92E+08 | 0.18 | -2.23  | 3.88 | 0.06 |
| E4 | GY   | 5A | AX.89401313   | 5.92E+08 | 0.18 | -2.23  | 3.88 | 0.06 |
| E4 | GY   | 5A | AX.89593804   | 5.92E+08 | 0.18 | -2.22  | 3.77 | 0.06 |
| E4 | GY   | 5A | AX.89590662   | 5.92E+08 | 0.18 | -2.23  | 3.88 | 0.06 |
| E4 | SPM2 | 5A | X.89551039_OT | 4.62E+08 | 0.32 | 17.92  | 3.15 | 0.06 |
| E4 | SPM2 | 5A | AX.89411487   | 4.73E+08 | 0.14 | 24.51  | 3.17 | 0.09 |
| E4 | TKW  | 5A | AX.89447572   | 5.49E+08 | 0.11 | 1.43   | 3.64 | 0.02 |
| E4 | TKW  | 5A | AX.89581028   | 5.49E+08 | 0.11 | 1.33   | 3.18 | 0.01 |
| E4 | TKW  | 5A | AX.89773652   | 5.49E+08 | 0.11 | 1.33   | 3.18 | 0.01 |
| E4 | TKW  | 5A | AX.89476088   | 6.80E+08 | 0.38 | -0.87  | 3.18 | 0.04 |
| E4 | TKW  | 5A | AX.89473320   | 6.80E+08 | 0.38 | -0.87  | 3.18 | 0.04 |
| E4 | TKW  | 5A | AX.89510180   | 6.80E+08 | 0.37 | -0.86  | 3.05 | 0.04 |
| E4 | TKW  | 5A | AX.89683744   | 6.80E+08 | 0.39 | -0.86  | 3.07 | 0.05 |
| E4 | TKW  | 5A | AX.89325805   | 6.80E+08 | 0.42 | -0.85  | 3.06 | 0.05 |
| E1 | GY   | 5B | AX.89383487   | 6.43E+08 | 0.11 | -3.67  | 3.08 | 0.05 |
| E1 | SPM2 | 5B | AX.89454031   | 1.32E+07 | 0.30 | -19.51 | 3.58 | 0.06 |
| E1 | GY   | 5B | AX.89545878   | 6.35E+08 | 0.27 | 3.03   | 4.09 | 0.06 |
| E1 | GY   | 5B | AX.89545878   | 6.35E+08 | 0.27 | 3.03   | 4.09 | 0.06 |
| E1 | GY   | 5B | AX.89342676   | 6.30E+08 | 0.23 | 2.90   | 3.51 | 0.06 |
| E1 | GY   | 5B | AX.89573412   | 6.36E+08 | 0.34 | 2.45   | 3.19 | 0.05 |
| E1 | GY   | 5B | AX.89554094   | 5.87E+08 | 0.31 | 2.47   | 3.09 | 0.04 |
| E1 | GY   | 5B | AX.89673663   | 6.36E+08 | 0.34 | 2.45   | 3.19 | 0.05 |
| E1 | GY   | 5B | AX.89437644   | 4.89E+08 | 0.05 | -5.21  | 3.13 | 0.05 |
| E1 | GY   | 5B | AX.89335298   | 6.34E+08 | 0.28 | 2.62   | 3.28 | 0.05 |
| E1 | GY   | 5B | AX.86167810   | 5.81E+08 | 0.24 | 2.67   | 3.12 | 0.03 |
| E1 | GY   | 5B | AX.89760671   | 5.86E+08 | 0.33 | 2.51   | 3.29 | 0.04 |
| E1 | GY   | 5B | AX.89309378   | 5.88E+08 | 0.27 | -2.66  | 3.31 | 0.06 |
| E1 | GY   | 5B | AX.89480538   | 6.34E+08 | 0.28 | 2.62   | 3.28 | 0.05 |
| E1 | GY   | 5B | AX.86167810   | 5.81E+08 | 0.24 | 2.67   | 3.12 | 0.03 |
| E1 | GY   | 5B | AX.89448319   | 6.37E+08 | 0.30 | 2.94   | 4.14 | 0.06 |
| E1 | GY   | 5B | AX.89390545   | 5.59E+08 | 0.28 | 2.61   | 3.27 | 0.05 |
| E1 | SPM2 | 5B | AX.89748868   | 1.32E+07 | 0.32 | -17.72 | 3.14 | 0.05 |
| E1 | GY   | 5B | AX.89357083   | 6.21E+08 | 0.24 | 2.99   | 3.74 | 0.07 |
| E1 | GY   | 5B | AX.89380715   | 6.93E+08 | 0.24 | -2.85  | 3.48 | 0.06 |
| E1 | GY   | 5B | AX.89668374   | 3.15E+08 | 0.21 | -3.74  | 5.12 | 0.08 |
| E1 | GY   | 5B | AX.89458043   | 5.38E+08 | 0.08 | 4.16   | 3.15 | 0.05 |
| E1 | GY   | 5B | AX.89685979   | 6.32E+08 | 0.27 | 2.74   | 3.46 | 0.06 |
| E1 | GY   | 5B | AX.89624706   | 6.34E+08 | 0.28 | 2.62   | 3.28 | 0.05 |
| E1 | GY   | 5B | AX.89325031   | 1.98E+07 | 0.18 | -3.25  | 3.58 | 0.05 |
| E1 | GY   | 5B | AX.89419340   | 6.43E+08 | 0.11 | -3.72  | 3.15 | 0.05 |
| E1 | GY   | 5B | AX.89523813   | 6.37E+08 | 0.13 | 3.68   | 3.66 | 0.06 |
| E1 | GY   | 5B | AX.89357028   | 2.00E+07 | 0.18 | -3.25  | 3.58 | 0.05 |
| E1 | GY   | 5B | AX.89380715   | 6.93E+08 | 0.24 | -2.85  | 3.48 | 0.06 |
| E1 | GY   | 5B | AX.89471949   | 1.95E+07 | 0.18 | -3.25  | 3.58 | 0.05 |
| E1 | GY   | 5B | AX.89627311   | 4.67E+08 | 0.20 | -2.95  | 3.23 | 0.06 |
| E1 | GY   | 5B | AX.89624258   | 6.43E+08 | 0.11 | -3.67  | 3.08 | 0.05 |
| E1 | GY   | 5B | AX.89760671   | 5.86E+08 | 0.33 | 2.51   | 3.29 | 0.04 |
| E1 | GY   | 5B | AX.89486250   | 6.43E+08 | 0.11 | -3.67  | 3.08 | 0.05 |
| E1 | GY   | 5B | AX.89370717   | 7.04E+08 | 0.28 | -2.76  | 3.61 | 0.06 |
| E1 | GY   | 5B | AX.89716468   | 6.43E+08 | 0.11 | -3.67  | 3.08 | 0.05 |

|    |      |    |             |          |      |        |      |      |
|----|------|----|-------------|----------|------|--------|------|------|
| E1 | GY   | 5B | AX.89588192 | 5.86E+08 | 0.35 | 2.61   | 3.62 | 0.05 |
| E1 | GY   | 5B | AX.89386836 | 5.87E+08 | 0.34 | 2.54   | 3.40 | 0.04 |
| E1 | GY   | 5B | AX.89607377 | 6.35E+08 | 0.28 | 2.62   | 3.28 | 0.05 |
| E1 | GY   | 5B | AX.89480538 | 6.34E+08 | 0.28 | 2.62   | 3.28 | 0.05 |
| E1 | GY   | 5B | AX.89389594 | 6.36E+08 | 0.34 | 2.45   | 3.19 | 0.05 |
| E1 | GY   | 5B | AX.89331656 | 6.32E+08 | 0.27 | 2.74   | 3.46 | 0.06 |
| E1 | GY   | 5B | AX.89627311 | 4.67E+08 | 0.20 | -2.95  | 3.23 | 0.06 |
| E1 | GY   | 5B | AX.89774767 | 6.37E+08 | 0.34 | 2.45   | 3.19 | 0.05 |
| E1 | GY   | 5B | AX.89340138 | 6.30E+08 | 0.23 | 2.90   | 3.51 | 0.06 |
| E1 | GY   | 5B | AX.89448752 | 6.37E+08 | 0.30 | 2.94   | 4.14 | 0.06 |
| E1 | GY   | 5B | AX.89371830 | 6.32E+08 | 0.27 | 2.74   | 3.46 | 0.06 |
| E1 | GY   | 5B | AX.89523813 | 6.37E+08 | 0.13 | 3.68   | 3.66 | 0.06 |
| E1 | GY   | 5B | AX.89410418 | 4.79E+08 | 0.05 | -5.21  | 3.14 | 0.05 |
| E1 | GY   | 5B | AX.89384466 | 6.36E+08 | 0.34 | 2.45   | 3.21 | 0.05 |
| E1 | GY   | 5B | AX.89384466 | 6.36E+08 | 0.34 | 2.45   | 3.21 | 0.05 |
| E1 | GY   | 5B | AX.89734081 | 7.13E+08 | 0.06 | -4.91  | 3.04 | 0.05 |
| E1 | GY   | 5B | AX.89600742 | 5.61E+08 | 0.25 | 2.66   | 3.15 | 0.05 |
| E1 | GY   | 5B | AX.89530183 | 4.80E+08 | 0.05 | -5.21  | 3.14 | 0.05 |
| E1 | GY   | 5B | AX.89702097 | 6.35E+08 | 0.28 | 2.62   | 3.28 | 0.05 |
| E1 | SPM2 | 5B | AX.89388779 | 1.32E+07 | 0.29 | -19.16 | 3.44 | 0.06 |
| E1 | GY   | 5B | AX.89746558 | 4.79E+08 | 0.05 | -5.21  | 3.14 | 0.05 |
| E1 | GY   | 5B | AX.89390545 | 5.59E+08 | 0.28 | 2.61   | 3.27 | 0.05 |
| E1 | GY   | 5B | AX.89389198 | 6.32E+08 | 0.23 | 2.82   | 3.31 | 0.06 |
| E1 | GY   | 5B | AX.89424748 | 1.13E+07 | 0.17 | -3.31  | 3.62 | 0.05 |
| E1 | GY   | 5B | AX.89448752 | 6.37E+08 | 0.30 | 2.94   | 4.14 | 0.06 |
| E1 | GY   | 5B | AX.89731133 | 6.35E+08 | 0.28 | 2.62   | 3.28 | 0.05 |
| E1 | GY   | 5B | AX.89385868 | 1.13E+07 | 0.17 | -3.31  | 3.62 | 0.05 |
| E1 | GY   | 5B | AX.89533286 | 5.87E+08 | 0.13 | -3.67  | 3.65 | 0.07 |
| E1 | GY   | 5B | AX.89335298 | 6.34E+08 | 0.28 | 2.62   | 3.28 | 0.05 |
| E1 | GY   | 5B | AX.89325031 | 1.98E+07 | 0.18 | -3.25  | 3.58 | 0.05 |
| E1 | GY   | 5B | AX.89395633 | 5.86E+08 | 0.33 | 2.54   | 3.37 | 0.04 |
| E1 | GY   | 5B | AX.89332158 | 4.79E+08 | 0.05 | -5.21  | 3.14 | 0.05 |
| E1 | GY   | 5B | AX.89403157 | 6.32E+08 | 0.27 | 2.74   | 3.46 | 0.06 |
| E1 | GY   | 5B | AX.89607377 | 6.35E+08 | 0.28 | 2.62   | 3.28 | 0.05 |
| E1 | GY   | 5B | AX.89594998 | 7.03E+08 | 0.28 | -2.64  | 3.30 | 0.06 |
| E1 | GY   | 5B | AX.89406483 | 1.96E+07 | 0.18 | -3.24  | 3.62 | 0.07 |
| E1 | GY   | 5B | AX.89440092 | 6.35E+08 | 0.28 | 2.62   | 3.28 | 0.05 |
| E1 | GY   | 5B | AX.89395633 | 5.86E+08 | 0.33 | 2.54   | 3.37 | 0.04 |
| E1 | GY   | 5B | AX.89322854 | 1.13E+07 | 0.17 | -3.31  | 3.62 | 0.05 |
| E1 | GY   | 5B | AX.89454130 | 6.38E+08 | 0.49 | -2.27  | 3.08 | 0.05 |
| E1 | GY   | 5B | AX.89439094 | 5.60E+08 | 0.25 | 2.66   | 3.15 | 0.05 |
| E1 | GY   | 5B | AX.89630809 | 4.80E+08 | 0.05 | -5.21  | 3.14 | 0.05 |
| E1 | GY   | 5B | AX.89529948 | 2.00E+07 | 0.29 | -2.53  | 3.15 | 0.05 |
| E1 | GY   | 5B | AX.89668374 | 3.15E+08 | 0.21 | -3.74  | 5.12 | 0.08 |
| E1 | GY   | 5B | AX.89376899 | 5.87E+08 | 0.27 | -2.66  | 3.31 | 0.06 |
| E1 | GY   | 5B | AX.89458043 | 5.38E+08 | 0.08 | 4.16   | 3.15 | 0.05 |
| E1 | GY   | 5B | AX.89357083 | 6.21E+08 | 0.24 | 2.99   | 3.74 | 0.07 |
| E1 | GY   | 5B | AX.89734081 | 7.13E+08 | 0.06 | -4.91  | 3.04 | 0.05 |
| E1 | GY   | 5B | AX.89392715 | 6.43E+08 | 0.11 | -3.67  | 3.08 | 0.05 |
| E1 | GY   | 5B | AX.89649925 | 4.79E+08 | 0.05 | -5.21  | 3.14 | 0.05 |



|    |      |    |             |          |      |        |      |      |
|----|------|----|-------------|----------|------|--------|------|------|
| E1 | GY   | 5B | AX.89548636 | 1.96E+07 | 0.14 | -3.52  | 3.56 | 0.05 |
| E1 | GY   | 5B | AX.89548636 | 1.96E+07 | 0.14 | -3.52  | 3.56 | 0.05 |
| E1 | SPM2 | 5B | AX.89430959 | 5.19E+08 | 0.11 | -29.48 | 3.71 | 0.06 |
| E1 | GY   | 5B | AX.86169102 | 5.42E+08 | 0.11 | 3.65   | 3.04 | 0.05 |
| E1 | GY   | 5B | AX.89354035 | 6.32E+08 | 0.27 | 2.74   | 3.46 | 0.06 |
| E1 | GY   | 5B | AX.89354035 | 6.32E+08 | 0.27 | 2.74   | 3.46 | 0.06 |
| E1 | GY   | 5B | AX.89327941 | 4.89E+08 | 0.06 | -4.93  | 3.06 | 0.05 |
| E1 | GY   | 5B | AX.89327941 | 4.89E+08 | 0.06 | -4.93  | 3.06 | 0.05 |
| E1 | GY   | 5B | AX.89538059 | 6.32E+08 | 0.27 | 2.74   | 3.46 | 0.06 |
| E1 | GY   | 5B | AX.89413887 | 1.97E+07 | 0.18 | -3.25  | 3.58 | 0.05 |
| E1 | GY   | 5B | AX.89576361 | 6.36E+08 | 0.29 | 2.51   | 3.11 | 0.04 |
| E1 | GY   | 5B | AX.89503604 | 4.89E+08 | 0.05 | -5.20  | 3.13 | 0.05 |
| E1 | GY   | 5B | AX.89542017 | 6.36E+08 | 0.31 | 2.87   | 4.05 | 0.06 |
| E1 | GY   | 5B | AX.89542017 | 6.36E+08 | 0.31 | 2.87   | 4.05 | 0.06 |
| E1 | GY   | 5B | AX.89350656 | 6.43E+08 | 0.10 | -3.93  | 3.34 | 0.05 |
| E1 | GY   | 5B | AX.89358593 | 6.35E+08 | 0.28 | 2.62   | 3.28 | 0.05 |
| E1 | GY   | 5B | AX.86164400 | 4.69E+08 | 0.25 | -2.61  | 3.06 | 0.05 |
| E1 | GY   | 5B | AX.89339124 | 5.86E+08 | 0.33 | 2.51   | 3.29 | 0.04 |
| E1 | GY   | 5B | AX.89594179 | 1.98E+07 | 0.18 | -3.25  | 3.58 | 0.05 |
| E1 | GY   | 5B | AX.89764509 | 6.43E+08 | 0.11 | -3.67  | 3.08 | 0.05 |
| E1 | GY   | 5B | AX.89682309 | 4.79E+08 | 0.05 | -5.21  | 3.14 | 0.05 |
| E1 | GY   | 5B | AX.89456566 | 4.89E+08 | 0.06 | -4.93  | 3.06 | 0.05 |
| E1 | GY   | 5B | AX.89367667 | 6.32E+08 | 0.24 | 2.80   | 3.33 | 0.06 |
| E1 | GY   | 5B | AX.89362470 | 4.79E+08 | 0.05 | -5.21  | 3.14 | 0.05 |
| E1 | GY   | 5B | AX.89364126 | 4.79E+08 | 0.05 | -5.21  | 3.14 | 0.05 |
| E1 | GY   | 5B | AX.89344695 | 6.35E+08 | 0.29 | 2.62   | 3.31 | 0.05 |
| E1 | GY   | 5B | AX.89309378 | 5.88E+08 | 0.27 | -2.66  | 3.31 | 0.06 |
| E1 | GY   | 5B | AX.89318852 | 1.13E+07 | 0.17 | -3.31  | 3.62 | 0.05 |
| E1 | GY   | 5B | AX.89387609 | 6.43E+08 | 0.11 | -3.67  | 3.08 | 0.05 |
| E1 | GY   | 5B | AX.89387609 | 6.43E+08 | 0.11 | -3.67  | 3.08 | 0.05 |
| E1 | GY   | 5B | AX.89364963 | 1.11E+07 | 0.17 | -3.31  | 3.62 | 0.05 |
| E1 | GY   | 5B | AX.89529948 | 2.00E+07 | 0.29 | -2.53  | 3.15 | 0.05 |
| E1 | GY   | 5B | AX.89530183 | 4.80E+08 | 0.05 | -5.21  | 3.14 | 0.05 |
| E1 | GY   | 5B | AX.89392715 | 6.43E+08 | 0.11 | -3.67  | 3.08 | 0.05 |
| E1 | GY   | 5B | AX.89544668 | 1.97E+07 | 0.18 | -3.24  | 3.62 | 0.05 |
| E1 | GY   | 5B | AX.86169104 | 5.42E+08 | 0.11 | 3.73   | 3.25 | 0.06 |
| E1 | GY   | 5B | AX.89389198 | 6.32E+08 | 0.23 | 2.82   | 3.31 | 0.06 |
| E1 | GY   | 5B | AX.89624258 | 6.43E+08 | 0.11 | -3.67  | 3.08 | 0.05 |
| E1 | GY   | 5B | AX.89342676 | 6.30E+08 | 0.23 | 2.90   | 3.51 | 0.06 |
| E1 | GY   | 5B | AX.89576361 | 6.36E+08 | 0.29 | 2.51   | 3.11 | 0.04 |
| E1 | GY   | 5B | AX.89662754 | 4.79E+08 | 0.05 | -5.21  | 3.14 | 0.05 |
| E1 | GY   | 5B | AX.89727351 | 5.86E+08 | 0.33 | 2.51   | 3.29 | 0.04 |
| E1 | GY   | 5B | AX.89624706 | 6.34E+08 | 0.28 | 2.62   | 3.28 | 0.05 |
| E1 | GY   | 5B | AX.89437644 | 4.89E+08 | 0.05 | -5.21  | 3.13 | 0.05 |
| E1 | GY   | 5B | AX.89406483 | 1.96E+07 | 0.18 | -3.24  | 3.62 | 0.07 |
| E1 | GY   | 5B | AX.89332158 | 4.79E+08 | 0.05 | -5.21  | 3.14 | 0.05 |
| E1 | GY   | 5B | AX.89531514 | 6.34E+08 | 0.28 | 2.62   | 3.28 | 0.05 |
| E1 | GY   | 5B | AX.89310027 | 4.79E+08 | 0.05 | -5.21  | 3.14 | 0.05 |
| E1 | GY   | 5B | AX.89310027 | 4.79E+08 | 0.05 | -5.21  | 3.14 | 0.05 |
| E1 | GY   | 5B | AX.89438140 | 4.79E+08 | 0.05 | -5.21  | 3.14 | 0.05 |

|    |      |    |             |          |      |        |      |      |
|----|------|----|-------------|----------|------|--------|------|------|
| E1 | GY   | 5B | AX.89340138 | 6.30E+08 | 0.23 | 2.90   | 3.51 | 0.06 |
| E1 | GY   | 5B | AX.89704033 | 5.62E+08 | 0.27 | 2.58   | 3.10 | 0.05 |
| E1 | GY   | 5B | AX.89322373 | 5.86E+08 | 0.34 | 2.54   | 3.40 | 0.04 |
| E1 | GY   | 5B | AX.89508897 | 6.43E+08 | 0.11 | -3.67  | 3.08 | 0.05 |
| E1 | GY   | 5B | AX.89426826 | 6.43E+08 | 0.11 | -3.67  | 3.08 | 0.05 |
| E1 | GY   | 5B | AX.89755864 | 6.35E+08 | 0.28 | 2.62   | 3.28 | 0.05 |
| E1 | GY   | 5B | AX.89386836 | 5.87E+08 | 0.34 | 2.54   | 3.40 | 0.04 |
| E1 | GY   | 5B | AX.89582272 | 6.37E+08 | 0.34 | 2.45   | 3.19 | 0.05 |
| E1 | GY   | 5B | AX.89769947 | 6.37E+08 | 0.30 | 2.94   | 4.14 | 0.06 |
| E1 | GY   | 5B | AX.89400480 | 1.98E+07 | 0.18 | -3.25  | 3.58 | 0.05 |
| E1 | GY   | 5B | AX.89704769 | 6.35E+08 | 0.28 | 2.62   | 3.28 | 0.05 |
| E1 | GY   | 5B | AX.89438995 | 2.00E+07 | 0.24 | -2.79  | 3.31 | 0.05 |
| E1 | GY   | 5B | AX.89438995 | 2.00E+07 | 0.24 | -2.79  | 3.31 | 0.05 |
| E1 | GY   | 5B | AX.89333600 | 6.36E+08 | 0.30 | 2.94   | 4.14 | 0.06 |
| E1 | GY   | 5B | AX.89428128 | 2.00E+07 | 0.19 | -3.24  | 3.69 | 0.06 |
| E1 | GY   | 5B | AX.89647576 | 4.79E+08 | 0.05 | -5.21  | 3.14 | 0.05 |
| E1 | GY   | 5B | AX.89652375 | 4.79E+08 | 0.05 | -5.21  | 3.14 | 0.05 |
| E1 | GY   | 5B | AX.89497888 | 4.89E+08 | 0.05 | -5.20  | 3.13 | 0.05 |
| E1 | GY   | 5B | AX.89369430 | 1.14E+07 | 0.17 | -3.31  | 3.62 | 0.05 |
| E1 | GY   | 5B | AX.89311810 | 6.32E+08 | 0.27 | 2.67   | 3.35 | 0.06 |
| E1 | GY   | 5B | AX.89600742 | 5.61E+08 | 0.25 | 2.66   | 3.15 | 0.05 |
| E1 | GY   | 5B | AX.89726529 | 4.79E+08 | 0.05 | -5.21  | 3.14 | 0.05 |
| E1 | GY   | 5B | AX.89440092 | 6.35E+08 | 0.28 | 2.62   | 3.28 | 0.05 |
| E1 | GY   | 5B | AX.89444392 | 6.37E+08 | 0.30 | 2.94   | 4.14 | 0.06 |
| E1 | GY   | 5B | AX.89673663 | 6.36E+08 | 0.34 | 2.45   | 3.19 | 0.05 |
| E1 | GY   | 5B | AX.89410418 | 4.79E+08 | 0.05 | -5.21  | 3.14 | 0.05 |
| E1 | GY   | 5B | AX.89541991 | 6.34E+08 | 0.28 | 2.62   | 3.28 | 0.05 |
| E1 | GY   | 5B | AX.89541991 | 6.34E+08 | 0.28 | 2.62   | 3.28 | 0.05 |
| E1 | GY   | 5B | AX.89370717 | 7.04E+08 | 0.28 | -2.76  | 3.61 | 0.06 |
| E1 | GY   | 5B | AX.89371209 | 6.37E+08 | 0.30 | 3.21   | 4.81 | 0.07 |
| E1 | GY   | 5B | AX.89394512 | 1.95E+07 | 0.19 | -3.17  | 3.60 | 0.07 |
| E1 | GY   | 5B | AX.89764509 | 6.43E+08 | 0.11 | -3.67  | 3.08 | 0.05 |
| E1 | GY   | 5B | AX.89654700 | 5.45E+08 | 0.13 | 3.37   | 3.07 | 0.05 |
| E1 | GY   | 5B | AX.89441811 | 1.98E+07 | 0.18 | -3.25  | 3.58 | 0.05 |
| E1 | GY   | 5B | AX.89476252 | 1.98E+07 | 0.23 | -2.70  | 3.09 | 0.06 |
| E1 | GY   | 5B | AX.89476252 | 1.98E+07 | 0.23 | -2.70  | 3.09 | 0.06 |
| E1 | GY   | 5B | AX.89438140 | 4.79E+08 | 0.05 | -5.21  | 3.14 | 0.05 |
| E1 | GY   | 5B | AX.89322373 | 5.86E+08 | 0.34 | 2.54   | 3.40 | 0.04 |
| E1 | GY   | 5B | AX.89563145 | 4.80E+08 | 0.05 | -5.21  | 3.14 | 0.05 |
| E1 | GY   | 5B | AX.89547058 | 5.83E+08 | 0.27 | 2.65   | 3.23 | 0.05 |
| E1 | GY   | 5B | AX.89318852 | 1.13E+07 | 0.17 | -3.31  | 3.62 | 0.05 |
| E1 | GY   | 5B | AX.89403758 | 6.31E+08 | 0.23 | 2.90   | 3.51 | 0.06 |
| E1 | GY   | 5B | AX.89380181 | 5.62E+08 | 0.32 | 2.61   | 3.45 | 0.05 |
| E1 | GY   | 5B | AX.89607893 | 3.73E+08 | 0.07 | -4.48  | 3.26 | 0.05 |
| E1 | GY   | 5B | AX.89607893 | 3.73E+08 | 0.07 | -4.48  | 3.26 | 0.05 |
| E1 | GY   | 5B | AX.89396386 | 1.14E+07 | 0.17 | -3.31  | 3.62 | 0.05 |
| E1 | GY   | 5B | AX.89439777 | 2.00E+07 | 0.18 | -3.25  | 3.58 | 0.05 |
| E1 | SPM2 | 5B | AX.89377670 | 1.32E+07 | 0.30 | -19.51 | 3.58 | 0.06 |
| E1 | GY   | 5B | AX.89357144 | 6.30E+08 | 0.23 | 2.90   | 3.51 | 0.06 |
| E1 | GY   | 5B | AX.89327601 | 6.31E+08 | 0.23 | 2.90   | 3.51 | 0.06 |

|    |      |    |             |          |      |        |      |      |
|----|------|----|-------------|----------|------|--------|------|------|
| E1 | GY   | 5B | AX.89428861 | 5.87E+08 | 0.33 | 2.51   | 3.29 | 0.04 |
| E1 | SPM2 | 5B | AX.89741388 | 1.32E+07 | 0.32 | -17.72 | 3.14 | 0.05 |
| E1 | GY   | 5B | AX.89338493 | 6.32E+08 | 0.27 | 2.81   | 3.65 | 0.07 |
| E1 | GY   | 5B | AX.89538059 | 6.32E+08 | 0.27 | 2.74   | 3.46 | 0.06 |
| E1 | GY   | 5B | AX.89385868 | 1.13E+07 | 0.17 | -3.31  | 3.62 | 0.05 |
| E1 | GY   | 5B | AX.89350656 | 6.43E+08 | 0.10 | -3.93  | 3.34 | 0.05 |
| E1 | GY   | 5B | AX.89371209 | 6.37E+08 | 0.30 | 3.21   | 4.81 | 0.07 |
| E1 | GY   | 5B | AX.89481691 | 4.79E+08 | 0.05 | -5.21  | 3.14 | 0.05 |
| E1 | GY   | 5B | AX.89351668 | 4.89E+08 | 0.05 | -5.20  | 3.13 | 0.05 |
| E1 | GY   | 5B | AX.89517273 | 6.43E+08 | 0.11 | -3.67  | 3.08 | 0.05 |
| E1 | GY   | 5B | AX.86164400 | 4.69E+08 | 0.25 | -2.61  | 3.06 | 0.05 |
| E1 | GY   | 5B | AX.89403758 | 6.31E+08 | 0.23 | 2.90   | 3.51 | 0.06 |
| E1 | GY   | 5B | AX.89536258 | 6.43E+08 | 0.11 | -3.67  | 3.08 | 0.05 |
| E1 | GY   | 5B | AX.89447137 | 6.34E+08 | 0.28 | 2.69   | 3.41 | 0.05 |
| E1 | GY   | 5B | AX.89369103 | 1.95E+07 | 0.18 | -3.25  | 3.58 | 0.05 |
| E1 | GY   | 5B | AX.89636730 | 6.26E+08 | 0.24 | 2.66   | 3.10 | 0.05 |
| E1 | GY   | 5B | AX.89701440 | 1.98E+07 | 0.18 | -3.25  | 3.58 | 0.05 |
| E1 | GY   | 5B | AX.89474397 | 5.86E+08 | 0.33 | 2.51   | 3.29 | 0.04 |
| E1 | GY   | 5B | AX.89588192 | 5.86E+08 | 0.35 | 2.61   | 3.62 | 0.05 |
| E1 | GY   | 5B | AX.89734020 | 5.81E+08 | 0.24 | 2.67   | 3.12 | 0.03 |
| E1 | GY   | 5B | AX.89444392 | 6.37E+08 | 0.30 | 2.94   | 4.14 | 0.06 |
| E1 | GY   | 5B | AX.89757467 | 5.86E+08 | 0.34 | 2.54   | 3.40 | 0.04 |
| E1 | GY   | 5B | AX.86169104 | 5.42E+08 | 0.11 | 3.73   | 3.25 | 0.06 |
| E1 | SPM2 | 5B | AX.89333065 | 4.60E+08 | 0.20 | -20.76 | 3.22 | 0.05 |
| E1 | GY   | 5B | AX.89685981 | 6.43E+08 | 0.11 | -3.67  | 3.08 | 0.05 |
| E1 | GY   | 5B | AX.89685981 | 6.43E+08 | 0.11 | -3.67  | 3.08 | 0.05 |
| E1 | GY   | 5B | AX.89649925 | 4.79E+08 | 0.05 | -5.21  | 3.14 | 0.05 |
| E1 | GY   | 5B | AX.89471949 | 1.95E+07 | 0.18 | -3.25  | 3.58 | 0.05 |
| E1 | GY   | 5B | AX.89367249 | 4.79E+08 | 0.05 | -5.21  | 3.14 | 0.05 |
| E1 | GY   | 5B | AX.89367299 | 5.86E+08 | 0.34 | 2.54   | 3.40 | 0.04 |
| E1 | GY   | 5B | AX.89367299 | 5.86E+08 | 0.34 | 2.54   | 3.40 | 0.04 |
| E1 | GY   | 5B | AX.89554341 | 4.79E+08 | 0.05 | -5.21  | 3.14 | 0.05 |
| E1 | GY   | 5B | AX.89554341 | 4.79E+08 | 0.05 | -5.21  | 3.14 | 0.05 |
| E1 | GY   | 5B | AX.89662754 | 4.79E+08 | 0.05 | -5.21  | 3.14 | 0.05 |
| E1 | GY   | 5B | AX.89355657 | 5.60E+08 | 0.25 | 2.66   | 3.15 | 0.05 |
| E1 | GY   | 5B | AX.89508910 | 6.32E+08 | 0.23 | 2.90   | 3.51 | 0.06 |
| E1 | GY   | 5B | AX.89379647 | 6.35E+08 | 0.28 | 2.62   | 3.28 | 0.05 |
| E1 | GY   | 5B | AX.89532223 | 6.32E+08 | 0.27 | 2.74   | 3.46 | 0.06 |
| E1 | GY   | 5B | AX.89415477 | 6.31E+08 | 0.23 | 2.90   | 3.51 | 0.06 |
| E1 | GY   | 5B | AX.89344695 | 6.35E+08 | 0.29 | 2.62   | 3.31 | 0.05 |
| E1 | GY   | 5B | AX.89400480 | 1.98E+07 | 0.18 | -3.25  | 3.58 | 0.05 |
| E1 | GY   | 5B | AX.89380181 | 5.62E+08 | 0.32 | 2.61   | 3.45 | 0.05 |
| E1 | GY   | 5B | AX.89749327 | 5.87E+08 | 0.33 | 2.43   | 3.09 | 0.04 |
| E1 | GY   | 5B | AX.89474397 | 5.86E+08 | 0.33 | 2.51   | 3.29 | 0.04 |
| E1 | GY   | 5B | AX.89615514 | 1.98E+07 | 0.18 | -3.25  | 3.58 | 0.05 |
| E1 | GY   | 5B | AX.89357028 | 2.00E+07 | 0.18 | -3.25  | 3.58 | 0.05 |
| E1 | GY   | 5B | AX.89734020 | 5.81E+08 | 0.24 | 2.67   | 3.12 | 0.03 |
| E1 | GY   | 5B | AX.89413298 | 6.30E+08 | 0.23 | 2.90   | 3.51 | 0.06 |
| E1 | GY   | 5B | AX.89544668 | 1.97E+07 | 0.18 | -3.24  | 3.62 | 0.05 |
| E1 | GY   | 5B | AX.89552577 | 4.79E+08 | 0.05 | -5.21  | 3.14 | 0.05 |

|    |      |    |             |          |      |        |      |      |
|----|------|----|-------------|----------|------|--------|------|------|
| E1 | GY   | 5B | AX.89653121 | 2.00E+07 | 0.19 | -3.33  | 3.92 | 0.06 |
| E1 | GY   | 5B | AX.89746558 | 4.79E+08 | 0.05 | -5.21  | 3.14 | 0.05 |
| E1 | GY   | 5B | AX.89381160 | 6.93E+08 | 0.06 | -4.93  | 3.26 | 0.07 |
| E1 | GY   | 5B | AX.86169102 | 5.42E+08 | 0.11 | 3.65   | 3.04 | 0.05 |
| E1 | GY   | 5B | AX.89405592 | 5.61E+08 | 0.25 | 2.66   | 3.15 | 0.05 |
| E1 | GY   | 5B | AX.89381592 | 4.80E+08 | 0.05 | -5.21  | 3.14 | 0.05 |
| E1 | GY   | 5B | AX.89381592 | 4.80E+08 | 0.05 | -5.21  | 3.14 | 0.05 |
| E1 | GY   | 5B | AX.89346742 | 6.31E+08 | 0.23 | 2.90   | 3.51 | 0.06 |
| E1 | GY   | 5B | AX.89546059 | 1.15E+07 | 0.18 | -3.14  | 3.38 | 0.05 |
| E1 | GY   | 5B | AX.89313525 | 6.32E+08 | 0.27 | 2.74   | 3.46 | 0.06 |
| E1 | GY   | 5B | AX.89485770 | 1.13E+07 | 0.17 | -3.31  | 3.62 | 0.05 |
| E1 | GY   | 5B | AX.89654700 | 5.45E+08 | 0.13 | 3.37   | 3.07 | 0.05 |
| E1 | GY   | 5B | AX.89641721 | 6.42E+08 | 0.11 | -3.67  | 3.08 | 0.05 |
| E1 | GY   | 5B | AX.89382361 | 7.13E+08 | 0.08 | -4.29  | 3.18 | 0.05 |
| E1 | GY   | 5B | AX.89382361 | 7.13E+08 | 0.08 | -4.29  | 3.18 | 0.05 |
| E1 | GY   | 5B | AX.89590734 | 5.61E+08 | 0.25 | 2.66   | 3.15 | 0.05 |
| E1 | GY   | 5B | AX.89667390 | 1.97E+07 | 0.18 | -3.25  | 3.58 | 0.05 |
| E1 | GY   | 5B | AX.89336425 | 6.29E+08 | 0.24 | 2.92   | 3.59 | 0.06 |
| E1 | GY   | 5B | AX.89594998 | 7.03E+08 | 0.28 | -2.64  | 3.30 | 0.06 |
| E1 | GY   | 5B | AX.89547058 | 5.83E+08 | 0.27 | 2.65   | 3.23 | 0.05 |
| E1 | GY   | 5B | AX.89591274 | 4.55E+08 | 0.23 | -2.80  | 3.26 | 0.06 |
| E1 | GY   | 5B | AX.89591274 | 4.55E+08 | 0.23 | -2.80  | 3.26 | 0.06 |
| E1 | GY   | 5B | AX.89603441 | 6.31E+08 | 0.23 | 2.90   | 3.51 | 0.06 |
| E1 | GY   | 5B | AX.89454130 | 6.38E+08 | 0.49 | -2.27  | 3.08 | 0.05 |
| E1 | GY   | 5B | AX.89617672 | 8.24E+06 | 0.13 | -3.37  | 3.08 | 0.05 |
| E1 | GY   | 5B | AX.89383487 | 6.43E+08 | 0.11 | -3.67  | 3.08 | 0.05 |
| E1 | GY   | 5B | AX.89766465 | 4.79E+08 | 0.05 | -5.21  | 3.14 | 0.05 |
| E1 | GY   | 5B | AX.89619699 | 6.32E+08 | 0.28 | 2.53   | 3.08 | 0.05 |
| E1 | GY   | 5B | AX.89619699 | 6.32E+08 | 0.28 | 2.53   | 3.08 | 0.05 |
| E1 | GY   | 5B | AX.89619706 | 5.62E+08 | 0.33 | 2.49   | 3.23 | 0.05 |
| E1 | GY   | 5B | AX.89439777 | 2.00E+07 | 0.18 | -3.25  | 3.58 | 0.05 |
| E1 | GY   | 5B | AX.89652622 | 7.04E+06 | 0.39 | 2.40   | 3.24 | 0.05 |
| E1 | SPM2 | 5B | AX.89423877 | 6.65E+06 | 0.20 | -20.73 | 3.16 | 0.05 |
| E1 | GY   | 5B | AX.89730035 | 5.42E+08 | 0.11 | 3.73   | 3.25 | 0.06 |
| E1 | GY   | 5B | AX.89542131 | 6.36E+08 | 0.27 | 2.99   | 4.06 | 0.06 |
| E1 | GY   | 5B | AX.89428861 | 5.87E+08 | 0.33 | 2.51   | 3.29 | 0.04 |
| E1 | GY   | 5B | AX.89393248 | 6.65E+06 | 0.40 | 2.30   | 3.05 | 0.04 |
| E1 | GY   | 5B | AX.89503604 | 4.89E+08 | 0.05 | -5.20  | 3.13 | 0.05 |
| E1 | GY   | 5B | AX.89456230 | 6.35E+08 | 0.29 | 2.57   | 3.21 | 0.05 |
| E1 | GY   | 5B | AX.89504076 | 7.03E+08 | 0.07 | -4.77  | 3.45 | 0.07 |
| E1 | GY   | 5B | AX.89621509 | 4.55E+08 | 0.23 | -2.80  | 3.26 | 0.06 |
| E1 | GY   | 5B | AX.89481691 | 4.79E+08 | 0.05 | -5.21  | 3.14 | 0.05 |
| E1 | GY   | 5B | AX.89351668 | 4.89E+08 | 0.05 | -5.20  | 3.13 | 0.05 |
| E1 | GY   | 5B | AX.89680483 | 4.80E+08 | 0.05 | -5.21  | 3.14 | 0.05 |
| E1 | GY   | 5B | AX.89622545 | 6.36E+08 | 0.34 | 2.45   | 3.19 | 0.05 |
| E1 | GY   | 5B | AX.89769947 | 6.37E+08 | 0.30 | 2.94   | 4.14 | 0.06 |
| E1 | GY   | 5B | AX.89679650 | 5.86E+08 | 0.33 | 2.51   | 3.29 | 0.04 |
| E1 | GY   | 5B | AX.89679650 | 5.86E+08 | 0.33 | 2.51   | 3.29 | 0.04 |
| E1 | GY   | 5B | AX.89672140 | 6.35E+08 | 0.28 | 2.62   | 3.28 | 0.05 |
| E1 | GY   | 5B | AX.89319162 | 6.36E+08 | 0.33 | 2.70   | 3.75 | 0.06 |

|    |    |    |             |          |      |       |      |      |
|----|----|----|-------------|----------|------|-------|------|------|
| E1 | GY | 5B | AX.89435584 | 4.79E+08 | 0.05 | -5.21 | 3.14 | 0.05 |
| E1 | GY | 5B | AX.89659582 | 6.34E+08 | 0.28 | 2.62  | 3.28 | 0.05 |
| E1 | GY | 5B | AX.89447137 | 6.34E+08 | 0.28 | 2.69  | 3.41 | 0.05 |
| E1 | GY | 5B | AX.89587535 | 6.36E+08 | 0.34 | 2.45  | 3.19 | 0.05 |
| E1 | GY | 5B | AX.89587535 | 6.36E+08 | 0.34 | 2.45  | 3.19 | 0.05 |
| E1 | GY | 5B | AX.89435827 | 6.34E+08 | 0.28 | 2.62  | 3.28 | 0.05 |
| E1 | GY | 5B | AX.89672663 | 6.36E+08 | 0.34 | 2.45  | 3.19 | 0.05 |
| E1 | GY | 5B | AX.89672663 | 6.36E+08 | 0.34 | 2.45  | 3.19 | 0.05 |
| E1 | GY | 5B | AX.89575415 | 6.93E+08 | 0.06 | -4.93 | 3.26 | 0.07 |
| E1 | GY | 5B | AX.89319628 | 2.00E+07 | 0.18 | -3.25 | 3.58 | 0.05 |
| E1 | GY | 5B | AX.89447653 | 6.32E+08 | 0.23 | 2.90  | 3.51 | 0.06 |
| E1 | GY | 5B | AX.89737044 | 1.13E+07 | 0.17 | -3.31 | 3.62 | 0.05 |
| E1 | GY | 5B | AX.89737044 | 1.13E+07 | 0.17 | -3.31 | 3.62 | 0.05 |
| E1 | GY | 5B | AX.89619826 | 4.79E+08 | 0.05 | -5.21 | 3.14 | 0.05 |
| E1 | GY | 5B | AX.89757467 | 5.86E+08 | 0.34 | 2.54  | 3.40 | 0.04 |
| E1 | GY | 5B | AX.89714869 | 4.79E+08 | 0.05 | -5.21 | 3.14 | 0.05 |
| E1 | GY | 5B | AX.89516752 | 1.97E+07 | 0.18 | -3.25 | 3.58 | 0.05 |
| E1 | GY | 5B | AX.89662514 | 4.79E+08 | 0.05 | -5.21 | 3.14 | 0.05 |
| E1 | GY | 5B | AX.89654057 | 4.80E+08 | 0.05 | -5.21 | 3.14 | 0.05 |
| E1 | GY | 5B | AX.89685979 | 6.32E+08 | 0.27 | 2.74  | 3.46 | 0.06 |
| E1 | GY | 5B | AX.89601860 | 7.03E+08 | 0.06 | -5.33 | 3.49 | 0.07 |
| E1 | GY | 5B | AX.89554094 | 5.87E+08 | 0.31 | 2.47  | 3.09 | 0.04 |
| E1 | GY | 5B | AX.89508897 | 6.43E+08 | 0.11 | -3.67 | 3.08 | 0.05 |
| E1 | GY | 5B | AX.89675642 | 4.80E+08 | 0.05 | -5.21 | 3.14 | 0.05 |
| E1 | GY | 5B | AX.89415477 | 6.31E+08 | 0.23 | 2.90  | 3.51 | 0.06 |
| E1 | GY | 5B | AX.89460759 | 4.79E+08 | 0.05 | -5.21 | 3.14 | 0.05 |
| E1 | GY | 5B | AX.89460759 | 4.79E+08 | 0.05 | -5.21 | 3.14 | 0.05 |
| E1 | GY | 5B | AX.89567072 | 1.14E+07 | 0.17 | -3.31 | 3.62 | 0.05 |
| E1 | GY | 5B | AX.89638418 | 4.79E+08 | 0.05 | -5.21 | 3.14 | 0.05 |
| E1 | GY | 5B | AX.89638729 | 1.15E+07 | 0.17 | -3.31 | 3.62 | 0.05 |
| E1 | GY | 5B | AX.89638729 | 1.15E+07 | 0.17 | -3.31 | 3.62 | 0.05 |
| E1 | GY | 5B | AX.89428128 | 2.00E+07 | 0.19 | -3.24 | 3.69 | 0.06 |
| E1 | GY | 5B | AX.89603853 | 6.32E+08 | 0.23 | 2.90  | 3.51 | 0.06 |
| E1 | GY | 5B | AX.89603853 | 6.32E+08 | 0.23 | 2.90  | 3.51 | 0.06 |
| E1 | GY | 5B | AX.89664468 | 4.79E+08 | 0.05 | -5.21 | 3.14 | 0.05 |
| E1 | GY | 5B | AX.89664468 | 4.79E+08 | 0.05 | -5.21 | 3.14 | 0.05 |
| E1 | GY | 5B | AX.89652375 | 4.79E+08 | 0.05 | -5.21 | 3.14 | 0.05 |
| E1 | GY | 5B | AX.89615514 | 1.98E+07 | 0.18 | -3.25 | 3.58 | 0.05 |
| E1 | GY | 5B | AX.89497888 | 4.89E+08 | 0.05 | -5.20 | 3.13 | 0.05 |
| E1 | GY | 5B | AX.89533286 | 5.87E+08 | 0.13 | -3.67 | 3.65 | 0.07 |
| E1 | GY | 5B | AX.89311810 | 6.32E+08 | 0.27 | 2.67  | 3.35 | 0.06 |
| E1 | GY | 5B | AX.89702097 | 6.35E+08 | 0.28 | 2.62  | 3.28 | 0.05 |
| E1 | GY | 5B | AX.89738550 | 6.37E+08 | 0.34 | 2.45  | 3.19 | 0.05 |
| E1 | GY | 5B | AX.89494884 | 5.60E+08 | 0.25 | 2.66  | 3.15 | 0.05 |
| E1 | GY | 5B | AX.89628012 | 4.79E+08 | 0.05 | -5.21 | 3.14 | 0.05 |
| E1 | GY | 5B | AX.89443122 | 5.87E+08 | 0.33 | 2.51  | 3.29 | 0.04 |
| E1 | GY | 5B | AX.89462733 | 1.95E+07 | 0.19 | -3.21 | 3.68 | 0.06 |
| E1 | GY | 5B | AX.89429757 | 5.05E+07 | 0.47 | -2.26 | 3.04 | 0.06 |
| E1 | GY | 5B | AX.89429757 | 5.05E+07 | 0.47 | -2.26 | 3.04 | 0.06 |
| E1 | GY | 5B | AX.89605744 | 6.36E+08 | 0.30 | 2.94  | 4.14 | 0.06 |

|    |    |    |             |          |      |       |      |      |
|----|----|----|-------------|----------|------|-------|------|------|
| E1 | GY | 5B | AX.89358593 | 6.35E+08 | 0.28 | 2.62  | 3.28 | 0.05 |
| E1 | GY | 5B | AX.89617380 | 5.87E+08 | 0.33 | 2.45  | 3.15 | 0.04 |
| E1 | GY | 5B | AX.89617380 | 5.87E+08 | 0.33 | 2.45  | 3.15 | 0.04 |
| E1 | GY | 5B | AX.89546059 | 1.15E+07 | 0.18 | -3.14 | 3.38 | 0.05 |
| E1 | GY | 5B | AX.89371307 | 5.86E+08 | 0.33 | 2.52  | 3.31 | 0.04 |
| E1 | GY | 5B | AX.89678376 | 2.00E+07 | 0.18 | -3.14 | 3.43 | 0.05 |
| E1 | GY | 5B | AX.89325602 | 6.93E+08 | 0.25 | -2.85 | 3.51 | 0.06 |
| E1 | GY | 5B | AX.89675139 | 6.32E+08 | 0.27 | 2.74  | 3.46 | 0.06 |
| E1 | GY | 5B | AX.89359864 | 5.61E+08 | 0.25 | 2.66  | 3.15 | 0.05 |
| E1 | GY | 5B | AX.89359864 | 5.61E+08 | 0.25 | 2.66  | 3.15 | 0.05 |
| E1 | GY | 5B | AX.89336425 | 6.29E+08 | 0.24 | 2.92  | 3.59 | 0.06 |
| E1 | GY | 5B | AX.89419340 | 6.43E+08 | 0.11 | -3.72 | 3.15 | 0.05 |
| E1 | GY | 5B | AX.89630366 | 7.04E+08 | 0.07 | -4.78 | 3.46 | 0.07 |
| E1 | GY | 5B | AX.89547536 | 4.79E+08 | 0.05 | -5.21 | 3.14 | 0.05 |
| E1 | GY | 5B | AX.89501084 | 1.97E+07 | 0.18 | -3.25 | 3.58 | 0.05 |
| E1 | GY | 5B | AX.89676214 | 6.37E+08 | 0.30 | 2.94  | 4.14 | 0.06 |
| E1 | GY | 5B | AX.89630809 | 4.80E+08 | 0.05 | -5.21 | 3.14 | 0.05 |
| E1 | GY | 5B | AX.89396229 | 6.32E+08 | 0.27 | 2.67  | 3.35 | 0.06 |
| E1 | GY | 5B | AX.89396386 | 1.14E+07 | 0.17 | -3.31 | 3.62 | 0.05 |
| E1 | GY | 5B | AX.89771453 | 4.79E+08 | 0.05 | -5.21 | 3.14 | 0.05 |
| E1 | GY | 5B | AX.89466410 | 6.43E+08 | 0.11 | -3.67 | 3.08 | 0.05 |
| E1 | GY | 5B | AX.89705205 | 5.83E+08 | 0.40 | 2.54  | 3.58 | 0.06 |
| E1 | GY | 5B | AX.89537992 | 1.95E+07 | 0.17 | -3.24 | 3.49 | 0.05 |
| E1 | GY | 5B | AX.89463041 | 4.66E+08 | 0.06 | -4.72 | 3.02 | 0.05 |
| E1 | GY | 5B | AX.89328144 | 4.79E+08 | 0.05 | -5.21 | 3.14 | 0.05 |
| E1 | GY | 5B | AX.89524656 | 6.43E+08 | 0.11 | -3.67 | 3.08 | 0.05 |
| E1 | GY | 5B | AX.89768576 | 4.79E+08 | 0.05 | -5.21 | 3.14 | 0.05 |
| E1 | GY | 5B | AX.89682309 | 4.79E+08 | 0.05 | -5.21 | 3.14 | 0.05 |
| E1 | GY | 5B | AX.89573412 | 6.36E+08 | 0.34 | 2.45  | 3.19 | 0.05 |
| E1 | GY | 5B | AX.89516768 | 4.79E+08 | 0.05 | -5.21 | 3.14 | 0.05 |
| E1 | GY | 5B | AX.89744337 | 6.37E+08 | 0.30 | 2.94  | 4.14 | 0.06 |
| E1 | GY | 5B | AX.89744337 | 6.37E+08 | 0.30 | 2.94  | 4.14 | 0.06 |
| E1 | GY | 5B | AX.89563145 | 4.80E+08 | 0.05 | -5.21 | 3.14 | 0.05 |
| E1 | GY | 5B | AX.89574029 | 5.86E+08 | 0.33 | 2.42  | 3.07 | 0.04 |
| E1 | GY | 5B | AX.89574029 | 5.86E+08 | 0.33 | 2.42  | 3.07 | 0.04 |
| E1 | GY | 5B | AX.89505018 | 4.79E+08 | 0.05 | -5.21 | 3.14 | 0.05 |
| E1 | GY | 5B | AX.89329613 | 1.97E+07 | 0.18 | -3.25 | 3.58 | 0.05 |
| E1 | GY | 5B | AX.89672140 | 6.35E+08 | 0.28 | 2.62  | 3.28 | 0.05 |
| E1 | GY | 5B | AX.89319162 | 6.36E+08 | 0.33 | 2.70  | 3.75 | 0.06 |
| E1 | GY | 5B | AX.89630915 | 5.62E+08 | 0.33 | 2.49  | 3.23 | 0.05 |
| E1 | GY | 5B | AX.89364963 | 1.11E+07 | 0.17 | -3.31 | 3.62 | 0.05 |
| E1 | GY | 5B | AX.89388133 | 6.32E+08 | 0.27 | 2.74  | 3.46 | 0.06 |
| E1 | GY | 5B | AX.89600633 | 1.15E+07 | 0.18 | -3.14 | 3.38 | 0.05 |
| E1 | GY | 5B | AX.89714869 | 4.79E+08 | 0.05 | -5.21 | 3.14 | 0.05 |
| E1 | GY | 5B | AX.89636584 | 6.31E+08 | 0.23 | 2.90  | 3.51 | 0.06 |
| E1 | GY | 5B | AX.89437256 | 6.32E+08 | 0.23 | 2.90  | 3.51 | 0.06 |
| E1 | GY | 5B | AX.89331656 | 6.32E+08 | 0.27 | 2.74  | 3.46 | 0.06 |
| E1 | GY | 5B | AX.89623198 | 4.89E+08 | 0.05 | -5.20 | 3.13 | 0.05 |
| E1 | GY | 5B | AX.89437564 | 6.43E+08 | 0.11 | -3.67 | 3.08 | 0.05 |
| E1 | GY | 5B | AX.89437564 | 6.43E+08 | 0.11 | -3.67 | 3.08 | 0.05 |

|    |      |    |             |          |      |        |      |      |
|----|------|----|-------------|----------|------|--------|------|------|
| E1 | GY   | 5B | AX.89354499 | 1.98E+07 | 0.18 | -3.25  | 3.58 | 0.05 |
| E1 | GY   | 5B | AX.89354499 | 1.98E+07 | 0.18 | -3.25  | 3.58 | 0.05 |
| E1 | SPM2 | 5B | AX.89439896 | 1.32E+07 | 0.29 | -19.09 | 3.38 | 0.06 |
| E1 | GY   | 5B | AX.89711876 | 1.95E+07 | 0.18 | -3.25  | 3.58 | 0.05 |
| E1 | GY   | 5B | AX.89542641 | 4.79E+08 | 0.05 | -5.21  | 3.14 | 0.05 |
| E1 | GY   | 5B | AX.89542641 | 4.79E+08 | 0.05 | -5.21  | 3.14 | 0.05 |
| E1 | GY   | 5B | AX.89496756 | 6.36E+08 | 0.34 | 2.45   | 3.19 | 0.05 |
| E1 | GY   | 5B | AX.89446263 | 6.37E+08 | 0.25 | 2.89   | 3.65 | 0.05 |
| E1 | GY   | 5B | AX.89614292 | 4.71E+08 | 0.28 | -2.72  | 3.48 | 0.06 |
| E1 | GY   | 5B | AX.89614292 | 4.71E+08 | 0.28 | -2.72  | 3.48 | 0.06 |
| E1 | GY   | 5B | AX.89461025 | 6.30E+08 | 0.23 | 2.90   | 3.51 | 0.06 |
| E1 | GY   | 5B | AX.89603441 | 6.31E+08 | 0.23 | 2.90   | 3.51 | 0.06 |
| E1 | GY   | 5B | AX.89543790 | 6.99E+06 | 0.44 | 2.27   | 3.03 | 0.05 |
| E1 | GY   | 5B | AX.89439094 | 5.60E+08 | 0.25 | 2.66   | 3.15 | 0.05 |
| E1 | GY   | 5B | AX.89333600 | 6.36E+08 | 0.30 | 2.94   | 4.14 | 0.06 |
| E1 | GY   | 5B | AX.89647576 | 4.79E+08 | 0.05 | -5.21  | 3.14 | 0.05 |
| E1 | GY   | 5B | AX.89724585 | 2.16E+07 | 0.11 | -3.74  | 3.27 | 0.05 |
| E1 | GY   | 5B | AX.89724585 | 2.16E+07 | 0.11 | -3.74  | 3.27 | 0.05 |
| E1 | GY   | 5B | AX.89725988 | 1.98E+07 | 0.18 | -3.25  | 3.58 | 0.05 |
| E1 | GY   | 5B | AX.89369430 | 1.14E+07 | 0.17 | -3.31  | 3.62 | 0.05 |
| E1 | GY   | 5B | AX.89357144 | 6.30E+08 | 0.23 | 2.90   | 3.51 | 0.06 |
| E1 | GY   | 5B | AX.89702226 | 6.37E+08 | 0.34 | 2.65   | 3.65 | 0.05 |
| E1 | GY   | 5B | AX.89714399 | 1.15E+07 | 0.18 | -3.14  | 3.38 | 0.05 |
| E1 | GY   | 5B | AX.89474866 | 4.79E+08 | 0.05 | -5.21  | 3.14 | 0.05 |
| E1 | GY   | 5B | AX.89474866 | 4.79E+08 | 0.05 | -5.21  | 3.14 | 0.05 |
| E1 | GY   | 5B | AX.89447968 | 4.79E+08 | 0.05 | -5.21  | 3.14 | 0.05 |
| E1 | GY   | 5B | AX.89544766 | 5.60E+08 | 0.25 | 2.66   | 3.15 | 0.05 |
| E1 | GY   | 5B | AX.89498476 | 6.36E+08 | 0.30 | 2.94   | 4.14 | 0.06 |
| E1 | GY   | 5B | AX.89628012 | 4.79E+08 | 0.05 | -5.21  | 3.14 | 0.05 |
| E1 | GY   | 5B | AX.89631907 | 6.36E+08 | 0.33 | 2.70   | 3.71 | 0.06 |
| E1 | GY   | 5B | AX.89405592 | 5.61E+08 | 0.25 | 2.66   | 3.15 | 0.05 |
| E1 | GY   | 5B | AX.89605744 | 6.36E+08 | 0.30 | 2.94   | 4.14 | 0.06 |
| E1 | GY   | 5B | AX.89727351 | 5.86E+08 | 0.33 | 2.51   | 3.29 | 0.04 |
| E1 | GY   | 5B | AX.89606400 | 6.31E+08 | 0.23 | 2.90   | 3.51 | 0.06 |
| E1 | GY   | 5B | AX.89608793 | 6.43E+08 | 0.11 | -3.67  | 3.08 | 0.05 |
| E1 | GY   | 5B | AX.89678376 | 2.00E+07 | 0.18 | -3.14  | 3.43 | 0.05 |
| E1 | GY   | 5B | AX.89394512 | 1.95E+07 | 0.19 | -3.17  | 3.60 | 0.07 |
| E1 | GY   | 5B | AX.89325602 | 6.93E+08 | 0.25 | -2.85  | 3.51 | 0.06 |
| E1 | GY   | 5B | AX.89641721 | 6.42E+08 | 0.11 | -3.67  | 3.08 | 0.05 |
| E1 | GY   | 5B | AX.89675252 | 5.61E+08 | 0.25 | 2.66   | 3.15 | 0.05 |
| E1 | GY   | 5B | AX.89675252 | 5.61E+08 | 0.25 | 2.66   | 3.15 | 0.05 |
| E1 | GY   | 5B | AX.89476578 | 5.60E+08 | 0.25 | 2.66   | 3.15 | 0.05 |
| E1 | GY   | 5B | AX.89476578 | 5.60E+08 | 0.25 | 2.66   | 3.15 | 0.05 |
| E1 | GY   | 5B | AX.89371830 | 6.32E+08 | 0.27 | 2.74   | 3.46 | 0.06 |
| E1 | GY   | 5B | AX.89464183 | 6.36E+08 | 0.34 | 2.45   | 3.19 | 0.05 |
| E1 | GY   | 5B | AX.89476724 | 5.86E+08 | 0.33 | 2.45   | 3.15 | 0.04 |
| E1 | GY   | 5B | AX.89476724 | 5.86E+08 | 0.33 | 2.45   | 3.15 | 0.04 |
| E1 | GY   | 5B | AX.89655262 | 7.03E+08 | 0.29 | -2.58  | 3.26 | 0.06 |
| E1 | GY   | 5B | AX.89594849 | 6.34E+08 | 0.28 | 2.62   | 3.28 | 0.05 |
| E1 | GY   | 5B | AX.89536172 | 1.98E+07 | 0.18 | -3.14  | 3.43 | 0.05 |

|    |      |    |             |          |      |        |      |      |
|----|------|----|-------------|----------|------|--------|------|------|
| E1 | SPM2 | 5B | AX.89489374 | 1.32E+07 | 0.29 | -19.88 | 3.63 | 0.06 |
| E1 | GY   | 5B | AX.89582777 | 4.79E+08 | 0.05 | -5.21  | 3.14 | 0.05 |
| E1 | SPM2 | 5B | AX.89311748 | 1.33E+07 | 0.33 | -18.37 | 3.36 | 0.06 |
| E1 | GY   | 5B | AX.89372325 | 6.34E+08 | 0.28 | 2.62   | 3.28 | 0.05 |
| E1 | GY   | 5B | AX.89501286 | 7.43E+07 | 0.47 | 2.31   | 3.16 | 0.06 |
| E1 | GY   | 5B | AX.89571058 | 1.95E+07 | 0.17 | -3.18  | 3.39 | 0.05 |
| E1 | GPS  | 5B | AX.89377670 | 1.32E+07 | 0.30 | 1.57   | 4.74 | 0.09 |
| E1 | GY   | 5B | AX.89396229 | 6.32E+08 | 0.27 | 2.67   | 3.35 | 0.06 |
| E1 | GY   | 5B | AX.89337552 | 5.87E+08 | 0.27 | -2.62  | 3.20 | 0.06 |
| E1 | GY   | 5B | AX.89619706 | 5.62E+08 | 0.33 | 2.49   | 3.23 | 0.05 |
| E1 | GY   | 5B | AX.89718577 | 5.86E+08 | 0.34 | 2.54   | 3.40 | 0.04 |
| E1 | GPS  | 5B | AX.89503604 | 4.89E+08 | 0.05 | -2.55  | 3.09 | 0.05 |
| E1 | GY   | 5B | AX.89421217 | 1.13E+07 | 0.17 | -3.31  | 3.62 | 0.05 |
| E1 | GY   | 5B | AX.89644485 | 1.98E+07 | 0.18 | -3.25  | 3.58 | 0.05 |
| E1 | GY   | 5B | AX.89669309 | 4.79E+08 | 0.05 | -5.21  | 3.14 | 0.05 |
| E1 | GY   | 5B | AX.89338493 | 6.32E+08 | 0.27 | 2.81   | 3.65 | 0.07 |
| E1 | GY   | 5B | AX.89731133 | 6.35E+08 | 0.28 | 2.62   | 3.28 | 0.05 |
| E1 | GY   | 5B | AX.89632393 | 5.86E+08 | 0.34 | 2.54   | 3.40 | 0.04 |
| E1 | GY   | 5B | AX.89338561 | 4.43E+08 | 0.44 | 2.64   | 3.95 | 0.07 |
| E1 | GY   | 5B | AX.89759768 | 5.62E+08 | 0.33 | 2.45   | 3.14 | 0.05 |
| E1 | GY   | 5B | AX.89609532 | 4.79E+08 | 0.05 | -5.21  | 3.14 | 0.05 |
| E1 | GY   | 5B | AX.89609532 | 4.79E+08 | 0.05 | -5.21  | 3.14 | 0.05 |
| E1 | GY   | 5B | AX.89703320 | 5.86E+08 | 0.33 | 2.51   | 3.29 | 0.04 |
| E1 | GY   | 5B | AX.89703320 | 5.86E+08 | 0.33 | 2.51   | 3.29 | 0.04 |
| E1 | GY   | 5B | AX.89535300 | 5.86E+08 | 0.34 | 2.54   | 3.40 | 0.04 |
| E1 | GY   | 5B | AX.89535300 | 5.86E+08 | 0.34 | 2.54   | 3.40 | 0.04 |
| E1 | GY   | 5B | AX.89364126 | 4.79E+08 | 0.05 | -5.21  | 3.14 | 0.05 |
| E1 | GY   | 5B | AX.89422733 | 6.35E+08 | 0.28 | 2.62   | 3.28 | 0.05 |
| E1 | GY   | 5B | AX.89577810 | 5.81E+08 | 0.24 | 2.67   | 3.12 | 0.03 |
| E1 | GY   | 5B | AX.89586465 | 6.34E+08 | 0.28 | 2.62   | 3.28 | 0.05 |
| E1 | GY   | 5B | AX.89586465 | 6.34E+08 | 0.28 | 2.62   | 3.28 | 0.05 |
| E1 | GPS  | 5B | AX.89454031 | 1.32E+07 | 0.30 | 1.57   | 4.74 | 0.09 |
| E1 | GY   | 5B | AX.89505018 | 4.79E+08 | 0.05 | -5.21  | 3.14 | 0.05 |
| E1 | GY   | 5B | AX.89708766 | 4.79E+08 | 0.05 | -5.21  | 3.14 | 0.05 |
| E1 | GY   | 5B | AX.89704982 | 4.80E+08 | 0.05 | -5.21  | 3.14 | 0.05 |
| E1 | GY   | 5B | AX.89704982 | 4.80E+08 | 0.05 | -5.21  | 3.14 | 0.05 |
| E1 | GY   | 5B | AX.89659582 | 6.34E+08 | 0.28 | 2.62   | 3.28 | 0.05 |
| E1 | GY   | 5B | AX.89650284 | 6.34E+08 | 0.28 | 2.62   | 3.28 | 0.05 |
| E1 | GY   | 5B | AX.89692990 | 6.43E+08 | 0.11 | -3.67  | 3.08 | 0.05 |
| E1 | GY   | 5B | AX.89692990 | 6.43E+08 | 0.11 | -3.67  | 3.08 | 0.05 |
| E1 | GY   | 5B | AX.89435827 | 6.34E+08 | 0.28 | 2.62   | 3.28 | 0.05 |
| E1 | GY   | 5B | AX.89447298 | 2.00E+07 | 0.18 | -3.25  | 3.58 | 0.05 |
| E1 | GY   | 5B | AX.89636730 | 6.26E+08 | 0.24 | 2.66   | 3.10 | 0.05 |
| E1 | GY   | 5B | AX.89575415 | 6.93E+08 | 0.06 | -4.93  | 3.26 | 0.07 |
| E1 | GY   | 5B | AX.89447653 | 6.32E+08 | 0.23 | 2.90   | 3.51 | 0.06 |
| E1 | GY   | 5B | AX.89564342 | 1.96E+07 | 0.18 | -3.25  | 3.58 | 0.05 |
| E1 | GY   | 5B | AX.89564342 | 1.96E+07 | 0.18 | -3.25  | 3.58 | 0.05 |
| E1 | GY   | 5B | AX.89448319 | 6.37E+08 | 0.30 | 2.94   | 4.14 | 0.06 |
| E1 | GPS  | 5B | AX.89543476 | 6.85E+08 | 0.07 | -2.37  | 3.32 | 0.06 |
| E1 | GY   | 5B | AX.89636584 | 6.31E+08 | 0.23 | 2.90   | 3.51 | 0.06 |



|    |     |    |             |          |      |       |      |      |
|----|-----|----|-------------|----------|------|-------|------|------|
| E1 | GPS | 5B | AX.89392333 | 6.85E+08 | 0.06 | -2.37 | 3.12 | 0.05 |
| E1 | GY  | 5B | AX.89636160 | 4.89E+08 | 0.05 | -5.20 | 3.13 | 0.05 |
| E1 | GY  | 5B | AX.89636160 | 4.89E+08 | 0.05 | -5.20 | 3.13 | 0.05 |
| E1 | GY  | 5B | AX.89367249 | 4.79E+08 | 0.05 | -5.21 | 3.14 | 0.05 |
| E1 | GY  | 5B | AX.89650371 | 4.79E+08 | 0.05 | -5.21 | 3.14 | 0.05 |
| E1 | GY  | 5B | AX.89650371 | 4.79E+08 | 0.05 | -5.21 | 3.14 | 0.05 |
| E1 | GY  | 5B | AX.89367667 | 6.32E+08 | 0.24 | 2.80  | 3.33 | 0.06 |
| E1 | GY  | 5B | AX.89598921 | 6.32E+08 | 0.26 | 2.75  | 3.42 | 0.06 |
| E1 | GY  | 5B | AX.89598921 | 6.32E+08 | 0.26 | 2.75  | 3.42 | 0.06 |
| E1 | GY  | 5B | AX.89426826 | 6.43E+08 | 0.11 | -3.67 | 3.08 | 0.05 |
| E1 | GY  | 5B | AX.89653910 | 5.81E+08 | 0.24 | 2.67  | 3.12 | 0.03 |
| E1 | GY  | 5B | AX.89379647 | 6.35E+08 | 0.28 | 2.62  | 3.28 | 0.05 |
| E1 | GPS | 5B | AX.89510887 | 1.32E+07 | 0.29 | 1.48  | 4.18 | 0.07 |
| E1 | GY  | 5B | AX.89500758 | 4.79E+08 | 0.05 | -5.21 | 3.14 | 0.05 |
| E1 | GY  | 5B | AX.89500758 | 4.79E+08 | 0.05 | -5.21 | 3.14 | 0.05 |
| E1 | GY  | 5B | AX.89582272 | 6.37E+08 | 0.34 | 2.45  | 3.19 | 0.05 |
| E1 | GY  | 5B | AX.89774767 | 6.37E+08 | 0.34 | 2.45  | 3.19 | 0.05 |
| E1 | GY  | 5B | AX.89510136 | 6.32E+08 | 0.27 | 2.59  | 3.15 | 0.06 |
| E1 | GY  | 5B | AX.89641096 | 4.79E+08 | 0.05 | -5.21 | 3.14 | 0.05 |
| E1 | GY  | 5B | AX.89587402 | 6.43E+08 | 0.11 | -3.67 | 3.08 | 0.05 |
| E1 | GY  | 5B | AX.89369103 | 1.95E+07 | 0.18 | -3.25 | 3.58 | 0.05 |
| E1 | GY  | 5B | AX.89749327 | 5.87E+08 | 0.33 | 2.43  | 3.09 | 0.04 |
| E1 | GY  | 5B | AX.89649133 | 4.80E+08 | 0.05 | -5.21 | 3.14 | 0.05 |
| E1 | GY  | 5B | AX.89639321 | 6.35E+08 | 0.28 | 2.62  | 3.28 | 0.05 |
| E1 | GY  | 5B | AX.89474842 | 4.79E+08 | 0.05 | -5.21 | 3.14 | 0.05 |
| E1 | GY  | 5B | AX.89474842 | 4.79E+08 | 0.05 | -5.21 | 3.14 | 0.05 |
| E1 | GY  | 5B | AX.89702287 | 6.20E+08 | 0.24 | 3.04  | 3.89 | 0.07 |
| E1 | GY  | 5B | AX.89447968 | 4.79E+08 | 0.05 | -5.21 | 3.14 | 0.05 |
| E1 | GY  | 5B | AX.89648556 | 6.32E+08 | 0.27 | 2.74  | 3.46 | 0.06 |
| E1 | GY  | 5B | AX.89475197 | 5.81E+08 | 0.24 | 2.67  | 3.12 | 0.03 |
| E1 | GY  | 5B | AX.89653121 | 2.00E+07 | 0.19 | -3.33 | 3.92 | 0.06 |
| E1 | GPS | 5B | AX.89734563 | 6.85E+08 | 0.06 | -2.37 | 3.12 | 0.05 |
| E1 | GPS | 5B | AX.89600504 | 6.86E+08 | 0.06 | -2.59 | 3.40 | 0.06 |
| E1 | GY  | 5B | AX.89655934 | 6.36E+08 | 0.34 | 2.45  | 3.19 | 0.05 |
| E1 | GPS | 5B | AX.89479246 | 6.86E+08 | 0.06 | -2.59 | 3.40 | 0.06 |
| E1 | GY  | 5B | AX.89346742 | 6.31E+08 | 0.23 | 2.90  | 3.51 | 0.06 |
| E1 | GY  | 5B | AX.89606400 | 6.31E+08 | 0.23 | 2.90  | 3.51 | 0.06 |
| E1 | GY  | 5B | AX.89371307 | 5.86E+08 | 0.33 | 2.52  | 3.31 | 0.04 |
| E1 | GY  | 5B | AX.89313525 | 6.32E+08 | 0.27 | 2.74  | 3.46 | 0.06 |
| E1 | GY  | 5B | AX.89594179 | 1.98E+07 | 0.18 | -3.25 | 3.58 | 0.05 |
| E1 | GY  | 5B | AX.89716468 | 6.43E+08 | 0.11 | -3.67 | 3.08 | 0.05 |
| E1 | GY  | 5B | AX.89755864 | 6.35E+08 | 0.28 | 2.62  | 3.28 | 0.05 |
| E1 | GY  | 5B | AX.89594849 | 6.34E+08 | 0.28 | 2.62  | 3.28 | 0.05 |
| E1 | GY  | 5B | AX.89679245 | 4.80E+08 | 0.05 | -5.21 | 3.14 | 0.05 |
| E1 | GY  | 5B | AX.89547536 | 4.79E+08 | 0.05 | -5.21 | 3.14 | 0.05 |
| E1 | GY  | 5B | AX.89617672 | 8.24E+06 | 0.13 | -3.37 | 3.08 | 0.05 |
| E1 | GY  | 5B | AX.89676214 | 6.37E+08 | 0.30 | 2.94  | 4.14 | 0.06 |
| E1 | GY  | 5B | AX.89638955 | 7.03E+08 | 0.28 | -3.27 | 4.80 | 0.09 |
| E1 | GY  | 5B | AX.89515226 | 6.35E+08 | 0.28 | 2.62  | 3.28 | 0.05 |
| E1 | GY  | 5B | AX.89532955 | 1.97E+07 | 0.18 | -3.25 | 3.58 | 0.05 |

|    |      |    |             |          |      |        |      |      |
|----|------|----|-------------|----------|------|--------|------|------|
| E1 | GY   | 5B | AX.89766465 | 4.79E+08 | 0.05 | -5.21  | 3.14 | 0.05 |
| E1 | SPM2 | 5B | AX.89772432 | 1.32E+07 | 0.30 | -19.51 | 3.58 | 0.06 |
| E1 | GY   | 5B | AX.89599482 | 6.35E+08 | 0.28 | 2.62   | 3.28 | 0.05 |
| E1 | GY   | 5B | AX.89599482 | 6.35E+08 | 0.28 | 2.62   | 3.28 | 0.05 |
| E1 | GY   | 5B | AX.89652622 | 7.04E+06 | 0.39 | 2.40   | 3.24 | 0.05 |
| E1 | GY   | 5B | AX.89514611 | 6.37E+08 | 0.34 | 2.45   | 3.19 | 0.05 |
| E1 | GY   | 5B | AX.89774719 | 6.35E+08 | 0.29 | 2.57   | 3.21 | 0.05 |
| E1 | GY   | 5B | AX.89421217 | 1.13E+07 | 0.17 | -3.31  | 3.62 | 0.05 |
| E1 | GY   | 5B | AX.89350220 | 4.89E+08 | 0.05 | -5.20  | 3.13 | 0.05 |
| E1 | GY   | 5B | AX.89350220 | 4.89E+08 | 0.05 | -5.20  | 3.13 | 0.05 |
| E1 | GY   | 5B | AX.89338561 | 4.43E+08 | 0.44 | 2.64   | 3.95 | 0.07 |
| E1 | GY   | 5B | AX.89561097 | 5.62E+08 | 0.27 | 2.62   | 3.21 | 0.05 |
| E1 | GY   | 5B | AX.89671443 | 4.80E+08 | 0.05 | -5.21  | 3.14 | 0.05 |
| E1 | GY   | 5B | AX.89671443 | 4.80E+08 | 0.05 | -5.21  | 3.14 | 0.05 |
| E1 | GY   | 5B | AX.89524656 | 6.43E+08 | 0.11 | -3.67  | 3.08 | 0.05 |
| E1 | GY   | 5B | AX.89339124 | 5.86E+08 | 0.33 | 2.51   | 3.29 | 0.04 |
| E1 | GY   | 5B | AX.89768576 | 4.79E+08 | 0.05 | -5.21  | 3.14 | 0.05 |
| E1 | GY   | 5B | AX.89678549 | 1.98E+07 | 0.18 | -3.24  | 3.62 | 0.05 |
| E1 | GY   | 5B | AX.89577810 | 5.81E+08 | 0.24 | 2.67   | 3.12 | 0.03 |
| E1 | GY   | 5B | AX.89622545 | 6.36E+08 | 0.34 | 2.45   | 3.19 | 0.05 |
| E1 | GY   | 5B | AX.89622171 | 1.11E+07 | 0.17 | -3.31  | 3.62 | 0.05 |
| E1 | GY   | 5B | AX.89708766 | 4.79E+08 | 0.05 | -5.21  | 3.14 | 0.05 |
| E1 | GY   | 5B | AX.89518064 | 4.79E+08 | 0.05 | -5.21  | 3.14 | 0.05 |
| E1 | GY   | 5B | AX.89709484 | 6.31E+08 | 0.23 | 2.90   | 3.51 | 0.06 |
| E1 | GY   | 5B | AX.89709484 | 6.31E+08 | 0.23 | 2.90   | 3.51 | 0.06 |
| E1 | GY   | 5B | AX.89376899 | 5.87E+08 | 0.27 | -2.66  | 3.31 | 0.06 |
| E1 | GY   | 5B | AX.89319628 | 2.00E+07 | 0.18 | -3.25  | 3.58 | 0.05 |
| E1 | GY   | 5B | AX.89388133 | 6.32E+08 | 0.27 | 2.74   | 3.46 | 0.06 |
| E1 | GY   | 5B | AX.89744387 | 4.64E+08 | 0.31 | -2.59  | 3.37 | 0.06 |
| E1 | GY   | 5B | AX.89662514 | 4.79E+08 | 0.05 | -5.21  | 3.14 | 0.05 |
| E1 | GY   | 5B | AX.89720865 | 4.79E+08 | 0.05 | -5.21  | 3.14 | 0.05 |
| E1 | GY   | 5B | AX.89654057 | 4.80E+08 | 0.05 | -5.21  | 3.14 | 0.05 |
| E1 | GY   | 5B | AX.89615841 | 2.00E+07 | 0.18 | -3.25  | 3.58 | 0.05 |
| E1 | GY   | 5B | AX.89615841 | 2.00E+07 | 0.18 | -3.25  | 3.58 | 0.05 |
| E1 | GY   | 5B | AX.89413887 | 1.97E+07 | 0.18 | -3.25  | 3.58 | 0.05 |
| E1 | GY   | 5B | AX.89689229 | 6.37E+08 | 0.30 | 3.21   | 4.81 | 0.07 |
| E1 | GY   | 5B | AX.89389594 | 6.36E+08 | 0.34 | 2.45   | 3.19 | 0.05 |
| E1 | GY   | 5B | AX.89772404 | 4.79E+08 | 0.05 | -5.21  | 3.14 | 0.05 |
| E1 | GY   | 5B | AX.89772404 | 4.79E+08 | 0.05 | -5.21  | 3.14 | 0.05 |
| E1 | GY   | 5B | AX.89601860 | 7.03E+08 | 0.06 | -5.33  | 3.49 | 0.07 |
| E1 | GY   | 5B | AX.89651787 | 4.89E+08 | 0.05 | -5.20  | 3.13 | 0.05 |
| E1 | GPS  | 5B | AX.89403059 | 6.85E+08 | 0.06 | -2.37  | 3.12 | 0.05 |
| E1 | GY   | 5B | AX.89680483 | 4.80E+08 | 0.05 | -5.21  | 3.14 | 0.05 |
| E1 | GY   | 5B | AX.89711876 | 1.95E+07 | 0.18 | -3.25  | 3.58 | 0.05 |
| E1 | GY   | 5B | AX.89531514 | 6.34E+08 | 0.28 | 2.62   | 3.28 | 0.05 |
| E1 | GY   | 5B | AX.89486250 | 6.43E+08 | 0.11 | -3.67  | 3.08 | 0.05 |
| E1 | GY   | 5B | AX.89355657 | 5.60E+08 | 0.25 | 2.66   | 3.15 | 0.05 |
| E1 | GY   | 5B | AX.89675642 | 4.80E+08 | 0.05 | -5.21  | 3.14 | 0.05 |
| E1 | GY   | 5B | AX.89461025 | 6.30E+08 | 0.23 | 2.90   | 3.51 | 0.06 |
| E1 | GY   | 5B | AX.89450464 | 5.60E+08 | 0.25 | 2.66   | 3.15 | 0.05 |

|    |      |    |             |          |      |         |      |      |
|----|------|----|-------------|----------|------|---------|------|------|
| E1 | GY   | 5B | AX.89486782 | 6.32E+08 | 0.23 | 2.90    | 3.51 | 0.06 |
| E1 | GY   | 5B | AX.89510136 | 6.32E+08 | 0.27 | 2.59    | 3.15 | 0.06 |
| E1 | GY   | 5B | AX.89392375 | 6.43E+08 | 0.11 | -3.67   | 3.08 | 0.05 |
| E1 | GY   | 5B | AX.89649133 | 4.80E+08 | 0.05 | -5.21   | 3.14 | 0.05 |
| E1 | GY   | 5B | AX.89725988 | 1.98E+07 | 0.18 | -3.25   | 3.58 | 0.05 |
| E1 | GY   | 5B | AX.89439783 | 6.36E+08 | 0.34 | 2.65    | 3.65 | 0.05 |
| E1 | GY   | 5B | AX.89439783 | 6.36E+08 | 0.34 | 2.65    | 3.65 | 0.05 |
| E1 | GY   | 5B | AX.89639321 | 6.35E+08 | 0.28 | 2.62    | 3.28 | 0.05 |
| E1 | GY   | 5B | AX.89702226 | 6.37E+08 | 0.34 | 2.65    | 3.65 | 0.05 |
| E1 | GY   | 5B | AX.89702244 | 6.37E+08 | 0.30 | 2.94    | 4.14 | 0.06 |
| E1 | GY   | 5B | AX.89494884 | 5.60E+08 | 0.25 | 2.66    | 3.15 | 0.05 |
| E1 | GY   | 5B | AX.89475197 | 5.81E+08 | 0.24 | 2.67    | 3.12 | 0.03 |
| E1 | GY   | 5B | AX.89443122 | 5.87E+08 | 0.33 | 2.51    | 3.29 | 0.04 |
| E1 | GY   | 5B | AX.89751210 | 4.79E+08 | 0.05 | -5.21   | 3.14 | 0.05 |
| E1 | GY   | 5B | AX.89751210 | 4.79E+08 | 0.05 | -5.21   | 3.14 | 0.05 |
| E1 | GY   | 5B | AX.89703676 | 6.32E+08 | 0.23 | 2.90    | 3.51 | 0.06 |
| E1 | GY   | 5B | AX.89678593 | 6.42E+08 | 0.11 | -3.67   | 3.08 | 0.05 |
| E1 | GY   | 5B | AX.89403157 | 6.32E+08 | 0.27 | 2.74    | 3.46 | 0.06 |
| E1 | GY   | 5B | AX.89464183 | 6.36E+08 | 0.34 | 2.45    | 3.19 | 0.05 |
| E1 | GY   | 5B | AX.89667390 | 1.97E+07 | 0.18 | -3.25   | 3.58 | 0.05 |
| E1 | GY   | 5B | AX.89536172 | 1.98E+07 | 0.18 | -3.14   | 3.43 | 0.05 |
| E1 | GY   | 5B | AX.89501084 | 1.97E+07 | 0.18 | -3.25   | 3.58 | 0.05 |
| E1 | GY   | 5B | AX.89419694 | 6.93E+08 | 0.06 | -4.93   | 3.26 | 0.07 |
| E1 | GY   | 5B | AX.89419694 | 6.93E+08 | 0.06 | -4.93   | 3.26 | 0.07 |
| E1 | GY   | 5B | AX.89771453 | 4.79E+08 | 0.05 | -5.21   | 3.14 | 0.05 |
| E1 | GY   | 5B | AX.89327601 | 6.31E+08 | 0.23 | 2.90    | 3.51 | 0.06 |
| E1 | GY   | 5B | AX.89466410 | 6.43E+08 | 0.11 | -3.67   | 3.08 | 0.05 |
| E1 | GY   | 5B | AX.89537992 | 1.95E+07 | 0.17 | -3.24   | 3.49 | 0.05 |
| E1 | GY   | 5B | AX.89632393 | 5.86E+08 | 0.34 | 2.54    | 3.40 | 0.04 |
| E1 | GY   | 5B | AX.89362470 | 4.79E+08 | 0.05 | -5.21   | 3.14 | 0.05 |
| E1 | GY   | 5B | AX.89328144 | 4.79E+08 | 0.05 | -5.21   | 3.14 | 0.05 |
| E1 | GY   | 5B | AX.89754983 | 5.62E+08 | 0.31 | 2.53    | 3.25 | 0.05 |
| E1 | GY   | 5B | AX.89754983 | 5.62E+08 | 0.31 | 2.53    | 3.25 | 0.05 |
| E1 | GY   | 5B | AX.89456566 | 4.89E+08 | 0.06 | -4.93   | 3.06 | 0.05 |
| E1 | GY   | 5B | AX.89476512 | 1.95E+07 | 0.18 | -3.25   | 3.58 | 0.05 |
| E1 | GY   | 5B | AX.89476512 | 1.95E+07 | 0.18 | -3.25   | 3.58 | 0.05 |
| E1 | GY   | 5B | AX.89422733 | 6.35E+08 | 0.28 | 2.62    | 3.28 | 0.05 |
| E1 | GY   | 5B | AX.89756842 | 1.13E+07 | 0.17 | -3.31   | 3.62 | 0.05 |
| E1 | GY   | 5B | AX.89457601 | 4.79E+08 | 0.05 | -5.21   | 3.14 | 0.05 |
| E1 | GY   | 5B | AX.89435584 | 4.79E+08 | 0.05 | -5.21   | 3.14 | 0.05 |
| E1 | GY   | 5B | AX.89635436 | 1.14E+07 | 0.17 | -3.31   | 3.62 | 0.05 |
| E1 | GY   | 5B | AX.89635436 | 1.14E+07 | 0.17 | -3.31   | 3.62 | 0.05 |
| E1 | GPM2 | 5B | AX.89405214 | 7.03E+08 | 0.27 | -666.71 | 3.17 | 0.05 |
| E1 | GY   | 5B | AX.89619826 | 4.79E+08 | 0.05 | -5.21   | 3.14 | 0.05 |
| E1 | GY   | 5B | AX.89413298 | 6.30E+08 | 0.23 | 2.90    | 3.51 | 0.06 |
| E1 | GY   | 5B | AX.89726529 | 4.79E+08 | 0.05 | -5.21   | 3.14 | 0.05 |
| E1 | GY   | 5B | AX.89644522 | 6.32E+08 | 0.27 | 2.74    | 3.46 | 0.06 |
| E1 | GY   | 5B | AX.89437256 | 6.32E+08 | 0.23 | 2.90    | 3.51 | 0.06 |
| E1 | GY   | 5B | AX.89723687 | 6.32E+08 | 0.23 | 2.90    | 3.51 | 0.06 |
| E1 | GY   | 5B | AX.89723687 | 6.32E+08 | 0.23 | 2.90    | 3.51 | 0.06 |

|    |      |    |             |          |      |          |      |      |
|----|------|----|-------------|----------|------|----------|------|------|
| E1 | GPM2 | 5B | AX.89381160 | 6.93E+08 | 0.06 | -1246.03 | 3.19 | 0.06 |
| E1 | GPM2 | 5B | AX.89543790 | 6.99E+06 | 0.44 | 608.45   | 3.29 | 0.05 |
| E1 | GY   | 5B | AX.89496756 | 6.36E+08 | 0.34 | 2.45     | 3.19 | 0.05 |
| E1 | GY   | 5B | AX.89704033 | 5.62E+08 | 0.27 | 2.58     | 3.10 | 0.05 |
| E1 | GPM2 | 5B | AX.89686833 | 7.13E+08 | 0.07 | -1297.53 | 4.04 | 0.07 |
| E1 | GY   | 5B | AX.89446263 | 6.37E+08 | 0.25 | 2.89     | 3.65 | 0.05 |
| E1 | GPM2 | 5B | AX.89614903 | 7.12E+08 | 0.07 | -1319.27 | 3.95 | 0.06 |
| E1 | GY   | 5B | AX.89532223 | 6.32E+08 | 0.27 | 2.74     | 3.46 | 0.06 |
| E1 | GPM2 | 5B | AX.89361075 | 4.35E+07 | 0.12 | -883.86  | 3.03 | 0.05 |
| E1 | GY   | 5B | AX.89700614 | 6.32E+08 | 0.27 | 2.67     | 3.35 | 0.06 |
| E1 | GY   | 5B | AX.89704769 | 6.35E+08 | 0.28 | 2.62     | 3.28 | 0.05 |
| E1 | GPM2 | 5B | AX.89331179 | 6.85E+08 | 0.06 | -1215.93 | 3.06 | 0.05 |
| E1 | GY   | 5B | AX.89543790 | 6.99E+06 | 0.44 | 2.27     | 3.03 | 0.05 |
| E1 | SPM2 | 5B | AX.89382950 | 1.32E+07 | 0.30 | -19.51   | 3.58 | 0.06 |
| E1 | GY   | 5B | AX.89544766 | 5.60E+08 | 0.25 | 2.66     | 3.15 | 0.05 |
| E1 | GPM2 | 5B | AX.89382361 | 7.13E+08 | 0.08 | -1228.47 | 3.85 | 0.06 |
| E1 | GPM2 | 5B | AX.89421361 | 7.12E+08 | 0.07 | -1297.53 | 4.04 | 0.07 |
| E1 | GPM2 | 5B | AX.89593207 | 7.12E+08 | 0.07 | -1319.27 | 3.95 | 0.06 |
| E1 | GPM2 | 5B | AX.89315634 | 6.85E+08 | 0.07 | -1224.56 | 3.65 | 0.06 |
| E1 | GPM2 | 5B | AX.89588192 | 5.86E+08 | 0.35 | 606.79   | 3.06 | 0.04 |
| E1 | GY   | 5B | AX.89617598 | 6.35E+08 | 0.28 | 2.62     | 3.28 | 0.05 |
| E1 | GY   | 5B | AX.89485770 | 1.13E+07 | 0.17 | -3.31    | 3.62 | 0.05 |
| E1 | GY   | 5B | AX.89441811 | 1.98E+07 | 0.18 | -3.25    | 3.58 | 0.05 |
| E1 | GPS  | 5B | AX.89382950 | 1.32E+07 | 0.30 | 1.57     | 4.74 | 0.09 |
| E1 | GPM2 | 5B | AX.89573389 | 7.12E+08 | 0.07 | -1319.27 | 3.95 | 0.06 |
| E1 | GPM2 | 5B | AX.89655262 | 7.03E+08 | 0.29 | -662.60  | 3.27 | 0.06 |
| E1 | GY   | 5B | AX.89582777 | 4.79E+08 | 0.05 | -5.21    | 3.14 | 0.05 |
| E1 | GY   | 5B | AX.89536258 | 6.43E+08 | 0.11 | -3.67    | 3.08 | 0.05 |
| E1 | GY   | 5B | AX.89372325 | 6.34E+08 | 0.28 | 2.62     | 3.28 | 0.05 |
| E1 | GPS  | 5B | AX.89439896 | 1.32E+07 | 0.29 | 1.41     | 3.87 | 0.07 |
| E1 | GY   | 5B | AX.89571058 | 1.95E+07 | 0.17 | -3.18    | 3.39 | 0.05 |
| E1 | GPM2 | 5B | AX.89390726 | 6.85E+08 | 0.06 | -1215.93 | 3.06 | 0.05 |
| E1 | GPM2 | 5B | AX.89463027 | 7.03E+08 | 0.30 | -710.32  | 3.72 | 0.06 |
| E1 | GY   | 5B | AX.89701440 | 1.98E+07 | 0.18 | -3.25    | 3.58 | 0.05 |
| E1 | GY   | 5B | AX.89337552 | 5.87E+08 | 0.27 | -2.62    | 3.20 | 0.06 |
| E1 | GY   | 5B | AX.89730035 | 5.42E+08 | 0.11 | 3.73     | 3.25 | 0.06 |
| E1 | GPS  | 5B | AX.86170130 | 6.90E+08 | 0.43 | -1.18    | 3.29 | 0.06 |
| E1 | GPS  | 5B | AX.89532549 | 6.86E+08 | 0.06 | -2.59    | 3.40 | 0.06 |
| E1 | GY   | 5B | AX.89652951 | 1.15E+07 | 0.18 | -3.14    | 3.38 | 0.05 |
| E1 | GY   | 5B | AX.89705205 | 5.83E+08 | 0.40 | 2.54     | 3.58 | 0.06 |
| E1 | GPM2 | 5B | AX.89532549 | 6.86E+08 | 0.06 | -1263.08 | 3.06 | 0.05 |
| E1 | GPS  | 5B | AX.89388779 | 1.32E+07 | 0.29 | 1.54     | 4.51 | 0.08 |
| E1 | GPM2 | 5B | AX.89353411 | 6.85E+08 | 0.07 | -1224.56 | 3.65 | 0.06 |
| E1 | GY   | 5B | AX.89621509 | 4.55E+08 | 0.23 | -2.80    | 3.26 | 0.06 |
| E1 | GPM2 | 5B | AX.89668970 | 6.84E+06 | 0.40 | 628.84   | 3.40 | 0.05 |
| E1 | GY   | 5B | AX.89481359 | 4.79E+08 | 0.05 | -5.21    | 3.14 | 0.05 |
| E1 | GY   | 5B | AX.89481359 | 4.79E+08 | 0.05 | -5.21    | 3.14 | 0.05 |
| E1 | GPM2 | 5B | AX.89433479 | 7.13E+08 | 0.07 | -1319.27 | 3.95 | 0.06 |
| E1 | GY   | 5B | AX.89550379 | 5.60E+08 | 0.25 | 2.66     | 3.15 | 0.05 |
| E1 | GY   | 5B | AX.89550379 | 5.60E+08 | 0.25 | 2.66     | 3.15 | 0.05 |

|    |      |    |             |          |      |          |      |      |
|----|------|----|-------------|----------|------|----------|------|------|
| E1 | GY   | 5B | AX.89517273 | 6.43E+08 | 0.11 | -3.67    | 3.08 | 0.05 |
| E1 | GPM2 | 5B | AX.89325602 | 6.93E+08 | 0.25 | -863.09  | 4.71 | 0.09 |
| E1 | GPS  | 5B | AX.89631532 | 6.85E+08 | 0.06 | -2.37    | 3.12 | 0.05 |
| E1 | GPS  | 5B | AX.89323712 | 1.32E+07 | 0.48 | -1.23    | 3.62 | 0.06 |
| E1 | GY   | 5B | AX.89650284 | 6.34E+08 | 0.28 | 2.62     | 3.28 | 0.05 |
| E1 | GPS  | 5B | AX.89513907 | 1.32E+07 | 0.29 | 1.48     | 4.18 | 0.07 |
| E1 | GPM2 | 5B | AX.89638955 | 7.03E+08 | 0.28 | -834.01  | 4.76 | 0.09 |
| E1 | GY   | 5B | AX.89630915 | 5.62E+08 | 0.33 | 2.49     | 3.23 | 0.05 |
| E1 | GY   | 5B | AX.89753098 | 4.79E+08 | 0.05 | -5.21    | 3.14 | 0.05 |
| E1 | GPS  | 5B | AX.89651787 | 4.89E+08 | 0.05 | -2.55    | 3.09 | 0.05 |
| E1 | GY   | 5B | AX.89542131 | 6.36E+08 | 0.27 | 2.99     | 4.06 | 0.06 |
| E1 | GY   | 5B | AX.89552577 | 4.79E+08 | 0.05 | -5.21    | 3.14 | 0.05 |
| E1 | GPM2 | 5B | AX.89675505 | 7.12E+08 | 0.07 | -1297.53 | 4.04 | 0.07 |
| E1 | GPS  | 5B | AX.89327121 | 6.85E+08 | 0.06 | -2.37    | 3.12 | 0.05 |
| E1 | GPM2 | 5B | AX.89337872 | 7.13E+08 | 0.07 | -1319.27 | 3.95 | 0.06 |
| E1 | GPS  | 5B | AX.86166457 | 6.85E+08 | 0.07 | -2.37    | 3.32 | 0.06 |
| E1 | GY   | 5B | AX.89732001 | 6.36E+08 | 0.34 | 2.45     | 3.19 | 0.05 |
| E1 | GY   | 5B | AX.89732001 | 6.36E+08 | 0.34 | 2.45     | 3.19 | 0.05 |
| E1 | GPM2 | 5B | AX.89338561 | 4.43E+08 | 0.44 | 707.18   | 4.26 | 0.08 |
| E1 | GPS  | 5B | AX.89331179 | 6.85E+08 | 0.06 | -2.37    | 3.12 | 0.05 |
| E1 | GY   | 5B | AX.89590734 | 5.61E+08 | 0.25 | 2.66     | 3.15 | 0.05 |
| E1 | GPS  | 5B | AX.89423781 | 1.32E+07 | 0.29 | 1.48     | 4.18 | 0.07 |
| E1 | GY   | 5B | AX.89508910 | 6.32E+08 | 0.23 | 2.90     | 3.51 | 0.06 |
| E1 | GY   | 5B | AX.89653910 | 5.81E+08 | 0.24 | 2.67     | 3.12 | 0.03 |
| E1 | GY   | 5B | AX.89646283 | 4.80E+08 | 0.05 | -5.21    | 3.14 | 0.05 |
| E1 | GY   | 5B | AX.89646283 | 4.80E+08 | 0.05 | -5.21    | 3.14 | 0.05 |
| E1 | GY   | 5B | AX.89700391 | 4.79E+08 | 0.05 | -5.21    | 3.14 | 0.05 |
| E1 | GY   | 5B | AX.89700391 | 4.79E+08 | 0.05 | -5.21    | 3.14 | 0.05 |
| E1 | GPM2 | 5B | AX.89608007 | 7.13E+08 | 0.07 | -1319.27 | 3.95 | 0.06 |
| E1 | GY   | 5B | AX.89641096 | 4.79E+08 | 0.05 | -5.21    | 3.14 | 0.05 |
| E1 | GPM2 | 5B | AX.89551934 | 4.49E+07 | 0.40 | -594.78  | 3.10 | 0.05 |
| E1 | GPM2 | 5B | AX.89592632 | 6.65E+06 | 0.40 | 590.53   | 3.04 | 0.05 |
| E1 | GPM2 | 5B | AX.89344908 | 5.87E+08 | 0.09 | -1029.36 | 3.23 | 0.05 |
| E1 | GY   | 5B | AX.89498476 | 6.36E+08 | 0.30 | 2.94     | 4.14 | 0.06 |
| E1 | GY   | 5B | AX.89648556 | 6.32E+08 | 0.27 | 2.74     | 3.46 | 0.06 |
| E1 | GY   | 5B | AX.89653037 | 6.32E+08 | 0.27 | 2.74     | 3.46 | 0.06 |
| E1 | GY   | 5B | AX.89653037 | 6.32E+08 | 0.27 | 2.74     | 3.46 | 0.06 |
| E1 | GPS  | 5B | AX.89638155 | 1.32E+07 | 0.29 | 1.48     | 4.18 | 0.07 |
| E1 | GPS  | 5B | AX.89623198 | 4.89E+08 | 0.05 | -2.55    | 3.09 | 0.05 |
| E1 | GPM2 | 5B | AX.89751183 | 6.85E+08 | 0.07 | -1224.56 | 3.65 | 0.06 |
| E1 | GPS  | 5B | AX.89489374 | 1.32E+07 | 0.29 | 1.49     | 4.26 | 0.08 |
| E1 | GY   | 5B | AX.89655934 | 6.36E+08 | 0.34 | 2.45     | 3.19 | 0.05 |
| E1 | GPS  | 5B | AX.89350220 | 4.89E+08 | 0.05 | -2.55    | 3.09 | 0.05 |
| E1 | GPS  | 5B | AX.89497888 | 4.89E+08 | 0.05 | -2.55    | 3.09 | 0.05 |
| E1 | GPS  | 5B | AX.89456923 | 6.86E+08 | 0.06 | -2.59    | 3.40 | 0.06 |
| E1 | GPM2 | 5B | AX.89370717 | 7.04E+08 | 0.28 | -876.57  | 5.25 | 0.10 |
| E1 | GPM2 | 5B | AX.89371209 | 6.37E+08 | 0.30 | 658.72   | 3.27 | 0.05 |
| E1 | GPM2 | 5B | AX.89695965 | 7.12E+08 | 0.07 | -1319.27 | 3.95 | 0.06 |
| E1 | GY   | 5B | AX.89635785 | 6.99E+06 | 0.39 | 2.40     | 3.24 | 0.05 |
| E1 | GY   | 5B | AX.89635785 | 6.99E+06 | 0.39 | 2.40     | 3.24 | 0.05 |

|    |      |    |             |          |      |          |      |      |
|----|------|----|-------------|----------|------|----------|------|------|
| E1 | GPS  | 5B | AX.89412840 | 6.90E+08 | 0.38 | -1.25    | 3.52 | 0.06 |
| E1 | GPM2 | 5B | AX.89752582 | 6.85E+08 | 0.06 | -1215.93 | 3.06 | 0.05 |
| E1 | GPS  | 5B | AX.89454762 | 6.90E+08 | 0.42 | -1.14    | 3.08 | 0.05 |
| E1 | GY   | 5B | AX.89638955 | 7.03E+08 | 0.28 | -3.27    | 4.80 | 0.09 |
| E1 | GY   | 5B | AX.89532955 | 1.97E+07 | 0.18 | -3.25    | 3.58 | 0.05 |
| E1 | GPM2 | 5B | AX.89504076 | 7.03E+08 | 0.07 | -1329.59 | 4.00 | 0.08 |
| E1 | GY   | 5B | AX.89514611 | 6.37E+08 | 0.34 | 2.45     | 3.19 | 0.05 |
| E1 | GPM2 | 5B | AX.89627627 | 6.68E+06 | 0.40 | 628.84   | 3.40 | 0.05 |
| E1 | GY   | 5B | AX.89774719 | 6.35E+08 | 0.29 | 2.57     | 3.21 | 0.05 |
| E1 | GPM2 | 5B | AX.89764433 | 6.94E+08 | 0.05 | -1358.81 | 3.23 | 0.05 |
| E1 | GPM2 | 5B | AX.89465129 | 7.03E+08 | 0.26 | -667.56  | 3.12 | 0.05 |
| E1 | GPM2 | 5B | AX.89682564 | 7.13E+08 | 0.07 | -1297.53 | 4.04 | 0.07 |
| E1 | GY   | 5B | AX.89561097 | 5.62E+08 | 0.27 | 2.62     | 3.21 | 0.05 |
| E1 | GPM2 | 5B | AX.89392333 | 6.85E+08 | 0.06 | -1215.93 | 3.06 | 0.05 |
| E1 | GY   | 5B | AX.89456230 | 6.35E+08 | 0.29 | 2.57     | 3.21 | 0.05 |
| E1 | GY   | 5B | AX.89504076 | 7.03E+08 | 0.07 | -4.77    | 3.45 | 0.07 |
| E1 | GPM2 | 5B | AX.89713196 | 4.32E+07 | 0.13 | -894.74  | 3.35 | 0.06 |
| E1 | GPM2 | 5B | AX.89393248 | 6.65E+06 | 0.40 | 616.06   | 3.29 | 0.05 |
| E1 | GPM2 | 5B | AX.89420449 | 6.85E+08 | 0.07 | -1226.80 | 3.48 | 0.06 |
| E1 | GY   | 5B | AX.89678549 | 1.98E+07 | 0.18 | -3.24    | 3.62 | 0.05 |
| E1 | GPM2 | 5B | AX.89594998 | 7.03E+08 | 0.28 | -824.79  | 4.67 | 0.08 |
| E1 | GPM2 | 5B | AX.89708564 | 6.85E+08 | 0.07 | -1224.56 | 3.65 | 0.06 |
| E1 | GY   | 5B | AX.89680483 | 4.80E+08 | 0.05 | -5.21    | 3.14 | 0.05 |
| E1 | GPM2 | 5B | AX.89456923 | 6.86E+08 | 0.06 | -1263.08 | 3.06 | 0.05 |
| E1 | GY   | 5B | AX.89622171 | 1.11E+07 | 0.17 | -3.31    | 3.62 | 0.05 |
| E1 | GY   | 5B | AX.89518064 | 4.79E+08 | 0.05 | -5.21    | 3.14 | 0.05 |
| E1 | GPM2 | 5B | AX.89689229 | 6.37E+08 | 0.30 | 658.72   | 3.27 | 0.05 |
| E1 | GY   | 5B | AX.89600633 | 1.15E+07 | 0.18 | -3.14    | 3.38 | 0.05 |
| E1 | GPM2 | 5B | AX.89593309 | 6.84E+06 | 0.41 | 592.86   | 3.09 | 0.05 |
| E1 | GPM2 | 5B | AX.89434733 | 4.28E+07 | 0.12 | -883.86  | 3.03 | 0.05 |
| E1 | GPM2 | 5B | AX.89724475 | 7.12E+08 | 0.07 | -1319.27 | 3.95 | 0.06 |
| E1 | GY   | 5B | AX.89744387 | 4.64E+08 | 0.31 | -2.59    | 3.37 | 0.06 |
| E1 | GY   | 5B | AX.89516752 | 1.97E+07 | 0.18 | -3.25    | 3.58 | 0.05 |
| E1 | GY   | 5B | AX.89654987 | 1.97E+07 | 0.18 | -3.25    | 3.58 | 0.05 |
| E1 | GPM2 | 5B | AX.89756590 | 7.12E+08 | 0.05 | -1303.20 | 3.01 | 0.05 |
| E1 | GY   | 5B | AX.89424748 | 1.13E+07 | 0.17 | -3.31    | 3.62 | 0.05 |
| E1 | GY   | 5B | AX.89689229 | 6.37E+08 | 0.30 | 3.21     | 4.81 | 0.07 |
| E1 | GPM2 | 5B | AX.89776636 | 7.03E+08 | 0.26 | -667.56  | 3.12 | 0.05 |
| E1 | GPM2 | 5B | AX.89728284 | 7.12E+08 | 0.07 | -1297.53 | 4.04 | 0.07 |
| E1 | GY   | 5B | AX.89651787 | 4.89E+08 | 0.05 | -5.20    | 3.13 | 0.05 |
| E1 | GPM2 | 5B | AX.89454797 | 7.12E+08 | 0.07 | -1319.27 | 3.95 | 0.06 |
| E1 | GY   | 5B | AX.89680483 | 4.80E+08 | 0.05 | -5.21    | 3.14 | 0.05 |
| E1 | GPM2 | 5B | AX.89658465 | 7.12E+08 | 0.07 | -1362.37 | 3.95 | 0.06 |
| E1 | GPM2 | 5B | AX.89499258 | 5.87E+08 | 0.09 | -1029.36 | 3.23 | 0.05 |
| E1 | GPM2 | 5B | AX.89600504 | 6.86E+08 | 0.06 | -1263.08 | 3.06 | 0.05 |
| E1 | GY   | 5B | AX.89450464 | 5.60E+08 | 0.25 | 2.66     | 3.15 | 0.05 |
| E1 | GY   | 5B | AX.89322854 | 1.13E+07 | 0.17 | -3.31    | 3.62 | 0.05 |
| E1 | GY   | 5B | AX.89638418 | 4.79E+08 | 0.05 | -5.21    | 3.14 | 0.05 |
| E1 | GY   | 5B | AX.89392375 | 6.43E+08 | 0.11 | -3.67    | 3.08 | 0.05 |
| E1 | GY   | 5B | AX.89702244 | 6.37E+08 | 0.30 | 2.94     | 4.14 | 0.06 |

|    |      |    |             |          |      |          |      |      |
|----|------|----|-------------|----------|------|----------|------|------|
| E1 | GY   | 5B | AX.89738550 | 6.37E+08 | 0.34 | 2.45     | 3.19 | 0.05 |
| E1 | GY   | 5B | AX.89714399 | 1.15E+07 | 0.18 | -3.14    | 3.38 | 0.05 |
| E1 | GY   | 5B | AX.89702322 | 6.37E+08 | 0.34 | 2.99     | 4.54 | 0.07 |
| E1 | GY   | 5B | AX.89381160 | 6.93E+08 | 0.06 | -4.93    | 3.26 | 0.07 |
| E1 | GY   | 5B | AX.89393248 | 6.65E+06 | 0.40 | 2.30     | 3.05 | 0.04 |
| E1 | GY   | 5B | AX.89463041 | 4.66E+08 | 0.06 | -4.72    | 3.02 | 0.05 |
| E1 | GY   | 5B | AX.89703676 | 6.32E+08 | 0.23 | 2.90     | 3.51 | 0.06 |
| E1 | GY   | 5B | AX.89678593 | 6.42E+08 | 0.11 | -3.67    | 3.08 | 0.05 |
| E1 | GY   | 5B | AX.89630366 | 7.04E+08 | 0.07 | -4.78    | 3.46 | 0.07 |
| E1 | GY   | 5B | AX.89516768 | 4.79E+08 | 0.05 | -5.21    | 3.14 | 0.05 |
| E1 | GY   | 5B | AX.89329613 | 1.97E+07 | 0.18 | -3.25    | 3.58 | 0.05 |
| E1 | GY   | 5B | AX.89457601 | 4.79E+08 | 0.05 | -5.21    | 3.14 | 0.05 |
| E1 | GPM2 | 5B | AX.89716929 | 6.85E+08 | 0.07 | -1224.56 | 3.65 | 0.06 |
| E1 | GY   | 5B | AX.89623198 | 4.89E+08 | 0.05 | -5.20    | 3.13 | 0.05 |
| E1 | GY   | 5B | AX.89689204 | 1.95E+07 | 0.22 | -3.13    | 3.91 | 0.07 |
| E1 | GY   | 5B | AX.89689204 | 1.95E+07 | 0.22 | -3.13    | 3.91 | 0.07 |
| E1 | GPM2 | 5B | AX.89763715 | 3.86E+07 | 0.25 | -677.97  | 3.10 | 0.05 |
| E1 | GPM2 | 5B | AX.89734563 | 6.85E+08 | 0.06 | -1215.93 | 3.06 | 0.05 |
| E1 | GPM2 | 5B | AX.89646040 | 7.12E+08 | 0.07 | -1319.27 | 3.95 | 0.06 |
| E1 | GY   | 5B | AX.89700614 | 6.32E+08 | 0.27 | 2.67     | 3.35 | 0.06 |
| E1 | GPM2 | 5B | AX.89505750 | 7.03E+08 | 0.26 | -667.56  | 3.12 | 0.05 |
| E1 | GPM2 | 5B | AX.89631532 | 6.85E+08 | 0.06 | -1215.93 | 3.06 | 0.05 |
| E1 | GPM2 | 5B | AX.89421958 | 7.12E+08 | 0.07 | -1319.27 | 3.95 | 0.06 |
| E1 | GPM2 | 5B | AX.89479246 | 6.86E+08 | 0.06 | -1263.08 | 3.06 | 0.05 |
| E1 | GY   | 5B | AX.89631907 | 6.36E+08 | 0.33 | 2.70     | 3.71 | 0.06 |
| E1 | GPM2 | 5B | AX.89501784 | 7.12E+08 | 0.07 | -1319.27 | 3.95 | 0.06 |
| E1 | GPM2 | 5B | AX.89734081 | 7.13E+08 | 0.06 | -1571.45 | 4.47 | 0.07 |
| E1 | GY   | 5B | AX.89617598 | 6.35E+08 | 0.28 | 2.62     | 3.28 | 0.05 |
| E1 | GY   | 5B | AX.89655262 | 7.03E+08 | 0.29 | -2.58    | 3.26 | 0.06 |
| E1 | GPS  | 5B | AX.89390726 | 6.85E+08 | 0.06 | -2.37    | 3.12 | 0.05 |
| E1 | GPM2 | 5B | AX.89543476 | 6.85E+08 | 0.07 | -1266.62 | 3.48 | 0.06 |
| E1 | GY   | 5B | AX.89501286 | 7.43E+07 | 0.47 | 2.31     | 3.16 | 0.06 |
| E1 | GY   | 5B | AX.89718577 | 5.86E+08 | 0.34 | 2.54     | 3.40 | 0.04 |
| E1 | GY   | 5B | AX.89652951 | 1.15E+07 | 0.18 | -3.14    | 3.38 | 0.05 |
| E1 | GY   | 5B | AX.89644485 | 1.98E+07 | 0.18 | -3.25    | 3.58 | 0.05 |
| E1 | GY   | 5B | AX.89759768 | 5.62E+08 | 0.33 | 2.45     | 3.14 | 0.05 |
| E1 | GPM2 | 5B | AX.86166457 | 6.85E+08 | 0.07 | -1266.62 | 3.48 | 0.06 |
| E1 | GPS  | 5B | AX.89504388 | 1.32E+07 | 0.29 | 1.53     | 4.50 | 0.08 |
| E1 | GPS  | 5B | AX.89772432 | 1.32E+07 | 0.30 | 1.57     | 4.74 | 0.09 |
| E1 | GPS  | 5B | AX.89752582 | 6.85E+08 | 0.06 | -2.37    | 3.12 | 0.05 |
| E1 | GPS  | 5B | AX.89351668 | 4.89E+08 | 0.05 | -2.55    | 3.09 | 0.05 |
| E1 | GY   | 5B | AX.89658736 | 4.79E+08 | 0.05 | -5.21    | 3.14 | 0.05 |
| E1 | GPM2 | 5B | AX.89403059 | 6.85E+08 | 0.06 | -1215.93 | 3.06 | 0.05 |
| E1 | GPM2 | 5B | AX.89450444 | 6.67E+06 | 0.40 | 628.84   | 3.40 | 0.05 |
| E1 | GY   | 5B | AX.89753098 | 4.79E+08 | 0.05 | -5.21    | 3.14 | 0.05 |
| E1 | GY   | 5B | AX.89447298 | 2.00E+07 | 0.18 | -3.25    | 3.58 | 0.05 |
| E1 | GPM2 | 5B | AX.89469201 | 6.85E+08 | 0.07 | -1224.56 | 3.65 | 0.06 |
| E1 | GPM2 | 5B | AX.89632104 | 4.10E+07 | 0.25 | -737.37  | 3.58 | 0.06 |
| E1 | GPM2 | 5B | AX.89328074 | 7.12E+08 | 0.07 | -1319.27 | 3.95 | 0.06 |
| E1 | GPM2 | 5B | AX.89747062 | 7.12E+08 | 0.07 | -1297.53 | 4.04 | 0.07 |

|    |      |    |             |          |      |          |      |      |
|----|------|----|-------------|----------|------|----------|------|------|
| E1 | GPM2 | 5B | AX.89390507 | 7.12E+08 | 0.07 | -1319.27 | 3.95 | 0.06 |
| E1 | GPM2 | 5B | AX.89494775 | 7.12E+08 | 0.07 | -1297.53 | 4.04 | 0.07 |
| E1 | GPM2 | 5B | AX.89327121 | 6.85E+08 | 0.06 | -1215.93 | 3.06 | 0.05 |
| E1 | GPM2 | 5B | AX.89525026 | 4.28E+07 | 0.12 | -883.86  | 3.03 | 0.05 |
| E1 | GPS  | 5B | AX.89636160 | 4.89E+08 | 0.05 | -2.55    | 3.09 | 0.05 |
| E1 | GY   | 5B | AX.89587402 | 6.43E+08 | 0.11 | -3.67    | 3.08 | 0.05 |
| E1 | GPS  | 5B | AX.89420449 | 6.85E+08 | 0.07 | -2.20    | 3.07 | 0.05 |
| E1 | GPM2 | 5B | AX.89763554 | 7.12E+08 | 0.07 | -1319.27 | 3.95 | 0.06 |
| E1 | GY   | 5B | AX.89702287 | 6.20E+08 | 0.24 | 3.04     | 3.89 | 0.07 |
| E1 | GPM2 | 5B | AX.89516621 | 7.03E+08 | 0.26 | -667.56  | 3.12 | 0.05 |
| E1 | GPM2 | 5B | AX.89415101 | 7.13E+08 | 0.07 | -1319.27 | 3.95 | 0.06 |
| E1 | GPS  | 5B | AX.89365622 | 6.90E+08 | 0.38 | -1.25    | 3.52 | 0.06 |
| E1 | GPM2 | 5B | AX.89756817 | 7.13E+08 | 0.07 | -1319.27 | 3.95 | 0.06 |
| E1 | GY   | 5B | AX.89608793 | 6.43E+08 | 0.11 | -3.67    | 3.08 | 0.05 |
| E1 | TKW  | 5B | AX.89532063 | 4.61E+08 | 0.08 | -1.56    | 3.22 | 0.05 |
| E1 | GY   | 5B | AX.89675139 | 6.32E+08 | 0.27 | 2.74     | 3.46 | 0.06 |
| E1 | GPM2 | 5B | AX.89380715 | 6.93E+08 | 0.24 | -833.76  | 4.39 | 0.08 |
| E1 | GPM2 | 5B | AX.89314809 | 7.12E+08 | 0.07 | -1319.27 | 3.95 | 0.06 |
| E1 | GY   | 5B | AX.89679245 | 4.80E+08 | 0.05 | -5.21    | 3.14 | 0.05 |
| E1 | GPM2 | 5B | AX.89419694 | 6.93E+08 | 0.06 | -1246.03 | 3.19 | 0.06 |
| E1 | GY   | 5B | AX.89515226 | 6.35E+08 | 0.28 | 2.62     | 3.28 | 0.05 |
| E1 | TKW  | 5B | AX.89668374 | 3.15E+08 | 0.21 | -1.02    | 3.03 | 0.05 |
| E1 | GPM2 | 5B | AX.89328007 | 7.03E+08 | 0.27 | -666.71  | 3.17 | 0.05 |
| E1 | GPM2 | 5B | AX.89723531 | 7.12E+08 | 0.07 | -1319.27 | 3.95 | 0.06 |
| E1 | GPM2 | 5B | AX.89462390 | 4.28E+07 | 0.12 | -883.86  | 3.03 | 0.05 |
| E1 | TKW  | 5B | AX.89432218 | 6.23E+08 | 0.13 | -1.26    | 3.23 | 0.05 |
| E1 | GPM2 | 5B | AX.89732027 | 7.03E+08 | 0.27 | -666.71  | 3.17 | 0.05 |
| E1 | GY   | 5B | AX.89669309 | 4.79E+08 | 0.05 | -5.21    | 3.14 | 0.05 |
| E1 | GPM2 | 5B | AX.89454370 | 7.12E+08 | 0.07 | -1319.27 | 3.95 | 0.06 |
| E1 | GPM2 | 5B | AX.89313461 | 7.03E+08 | 0.05 | -1306.05 | 3.02 | 0.06 |
| E1 | TKW  | 5B | AX.89506309 | 4.59E+08 | 0.07 | -1.72    | 3.32 | 0.06 |
| E1 | GY   | 5B | AX.89756842 | 1.13E+07 | 0.17 | -3.31    | 3.62 | 0.05 |
| E1 | GPM2 | 5B | AX.89739979 | 7.13E+08 | 0.07 | -1319.27 | 3.95 | 0.06 |
| E1 | TKW  | 5B | AX.89746258 | 6.23E+08 | 0.13 | -1.26    | 3.23 | 0.05 |
| E1 | GPM2 | 5B | AX.89635785 | 6.99E+06 | 0.39 | 615.51   | 3.25 | 0.05 |
| E1 | GPM2 | 5B | AX.89575415 | 6.93E+08 | 0.06 | -1246.03 | 3.19 | 0.06 |
| E1 | TKW  | 5B | AX.89435338 | 4.60E+08 | 0.08 | -1.56    | 3.22 | 0.05 |
| E1 | GY   | 5B | AX.89720865 | 4.79E+08 | 0.05 | -5.21    | 3.14 | 0.05 |
| E1 | GY   | 5B | AX.89654987 | 1.97E+07 | 0.18 | -3.25    | 3.58 | 0.05 |
| E1 | GPM2 | 5B | AX.89332853 | 4.23E+07 | 0.13 | -918.80  | 3.42 | 0.06 |
| E1 | TKW  | 5B | AX.89497439 | 4.61E+08 | 0.08 | -1.56    | 3.22 | 0.05 |
| E1 | TKW  | 5B | AX.89412840 | 6.90E+08 | 0.38 | 0.89     | 3.21 | 0.05 |
| E1 | GPM2 | 5B | AX.89697602 | 6.85E+08 | 0.08 | -1091.09 | 3.29 | 0.05 |
| E1 | TKW  | 5B | AX.89425960 | 4.61E+08 | 0.08 | -1.56    | 3.22 | 0.05 |
| E1 | GY   | 5B | AX.89567072 | 1.14E+07 | 0.17 | -3.31    | 3.62 | 0.05 |
| E1 | GY   | 5B | AX.89486782 | 6.32E+08 | 0.23 | 2.90     | 3.51 | 0.06 |
| E1 | TKW  | 5B | AX.89314375 | 6.22E+08 | 0.13 | -1.26    | 3.06 | 0.05 |
| E1 | GY   | 5B | AX.89702322 | 6.37E+08 | 0.34 | 2.99     | 4.54 | 0.07 |
| E1 | TKW  | 5B | AX.89386002 | 4.61E+08 | 0.08 | -1.56    | 3.22 | 0.05 |
| E1 | TKW  | 5B | AX.89424190 | 4.61E+08 | 0.08 | -1.56    | 3.22 | 0.05 |



|    |      |    |             |          |      |          |      |      |
|----|------|----|-------------|----------|------|----------|------|------|
| E1 | TKW  | 5B | AX.89415645 | 4.61E+08 | 0.08 | -1.56    | 3.22 | 0.05 |
| E1 | GY   | 5B | AX.89644522 | 6.32E+08 | 0.27 | 2.74     | 3.46 | 0.06 |
| E1 | TKW  | 5B | AX.89650328 | 4.61E+08 | 0.08 | -1.56    | 3.22 | 0.05 |
| E1 | TKW  | 5B | AX.89698901 | 4.61E+08 | 0.08 | -1.56    | 3.22 | 0.05 |
| E1 | GPM2 | 5B | AX.89557890 | 5.87E+08 | 0.09 | -1029.36 | 3.23 | 0.05 |
| E1 | GPM2 | 5B | AX.89356496 | 7.03E+08 | 0.27 | -666.71  | 3.17 | 0.05 |
| E1 | TKW  | 5B | AX.89365622 | 6.90E+08 | 0.38 | 0.89     | 3.21 | 0.05 |
| E1 | GPM2 | 5B | AX.89501286 | 7.43E+07 | 0.47 | 659.41   | 3.80 | 0.07 |
| E1 | GY   | 5B | AX.89462733 | 1.95E+07 | 0.19 | -3.21    | 3.68 | 0.06 |
| E1 | GPM2 | 5B | AX.89463041 | 4.66E+08 | 0.06 | -1247.48 | 3.20 | 0.05 |
| E1 | TKW  | 5B | AX.89454762 | 6.90E+08 | 0.42 | 0.89     | 3.29 | 0.05 |
| E1 | TKW  | 5B | AX.89366900 | 4.61E+08 | 0.08 | -1.56    | 3.22 | 0.05 |
| E1 | GPM2 | 5B | AX.89364659 | 7.12E+08 | 0.07 | -1319.27 | 3.95 | 0.06 |
| E1 | GY   | 5B | AX.89658736 | 4.79E+08 | 0.05 | -5.21    | 3.14 | 0.05 |
| E1 | GPM2 | 5B | AX.89756512 | 7.13E+08 | 0.07 | -1319.27 | 3.95 | 0.06 |
| E1 | GPM2 | 5B | AX.89652622 | 7.04E+06 | 0.39 | 615.51   | 3.25 | 0.05 |
| E1 | TKW  | 5B | AX.89744863 | 4.60E+08 | 0.08 | -1.56    | 3.22 | 0.05 |
| E1 | TKW  | 5B | AX.89331027 | 3.75E+07 | 0.06 | -1.97    | 3.48 | 0.06 |
| E1 | GPM2 | 5B | AX.89565973 | 7.13E+08 | 0.07 | -1319.27 | 3.95 | 0.06 |
| E1 | TKW  | 5B | AX.89602013 | 4.60E+08 | 0.08 | -1.56    | 3.22 | 0.05 |
| E1 | GPM2 | 5B | AX.89601860 | 7.03E+08 | 0.06 | -1436.94 | 3.82 | 0.07 |
| E1 | GPM2 | 5B | AX.89367647 | 6.67E+06 | 0.40 | 628.84   | 3.40 | 0.05 |
| E2 | GY   | 5B | AX.89499896 | 4.61E+08 | 0.07 | -3.72    | 3.22 | 0.05 |
| E2 | SPM2 | 5B | AX.89655914 | 4.59E+08 | 0.11 | 18.77    | 3.02 | 0.05 |
| E2 | SPM2 | 5B | AX.89625953 | 4.59E+08 | 0.11 | 18.77    | 3.02 | 0.05 |
| E2 | SPM2 | 5B | AX.89420933 | 4.59E+08 | 0.11 | 18.77    | 3.02 | 0.05 |
| E2 | SPM2 | 5B | AX.89353786 | 4.59E+08 | 0.11 | 18.77    | 3.02 | 0.05 |
| E2 | SPM2 | 5B | AX.89421671 | 4.59E+08 | 0.11 | 18.77    | 3.02 | 0.05 |
| E2 | SPM2 | 5B | AX.89476039 | 4.59E+08 | 0.11 | 18.77    | 3.02 | 0.05 |
| E2 | SPM2 | 5B | AX.89364776 | 4.59E+08 | 0.11 | 18.77    | 3.02 | 0.05 |
| E2 | SPM2 | 5B | AX.89544142 | 4.59E+08 | 0.11 | 18.77    | 3.02 | 0.05 |
| E2 | GPM2 | 5B | AX.89532063 | 4.61E+08 | 0.08 | 1062.92  | 4.31 | 0.08 |
| E2 | SPM2 | 5B | AX.89549787 | 6.60E+08 | 0.30 | -13.22   | 3.24 | 0.06 |
| E2 | GY   | 5B | AX.89614362 | 4.78E+08 | 0.06 | -4.52    | 3.52 | 0.06 |
| E2 | SPM2 | 5B | AX.89570478 | 4.59E+08 | 0.11 | 18.77    | 3.02 | 0.05 |
| E2 | SPM2 | 5B | AX.89722558 | 4.59E+08 | 0.11 | 18.77    | 3.02 | 0.05 |
| E2 | SPM2 | 5B | AX.89416929 | 4.59E+08 | 0.11 | 18.77    | 3.02 | 0.05 |
| E2 | SPM2 | 5B | AX.89424256 | 4.59E+08 | 0.11 | 18.77    | 3.02 | 0.05 |
| E2 | SPM2 | 5B | AX.89500255 | 4.59E+08 | 0.11 | 18.77    | 3.02 | 0.05 |
| E2 | SPM2 | 5B | AX.89773672 | 4.59E+08 | 0.11 | 18.77    | 3.02 | 0.05 |
| E2 | GY   | 5B | AX.89514151 | 4.61E+08 | 0.07 | -3.72    | 3.22 | 0.05 |
| E2 | SPM2 | 5B | AX.89322706 | 4.59E+08 | 0.11 | 18.77    | 3.02 | 0.05 |
| E2 | SPM2 | 5B | AX.89664209 | 6.94E+08 | 0.13 | 17.57    | 3.12 | 0.05 |
| E2 | SPM2 | 5B | AX.89541437 | 4.59E+08 | 0.11 | 18.77    | 3.02 | 0.05 |
| E2 | SPM2 | 5B | AX.89608876 | 4.59E+08 | 0.11 | 18.77    | 3.02 | 0.05 |
| E2 | GY   | 5B | AX.89657211 | 4.61E+08 | 0.22 | -2.41    | 3.40 | 0.06 |
| E2 | GY   | 5B | AX.89434025 | 4.60E+08 | 0.23 | -2.46    | 3.55 | 0.06 |
| E2 | GPM2 | 5B | AX.89331405 | 5.47E+08 | 0.36 | -499.45  | 3.01 | 0.05 |
| E2 | GY   | 5B | AX.89376309 | 4.78E+08 | 0.06 | -4.52    | 3.52 | 0.06 |
| E2 | GY   | 5B | AX.89376309 | 4.78E+08 | 0.06 | -4.52    | 3.52 | 0.06 |

|    |      |    |             |          |      |         |      |      |
|----|------|----|-------------|----------|------|---------|------|------|
| E2 | GY   | 5B | AX.89586746 | 4.60E+08 | 0.23 | -2.46   | 3.55 | 0.06 |
| E2 | GY   | 5B | AX.89586746 | 4.60E+08 | 0.23 | -2.46   | 3.55 | 0.06 |
| E2 | GY   | 5B | AX.89661473 | 4.59E+08 | 0.17 | -2.69   | 3.37 | 0.06 |
| E2 | GY   | 5B | AX.89661473 | 4.59E+08 | 0.17 | -2.69   | 3.37 | 0.06 |
| E2 | GY   | 5B | AX.89590361 | 4.60E+08 | 0.23 | -2.46   | 3.55 | 0.06 |
| E2 | GY   | 5B | AX.89590361 | 4.60E+08 | 0.23 | -2.46   | 3.55 | 0.06 |
| E2 | GY   | 5B | AX.89509001 | 4.60E+08 | 0.23 | -2.46   | 3.55 | 0.06 |
| E2 | GY   | 5B | AX.89509001 | 4.60E+08 | 0.23 | -2.46   | 3.55 | 0.06 |
| E2 | GY   | 5B | AX.89461377 | 4.60E+08 | 0.23 | -2.46   | 3.55 | 0.06 |
| E2 | GY   | 5B | AX.89704132 | 4.60E+08 | 0.23 | -2.46   | 3.55 | 0.06 |
| E2 | GY   | 5B | AX.89704132 | 4.60E+08 | 0.23 | -2.46   | 3.55 | 0.06 |
| E2 | GY   | 5B | AX.89346423 | 7.07E+08 | 0.16 | -2.79   | 3.37 | 0.09 |
| E2 | GY   | 5B | AX.89346423 | 7.07E+08 | 0.16 | -2.79   | 3.37 | 0.09 |
| E2 | GY   | 5B | AX.89381655 | 4.66E+08 | 0.05 | -4.72   | 3.57 | 0.06 |
| E2 | GY   | 5B | AX.89381655 | 4.66E+08 | 0.05 | -4.72   | 3.57 | 0.06 |
| E2 | GY   | 5B | AX.89346942 | 6.69E+08 | 0.08 | -3.60   | 3.21 | 0.04 |
| E2 | GY   | 5B | AX.89346942 | 6.69E+08 | 0.08 | -3.60   | 3.21 | 0.04 |
| E2 | GY   | 5B | AX.89516431 | 4.60E+08 | 0.23 | -2.46   | 3.55 | 0.06 |
| E2 | GY   | 5B | AX.89516431 | 4.60E+08 | 0.23 | -2.46   | 3.55 | 0.06 |
| E2 | GY   | 5B | AX.89567569 | 6.69E+08 | 0.12 | -3.09   | 3.40 | 0.04 |
| E2 | GY   | 5B | AX.89567569 | 6.69E+08 | 0.12 | -3.09   | 3.40 | 0.04 |
| E2 | GY   | 5B | AX.89455616 | 4.60E+08 | 0.23 | -2.46   | 3.55 | 0.06 |
| E2 | GY   | 5B | AX.89455616 | 4.60E+08 | 0.23 | -2.46   | 3.55 | 0.06 |
| E2 | GY   | 5B | AX.89422127 | 4.59E+08 | 0.17 | -2.69   | 3.37 | 0.06 |
| E2 | GY   | 5B | AX.89422127 | 4.59E+08 | 0.17 | -2.69   | 3.37 | 0.06 |
| E2 | GPM2 | 5B | AX.89435338 | 4.60E+08 | 0.08 | 1062.92 | 4.31 | 0.08 |
| E2 | GY   | 5B | AX.89718438 | 4.78E+08 | 0.06 | -4.52   | 3.52 | 0.06 |
| E2 | TKW  | 5B | AX.89755554 | 2.42E+08 | 0.15 | -1.38   | 3.15 | 0.06 |
| E2 | GY   | 5B | AX.89461377 | 4.60E+08 | 0.23 | -2.46   | 3.55 | 0.06 |
| E2 | GY   | 5B | AX.89356716 | 6.69E+08 | 0.12 | -3.09   | 3.40 | 0.04 |
| E2 | GY   | 5B | AX.89356716 | 6.69E+08 | 0.12 | -3.09   | 3.40 | 0.04 |
| E2 | GY   | 5B | AX.89606286 | 4.78E+08 | 0.06 | -4.52   | 3.52 | 0.06 |
| E2 | GY   | 5B | AX.89606286 | 4.78E+08 | 0.06 | -4.52   | 3.52 | 0.06 |
| E2 | GY   | 5B | AX.89607893 | 3.73E+08 | 0.07 | -3.65   | 3.12 | 0.05 |
| E2 | GY   | 5B | AX.89607893 | 3.73E+08 | 0.07 | -3.65   | 3.12 | 0.05 |
| E2 | GY   | 5B | AX.89478037 | 4.60E+08 | 0.23 | -2.46   | 3.55 | 0.06 |
| E2 | GY   | 5B | AX.89327642 | 4.62E+08 | 0.21 | -2.70   | 4.02 | 0.07 |
| E2 | GY   | 5B | AX.89327642 | 4.62E+08 | 0.21 | -2.70   | 4.02 | 0.07 |
| E2 | GY   | 5B | AX.89553321 | 4.62E+08 | 0.21 | -2.70   | 4.02 | 0.07 |
| E2 | GY   | 5B | AX.89553321 | 4.62E+08 | 0.21 | -2.70   | 4.02 | 0.07 |
| E2 | GY   | 5B | AX.89499896 | 4.61E+08 | 0.07 | -3.72   | 3.22 | 0.05 |
| E2 | GY   | 5B | AX.89646594 | 4.62E+08 | 0.21 | -2.70   | 4.02 | 0.07 |
| E2 | GY   | 5B | AX.89697318 | 6.69E+08 | 0.13 | -2.99   | 3.49 | 0.04 |
| E2 | GY   | 5B | AX.89697318 | 6.69E+08 | 0.13 | -2.99   | 3.49 | 0.04 |
| E2 | GY   | 5B | AX.89776155 | 4.60E+08 | 0.20 | -2.59   | 3.60 | 0.05 |
| E2 | GY   | 5B | AX.89718438 | 4.78E+08 | 0.06 | -4.52   | 3.52 | 0.06 |
| E2 | TKW  | 5B | AX.89683368 | 6.83E+08 | 0.37 | 1.00    | 3.01 | 0.06 |
| E2 | GY   | 5B | AX.89614362 | 4.78E+08 | 0.06 | -4.52   | 3.52 | 0.06 |
| E2 | GY   | 5B | AX.89566726 | 4.60E+08 | 0.23 | -2.46   | 3.55 | 0.06 |
| E2 | GY   | 5B | AX.89356446 | 4.60E+08 | 0.23 | -2.46   | 3.55 | 0.06 |

|    |      |    |             |          |      |         |      |      |
|----|------|----|-------------|----------|------|---------|------|------|
| E2 | GY   | 5B | AX.89356446 | 4.60E+08 | 0.23 | -2.46   | 3.55 | 0.06 |
| E2 | GY   | 5B | AX.89678817 | 4.60E+08 | 0.23 | -2.22   | 3.02 | 0.05 |
| E2 | GY   | 5B | AX.89431248 | 4.59E+08 | 0.23 | -2.46   | 3.55 | 0.06 |
| E2 | GY   | 5B | AX.89431248 | 4.59E+08 | 0.23 | -2.46   | 3.55 | 0.06 |
| E2 | GY   | 5B | AX.89618438 | 4.61E+08 | 0.07 | -3.72   | 3.22 | 0.05 |
| E2 | GY   | 5B | AX.89514151 | 4.61E+08 | 0.07 | -3.72   | 3.22 | 0.05 |
| E2 | GY   | 5B | AX.89478037 | 4.60E+08 | 0.23 | -2.46   | 3.55 | 0.06 |
| E2 | GPM2 | 5B | AX.89602013 | 4.60E+08 | 0.08 | 1062.92 | 4.31 | 0.08 |
| E2 | GY   | 5B | AX.89657211 | 4.61E+08 | 0.22 | -2.41   | 3.40 | 0.06 |
| E2 | TKW  | 5B | AX.89777083 | 6.82E+08 | 0.31 | 1.12    | 3.44 | 0.07 |
| E2 | GY   | 5B | AX.89434025 | 4.60E+08 | 0.23 | -2.46   | 3.55 | 0.06 |
| E2 | GY   | 5B | AX.89776155 | 4.60E+08 | 0.20 | -2.59   | 3.60 | 0.05 |
| E2 | GPM2 | 5B | AX.89642352 | 5.47E+08 | 0.36 | -500.33 | 3.02 | 0.05 |
| E2 | GY   | 5B | AX.89642265 | 4.61E+08 | 0.23 | -2.46   | 3.55 | 0.06 |
| E2 | GY   | 5B | AX.89642265 | 4.61E+08 | 0.23 | -2.46   | 3.55 | 0.06 |
| E2 | GY   | 5B | AX.89353414 | 4.60E+08 | 0.23 | -2.46   | 3.55 | 0.06 |
| E2 | GY   | 5B | AX.89686617 | 4.61E+08 | 0.23 | -2.50   | 3.65 | 0.07 |
| E2 | GY   | 5B | AX.89686617 | 4.61E+08 | 0.23 | -2.50   | 3.65 | 0.07 |
| E2 | GPS  | 5B | AX.89454016 | 6.64E+08 | 0.15 | -2.03   | 3.51 | 0.07 |
| E2 | GY   | 5B | AX.89427854 | 4.61E+08 | 0.24 | -2.40   | 3.49 | 0.06 |
| E2 | GY   | 5B | AX.89427854 | 4.61E+08 | 0.24 | -2.40   | 3.49 | 0.06 |
| E2 | GY   | 5B | AX.89678817 | 4.60E+08 | 0.23 | -2.22   | 3.02 | 0.05 |
| E2 | GY   | 5B | AX.89752714 | 6.69E+08 | 0.12 | -3.09   | 3.40 | 0.04 |
| E2 | GPM2 | 5B | AX.89465618 | 4.63E+08 | 0.06 | 1021.51 | 3.05 | 0.05 |
| E2 | GPM2 | 5B | AX.89713558 | 5.47E+08 | 0.36 | -500.33 | 3.02 | 0.05 |
| E2 | GPM2 | 5B | AX.89365226 | 4.64E+08 | 0.07 | 1023.60 | 3.25 | 0.05 |
| E2 | GPM2 | 5B | AX.89373215 | 4.61E+08 | 0.08 | 1112.30 | 4.27 | 0.08 |
| E2 | GPM2 | 5B | AX.89754955 | 4.64E+08 | 0.06 | 1021.51 | 3.05 | 0.05 |
| E2 | GY   | 5B | AX.89764514 | 4.62E+08 | 0.21 | -2.70   | 4.02 | 0.07 |
| E2 | TKW  | 5B | AX.89645403 | 1.39E+07 | 0.09 | -1.66   | 3.05 | 0.06 |
| E2 | GY   | 5B | AX.89538284 | 4.60E+08 | 0.23 | -2.46   | 3.55 | 0.06 |
| E2 | GPM2 | 5B | AX.89380376 | 5.47E+08 | 0.36 | -500.33 | 3.02 | 0.05 |
| E2 | GPM2 | 5B | AX.89440851 | 5.47E+08 | 0.36 | -499.45 | 3.01 | 0.05 |
| E2 | TKW  | 5B | AX.89523157 | 6.84E+08 | 0.39 | 1.02    | 3.19 | 0.07 |
| E2 | GPM2 | 5B | AX.89744863 | 4.60E+08 | 0.08 | 1062.92 | 4.31 | 0.08 |
| E2 | GY   | 5B | AX.89353414 | 4.60E+08 | 0.23 | -2.46   | 3.55 | 0.06 |
| E2 | GY   | 5B | AX.89764514 | 4.62E+08 | 0.21 | -2.70   | 4.02 | 0.07 |
| E2 | GPM2 | 5B | AX.89420230 | 5.47E+08 | 0.36 | -500.33 | 3.02 | 0.05 |
| E2 | GY   | 5B | AX.89759980 | 4.78E+08 | 0.06 | -4.52   | 3.52 | 0.06 |
| E2 | GY   | 5B | AX.89519958 | 4.60E+08 | 0.23 | -2.46   | 3.55 | 0.06 |
| E2 | TKW  | 5B | AX.89365622 | 6.90E+08 | 0.38 | 1.00    | 3.08 | 0.06 |
| E2 | GPM2 | 5B | AX.89776439 | 5.47E+08 | 0.34 | -539.22 | 3.39 | 0.05 |
| E2 | GY   | 5B | AX.89704665 | 4.78E+08 | 0.06 | -4.52   | 3.52 | 0.06 |
| E2 | GY   | 5B | AX.89704665 | 4.78E+08 | 0.06 | -4.52   | 3.52 | 0.06 |
| E2 | GY   | 5B | AX.89752714 | 6.69E+08 | 0.12 | -3.09   | 3.40 | 0.04 |
| E2 | GPM2 | 5B | AX.89506309 | 4.59E+08 | 0.07 | 1160.06 | 4.37 | 0.08 |
| E2 | GPS  | 5B | AX.89484565 | 5.57E+08 | 0.39 | 1.42    | 3.32 | 0.05 |
| E2 | GY   | 5B | AX.89681314 | 4.61E+08 | 0.07 | -3.72   | 3.22 | 0.05 |
| E2 | GY   | 5B | AX.89681314 | 4.61E+08 | 0.07 | -3.72   | 3.22 | 0.05 |
| E2 | GY   | 5B | AX.89538284 | 4.60E+08 | 0.23 | -2.46   | 3.55 | 0.06 |

|    |      |    |               |          |      |         |      |      |
|----|------|----|---------------|----------|------|---------|------|------|
| E2 | GY   | 5B | AX.89646594   | 4.62E+08 | 0.21 | -2.70   | 4.02 | 0.07 |
| E2 | GPM2 | 5B | AX.89658797   | 5.47E+08 | 0.36 | -500.33 | 3.02 | 0.05 |
| E2 | GY   | 5B | AX.89759980   | 4.78E+08 | 0.06 | -4.52   | 3.52 | 0.06 |
| E2 | GY   | 5B | AX.89519958   | 4.60E+08 | 0.23 | -2.46   | 3.55 | 0.06 |
| E2 | GPM2 | 5B | AX.89405571   | 4.64E+08 | 0.06 | 1021.51 | 3.05 | 0.05 |
| E2 | GPM2 | 5B | AX.89340142   | 5.47E+08 | 0.36 | -500.33 | 3.02 | 0.05 |
| E2 | GY   | 5B | AX.89566726   | 4.60E+08 | 0.23 | -2.46   | 3.55 | 0.06 |
| E2 | GPM2 | 5B | AX.89366900   | 4.61E+08 | 0.08 | 1062.92 | 4.31 | 0.08 |
| E2 | GPM2 | 5B | AX.89386002   | 4.61E+08 | 0.08 | 1062.92 | 4.31 | 0.08 |
| E2 | GPM2 | 5B | AX.89410892   | 4.63E+08 | 0.06 | 1021.51 | 3.05 | 0.05 |
| E2 | GPM2 | 5B | AX.89526452   | 5.47E+08 | 0.36 | -500.33 | 3.02 | 0.05 |
| E2 | GPM2 | 5B | AX.89586180   | 5.47E+08 | 0.36 | -500.33 | 3.02 | 0.05 |
| E2 | GPM2 | 5B | AX.89415645   | 4.61E+08 | 0.08 | 1062.92 | 4.31 | 0.08 |
| E2 | GY   | 5B | AX.89618438   | 4.61E+08 | 0.07 | -3.72   | 3.22 | 0.05 |
| E2 | GPM2 | 5B | AX.89513465   | 4.63E+08 | 0.06 | 1021.51 | 3.05 | 0.05 |
| E2 | GY   | 5B | AX.89521262   | 4.59E+08 | 0.23 | -2.46   | 3.55 | 0.06 |
| E2 | GY   | 5B | AX.89521262   | 4.59E+08 | 0.23 | -2.46   | 3.55 | 0.06 |
| E2 | TKW  | 5B | AX.89412840   | 6.90E+08 | 0.38 | 1.00    | 3.08 | 0.06 |
| E2 | GPS  | 5B | AX.89560822   | 6.84E+08 | 0.22 | -1.58   | 3.03 | 0.05 |
| E2 | GPM2 | 5B | AX.89698901   | 4.61E+08 | 0.08 | 1062.92 | 4.31 | 0.08 |
| E2 | GY   | 5B | AX.89619002   | 4.62E+08 | 0.21 | -2.70   | 4.02 | 0.07 |
| E2 | GPM2 | 5B | AX.89771463   | 5.47E+08 | 0.35 | -551.97 | 3.57 | 0.06 |
| E2 | GPM2 | 5B | AX.89652234   | 4.63E+08 | 0.06 | 1021.51 | 3.05 | 0.05 |
| E2 | GPM2 | 5B | AX.89402116   | 5.47E+08 | 0.36 | -500.33 | 3.02 | 0.05 |
| E2 | GPM2 | 5B | AX.89686617   | 4.61E+08 | 0.23 | -568.40 | 3.01 | 0.06 |
| E2 | GPM2 | 5B | AX.89650328   | 4.61E+08 | 0.08 | 1062.92 | 4.31 | 0.08 |
| E2 | GPM2 | 5B | AX.89497439   | 4.61E+08 | 0.08 | 1062.92 | 4.31 | 0.08 |
| E2 | GPM2 | 5B | AX.89555546   | 4.63E+08 | 0.06 | 1021.51 | 3.05 | 0.05 |
| E2 | GPM2 | 5B | AX.89553392   | 4.64E+08 | 0.06 | 1021.51 | 3.05 | 0.05 |
| E2 | GY   | 5B | AX.89738953   | 4.78E+08 | 0.06 | -4.52   | 3.52 | 0.06 |
| E2 | GY   | 5B | AX.89738953   | 4.78E+08 | 0.06 | -4.52   | 3.52 | 0.06 |
| E2 | GY   | 5B | AX.89619002   | 4.62E+08 | 0.21 | -2.70   | 4.02 | 0.07 |
| E2 | GPM2 | 5B | AX.89465633   | 4.64E+08 | 0.06 | 1021.51 | 3.05 | 0.05 |
| E2 | GPM2 | 5B | AX.89425960   | 4.61E+08 | 0.08 | 1062.92 | 4.31 | 0.08 |
| E2 | GPM2 | 5B | AX.89424190   | 4.61E+08 | 0.08 | 1062.92 | 4.31 | 0.08 |
| E2 | GPM2 | 5B | AX.89591714   | 5.47E+08 | 0.36 | -500.33 | 3.02 | 0.05 |
| E2 | GPM2 | 5B | AX.89501864   | 4.64E+08 | 0.06 | 1021.51 | 3.05 | 0.05 |
| E3 | GPM2 | 5B | AX.89444793   | 5.48E+07 | 0.06 | 2343.60 | 5.08 | 0.09 |
| E3 | GPM2 | 5B | AX.89569208   | 5.48E+07 | 0.06 | 2343.60 | 5.08 | 0.09 |
| E3 | GPM2 | 5B | AX.89498183   | 5.48E+07 | 0.06 | 2343.60 | 5.08 | 0.09 |
| E3 | GPM2 | 5B | AX.89649075   | 5.48E+07 | 0.06 | 2343.60 | 5.08 | 0.09 |
| E3 | GPM2 | 5B | AX.89598204   | 5.48E+07 | 0.06 | 2169.94 | 4.72 | 0.08 |
| E3 | GPM2 | 5B | AX.89641880   | 5.51E+07 | 0.06 | 2343.60 | 5.08 | 0.09 |
| E3 | GPM2 | 5B | AX.89426021   | 5.30E+07 | 0.06 | 2195.79 | 4.47 | 0.08 |
| E3 | GPM2 | 5B | AX.89447533   | 5.30E+07 | 0.06 | 2042.91 | 4.17 | 0.07 |
| E3 | GPM2 | 5B | X.89391178_OT | 5.30E+07 | 0.06 | 2195.79 | 4.47 | 0.08 |
| E3 | GPM2 | 5B | AX.89531803   | 5.32E+07 | 0.06 | 2278.93 | 5.02 | 0.08 |
| E3 | GPM2 | 5B | AX.89622269   | 5.32E+07 | 0.06 | 2278.93 | 5.02 | 0.08 |
| E3 | GPM2 | 5B | AX.89378332   | 5.36E+07 | 0.06 | 2128.33 | 4.70 | 0.07 |
| E3 | GPM2 | 5B | AX.89563289   | 5.37E+07 | 0.07 | 2033.35 | 4.56 | 0.07 |

|    |      |    |               |          |      |         |      |      |
|----|------|----|---------------|----------|------|---------|------|------|
| E3 | GPM2 | 5B | AX.89527561   | 5.37E+07 | 0.06 | 2278.93 | 5.02 | 0.08 |
| E3 | GPM2 | 5B | AX.89717942   | 5.37E+07 | 0.06 | 2278.93 | 5.02 | 0.08 |
| E3 | GPM2 | 5B | AX.89592692   | 5.37E+07 | 0.07 | 2017.21 | 4.32 | 0.07 |
| E3 | GPM2 | 5B | AX.89417574   | 5.37E+07 | 0.06 | 2128.33 | 4.70 | 0.07 |
| E3 | GPM2 | 5B | AX.89616455   | 3.55E+07 | 0.46 | -827.30 | 3.07 | 0.05 |
| E3 | GPM2 | 5B | AX.89326761   | 5.19E+07 | 0.05 | 2221.42 | 4.35 | 0.08 |
| E3 | GPM2 | 5B | AX.89575038   | 5.23E+07 | 0.06 | 2195.79 | 4.47 | 0.08 |
| E3 | GPM2 | 5B | AX.89325516   | 5.29E+07 | 0.05 | 2218.59 | 4.31 | 0.08 |
| E3 | GPM2 | 5B | AX.89755092   | 5.40E+07 | 0.06 | 2278.93 | 5.02 | 0.08 |
| E3 | GPM2 | 5B | AX.89487995   | 5.41E+07 | 0.06 | 2128.33 | 4.70 | 0.07 |
| E3 | GPM2 | 5B | AX.89503185   | 5.42E+07 | 0.06 | 2128.33 | 4.70 | 0.07 |
| E3 | GPM2 | 5B | AX.89717386   | 5.42E+07 | 0.06 | 2278.93 | 5.02 | 0.08 |
| E3 | GPM2 | 5B | AX.89561153   | 5.42E+07 | 0.06 | 2278.93 | 5.02 | 0.08 |
| E3 | GPM2 | 5B | AX.89733859   | 5.43E+07 | 0.05 | 1859.12 | 3.20 | 0.05 |
| E3 | GPM2 | 5B | AX.89391428   | 5.43E+07 | 0.06 | 2278.93 | 5.02 | 0.08 |
| E3 | GPM2 | 5B | AX.89561313   | 5.43E+07 | 0.06 | 2278.93 | 5.02 | 0.08 |
| E3 | GPM2 | 5B | AX.89695150   | 5.43E+07 | 0.06 | 2278.93 | 5.02 | 0.08 |
| E3 | GPM2 | 5B | AX.89310377   | 5.44E+07 | 0.06 | 2278.93 | 5.02 | 0.08 |
| E3 | GPM2 | 5B | AX.89575748   | 5.45E+07 | 0.07 | 2033.98 | 4.52 | 0.07 |
| E3 | GPM2 | 5B | AX.89382486   | 5.40E+07 | 0.07 | 2017.21 | 4.32 | 0.07 |
| E3 | GPM2 | 5B | AX.89630919   | 5.40E+07 | 0.06 | 2278.93 | 5.02 | 0.08 |
| E3 | GPM2 | 5B | AX.89618273   | 5.45E+07 | 0.07 | 2033.98 | 4.52 | 0.07 |
| E3 | GPM2 | 5B | AX.89357923   | 5.47E+07 | 0.06 | 2343.60 | 5.08 | 0.09 |
| E3 | GPM2 | 5B | AX.89388836   | 5.45E+07 | 0.06 | 2174.78 | 4.82 | 0.08 |
| E3 | GPM2 | 5B | AX.89570274   | 5.45E+07 | 0.06 | 2174.78 | 4.82 | 0.08 |
| E3 | GPS  | 5B | AX.89326761   | 5.19E+07 | 0.06 | 4.83    | 4.31 | 0.09 |
| E3 | GPS  | 5B | AX.89575038   | 5.23E+07 | 0.07 | 4.96    | 4.74 | 0.10 |
| E3 | GPS  | 5B | AX.89325516   | 5.29E+07 | 0.06 | 5.08    | 4.68 | 0.10 |
| E3 | GPS  | 5B | AX.89426021   | 5.30E+07 | 0.07 | 4.96    | 4.74 | 0.10 |
| E3 | GPS  | 5B | AX.89447533   | 5.30E+07 | 0.07 | 5.20    | 5.47 | 0.11 |
| E3 | GPS  | 5B | X.89391178_OT | 5.30E+07 | 0.07 | 4.96    | 4.74 | 0.10 |
| E3 | GPS  | 5B | AX.89531803   | 5.32E+07 | 0.07 | 4.75    | 4.63 | 0.10 |
| E3 | GPS  | 5B | AX.89622269   | 5.32E+07 | 0.07 | 4.75    | 4.63 | 0.10 |
| E3 | GPS  | 5B | AX.89378332   | 5.36E+07 | 0.08 | 4.99    | 5.34 | 0.11 |
| E3 | GPS  | 5B | AX.89563289   | 5.37E+07 | 0.08 | 4.78    | 5.21 | 0.10 |
| E3 | GPS  | 5B | AX.89527561   | 5.37E+07 | 0.07 | 4.75    | 4.63 | 0.10 |
| E3 | GPS  | 5B | AX.89717942   | 5.37E+07 | 0.07 | 4.75    | 4.63 | 0.10 |
| E3 | GPS  | 5B | AX.89592692   | 5.37E+07 | 0.08 | 4.66    | 4.83 | 0.10 |
| E3 | GPS  | 5B | AX.89417574   | 5.37E+07 | 0.08 | 4.99    | 5.34 | 0.11 |
| E3 | GPS  | 5B | AX.89382486   | 5.40E+07 | 0.08 | 4.66    | 4.83 | 0.10 |
| E3 | GPS  | 5B | AX.89630919   | 5.40E+07 | 0.07 | 4.75    | 4.63 | 0.10 |
| E3 | GPS  | 5B | AX.89755092   | 5.40E+07 | 0.07 | 4.75    | 4.63 | 0.10 |
| E3 | GPS  | 5B | AX.89487995   | 5.41E+07 | 0.08 | 4.99    | 5.34 | 0.11 |
| E3 | GPS  | 5B | AX.89503185   | 5.42E+07 | 0.08 | 4.99    | 5.34 | 0.11 |
| E3 | GPS  | 5B | AX.89717386   | 5.42E+07 | 0.07 | 4.75    | 4.63 | 0.10 |
| E3 | GPS  | 5B | AX.89561153   | 5.42E+07 | 0.07 | 4.75    | 4.63 | 0.10 |
| E3 | GPS  | 5B | AX.89733859   | 5.43E+07 | 0.06 | 4.58    | 3.94 | 0.08 |
| E3 | GPS  | 5B | AX.89391428   | 5.43E+07 | 0.07 | 4.75    | 4.63 | 0.10 |
| E3 | GPS  | 5B | AX.89561313   | 5.43E+07 | 0.07 | 4.75    | 4.63 | 0.10 |
| E3 | GPS  | 5B | AX.89695150   | 5.43E+07 | 0.07 | 4.75    | 4.63 | 0.10 |

|    |     |    |               |          |      |       |      |      |
|----|-----|----|---------------|----------|------|-------|------|------|
| E3 | GPS | 5B | AX.89310377   | 5.44E+07 | 0.07 | 4.75  | 4.63 | 0.10 |
| E3 | GPS | 5B | AX.89575748   | 5.45E+07 | 0.08 | 4.92  | 5.44 | 0.11 |
| E3 | GPS | 5B | AX.89388836   | 5.45E+07 | 0.08 | 4.70  | 4.75 | 0.10 |
| E3 | GPS | 5B | AX.89570274   | 5.45E+07 | 0.08 | 4.70  | 4.75 | 0.10 |
| E3 | GPS | 5B | AX.89618273   | 5.45E+07 | 0.08 | 4.92  | 5.44 | 0.11 |
| E3 | GPS | 5B | AX.89357923   | 5.47E+07 | 0.07 | 5.00  | 4.93 | 0.11 |
| E3 | GPS | 5B | AX.89444793   | 5.48E+07 | 0.07 | 5.00  | 4.93 | 0.11 |
| E3 | GPS | 5B | AX.89569208   | 5.48E+07 | 0.07 | 5.00  | 4.93 | 0.11 |
| E3 | GPS | 5B | AX.89498183   | 5.48E+07 | 0.07 | 5.00  | 4.93 | 0.11 |
| E3 | GPS | 5B | AX.89649075   | 5.48E+07 | 0.07 | 5.00  | 4.93 | 0.11 |
| E3 | GPS | 5B | AX.89598204   | 5.48E+07 | 0.08 | 5.20  | 5.63 | 0.12 |
| E3 | GPS | 5B | AX.89641880   | 5.51E+07 | 0.07 | 5.00  | 4.93 | 0.11 |
| E3 | GPS | 5B | X.89555424_OT | 5.30E+08 | 0.29 | 2.55  | 3.37 | 0.09 |
| E3 | GPS | 5B | AX.89380190   | 5.35E+08 | 0.39 | 2.29  | 3.61 | 0.07 |
| E3 | GPS | 5B | AX.89772266   | 5.36E+08 | 0.43 | 2.24  | 3.72 | 0.06 |
| E3 | GPS | 5B | AX.89677997   | 5.36E+08 | 0.43 | 2.24  | 3.72 | 0.06 |
| E3 | GPS | 5B | AX.89609004   | 5.36E+08 | 0.43 | 2.24  | 3.72 | 0.06 |
| E3 | GPS | 5B | AX.89701209   | 5.36E+08 | 0.43 | 2.24  | 3.72 | 0.06 |
| E3 | GPS | 5B | AX.89701460   | 5.36E+08 | 0.42 | 2.09  | 3.23 | 0.06 |
| E3 | GPS | 5B | AX.89589110   | 5.36E+08 | 0.40 | 2.07  | 3.08 | 0.05 |
| E3 | GPS | 5B | AX.89544678   | 5.38E+08 | 0.38 | 2.41  | 3.80 | 0.08 |
| E3 | GPS | 5B | AX.89474094   | 5.38E+08 | 0.49 | -2.24 | 3.74 | 0.07 |
| E3 | GPS | 5B | AX.89707107   | 5.38E+08 | 0.48 | -2.40 | 4.24 | 0.08 |
| E3 | GPS | 5B | AX.89352707   | 5.38E+08 | 0.38 | 2.41  | 3.80 | 0.08 |
| E3 | GPS | 5B | AX.89388848   | 5.39E+08 | 0.48 | -2.30 | 3.90 | 0.07 |
| E3 | GPS | 5B | AX.89680182   | 5.39E+08 | 0.38 | 2.41  | 3.80 | 0.08 |
| E3 | GPS | 5B | AX.89548191   | 5.39E+08 | 0.38 | 2.41  | 3.80 | 0.08 |
| E3 | GPS | 5B | AX.89694520   | 5.38E+08 | 0.38 | 2.41  | 3.80 | 0.08 |
| E3 | GPS | 5B | AX.89704009   | 5.38E+08 | 0.38 | 2.41  | 3.80 | 0.08 |
| E3 | GPS | 5B | AX.89537780   | 5.38E+08 | 0.38 | 2.41  | 3.80 | 0.08 |
| E3 | GPS | 5B | AX.89335617   | 5.38E+08 | 0.49 | -2.35 | 4.05 | 0.08 |
| E3 | GPS | 5B | AX.89425489   | 5.38E+08 | 0.48 | -2.40 | 4.24 | 0.08 |
| E3 | GPS | 5B | AX.89604018   | 5.38E+08 | 0.38 | 2.41  | 3.80 | 0.08 |
| E3 | GPS | 5B | AX.89772049   | 5.38E+08 | 0.48 | -2.40 | 4.24 | 0.08 |
| E3 | GPS | 5B | AX.89762142   | 5.38E+08 | 0.38 | 2.35  | 3.62 | 0.08 |
| E3 | GPS | 5B | AX.89372247   | 5.38E+08 | 0.38 | 2.35  | 3.62 | 0.08 |
| E3 | GPS | 5B | AX.89346029   | 5.39E+08 | 0.47 | -2.38 | 4.18 | 0.07 |
| E3 | GPS | 5B | AX.89651458   | 5.42E+08 | 0.26 | 2.53  | 3.39 | 0.07 |
| E3 | GPS | 5B | AX.89672458   | 5.42E+08 | 0.27 | 2.49  | 3.36 | 0.07 |
| E3 | GPS | 5B | AX.89550030   | 5.77E+08 | 0.11 | -3.68 | 4.03 | 0.03 |
| E3 | GY  | 5B | AX.89326761   | 5.19E+07 | 0.05 | 7.23  | 4.12 | 0.08 |
| E3 | GY  | 5B | AX.89575038   | 5.23E+07 | 0.06 | 6.74  | 3.82 | 0.07 |
| E3 | GY  | 5B | AX.89325516   | 5.29E+07 | 0.05 | 6.87  | 3.74 | 0.07 |
| E3 | GY  | 5B | AX.89426021   | 5.30E+07 | 0.06 | 6.74  | 3.82 | 0.07 |
| E3 | GY  | 5B | AX.89447533   | 5.30E+07 | 0.06 | 6.18  | 3.48 | 0.07 |
| E3 | GY  | 5B | X.89391178_OT | 5.30E+07 | 0.06 | 6.74  | 3.82 | 0.07 |
| E3 | GY  | 5B | AX.89531803   | 5.32E+07 | 0.06 | 6.85  | 4.14 | 0.08 |
| E3 | GY  | 5B | AX.89622269   | 5.32E+07 | 0.06 | 6.85  | 4.14 | 0.08 |
| E3 | GY  | 5B | AX.89378332   | 5.36E+07 | 0.06 | 6.31  | 3.79 | 0.07 |
| E3 | GY  | 5B | AX.89563289   | 5.37E+07 | 0.07 | 5.94  | 3.57 | 0.07 |

|    |      |    |                |          |      |        |      |      |
|----|------|----|----------------|----------|------|--------|------|------|
| E3 | GY   | 5B | AX.89527561    | 5.37E+07 | 0.06 | 6.85   | 4.14 | 0.08 |
| E3 | GY   | 5B | AX.89717942    | 5.37E+07 | 0.06 | 6.85   | 4.14 | 0.08 |
| E3 | GY   | 5B | AX.89592692    | 5.37E+07 | 0.07 | 5.97   | 3.48 | 0.07 |
| E3 | GY   | 5B | AX.89417574    | 5.37E+07 | 0.06 | 6.31   | 3.79 | 0.07 |
| E3 | GY   | 5B | AX.89382486    | 5.40E+07 | 0.07 | 5.97   | 3.48 | 0.07 |
| E3 | GY   | 5B | AX.89630919    | 5.40E+07 | 0.06 | 6.85   | 4.14 | 0.08 |
| E3 | GY   | 5B | AX.89755092    | 5.40E+07 | 0.06 | 6.85   | 4.14 | 0.08 |
| E3 | GY   | 5B | AX.89487995    | 5.41E+07 | 0.06 | 6.31   | 3.79 | 0.07 |
| E3 | GY   | 5B | AX.89503185    | 5.42E+07 | 0.06 | 6.31   | 3.79 | 0.07 |
| E3 | GY   | 5B | AX.89717386    | 5.42E+07 | 0.06 | 6.85   | 4.14 | 0.08 |
| E3 | GY   | 5B | AX.89561153    | 5.42E+07 | 0.06 | 6.85   | 4.14 | 0.08 |
| E3 | GY   | 5B | AX.89733859    | 5.43E+07 | 0.05 | 6.08   | 3.07 | 0.06 |
| E3 | GY   | 5B | AX.89391428    | 5.43E+07 | 0.06 | 6.85   | 4.14 | 0.08 |
| E3 | GY   | 5B | AX.89561313    | 5.43E+07 | 0.06 | 6.85   | 4.14 | 0.08 |
| E3 | GY   | 5B | AX.89695150    | 5.43E+07 | 0.06 | 6.85   | 4.14 | 0.08 |
| E3 | GY   | 5B | AX.89310377    | 5.44E+07 | 0.06 | 6.85   | 4.14 | 0.08 |
| E3 | GY   | 5B | AX.89575748    | 5.45E+07 | 0.07 | 6.28   | 3.91 | 0.07 |
| E3 | GY   | 5B | AX.89388836    | 5.45E+07 | 0.06 | 6.80   | 4.26 | 0.08 |
| E3 | GY   | 5B | AX.89570274    | 5.45E+07 | 0.06 | 6.80   | 4.26 | 0.08 |
| E3 | GY   | 5B | AX.89618273    | 5.45E+07 | 0.07 | 6.28   | 3.91 | 0.07 |
| E3 | GY   | 5B | AX.89357923    | 5.47E+07 | 0.06 | 7.32   | 4.49 | 0.08 |
| E3 | GY   | 5B | AX.89444793    | 5.48E+07 | 0.06 | 7.32   | 4.49 | 0.08 |
| E3 | GY   | 5B | AX.89569208    | 5.48E+07 | 0.06 | 7.32   | 4.49 | 0.08 |
| E3 | GY   | 5B | AX.89498183    | 5.48E+07 | 0.06 | 7.32   | 4.49 | 0.08 |
| E3 | GY   | 5B | AX.89649075    | 5.48E+07 | 0.06 | 7.32   | 4.49 | 0.08 |
| E3 | GY   | 5B | AX.89598204    | 5.48E+07 | 0.06 | 6.69   | 4.08 | 0.08 |
| E3 | GY   | 5B | AX.89641880    | 5.51E+07 | 0.06 | 7.32   | 4.49 | 0.08 |
| E3 | GY   | 5B | AX.89700382    | 6.66E+08 | 0.25 | 3.17   | 3.00 | 0.03 |
| E3 | SPM2 | 5B | AX.89438023    | 7.08E+07 | 0.49 | -22.13 | 3.63 | 0.06 |
| E3 | SPM2 | 5B | AX.89338978    | 5.99E+08 | 0.53 | -20.03 | 3.45 | 0.04 |
| E3 | SPM2 | 5B | AX.89447271    | 5.99E+08 | 0.43 | 18.79  | 3.02 | 0.04 |
| E3 | SPM2 | 5B | AX.89318860    | 6.00E+08 | 0.43 | 18.79  | 3.02 | 0.04 |
| E3 | SPM2 | 5B | AX.89416640    | 6.00E+08 | 0.44 | 19.28  | 3.20 | 0.05 |
| E3 | SPM2 | 5B | AX.89751387    | 6.87E+08 | 0.30 | 21.65  | 3.26 | 0.05 |
| E4 | GPS  | 5B | AX.89338284    | 5.81E+08 | 0.16 | -2.00  | 3.09 | 0.06 |
| E4 | GPS  | 5B | AX.89353768    | 5.83E+08 | 0.20 | -1.81  | 3.01 | 0.07 |
| E4 | GPS  | 5B | AX.89540649    | 5.53E+08 | 0.19 | -1.98  | 3.11 | 0.07 |
| E4 | GPS  | 5B | AX.89365125    | 5.62E+08 | 0.22 | -1.94  | 3.41 | 0.07 |
| E4 | SPM2 | 5B | AX.89616594    | 2.92E+08 | 0.06 | 44.21  | 4.46 | 0.11 |
| E4 | SPM2 | 5B | AX.89474859    | 6.81E+08 | 0.07 | 36.73  | 3.41 | 0.05 |
| E4 | TKW  | 5B | AX.89705636_OT | 6.97E+06 | 0.32 | 0.88   | 3.14 | 0.00 |
| E4 | TKW  | 5B | AX.89572203    | 4.91E+08 | 0.13 | -1.16  | 3.04 | 0.04 |
| E1 | GY   | 5D | AX.89432860    | 2.24E+08 | 0.50 | -2.63  | 3.94 | 0.06 |
| E1 | GY   | 5D | AX.89342736    | 4.39E+07 | 0.47 | 2.66   | 4.02 | 0.06 |
| E1 | GY   | 5D | AX.89668244    | 9.43E+07 | 0.48 | 2.29   | 3.11 | 0.05 |
| E1 | GY   | 5D | AX.86170182    | 2.44E+08 | 0.47 | 2.26   | 3.03 | 0.05 |
| E1 | GY   | 5D | AX.89742771    | 7.63E+07 | 0.50 | -2.52  | 3.68 | 0.06 |
| E1 | GY   | 5D | AX.89697957    | 4.39E+07 | 0.47 | 2.66   | 4.02 | 0.06 |
| E1 | GY   | 5D | AX.89658445    | 1.69E+08 | 0.48 | 2.49   | 3.59 | 0.06 |
| E1 | GY   | 5D | AX.89735566    | 9.36E+07 | 0.49 | -2.75  | 4.27 | 0.07 |

|    |    |    |             |          |      |       |      |      |
|----|----|----|-------------|----------|------|-------|------|------|
| E1 | GY | 5D | AX.89742771 | 7.63E+07 | 0.50 | -2.52 | 3.68 | 0.06 |
| E1 | GY | 5D | AX.89388421 | 9.76E+07 | 0.49 | -2.58 | 3.83 | 0.06 |
| E1 | GY | 5D | AX.89697957 | 4.39E+07 | 0.47 | 2.66  | 4.02 | 0.06 |
| E1 | GY | 5D | AX.89489167 | 2.19E+08 | 0.49 | -2.69 | 4.10 | 0.07 |
| E1 | GY | 5D | AX.89687953 | 5.01E+08 | 0.26 | 3.35  | 4.75 | 0.09 |
| E1 | GY | 5D | AX.89448878 | 2.24E+08 | 0.50 | -2.56 | 3.77 | 0.06 |
| E1 | GY | 5D | AX.89755586 | 1.13E+08 | 0.49 | -2.69 | 4.10 | 0.07 |
| E1 | GY | 5D | AX.89508999 | 2.11E+08 | 0.49 | -2.69 | 4.10 | 0.07 |
| E1 | GY | 5D | AX.89357131 | 4.38E+07 | 0.47 | 2.66  | 4.02 | 0.06 |
| E1 | GY | 5D | AX.89409385 | 1.69E+08 | 0.46 | 2.42  | 3.40 | 0.05 |
| E1 | GY | 5D | AX.89452608 | 5.04E+08 | 0.27 | 2.74  | 3.45 | 0.06 |
| E1 | GY | 5D | AX.89316308 | 2.33E+08 | 0.47 | 2.39  | 3.34 | 0.05 |
| E1 | GY | 5D | AX.89757300 | 8.04E+07 | 0.47 | -2.64 | 3.96 | 0.06 |
| E1 | GY | 5D | AX.89342736 | 4.39E+07 | 0.47 | 2.66  | 4.02 | 0.06 |
| E1 | GY | 5D | AX.89698977 | 4.38E+07 | 0.47 | 2.66  | 4.02 | 0.06 |
| E1 | GY | 5D | AX.89454691 | 4.30E+07 | 0.16 | -3.18 | 3.19 | 0.05 |
| E1 | GY | 5D | AX.89542052 | 7.53E+07 | 0.50 | -2.52 | 3.68 | 0.06 |
| E1 | GY | 5D | AX.89658214 | 1.04E+08 | 0.49 | -2.69 | 4.10 | 0.07 |
| E1 | GY | 5D | AX.89525078 | 1.21E+08 | 0.44 | 2.36  | 3.24 | 0.06 |
| E1 | GY | 5D | AX.89698977 | 4.38E+07 | 0.47 | 2.66  | 4.02 | 0.06 |
| E1 | GY | 5D | AX.89336477 | 1.85E+08 | 0.49 | -2.69 | 4.10 | 0.07 |
| E1 | GY | 5D | AX.89425952 | 2.11E+08 | 0.49 | -2.69 | 4.10 | 0.07 |
| E1 | GY | 5D | AX.89380347 | 2.05E+08 | 0.47 | 2.51  | 3.65 | 0.06 |
| E1 | GY | 5D | AX.89535294 | 1.38E+08 | 0.49 | -2.69 | 4.10 | 0.07 |
| E1 | GY | 5D | AX.89357131 | 4.38E+07 | 0.47 | 2.66  | 4.02 | 0.06 |
| E1 | GY | 5D | AX.89330743 | 1.98E+08 | 0.46 | 2.78  | 4.34 | 0.07 |
| E1 | GY | 5D | AX.89401495 | 4.39E+07 | 0.48 | 2.64  | 3.96 | 0.06 |
| E1 | GY | 5D | AX.89323983 | 2.25E+08 | 0.47 | 2.39  | 3.34 | 0.05 |
| E1 | GY | 5D | AX.89316308 | 2.33E+08 | 0.47 | 2.39  | 3.34 | 0.05 |
| E1 | GY | 5D | AX.89495600 | 9.72E+07 | 0.50 | -2.52 | 3.68 | 0.06 |
| E1 | GY | 5D | AX.89495600 | 9.72E+07 | 0.50 | -2.52 | 3.68 | 0.06 |
| E1 | GY | 5D | AX.86170182 | 2.44E+08 | 0.47 | 2.26  | 3.03 | 0.05 |
| E1 | GY | 5D | AX.89366425 | 1.75E+08 | 0.47 | 2.51  | 3.65 | 0.06 |
| E1 | GY | 5D | AX.89366425 | 1.75E+08 | 0.47 | 2.51  | 3.65 | 0.06 |
| E1 | GY | 5D | AX.89488601 | 4.38E+07 | 0.47 | 2.58  | 3.80 | 0.06 |
| E1 | GY | 5D | AX.89384589 | 2.10E+08 | 0.48 | 2.49  | 3.59 | 0.06 |
| E1 | GY | 5D | AX.89456254 | 1.29E+08 | 0.49 | -2.69 | 4.10 | 0.07 |
| E1 | GY | 5D | AX.89425952 | 2.11E+08 | 0.49 | -2.69 | 4.10 | 0.07 |
| E1 | GY | 5D | AX.89755586 | 1.13E+08 | 0.49 | -2.69 | 4.10 | 0.07 |
| E1 | GY | 5D | AX.89325957 | 4.38E+07 | 0.47 | 2.66  | 4.02 | 0.06 |
| E1 | GY | 5D | AX.89721683 | 1.13E+08 | 0.49 | -2.69 | 4.10 | 0.07 |
| E1 | GY | 5D | AX.89313623 | 4.37E+07 | 0.47 | 2.66  | 4.02 | 0.06 |
| E1 | GY | 5D | AX.89391478 | 1.84E+08 | 0.49 | -2.65 | 4.00 | 0.06 |
| E1 | GY | 5D | AX.89540252 | 8.03E+07 | 0.50 | 2.39  | 3.35 | 0.05 |
| E1 | GY | 5D | AX.89435838 | 2.12E+08 | 0.47 | 2.51  | 3.65 | 0.06 |
| E1 | GY | 5D | AX.89323827 | 1.14E+08 | 0.49 | -2.69 | 4.10 | 0.07 |
| E1 | GY | 5D | AX.89552613 | 1.16E+08 | 0.48 | -2.62 | 3.93 | 0.06 |
| E1 | GY | 5D | AX.89320147 | 4.38E+07 | 0.47 | 2.58  | 3.80 | 0.06 |
| E1 | GY | 5D | AX.89770647 | 1.80E+08 | 0.49 | -2.69 | 4.10 | 0.07 |
| E1 | GY | 5D | AX.89448878 | 2.24E+08 | 0.50 | -2.56 | 3.77 | 0.06 |



|    |    |    |             |          |      |       |      |      |
|----|----|----|-------------|----------|------|-------|------|------|
| E1 | GY | 5D | AX.89542052 | 7.53E+07 | 0.50 | -2.52 | 3.68 | 0.06 |
| E1 | GY | 5D | AX.89489167 | 2.19E+08 | 0.49 | -2.69 | 4.10 | 0.07 |
| E1 | GY | 5D | AX.89472078 | 1.15E+08 | 0.49 | -2.69 | 4.10 | 0.07 |
| E1 | GY | 5D | AX.89768531 | 2.15E+08 | 0.47 | 2.51  | 3.65 | 0.06 |
| E1 | GY | 5D | AX.89437950 | 9.29E+07 | 0.48 | -2.67 | 4.06 | 0.06 |
| E1 | GY | 5D | AX.89721683 | 1.13E+08 | 0.49 | -2.69 | 4.10 | 0.07 |
| E1 | GY | 5D | AX.89486678 | 4.41E+07 | 0.47 | 2.48  | 3.55 | 0.06 |
| E1 | GY | 5D | AX.89486678 | 4.41E+07 | 0.47 | 2.48  | 3.55 | 0.06 |
| E1 | GY | 5D | AX.89391478 | 1.84E+08 | 0.49 | -2.65 | 4.00 | 0.06 |
| E1 | GY | 5D | AX.89469909 | 2.42E+08 | 0.46 | 2.34  | 3.21 | 0.05 |
| E1 | GY | 5D | AX.89544499 | 8.67E+07 | 0.49 | -2.75 | 4.27 | 0.07 |
| E1 | GY | 5D | AX.89544499 | 8.67E+07 | 0.49 | -2.75 | 4.27 | 0.07 |
| E1 | GY | 5D | AX.89424238 | 4.39E+07 | 0.47 | 2.58  | 3.80 | 0.06 |
| E1 | GY | 5D | AX.89357500 | 4.39E+07 | 0.47 | 2.58  | 3.80 | 0.06 |
| E1 | GY | 5D | AX.89346059 | 1.84E+08 | 0.49 | -2.65 | 4.00 | 0.06 |
| E1 | GY | 5D | AX.89471124 | 2.21E+08 | 0.49 | -2.52 | 3.67 | 0.06 |
| E1 | GY | 5D | AX.89568920 | 1.15E+08 | 0.49 | -2.65 | 4.00 | 0.06 |
| E1 | GY | 5D | AX.89723970 | 2.30E+08 | 0.47 | 2.39  | 3.34 | 0.05 |
| E1 | GY | 5D | AX.89569343 | 1.02E+08 | 0.49 | -2.69 | 4.10 | 0.07 |
| E1 | GY | 5D | AX.89553654 | 7.76E+07 | 0.50 | -2.52 | 3.68 | 0.06 |
| E1 | GY | 5D | AX.89313623 | 4.37E+07 | 0.47 | 2.66  | 4.02 | 0.06 |
| E1 | GY | 5D | AX.89594372 | 8.94E+07 | 0.49 | -2.37 | 3.29 | 0.05 |
| E1 | GY | 5D | AX.89546668 | 9.79E+07 | 0.49 | -2.58 | 3.83 | 0.06 |
| E1 | GY | 5D | AX.89562719 | 7.68E+07 | 0.50 | -2.52 | 3.68 | 0.06 |
| E1 | GY | 5D | AX.89460527 | 9.83E+07 | 0.48 | 2.38  | 3.33 | 0.05 |
| E1 | GY | 5D | AX.89336477 | 1.85E+08 | 0.49 | -2.69 | 4.10 | 0.07 |
| E1 | GY | 5D | AX.89382937 | 8.82E+07 | 0.50 | -2.52 | 3.68 | 0.06 |
| E1 | GY | 5D | AX.89369146 | 8.05E+07 | 0.50 | -2.52 | 3.68 | 0.06 |
| E1 | GY | 5D | AX.89478204 | 1.04E+08 | 0.49 | -2.69 | 4.10 | 0.07 |
| E1 | GY | 5D | AX.89443733 | 1.85E+08 | 0.48 | 2.49  | 3.59 | 0.06 |
| E1 | GY | 5D | AX.89454691 | 4.30E+07 | 0.16 | -3.18 | 3.19 | 0.05 |
| E1 | GY | 5D | AX.89536739 | 7.82E+07 | 0.50 | -2.52 | 3.68 | 0.06 |
| E1 | GY | 5D | AX.89384589 | 2.10E+08 | 0.48 | 2.49  | 3.59 | 0.06 |
| E1 | GY | 5D | AX.89552613 | 1.16E+08 | 0.48 | -2.62 | 3.93 | 0.06 |
| E1 | GY | 5D | AX.89433215 | 1.19E+08 | 0.49 | -2.69 | 4.10 | 0.07 |
| E1 | GY | 5D | AX.89406002 | 1.66E+08 | 0.49 | -2.69 | 4.10 | 0.07 |
| E1 | GY | 5D | AX.89720229 | 1.09E+08 | 0.49 | -2.65 | 4.00 | 0.06 |
| E1 | GY | 5D | AX.89735566 | 9.36E+07 | 0.49 | -2.75 | 4.27 | 0.07 |
| E1 | GY | 5D | AX.89731768 | 4.37E+07 | 0.48 | 2.70  | 4.13 | 0.07 |
| E1 | GY | 5D | AX.89633037 | 8.68E+07 | 0.50 | -2.52 | 3.68 | 0.06 |
| E1 | GY | 5D | AX.89658214 | 1.04E+08 | 0.49 | -2.69 | 4.10 | 0.07 |
| E1 | GY | 5D | AX.89648256 | 2.12E+08 | 0.47 | 2.51  | 3.65 | 0.06 |
| E1 | GY | 5D | AX.89682193 | 4.39E+07 | 0.47 | 2.58  | 3.80 | 0.06 |
| E1 | GY | 5D | AX.89375308 | 4.37E+07 | 0.47 | 2.66  | 4.02 | 0.06 |
| E1 | GY | 5D | AX.89382301 | 5.20E+08 | 0.28 | -2.49 | 3.01 | 0.05 |
| E1 | GY | 5D | AX.89438522 | 4.39E+07 | 0.47 | 2.58  | 3.80 | 0.06 |
| E1 | GY | 5D | AX.89400139 | 2.17E+08 | 0.47 | 2.51  | 3.65 | 0.06 |
| E1 | GY | 5D | AX.89408003 | 2.29E+08 | 0.49 | 2.58  | 3.83 | 0.06 |
| E1 | GY | 5D | AX.89540252 | 8.03E+07 | 0.50 | 2.39  | 3.35 | 0.05 |
| E1 | GY | 5D | AX.89380347 | 2.05E+08 | 0.47 | 2.51  | 3.65 | 0.06 |

|    |    |    |             |          |      |       |      |      |
|----|----|----|-------------|----------|------|-------|------|------|
| E1 | GY | 5D | AX.89369146 | 8.05E+07 | 0.50 | -2.52 | 3.68 | 0.06 |
| E1 | GY | 5D | AX.89387650 | 4.41E+07 | 0.47 | 2.50  | 3.61 | 0.06 |
| E1 | GY | 5D | AX.89401087 | 9.25E+07 | 0.50 | -2.52 | 3.68 | 0.06 |
| E1 | GY | 5D | AX.89401495 | 4.39E+07 | 0.48 | 2.64  | 3.96 | 0.06 |
| E1 | GY | 5D | AX.89470370 | 2.44E+08 | 0.47 | 2.26  | 3.03 | 0.05 |
| E1 | GY | 5D | AX.89734213 | 4.38E+07 | 0.47 | 2.66  | 4.02 | 0.06 |
| E1 | GY | 5D | AX.89734213 | 4.38E+07 | 0.47 | 2.66  | 4.02 | 0.06 |
| E1 | GY | 5D | AX.89575695 | 1.57E+08 | 0.49 | -2.69 | 4.10 | 0.07 |
| E1 | GY | 5D | AX.89588502 | 4.38E+07 | 0.47 | 2.58  | 3.80 | 0.06 |
| E1 | GY | 5D | AX.89320147 | 4.38E+07 | 0.47 | 2.58  | 3.80 | 0.06 |
| E1 | GY | 5D | AX.89495145 | 4.41E+07 | 0.47 | 2.66  | 4.02 | 0.06 |
| E1 | GY | 5D | AX.89471124 | 2.21E+08 | 0.49 | -2.52 | 3.67 | 0.06 |
| E1 | GY | 5D | AX.89661655 | 4.38E+07 | 0.47 | 2.48  | 3.55 | 0.06 |
| E1 | GY | 5D | AX.89553654 | 7.76E+07 | 0.50 | -2.52 | 3.68 | 0.06 |
| E1 | GY | 5D | AX.89768531 | 2.15E+08 | 0.47 | 2.51  | 3.65 | 0.06 |
| E1 | GY | 5D | AX.89508999 | 2.11E+08 | 0.49 | -2.69 | 4.10 | 0.07 |
| E1 | GY | 5D | AX.89395350 | 1.68E+08 | 0.49 | -2.69 | 4.10 | 0.07 |
| E1 | GY | 5D | AX.89382937 | 8.82E+07 | 0.50 | -2.52 | 3.68 | 0.06 |
| E1 | GY | 5D | AX.89404149 | 7.38E+07 | 0.50 | -2.52 | 3.68 | 0.06 |
| E1 | GY | 5D | AX.89388421 | 9.76E+07 | 0.49 | -2.58 | 3.83 | 0.06 |
| E1 | GY | 5D | AX.89673057 | 2.05E+08 | 0.49 | -2.69 | 4.10 | 0.07 |
| E1 | GY | 5D | AX.89416752 | 1.22E+08 | 0.49 | -2.69 | 4.10 | 0.07 |
| E1 | GY | 5D | AX.89710686 | 4.39E+07 | 0.47 | 2.59  | 3.83 | 0.06 |
| E1 | GY | 5D | AX.89762986 | 1.06E+08 | 0.48 | 2.49  | 3.59 | 0.06 |
| E1 | GY | 5D | AX.89511658 | 7.41E+07 | 0.50 | -2.52 | 3.68 | 0.06 |
| E1 | GY | 5D | AX.89568887 | 9.40E+07 | 0.49 | -2.50 | 3.61 | 0.06 |
| E1 | GY | 5D | AX.89569343 | 1.02E+08 | 0.49 | -2.69 | 4.10 | 0.07 |
| E1 | GY | 5D | AX.89727907 | 9.25E+07 | 0.43 | 2.49  | 3.53 | 0.05 |
| E1 | GY | 5D | AX.89727907 | 9.25E+07 | 0.43 | 2.49  | 3.53 | 0.05 |
| E1 | GY | 5D | AX.89325677 | 5.56E+07 | 0.49 | 2.42  | 3.42 | 0.05 |
| E1 | GY | 5D | AX.89739353 | 4.41E+07 | 0.47 | 2.52  | 3.66 | 0.06 |
| E1 | GY | 5D | AX.89570601 | 1.52E+08 | 0.49 | -2.69 | 4.10 | 0.07 |
| E1 | GY | 5D | AX.89774939 | 4.38E+07 | 0.47 | 2.58  | 3.80 | 0.06 |
| E1 | GY | 5D | AX.89774939 | 4.38E+07 | 0.47 | 2.58  | 3.80 | 0.06 |
| E1 | GY | 5D | AX.89664265 | 4.38E+07 | 0.47 | 2.58  | 3.80 | 0.06 |
| E1 | GY | 5D | AX.89668244 | 9.43E+07 | 0.48 | 2.29  | 3.11 | 0.05 |
| E1 | GY | 5D | AX.89664840 | 8.82E+07 | 0.50 | -2.52 | 3.68 | 0.06 |
| E1 | GY | 5D | AX.89443965 | 1.94E+08 | 0.49 | -2.69 | 4.10 | 0.07 |
| E1 | GY | 5D | AX.89432860 | 2.24E+08 | 0.50 | -2.63 | 3.94 | 0.06 |
| E1 | GY | 5D | AX.89494925 | 4.39E+07 | 0.47 | 2.58  | 3.80 | 0.06 |
| E1 | GY | 5D | AX.89657536 | 4.38E+07 | 0.47 | 2.58  | 3.80 | 0.06 |
| E1 | GY | 5D | AX.89445109 | 5.04E+08 | 0.27 | 2.74  | 3.45 | 0.06 |
| E1 | GY | 5D | AX.89743508 | 1.11E+08 | 0.48 | -2.61 | 3.90 | 0.06 |
| E1 | GY | 5D | AX.89707797 | 4.41E+07 | 0.47 | 2.43  | 3.43 | 0.05 |
| E1 | GY | 5D | AX.89731768 | 4.37E+07 | 0.48 | 2.70  | 4.13 | 0.07 |
| E1 | GY | 5D | AX.89351168 | 2.42E+08 | 0.46 | 2.31  | 3.14 | 0.05 |
| E1 | GY | 5D | AX.89707299 | 7.55E+07 | 0.50 | -2.52 | 3.68 | 0.06 |
| E1 | GY | 5D | AX.89434036 | 1.24E+08 | 0.49 | -2.69 | 4.10 | 0.07 |
| E1 | GY | 5D | AX.89382301 | 5.20E+08 | 0.28 | -2.49 | 3.01 | 0.05 |
| E1 | GY | 5D | AX.89562719 | 7.68E+07 | 0.50 | -2.52 | 3.68 | 0.06 |

|    |    |    |             |          |      |       |      |      |
|----|----|----|-------------|----------|------|-------|------|------|
| E1 | GY | 5D | AX.89558521 | 2.02E+08 | 0.47 | 2.51  | 3.65 | 0.06 |
| E1 | GY | 5D | AX.89401087 | 9.25E+07 | 0.50 | -2.52 | 3.68 | 0.06 |
| E1 | GY | 5D | AX.89420794 | 9.82E+07 | 0.49 | -2.58 | 3.83 | 0.06 |
| E1 | GY | 5D | AX.89424238 | 4.39E+07 | 0.47 | 2.58  | 3.80 | 0.06 |
| E1 | GY | 5D | AX.89666291 | 2.33E+08 | 0.49 | -2.66 | 4.03 | 0.07 |
| E1 | GY | 5D | AX.89424526 | 7.67E+07 | 0.48 | -2.61 | 3.90 | 0.06 |
| E1 | GY | 5D | AX.89320362 | 1.03E+08 | 0.49 | -2.69 | 4.10 | 0.07 |
| E1 | GY | 5D | AX.89576275 | 2.49E+08 | 0.49 | -2.40 | 3.38 | 0.05 |
| E1 | GY | 5D | AX.89661655 | 4.38E+07 | 0.47 | 2.48  | 3.55 | 0.06 |
| E1 | GY | 5D | AX.89723970 | 2.30E+08 | 0.47 | 2.39  | 3.34 | 0.05 |
| E1 | GY | 5D | AX.89554039 | 4.37E+07 | 0.47 | 2.66  | 4.02 | 0.06 |
| E1 | GY | 5D | AX.89403223 | 1.20E+08 | 0.49 | -2.69 | 4.10 | 0.07 |
| E1 | GY | 5D | AX.89403223 | 1.20E+08 | 0.49 | -2.69 | 4.10 | 0.07 |
| E1 | GY | 5D | AX.89700339 | 1.25E+08 | 0.49 | -2.69 | 4.10 | 0.07 |
| E1 | GY | 5D | AX.89700339 | 1.25E+08 | 0.49 | -2.69 | 4.10 | 0.07 |
| E1 | GY | 5D | AX.89395350 | 1.68E+08 | 0.49 | -2.69 | 4.10 | 0.07 |
| E1 | GY | 5D | AX.89687953 | 5.01E+08 | 0.26 | 3.35  | 4.75 | 0.09 |
| E1 | GY | 5D | AX.89333326 | 2.32E+08 | 0.47 | 2.39  | 3.34 | 0.05 |
| E1 | GY | 5D | AX.89676090 | 2.00E+08 | 0.47 | 2.51  | 3.65 | 0.06 |
| E1 | GY | 5D | AX.89428535 | 1.12E+08 | 0.49 | -2.69 | 4.10 | 0.07 |
| E1 | GY | 5D | AX.89544327 | 2.16E+08 | 0.49 | -2.68 | 4.09 | 0.07 |
| E1 | GY | 5D | AX.89323983 | 2.25E+08 | 0.47 | 2.39  | 3.34 | 0.05 |
| E1 | GY | 5D | AX.89462453 | 1.94E+08 | 0.47 | 2.51  | 3.65 | 0.06 |
| E1 | GY | 5D | AX.89677346 | 2.10E+08 | 0.49 | -2.69 | 4.10 | 0.07 |
| E1 | GY | 5D | AX.89523007 | 4.37E+07 | 0.47 | 2.58  | 3.80 | 0.06 |
| E1 | GY | 5D | AX.89346059 | 1.84E+08 | 0.49 | -2.65 | 4.00 | 0.06 |
| E1 | GY | 5D | AX.89429373 | 2.31E+08 | 0.47 | 2.39  | 3.34 | 0.05 |
| E1 | GY | 5D | AX.89417529 | 2.25E+08 | 0.49 | 2.58  | 3.83 | 0.06 |
| E1 | GY | 5D | AX.89417529 | 2.25E+08 | 0.49 | 2.58  | 3.83 | 0.06 |
| E1 | GY | 5D | AX.89346238 | 2.15E+08 | 0.47 | 2.51  | 3.65 | 0.06 |
| E1 | GY | 5D | AX.89346238 | 2.15E+08 | 0.47 | 2.51  | 3.65 | 0.06 |
| E1 | GY | 5D | AX.89335224 | 4.41E+07 | 0.47 | 2.58  | 3.80 | 0.06 |
| E1 | GY | 5D | AX.89452608 | 5.04E+08 | 0.27 | 2.74  | 3.45 | 0.06 |
| E1 | GY | 5D | AX.89716222 | 1.20E+08 | 0.49 | -2.69 | 4.10 | 0.07 |
| E1 | GY | 5D | AX.89766690 | 2.29E+08 | 0.50 | -2.56 | 3.77 | 0.06 |
| E1 | GY | 5D | AX.89325677 | 5.56E+07 | 0.49 | 2.42  | 3.42 | 0.05 |
| E1 | GY | 5D | AX.89654927 | 2.00E+08 | 0.47 | 2.51  | 3.65 | 0.06 |
| E1 | GY | 5D | AX.89325957 | 4.38E+07 | 0.47 | 2.66  | 4.02 | 0.06 |
| E1 | GY | 5D | AX.89459312 | 1.30E+08 | 0.50 | -2.55 | 3.75 | 0.06 |
| E1 | GY | 5D | AX.89570601 | 1.52E+08 | 0.49 | -2.69 | 4.10 | 0.07 |
| E1 | GY | 5D | AX.89360590 | 8.89E+07 | 0.49 | -2.61 | 3.90 | 0.06 |
| E1 | GY | 5D | AX.89420287 | 4.41E+07 | 0.47 | 2.59  | 3.83 | 0.06 |
| E1 | GY | 5D | AX.89396564 | 9.74E+07 | 0.48 | -2.34 | 3.23 | 0.05 |
| E1 | GY | 5D | AX.89433215 | 1.19E+08 | 0.49 | -2.69 | 4.10 | 0.07 |
| E1 | GY | 5D | AX.89498706 | 4.41E+07 | 0.47 | 2.56  | 3.76 | 0.06 |
| E1 | GY | 5D | AX.89498706 | 4.41E+07 | 0.47 | 2.56  | 3.76 | 0.06 |
| E1 | GY | 5D | AX.89406002 | 1.66E+08 | 0.49 | -2.69 | 4.10 | 0.07 |
| E1 | GY | 5D | AX.89743508 | 1.11E+08 | 0.48 | -2.61 | 3.90 | 0.06 |
| E1 | GY | 5D | AX.89488601 | 4.38E+07 | 0.47 | 2.58  | 3.80 | 0.06 |
| E1 | GY | 5D | AX.89351168 | 2.42E+08 | 0.46 | 2.31  | 3.14 | 0.05 |

|    |     |    |             |          |      |       |      |      |
|----|-----|----|-------------|----------|------|-------|------|------|
| E1 | GY  | 5D | AX.89328741 | 4.39E+07 | 0.47 | 2.58  | 3.80 | 0.06 |
| E1 | GY  | 5D | AX.89558521 | 2.02E+08 | 0.47 | 2.51  | 3.65 | 0.06 |
| E1 | GY  | 5D | AX.89364151 | 1.18E+08 | 0.49 | -2.69 | 4.10 | 0.07 |
| E1 | GY  | 5D | AX.89364151 | 1.18E+08 | 0.49 | -2.69 | 4.10 | 0.07 |
| E1 | GY  | 5D | AX.89622218 | 9.79E+07 | 0.49 | -2.58 | 3.83 | 0.06 |
| E1 | GY  | 5D | AX.89469355 | 5.15E+08 | 0.06 | -5.39 | 3.80 | 0.06 |
| E1 | GY  | 5D | AX.89387650 | 4.41E+07 | 0.47 | 2.50  | 3.61 | 0.06 |
| E1 | GY  | 5D | AX.89352946 | 4.38E+07 | 0.47 | 2.58  | 3.80 | 0.06 |
| E1 | GY  | 5D | AX.89469909 | 2.42E+08 | 0.46 | 2.34  | 3.21 | 0.05 |
| E1 | GY  | 5D | AX.89330743 | 1.98E+08 | 0.46 | 2.78  | 4.34 | 0.07 |
| E1 | GY  | 5D | AX.89494925 | 4.39E+07 | 0.47 | 2.58  | 3.80 | 0.06 |
| E1 | GY  | 5D | AX.89710686 | 4.39E+07 | 0.47 | 2.59  | 3.83 | 0.06 |
| E1 | GY  | 5D | AX.89757300 | 8.04E+07 | 0.47 | -2.64 | 3.96 | 0.06 |
| E1 | GY  | 5D | AX.89495145 | 4.41E+07 | 0.47 | 2.66  | 4.02 | 0.06 |
| E1 | GY  | 5D | AX.89564905 | 1.71E+08 | 0.49 | -2.77 | 4.33 | 0.07 |
| E1 | GY  | 5D | AX.89424526 | 7.67E+07 | 0.48 | -2.61 | 3.90 | 0.06 |
| E1 | GY  | 5D | AX.89479940 | 4.38E+07 | 0.47 | 2.66  | 4.02 | 0.06 |
| E1 | GY  | 5D | AX.89479940 | 4.38E+07 | 0.47 | 2.66  | 4.02 | 0.06 |
| E1 | GY  | 5D | AX.89770647 | 1.80E+08 | 0.49 | -2.69 | 4.10 | 0.07 |
| E1 | GY  | 5D | AX.89711492 | 1.34E+08 | 0.49 | -2.69 | 4.10 | 0.07 |
| E1 | GY  | 5D | AX.89554039 | 4.37E+07 | 0.47 | 2.66  | 4.02 | 0.06 |
| E1 | GY  | 5D | AX.89460527 | 9.83E+07 | 0.48 | 2.38  | 3.33 | 0.05 |
| E1 | GY  | 5D | AX.89566469 | 9.25E+07 | 0.48 | -2.67 | 4.06 | 0.06 |
| E1 | GY  | 5D | AX.89566469 | 9.25E+07 | 0.48 | -2.67 | 4.06 | 0.06 |
| E1 | GY  | 5D | AX.89438522 | 4.39E+07 | 0.47 | 2.58  | 3.80 | 0.06 |
| E1 | GY  | 5D | AX.89473397 | 4.37E+07 | 0.47 | 2.66  | 4.02 | 0.06 |
| E1 | GY  | 5D | AX.89404149 | 7.38E+07 | 0.50 | -2.52 | 3.68 | 0.06 |
| E1 | GY  | 5D | AX.89725494 | 1.84E+08 | 0.49 | -2.65 | 4.00 | 0.06 |
| E1 | GY  | 5D | AX.89521924 | 8.85E+07 | 0.47 | -2.64 | 3.96 | 0.06 |
| E1 | GY  | 5D | AX.89578902 | 1.33E+08 | 0.49 | -2.72 | 4.20 | 0.07 |
| E1 | GY  | 5D | AX.89544327 | 2.16E+08 | 0.49 | -2.68 | 4.09 | 0.07 |
| E1 | GY  | 5D | AX.89568887 | 9.40E+07 | 0.49 | -2.50 | 3.61 | 0.06 |
| E1 | GY  | 5D | AX.89593351 | 1.75E+08 | 0.47 | 2.51  | 3.65 | 0.06 |
| E1 | GY  | 5D | AX.89452264 | 1.71E+08 | 0.49 | -2.69 | 4.10 | 0.07 |
| E1 | GY  | 5D | AX.89601604 | 4.41E+07 | 0.47 | 2.58  | 3.80 | 0.06 |
| E1 | GY  | 5D | AX.89601604 | 4.41E+07 | 0.47 | 2.58  | 3.80 | 0.06 |
| E1 | GY  | 5D | AX.89633037 | 8.68E+07 | 0.50 | -2.52 | 3.68 | 0.06 |
| E1 | GY  | 5D | AX.89633560 | 7.67E+07 | 0.47 | -2.64 | 3.97 | 0.06 |
| E1 | GY  | 5D | AX.89546668 | 9.79E+07 | 0.49 | -2.58 | 3.83 | 0.06 |
| E1 | GY  | 5D | AX.89767889 | 1.94E+08 | 0.48 | 2.49  | 3.59 | 0.06 |
| E1 | GY  | 5D | AX.89595297 | 1.10E+08 | 0.49 | -2.65 | 4.00 | 0.06 |
| E1 | GY  | 5D | AX.89408003 | 2.29E+08 | 0.49 | 2.58  | 3.83 | 0.06 |
| E1 | GY  | 5D | AX.89360590 | 8.89E+07 | 0.49 | -2.61 | 3.90 | 0.06 |
| E1 | GY  | 5D | AX.89443733 | 1.85E+08 | 0.48 | 2.49  | 3.59 | 0.06 |
| E1 | GPS | 5D | AX.89443998 | 1.88E+08 | 0.49 | -1.11 | 3.01 | 0.05 |
| E1 | GY  | 5D | AX.89426929 | 4.38E+07 | 0.47 | 2.66  | 4.02 | 0.06 |
| E1 | GY  | 5D | AX.89568303 | 7.60E+07 | 0.50 | -2.52 | 3.68 | 0.06 |
| E1 | GY  | 5D | AX.89568303 | 7.60E+07 | 0.50 | -2.52 | 3.68 | 0.06 |
| E1 | GY  | 5D | AX.89373750 | 1.09E+08 | 0.49 | -2.69 | 4.10 | 0.07 |
| E1 | GY  | 5D | AX.89375041 | 2.26E+08 | 0.47 | 2.39  | 3.34 | 0.05 |

|    |     |    |             |          |      |       |      |      |
|----|-----|----|-------------|----------|------|-------|------|------|
| E1 | GPS | 5D | AX.89720229 | 1.09E+08 | 0.49 | -1.11 | 3.01 | 0.05 |
| E1 | GY  | 5D | AX.89658445 | 1.69E+08 | 0.48 | 2.49  | 3.59 | 0.06 |
| E1 | GPS | 5D | AX.89424526 | 7.67E+07 | 0.48 | -1.12 | 3.10 | 0.05 |
| E1 | GY  | 5D | AX.89400139 | 2.17E+08 | 0.47 | 2.51  | 3.65 | 0.06 |
| E1 | GY  | 5D | AX.89412202 | 4.41E+07 | 0.50 | -2.25 | 3.02 | 0.05 |
| E1 | GY  | 5D | AX.89679562 | 7.44E+07 | 0.50 | -2.52 | 3.68 | 0.06 |
| E1 | GY  | 5D | AX.89679562 | 7.44E+07 | 0.50 | -2.52 | 3.68 | 0.06 |
| E1 | GY  | 5D | AX.89352946 | 4.38E+07 | 0.47 | 2.58  | 3.80 | 0.06 |
| E1 | GY  | 5D | AX.89575695 | 1.57E+08 | 0.49 | -2.69 | 4.10 | 0.07 |
| E1 | GY  | 5D | AX.89730596 | 1.08E+08 | 0.47 | 2.35  | 3.24 | 0.05 |
| E1 | GY  | 5D | AX.89666291 | 2.33E+08 | 0.49 | -2.66 | 4.03 | 0.07 |
| E1 | GY  | 5D | AX.89553085 | 2.28E+08 | 0.50 | -2.79 | 4.38 | 0.07 |
| E1 | GY  | 5D | AX.89416417 | 4.37E+07 | 0.47 | 2.58  | 3.80 | 0.06 |
| E1 | GY  | 5D | AX.89731614 | 2.05E+08 | 0.47 | 2.51  | 3.65 | 0.06 |
| E1 | GY  | 5D | AX.89724236 | 1.37E+08 | 0.49 | -2.69 | 4.10 | 0.07 |
| E1 | GY  | 5D | AX.89724236 | 1.37E+08 | 0.49 | -2.69 | 4.10 | 0.07 |
| E1 | GPS | 5D | AX.89459312 | 1.30E+08 | 0.50 | -1.13 | 3.11 | 0.05 |
| E1 | GY  | 5D | AX.89680171 | 1.17E+08 | 0.49 | -2.69 | 4.10 | 0.07 |
| E1 | GY  | 5D | AX.89680171 | 1.17E+08 | 0.49 | -2.69 | 4.10 | 0.07 |
| E1 | GY  | 5D | AX.89662378 | 1.04E+08 | 0.49 | -2.69 | 4.10 | 0.07 |
| E1 | GY  | 5D | AX.89662378 | 1.04E+08 | 0.49 | -2.69 | 4.10 | 0.07 |
| E1 | GY  | 5D | AX.89333326 | 2.32E+08 | 0.47 | 2.39  | 3.34 | 0.05 |
| E1 | GY  | 5D | AX.89676090 | 2.00E+08 | 0.47 | 2.51  | 3.65 | 0.06 |
| E1 | GPS | 5D | AX.89766690 | 2.29E+08 | 0.50 | -1.12 | 3.08 | 0.05 |
| E1 | GY  | 5D | AX.89428535 | 1.12E+08 | 0.49 | -2.69 | 4.10 | 0.07 |
| E1 | GY  | 5D | AX.89578902 | 1.33E+08 | 0.49 | -2.72 | 4.20 | 0.07 |
| E1 | GPS | 5D | AX.89544327 | 2.16E+08 | 0.49 | -1.10 | 3.00 | 0.05 |
| E1 | GY  | 5D | AX.89664840 | 8.82E+07 | 0.50 | -2.52 | 3.68 | 0.06 |
| E1 | GPS | 5D | AX.89391478 | 1.84E+08 | 0.49 | -1.11 | 3.01 | 0.05 |
| E1 | GY  | 5D | AX.89673057 | 2.05E+08 | 0.49 | -2.69 | 4.10 | 0.07 |
| E1 | GY  | 5D | AX.89526837 | 1.14E+08 | 0.49 | -2.69 | 4.10 | 0.07 |
| E1 | GY  | 5D | AX.89660434 | 4.38E+07 | 0.47 | 2.58  | 3.80 | 0.06 |
| E1 | GY  | 5D | AX.89416752 | 1.22E+08 | 0.49 | -2.69 | 4.10 | 0.07 |
| E1 | GY  | 5D | AX.89462453 | 1.94E+08 | 0.47 | 2.51  | 3.65 | 0.06 |
| E1 | GY  | 5D | AX.89357500 | 4.39E+07 | 0.47 | 2.58  | 3.80 | 0.06 |
| E1 | GY  | 5D | AX.89523007 | 4.37E+07 | 0.47 | 2.58  | 3.80 | 0.06 |
| E1 | GY  | 5D | AX.89762986 | 1.06E+08 | 0.48 | 2.49  | 3.59 | 0.06 |
| E1 | GPS | 5D | AX.89666291 | 2.33E+08 | 0.49 | -1.16 | 3.27 | 0.06 |
| E1 | GPS | 5D | AX.89409385 | 1.69E+08 | 0.46 | 1.13  | 3.10 | 0.05 |
| E1 | GY  | 5D | AX.89511658 | 7.41E+07 | 0.50 | -2.52 | 3.68 | 0.06 |
| E1 | GY  | 5D | AX.89568606 | 1.06E+08 | 0.49 | -2.69 | 4.10 | 0.07 |
| E1 | GPS | 5D | AX.89576275 | 2.49E+08 | 0.49 | -1.19 | 3.40 | 0.06 |
| E1 | GPS | 5D | AX.89725494 | 1.84E+08 | 0.49 | -1.11 | 3.01 | 0.05 |
| E1 | GY  | 5D | AX.89766690 | 2.29E+08 | 0.50 | -2.56 | 3.77 | 0.06 |
| E1 | GY  | 5D | AX.89716818 | 1.19E+08 | 0.49 | -2.69 | 4.10 | 0.07 |
| E1 | GY  | 5D | AX.89420375 | 7.44E+07 | 0.50 | -2.52 | 3.68 | 0.06 |
| E1 | GY  | 5D | AX.89420375 | 7.44E+07 | 0.50 | -2.52 | 3.68 | 0.06 |
| E1 | GY  | 5D | AX.89657536 | 4.38E+07 | 0.47 | 2.58  | 3.80 | 0.06 |
| E1 | GY  | 5D | AX.89445109 | 5.04E+08 | 0.27 | 2.74  | 3.45 | 0.06 |
| E1 | GY  | 5D | AX.89707797 | 4.41E+07 | 0.47 | 2.43  | 3.43 | 0.05 |

|    |     |    |             |          |      |       |      |      |
|----|-----|----|-------------|----------|------|-------|------|------|
| E1 | GY  | 5D | AX.89480523 | 4.41E+07 | 0.47 | 2.66  | 4.02 | 0.06 |
| E1 | GY  | 5D | AX.89480523 | 4.41E+07 | 0.47 | 2.66  | 4.02 | 0.06 |
| E1 | GY  | 5D | AX.89456254 | 1.29E+08 | 0.49 | -2.69 | 4.10 | 0.07 |
| E1 | GY  | 5D | AX.89711519 | 4.41E+07 | 0.47 | 2.58  | 3.80 | 0.06 |
| E1 | GY  | 5D | AX.89434036 | 1.24E+08 | 0.49 | -2.69 | 4.10 | 0.07 |
| E1 | GY  | 5D | AX.89412202 | 4.41E+07 | 0.50 | -2.25 | 3.02 | 0.05 |
| E1 | GY  | 5D | AX.89565036 | 1.58E+08 | 0.47 | 2.51  | 3.65 | 0.06 |
| E1 | GY  | 5D | AX.89565036 | 1.58E+08 | 0.47 | 2.51  | 3.65 | 0.06 |
| E1 | GY  | 5D | AX.89638076 | 1.31E+08 | 0.49 | -2.69 | 4.10 | 0.07 |
| E1 | GY  | 5D | AX.89420794 | 9.82E+07 | 0.49 | -2.58 | 3.83 | 0.06 |
| E1 | GY  | 5D | AX.89548887 | 1.28E+08 | 0.49 | -2.33 | 3.21 | 0.05 |
| E1 | GY  | 5D | AX.89588502 | 4.38E+07 | 0.47 | 2.58  | 3.80 | 0.06 |
| E1 | GY  | 5D | AX.89353576 | 9.16E+07 | 0.49 | -2.75 | 4.27 | 0.07 |
| E1 | GY  | 5D | AX.89320362 | 1.03E+08 | 0.49 | -2.69 | 4.10 | 0.07 |
| E1 | GY  | 5D | AX.89416417 | 4.37E+07 | 0.47 | 2.58  | 3.80 | 0.06 |
| E1 | GPS | 5D | AX.89573386 | 2.22E+08 | 0.47 | -1.18 | 3.36 | 0.06 |
| E1 | GY  | 5D | AX.89565647 | 2.19E+08 | 0.47 | 2.47  | 3.54 | 0.06 |
| E1 | GY  | 5D | AX.89772754 | 4.38E+07 | 0.47 | 2.58  | 3.80 | 0.06 |
| E1 | GY  | 5D | AX.89725494 | 1.84E+08 | 0.49 | -2.65 | 4.00 | 0.06 |
| E1 | GY  | 5D | AX.89521924 | 8.85E+07 | 0.47 | -2.64 | 3.96 | 0.06 |
| E1 | GY  | 5D | AX.89762284 | 8.25E+07 | 0.47 | -2.64 | 3.96 | 0.06 |
| E1 | GY  | 5D | AX.89660113 | 4.38E+07 | 0.47 | 2.66  | 4.02 | 0.06 |
| E1 | GY  | 5D | AX.89660113 | 4.38E+07 | 0.47 | 2.66  | 4.02 | 0.06 |
| E1 | GY  | 5D | AX.89323827 | 1.14E+08 | 0.49 | -2.69 | 4.10 | 0.07 |
| E1 | GY  | 5D | AX.89689324 | 1.84E+08 | 0.49 | -2.65 | 4.00 | 0.06 |
| E1 | GY  | 5D | AX.89677346 | 2.10E+08 | 0.49 | -2.69 | 4.10 | 0.07 |
| E1 | GY  | 5D | AX.89511566 | 1.12E+08 | 0.47 | 2.51  | 3.65 | 0.06 |
| E1 | GY  | 5D | AX.89568920 | 1.15E+08 | 0.49 | -2.65 | 4.00 | 0.06 |
| E1 | GY  | 5D | AX.89429887 | 4.38E+07 | 0.47 | 2.66  | 4.02 | 0.06 |
| E1 | GY  | 5D | AX.89429887 | 4.38E+07 | 0.47 | 2.66  | 4.02 | 0.06 |
| E1 | GY  | 5D | AX.89716222 | 1.20E+08 | 0.49 | -2.69 | 4.10 | 0.07 |
| E1 | GY  | 5D | AX.89535294 | 1.38E+08 | 0.49 | -2.69 | 4.10 | 0.07 |
| E1 | GY  | 5D | AX.89394993 | 4.39E+07 | 0.47 | 2.58  | 3.80 | 0.06 |
| E1 | GY  | 5D | AX.89394993 | 4.39E+07 | 0.47 | 2.58  | 3.80 | 0.06 |
| E1 | GY  | 5D | AX.89359879 | 1.55E+08 | 0.47 | 2.51  | 3.65 | 0.06 |
| E1 | GY  | 5D | AX.89359879 | 1.55E+08 | 0.47 | 2.51  | 3.65 | 0.06 |
| E1 | GPS | 5D | AX.89346059 | 1.84E+08 | 0.49 | -1.11 | 3.01 | 0.05 |
| E1 | GY  | 5D | AX.89536693 | 1.51E+08 | 0.49 | -2.69 | 4.10 | 0.07 |
| E1 | GY  | 5D | AX.89536693 | 1.51E+08 | 0.49 | -2.69 | 4.10 | 0.07 |
| E1 | GY  | 5D | AX.89420287 | 4.41E+07 | 0.47 | 2.59  | 3.83 | 0.06 |
| E1 | GY  | 5D | AX.89396564 | 9.74E+07 | 0.48 | -2.34 | 3.23 | 0.05 |
| E1 | GY  | 5D | AX.89681465 | 2.03E+08 | 0.47 | 2.51  | 3.63 | 0.06 |
| E1 | GY  | 5D | AX.89328741 | 4.39E+07 | 0.47 | 2.58  | 3.80 | 0.06 |
| E1 | GY  | 5D | AX.89617933 | 1.84E+08 | 0.48 | 2.45  | 3.49 | 0.05 |
| E1 | GY  | 5D | AX.89617933 | 1.84E+08 | 0.48 | 2.45  | 3.49 | 0.05 |
| E1 | GY  | 5D | AX.89755860 | 4.41E+07 | 0.47 | 2.58  | 3.80 | 0.06 |
| E1 | GY  | 5D | AX.89469355 | 5.15E+08 | 0.06 | -5.39 | 3.80 | 0.06 |
| E1 | GY  | 5D | AX.89721992 | 4.41E+07 | 0.47 | 2.58  | 3.80 | 0.06 |
| E1 | GY  | 5D | AX.89721992 | 4.41E+07 | 0.47 | 2.58  | 3.80 | 0.06 |
| E1 | GY  | 5D | AX.89435838 | 2.12E+08 | 0.47 | 2.51  | 3.65 | 0.06 |

|    |      |    |             |          |      |        |      |      |
|----|------|----|-------------|----------|------|--------|------|------|
| E1 | GY   | 5D | AX.89564905 | 1.71E+08 | 0.49 | -2.77  | 4.33 | 0.07 |
| E1 | GY   | 5D | AX.89507780 | 8.85E+07 | 0.50 | 2.47   | 3.56 | 0.06 |
| E1 | GY   | 5D | AX.89507780 | 8.85E+07 | 0.50 | 2.47   | 3.56 | 0.06 |
| E1 | GY   | 5D | AX.89711492 | 1.34E+08 | 0.49 | -2.69  | 4.10 | 0.07 |
| E1 | GY   | 5D | AX.89472078 | 1.15E+08 | 0.49 | -2.69  | 4.10 | 0.07 |
| E1 | GY   | 5D | AX.89739353 | 4.41E+07 | 0.47 | 2.52   | 3.66 | 0.06 |
| E1 | GPM2 | 5D | AX.89426929 | 4.38E+07 | 0.47 | 583.37 | 3.05 | 0.05 |
| E1 | GY   | 5D | AX.89473397 | 4.37E+07 | 0.47 | 2.66   | 4.02 | 0.06 |
| E1 | GY   | 5D | AX.89623625 | 4.41E+07 | 0.47 | 2.48   | 3.55 | 0.06 |
| E1 | GY   | 5D | AX.89623625 | 4.41E+07 | 0.47 | 2.48   | 3.55 | 0.06 |
| E1 | GY   | 5D | AX.89511566 | 1.12E+08 | 0.47 | 2.51   | 3.65 | 0.06 |
| E1 | GY   | 5D | AX.89593351 | 1.75E+08 | 0.47 | 2.51   | 3.65 | 0.06 |
| E1 | GY   | 5D | AX.89335224 | 4.41E+07 | 0.47 | 2.58   | 3.80 | 0.06 |
| E1 | GPM2 | 5D | AX.89473397 | 4.37E+07 | 0.47 | 583.37 | 3.05 | 0.05 |
| E1 | GY   | 5D | AX.89594372 | 8.94E+07 | 0.49 | -2.37  | 3.29 | 0.05 |
| E1 | GY   | 5D | AX.89633560 | 7.67E+07 | 0.47 | -2.64  | 3.97 | 0.06 |
| E1 | GY   | 5D | AX.89654927 | 2.00E+08 | 0.47 | 2.51   | 3.65 | 0.06 |
| E1 | GY   | 5D | AX.89767889 | 1.94E+08 | 0.48 | 2.49   | 3.59 | 0.06 |
| E1 | GPS  | 5D | AX.89361116 | 2.76E+08 | 0.25 | 1.30   | 3.07 | 0.05 |
| E1 | GPS  | 5D | AX.89552613 | 1.16E+08 | 0.48 | -1.13  | 3.12 | 0.05 |
| E1 | GPS  | 5D | AX.89595297 | 1.10E+08 | 0.49 | -1.11  | 3.01 | 0.05 |
| E1 | GY   | 5D | AX.89536739 | 7.82E+07 | 0.50 | -2.52  | 3.68 | 0.06 |
| E1 | GPS  | 5D | AX.89578902 | 1.33E+08 | 0.49 | -1.13  | 3.11 | 0.05 |
| E1 | GY   | 5D | AX.89373750 | 1.09E+08 | 0.49 | -2.69  | 4.10 | 0.07 |
| E1 | GPS  | 5D | AX.89701251 | 2.96E+08 | 0.25 | 1.30   | 3.10 | 0.05 |
| E1 | GY   | 5D | AX.89720229 | 1.09E+08 | 0.49 | -2.65  | 4.00 | 0.06 |
| E1 | GPM2 | 5D | AX.89660113 | 4.38E+07 | 0.47 | 583.37 | 3.05 | 0.05 |
| E1 | GY   | 5D | AX.89375041 | 2.26E+08 | 0.47 | 2.39   | 3.34 | 0.05 |
| E1 | GY   | 5D | AX.89648256 | 2.12E+08 | 0.47 | 2.51   | 3.65 | 0.06 |
| E1 | GY   | 5D | AX.89707299 | 7.55E+07 | 0.50 | -2.52  | 3.68 | 0.06 |
| E1 | GY   | 5D | AX.89682193 | 4.39E+07 | 0.47 | 2.58   | 3.80 | 0.06 |
| E1 | GPS  | 5D | AX.89553085 | 2.28E+08 | 0.50 | -1.19  | 3.42 | 0.06 |
| E1 | GY   | 5D | AX.89375308 | 4.37E+07 | 0.47 | 2.66   | 4.02 | 0.06 |
| E1 | GY   | 5D | AX.89525078 | 1.21E+08 | 0.44 | 2.36   | 3.24 | 0.06 |
| E1 | GPM2 | 5D | AX.89687953 | 5.01E+08 | 0.26 | 687.78 | 3.21 | 0.06 |
| E1 | GY   | 5D | AX.89443998 | 1.88E+08 | 0.49 | -2.65  | 4.00 | 0.06 |
| E1 | GY   | 5D | AX.89443998 | 1.88E+08 | 0.49 | -2.65  | 4.00 | 0.06 |
| E1 | GY   | 5D | AX.89470370 | 2.44E+08 | 0.47 | 2.26   | 3.03 | 0.05 |
| E1 | GY   | 5D | AX.89730596 | 1.08E+08 | 0.47 | 2.35   | 3.24 | 0.05 |
| E1 | GY   | 5D | AX.89576275 | 2.49E+08 | 0.49 | -2.40  | 3.38 | 0.05 |
| E1 | GY   | 5D | AX.89553085 | 2.28E+08 | 0.50 | -2.79  | 4.38 | 0.07 |
| E1 | GY   | 5D | AX.89731614 | 2.05E+08 | 0.47 | 2.51   | 3.65 | 0.06 |
| E1 | GPS  | 5D | AX.89568920 | 1.15E+08 | 0.49 | -1.11  | 3.01 | 0.05 |
| E1 | GPS  | 5D | AX.89640713 | 2.74E+08 | 0.25 | 1.30   | 3.07 | 0.05 |
| E1 | GPS  | 5D | AX.89471124 | 2.21E+08 | 0.49 | -1.13  | 3.11 | 0.05 |
| E1 | GPS  | 5D | AX.89689324 | 1.84E+08 | 0.49 | -1.11  | 3.01 | 0.05 |
| E1 | GY   | 5D | AX.89526837 | 1.14E+08 | 0.49 | -2.69  | 4.10 | 0.07 |
| E1 | GPM2 | 5D | AX.89554039 | 4.37E+07 | 0.47 | 583.37 | 3.05 | 0.05 |
| E1 | GY   | 5D | AX.89568606 | 1.06E+08 | 0.49 | -2.69  | 4.10 | 0.07 |
| E1 | GY   | 5D | AX.89703697 | 2.19E+08 | 0.49 | -2.69  | 4.10 | 0.07 |

|    |      |    |             |          |      |          |      |      |
|----|------|----|-------------|----------|------|----------|------|------|
| E1 | GY   | 5D | AX.89430604 | 2.30E+08 | 0.28 | -3.39    | 5.12 | 0.09 |
| E1 | GPM2 | 5D | AX.89479940 | 4.38E+07 | 0.47 | 583.37   | 3.05 | 0.05 |
| E1 | GY   | 5D | AX.89716818 | 1.19E+08 | 0.49 | -2.69    | 4.10 | 0.07 |
| E1 | GY   | 5D | AX.89459312 | 1.30E+08 | 0.50 | -2.55    | 3.75 | 0.06 |
| E1 | GPM2 | 5D | AX.89325957 | 4.38E+07 | 0.47 | 583.37   | 3.05 | 0.05 |
| E1 | GY   | 5D | AX.89664265 | 4.38E+07 | 0.47 | 2.58     | 3.80 | 0.06 |
| E1 | GPM2 | 5D | AX.89480523 | 4.41E+07 | 0.47 | 583.37   | 3.05 | 0.05 |
| E1 | GY   | 5D | AX.89426929 | 4.38E+07 | 0.47 | 2.66     | 4.02 | 0.06 |
| E1 | GY   | 5D | AX.89573386 | 2.22E+08 | 0.47 | -2.67    | 4.05 | 0.07 |
| E1 | GY   | 5D | AX.89711519 | 4.41E+07 | 0.47 | 2.58     | 3.80 | 0.06 |
| E1 | GY   | 5D | AX.89622218 | 9.79E+07 | 0.49 | -2.58    | 3.83 | 0.06 |
| E1 | GY   | 5D | AX.89638076 | 1.31E+08 | 0.49 | -2.69    | 4.10 | 0.07 |
| E1 | GY   | 5D | AX.89548887 | 1.28E+08 | 0.49 | -2.33    | 3.21 | 0.05 |
| E1 | GY   | 5D | AX.89353576 | 9.16E+07 | 0.49 | -2.75    | 4.27 | 0.07 |
| E1 | GY   | 5D | AX.89565647 | 2.19E+08 | 0.47 | 2.47     | 3.54 | 0.06 |
| E1 | GY   | 5D | AX.89772754 | 4.38E+07 | 0.47 | 2.58     | 3.80 | 0.06 |
| E1 | GY   | 5D | AX.89585184 | 4.38E+07 | 0.47 | 2.66     | 4.02 | 0.06 |
| E1 | GY   | 5D | AX.89585184 | 4.38E+07 | 0.47 | 2.66     | 4.02 | 0.06 |
| E1 | GY   | 5D | AX.89632186 | 2.17E+08 | 0.49 | 2.68     | 4.08 | 0.07 |
| E1 | GY   | 5D | AX.89762284 | 8.25E+07 | 0.47 | -2.64    | 3.96 | 0.06 |
| E1 | GY   | 5D | AX.89429373 | 2.31E+08 | 0.47 | 2.39     | 3.34 | 0.05 |
| E1 | GY   | 5D | AX.89452264 | 1.71E+08 | 0.49 | -2.69    | 4.10 | 0.07 |
| E1 | GY   | 5D | AX.89409385 | 1.69E+08 | 0.46 | 2.42     | 3.40 | 0.05 |
| E1 | GY   | 5D | AX.89681465 | 2.03E+08 | 0.47 | 2.51     | 3.63 | 0.06 |
| E1 | GPM2 | 5D | AX.89584091 | 4.53E+07 | 0.09 | -1184.31 | 3.90 | 0.06 |
| E1 | GY   | 5D | AX.89437950 | 9.29E+07 | 0.48 | -2.67    | 4.06 | 0.06 |
| E1 | GPM2 | 5D | AX.89375308 | 4.37E+07 | 0.47 | 583.37   | 3.05 | 0.05 |
| E1 | GPM2 | 5D | AX.89429887 | 4.38E+07 | 0.47 | 583.37   | 3.05 | 0.05 |
| E1 | GY   | 5D | AX.89595297 | 1.10E+08 | 0.49 | -2.65    | 4.00 | 0.06 |
| E1 | GY   | 5D | AX.89478204 | 1.04E+08 | 0.49 | -2.69    | 4.10 | 0.07 |
| E1 | GY   | 5D | AX.89443965 | 1.94E+08 | 0.49 | -2.69    | 4.10 | 0.07 |
| E1 | GPM2 | 5D | AX.89313623 | 4.37E+07 | 0.47 | 583.37   | 3.05 | 0.05 |
| E1 | GPM2 | 5D | AX.89585184 | 4.38E+07 | 0.47 | 583.37   | 3.05 | 0.05 |
| E1 | GPS  | 5D | AX.89330743 | 1.98E+08 | 0.46 | 1.21     | 3.51 | 0.06 |
| E1 | GPM2 | 5D | AX.89457727 | 4.18E+07 | 0.19 | 742.99   | 3.06 | 0.05 |
| E1 | GPM2 | 5D | AX.89342736 | 4.39E+07 | 0.47 | 583.37   | 3.05 | 0.05 |
| E1 | GPM2 | 5D | AX.89697957 | 4.39E+07 | 0.47 | 583.37   | 3.05 | 0.05 |
| E1 | GPS  | 5D | AX.89448878 | 2.24E+08 | 0.50 | -1.12    | 3.08 | 0.05 |
| E1 | GPM2 | 5D | AX.89734213 | 4.38E+07 | 0.47 | 583.37   | 3.05 | 0.05 |
| E1 | GPM2 | 5D | AX.89495145 | 4.41E+07 | 0.47 | 583.37   | 3.05 | 0.05 |
| E1 | GY   | 5D | AX.89703697 | 2.19E+08 | 0.49 | -2.69    | 4.10 | 0.07 |
| E1 | GY   | 5D | AX.89430604 | 2.30E+08 | 0.28 | -3.39    | 5.12 | 0.09 |
| E1 | GPM2 | 5D | AX.89357131 | 4.38E+07 | 0.47 | 583.37   | 3.05 | 0.05 |
| E1 | GY   | 5D | AX.89573386 | 2.22E+08 | 0.47 | -2.67    | 4.05 | 0.07 |
| E1 | GY   | 5D | AX.89755860 | 4.41E+07 | 0.47 | 2.58     | 3.80 | 0.06 |
| E1 | GY   | 5D | AX.89632186 | 2.17E+08 | 0.49 | 2.68     | 4.08 | 0.07 |
| E1 | GY   | 5D | AX.89689324 | 1.84E+08 | 0.49 | -2.65    | 4.00 | 0.06 |
| E1 | GY   | 5D | AX.89660434 | 4.38E+07 | 0.47 | 2.58     | 3.80 | 0.06 |
| E1 | GPM2 | 5D | AX.89401495 | 4.39E+07 | 0.48 | 581.36   | 3.03 | 0.05 |
| E1 | GPS  | 5D | AX.89591395 | 2.90E+08 | 0.27 | 1.31     | 3.25 | 0.06 |



|    |      |    |             |          |      |          |      |      |
|----|------|----|-------------|----------|------|----------|------|------|
| E1 | GPM2 | 5D | AX.89731768 | 4.37E+07 | 0.48 | 594.92   | 3.15 | 0.05 |
| E1 | GPM2 | 5D | AX.89698977 | 4.38E+07 | 0.47 | 583.37   | 3.05 | 0.05 |
| E2 | SPM2 | 5D | AX.89723525 | 2.79E+08 | 0.14 | -17.65   | 3.31 | 0.05 |
| E2 | GY   | 5D | AX.89720258 | 4.65E+08 | 0.06 | -5.09    | 4.34 | 0.07 |
| E2 | GY   | 5D | AX.89720258 | 4.65E+08 | 0.06 | -5.09    | 4.34 | 0.07 |
| E2 | GY   | 5D | AX.89430604 | 2.30E+08 | 0.28 | -2.19    | 3.28 | 0.05 |
| E2 | GY   | 5D | AX.89430604 | 2.30E+08 | 0.28 | -2.19    | 3.28 | 0.05 |
| E2 | GPM2 | 5D | AX.89391799 | 4.38E+08 | 0.05 | -1140.06 | 3.28 | 0.05 |
| E2 | GY   | 5D | AX.89651829 | 4.39E+08 | 0.08 | -3.43    | 3.03 | 0.05 |
| E2 | GPS  | 5D | AX.89344085 | 4.73E+08 | 0.25 | -1.84    | 4.24 | 0.06 |
| E2 | GY   | 5D | AX.89651829 | 4.39E+08 | 0.08 | -3.43    | 3.03 | 0.05 |
| E3 | GPM2 | 5D | AX.89460631 | 5.03E+07 | 0.06 | 2179.97  | 3.99 | 0.08 |
| E3 | GPM2 | 5D | AX.89498457 | 5.55E+08 | 0.24 | -987.34  | 3.04 | 0.01 |
| E3 | GPM2 | 5D | AX.89718196 | 5.56E+08 | 0.24 | -1011.87 | 3.20 | 0.02 |
| E3 | GPM2 | 5D | AX.89502286 | 5.56E+08 | 0.23 | -997.72  | 3.04 | 0.02 |
| E3 | GPM2 | 5D | AX.89688793 | 5.56E+08 | 0.24 | -989.06  | 3.01 | 0.02 |
| E3 | GPS  | 5D | AX.89460631 | 5.03E+07 | 0.07 | 4.95     | 4.47 | 0.10 |
| E3 | GY   | 5D | AX.89493367 | 5.54E+08 | 0.22 | -3.88    | 3.79 | 0.02 |
| E3 | GY   | 5D | AX.89482601 | 5.54E+08 | 0.22 | -3.80    | 3.63 | 0.02 |
| E3 | GY   | 5D | AX.89322240 | 5.54E+08 | 0.23 | -3.54    | 3.27 | 0.02 |
| E3 | GY   | 5D | AX.89525661 | 5.54E+08 | 0.22 | -3.80    | 3.63 | 0.03 |
| E3 | GY   | 5D | AX.89682906 | 5.54E+08 | 0.22 | -3.80    | 3.63 | 0.03 |
| E3 | GY   | 5D | AX.89730040 | 5.54E+08 | 0.23 | -3.88    | 3.80 | 0.03 |
| E3 | GY   | 5D | AX.89418055 | 5.54E+08 | 0.23 | -3.88    | 3.80 | 0.03 |
| E3 | GY   | 5D | AX.89591739 | 5.54E+08 | 0.23 | -3.88    | 3.80 | 0.03 |
| E3 | GY   | 5D | AX.89746626 | 5.54E+08 | 0.22 | -3.80    | 3.63 | 0.02 |
| E3 | GY   | 5D | AX.89696707 | 5.54E+08 | 0.22 | -3.80    | 3.63 | 0.02 |
| E3 | GY   | 5D | AX.89748302 | 5.54E+08 | 0.22 | -3.85    | 3.66 | 0.02 |
| E3 | GY   | 5D | AX.89725104 | 5.54E+08 | 0.24 | -3.60    | 3.45 | 0.02 |
| E3 | GY   | 5D | AX.89535199 | 5.54E+08 | 0.24 | -3.37    | 3.07 | 0.02 |
| E3 | GY   | 5D | AX.89730999 | 5.54E+08 | 0.24 | -3.37    | 3.07 | 0.02 |
| E3 | GY   | 5D | AX.89617610 | 5.54E+08 | 0.24 | -3.37    | 3.07 | 0.02 |
| E3 | GY   | 5D | AX.89487785 | 5.54E+08 | 0.24 | -3.37    | 3.07 | 0.02 |
| E3 | GY   | 5D | AX.89474409 | 5.54E+08 | 0.24 | -3.37    | 3.07 | 0.02 |
| E3 | GY   | 5D | AX.89646175 | 5.54E+08 | 0.24 | -3.37    | 3.07 | 0.02 |
| E3 | GY   | 5D | AX.89647057 | 5.54E+08 | 0.24 | -3.37    | 3.07 | 0.02 |
| E3 | GY   | 5D | AX.89450370 | 5.54E+08 | 0.24 | -3.43    | 3.16 | 0.02 |
| E3 | GY   | 5D | AX.89410073 | 5.54E+08 | 0.24 | -3.37    | 3.07 | 0.02 |
| E3 | GY   | 5D | AX.89593062 | 5.54E+08 | 0.24 | -3.37    | 3.07 | 0.02 |
| E3 | GY   | 5D | AX.89527041 | 5.54E+08 | 0.24 | -3.37    | 3.07 | 0.02 |
| E3 | GY   | 5D | AX.89676385 | 5.54E+08 | 0.24 | -3.37    | 3.07 | 0.02 |
| E3 | GY   | 5D | AX.89635270 | 5.54E+08 | 0.24 | -3.37    | 3.07 | 0.02 |
| E3 | GY   | 5D | AX.89681313 | 5.54E+08 | 0.24 | -3.37    | 3.07 | 0.02 |
| E3 | GY   | 5D | AX.89461648 | 5.54E+08 | 0.24 | -3.37    | 3.07 | 0.02 |
| E3 | GY   | 5D | AX.89634942 | 5.54E+08 | 0.24 | -3.37    | 3.07 | 0.02 |
| E3 | GY   | 5D | AX.89691448 | 5.54E+08 | 0.24 | -3.37    | 3.07 | 0.02 |
| E3 | GY   | 5D | AX.89482346 | 5.54E+08 | 0.24 | -3.37    | 3.07 | 0.02 |
| E3 | GY   | 5D | AX.89565167 | 5.54E+08 | 0.24 | -3.41    | 3.14 | 0.02 |
| E3 | GY   | 5D | AX.89588446 | 5.54E+08 | 0.25 | -3.47    | 3.24 | 0.02 |
| E3 | GY   | 5D | AX.89621290 | 5.54E+08 | 0.24 | -3.37    | 3.07 | 0.02 |

|    |    |    |             |          |      |       |      |      |
|----|----|----|-------------|----------|------|-------|------|------|
| E3 | GY | 5D | AX.89399226 | 5.54E+08 | 0.25 | -3.47 | 3.24 | 0.02 |
| E3 | GY | 5D | AX.89559427 | 5.54E+08 | 0.24 | -3.37 | 3.07 | 0.02 |
| E3 | GY | 5D | AX.89405466 | 5.55E+08 | 0.24 | -3.48 | 3.22 | 0.02 |
| E3 | GY | 5D | AX.89408713 | 5.55E+08 | 0.24 | -3.37 | 3.07 | 0.02 |
| E3 | GY | 5D | AX.89722610 | 5.55E+08 | 0.24 | -3.36 | 3.08 | 0.02 |
| E3 | GY | 5D | AX.89411160 | 5.55E+08 | 0.24 | -3.37 | 3.07 | 0.02 |
| E3 | GY | 5D | AX.89691080 | 5.55E+08 | 0.24 | -3.37 | 3.07 | 0.02 |
| E3 | GY | 5D | AX.89509353 | 5.55E+08 | 0.24 | -3.37 | 3.07 | 0.02 |
| E3 | GY | 5D | AX.89348015 | 5.55E+08 | 0.24 | -3.37 | 3.07 | 0.02 |
| E3 | GY | 5D | AX.89319576 | 5.55E+08 | 0.24 | -3.37 | 3.07 | 0.02 |
| E3 | GY | 5D | AX.89373596 | 5.55E+08 | 0.25 | -3.56 | 3.45 | 0.02 |
| E3 | GY | 5D | AX.89756067 | 5.55E+08 | 0.25 | -3.47 | 3.24 | 0.02 |
| E3 | GY | 5D | AX.89475286 | 5.55E+08 | 0.25 | -3.47 | 3.24 | 0.02 |
| E3 | GY | 5D | AX.89508645 | 5.55E+08 | 0.24 | -3.37 | 3.07 | 0.02 |
| E3 | GY | 5D | AX.89633060 | 5.55E+08 | 0.24 | -3.41 | 3.14 | 0.02 |
| E3 | GY | 5D | AX.89742233 | 5.55E+08 | 0.24 | -3.37 | 3.07 | 0.02 |
| E3 | GY | 5D | AX.89742234 | 5.55E+08 | 0.25 | -3.42 | 3.24 | 0.02 |
| E3 | GY | 5D | AX.89472995 | 5.55E+08 | 0.24 | -3.37 | 3.07 | 0.02 |
| E3 | GY | 5D | AX.89559349 | 5.55E+08 | 0.24 | -3.37 | 3.07 | 0.02 |
| E3 | GY | 5D | AX.89654896 | 5.55E+08 | 0.24 | -3.37 | 3.07 | 0.02 |
| E3 | GY | 5D | AX.89632441 | 5.55E+08 | 0.25 | -3.47 | 3.24 | 0.02 |
| E3 | GY | 5D | AX.89378913 | 5.55E+08 | 0.25 | -3.47 | 3.24 | 0.02 |
| E3 | GY | 5D | AX.89374119 | 5.55E+08 | 0.25 | -3.47 | 3.24 | 0.02 |
| E3 | GY | 5D | AX.89575542 | 5.55E+08 | 0.25 | -3.47 | 3.24 | 0.02 |
| E3 | GY | 5D | AX.89558988 | 5.55E+08 | 0.24 | -3.37 | 3.07 | 0.02 |
| E3 | GY | 5D | AX.89604182 | 5.55E+08 | 0.25 | -3.47 | 3.24 | 0.02 |
| E3 | GY | 5D | AX.89421979 | 5.55E+08 | 0.25 | -3.47 | 3.24 | 0.02 |
| E3 | GY | 5D | AX.89588180 | 5.55E+08 | 0.25 | -3.47 | 3.24 | 0.02 |
| E3 | GY | 5D | AX.89655849 | 5.55E+08 | 0.25 | -3.47 | 3.24 | 0.02 |
| E3 | GY | 5D | AX.89679387 | 5.55E+08 | 0.25 | -3.47 | 3.24 | 0.02 |
| E3 | GY | 5D | AX.89628778 | 5.55E+08 | 0.25 | -3.28 | 3.04 | 0.02 |
| E3 | GY | 5D | AX.89362998 | 5.55E+08 | 0.25 | -3.47 | 3.24 | 0.02 |
| E3 | GY | 5D | AX.89663831 | 5.55E+08 | 0.25 | -3.47 | 3.24 | 0.02 |
| E3 | GY | 5D | AX.89633160 | 5.55E+08 | 0.25 | -3.47 | 3.24 | 0.02 |
| E3 | GY | 5D | AX.89662043 | 5.55E+08 | 0.25 | -3.47 | 3.24 | 0.02 |
| E3 | GY | 5D | AX.89596434 | 5.55E+08 | 0.25 | -3.36 | 3.11 | 0.02 |
| E3 | GY | 5D | AX.89356723 | 5.55E+08 | 0.24 | -3.41 | 3.14 | 0.02 |
| E3 | GY | 5D | AX.89361706 | 5.55E+08 | 0.25 | -3.47 | 3.24 | 0.02 |
| E3 | GY | 5D | AX.89635667 | 5.55E+08 | 0.24 | -3.37 | 3.07 | 0.02 |
| E3 | GY | 5D | AX.89524955 | 5.55E+08 | 0.24 | -3.37 | 3.07 | 0.02 |
| E3 | GY | 5D | AX.89628884 | 5.55E+08 | 0.24 | -3.37 | 3.07 | 0.02 |
| E3 | GY | 5D | AX.89486985 | 5.55E+08 | 0.24 | -3.37 | 3.07 | 0.02 |
| E3 | GY | 5D | AX.89602745 | 5.55E+08 | 0.24 | -3.37 | 3.07 | 0.02 |
| E3 | GY | 5D | AX.89709349 | 5.55E+08 | 0.24 | -3.37 | 3.07 | 0.02 |
| E3 | GY | 5D | AX.89498457 | 5.55E+08 | 0.24 | -3.84 | 3.89 | 0.02 |
| E3 | GY | 5D | AX.89765961 | 5.55E+08 | 0.23 | -3.79 | 3.76 | 0.02 |
| E3 | GY | 5D | AX.89423838 | 5.55E+08 | 0.25 | -3.47 | 3.24 | 0.02 |
| E3 | GY | 5D | AX.89585586 | 5.55E+08 | 0.25 | -3.33 | 3.07 | 0.02 |
| E3 | GY | 5D | AX.89733577 | 5.55E+08 | 0.24 | -3.45 | 3.22 | 0.02 |
| E3 | GY | 5D | AX.89621662 | 5.55E+08 | 0.25 | -3.47 | 3.24 | 0.02 |

|    |     |    |             |          |      |       |      |      |
|----|-----|----|-------------|----------|------|-------|------|------|
| E3 | GY  | 5D | AX.89717918 | 5.55E+08 | 0.25 | -3.89 | 4.05 | 0.03 |
| E3 | GY  | 5D | AX.89695102 | 5.55E+08 | 0.25 | -3.42 | 3.24 | 0.02 |
| E3 | GY  | 5D | AX.89336277 | 5.55E+08 | 0.25 | -3.47 | 3.24 | 0.02 |
| E3 | GY  | 5D | AX.89512113 | 5.55E+08 | 0.24 | -3.39 | 3.13 | 0.02 |
| E3 | GY  | 5D | AX.89444140 | 5.55E+08 | 0.25 | -3.47 | 3.24 | 0.02 |
| E3 | GY  | 5D | AX.89329995 | 5.55E+08 | 0.25 | -3.47 | 3.24 | 0.02 |
| E3 | GY  | 5D | AX.89682982 | 5.55E+08 | 0.25 | -3.47 | 3.24 | 0.02 |
| E3 | GY  | 5D | AX.89616951 | 5.55E+08 | 0.25 | -3.33 | 3.07 | 0.02 |
| E3 | GY  | 5D | AX.89487156 | 5.55E+08 | 0.25 | -3.42 | 3.24 | 0.02 |
| E3 | GY  | 5D | AX.89633394 | 5.55E+08 | 0.25 | -3.33 | 3.07 | 0.02 |
| E3 | GY  | 5D | AX.89465246 | 5.55E+08 | 0.24 | -3.37 | 3.07 | 0.02 |
| E3 | GY  | 5D | AX.89686142 | 5.55E+08 | 0.24 | -3.37 | 3.07 | 0.02 |
| E3 | GY  | 5D | AX.89324532 | 5.55E+08 | 0.25 | -3.33 | 3.07 | 0.02 |
| E3 | GY  | 5D | AX.89602062 | 5.55E+08 | 0.25 | -3.33 | 3.07 | 0.02 |
| E3 | GY  | 5D | AX.89495745 | 5.55E+08 | 0.25 | -3.33 | 3.07 | 0.02 |
| E3 | GY  | 5D | AX.89331610 | 5.55E+08 | 0.25 | -3.33 | 3.07 | 0.02 |
| E3 | GY  | 5D | AX.89527135 | 5.55E+08 | 0.25 | -3.33 | 3.07 | 0.02 |
| E3 | GY  | 5D | AX.89695082 | 5.55E+08 | 0.24 | -3.40 | 3.13 | 0.02 |
| E3 | GY  | 5D | AX.89724815 | 5.55E+08 | 0.24 | -3.55 | 3.35 | 0.02 |
| E3 | GY  | 5D | AX.89465735 | 5.56E+08 | 0.24 | -3.43 | 3.23 | 0.02 |
| E3 | GY  | 5D | AX.89575504 | 5.56E+08 | 0.24 | -3.55 | 3.35 | 0.02 |
| E3 | GY  | 5D | AX.89696968 | 5.56E+08 | 0.24 | -3.65 | 3.52 | 0.02 |
| E3 | GY  | 5D | AX.89708908 | 5.56E+08 | 0.24 | -3.48 | 3.24 | 0.02 |
| E3 | GY  | 5D | AX.89447907 | 5.56E+08 | 0.25 | -3.60 | 3.51 | 0.02 |
| E3 | GY  | 5D | AX.89597197 | 5.56E+08 | 0.24 | -3.48 | 3.24 | 0.02 |
| E3 | GY  | 5D | AX.89515951 | 5.56E+08 | 0.24 | -3.55 | 3.35 | 0.02 |
| E3 | GY  | 5D | AX.89389322 | 5.56E+08 | 0.24 | -3.48 | 3.24 | 0.02 |
| E3 | GY  | 5D | AX.89410697 | 5.56E+08 | 0.24 | -3.65 | 3.52 | 0.02 |
| E3 | GY  | 5D | AX.89489669 | 5.56E+08 | 0.24 | -3.65 | 3.52 | 0.02 |
| E3 | GY  | 5D | AX.89699416 | 5.56E+08 | 0.24 | -3.43 | 3.23 | 0.02 |
| E3 | GY  | 5D | AX.89543607 | 5.56E+08 | 0.24 | -3.65 | 3.52 | 0.02 |
| E3 | GY  | 5D | AX.89424355 | 5.56E+08 | 0.24 | -3.43 | 3.23 | 0.02 |
| E3 | GY  | 5D | AX.89423099 | 5.56E+08 | 0.24 | -3.65 | 3.52 | 0.02 |
| E3 | GY  | 5D | AX.89710030 | 5.56E+08 | 0.19 | -3.84 | 3.38 | 0.03 |
| E3 | GY  | 5D | AX.89544179 | 5.56E+08 | 0.24 | -3.43 | 3.23 | 0.02 |
| E3 | GY  | 5D | AX.89505057 | 5.56E+08 | 0.24 | -3.61 | 3.55 | 0.02 |
| E3 | GY  | 5D | AX.89718196 | 5.56E+08 | 0.24 | -3.88 | 4.01 | 0.03 |
| E3 | GY  | 5D | AX.89327246 | 5.56E+08 | 0.17 | -3.82 | 3.29 | 0.03 |
| E3 | GY  | 5D | AX.89393736 | 5.56E+08 | 0.17 | -3.82 | 3.29 | 0.03 |
| E3 | GY  | 5D | AX.89610771 | 5.56E+08 | 0.17 | -4.29 | 4.01 | 0.04 |
| E3 | GY  | 5D | AX.89652316 | 5.56E+08 | 0.17 | -4.29 | 4.01 | 0.04 |
| E3 | GY  | 5D | AX.89379273 | 5.56E+08 | 0.17 | -4.29 | 4.01 | 0.04 |
| E3 | GY  | 5D | AX.89632200 | 5.56E+08 | 0.18 | -3.66 | 3.09 | 0.03 |
| E3 | GY  | 5D | AX.89684138 | 5.56E+08 | 0.19 | -3.75 | 3.38 | 0.04 |
| E3 | GY  | 5D | AX.89502286 | 5.56E+08 | 0.23 | -3.99 | 4.08 | 0.03 |
| E3 | GY  | 5D | AX.89344766 | 5.56E+08 | 0.24 | -3.41 | 3.14 | 0.02 |
| E3 | GY  | 5D | AX.89696615 | 5.56E+08 | 0.23 | -3.91 | 3.97 | 0.03 |
| E3 | GY  | 5D | AX.89688793 | 5.56E+08 | 0.24 | -4.06 | 4.23 | 0.03 |
| E3 | TKW | 5D | AX.89494435 | 3.88E+08 | 0.25 | 1.16  | 3.21 | 0.08 |
| E3 | GY  | 5D | AX.89460631 | 5.03E+07 | 0.06 | 6.58  | 3.34 | 0.07 |

|    |    |    |             |          |      |       |      |      |
|----|----|----|-------------|----------|------|-------|------|------|
| E3 | GY | 5D | AX.89648993 | 5.42E+08 | 0.36 | -3.00 | 3.01 | 0.05 |
| E3 | GY | 5D | AX.89503888 | 5.51E+08 | 0.22 | -3.37 | 3.10 | 0.05 |
| E3 | GY | 5D | AX.89398084 | 5.51E+08 | 0.22 | -3.49 | 3.25 | 0.05 |
| E3 | GY | 5D | AX.89488459 | 5.51E+08 | 0.22 | -3.49 | 3.25 | 0.05 |
| E3 | GY | 5D | AX.89674679 | 5.51E+08 | 0.21 | -3.48 | 3.18 | 0.05 |
| E3 | GY | 5D | AX.89491527 | 5.51E+08 | 0.22 | -3.43 | 3.22 | 0.05 |
| E3 | GY | 5D | AX.89531362 | 5.53E+08 | 0.23 | -3.88 | 3.80 | 0.03 |
| E3 | GY | 5D | AX.89549579 | 5.53E+08 | 0.23 | -3.88 | 3.80 | 0.03 |
| E3 | GY | 5D | AX.89596564 | 5.53E+08 | 0.23 | -3.88 | 3.80 | 0.03 |
| E3 | GY | 5D | AX.89595142 | 5.53E+08 | 0.23 | -3.88 | 3.80 | 0.03 |
| E3 | GY | 5D | AX.89433989 | 5.53E+08 | 0.21 | -3.73 | 3.42 | 0.02 |
| E3 | GY | 5D | AX.89534586 | 5.53E+08 | 0.21 | -3.84 | 3.67 | 0.02 |
| E3 | GY | 5D | AX.89527557 | 5.53E+08 | 0.21 | -3.84 | 3.67 | 0.02 |
| E3 | GY | 5D | AX.89754254 | 5.53E+08 | 0.22 | -3.92 | 3.82 | 0.03 |
| E3 | GY | 5D | AX.89370928 | 5.53E+08 | 0.22 | -3.45 | 3.03 | 0.02 |
| E3 | GY | 5D | AX.89310331 | 5.53E+08 | 0.22 | -3.71 | 3.48 | 0.02 |
| E3 | GY | 5D | AX.89716843 | 5.53E+08 | 0.22 | -3.80 | 3.63 | 0.03 |
| E3 | GY | 5D | AX.89774314 | 5.53E+08 | 0.22 | -3.80 | 3.63 | 0.03 |
| E3 | GY | 5D | AX.89506758 | 5.53E+08 | 0.22 | -3.80 | 3.63 | 0.03 |
| E3 | GY | 5D | AX.89451982 | 5.53E+08 | 0.22 | -3.80 | 3.63 | 0.03 |
| E3 | GY | 5D | AX.89721418 | 5.54E+08 | 0.18 | -3.72 | 3.13 | 0.02 |
| E3 | GY | 5D | AX.89663996 | 5.54E+08 | 0.21 | -3.71 | 3.44 | 0.03 |
| E3 | GY | 5D | AX.89755947 | 5.54E+08 | 0.22 | -3.80 | 3.63 | 0.03 |
| E3 | GY | 5D | AX.89658343 | 5.54E+08 | 0.22 | -3.80 | 3.63 | 0.03 |
| E3 | GY | 5D | AX.89341726 | 5.54E+08 | 0.22 | -3.74 | 3.52 | 0.03 |
| E3 | GY | 5D | AX.89315561 | 5.54E+08 | 0.22 | -3.80 | 3.63 | 0.03 |
| E3 | GY | 5D | AX.89642259 | 5.54E+08 | 0.22 | -3.74 | 3.52 | 0.03 |
| E3 | GY | 5D | AX.89317384 | 5.54E+08 | 0.22 | -3.74 | 3.52 | 0.03 |
| E3 | GY | 5D | AX.89644074 | 5.54E+08 | 0.21 | -3.77 | 3.56 | 0.03 |
| E3 | GY | 5D | AX.89379598 | 5.54E+08 | 0.23 | -3.88 | 3.80 | 0.03 |
| E3 | GY | 5D | AX.89496107 | 5.54E+08 | 0.23 | -3.88 | 3.80 | 0.03 |
| E3 | GY | 5D | AX.89568359 | 5.54E+08 | 0.21 | -3.78 | 3.57 | 0.02 |
| E3 | GY | 5D | AX.89632265 | 5.54E+08 | 0.22 | -3.79 | 3.64 | 0.03 |
| E3 | GY | 5D | AX.89311973 | 5.54E+08 | 0.23 | -3.53 | 3.29 | 0.02 |
| E3 | GY | 5D | AX.89658664 | 5.54E+08 | 0.21 | -3.78 | 3.57 | 0.02 |
| E3 | GY | 5D | AX.89677074 | 5.54E+08 | 0.23 | -3.88 | 3.80 | 0.03 |
| E3 | GY | 5D | AX.89345377 | 5.54E+08 | 0.23 | -3.88 | 3.80 | 0.03 |
| E3 | GY | 5D | AX.89453386 | 5.54E+08 | 0.23 | -3.88 | 3.80 | 0.03 |
| E3 | GY | 5D | AX.89577888 | 5.54E+08 | 0.21 | -3.78 | 3.57 | 0.02 |
| E3 | GY | 5D | AX.89767142 | 5.54E+08 | 0.23 | -3.88 | 3.80 | 0.03 |
| E3 | GY | 5D | AX.89667245 | 5.54E+08 | 0.22 | -3.71 | 3.48 | 0.02 |
| E3 | GY | 5D | AX.89555202 | 5.54E+08 | 0.22 | -3.71 | 3.48 | 0.02 |
| E3 | GY | 5D | AX.89369615 | 5.54E+08 | 0.23 | -3.88 | 3.80 | 0.03 |
| E3 | GY | 5D | AX.89759518 | 5.54E+08 | 0.23 | -3.88 | 3.80 | 0.03 |
| E3 | GY | 5D | AX.89588258 | 5.54E+08 | 0.22 | -3.86 | 3.74 | 0.03 |
| E3 | GY | 5D | AX.89754049 | 5.54E+08 | 0.23 | -3.88 | 3.80 | 0.03 |
| E3 | GY | 5D | AX.89619784 | 5.54E+08 | 0.22 | -3.80 | 3.63 | 0.02 |
| E3 | GY | 5D | AX.89639008 | 5.54E+08 | 0.21 | -3.63 | 3.26 | 0.02 |
| E3 | GY | 5D | AX.89441040 | 5.54E+08 | 0.22 | -3.80 | 3.63 | 0.03 |
| E3 | GY | 5D | AX.89578188 | 5.54E+08 | 0.22 | -3.84 | 3.69 | 0.03 |

|    |      |    |             |          |      |         |      |      |
|----|------|----|-------------|----------|------|---------|------|------|
| E3 | GY   | 5D | AX.89665780 | 5.54E+08 | 0.22 | -3.80   | 3.63 | 0.03 |
| E3 | GY   | 5D | AX.89571916 | 5.54E+08 | 0.22 | -3.62   | 3.31 | 0.03 |
| E3 | GY   | 5D | AX.89509820 | 5.54E+08 | 0.23 | -3.88   | 3.80 | 0.03 |
| E3 | GY   | 5D | AX.89677610 | 5.54E+08 | 0.22 | -3.80   | 3.63 | 0.03 |
| E3 | GY   | 5D | AX.89746134 | 5.54E+08 | 0.22 | -3.80   | 3.63 | 0.03 |
| E3 | GY   | 5D | AX.89454409 | 5.54E+08 | 0.21 | -3.84   | 3.73 | 0.03 |
| E3 | GY   | 5D | AX.89720445 | 5.54E+08 | 0.22 | -3.80   | 3.63 | 0.03 |
| E3 | GY   | 5D | AX.89772832 | 5.54E+08 | 0.22 | -3.80   | 3.63 | 0.03 |
| E3 | GY   | 5D | AX.89341879 | 5.54E+08 | 0.22 | -3.80   | 3.63 | 0.03 |
| E3 | GY   | 5D | AX.89552617 | 5.54E+08 | 0.22 | -3.80   | 3.63 | 0.03 |
| E3 | GY   | 5D | AX.89720944 | 5.54E+08 | 0.22 | -3.52   | 3.18 | 0.02 |
| E3 | GY   | 5D | AX.89491813 | 5.54E+08 | 0.23 | -3.88   | 3.80 | 0.03 |
| E3 | GY   | 5D | AX.89686143 | 5.54E+08 | 0.22 | -3.80   | 3.63 | 0.03 |
| E3 | GY   | 5D | AX.89441663 | 5.54E+08 | 0.22 | -3.80   | 3.63 | 0.03 |
| E3 | GY   | 5D | AX.89336024 | 5.54E+08 | 0.23 | -3.88   | 3.80 | 0.03 |
| E3 | GY   | 5D | AX.89342095 | 5.54E+08 | 0.23 | -3.75   | 3.62 | 0.02 |
| E3 | GY   | 5D | AX.89370597 | 5.54E+08 | 0.23 | -3.66   | 3.46 | 0.02 |
| E3 | GY   | 5D | AX.89627494 | 5.54E+08 | 0.22 | -3.80   | 3.63 | 0.03 |
| E3 | GY   | 5D | AX.89370230 | 5.54E+08 | 0.23 | -3.66   | 3.46 | 0.02 |
| E3 | GY   | 5D | AX.89493083 | 5.54E+08 | 0.23 | -3.75   | 3.62 | 0.02 |
| E3 | GY   | 5D | AX.89336525 | 5.54E+08 | 0.23 | -3.66   | 3.46 | 0.02 |
| E3 | GY   | 5D | AX.89386339 | 5.54E+08 | 0.23 | -3.66   | 3.46 | 0.02 |
| E3 | GY   | 5D | AX.89736893 | 5.54E+08 | 0.23 | -3.66   | 3.46 | 0.02 |
| E3 | GY   | 5D | AX.89719901 | 5.54E+08 | 0.23 | -3.66   | 3.46 | 0.02 |
| E3 | GY   | 5D | AX.89448742 | 5.54E+08 | 0.23 | -3.66   | 3.46 | 0.02 |
| E3 | GY   | 5D | AX.89341837 | 5.54E+08 | 0.23 | -3.33   | 3.00 | 0.02 |
| E3 | GY   | 5D | AX.89604858 | 5.54E+08 | 0.23 | -3.33   | 3.00 | 0.02 |
| E3 | GY   | 5D | AX.89637165 | 5.54E+08 | 0.23 | -3.33   | 3.00 | 0.02 |
| E3 | GY   | 5D | AX.89441387 | 5.54E+08 | 0.23 | -3.33   | 3.00 | 0.02 |
| E3 | GY   | 5D | AX.89670745 | 5.54E+08 | 0.23 | -3.33   | 3.00 | 0.02 |
| E3 | GY   | 5D | AX.89411065 | 5.54E+08 | 0.24 | -3.60   | 3.45 | 0.02 |
| E3 | GY   | 5D | AX.89498805 | 5.54E+08 | 0.24 | -3.60   | 3.45 | 0.02 |
| E3 | GY   | 5D | AX.89370004 | 5.55E+08 | 0.25 | -3.42   | 3.24 | 0.02 |
| E3 | GY   | 5D | AX.89512336 | 5.55E+08 | 0.25 | -3.42   | 3.24 | 0.02 |
| E3 | GY   | 5D | AX.89669450 | 5.55E+08 | 0.24 | -3.37   | 3.07 | 0.02 |
| E3 | GY   | 5D | AX.89383924 | 5.55E+08 | 0.24 | -3.52   | 3.35 | 0.02 |
| E3 | GY   | 5D | AX.89768392 | 5.55E+08 | 0.24 | -3.39   | 3.10 | 0.02 |
| E3 | GY   | 5D | AX.89383120 | 5.55E+08 | 0.25 | -3.47   | 3.24 | 0.02 |
| E3 | GY   | 5D | AX.89617428 | 5.55E+08 | 0.25 | -3.47   | 3.24 | 0.02 |
| E3 | GY   | 5D | AX.89699498 | 5.55E+08 | 0.24 | -3.37   | 3.07 | 0.02 |
| E3 | GY   | 5D | AX.89654440 | 5.55E+08 | 0.24 | -3.37   | 3.07 | 0.02 |
| E3 | GY   | 5D | AX.89563389 | 5.55E+08 | 0.24 | -3.37   | 3.07 | 0.02 |
| E4 | GPM2 | 5D | AX.89595049 | 4.74E+08 | 0.08 | -890.98 | 3.38 | 0.05 |
| E4 | SPM2 | 5D | AX.89388589 | 3.68E+08 | 0.30 | 19.64   | 3.43 | 0.03 |
| E4 | SPM2 | 5D | AX.89512625 | 4.83E+08 | 0.50 | 16.13   | 3.07 | 0.07 |
| E1 | GY   | 6A | AX.89448704 | 1.21E+07 | 0.13 | -4.16   | 4.42 | 0.08 |
| E1 | SPM2 | 6A | AX.89551676 | 3.78E+08 | 0.07 | 30.94   | 3.03 | 0.05 |
| E1 | GY   | 6A | AX.89327931 | 5.95E+08 | 0.13 | 3.75    | 3.79 | 0.07 |
| E1 | GY   | 6A | AX.89453452 | 5.95E+08 | 0.13 | 3.75    | 3.79 | 0.07 |
| E1 | GY   | 6A | AX.89399281 | 5.95E+08 | 0.13 | 3.75    | 3.79 | 0.07 |

|    |      |    |             |          |      |        |      |      |
|----|------|----|-------------|----------|------|--------|------|------|
| E1 | GY   | 6A | AX.89428100 | 5.95E+08 | 0.13 | 3.75   | 3.79 | 0.07 |
| E1 | GY   | 6A | AX.89327931 | 5.95E+08 | 0.13 | 3.75   | 3.79 | 0.07 |
| E1 | GY   | 6A | AX.89389958 | 5.60E+06 | 0.40 | -2.91  | 4.54 | 0.08 |
| E1 | GY   | 6A | AX.89425314 | 7.15E+06 | 0.31 | -2.91  | 4.14 | 0.06 |
| E1 | GY   | 6A | AX.89442899 | 6.60E+06 | 0.37 | -2.79  | 4.13 | 0.07 |
| E1 | GY   | 6A | AX.89448704 | 1.21E+07 | 0.13 | -4.16  | 4.42 | 0.08 |
| E1 | GY   | 6A | AX.89428100 | 5.95E+08 | 0.13 | 3.75   | 3.79 | 0.07 |
| E1 | SPM2 | 6A | AX.89712773 | 1.39E+07 | 0.10 | -28.56 | 3.27 | 0.06 |
| E1 | GY   | 6A | AX.89442899 | 6.60E+06 | 0.37 | -2.79  | 4.13 | 0.07 |
| E1 | GY   | 6A | AX.89437935 | 1.05E+07 | 0.11 | -3.97  | 3.62 | 0.07 |
| E1 | GY   | 6A | AX.89448872 | 6.61E+06 | 0.37 | -2.79  | 4.13 | 0.07 |
| E1 | GY   | 6A | AX.89661668 | 5.36E+06 | 0.38 | -2.71  | 3.98 | 0.07 |
| E1 | GY   | 6A | AX.89399281 | 5.95E+08 | 0.13 | 3.75   | 3.79 | 0.07 |
| E1 | GY   | 6A | AX.89489584 | 1.05E+07 | 0.11 | -3.97  | 3.62 | 0.07 |
| E1 | GY   | 6A | AX.89340229 | 5.95E+08 | 0.13 | 3.75   | 3.79 | 0.07 |
| E1 | GY   | 6A | AX.89437935 | 1.05E+07 | 0.11 | -3.97  | 3.62 | 0.07 |
| E1 | GY   | 6A | AX.89489584 | 1.05E+07 | 0.11 | -3.97  | 3.62 | 0.07 |
| E1 | GY   | 6A | AX.89453452 | 5.95E+08 | 0.13 | 3.75   | 3.79 | 0.07 |
| E1 | GY   | 6A | AX.89389958 | 5.60E+06 | 0.40 | -2.91  | 4.54 | 0.08 |
| E1 | GY   | 6A | AX.89525311 | 1.06E+07 | 0.10 | -4.22  | 3.77 | 0.07 |
| E1 | GY   | 6A | AX.89525311 | 1.06E+07 | 0.10 | -4.22  | 3.77 | 0.07 |
| E1 | GY   | 6A | AX.89310997 | 5.95E+08 | 0.13 | 3.75   | 3.79 | 0.07 |
| E1 | GY   | 6A | AX.89324890 | 5.95E+08 | 0.13 | 3.75   | 3.79 | 0.07 |
| E1 | GY   | 6A | AX.89615289 | 1.23E+07 | 0.13 | -4.16  | 4.42 | 0.08 |
| E1 | GY   | 6A | AX.89685917 | 1.05E+07 | 0.12 | -3.72  | 3.34 | 0.06 |
| E1 | GY   | 6A | AX.89605663 | 5.95E+08 | 0.13 | 3.75   | 3.79 | 0.07 |
| E1 | GY   | 6A | AX.89727310 | 1.05E+07 | 0.12 | -3.72  | 3.34 | 0.06 |
| E1 | GY   | 6A | AX.89743985 | 1.06E+07 | 0.12 | -3.72  | 3.34 | 0.06 |
| E1 | GY   | 6A | AX.89539329 | 1.05E+07 | 0.11 | -3.97  | 3.62 | 0.07 |
| E1 | GY   | 6A | AX.89368427 | 5.95E+08 | 0.13 | 3.75   | 3.79 | 0.07 |
| E1 | GY   | 6A | AX.89310997 | 5.95E+08 | 0.13 | 3.75   | 3.79 | 0.07 |
| E1 | GY   | 6A | AX.89360412 | 1.05E+07 | 0.12 | -3.72  | 3.34 | 0.06 |
| E1 | GY   | 6A | AX.89393684 | 4.58E+06 | 0.37 | -2.66  | 3.80 | 0.06 |
| E1 | GY   | 6A | AX.89341697 | 1.13E+07 | 0.06 | -4.76  | 3.08 | 0.05 |
| E1 | GY   | 6A | AX.89388224 | 5.94E+08 | 0.44 | -2.26  | 3.02 | 0.05 |
| E1 | GY   | 6A | AX.89362270 | 5.95E+08 | 0.13 | 3.75   | 3.79 | 0.07 |
| E1 | GY   | 6A | AX.89661668 | 5.36E+06 | 0.38 | -2.71  | 3.98 | 0.07 |
| E1 | GY   | 6A | AX.89378676 | 1.05E+07 | 0.12 | -3.72  | 3.34 | 0.06 |
| E1 | GY   | 6A | AX.89602780 | 5.33E+06 | 0.40 | -2.85  | 4.38 | 0.07 |
| E1 | GY   | 6A | AX.89602780 | 5.33E+06 | 0.40 | -2.85  | 4.38 | 0.07 |
| E1 | GY   | 6A | AX.89448872 | 6.61E+06 | 0.37 | -2.79  | 4.13 | 0.07 |
| E1 | GY   | 6A | AX.89391096 | 6.73E+06 | 0.37 | -2.79  | 4.13 | 0.07 |
| E1 | GY   | 6A | AX.89391096 | 6.73E+06 | 0.37 | -2.79  | 4.13 | 0.07 |
| E1 | GY   | 6A | AX.89482931 | 1.16E+07 | 0.12 | -3.81  | 3.59 | 0.07 |
| E1 | GY   | 6A | AX.89329955 | 6.32E+06 | 0.37 | -2.79  | 4.13 | 0.07 |
| E1 | GY   | 6A | AX.89716829 | 5.32E+06 | 0.38 | -2.71  | 3.98 | 0.07 |
| E1 | GY   | 6A | AX.89615589 | 5.95E+08 | 0.13 | 3.75   | 3.79 | 0.07 |
| E1 | GY   | 6A | AX.89404830 | 4.39E+06 | 0.37 | -2.66  | 3.80 | 0.06 |
| E1 | GY   | 6A | AX.89533920 | 1.23E+07 | 0.15 | -3.40  | 3.43 | 0.06 |
| E1 | GY   | 6A | AX.89533920 | 1.23E+07 | 0.15 | -3.40  | 3.43 | 0.06 |

|    |    |    |             |          |      |       |      |      |
|----|----|----|-------------|----------|------|-------|------|------|
| E1 | GY | 6A | AX.89640320 | 6.81E+06 | 0.38 | -2.43 | 3.28 | 0.05 |
| E1 | GY | 6A | AX.89324890 | 5.95E+08 | 0.13 | 3.75  | 3.79 | 0.07 |
| E1 | GY | 6A | AX.89573183 | 6.60E+06 | 0.37 | -2.79 | 4.13 | 0.07 |
| E1 | GY | 6A | AX.89371581 | 6.61E+06 | 0.37 | -2.79 | 4.13 | 0.07 |
| E1 | GY | 6A | AX.89371581 | 6.61E+06 | 0.37 | -2.79 | 4.13 | 0.07 |
| E1 | GY | 6A | AX.89482931 | 1.16E+07 | 0.12 | -3.81 | 3.59 | 0.07 |
| E1 | GY | 6A | AX.89717492 | 7.39E+06 | 0.23 | -2.99 | 3.69 | 0.06 |
| E1 | GY | 6A | AX.89353043 | 5.96E+08 | 0.16 | 3.20  | 3.22 | 0.06 |
| E1 | GY | 6A | AX.89361303 | 1.16E+07 | 0.12 | -3.91 | 3.64 | 0.07 |
| E1 | GY | 6A | AX.89714400 | 1.10E+07 | 0.12 | -3.72 | 3.34 | 0.06 |
| E1 | GY | 6A | AX.89480424 | 5.95E+08 | 0.13 | 3.75  | 3.79 | 0.07 |
| E1 | GY | 6A | AX.89480424 | 5.95E+08 | 0.13 | 3.75  | 3.79 | 0.07 |
| E1 | GY | 6A | AX.89378676 | 1.05E+07 | 0.12 | -3.72 | 3.34 | 0.06 |
| E1 | GY | 6A | AX.89682658 | 5.95E+08 | 0.13 | 3.75  | 3.79 | 0.07 |
| E1 | GY | 6A | AX.89682658 | 5.95E+08 | 0.13 | 3.75  | 3.79 | 0.07 |
| E1 | GY | 6A | AX.89539329 | 1.05E+07 | 0.11 | -3.97 | 3.62 | 0.07 |
| E1 | GY | 6A | AX.89340229 | 5.95E+08 | 0.13 | 3.75  | 3.79 | 0.07 |
| E1 | GY | 6A | AX.89412160 | 5.36E+06 | 0.38 | -2.71 | 3.98 | 0.07 |
| E1 | GY | 6A | AX.89423567 | 5.95E+08 | 0.13 | 3.75  | 3.79 | 0.07 |
| E1 | GY | 6A | AX.86165943 | 6.39E+06 | 0.37 | -2.74 | 4.01 | 0.07 |
| E1 | GY | 6A | AX.89341697 | 1.13E+07 | 0.06 | -4.76 | 3.08 | 0.05 |
| E1 | GY | 6A | AX.89676835 | 6.03E+08 | 0.43 | -2.44 | 3.41 | 0.06 |
| E1 | GY | 6A | AX.89342638 | 6.03E+08 | 0.42 | -2.38 | 3.26 | 0.05 |
| E1 | GY | 6A | AX.89342638 | 6.03E+08 | 0.42 | -2.38 | 3.26 | 0.05 |
| E1 | GY | 6A | AX.89342656 | 6.61E+06 | 0.37 | -2.79 | 4.13 | 0.07 |
| E1 | GY | 6A | AX.89342656 | 6.61E+06 | 0.37 | -2.79 | 4.13 | 0.07 |
| E1 | GY | 6A | AX.89448954 | 5.36E+06 | 0.38 | -2.71 | 3.98 | 0.07 |
| E1 | GY | 6A | AX.89448954 | 5.36E+06 | 0.38 | -2.71 | 3.98 | 0.07 |
| E1 | GY | 6A | AX.89378771 | 5.95E+08 | 0.13 | 3.75  | 3.79 | 0.07 |
| E1 | GY | 6A | AX.89625041 | 1.23E+07 | 0.14 | -3.23 | 3.07 | 0.05 |
| E1 | GY | 6A | AX.89554396 | 1.13E+07 | 0.06 | -4.76 | 3.08 | 0.05 |
| E1 | GY | 6A | AX.89379391 | 5.95E+08 | 0.13 | 3.75  | 3.79 | 0.07 |
| E1 | GY | 6A | AX.89591547 | 5.95E+08 | 0.13 | 3.65  | 3.51 | 0.06 |
| E1 | GY | 6A | AX.89591547 | 5.95E+08 | 0.13 | 3.65  | 3.51 | 0.06 |
| E1 | GY | 6A | AX.89416311 | 5.95E+08 | 0.13 | 3.75  | 3.79 | 0.07 |
| E1 | GY | 6A | AX.89714400 | 1.10E+07 | 0.12 | -3.72 | 3.34 | 0.06 |
| E1 | GY | 6A | AX.89640320 | 6.81E+06 | 0.38 | -2.43 | 3.28 | 0.05 |
| E1 | GY | 6A | AX.89648942 | 1.14E+07 | 0.10 | -3.75 | 3.08 | 0.06 |
| E1 | GY | 6A | AX.89738289 | 5.95E+08 | 0.13 | 3.75  | 3.79 | 0.07 |
| E1 | GY | 6A | AX.89418722 | 1.24E+07 | 0.13 | -3.48 | 3.24 | 0.06 |
| E1 | GY | 6A | AX.89418722 | 1.24E+07 | 0.13 | -3.48 | 3.24 | 0.06 |
| E1 | GY | 6A | AX.89716829 | 5.32E+06 | 0.38 | -2.71 | 3.98 | 0.07 |
| E1 | GY | 6A | AX.89615289 | 1.23E+07 | 0.13 | -4.16 | 4.42 | 0.08 |
| E1 | GY | 6A | AX.89362270 | 5.95E+08 | 0.13 | 3.75  | 3.79 | 0.07 |
| E1 | GY | 6A | AX.89716589 | 5.13E+06 | 0.40 | 2.30  | 3.03 | 0.04 |
| E1 | GY | 6A | AX.89499648 | 1.16E+07 | 0.12 | -3.91 | 3.64 | 0.07 |
| E1 | GY | 6A | AX.89499648 | 1.16E+07 | 0.12 | -3.91 | 3.64 | 0.07 |
| E1 | GY | 6A | AX.89573181 | 1.05E+07 | 0.11 | -3.97 | 3.62 | 0.07 |
| E1 | GY | 6A | AX.89743985 | 1.06E+07 | 0.12 | -3.72 | 3.34 | 0.06 |
| E1 | GY | 6A | AX.89720313 | 1.05E+07 | 0.11 | -3.76 | 3.30 | 0.06 |

|    |    |    |             |          |      |       |      |      |
|----|----|----|-------------|----------|------|-------|------|------|
| E1 | GY | 6A | AX.89720313 | 1.05E+07 | 0.11 | -3.76 | 3.30 | 0.06 |
| E1 | GY | 6A | AX.89363729 | 1.21E+07 | 0.11 | -3.97 | 3.63 | 0.07 |
| E1 | GY | 6A | AX.89607340 | 5.95E+08 | 0.13 | 3.75  | 3.79 | 0.07 |
| E1 | GY | 6A | AX.89353043 | 5.96E+08 | 0.16 | 3.20  | 3.22 | 0.06 |
| E1 | GY | 6A | AX.89518811 | 5.95E+08 | 0.13 | 3.75  | 3.79 | 0.07 |
| E1 | GY | 6A | AX.89681003 | 6.03E+08 | 0.43 | -2.41 | 3.35 | 0.06 |
| E1 | GY | 6A | AX.89685917 | 1.05E+07 | 0.12 | -3.72 | 3.34 | 0.06 |
| E1 | GY | 6A | AX.89549498 | 6.03E+08 | 0.43 | -2.41 | 3.35 | 0.06 |
| E1 | GY | 6A | AX.89589426 | 5.95E+08 | 0.13 | 3.75  | 3.79 | 0.07 |
| E1 | GY | 6A | AX.89589426 | 5.95E+08 | 0.13 | 3.75  | 3.79 | 0.07 |
| E1 | GY | 6A | AX.89425314 | 7.15E+06 | 0.31 | -2.91 | 4.14 | 0.06 |
| E1 | GY | 6A | AX.89625041 | 1.23E+07 | 0.14 | -3.23 | 3.07 | 0.05 |
| E1 | GY | 6A | AX.89379391 | 5.95E+08 | 0.13 | 3.75  | 3.79 | 0.07 |
| E1 | GY | 6A | AX.89662817 | 5.95E+08 | 0.13 | 3.65  | 3.51 | 0.06 |
| E1 | GY | 6A | AX.89603372 | 7.15E+06 | 0.30 | -2.66 | 3.48 | 0.05 |
| E1 | GY | 6A | AX.89451585 | 1.24E+07 | 0.13 | -3.48 | 3.24 | 0.06 |
| E1 | GY | 6A | AX.89498345 | 5.36E+06 | 0.39 | -2.74 | 4.07 | 0.07 |
| E1 | GY | 6A | AX.89498345 | 5.36E+06 | 0.39 | -2.74 | 4.07 | 0.07 |
| E1 | GY | 6A | AX.89605663 | 5.95E+08 | 0.13 | 3.75  | 3.79 | 0.07 |
| E1 | GY | 6A | AX.89727310 | 1.05E+07 | 0.12 | -3.72 | 3.34 | 0.06 |
| E1 | GY | 6A | AX.89463872 | 6.37E+06 | 0.41 | -2.66 | 3.92 | 0.06 |
| E1 | GY | 6A | AX.89717192 | 5.95E+08 | 0.13 | 3.75  | 3.79 | 0.07 |
| E1 | GY | 6A | AX.89360412 | 1.05E+07 | 0.12 | -3.72 | 3.34 | 0.06 |
| E1 | GY | 6A | AX.89466068 | 5.95E+08 | 0.13 | 3.75  | 3.79 | 0.07 |
| E1 | GY | 6A | AX.89537846 | 5.95E+08 | 0.13 | 3.75  | 3.79 | 0.07 |
| E1 | GY | 6A | AX.89537846 | 5.95E+08 | 0.13 | 3.75  | 3.79 | 0.07 |
| E1 | GY | 6A | AX.89393684 | 4.58E+06 | 0.37 | -2.66 | 3.80 | 0.06 |
| E1 | GY | 6A | AX.89503668 | 1.05E+07 | 0.12 | -3.72 | 3.34 | 0.06 |
| E1 | GY | 6A | AX.89503668 | 1.05E+07 | 0.12 | -3.72 | 3.34 | 0.06 |
| E1 | GY | 6A | AX.89573181 | 1.05E+07 | 0.11 | -3.97 | 3.62 | 0.07 |
| E1 | GY | 6A | AX.89363729 | 1.21E+07 | 0.11 | -3.97 | 3.63 | 0.07 |
| E1 | GY | 6A | AX.89400057 | 1.09E+07 | 0.11 | -3.97 | 3.62 | 0.07 |
| E1 | GY | 6A | AX.89400057 | 1.09E+07 | 0.11 | -3.97 | 3.62 | 0.07 |
| E1 | GY | 6A | AX.89329955 | 6.32E+06 | 0.37 | -2.79 | 4.13 | 0.07 |
| E1 | GY | 6A | AX.86165943 | 6.39E+06 | 0.37 | -2.74 | 4.01 | 0.07 |
| E1 | GY | 6A | AX.89353239 | 5.95E+08 | 0.13 | 3.75  | 3.79 | 0.07 |
| E1 | GY | 6A | AX.89353239 | 5.95E+08 | 0.13 | 3.75  | 3.79 | 0.07 |
| E1 | GY | 6A | AX.89576276 | 5.43E+06 | 0.38 | -2.71 | 3.98 | 0.07 |
| E1 | GY | 6A | AX.89403262 | 1.21E+07 | 0.11 | -4.37 | 4.15 | 0.08 |
| E1 | GY | 6A | AX.89403262 | 1.21E+07 | 0.11 | -4.37 | 4.15 | 0.08 |
| E1 | GY | 6A | AX.89664596 | 5.36E+06 | 0.38 | -2.71 | 3.98 | 0.07 |
| E1 | GY | 6A | AX.89664596 | 5.36E+06 | 0.38 | -2.71 | 3.98 | 0.07 |
| E1 | GY | 6A | AX.89404830 | 4.39E+06 | 0.37 | -2.66 | 3.80 | 0.06 |
| E1 | GY | 6A | AX.89369831 | 5.55E+06 | 0.38 | -2.58 | 3.64 | 0.06 |
| E1 | GY | 6A | AX.89369831 | 5.55E+06 | 0.38 | -2.58 | 3.64 | 0.06 |
| E1 | GY | 6A | AX.89608826 | 1.05E+07 | 0.11 | -4.04 | 3.62 | 0.07 |
| E1 | GY | 6A | AX.89345775 | 6.03E+08 | 0.44 | -2.39 | 3.31 | 0.05 |
| E1 | GY | 6A | AX.89707653 | 1.21E+07 | 0.13 | -3.62 | 3.38 | 0.06 |
| E1 | GY | 6A | AX.89451821 | 5.95E+08 | 0.13 | 3.75  | 3.79 | 0.07 |
| E1 | GY | 6A | AX.89684726 | 5.36E+06 | 0.38 | -2.70 | 3.92 | 0.07 |



|    |    |    |             |          |      |       |      |      |
|----|----|----|-------------|----------|------|-------|------|------|
| E1 | GY | 6A | AX.89684726 | 5.36E+06 | 0.38 | -2.70 | 3.92 | 0.07 |
| E1 | GY | 6A | AX.89608083 | 5.95E+08 | 0.13 | 3.75  | 3.79 | 0.07 |
| E1 | GY | 6A | AX.89717492 | 7.39E+06 | 0.23 | -2.99 | 3.69 | 0.06 |
| E1 | GY | 6A | AX.89619173 | 1.16E+07 | 0.12 | -3.91 | 3.64 | 0.07 |
| E1 | GY | 6A | AX.89619173 | 1.16E+07 | 0.12 | -3.91 | 3.64 | 0.07 |
| E1 | GY | 6A | AX.89361303 | 1.16E+07 | 0.12 | -3.91 | 3.64 | 0.07 |
| E1 | GY | 6A | AX.89472795 | 6.03E+08 | 0.43 | -2.41 | 3.35 | 0.06 |
| E1 | GY | 6A | AX.89412160 | 5.36E+06 | 0.38 | -2.71 | 3.98 | 0.07 |
| E1 | GY | 6A | AX.89685133 | 5.95E+08 | 0.13 | 3.75  | 3.79 | 0.07 |
| E1 | GY | 6A | AX.89541713 | 6.72E+06 | 0.37 | -2.79 | 4.13 | 0.07 |
| E1 | GY | 6A | AX.89541713 | 6.72E+06 | 0.37 | -2.79 | 4.13 | 0.07 |
| E1 | GY | 6A | AX.89549498 | 6.03E+08 | 0.43 | -2.41 | 3.35 | 0.06 |
| E1 | GY | 6A | AX.89607551 | 1.13E+07 | 0.06 | -4.76 | 3.08 | 0.05 |
| E1 | GY | 6A | AX.89521495 | 1.16E+07 | 0.12 | -3.91 | 3.64 | 0.07 |
| E1 | GY | 6A | AX.89412851 | 1.13E+07 | 0.06 | -4.76 | 3.08 | 0.05 |
| E1 | GY | 6A | AX.89615589 | 5.95E+08 | 0.13 | 3.75  | 3.79 | 0.07 |
| E1 | GY | 6A | AX.89416311 | 5.95E+08 | 0.13 | 3.75  | 3.79 | 0.07 |
| E1 | GY | 6A | AX.89345775 | 6.03E+08 | 0.44 | -2.39 | 3.31 | 0.05 |
| E1 | GY | 6A | AX.89707653 | 1.21E+07 | 0.13 | -3.62 | 3.38 | 0.06 |
| E1 | GY | 6A | AX.89445666 | 5.12E+06 | 0.40 | -2.70 | 4.00 | 0.07 |
| E1 | GY | 6A | AX.89723063 | 5.33E+06 | 0.38 | -2.71 | 3.98 | 0.07 |
| E1 | GY | 6A | AX.89646713 | 6.03E+08 | 0.44 | -2.34 | 3.19 | 0.05 |
| E1 | GY | 6A | AX.89740833 | 6.84E+06 | 0.41 | -2.96 | 4.73 | 0.08 |
| E1 | GY | 6A | AX.89608083 | 5.95E+08 | 0.13 | 3.75  | 3.79 | 0.07 |
| E1 | GY | 6A | AX.89668076 | 1.16E+07 | 0.12 | -3.91 | 3.64 | 0.07 |
| E1 | GY | 6A | AX.89633871 | 1.21E+07 | 0.14 | -3.51 | 3.45 | 0.06 |
| E1 | GY | 6A | AX.89633871 | 1.21E+07 | 0.14 | -3.51 | 3.45 | 0.06 |
| E1 | GY | 6A | AX.89687785 | 1.23E+07 | 0.13 | -4.16 | 4.42 | 0.08 |
| E1 | GY | 6A | AX.89628477 | 1.05E+07 | 0.12 | -3.72 | 3.34 | 0.06 |
| E1 | GY | 6A | AX.89716589 | 5.13E+06 | 0.40 | 2.30  | 3.03 | 0.04 |
| E1 | GY | 6A | AX.89590228 | 1.05E+07 | 0.11 | -3.97 | 3.62 | 0.07 |
| E1 | GY | 6A | AX.89590228 | 1.05E+07 | 0.11 | -3.97 | 3.62 | 0.07 |
| E1 | GY | 6A | AX.89607340 | 5.95E+08 | 0.13 | 3.75  | 3.79 | 0.07 |
| E1 | GY | 6A | AX.89710974 | 5.95E+08 | 0.13 | 3.65  | 3.51 | 0.06 |
| E1 | GY | 6A | AX.89710974 | 5.95E+08 | 0.13 | 3.65  | 3.51 | 0.06 |
| E1 | GY | 6A | AX.89353279 | 6.57E+06 | 0.37 | -2.79 | 4.13 | 0.07 |
| E1 | GY | 6A | AX.89353279 | 6.57E+06 | 0.37 | -2.79 | 4.13 | 0.07 |
| E1 | GY | 6A | AX.89388224 | 5.94E+08 | 0.44 | -2.26 | 3.02 | 0.05 |
| E1 | GY | 6A | AX.89663215 | 6.60E+06 | 0.37 | -2.79 | 4.13 | 0.07 |
| E1 | GY | 6A | AX.89685133 | 5.95E+08 | 0.13 | 3.75  | 3.79 | 0.07 |
| E1 | GY | 6A | AX.89624935 | 1.21E+07 | 0.13 | -4.16 | 4.42 | 0.08 |
| E1 | GY | 6A | AX.89624935 | 1.21E+07 | 0.13 | -4.16 | 4.42 | 0.08 |
| E1 | GY | 6A | AX.89603372 | 7.15E+06 | 0.30 | -2.66 | 3.48 | 0.05 |
| E1 | GY | 6A | AX.89521495 | 1.16E+07 | 0.12 | -3.91 | 3.64 | 0.07 |
| E1 | GY | 6A | AX.89451585 | 1.24E+07 | 0.13 | -3.48 | 3.24 | 0.06 |
| E1 | GY | 6A | AX.89573183 | 6.60E+06 | 0.37 | -2.79 | 4.13 | 0.07 |
| E1 | GY | 6A | AX.89463872 | 6.37E+06 | 0.41 | -2.66 | 3.92 | 0.06 |
| E1 | GY | 6A | AX.89717192 | 5.95E+08 | 0.13 | 3.75  | 3.79 | 0.07 |
| E1 | GY | 6A | AX.89466068 | 5.95E+08 | 0.13 | 3.75  | 3.79 | 0.07 |
| E1 | GY | 6A | AX.89417045 | 5.95E+08 | 0.13 | 3.65  | 3.51 | 0.06 |

|    |      |    |             |          |      |          |      |      |
|----|------|----|-------------|----------|------|----------|------|------|
| E1 | GPM2 | 6A | AX.89573181 | 1.05E+07 | 0.11 | -1046.42 | 3.81 | 0.07 |
| E1 | GPM2 | 6A | AX.89724488 | 6.73E+06 | 0.22 | -738.22  | 3.38 | 0.06 |
| E1 | GY   | 6A | AX.89576276 | 5.43E+06 | 0.38 | -2.71    | 3.98 | 0.07 |
| E1 | GY   | 6A | AX.89554396 | 1.13E+07 | 0.06 | -4.76    | 3.08 | 0.05 |
| E1 | GPM2 | 6A | AX.86164577 | 5.85E+08 | 0.06 | 1249.09  | 3.01 | 0.03 |
| E1 | GPM2 | 6A | AX.89720313 | 1.05E+07 | 0.11 | -958.61  | 3.28 | 0.06 |
| E1 | GY   | 6A | AX.89368427 | 5.95E+08 | 0.13 | 3.75     | 3.79 | 0.07 |
| E1 | GPM2 | 6A | AX.89472795 | 6.03E+08 | 0.43 | -587.37  | 3.08 | 0.05 |
| E1 | GY   | 6A | AX.89635128 | 6.03E+08 | 0.45 | -2.25    | 3.00 | 0.05 |
| E1 | GPM2 | 6A | AX.89549498 | 6.03E+08 | 0.43 | -587.37  | 3.08 | 0.05 |
| E1 | GPM2 | 6A | AX.89503668 | 1.05E+07 | 0.12 | -980.58  | 3.52 | 0.06 |
| E1 | GY   | 6A | AX.89748354 | 1.05E+07 | 0.12 | -3.72    | 3.34 | 0.06 |
| E1 | GY   | 6A | AX.89748354 | 1.05E+07 | 0.12 | -3.72    | 3.34 | 0.06 |
| E1 | GPM2 | 6A | AX.89484543 | 1.16E+07 | 0.11 | -989.97  | 3.47 | 0.06 |
| E1 | GY   | 6A | AX.89676835 | 6.03E+08 | 0.43 | -2.44    | 3.41 | 0.06 |
| E1 | GPM2 | 6A | AX.89533920 | 1.23E+07 | 0.15 | -867.76  | 3.41 | 0.06 |
| E1 | GPM2 | 6A | AX.89658761 | 6.73E+06 | 0.22 | -738.22  | 3.38 | 0.06 |
| E1 | GY   | 6A | AX.89648942 | 1.14E+07 | 0.10 | -3.75    | 3.08 | 0.06 |
| E1 | GPM2 | 6A | AX.89676835 | 6.03E+08 | 0.43 | -585.11  | 3.05 | 0.05 |
| E1 | GY   | 6A | AX.89690923 | 1.14E+07 | 0.12 | -3.91    | 3.64 | 0.07 |
| E1 | GY   | 6A | AX.89690923 | 1.14E+07 | 0.12 | -3.91    | 3.64 | 0.07 |
| E1 | GPM2 | 6A | AX.89608826 | 1.05E+07 | 0.11 | -1057.99 | 3.76 | 0.07 |
| E1 | GPM2 | 6A | AX.89514811 | 4.68E+08 | 0.05 | -1328.91 | 3.11 | 0.05 |
| E1 | GPM2 | 6A | AX.89375285 | 5.85E+08 | 0.06 | 1249.09  | 3.01 | 0.03 |
| E1 | GPM2 | 6A | AX.89707653 | 1.21E+07 | 0.13 | -963.16  | 3.61 | 0.06 |
| E1 | GPM2 | 6A | AX.89361303 | 1.16E+07 | 0.12 | -1067.75 | 4.07 | 0.07 |
| E1 | GY   | 6A | AX.89472795 | 6.03E+08 | 0.43 | -2.41    | 3.35 | 0.06 |
| E1 | GPM2 | 6A | AX.89619173 | 1.16E+07 | 0.12 | -1067.75 | 4.07 | 0.07 |
| E1 | GPM2 | 6A | AX.89463872 | 6.37E+06 | 0.41 | -593.97  | 3.10 | 0.05 |
| E1 | GPM2 | 6A | AX.89727310 | 1.05E+07 | 0.12 | -980.58  | 3.52 | 0.06 |
| E1 | GY   | 6A | AX.89518811 | 5.95E+08 | 0.13 | 3.75     | 3.79 | 0.07 |
| E1 | GPM2 | 6A | AX.89521495 | 1.16E+07 | 0.12 | -1067.75 | 4.07 | 0.07 |
| E1 | GPM2 | 6A | AX.89568607 | 6.03E+08 | 0.28 | 705.84   | 3.56 | 0.06 |
| E1 | GPM2 | 6A | AX.86165943 | 6.39E+06 | 0.37 | -621.36  | 3.25 | 0.05 |
| E1 | GPM2 | 6A | AX.89353279 | 6.57E+06 | 0.37 | -626.11  | 3.28 | 0.05 |
| E1 | GY   | 6A | AX.89607551 | 1.13E+07 | 0.06 | -4.76    | 3.08 | 0.05 |
| E1 | GY   | 6A | AX.89378771 | 5.95E+08 | 0.13 | 3.75     | 3.79 | 0.07 |
| E1 | GPM2 | 6A | AX.89541713 | 6.72E+06 | 0.37 | -626.11  | 3.28 | 0.05 |
| E1 | GPM2 | 6A | AX.89740833 | 6.84E+06 | 0.41 | -651.81  | 3.63 | 0.06 |
| E1 | GY   | 6A | AX.89662817 | 5.95E+08 | 0.13 | 3.65     | 3.51 | 0.06 |
| E1 | GPM2 | 6A | AX.89371581 | 6.61E+06 | 0.37 | -626.11  | 3.28 | 0.05 |
| E1 | GPM2 | 6A | AX.89442899 | 6.60E+06 | 0.37 | -626.11  | 3.28 | 0.05 |
| E1 | GY   | 6A | AX.89412851 | 1.13E+07 | 0.06 | -4.76    | 3.08 | 0.05 |
| E1 | GPM2 | 6A | AX.89321054 | 1.16E+07 | 0.11 | -989.97  | 3.47 | 0.06 |
| E1 | GY   | 6A | AX.89564541 | 5.95E+08 | 0.13 | 3.75     | 3.79 | 0.07 |
| E1 | GPM2 | 6A | AX.89476085 | 6.03E+08 | 0.27 | 704.27   | 3.45 | 0.06 |
| E1 | GY   | 6A | AX.89451821 | 5.95E+08 | 0.13 | 3.75     | 3.79 | 0.07 |
| E1 | GY   | 6A | AX.89445666 | 5.12E+06 | 0.40 | -2.70    | 4.00 | 0.07 |
| E1 | GY   | 6A | AX.89738289 | 5.95E+08 | 0.13 | 3.75     | 3.79 | 0.07 |
| E1 | GPM2 | 6A | AX.89563727 | 5.85E+08 | 0.06 | 1249.09  | 3.01 | 0.03 |

|    |      |    |             |          |      |          |      |      |
|----|------|----|-------------|----------|------|----------|------|------|
| E1 | GY   | 6A | AX.89723063 | 5.33E+06 | 0.38 | -2.71    | 3.98 | 0.07 |
| E1 | GPM2 | 6A | AX.89403262 | 1.21E+07 | 0.11 | -1065.97 | 3.81 | 0.07 |
| E1 | GY   | 6A | AX.89646713 | 6.03E+08 | 0.44 | -2.34    | 3.19 | 0.05 |
| E1 | GPM2 | 6A | AX.89663215 | 6.60E+06 | 0.37 | -626.11  | 3.28 | 0.05 |
| E1 | GY   | 6A | AX.89740833 | 6.84E+06 | 0.41 | -2.96    | 4.73 | 0.08 |
| E1 | GY   | 6A | AX.89668076 | 1.16E+07 | 0.12 | -3.91    | 3.64 | 0.07 |
| E1 | GPM2 | 6A | AX.89491145 | 6.73E+06 | 0.22 | -738.22  | 3.38 | 0.06 |
| E1 | GY   | 6A | AX.89687785 | 1.23E+07 | 0.13 | -4.16    | 4.42 | 0.08 |
| E1 | GPM2 | 6A | AX.89624935 | 1.21E+07 | 0.13 | -1078.27 | 4.51 | 0.08 |
| E1 | GPM2 | 6A | AX.89690923 | 1.14E+07 | 0.12 | -1067.75 | 4.07 | 0.07 |
| E1 | GY   | 6A | AX.89417045 | 5.95E+08 | 0.13 | 3.65     | 3.51 | 0.06 |
| E1 | GY   | 6A | AX.89534738 | 5.95E+08 | 0.13 | 3.75     | 3.79 | 0.07 |
| E1 | GPM2 | 6A | AX.89448704 | 1.21E+07 | 0.13 | -1078.27 | 4.51 | 0.08 |
| E1 | GPM2 | 6A | AX.89329900 | 6.73E+06 | 0.22 | -738.22  | 3.38 | 0.06 |
| E1 | GPM2 | 6A | AX.89539329 | 1.05E+07 | 0.11 | -1046.42 | 3.81 | 0.07 |
| E1 | GY   | 6A | AX.89564135 | 5.95E+08 | 0.13 | 3.75     | 3.79 | 0.07 |
| E1 | GY   | 6A | AX.89663215 | 6.60E+06 | 0.37 | -2.79    | 4.13 | 0.07 |
| E1 | GY   | 6A | AX.89681003 | 6.03E+08 | 0.43 | -2.41    | 3.35 | 0.06 |
| E1 | GY   | 6A | AX.89665621 | 5.87E+06 | 0.38 | -2.70    | 3.92 | 0.07 |
| E1 | GY   | 6A | AX.89515569 | 5.56E+06 | 0.38 | -2.70    | 3.92 | 0.07 |
| E1 | GPM2 | 6A | AX.89648942 | 1.14E+07 | 0.10 | -1015.67 | 3.39 | 0.06 |
| E1 | GPM2 | 6A | AX.89482931 | 1.16E+07 | 0.12 | -1027.42 | 3.92 | 0.07 |
| E1 | GY   | 6A | AX.89394835 | 5.13E+06 | 0.38 | -2.71    | 3.98 | 0.07 |
| E1 | GY   | 6A | AX.89394835 | 5.13E+06 | 0.38 | -2.71    | 3.98 | 0.07 |
| E1 | GY   | 6A | AX.89607041 | 1.05E+07 | 0.07 | -4.35    | 3.11 | 0.06 |
| E1 | GY   | 6A | AX.89607041 | 1.05E+07 | 0.07 | -4.35    | 3.11 | 0.06 |
| E1 | GPM2 | 6A | AX.89332896 | 5.85E+08 | 0.06 | 1249.09  | 3.01 | 0.03 |
| E1 | GPM2 | 6A | AX.89743985 | 1.06E+07 | 0.12 | -980.58  | 3.52 | 0.06 |
| E1 | GPM2 | 6A | AX.89687785 | 1.23E+07 | 0.13 | -1078.27 | 4.51 | 0.08 |
| E1 | GPM2 | 6A | AX.89677272 | 4.51E+08 | 0.10 | 1023.59  | 3.32 | 0.06 |
| E1 | GPM2 | 6A | AX.89714400 | 1.10E+07 | 0.12 | -980.58  | 3.52 | 0.06 |
| E1 | GPM2 | 6A | AX.89681003 | 6.03E+08 | 0.43 | -587.37  | 3.08 | 0.05 |
| E1 | GPM2 | 6A | AX.89525311 | 1.06E+07 | 0.10 | -1076.62 | 3.75 | 0.07 |
| E1 | GPM2 | 6A | AX.89541930 | 6.03E+08 | 0.31 | 660.99   | 3.36 | 0.06 |
| E1 | GY   | 6A | AX.89635128 | 6.03E+08 | 0.45 | -2.25    | 3.00 | 0.05 |
| E1 | GPM2 | 6A | AX.89378676 | 1.05E+07 | 0.12 | -980.58  | 3.52 | 0.06 |
| E1 | GPM2 | 6A | AX.89363729 | 1.21E+07 | 0.11 | -1010.21 | 3.59 | 0.06 |
| E1 | GPM2 | 6A | AX.89499648 | 1.16E+07 | 0.12 | -1067.75 | 4.07 | 0.07 |
| E1 | GY   | 6A | AX.89608826 | 1.05E+07 | 0.11 | -4.04    | 3.62 | 0.07 |
| E1 | GPM2 | 6A | AX.89329955 | 6.32E+06 | 0.37 | -626.11  | 3.28 | 0.05 |
| E1 | GPM2 | 6A | AX.89772670 | 2.88E+08 | 0.12 | 894.89   | 3.01 | 0.05 |
| E1 | GPM2 | 6A | AX.89342656 | 6.61E+06 | 0.37 | -626.11  | 3.28 | 0.05 |
| E1 | GPM2 | 6A | AX.89434668 | 4.80E+08 | 0.05 | -1328.91 | 3.11 | 0.05 |
| E1 | GPM2 | 6A | AX.89748354 | 1.05E+07 | 0.12 | -980.58  | 3.52 | 0.06 |
| E1 | GPM2 | 6A | AX.89391096 | 6.73E+06 | 0.37 | -626.11  | 3.28 | 0.05 |
| E1 | GPM2 | 6A | AX.89360412 | 1.05E+07 | 0.12 | -980.58  | 3.52 | 0.06 |
| E1 | GPM2 | 6A | AX.89417186 | 8.70E+06 | 0.09 | -1059.28 | 3.39 | 0.06 |
| E1 | GPM2 | 6A | AX.89628477 | 1.05E+07 | 0.12 | -980.58  | 3.52 | 0.06 |
| E1 | GPM2 | 6A | AX.89356250 | 4.68E+08 | 0.05 | -1328.91 | 3.11 | 0.05 |
| E1 | GY   | 6A | AX.89423567 | 5.95E+08 | 0.13 | 3.75     | 3.79 | 0.07 |

|    |      |    |             |          |      |          |      |      |
|----|------|----|-------------|----------|------|----------|------|------|
| E1 | GPM2 | 6A | AX.89633871 | 1.21E+07 | 0.14 | -927.50  | 3.65 | 0.06 |
| E1 | GPM2 | 6A | AX.86164580 | 5.85E+08 | 0.06 | 1249.09  | 3.01 | 0.03 |
| E1 | GPM2 | 6A | AX.89671643 | 6.03E+08 | 0.27 | 704.27   | 3.45 | 0.06 |
| E1 | GPM2 | 6A | AX.89327067 | 6.73E+06 | 0.22 | -738.22  | 3.38 | 0.06 |
| E1 | GPM2 | 6A | AX.89448872 | 6.61E+06 | 0.37 | -626.11  | 3.28 | 0.05 |
| E1 | GY   | 6A | AX.89564541 | 5.95E+08 | 0.13 | 3.75     | 3.79 | 0.07 |
| E1 | GPM2 | 6A | AX.89590228 | 1.05E+07 | 0.11 | -1046.42 | 3.81 | 0.07 |
| E1 | GPM2 | 6A | AX.89668076 | 1.16E+07 | 0.12 | -1067.75 | 4.07 | 0.07 |
| E1 | GPM2 | 6A | AX.89573183 | 6.60E+06 | 0.37 | -626.11  | 3.28 | 0.05 |
| E1 | GY   | 6A | AX.89628477 | 1.05E+07 | 0.12 | -3.72    | 3.34 | 0.06 |
| E1 | GPM2 | 6A | AX.89717492 | 7.39E+06 | 0.23 | -763.83  | 3.68 | 0.06 |
| E1 | TKW  | 6A | AX.89450530 | 5.85E+08 | 0.07 | -1.64    | 3.05 | 0.05 |
| E1 | GY   | 6A | AX.89534738 | 5.95E+08 | 0.13 | 3.75     | 3.79 | 0.07 |
| E1 | GPM2 | 6A | AX.89685917 | 1.05E+07 | 0.12 | -980.58  | 3.52 | 0.06 |
| E1 | GPM2 | 6A | AX.89630403 | 6.03E+08 | 0.32 | 702.15   | 3.75 | 0.07 |
| E1 | GY   | 6A | AX.89564135 | 5.95E+08 | 0.13 | 3.75     | 3.79 | 0.07 |
| E1 | GPM2 | 6A | AX.89437935 | 1.05E+07 | 0.11 | -1046.42 | 3.81 | 0.07 |
| E1 | GY   | 6A | AX.89665621 | 5.87E+06 | 0.38 | -2.70    | 3.92 | 0.07 |
| E1 | GY   | 6A | AX.89515569 | 5.56E+06 | 0.38 | -2.70    | 3.92 | 0.07 |
| E1 | GPM2 | 6A | AX.89625041 | 1.23E+07 | 0.14 | -864.50  | 3.31 | 0.06 |
| E1 | TKW  | 6A | AX.89403769 | 5.85E+08 | 0.07 | -1.83    | 3.47 | 0.06 |
| E1 | TKW  | 6A | AX.89334479 | 5.85E+08 | 0.07 | -1.83    | 3.47 | 0.06 |
| E1 | GPM2 | 6A | AX.89615289 | 1.23E+07 | 0.13 | -1078.27 | 4.51 | 0.08 |
| E1 | TKW  | 6A | AX.89391018 | 8.16E+05 | 0.39 | 0.86     | 3.06 | 0.05 |
| E1 | TKW  | 6A | AX.89775066 | 5.85E+08 | 0.05 | -2.01    | 3.36 | 0.06 |
| E1 | GPM2 | 6A | AX.89400057 | 1.09E+07 | 0.11 | -1046.42 | 3.81 | 0.07 |
| E1 | TKW  | 6A | AX.89734907 | 5.85E+08 | 0.07 | -1.83    | 3.47 | 0.06 |
| E1 | GPM2 | 6A | AX.86170193 | 6.73E+06 | 0.22 | -738.22  | 3.38 | 0.06 |
| E1 | TKW  | 6A | AX.89419752 | 5.85E+08 | 0.06 | -1.89    | 3.47 | 0.06 |
| E1 | TKW  | 6A | AX.89563727 | 5.85E+08 | 0.06 | -1.85    | 3.14 | 0.06 |
| E1 | TKW  | 6A | AX.89332896 | 5.85E+08 | 0.06 | -1.85    | 3.14 | 0.06 |
| E1 | GPM2 | 6A | AX.89773450 | 5.34E+08 | 0.07 | -1208.34 | 3.21 | 0.05 |
| E1 | TKW  | 6A | AX.86164579 | 5.85E+08 | 0.07 | -1.83    | 3.47 | 0.06 |
| E1 | TKW  | 6A | AX.86164577 | 5.85E+08 | 0.06 | -1.85    | 3.14 | 0.06 |
| E1 | GPM2 | 6A | AX.89489584 | 1.05E+07 | 0.11 | -1046.42 | 3.81 | 0.07 |
| E1 | TKW  | 6A | AX.89375285 | 5.85E+08 | 0.06 | -1.85    | 3.14 | 0.06 |
| E1 | TKW  | 6A | AX.86164580 | 5.85E+08 | 0.06 | -1.85    | 3.14 | 0.06 |
| E1 | TKW  | 6A | AX.89677520 | 5.85E+08 | 0.07 | -1.83    | 3.47 | 0.06 |
| E1 | TKW  | 6A | AX.89725066 | 5.85E+08 | 0.07 | -1.83    | 3.47 | 0.06 |
| E2 | SPM2 | 6A | AX.89392972 | 5.97E+08 | 0.15 | -16.38   | 3.04 | 0.05 |
| E2 | GY   | 6A | AX.89722624 | 4.59E+06 | 0.39 | 2.59     | 5.01 | 0.08 |
| E2 | GY   | 6A | AX.89722624 | 4.59E+06 | 0.39 | 2.59     | 5.01 | 0.08 |
| E2 | GY   | 6A | AX.89734293 | 1.40E+07 | 0.05 | -5.07    | 4.11 | 0.09 |
| E2 | SPM2 | 6A | AX.89524831 | 9.19E+07 | 0.18 | -15.12   | 3.04 | 0.05 |
| E2 | GY   | 6A | AX.89687785 | 1.23E+07 | 0.13 | -2.89    | 3.20 | 0.05 |
| E2 | GY   | 6A | AX.89687785 | 1.23E+07 | 0.13 | -2.89    | 3.20 | 0.05 |
| E2 | GPM2 | 6A | AX.89491145 | 6.73E+06 | 0.23 | -604.32  | 3.26 | 0.05 |
| E2 | GY   | 6A | AX.89404830 | 4.39E+06 | 0.37 | -2.11    | 3.49 | 0.06 |
| E2 | GY   | 6A | AX.89404830 | 4.39E+06 | 0.37 | -2.11    | 3.49 | 0.06 |
| E2 | GY   | 6A | AX.89640320 | 6.81E+06 | 0.38 | -2.59    | 5.01 | 0.09 |

|    |      |    |             |          |      |        |      |      |
|----|------|----|-------------|----------|------|--------|------|------|
| E2 | GY   | 6A | AX.89640320 | 6.81E+06 | 0.38 | -2.59  | 5.01 | 0.09 |
| E2 | GY   | 6A | AX.89312365 | 1.56E+07 | 0.06 | -4.22  | 3.43 | 0.05 |
| E2 | GY   | 6A | AX.89593169 | 1.92E+07 | 0.13 | -2.87  | 3.20 | 0.05 |
| E2 | GY   | 6A | AX.89593169 | 1.92E+07 | 0.13 | -2.87  | 3.20 | 0.05 |
| E2 | GY   | 6A | AX.89417558 | 1.40E+07 | 0.05 | -4.92  | 3.62 | 0.08 |
| E2 | GPS  | 6A | AX.89661491 | 5.69E+08 | 0.20 | -1.70  | 3.22 | 0.05 |
| E2 | GY   | 6A | AX.89371566 | 1.40E+07 | 0.07 | -4.94  | 5.05 | 0.10 |
| E2 | GPS  | 6A | AX.89729515 | 5.74E+08 | 0.33 | -1.90  | 5.16 | 0.08 |
| E2 | GPS  | 6A | AX.89475169 | 5.74E+08 | 0.34 | -1.82  | 4.82 | 0.07 |
| E2 | GY   | 6A | AX.89360250 | 1.40E+07 | 0.05 | -4.92  | 3.62 | 0.08 |
| E2 | GY   | 6A | AX.89360250 | 1.40E+07 | 0.05 | -4.92  | 3.62 | 0.08 |
| E2 | GPS  | 6A | AX.89450195 | 5.75E+08 | 0.39 | -1.56  | 3.88 | 0.06 |
| E2 | SPM2 | 6A | AX.89491809 | 6.12E+08 | 0.41 | -12.01 | 3.11 | 0.05 |
| E2 | GPS  | 6A | AX.89487900 | 6.03E+08 | 0.35 | 1.44   | 3.25 | 0.06 |
| E2 | SPM2 | 6A | AX.89588407 | 5.72E+08 | 0.15 | 16.53  | 3.15 | 0.05 |
| E2 | GPS  | 6A | AX.89596823 | 5.98E+08 | 0.33 | 1.60   | 3.78 | 0.06 |
| E2 | GPS  | 6A | AX.89670142 | 5.69E+08 | 0.20 | -1.70  | 3.22 | 0.05 |
| E2 | GY   | 6A | AX.89361597 | 1.37E+07 | 0.05 | -4.92  | 3.62 | 0.08 |
| E2 | GPS  | 6A | AX.89530982 | 5.74E+08 | 0.39 | -1.53  | 3.75 | 0.05 |
| E2 | GY   | 6A | AX.89515569 | 5.56E+06 | 0.38 | -2.01  | 3.23 | 0.05 |
| E2 | GY   | 6A | AX.89480000 | 1.55E+07 | 0.08 | -4.33  | 4.45 | 0.09 |
| E2 | SPM2 | 6A | AX.89316743 | 5.97E+08 | 0.15 | -16.30 | 3.08 | 0.05 |
| E2 | GPS  | 6A | AX.89623116 | 5.74E+08 | 0.39 | -1.53  | 3.75 | 0.05 |
| E2 | GY   | 6A | AX.89363729 | 1.21E+07 | 0.11 | -3.24  | 3.51 | 0.06 |
| E2 | GPS  | 6A | AX.89633608 | 5.75E+08 | 0.39 | -1.41  | 3.27 | 0.05 |
| E2 | GY   | 6A | AX.86162594 | 1.56E+07 | 0.07 | -3.98  | 3.66 | 0.05 |
| E2 | GY   | 6A | AX.86162594 | 1.56E+07 | 0.07 | -3.98  | 3.66 | 0.05 |
| E2 | GY   | 6A | AX.89646266 | 1.05E+07 | 0.12 | -2.99  | 3.25 | 0.05 |
| E2 | GY   | 6A | AX.89646266 | 1.05E+07 | 0.12 | -2.99  | 3.25 | 0.05 |
| E2 | GPS  | 6A | AX.89725205 | 5.69E+08 | 0.36 | -1.50  | 3.51 | 0.06 |
| E2 | GPS  | 6A | AX.89756239 | 5.99E+08 | 0.17 | 1.92   | 3.53 | 0.06 |
| E2 | GY   | 6A | AX.89340534 | 1.41E+07 | 0.05 | -4.92  | 3.62 | 0.08 |
| E2 | GY   | 6A | AX.89340534 | 1.41E+07 | 0.05 | -4.92  | 3.62 | 0.08 |
| E2 | GY   | 6A | AX.89412160 | 5.36E+06 | 0.38 | -2.04  | 3.32 | 0.05 |
| E2 | GY   | 6A | AX.89412160 | 5.36E+06 | 0.38 | -2.04  | 3.32 | 0.05 |
| E2 | GY   | 6A | AX.89340745 | 3.76E+06 | 0.43 | -2.08  | 3.56 | 0.06 |
| E2 | GY   | 6A | AX.89340745 | 3.76E+06 | 0.43 | -2.08  | 3.56 | 0.06 |
| E2 | GPS  | 6A | AX.89330835 | 5.72E+08 | 0.17 | -1.91  | 3.49 | 0.05 |
| E2 | GPS  | 6A | AX.89410236 | 6.02E+08 | 0.34 | 1.45   | 3.25 | 0.06 |
| E2 | GY   | 6A | AX.89341428 | 5.36E+06 | 0.38 | 2.21   | 3.81 | 0.05 |
| E2 | GPS  | 6A | AX.89685955 | 6.01E+08 | 0.35 | 1.38   | 3.02 | 0.05 |
| E2 | GPS  | 6A | AX.89586345 | 5.74E+08 | 0.35 | -1.78  | 4.66 | 0.07 |
| E2 | GPS  | 6A | AX.89541933 | 5.74E+08 | 0.39 | -1.53  | 3.75 | 0.05 |
| E2 | GPS  | 6A | AX.89495941 | 2.47E+07 | 0.29 | 1.57   | 3.47 | 0.05 |
| E2 | GPS  | 6A | AX.89429569 | 5.74E+08 | 0.39 | -1.53  | 3.75 | 0.05 |
| E2 | GY   | 6A | AX.89648510 | 3.76E+06 | 0.43 | -2.08  | 3.56 | 0.06 |
| E2 | GY   | 6A | AX.89648510 | 3.76E+06 | 0.43 | -2.08  | 3.56 | 0.06 |
| E2 | GPS  | 6A | AX.89457125 | 5.75E+08 | 0.39 | -1.56  | 3.88 | 0.06 |
| E2 | GY   | 6A | AX.89723063 | 5.33E+06 | 0.38 | -2.04  | 3.32 | 0.05 |
| E2 | GY   | 6A | AX.89723063 | 5.33E+06 | 0.38 | -2.04  | 3.32 | 0.05 |

|    |      |    |             |          |      |          |      |      |
|----|------|----|-------------|----------|------|----------|------|------|
| E2 | GY   | 6A | AX.89568723 | 1.87E+07 | 0.11 | -3.24    | 3.38 | 0.05 |
| E2 | GY   | 6A | AX.89568723 | 1.87E+07 | 0.11 | -3.24    | 3.38 | 0.05 |
| E2 | GY   | 6A | AX.89448704 | 1.21E+07 | 0.13 | -2.89    | 3.20 | 0.05 |
| E2 | GY   | 6A | AX.89448704 | 1.21E+07 | 0.13 | -2.89    | 3.20 | 0.05 |
| E2 | GY   | 6A | AX.89576276 | 5.43E+06 | 0.38 | -2.04    | 3.32 | 0.05 |
| E2 | GY   | 6A | AX.89576276 | 5.43E+06 | 0.38 | -2.04    | 3.32 | 0.05 |
| E2 | GPS  | 6A | AX.89455710 | 5.74E+08 | 0.39 | -1.53    | 3.75 | 0.05 |
| E2 | GPS  | 6A | AX.89642739 | 5.74E+08 | 0.34 | -1.89    | 5.11 | 0.08 |
| E2 | GY   | 6A | AX.89448954 | 5.36E+06 | 0.38 | -2.04    | 3.32 | 0.05 |
| E2 | GY   | 6A | AX.89448954 | 5.36E+06 | 0.38 | -2.04    | 3.32 | 0.05 |
| E2 | GPS  | 6A | AX.89728123 | 2.48E+07 | 0.29 | 1.53     | 3.29 | 0.05 |
| E2 | GPM2 | 6A | AX.89734293 | 1.40E+07 | 0.05 | -1162.89 | 3.41 | 0.07 |
| E2 | GPS  | 6A | AX.89517706 | 5.69E+08 | 0.20 | -1.70    | 3.22 | 0.05 |
| E2 | GPS  | 6A | AX.89588407 | 5.72E+08 | 0.15 | -1.88    | 3.18 | 0.05 |
| E2 | GY   | 6A | AX.89716589 | 5.13E+06 | 0.40 | 2.20     | 3.82 | 0.05 |
| E2 | GY   | 6A | AX.89716589 | 5.13E+06 | 0.40 | 2.20     | 3.82 | 0.05 |
| E2 | GPS  | 6A | AX.89628567 | 2.56E+07 | 0.38 | 1.37     | 3.09 | 0.05 |
| E2 | GY   | 6A | AX.89614453 | 6.81E+06 | 0.37 | -2.71    | 5.40 | 0.09 |
| E2 | GY   | 6A | AX.89614453 | 6.81E+06 | 0.37 | -2.71    | 5.40 | 0.09 |
| E2 | GPS  | 6A | AX.89399086 | 6.02E+08 | 0.35 | 1.44     | 3.25 | 0.06 |
| E2 | GY   | 6A | AX.89473894 | 3.77E+06 | 0.42 | -2.04    | 3.46 | 0.06 |
| E2 | GY   | 6A | AX.89473894 | 3.77E+06 | 0.42 | -2.04    | 3.46 | 0.06 |
| E2 | GY   | 6A | AX.89664596 | 5.36E+06 | 0.38 | -2.04    | 3.32 | 0.05 |
| E2 | GPS  | 6A | AX.89410481 | 5.99E+08 | 0.17 | 1.92     | 3.53 | 0.06 |
| E2 | GY   | 6A | AX.89451585 | 1.24E+07 | 0.13 | -3.64    | 4.87 | 0.08 |
| E2 | GY   | 6A | AX.89451585 | 1.24E+07 | 0.13 | -3.64    | 4.87 | 0.08 |
| E2 | GY   | 6A | AX.89312365 | 1.56E+07 | 0.06 | -4.22    | 3.43 | 0.05 |
| E2 | GY   | 6A | AX.89417558 | 1.40E+07 | 0.05 | -4.92    | 3.62 | 0.08 |
| E2 | GY   | 6A | AX.89418722 | 1.24E+07 | 0.13 | -3.64    | 4.87 | 0.08 |
| E2 | GY   | 6A | AX.89418722 | 1.24E+07 | 0.13 | -3.64    | 4.87 | 0.08 |
| E2 | GPS  | 6A | AX.89614453 | 6.81E+06 | 0.37 | -1.39    | 3.10 | 0.05 |
| E2 | GPS  | 6A | AX.89448675 | 2.48E+07 | 0.29 | 1.55     | 3.34 | 0.05 |
| E2 | GPS  | 6A | AX.89777656 | 6.03E+08 | 0.31 | 1.43     | 3.02 | 0.05 |
| E2 | GY   | 6A | AX.89525311 | 1.06E+07 | 0.10 | -3.19    | 3.19 | 0.05 |
| E2 | GY   | 6A | AX.89525311 | 1.06E+07 | 0.10 | -3.19    | 3.19 | 0.05 |
| E2 | GPS  | 6A | AX.89475441 | 5.74E+08 | 0.34 | -1.83    | 4.83 | 0.07 |
| E2 | GY   | 6A | AX.89615289 | 1.23E+07 | 0.13 | -2.89    | 3.20 | 0.05 |
| E2 | GY   | 6A | AX.89615289 | 1.23E+07 | 0.13 | -2.89    | 3.20 | 0.05 |
| E2 | GY   | 6A | AX.89384579 | 3.75E+06 | 0.42 | -2.04    | 3.46 | 0.06 |
| E2 | GY   | 6A | AX.89384579 | 3.75E+06 | 0.42 | -2.04    | 3.46 | 0.06 |
| E2 | GY   | 6A | AX.89596776 | 3.76E+06 | 0.42 | -2.04    | 3.46 | 0.06 |
| E2 | GY   | 6A | AX.89596776 | 3.76E+06 | 0.42 | -2.04    | 3.46 | 0.06 |
| E2 | GY   | 6A | AX.89661668 | 5.36E+06 | 0.38 | -2.04    | 3.32 | 0.05 |
| E2 | GY   | 6A | AX.89661668 | 5.36E+06 | 0.38 | -2.04    | 3.32 | 0.05 |
| E2 | GY   | 6A | AX.89351001 | 1.55E+07 | 0.08 | -4.33    | 4.45 | 0.09 |
| E2 | GY   | 6A | AX.89351001 | 1.55E+07 | 0.08 | -4.33    | 4.45 | 0.09 |
| E2 | GY   | 6A | AX.89341428 | 5.36E+06 | 0.38 | 2.21     | 3.81 | 0.05 |
| E2 | GY   | 6A | AX.89599312 | 6.73E+06 | 0.40 | 1.94     | 3.10 | 0.04 |
| E2 | GY   | 6A | AX.89599312 | 6.73E+06 | 0.40 | 1.94     | 3.10 | 0.04 |
| E2 | GY   | 6A | AX.89530334 | 1.40E+07 | 0.05 | -5.07    | 4.11 | 0.09 |

|    |      |    |             |          |      |         |      |      |
|----|------|----|-------------|----------|------|---------|------|------|
| E2 | GY   | 6A | AX.89530334 | 1.40E+07 | 0.05 | -5.07   | 4.11 | 0.09 |
| E2 | GY   | 6A | AX.89730615 | 6.73E+06 | 0.40 | 1.94    | 3.10 | 0.04 |
| E2 | GY   | 6A | AX.89730615 | 6.73E+06 | 0.40 | 1.94    | 3.10 | 0.04 |
| E2 | GY   | 6A | AX.89459019 | 3.76E+06 | 0.43 | -2.04   | 3.46 | 0.05 |
| E2 | GY   | 6A | AX.89459019 | 3.76E+06 | 0.43 | -2.04   | 3.46 | 0.05 |
| E2 | GY   | 6A | AX.89320580 | 1.85E+07 | 0.10 | -3.65   | 4.04 | 0.07 |
| E2 | GY   | 6A | AX.89320580 | 1.85E+07 | 0.10 | -3.65   | 4.04 | 0.07 |
| E2 | GPS  | 6A | AX.89422901 | 5.74E+08 | 0.33 | -1.93   | 5.31 | 0.08 |
| E2 | GY   | 6A | AX.89389958 | 5.60E+06 | 0.40 | -2.07   | 3.45 | 0.05 |
| E2 | GY   | 6A | AX.89389958 | 5.60E+06 | 0.40 | -2.07   | 3.45 | 0.05 |
| E2 | GY   | 6A | AX.89449758 | 5.13E+06 | 0.41 | 2.29    | 4.13 | 0.06 |
| E2 | GY   | 6A | AX.89449758 | 5.13E+06 | 0.41 | 2.29    | 4.13 | 0.06 |
| E2 | GY   | 6A | AX.89602780 | 5.33E+06 | 0.40 | -2.15   | 3.68 | 0.06 |
| E2 | GY   | 6A | AX.89602780 | 5.33E+06 | 0.40 | -2.15   | 3.68 | 0.06 |
| E2 | GY   | 6A | AX.89716829 | 5.32E+06 | 0.38 | -2.04   | 3.32 | 0.05 |
| E2 | GY   | 6A | AX.89716829 | 5.32E+06 | 0.38 | -2.04   | 3.32 | 0.05 |
| E2 | GY   | 6A | AX.89566655 | 1.86E+07 | 0.11 | -3.82   | 4.52 | 0.08 |
| E2 | GY   | 6A | AX.89566655 | 1.86E+07 | 0.11 | -3.82   | 4.52 | 0.08 |
| E2 | GY   | 6A | AX.89664596 | 5.36E+06 | 0.38 | -2.04   | 3.32 | 0.05 |
| E2 | GY   | 6A | AX.89568464 | 5.39E+07 | 0.46 | 1.93    | 3.18 | 0.04 |
| E2 | GY   | 6A | AX.89568464 | 5.39E+07 | 0.46 | 1.93    | 3.18 | 0.04 |
| E2 | GY   | 6A | AX.89544771 | 5.12E+06 | 0.37 | 2.47    | 4.58 | 0.07 |
| E2 | GY   | 6A | AX.89544771 | 5.12E+06 | 0.37 | 2.47    | 4.58 | 0.07 |
| E2 | GY   | 6A | AX.89393684 | 4.58E+06 | 0.37 | -2.11   | 3.49 | 0.06 |
| E2 | GY   | 6A | AX.89393684 | 4.58E+06 | 0.37 | -2.11   | 3.49 | 0.06 |
| E2 | GY   | 6A | AX.89406931 | 7.50E+07 | 0.07 | -4.08   | 3.44 | 0.07 |
| E2 | GY   | 6A | AX.89394835 | 5.13E+06 | 0.38 | -2.04   | 3.32 | 0.05 |
| E2 | GY   | 6A | AX.89394835 | 5.13E+06 | 0.38 | -2.04   | 3.32 | 0.05 |
| E2 | GPS  | 6A | AX.89635017 | 5.74E+08 | 0.34 | -1.62   | 3.93 | 0.06 |
| E2 | GY   | 6A | AX.89465182 | 3.80E+06 | 0.43 | -2.08   | 3.56 | 0.06 |
| E2 | GY   | 6A | AX.89465182 | 3.80E+06 | 0.43 | -2.08   | 3.56 | 0.06 |
| E2 | GY   | 6A | AX.89327045 | 1.45E+07 | 0.06 | -4.16   | 3.36 | 0.07 |
| E2 | GY   | 6A | AX.89327045 | 1.45E+07 | 0.06 | -4.16   | 3.36 | 0.07 |
| E2 | GPS  | 6A | AX.89506887 | 5.73E+08 | 0.29 | -1.72   | 4.04 | 0.06 |
| E2 | GY   | 6A | AX.89415699 | 3.76E+06 | 0.42 | -2.04   | 3.46 | 0.06 |
| E2 | GY   | 6A | AX.89684726 | 5.36E+06 | 0.38 | -2.01   | 3.23 | 0.05 |
| E2 | GY   | 6A | AX.89684726 | 5.36E+06 | 0.38 | -2.01   | 3.23 | 0.05 |
| E2 | GPM2 | 6A | AX.89544771 | 5.12E+06 | 0.37 | 529.44  | 3.35 | 0.06 |
| E2 | GY   | 6A | AX.89734293 | 1.40E+07 | 0.05 | -5.07   | 4.11 | 0.09 |
| E2 | GY   | 6A | AX.89734380 | 5.53E+06 | 0.39 | 2.19    | 3.76 | 0.05 |
| E2 | GY   | 6A | AX.89754513 | 1.56E+07 | 0.07 | -3.98   | 3.66 | 0.05 |
| E2 | GY   | 6A | AX.89754513 | 1.56E+07 | 0.07 | -3.98   | 3.66 | 0.05 |
| E2 | GY   | 6A | AX.89402721 | 5.48E+06 | 0.39 | 2.08    | 3.47 | 0.05 |
| E2 | GY   | 6A | AX.89402721 | 5.48E+06 | 0.39 | 2.08    | 3.47 | 0.05 |
| E2 | GPS  | 6A | AX.89767068 | 5.75E+08 | 0.38 | -1.48   | 3.49 | 0.05 |
| E2 | GY   | 6A | AX.89581832 | 1.87E+07 | 0.10 | -3.72   | 4.01 | 0.07 |
| E2 | GY   | 6A | AX.89581832 | 1.87E+07 | 0.10 | -3.72   | 4.01 | 0.07 |
| E2 | GY   | 6A | AX.89403262 | 1.21E+07 | 0.11 | -3.14   | 3.19 | 0.05 |
| E2 | GY   | 6A | AX.89403262 | 1.21E+07 | 0.11 | -3.14   | 3.19 | 0.05 |
| E2 | GPM2 | 6A | AX.89717492 | 7.39E+06 | 0.23 | -594.77 | 3.25 | 0.05 |

|    |      |    |             |          |      |         |      |      |
|----|------|----|-------------|----------|------|---------|------|------|
| E2 | GPS  | 6A | AX.89357456 | 5.74E+08 | 0.34 | -1.89   | 5.11 | 0.08 |
| E2 | GPS  | 6A | AX.89671956 | 6.01E+08 | 0.35 | 1.44    | 3.25 | 0.06 |
| E2 | GPS  | 6A | AX.89614685 | 5.74E+08 | 0.34 | -1.82   | 4.82 | 0.07 |
| E2 | GPS  | 6A | AX.89770182 | 5.74E+08 | 0.39 | -1.56   | 3.88 | 0.06 |
| E2 | GY   | 6A | AX.89369831 | 5.55E+06 | 0.38 | -1.98   | 3.16 | 0.05 |
| E2 | GY   | 6A | AX.89369831 | 5.55E+06 | 0.38 | -1.98   | 3.16 | 0.05 |
| E2 | GY   | 6A | AX.89498345 | 5.36E+06 | 0.39 | -2.04   | 3.34 | 0.05 |
| E2 | GY   | 6A | AX.89665621 | 5.87E+06 | 0.38 | -2.01   | 3.23 | 0.05 |
| E2 | GPS  | 6A | AX.89323135 | 5.74E+08 | 0.34 | -1.89   | 5.11 | 0.08 |
| E2 | GPS  | 6A | AX.86167599 | 5.74E+08 | 0.33 | -1.86   | 4.95 | 0.08 |
| E2 | GY   | 6A | AX.89406931 | 7.50E+07 | 0.07 | -4.08   | 3.44 | 0.07 |
| E2 | GY   | 6A | AX.89407050 | 4.10E+06 | 0.43 | -2.09   | 3.60 | 0.06 |
| E2 | GY   | 6A | AX.89407050 | 4.10E+06 | 0.43 | -2.09   | 3.60 | 0.06 |
| E2 | GY   | 6A | AX.89371566 | 1.40E+07 | 0.07 | -4.94   | 5.05 | 0.10 |
| E2 | GPS  | 6A | AX.89762980 | 5.74E+08 | 0.39 | -1.56   | 3.88 | 0.06 |
| E2 | GPS  | 6A | AX.89697696 | 5.74E+08 | 0.34 | -1.85   | 4.95 | 0.08 |
| E2 | GPS  | 6A | AX.86164444 | 5.70E+08 | 0.21 | -1.62   | 3.01 | 0.04 |
| E2 | GPS  | 6A | AX.89333624 | 5.74E+08 | 0.32 | -1.78   | 4.53 | 0.07 |
| E2 | GPS  | 6A | AX.89678981 | 5.74E+08 | 0.34 | -1.82   | 4.82 | 0.07 |
| E2 | GPS  | 6A | AX.89369691 | 6.02E+08 | 0.31 | 1.43    | 3.02 | 0.05 |
| E2 | GPS  | 6A | AX.86164450 | 5.70E+08 | 0.21 | -1.62   | 3.01 | 0.04 |
| E2 | GPS  | 6A | AX.89551123 | 5.65E+08 | 0.36 | -1.43   | 3.25 | 0.06 |
| E2 | GPS  | 6A | AX.89389161 | 5.74E+08 | 0.34 | -1.86   | 5.00 | 0.08 |
| E2 | GPS  | 6A | AX.89344236 | 5.74E+08 | 0.34 | -1.89   | 5.11 | 0.08 |
| E2 | GPS  | 6A | AX.89670104 | 5.70E+08 | 0.35 | -1.56   | 3.72 | 0.07 |
| E2 | GPS  | 6A | AX.89537531 | 2.47E+07 | 0.29 | 1.55    | 3.34 | 0.05 |
| E2 | GY   | 6A | AX.89361597 | 1.37E+07 | 0.05 | -4.92   | 3.62 | 0.08 |
| E2 | GY   | 6A | AX.89515569 | 5.56E+06 | 0.38 | -2.01   | 3.23 | 0.05 |
| E2 | GPS  | 6A | AX.89318220 | 5.70E+08 | 0.21 | -1.62   | 3.01 | 0.04 |
| E2 | GPS  | 6A | AX.89452196 | 5.74E+08 | 0.33 | -1.88   | 5.06 | 0.08 |
| E2 | GPS  | 6A | AX.89431171 | 5.74E+08 | 0.39 | -1.53   | 3.75 | 0.05 |
| E2 | GY   | 6A | AX.89480000 | 1.55E+07 | 0.08 | -4.33   | 4.45 | 0.09 |
| E2 | GPS  | 6A | AX.89589873 | 5.74E+08 | 0.39 | -1.53   | 3.75 | 0.05 |
| E2 | GPS  | 6A | AX.89504495 | 2.70E+07 | 0.37 | 1.38    | 3.05 | 0.05 |
| E2 | GPS  | 6A | AX.89450221 | 2.49E+07 | 0.38 | 1.37    | 3.09 | 0.05 |
| E2 | GPS  | 6A | AX.89514445 | 5.74E+08 | 0.34 | -1.84   | 4.94 | 0.08 |
| E2 | GY   | 6A | AX.89363729 | 1.21E+07 | 0.11 | -3.24   | 3.51 | 0.06 |
| E2 | GPS  | 6A | AX.89539113 | 5.82E+08 | 0.23 | -1.57   | 3.01 | 0.04 |
| E2 | GPS  | 6A | AX.89531685 | 2.56E+07 | 0.38 | 1.37    | 3.09 | 0.05 |
| E2 | GPS  | 6A | AX.89757572 | 5.73E+08 | 0.17 | -1.91   | 3.55 | 0.05 |
| E2 | GPS  | 6A | AX.89476581 | 4.66E+06 | 0.31 | 1.46    | 3.16 | 0.05 |
| E2 | GPS  | 6A | AX.89675413 | 5.74E+08 | 0.34 | -1.86   | 5.00 | 0.08 |
| E2 | GPS  | 6A | AX.89338802 | 2.48E+07 | 0.29 | 1.49    | 3.13 | 0.05 |
| E2 | GPS  | 6A | AX.89506289 | 5.63E+08 | 0.18 | -1.71   | 3.04 | 0.04 |
| E2 | GPS  | 6A | AX.89552426 | 5.74E+08 | 0.34 | -1.89   | 5.11 | 0.08 |
| E2 | GPS  | 6A | AX.89334292 | 5.74E+08 | 0.34 | -1.86   | 5.00 | 0.08 |
| E2 | GPS  | 6A | AX.89712898 | 2.48E+07 | 0.38 | 1.37    | 3.09 | 0.05 |
| E2 | GPS  | 6A | AX.89574596 | 5.74E+08 | 0.33 | -1.90   | 5.16 | 0.08 |
| E2 | GPM2 | 6A | AX.89329900 | 6.73E+06 | 0.23 | -604.32 | 3.26 | 0.05 |
| E2 | GPS  | 6A | AX.89600827 | 2.34E+07 | 0.49 | -1.39   | 3.31 | 0.06 |



|    |      |    |             |          |      |          |      |      |
|----|------|----|-------------|----------|------|----------|------|------|
| E2 | GPM2 | 6A | AX.89340534 | 1.41E+07 | 0.05 | -1225.42 | 3.47 | 0.07 |
| E2 | GY   | 6A | AX.89734380 | 5.53E+06 | 0.39 | 2.19     | 3.76 | 0.05 |
| E2 | GPS  | 6A | AX.89384690 | 5.82E+08 | 0.15 | -1.98    | 3.40 | 0.05 |
| E2 | GPS  | 6A | AX.89666483 | 5.75E+08 | 0.38 | -1.54    | 3.77 | 0.05 |
| E2 | GPS  | 6A | AX.89372359 | 5.74E+08 | 0.34 | -1.81    | 4.77 | 0.07 |
| E2 | GPS  | 6A | AX.89615146 | 5.83E+08 | 0.23 | -1.57    | 3.01 | 0.04 |
| E2 | GPS  | 6A | AX.89387258 | 5.69E+08 | 0.20 | -1.70    | 3.22 | 0.05 |
| E2 | GPS  | 6A | AX.89529892 | 5.74E+08 | 0.34 | -1.89    | 5.11 | 0.08 |
| E2 | GPS  | 6A | AX.89342065 | 5.74E+08 | 0.33 | -1.87    | 5.00 | 0.08 |
| E2 | GPM2 | 6A | AX.89775066 | 5.85E+08 | 0.05 | 1103.92  | 3.08 | 0.02 |
| E2 | GPS  | 6A | AX.89709762 | 5.82E+08 | 0.23 | -1.57    | 3.01 | 0.04 |
| E2 | GPS  | 6A | AX.89561094 | 6.03E+08 | 0.31 | 1.43     | 3.02 | 0.05 |
| E2 | GPS  | 6A | AX.89435259 | 5.70E+08 | 0.35 | -1.56    | 3.72 | 0.07 |
| E2 | GPS  | 6A | AX.89351448 | 5.74E+08 | 0.34 | -1.79    | 4.70 | 0.07 |
| E2 | GPS  | 6A | AX.89542231 | 2.78E+07 | 0.34 | 1.40     | 3.07 | 0.05 |
| E2 | GPS  | 6A | AX.89741579 | 5.74E+08 | 0.34 | -1.89    | 5.11 | 0.08 |
| E2 | GY   | 6A | AX.89567056 | 1.57E+07 | 0.09 | -4.02    | 4.44 | 0.06 |
| E2 | GPS  | 6A | AX.89479044 | 6.02E+08 | 0.35 | 1.44     | 3.25 | 0.06 |
| E2 | GPS  | 6A | AX.89633350 | 5.74E+08 | 0.34 | -1.82    | 4.82 | 0.07 |
| E2 | GY   | 6A | AX.89451275 | 5.84E+07 | 0.07 | -3.91    | 3.55 | 0.04 |
| E2 | GY   | 6A | AX.89451275 | 5.84E+07 | 0.07 | -3.91    | 3.55 | 0.04 |
| E2 | GPS  | 6A | AX.89678625 | 5.83E+08 | 0.23 | -1.57    | 3.01 | 0.04 |
| E2 | GY   | 6A | AX.89738527 | 1.87E+07 | 0.13 | -2.87    | 3.16 | 0.05 |
| E2 | GY   | 6A | AX.89738527 | 1.87E+07 | 0.13 | -2.87    | 3.16 | 0.05 |
| E2 | GPS  | 6A | AX.89741467 | 5.68E+08 | 0.36 | -1.50    | 3.51 | 0.06 |
| E2 | GPS  | 6A | AX.89456764 | 2.57E+07 | 0.35 | 1.41     | 3.13 | 0.05 |
| E2 | GY   | 6A | AX.89665621 | 5.87E+06 | 0.38 | -2.01    | 3.23 | 0.05 |
| E2 | GPS  | 6A | AX.89708700 | 6.03E+08 | 0.35 | 1.44     | 3.25 | 0.06 |
| E2 | GPS  | 6A | AX.89334703 | 2.63E+07 | 0.37 | 1.49     | 3.50 | 0.06 |
| E2 | GPS  | 6A | AX.89380311 | 2.48E+07 | 0.28 | 1.57     | 3.39 | 0.05 |
| E2 | GY   | 6A | AX.89760277 | 5.81E+07 | 0.07 | -3.91    | 3.55 | 0.04 |
| E2 | GPS  | 6A | AX.89362676 | 5.73E+08 | 0.16 | -2.00    | 3.70 | 0.06 |
| E2 | GPS  | 6A | AX.86162777 | 2.49E+07 | 0.38 | 1.37     | 3.09 | 0.05 |
| E2 | GPS  | 6A | AX.89701627 | 5.74E+08 | 0.39 | -1.53    | 3.75 | 0.05 |
| E2 | GPS  | 6A | AX.89602100 | 5.74E+08 | 0.34 | -1.86    | 5.00 | 0.08 |
| E2 | GPS  | 6A | AX.89495733 | 5.74E+08 | 0.34 | -1.89    | 5.11 | 0.08 |
| E2 | GPS  | 6A | AX.89542055 | 5.73E+08 | 0.15 | -2.06    | 3.65 | 0.06 |
| E2 | GY   | 6A | AX.89348394 | 4.60E+06 | 0.43 | -2.19    | 3.90 | 0.06 |
| E2 | GY   | 6A | AX.89348394 | 4.60E+06 | 0.43 | -2.19    | 3.90 | 0.06 |
| E2 | GPS  | 6A | AX.89439930 | 5.74E+08 | 0.35 | -1.78    | 4.66 | 0.07 |
| E2 | GY   | 6A | AX.89717492 | 7.39E+06 | 0.23 | -2.58    | 3.89 | 0.06 |
| E2 | GPS  | 6A | AX.89494618 | 5.74E+08 | 0.35 | -1.78    | 4.66 | 0.07 |
| E2 | GY   | 6A | AX.89433276 | 5.48E+06 | 0.43 | 2.32     | 4.29 | 0.06 |
| E2 | GPM2 | 6A | AX.89724488 | 6.73E+06 | 0.23 | -604.32  | 3.26 | 0.05 |
| E2 | GY   | 6A | AX.89743239 | 1.87E+07 | 0.10 | -3.65    | 4.04 | 0.07 |
| E2 | GY   | 6A | AX.89743239 | 1.87E+07 | 0.10 | -3.65    | 4.04 | 0.07 |
| E2 | GY   | 6A | AX.89492323 | 6.72E+06 | 0.40 | 2.04     | 3.38 | 0.04 |
| E2 | GY   | 6A | AX.89492323 | 6.72E+06 | 0.40 | 2.04     | 3.38 | 0.04 |
| E2 | GY   | 6A | AX.89595207 | 3.77E+06 | 0.43 | -2.11    | 3.66 | 0.06 |
| E2 | GPS  | 6A | AX.89320670 | 2.47E+07 | 0.29 | 1.55     | 3.34 | 0.05 |

|    |      |    |             |          |      |          |      |      |
|----|------|----|-------------|----------|------|----------|------|------|
| E2 | GPS  | 6A | AX.89346075 | 5.73E+08 | 0.17 | -1.91    | 3.49 | 0.05 |
| E2 | GPS  | 6A | AX.89668027 | 5.69E+08 | 0.20 | -1.70    | 3.22 | 0.05 |
| E2 | GPM2 | 6A | AX.89327067 | 6.73E+06 | 0.23 | -604.32  | 3.26 | 0.05 |
| E2 | GPS  | 6A | AX.89727124 | 4.67E+06 | 0.33 | 1.45     | 3.20 | 0.05 |
| E2 | GY   | 6A | AX.89753335 | 3.34E+06 | 0.22 | 2.32     | 3.10 | 0.07 |
| E2 | GY   | 6A | AX.89624935 | 1.21E+07 | 0.13 | -2.89    | 3.20 | 0.05 |
| E2 | GY   | 6A | AX.89624935 | 1.21E+07 | 0.13 | -2.89    | 3.20 | 0.05 |
| E2 | GPS  | 6A | AX.89658052 | 5.98E+08 | 0.17 | 1.92     | 3.53 | 0.06 |
| E2 | GY   | 6A | AX.89567056 | 1.57E+07 | 0.09 | -4.02    | 4.44 | 0.06 |
| E2 | GPS  | 6A | AX.89679693 | 5.75E+08 | 0.39 | -1.56    | 3.88 | 0.06 |
| E2 | GY   | 6A | AX.89498345 | 5.36E+06 | 0.39 | -2.04    | 3.34 | 0.05 |
| E2 | GPS  | 6A | AX.89521580 | 2.48E+07 | 0.29 | 1.55     | 3.34 | 0.05 |
| E2 | GY   | 6A | AX.89760277 | 5.81E+07 | 0.07 | -3.91    | 3.55 | 0.04 |
| E2 | GPS  | 6A | AX.89543599 | 3.12E+07 | 0.47 | 1.35     | 3.15 | 0.05 |
| E2 | GPS  | 6A | AX.89551569 | 5.74E+08 | 0.34 | -1.86    | 5.00 | 0.08 |
| E2 | GPS  | 6A | AX.89496208 | 5.79E+08 | 0.15 | -1.96    | 3.42 | 0.05 |
| E2 | GPS  | 6A | AX.89514128 | 5.79E+08 | 0.15 | -1.92    | 3.17 | 0.05 |
| E2 | GY   | 6A | AX.89595207 | 3.77E+06 | 0.43 | -2.11    | 3.66 | 0.06 |
| E2 | GPS  | 6A | AX.89344114 | 5.82E+08 | 0.20 | -1.80    | 3.48 | 0.05 |
| E2 | GY   | 6A | AX.89717492 | 7.39E+06 | 0.23 | -2.58    | 3.89 | 0.06 |
| E2 | GPS  | 6A | AX.89372687 | 6.02E+08 | 0.31 | 1.43     | 3.02 | 0.05 |
| E2 | GPS  | 6A | AX.89338412 | 5.74E+08 | 0.34 | -1.89    | 5.11 | 0.08 |
| E2 | GPM2 | 6A | AX.89530334 | 1.40E+07 | 0.05 | -1162.89 | 3.41 | 0.07 |
| E2 | GY   | 6A | AX.89433276 | 5.48E+06 | 0.43 | 2.32     | 4.29 | 0.06 |
| E2 | GPS  | 6A | AX.89380329 | 5.74E+08 | 0.34 | -1.85    | 4.95 | 0.08 |
| E2 | GPS  | 6A | AX.89436826 | 6.03E+08 | 0.35 | 1.44     | 3.25 | 0.06 |
| E2 | GY   | 6A | AX.89561952 | 1.45E+07 | 0.09 | -3.85    | 3.97 | 0.07 |
| E2 | GY   | 6A | AX.89561952 | 1.45E+07 | 0.09 | -3.85    | 3.97 | 0.07 |
| E2 | GPS  | 6A | AX.89533325 | 5.74E+08 | 0.34 | -1.86    | 5.00 | 0.08 |
| E2 | GPS  | 6A | AX.89632590 | 5.73E+08 | 0.17 | -1.91    | 3.49 | 0.05 |
| E2 | GPS  | 6A | AX.89725443 | 5.74E+08 | 0.39 | -1.53    | 3.75 | 0.05 |
| E2 | GPS  | 6A | AX.89369974 | 5.74E+08 | 0.39 | -1.53    | 3.75 | 0.05 |
| E2 | GPS  | 6A | AX.89531960 | 5.74E+08 | 0.34 | -1.87    | 5.05 | 0.08 |
| E2 | GY   | 6A | AX.89415699 | 3.76E+06 | 0.42 | -2.04    | 3.46 | 0.06 |
| E2 | GPS  | 6A | AX.89500120 | 5.74E+08 | 0.35 | -1.83    | 4.89 | 0.08 |
| E2 | GPS  | 6A | AX.89363090 | 5.74E+08 | 0.35 | -1.83    | 4.89 | 0.08 |
| E2 | GPS  | 6A | AX.89712497 | 5.83E+08 | 0.23 | -1.57    | 3.01 | 0.04 |
| E2 | GPM2 | 6A | AX.86170193 | 6.73E+06 | 0.23 | -604.32  | 3.26 | 0.05 |
| E2 | GPS  | 6A | AX.89320322 | 5.98E+08 | 0.33 | 1.54     | 3.56 | 0.05 |
| E2 | GY   | 6A | AX.89753335 | 3.34E+06 | 0.22 | 2.32     | 3.10 | 0.07 |
| E2 | GPS  | 6A | AX.89675302 | 2.37E+07 | 0.36 | 1.49     | 3.47 | 0.06 |
| E2 | GPS  | 6A | AX.89618501 | 5.74E+08 | 0.33 | -1.90    | 5.16 | 0.08 |
| E2 | GPS  | 6A | AX.89321660 | 5.70E+08 | 0.35 | -1.60    | 3.86 | 0.07 |
| E2 | GPS  | 6A | AX.89770131 | 5.74E+08 | 0.34 | -1.86    | 5.00 | 0.08 |
| E2 | GPS  | 6A | AX.89560637 | 5.74E+08 | 0.34 | -1.86    | 5.00 | 0.08 |
| E2 | GPS  | 6A | AX.89458005 | 5.83E+08 | 0.23 | -1.57    | 3.01 | 0.04 |
| E2 | GPS  | 6A | AX.89630899 | 5.83E+08 | 0.23 | -1.57    | 3.01 | 0.04 |
| E2 | GPS  | 6A | AX.89531359 | 2.56E+07 | 0.36 | 1.61     | 3.97 | 0.06 |
| E2 | GPM2 | 6A | AX.89658761 | 6.73E+06 | 0.23 | -604.32  | 3.26 | 0.05 |
| E2 | GPS  | 6A | AX.89364988 | 5.69E+08 | 0.30 | -1.65    | 3.80 | 0.06 |

|    |      |    |             |          |      |          |      |      |
|----|------|----|-------------|----------|------|----------|------|------|
| E2 | GPS  | 6A | AX.89716670 | 5.69E+08 | 0.36 | -1.50    | 3.51 | 0.06 |
| E2 | GPS  | 6A | AX.89631336 | 5.74E+08 | 0.39 | -1.53    | 3.75 | 0.05 |
| E2 | GPS  | 6A | AX.89492509 | 5.75E+08 | 0.38 | -1.57    | 3.85 | 0.06 |
| E2 | GPS  | 6A | AX.89465934 | 5.69E+08 | 0.20 | -1.70    | 3.22 | 0.05 |
| E2 | GPS  | 6A | AX.89498743 | 5.74E+08 | 0.34 | -1.86    | 5.00 | 0.08 |
| E2 | GPS  | 6A | AX.89764070 | 5.74E+08 | 0.33 | -1.90    | 5.14 | 0.08 |
| E2 | GPS  | 6A | AX.89353374 | 6.02E+08 | 0.31 | 1.43     | 3.02 | 0.05 |
| E2 | GPS  | 6A | AX.89715660 | 5.82E+08 | 0.23 | -1.57    | 3.01 | 0.04 |
| E2 | GPS  | 6A | AX.89617092 | 5.69E+08 | 0.17 | -1.83    | 3.30 | 0.05 |
| E2 | GPS  | 6A | AX.89543860 | 5.74E+08 | 0.34 | -1.86    | 5.00 | 0.08 |
| E2 | GPS  | 6A | AX.89506754 | 5.98E+08 | 0.18 | 1.88     | 3.51 | 0.06 |
| E2 | GPS  | 6A | AX.89641015 | 3.09E+07 | 0.47 | 1.35     | 3.15 | 0.05 |
| E2 | GPS  | 6A | AX.89312948 | 5.75E+08 | 0.38 | -1.63    | 4.15 | 0.06 |
| E2 | GPS  | 6A | AX.89532249 | 6.03E+08 | 0.35 | 1.44     | 3.25 | 0.06 |
| E2 | GPS  | 6A | AX.89458593 | 6.02E+08 | 0.35 | 1.44     | 3.25 | 0.06 |
| E2 | GPS  | 6A | AX.89740694 | 5.82E+08 | 0.20 | -1.80    | 3.48 | 0.05 |
| E2 | GPS  | 6A | AX.89504429 | 2.49E+07 | 0.38 | 1.37     | 3.09 | 0.05 |
| E2 | GPS  | 6A | AX.89432790 | 5.99E+08 | 0.23 | 1.67     | 3.36 | 0.06 |
| E2 | GPS  | 6A | AX.89589555 | 5.74E+08 | 0.39 | -1.53    | 3.75 | 0.05 |
| E2 | GPS  | 6A | AX.89687959 | 5.74E+08 | 0.39 | -1.53    | 3.75 | 0.05 |
| E2 | GPS  | 6A | AX.89563488 | 5.74E+08 | 0.34 | -1.82    | 4.82 | 0.07 |
| E2 | GPS  | 6A | AX.89620291 | 2.39E+07 | 0.45 | -1.33    | 3.03 | 0.05 |
| E2 | GPS  | 6A | AX.89558297 | 5.72E+08 | 0.19 | -1.91    | 3.72 | 0.06 |
| E2 | GPM2 | 6A | AX.89417558 | 1.40E+07 | 0.05 | -1225.42 | 3.47 | 0.07 |
| E2 | GPS  | 6A | AX.89441093 | 6.02E+08 | 0.35 | 1.44     | 3.25 | 0.06 |
| E2 | GPM2 | 6A | AX.89340253 | 7.15E+06 | 0.12 | -781.58  | 3.20 | 0.05 |
| E2 | GPS  | 6A | AX.89671323 | 5.74E+08 | 0.34 | -1.89    | 5.11 | 0.08 |
| E2 | GPS  | 6A | AX.89497354 | 5.72E+08 | 0.19 | -1.91    | 3.72 | 0.06 |
| E2 | GPS  | 6A | AX.89527207 | 5.75E+08 | 0.38 | -1.54    | 3.77 | 0.05 |
| E2 | GPM2 | 6A | AX.89722624 | 4.59E+06 | 0.39 | 543.29   | 3.53 | 0.06 |
| E2 | GPM2 | 6A | AX.89360250 | 1.40E+07 | 0.05 | -1225.42 | 3.47 | 0.07 |
| E2 | GPS  | 6A | AX.89583112 | 2.49E+07 | 0.28 | 1.59     | 3.49 | 0.05 |
| E2 | GPM2 | 6A | AX.89361597 | 1.37E+07 | 0.05 | -1225.42 | 3.47 | 0.07 |
| E2 | GPS  | 6A | AX.89728533 | 5.75E+08 | 0.30 | -1.47    | 3.15 | 0.04 |
| E2 | GPS  | 6A | AX.89315916 | 5.73E+08 | 0.17 | -2.00    | 3.77 | 0.06 |
| E2 | GPS  | 6A | AX.89712175 | 2.56E+07 | 0.38 | 1.37     | 3.09 | 0.05 |
| E2 | GPS  | 6A | AX.89470719 | 5.74E+08 | 0.34 | -1.89    | 5.11 | 0.08 |
| E2 | GPS  | 6A | AX.89597469 | 5.74E+08 | 0.34 | -1.89    | 5.11 | 0.08 |
| E2 | GPM2 | 6A | AX.89371566 | 1.40E+07 | 0.07 | -984.16  | 3.28 | 0.06 |
| E2 | GPS  | 6A | AX.89549685 | 6.01E+08 | 0.35 | 1.44     | 3.25 | 0.06 |
| E3 | GPS  | 6A | AX.89325506 | 1.67E+06 | 0.08 | 3.77     | 3.17 | 0.02 |
| E3 | GPS  | 6A | AX.89627110 | 5.99E+08 | 0.11 | 3.21     | 3.25 | 0.04 |
| E3 | GPS  | 6A | AX.89465276 | 5.99E+08 | 0.11 | 3.21     | 3.25 | 0.04 |
| E3 | GPS  | 6A | AX.89358478 | 5.99E+08 | 0.11 | 3.21     | 3.25 | 0.04 |
| E3 | GPS  | 6A | AX.89722217 | 5.99E+08 | 0.11 | 3.21     | 3.25 | 0.04 |
| E3 | GPS  | 6A | AX.89484965 | 5.99E+08 | 0.11 | 3.21     | 3.25 | 0.04 |
| E3 | GPS  | 6A | AX.89755431 | 5.99E+08 | 0.11 | 3.21     | 3.25 | 0.04 |
| E3 | GY   | 6A | AX.89561657 | 6.03E+08 | 0.10 | -4.78    | 3.35 | 0.02 |
| E3 | SPM2 | 6A | AX.89311728 | 6.14E+08 | 0.35 | 21.52    | 3.28 | 0.07 |
| E3 | SPM2 | 6A | AX.89354031 | 6.14E+08 | 0.33 | 28.14    | 5.18 | 0.11 |

|    |      |    |               |          |      |        |      |      |
|----|------|----|---------------|----------|------|--------|------|------|
| E3 | SPM2 | 6A | X.89411770_OT | 6.14E+08 | 0.36 | 22.44  | 3.55 | 0.08 |
| E3 | SPM2 | 6A | AX.89337491   | 6.14E+08 | 0.37 | 21.30  | 3.27 | 0.08 |
| E3 | SPM2 | 6A | X.89511535_OT | 6.14E+08 | 0.36 | 22.54  | 3.56 | 0.08 |
| E3 | SPM2 | 6A | X.89403264_OT | 6.14E+08 | 0.36 | 22.54  | 3.56 | 0.08 |
| E3 | SPM2 | 6A | AX.89687446   | 6.14E+08 | 0.33 | 24.17  | 3.90 | 0.08 |
| E3 | SPM2 | 6A | AX.89728011   | 6.14E+08 | 0.34 | 27.03  | 4.87 | 0.10 |
| E3 | SPM2 | 6A | AX.89406500   | 6.14E+08 | 0.34 | 25.89  | 4.54 | 0.09 |
| E3 | SPM2 | 6A | AX.89664583   | 6.14E+08 | 0.35 | 25.76  | 4.53 | 0.10 |
| E3 | SPM2 | 6A | AX.89372252   | 6.14E+08 | 0.33 | 28.77  | 5.39 | 0.11 |
| E3 | SPM2 | 6A | AX.89528310   | 6.11E+08 | 0.11 | -30.20 | 3.08 | 0.05 |
| E3 | SPM2 | 6A | AX.89473928   | 6.13E+08 | 0.37 | 21.56  | 3.33 | 0.07 |
| E4 | GPM2 | 6A | AX.89775895   | 1.19E+07 | 0.17 | 548.41 | 3.01 | 0.03 |
| E4 | GPM2 | 6A | AX.89399614   | 1.20E+07 | 0.18 | 606.82 | 3.80 | 0.04 |
| E4 | GPM2 | 6A | AX.89569211   | 1.20E+07 | 0.18 | 606.82 | 3.80 | 0.04 |
| E4 | GPM2 | 6A | AX.89333267   | 1.24E+07 | 0.21 | 622.87 | 4.14 | 0.03 |
| E4 | GPM2 | 6A | AX.89442264   | 1.19E+07 | 0.17 | 548.41 | 3.01 | 0.03 |
| E4 | GPM2 | 6A | AX.89342703   | 8.17E+06 | 0.21 | 526.50 | 3.03 | 0.02 |
| E4 | GPM2 | 6A | AX.89363939   | 8.17E+06 | 0.21 | 551.68 | 3.20 | 0.02 |
| E4 | GPM2 | 6A | AX.89554180   | 1.24E+07 | 0.21 | 602.14 | 3.87 | 0.03 |
| E4 | GPM2 | 6A | AX.89416807   | 1.24E+07 | 0.21 | 602.14 | 3.87 | 0.03 |
| E4 | GPM2 | 6A | AX.89513747   | 1.24E+07 | 0.20 | 544.38 | 3.18 | 0.02 |
| E4 | GPM2 | 6A | AX.89451585   | 1.24E+07 | 0.46 | 515.82 | 4.03 | 0.07 |
| E4 | GY   | 6A | AX.89767404   | 1.09E+07 | 0.45 | 1.49   | 3.10 | 0.04 |
| E4 | GY   | 6A | X.89481606_OT | 1.16E+07 | 0.45 | -1.45  | 3.01 | 0.03 |
| E4 | GPS  | 6A | AX.89650935   | 5.97E+08 | 0.25 | -1.77  | 3.11 | 0.10 |
| E4 | GPS  | 6A | AX.89776944   | 5.97E+08 | 0.26 | -1.74  | 3.21 | 0.09 |
| E4 | GPS  | 6A | AX.89664759   | 5.97E+08 | 0.27 | -1.73  | 3.25 | 0.09 |
| E4 | GPS  | 6A | AX.89429065   | 5.97E+08 | 0.26 | -1.80  | 3.38 | 0.09 |
| E4 | GPS  | 6A | AX.89713144   | 5.97E+08 | 0.26 | -1.74  | 3.21 | 0.09 |
| E4 | GPS  | 6A | AX.89626879   | 5.97E+08 | 0.26 | -1.74  | 3.21 | 0.09 |
| E4 | GPS  | 6A | AX.89684654   | 5.97E+08 | 0.27 | -1.73  | 3.25 | 0.09 |
| E4 | GPS  | 6A | AX.89720272   | 5.97E+08 | 0.27 | -1.73  | 3.25 | 0.09 |
| E4 | GPS  | 6A | AX.89462597   | 5.97E+08 | 0.27 | -1.73  | 3.25 | 0.09 |
| E4 | GPS  | 6A | AX.89578558   | 5.97E+08 | 0.26 | -1.74  | 3.21 | 0.09 |
| E4 | GPS  | 6A | AX.89469783   | 5.97E+08 | 0.27 | -1.73  | 3.25 | 0.09 |
| E4 | GPS  | 6A | AX.89313811   | 5.97E+08 | 0.26 | -1.78  | 3.39 | 0.09 |
| E4 | GPS  | 6A | AX.89540414   | 5.97E+08 | 0.27 | -1.71  | 3.12 | 0.09 |
| E4 | GPS  | 6A | AX.89558123   | 5.97E+08 | 0.27 | -1.75  | 3.27 | 0.09 |
| E4 | GPS  | 6A | AX.89416492   | 5.97E+08 | 0.26 | -1.78  | 3.39 | 0.09 |
| E4 | GPS  | 6A | AX.89454374   | 5.97E+08 | 0.27 | -1.73  | 3.25 | 0.09 |
| E4 | GPS  | 6A | AX.89712144   | 5.97E+08 | 0.27 | -1.73  | 3.25 | 0.09 |
| E4 | GPS  | 6A | AX.89508072   | 5.98E+08 | 0.27 | -1.73  | 3.25 | 0.09 |
| E4 | GPS  | 6A | AX.89776921   | 5.98E+08 | 0.27 | -1.80  | 3.47 | 0.10 |
| E4 | GPS  | 6A | AX.89685931   | 5.98E+08 | 0.26 | -1.78  | 3.39 | 0.09 |
| E4 | GPS  | 6A | AX.89562610   | 5.98E+08 | 0.25 | -1.92  | 3.65 | 0.09 |
| E4 | GY   | 6A | AX.89399614   | 1.20E+07 | 0.19 | 1.84   | 3.09 | 0.03 |
| E4 | GY   | 6A | AX.89569211   | 1.20E+07 | 0.19 | 1.84   | 3.09 | 0.03 |
| E4 | GY   | 6A | AX.89333267   | 1.24E+07 | 0.21 | 1.89   | 3.41 | 0.02 |
| E4 | GY   | 6A | AX.89554180   | 1.24E+07 | 0.21 | 1.80   | 3.09 | 0.02 |
| E4 | GY   | 6A | AX.89416807   | 1.24E+07 | 0.21 | 1.80   | 3.09 | 0.02 |

|    |      |    |               |          |      |       |      |      |
|----|------|----|---------------|----------|------|-------|------|------|
| E4 | GY   | 6A | AX.89488628   | 5.21E+08 | 0.07 | -2.81 | 3.03 | 0.04 |
| E4 | SPM2 | 6A | AX.89349891   | 1.44E+07 | 0.12 | 24.78 | 3.12 | 0.04 |
| E4 | SPM2 | 6A | AX.89751817   | 2.70E+07 | 0.26 | 19.87 | 3.50 | 0.06 |
| E4 | SPM2 | 6A | X.89603108_OT | 5.80E+08 | 0.13 | 26.20 | 3.52 | 0.06 |
| E4 | SPM2 | 6A | X.89643197_OT | 5.80E+08 | 0.12 | 25.11 | 3.18 | 0.05 |
| E4 | SPM2 | 6A | X.89571346_OT | 6.10E+08 | 0.21 | 21.86 | 3.30 | 0.09 |
| E4 | TKW  | 6A | AX.89582899   | 3.50E+07 | 0.32 | 0.93  | 3.10 | 0.00 |
| E1 | SPM2 | 6B | AX.89685941   | 6.77E+08 | 0.07 | 33.60 | 3.17 | 0.06 |
| E1 | SPM2 | 6B | AX.89656381   | 6.77E+08 | 0.06 | 34.11 | 3.07 | 0.05 |
| E1 | GY   | 6B | AX.86166228   | 6.57E+07 | 0.15 | -3.21 | 3.09 | 0.05 |
| E1 | GY   | 6B | AX.89446890   | 8.73E+07 | 0.09 | -4.50 | 3.73 | 0.06 |
| E1 | GY   | 6B | AX.89517996   | 1.29E+08 | 0.07 | -5.14 | 4.11 | 0.07 |
| E1 | GY   | 6B | AX.89350910   | 2.35E+08 | 0.16 | -3.38 | 3.51 | 0.05 |
| E1 | GY   | 6B | AX.89350910   | 2.35E+08 | 0.16 | -3.38 | 3.51 | 0.05 |
| E1 | GY   | 6B | AX.89568337   | 4.67E+08 | 0.21 | -2.84 | 3.19 | 0.05 |
| E1 | GY   | 6B | AX.89660252   | 1.29E+08 | 0.07 | -5.14 | 4.11 | 0.07 |
| E1 | SPM2 | 6B | AX.89519115   | 6.78E+08 | 0.07 | 33.60 | 3.17 | 0.06 |
| E1 | GY   | 6B | AX.89388402   | 1.25E+08 | 0.22 | -2.78 | 3.15 | 0.05 |
| E1 | GY   | 6B | AX.89421263   | 1.28E+08 | 0.07 | -5.42 | 4.28 | 0.07 |
| E1 | GY   | 6B | AX.89660252   | 1.29E+08 | 0.07 | -5.14 | 4.11 | 0.07 |
| E1 | GY   | 6B | AX.89421263   | 1.28E+08 | 0.07 | -5.42 | 4.28 | 0.07 |
| E1 | GY   | 6B | AX.89463681   | 4.65E+08 | 0.20 | -2.86 | 3.09 | 0.05 |
| E1 | GY   | 6B | AX.89613195   | 2.34E+08 | 0.16 | -3.06 | 3.02 | 0.04 |
| E1 | GY   | 6B | AX.89328519   | 4.65E+08 | 0.20 | -2.86 | 3.09 | 0.05 |
| E1 | GY   | 6B | AX.89332352   | 4.65E+08 | 0.20 | -2.86 | 3.09 | 0.05 |
| E1 | GY   | 6B | AX.89462797   | 1.29E+08 | 0.08 | -5.25 | 4.48 | 0.07 |
| E1 | GY   | 6B | AX.89496663   | 2.37E+08 | 0.16 | -3.06 | 3.02 | 0.04 |
| E1 | GY   | 6B | AX.89333381   | 6.10E+08 | 0.17 | -3.14 | 3.29 | 0.06 |
| E1 | GY   | 6B | AX.89496663   | 2.37E+08 | 0.16 | -3.06 | 3.02 | 0.04 |
| E1 | GY   | 6B | AX.89449986   | 4.67E+08 | 0.21 | -2.84 | 3.19 | 0.05 |
| E1 | GY   | 6B | AX.89530519   | 6.11E+08 | 0.18 | -3.09 | 3.26 | 0.06 |
| E1 | GY   | 6B | AX.89446890   | 8.73E+07 | 0.09 | -4.50 | 3.73 | 0.06 |
| E1 | GY   | 6B | AX.89517996   | 1.29E+08 | 0.07 | -5.14 | 4.11 | 0.07 |
| E1 | GY   | 6B | AX.86166228   | 6.57E+07 | 0.15 | -3.21 | 3.09 | 0.05 |
| E1 | GY   | 6B | AX.89532953   | 4.63E+08 | 0.20 | -2.86 | 3.09 | 0.05 |
| E1 | GY   | 6B | AX.89319508   | 1.29E+08 | 0.07 | -5.21 | 4.21 | 0.07 |
| E1 | GY   | 6B | AX.89323627   | 1.30E+08 | 0.07 | -5.52 | 4.65 | 0.08 |
| E1 | SPM2 | 6B | AX.89355439   | 6.77E+08 | 0.06 | 34.11 | 3.07 | 0.05 |
| E1 | GY   | 6B | AX.89384533   | 2.34E+08 | 0.16 | -3.06 | 3.02 | 0.04 |
| E1 | GY   | 6B | AX.89329305   | 6.11E+08 | 0.18 | -3.09 | 3.26 | 0.06 |
| E1 | GY   | 6B | AX.89477111   | 2.35E+08 | 0.16 | -3.06 | 3.02 | 0.04 |
| E1 | GY   | 6B | AX.89454965   | 6.06E+08 | 0.13 | -3.35 | 3.02 | 0.05 |
| E1 | GY   | 6B | AX.89342187   | 6.09E+08 | 0.13 | -3.35 | 3.02 | 0.05 |
| E1 | GY   | 6B | AX.89620029   | 1.29E+08 | 0.07 | -4.55 | 3.33 | 0.05 |
| E1 | GY   | 6B | AX.89312342   | 1.25E+08 | 0.22 | -2.78 | 3.15 | 0.05 |
| E1 | GY   | 6B | AX.89357544   | 4.66E+08 | 0.20 | -2.86 | 3.09 | 0.05 |
| E1 | GY   | 6B | AX.89413801   | 4.66E+08 | 0.20 | -2.86 | 3.09 | 0.05 |
| E1 | GY   | 6B | AX.89417457   | 4.66E+08 | 0.21 | -2.92 | 3.29 | 0.05 |
| E1 | GY   | 6B | AX.89388402   | 1.25E+08 | 0.22 | -2.78 | 3.15 | 0.05 |
| E1 | GY   | 6B | AX.89593764   | 6.12E+08 | 0.17 | -2.98 | 3.01 | 0.05 |

|    |      |    |             |          |      |       |      |      |
|----|------|----|-------------|----------|------|-------|------|------|
| E1 | GY   | 6B | AX.89318747 | 4.63E+08 | 0.20 | -2.86 | 3.09 | 0.05 |
| E1 | GY   | 6B | AX.89325291 | 1.28E+08 | 0.07 | -5.67 | 4.38 | 0.07 |
| E1 | GY   | 6B | AX.89402631 | 1.28E+08 | 0.07 | -5.42 | 4.28 | 0.07 |
| E1 | GY   | 6B | AX.89430381 | 2.39E+08 | 0.16 | -3.06 | 3.02 | 0.04 |
| E1 | GY   | 6B | AX.89332261 | 6.06E+08 | 0.13 | -3.35 | 3.02 | 0.05 |
| E1 | GY   | 6B | AX.89382186 | 4.62E+08 | 0.20 | -2.86 | 3.09 | 0.05 |
| E1 | SPM2 | 6B | AX.89691460 | 6.77E+08 | 0.06 | 36.11 | 3.38 | 0.06 |
| E1 | GY   | 6B | AX.89415017 | 4.64E+08 | 0.20 | -2.86 | 3.09 | 0.05 |
| E1 | GY   | 6B | AX.89745770 | 1.28E+08 | 0.07 | -5.14 | 4.11 | 0.07 |
| E1 | GY   | 6B | AX.89318747 | 4.63E+08 | 0.20 | -2.86 | 3.09 | 0.05 |
| E1 | GY   | 6B | AX.89446764 | 4.65E+08 | 0.20 | -2.86 | 3.09 | 0.05 |
| E1 | SPM2 | 6B | AX.89526757 | 6.77E+08 | 0.07 | 33.60 | 3.17 | 0.06 |
| E1 | GY   | 6B | AX.89347329 | 4.64E+08 | 0.20 | -2.86 | 3.09 | 0.05 |
| E1 | GY   | 6B | AX.89356678 | 4.63E+08 | 0.21 | -2.84 | 3.18 | 0.05 |
| E1 | GY   | 6B | AX.89356678 | 4.63E+08 | 0.21 | -2.84 | 3.18 | 0.05 |
| E1 | GY   | 6B | AX.89478059 | 4.67E+08 | 0.21 | -2.84 | 3.19 | 0.05 |
| E1 | GY   | 6B | AX.89327088 | 4.64E+08 | 0.20 | -2.86 | 3.09 | 0.05 |
| E1 | GY   | 6B | AX.89560249 | 4.27E+07 | 0.36 | -2.46 | 3.26 | 0.05 |
| E1 | GY   | 6B | AX.89402543 | 4.63E+08 | 0.20 | -2.86 | 3.09 | 0.05 |
| E1 | GY   | 6B | AX.89342187 | 6.09E+08 | 0.13 | -3.35 | 3.02 | 0.05 |
| E1 | GY   | 6B | AX.89573055 | 1.28E+08 | 0.07 | -5.42 | 4.28 | 0.07 |
| E1 | GY   | 6B | AX.89336582 | 1.28E+08 | 0.08 | -4.72 | 3.89 | 0.06 |
| E1 | GY   | 6B | AX.89430381 | 2.39E+08 | 0.16 | -3.06 | 3.02 | 0.04 |
| E1 | GY   | 6B | AX.89382186 | 4.62E+08 | 0.20 | -2.86 | 3.09 | 0.05 |
| E1 | GY   | 6B | AX.89504302 | 4.63E+08 | 0.20 | -2.86 | 3.09 | 0.05 |
| E1 | GY   | 6B | AX.89696497 | 1.30E+08 | 0.08 | -4.88 | 3.94 | 0.06 |
| E1 | GY   | 6B | AX.89539469 | 6.11E+08 | 0.17 | -3.11 | 3.23 | 0.06 |
| E1 | GY   | 6B | AX.89658859 | 6.12E+08 | 0.17 | -2.98 | 3.01 | 0.05 |
| E1 | GY   | 6B | AX.89329305 | 6.11E+08 | 0.18 | -3.09 | 3.26 | 0.06 |
| E1 | GY   | 6B | AX.89336582 | 1.28E+08 | 0.08 | -4.72 | 3.89 | 0.06 |
| E1 | GY   | 6B | AX.89328519 | 4.65E+08 | 0.20 | -2.86 | 3.09 | 0.05 |
| E1 | GY   | 6B | AX.89352558 | 1.29E+08 | 0.07 | -5.14 | 4.11 | 0.07 |
| E1 | GY   | 6B | AX.89622419 | 1.25E+08 | 0.22 | -2.78 | 3.15 | 0.05 |
| E1 | GY   | 6B | AX.89622419 | 1.25E+08 | 0.22 | -2.78 | 3.15 | 0.05 |
| E1 | GY   | 6B | AX.89463681 | 4.65E+08 | 0.20 | -2.86 | 3.09 | 0.05 |
| E1 | GY   | 6B | AX.89563872 | 1.25E+08 | 0.22 | -2.78 | 3.15 | 0.05 |
| E1 | GY   | 6B | AX.89327088 | 4.64E+08 | 0.20 | -2.86 | 3.09 | 0.05 |
| E1 | GY   | 6B | AX.89409254 | 2.35E+08 | 0.16 | -3.06 | 3.02 | 0.04 |
| E1 | GY   | 6B | AX.89424161 | 1.29E+08 | 0.08 | -5.25 | 4.48 | 0.07 |
| E1 | SPM2 | 6B | AX.89384275 | 6.78E+08 | 0.06 | 34.11 | 3.07 | 0.05 |
| E1 | GY   | 6B | AX.89495282 | 4.66E+08 | 0.21 | -2.84 | 3.19 | 0.05 |
| E1 | GY   | 6B | AX.89759921 | 8.60E+07 | 0.10 | -3.95 | 3.23 | 0.05 |
| E1 | GY   | 6B | AX.89365639 | 6.41E+08 | 0.05 | -5.88 | 3.55 | 0.07 |
| E1 | GY   | 6B | AX.89438340 | 6.42E+08 | 0.05 | -5.88 | 3.55 | 0.07 |
| E1 | GY   | 6B | AX.89395311 | 2.35E+08 | 0.16 | -3.06 | 3.02 | 0.04 |
| E1 | GY   | 6B | AX.89543445 | 4.65E+08 | 0.20 | -2.86 | 3.09 | 0.05 |
| E1 | SPM2 | 6B | AX.89567570 | 6.78E+08 | 0.07 | 33.60 | 3.17 | 0.06 |
| E1 | GY   | 6B | AX.89532953 | 4.63E+08 | 0.20 | -2.86 | 3.09 | 0.05 |
| E1 | GY   | 6B | AX.89510891 | 4.62E+08 | 0.20 | -2.86 | 3.09 | 0.05 |
| E1 | GY   | 6B | AX.89568337 | 4.67E+08 | 0.21 | -2.84 | 3.19 | 0.05 |

|    |      |    |             |          |      |       |      |      |
|----|------|----|-------------|----------|------|-------|------|------|
| E1 | GY   | 6B | AX.89437168 | 1.29E+08 | 0.07 | -5.14 | 4.11 | 0.07 |
| E1 | GY   | 6B | AX.89475763 | 1.27E+08 | 0.07 | -5.42 | 4.28 | 0.07 |
| E1 | GY   | 6B | AX.89593764 | 6.12E+08 | 0.17 | -2.98 | 3.01 | 0.05 |
| E1 | SPM2 | 6B | AX.89491484 | 6.77E+08 | 0.06 | 36.11 | 3.38 | 0.06 |
| E1 | GY   | 6B | AX.89535702 | 1.29E+08 | 0.07 | -5.14 | 4.11 | 0.07 |
| E1 | SPM2 | 6B | AX.89608992 | 6.78E+08 | 0.06 | 34.11 | 3.07 | 0.05 |
| E1 | GY   | 6B | AX.89630292 | 6.12E+08 | 0.17 | -2.98 | 3.01 | 0.05 |
| E1 | GY   | 6B | AX.89477111 | 2.35E+08 | 0.16 | -3.06 | 3.02 | 0.04 |
| E1 | GY   | 6B | AX.89419906 | 1.30E+08 | 0.07 | -5.52 | 4.65 | 0.08 |
| E1 | GY   | 6B | AX.89559915 | 6.11E+08 | 0.18 | -3.09 | 3.26 | 0.06 |
| E1 | GY   | 6B | AX.89454965 | 6.06E+08 | 0.13 | -3.35 | 3.02 | 0.05 |
| E1 | GY   | 6B | AX.89488095 | 1.30E+08 | 0.07 | -5.52 | 4.65 | 0.08 |
| E1 | GY   | 6B | AX.89334641 | 4.63E+08 | 0.20 | -2.86 | 3.09 | 0.05 |
| E1 | GY   | 6B | AX.89437168 | 1.29E+08 | 0.07 | -5.14 | 4.11 | 0.07 |
| E1 | GY   | 6B | AX.89669783 | 1.28E+08 | 0.07 | -4.78 | 3.26 | 0.05 |
| E1 | GY   | 6B | AX.89398647 | 4.65E+08 | 0.20 | -2.86 | 3.09 | 0.05 |
| E1 | GY   | 6B | AX.89463363 | 1.29E+08 | 0.07 | -5.52 | 4.65 | 0.08 |
| E1 | GY   | 6B | AX.89493127 | 1.30E+08 | 0.07 | -5.52 | 4.65 | 0.08 |
| E1 | SPM2 | 6B | AX.89421537 | 6.77E+08 | 0.07 | 33.60 | 3.17 | 0.06 |
| E1 | GY   | 6B | AX.89570602 | 4.67E+08 | 0.21 | -2.96 | 3.43 | 0.05 |
| E1 | GY   | 6B | AX.89446764 | 4.65E+08 | 0.20 | -2.86 | 3.09 | 0.05 |
| E1 | SPM2 | 6B | AX.89535590 | 6.77E+08 | 0.07 | 33.60 | 3.17 | 0.06 |
| E1 | GY   | 6B | AX.89587336 | 1.29E+08 | 0.08 | -5.25 | 4.48 | 0.07 |
| E1 | GY   | 6B | AX.89491312 | 4.63E+08 | 0.20 | -2.86 | 3.09 | 0.05 |
| E1 | GY   | 6B | AX.89620029 | 1.29E+08 | 0.07 | -4.55 | 3.33 | 0.05 |
| E1 | GY   | 6B | AX.89710819 | 4.66E+08 | 0.21 | -2.84 | 3.19 | 0.05 |
| E1 | GY   | 6B | AX.89612588 | 2.35E+08 | 0.16 | -3.06 | 3.02 | 0.04 |
| E1 | GY   | 6B | AX.89757356 | 4.27E+07 | 0.35 | -2.70 | 3.82 | 0.06 |
| E1 | GY   | 6B | AX.89616707 | 4.66E+08 | 0.20 | -3.12 | 3.54 | 0.05 |
| E1 | GY   | 6B | AX.89572587 | 1.27E+08 | 0.07 | -5.14 | 4.11 | 0.07 |
| E1 | GY   | 6B | AX.89471542 | 2.35E+08 | 0.16 | -3.06 | 3.02 | 0.04 |
| E1 | GY   | 6B | AX.89699001 | 4.63E+08 | 0.20 | -2.86 | 3.09 | 0.05 |
| E1 | GY   | 6B | AX.89320931 | 2.27E+08 | 0.16 | -3.06 | 3.02 | 0.04 |
| E1 | GY   | 6B | AX.89354586 | 2.35E+08 | 0.16 | -3.06 | 3.02 | 0.04 |
| E1 | GY   | 6B | AX.89402543 | 4.63E+08 | 0.20 | -2.86 | 3.09 | 0.05 |
| E1 | SPM2 | 6B | AX.89414164 | 6.78E+08 | 0.07 | 33.60 | 3.17 | 0.06 |
| E1 | GY   | 6B | AX.89735832 | 8.02E+07 | 0.09 | -4.32 | 3.63 | 0.06 |
| E1 | GY   | 6B | AX.89707549 | 1.28E+08 | 0.07 | -5.14 | 4.11 | 0.07 |
| E1 | GY   | 6B | AX.89602743 | 4.46E+08 | 0.18 | -3.11 | 3.36 | 0.05 |
| E1 | GY   | 6B | AX.89602743 | 4.46E+08 | 0.18 | -3.11 | 3.36 | 0.05 |
| E1 | GY   | 6B | AX.89449986 | 4.67E+08 | 0.21 | -2.84 | 3.19 | 0.05 |
| E1 | GY   | 6B | AX.89415017 | 4.64E+08 | 0.20 | -2.86 | 3.09 | 0.05 |
| E1 | GY   | 6B | AX.89426492 | 6.06E+08 | 0.13 | -3.35 | 3.02 | 0.05 |
| E1 | GY   | 6B | AX.89438340 | 6.42E+08 | 0.05 | -5.88 | 3.55 | 0.07 |
| E1 | GY   | 6B | AX.89626004 | 1.29E+08 | 0.07 | -5.58 | 4.26 | 0.07 |
| E1 | GY   | 6B | AX.89435189 | 6.06E+08 | 0.13 | -3.35 | 3.02 | 0.05 |
| E1 | GY   | 6B | AX.89310882 | 4.63E+08 | 0.20 | -2.86 | 3.09 | 0.05 |
| E1 | GY   | 6B | AX.89333381 | 6.10E+08 | 0.17 | -3.14 | 3.29 | 0.06 |
| E1 | GY   | 6B | AX.89521559 | 1.29E+08 | 0.07 | -5.14 | 4.11 | 0.07 |
| E1 | GY   | 6B | AX.89323225 | 1.29E+08 | 0.08 | -5.25 | 4.48 | 0.07 |

|    |      |    |             |          |      |       |      |      |
|----|------|----|-------------|----------|------|-------|------|------|
| E1 | GY   | 6B | AX.89323627 | 1.30E+08 | 0.07 | -5.52 | 4.65 | 0.08 |
| E1 | GY   | 6B | AX.89745770 | 1.28E+08 | 0.07 | -5.14 | 4.11 | 0.07 |
| E1 | GY   | 6B | AX.89592228 | 4.65E+08 | 0.20 | -2.86 | 3.09 | 0.05 |
| E1 | SPM2 | 6B | AX.89455042 | 6.77E+08 | 0.07 | 33.60 | 3.17 | 0.06 |
| E1 | GY   | 6B | AX.89762764 | 1.27E+08 | 0.07 | -5.14 | 4.11 | 0.07 |
| E1 | GY   | 6B | AX.89541349 | 7.97E+07 | 0.09 | -4.18 | 3.29 | 0.05 |
| E1 | GY   | 6B | AX.89470738 | 2.27E+08 | 0.16 | -3.06 | 3.02 | 0.04 |
| E1 | GY   | 6B | AX.89579714 | 1.18E+08 | 0.21 | -2.84 | 3.19 | 0.05 |
| E1 | GY   | 6B | AX.89545159 | 4.64E+08 | 0.20 | -2.86 | 3.09 | 0.05 |
| E1 | GY   | 6B | AX.89776452 | 6.93E+08 | 0.23 | -2.71 | 3.05 | 0.04 |
| E1 | SPM2 | 6B | AX.89520056 | 6.78E+08 | 0.06 | 34.11 | 3.07 | 0.05 |
| E1 | GY   | 6B | AX.89452242 | 2.37E+08 | 0.16 | -3.06 | 3.02 | 0.04 |
| E1 | GY   | 6B | AX.89699001 | 4.63E+08 | 0.20 | -2.86 | 3.09 | 0.05 |
| E1 | GY   | 6B | AX.89475763 | 1.27E+08 | 0.07 | -5.42 | 4.28 | 0.07 |
| E1 | SPM2 | 6B | AX.89706708 | 6.77E+08 | 0.07 | 33.60 | 3.17 | 0.06 |
| E1 | GY   | 6B | AX.89768419 | 1.28E+08 | 0.07 | -5.42 | 4.28 | 0.07 |
| E1 | GY   | 6B | AX.89628919 | 1.27E+08 | 0.07 | -5.42 | 4.28 | 0.07 |
| E1 | GY   | 6B | AX.89628919 | 1.27E+08 | 0.07 | -5.42 | 4.28 | 0.07 |
| E1 | GY   | 6B | AX.89488073 | 1.26E+07 | 0.40 | -2.71 | 4.01 | 0.07 |
| E1 | GY   | 6B | AX.89347329 | 4.64E+08 | 0.20 | -2.86 | 3.09 | 0.05 |
| E1 | GY   | 6B | AX.89703732 | 1.29E+08 | 0.08 | -5.25 | 4.48 | 0.07 |
| E1 | SPM2 | 6B | AX.89377951 | 6.78E+08 | 0.07 | 33.60 | 3.17 | 0.06 |
| E1 | SPM2 | 6B | AX.89714461 | 6.78E+08 | 0.07 | 33.60 | 3.17 | 0.06 |
| E1 | GY   | 6B | AX.89497770 | 4.65E+08 | 0.20 | -2.86 | 3.09 | 0.05 |
| E1 | GY   | 6B | AX.89497770 | 4.65E+08 | 0.20 | -2.86 | 3.09 | 0.05 |
| E1 | GY   | 6B | AX.89626004 | 1.29E+08 | 0.07 | -5.58 | 4.26 | 0.07 |
| E1 | GY   | 6B | AX.89547076 | 1.29E+08 | 0.07 | -5.14 | 4.11 | 0.07 |
| E1 | GY   | 6B | AX.89680406 | 1.25E+08 | 0.22 | -2.78 | 3.15 | 0.05 |
| E1 | GY   | 6B | AX.89384533 | 2.34E+08 | 0.16 | -3.06 | 3.02 | 0.04 |
| E1 | GY   | 6B | AX.89560190 | 1.29E+08 | 0.08 | -4.72 | 3.90 | 0.06 |
| E1 | GY   | 6B | AX.89556137 | 4.26E+07 | 0.31 | -2.78 | 3.76 | 0.06 |
| E1 | GY   | 6B | AX.89491312 | 4.63E+08 | 0.20 | -2.86 | 3.09 | 0.05 |
| E1 | GY   | 6B | AX.89730316 | 1.30E+08 | 0.08 | -5.25 | 4.48 | 0.07 |
| E1 | GY   | 6B | AX.89545203 | 1.29E+08 | 0.07 | -5.14 | 4.11 | 0.07 |
| E1 | GY   | 6B | AX.89374488 | 2.35E+08 | 0.16 | -3.38 | 3.51 | 0.05 |
| E1 | GY   | 6B | AX.89740128 | 6.41E+08 | 0.05 | -5.88 | 3.55 | 0.07 |
| E1 | GY   | 6B | AX.89328387 | 1.28E+08 | 0.07 | -5.42 | 4.28 | 0.07 |
| E1 | SPM2 | 6B | AX.89487015 | 6.77E+08 | 0.07 | 33.60 | 3.17 | 0.06 |
| E1 | GY   | 6B | AX.89422288 | 4.63E+08 | 0.20 | -2.86 | 3.09 | 0.05 |
| E1 | GY   | 6B | AX.89422288 | 4.63E+08 | 0.20 | -2.86 | 3.09 | 0.05 |
| E1 | GY   | 6B | AX.89744302 | 1.29E+08 | 0.07 | -5.14 | 4.11 | 0.07 |
| E1 | GY   | 6B | AX.89517207 | 2.36E+08 | 0.16 | -3.16 | 3.14 | 0.05 |
| E1 | GY   | 6B | AX.89539469 | 6.11E+08 | 0.17 | -3.11 | 3.23 | 0.06 |
| E1 | GY   | 6B | AX.89434922 | 4.64E+08 | 0.20 | -2.86 | 3.09 | 0.05 |
| E1 | GY   | 6B | AX.89658859 | 6.12E+08 | 0.17 | -2.98 | 3.01 | 0.05 |
| E1 | GY   | 6B | AX.89435189 | 6.06E+08 | 0.13 | -3.35 | 3.02 | 0.05 |
| E1 | GY   | 6B | AX.89683690 | 4.65E+08 | 0.20 | -2.86 | 3.09 | 0.05 |
| E1 | GY   | 6B | AX.89587336 | 1.29E+08 | 0.08 | -5.25 | 4.48 | 0.07 |
| E1 | GY   | 6B | AX.89435693 | 4.63E+08 | 0.20 | -2.86 | 3.09 | 0.05 |
| E1 | GY   | 6B | AX.89435693 | 4.63E+08 | 0.20 | -2.86 | 3.09 | 0.05 |



|    |      |    |             |          |      |       |      |      |
|----|------|----|-------------|----------|------|-------|------|------|
| E1 | GY   | 6B | AX.89563872 | 1.25E+08 | 0.22 | -2.78 | 3.15 | 0.05 |
| E1 | GY   | 6B | AX.89319508 | 1.29E+08 | 0.07 | -5.21 | 4.21 | 0.07 |
| E1 | GY   | 6B | AX.89518322 | 1.29E+08 | 0.08 | -4.96 | 4.06 | 0.06 |
| E1 | GY   | 6B | AX.89724500 | 4.65E+08 | 0.20 | -2.86 | 3.09 | 0.05 |
| E1 | GY   | 6B | AX.89409254 | 2.35E+08 | 0.16 | -3.06 | 3.02 | 0.04 |
| E1 | GY   | 6B | AX.89518587 | 1.30E+08 | 0.07 | -5.52 | 4.65 | 0.08 |
| E1 | GY   | 6B | AX.89560383 | 4.26E+07 | 0.35 | -2.53 | 3.40 | 0.05 |
| E1 | GY   | 6B | AX.89698227 | 4.64E+08 | 0.20 | -2.86 | 3.09 | 0.05 |
| E1 | GY   | 6B | AX.89413801 | 4.66E+08 | 0.20 | -2.86 | 3.09 | 0.05 |
| E1 | GY   | 6B | AX.89735832 | 8.02E+07 | 0.09 | -4.32 | 3.63 | 0.06 |
| E1 | GY   | 6B | AX.89747766 | 6.10E+08 | 0.16 | -3.24 | 3.35 | 0.06 |
| E1 | GY   | 6B | AX.89402631 | 1.28E+08 | 0.07 | -5.42 | 4.28 | 0.07 |
| E1 | GY   | 6B | AX.89520699 | 2.33E+08 | 0.16 | -3.06 | 3.02 | 0.04 |
| E1 | GY   | 6B | AX.89520699 | 2.33E+08 | 0.16 | -3.06 | 3.02 | 0.04 |
| E1 | GY   | 6B | AX.89589396 | 1.27E+08 | 0.07 | -5.14 | 4.11 | 0.07 |
| E1 | GY   | 6B | AX.89555450 | 2.27E+08 | 0.16 | -3.06 | 3.02 | 0.04 |
| E1 | GY   | 6B | AX.89592228 | 4.65E+08 | 0.20 | -2.86 | 3.09 | 0.05 |
| E1 | GY   | 6B | AX.89556137 | 4.26E+07 | 0.31 | -2.78 | 3.76 | 0.06 |
| E1 | GY   | 6B | AX.89541349 | 7.97E+07 | 0.09 | -4.18 | 3.29 | 0.05 |
| E1 | SPM2 | 6B | AX.89333474 | 6.78E+08 | 0.07 | 33.60 | 3.17 | 0.06 |
| E1 | GY   | 6B | AX.89612774 | 1.29E+08 | 0.08 | -5.25 | 4.48 | 0.07 |
| E1 | GY   | 6B | AX.89545159 | 4.64E+08 | 0.20 | -2.86 | 3.09 | 0.05 |
| E1 | GY   | 6B | AX.89370211 | 4.28E+07 | 0.36 | -2.64 | 3.70 | 0.05 |
| E1 | GY   | 6B | AX.89393465 | 4.63E+08 | 0.20 | -2.86 | 3.09 | 0.05 |
| E1 | GY   | 6B | AX.89393465 | 4.63E+08 | 0.20 | -2.86 | 3.09 | 0.05 |
| E1 | GY   | 6B | AX.89417457 | 4.66E+08 | 0.21 | -2.92 | 3.29 | 0.05 |
| E1 | GY   | 6B | AX.89767544 | 4.26E+07 | 0.36 | -2.52 | 3.39 | 0.05 |
| E1 | GY   | 6B | AX.89452242 | 2.37E+08 | 0.16 | -3.06 | 3.02 | 0.04 |
| E1 | GY   | 6B | AX.89325291 | 1.28E+08 | 0.07 | -5.67 | 4.38 | 0.07 |
| E1 | GY   | 6B | AX.89347083 | 4.27E+07 | 0.31 | -2.74 | 3.71 | 0.05 |
| E1 | GY   | 6B | AX.89347083 | 4.27E+07 | 0.31 | -2.74 | 3.71 | 0.05 |
| E1 | GY   | 6B | AX.89359724 | 6.05E+08 | 0.13 | -3.35 | 3.02 | 0.05 |
| E1 | GY   | 6B | AX.89359724 | 6.05E+08 | 0.13 | -3.35 | 3.02 | 0.05 |
| E1 | GY   | 6B | AX.89765140 | 4.65E+08 | 0.20 | -2.86 | 3.09 | 0.05 |
| E1 | GY   | 6B | AX.89395311 | 2.35E+08 | 0.16 | -3.06 | 3.02 | 0.04 |
| E1 | GY   | 6B | AX.89419965 | 6.42E+08 | 0.05 | -5.88 | 3.55 | 0.07 |
| E1 | GY   | 6B | AX.89717947 | 4.65E+08 | 0.20 | -2.86 | 3.09 | 0.05 |
| E1 | GY   | 6B | AX.89571598 | 6.10E+08 | 0.18 | -3.09 | 3.26 | 0.06 |
| E1 | GY   | 6B | AX.89571598 | 6.10E+08 | 0.18 | -3.09 | 3.26 | 0.06 |
| E1 | GY   | 6B | AX.89510891 | 4.62E+08 | 0.20 | -2.86 | 3.09 | 0.05 |
| E1 | GY   | 6B | AX.89608575 | 1.29E+08 | 0.07 | -5.52 | 4.65 | 0.08 |
| E1 | GY   | 6B | AX.89753643 | 4.65E+08 | 0.20 | -2.86 | 3.09 | 0.05 |
| E1 | GY   | 6B | AX.89409984 | 4.63E+08 | 0.20 | -2.86 | 3.06 | 0.04 |
| E1 | GY   | 6B | AX.89409984 | 4.63E+08 | 0.20 | -2.86 | 3.06 | 0.04 |
| E1 | GY   | 6B | AX.89669478 | 2.35E+08 | 0.16 | -3.06 | 3.02 | 0.04 |
| E1 | GY   | 6B | AX.89669478 | 2.35E+08 | 0.16 | -3.06 | 3.02 | 0.04 |
| E1 | GY   | 6B | AX.89398647 | 4.65E+08 | 0.20 | -2.86 | 3.09 | 0.05 |
| E1 | GY   | 6B | AX.89328387 | 1.28E+08 | 0.07 | -5.42 | 4.28 | 0.07 |
| E1 | GY   | 6B | AX.89707549 | 1.28E+08 | 0.07 | -5.14 | 4.11 | 0.07 |
| E1 | GY   | 6B | AX.89645517 | 2.27E+08 | 0.16 | -3.06 | 3.02 | 0.04 |

|    |      |    |             |          |      |       |      |      |
|----|------|----|-------------|----------|------|-------|------|------|
| E1 | GY   | 6B | AX.89696497 | 1.30E+08 | 0.08 | -4.88 | 3.94 | 0.06 |
| E1 | GY   | 6B | AX.89570602 | 4.67E+08 | 0.21 | -2.96 | 3.43 | 0.05 |
| E1 | SPM2 | 6B | AX.89406711 | 6.77E+08 | 0.07 | 33.60 | 3.17 | 0.06 |
| E1 | GY   | 6B | AX.89708689 | 2.37E+08 | 0.16 | -3.06 | 3.02 | 0.04 |
| E1 | GY   | 6B | AX.89708689 | 2.37E+08 | 0.16 | -3.06 | 3.02 | 0.04 |
| E1 | GY   | 6B | AX.89540091 | 1.29E+08 | 0.07 | -5.52 | 4.65 | 0.08 |
| E1 | GY   | 6B | AX.89635486 | 4.65E+08 | 0.20 | -2.86 | 3.09 | 0.05 |
| E1 | GY   | 6B | AX.89541016 | 4.65E+08 | 0.20 | -2.86 | 3.09 | 0.05 |
| E1 | GY   | 6B | AX.89424161 | 1.29E+08 | 0.08 | -5.25 | 4.48 | 0.07 |
| E1 | GY   | 6B | AX.89575719 | 1.29E+08 | 0.07 | -5.14 | 4.11 | 0.07 |
| E1 | GY   | 6B | AX.89530519 | 6.11E+08 | 0.18 | -3.09 | 3.26 | 0.06 |
| E1 | GY   | 6B | AX.89552916 | 4.65E+08 | 0.20 | -2.86 | 3.09 | 0.05 |
| E1 | GY   | 6B | AX.89552916 | 4.65E+08 | 0.20 | -2.86 | 3.09 | 0.05 |
| E1 | SPM2 | 6B | AX.89390819 | 6.78E+08 | 0.06 | 36.11 | 3.38 | 0.06 |
| E1 | GY   | 6B | AX.89495282 | 4.66E+08 | 0.21 | -2.84 | 3.19 | 0.05 |
| E1 | GY   | 6B | AX.89402250 | 2.27E+08 | 0.16 | -3.06 | 3.02 | 0.04 |
| E1 | GY   | 6B | AX.89402250 | 2.27E+08 | 0.16 | -3.06 | 3.02 | 0.04 |
| E1 | GY   | 6B | AX.89747277 | 1.25E+08 | 0.22 | -2.80 | 3.17 | 0.05 |
| E1 | GY   | 6B | AX.89759921 | 8.60E+07 | 0.10 | -3.95 | 3.23 | 0.05 |
| E1 | GY   | 6B | AX.89332261 | 6.06E+08 | 0.13 | -3.35 | 3.02 | 0.05 |
| E1 | GY   | 6B | AX.89332352 | 4.65E+08 | 0.20 | -2.86 | 3.09 | 0.05 |
| E1 | GY   | 6B | AX.89688061 | 4.65E+08 | 0.20 | -2.86 | 3.09 | 0.05 |
| E1 | GY   | 6B | AX.89688061 | 4.65E+08 | 0.20 | -2.86 | 3.09 | 0.05 |
| E1 | GY   | 6B | AX.89652368 | 4.28E+07 | 0.31 | -2.78 | 3.76 | 0.06 |
| E1 | GY   | 6B | AX.89544312 | 1.29E+08 | 0.07 | -5.52 | 4.65 | 0.08 |
| E1 | GY   | 6B | AX.89762764 | 1.27E+08 | 0.07 | -5.14 | 4.11 | 0.07 |
| E1 | GY   | 6B | AX.89776452 | 6.93E+08 | 0.23 | -2.71 | 3.05 | 0.04 |
| E1 | GY   | 6B | AX.89430017 | 1.25E+08 | 0.22 | -2.77 | 3.10 | 0.05 |
| E1 | GY   | 6B | AX.89488073 | 1.26E+07 | 0.40 | -2.71 | 4.01 | 0.07 |
| E1 | GY   | 6B | AX.89547076 | 1.29E+08 | 0.07 | -5.14 | 4.11 | 0.07 |
| E1 | GY   | 6B | AX.89326589 | 1.30E+08 | 0.08 | -5.25 | 4.48 | 0.07 |
| E1 | GY   | 6B | AX.89582883 | 4.66E+08 | 0.21 | -2.84 | 3.19 | 0.05 |
| E1 | GY   | 6B | AX.89757356 | 4.27E+07 | 0.35 | -2.70 | 3.82 | 0.06 |
| E1 | GY   | 6B | AX.89665712 | 4.26E+07 | 0.35 | -2.53 | 3.40 | 0.05 |
| E1 | GY   | 6B | AX.89694977 | 2.35E+08 | 0.16 | -3.06 | 3.02 | 0.04 |
| E1 | GY   | 6B | AX.89669783 | 1.28E+08 | 0.07 | -4.78 | 3.26 | 0.05 |
| E1 | GY   | 6B | AX.89597949 | 1.29E+08 | 0.07 | -5.52 | 4.65 | 0.08 |
| E1 | GY   | 6B | AX.89633298 | 4.27E+07 | 0.36 | -2.46 | 3.26 | 0.05 |
| E1 | GY   | 6B | AX.89504302 | 4.63E+08 | 0.20 | -2.86 | 3.09 | 0.05 |
| E1 | GY   | 6B | AX.89709192 | 1.28E+08 | 0.06 | -5.09 | 3.42 | 0.05 |
| E1 | GY   | 6B | AX.89678904 | 1.29E+08 | 0.08 | -5.25 | 4.48 | 0.07 |
| E1 | GY   | 6B | AX.89517207 | 2.36E+08 | 0.16 | -3.16 | 3.14 | 0.05 |
| E1 | GY   | 6B | AX.89646939 | 1.28E+08 | 0.07 | -5.42 | 4.28 | 0.07 |
| E1 | GY   | 6B | AX.89469421 | 4.63E+08 | 0.20 | -2.85 | 3.03 | 0.04 |
| E1 | GY   | 6B | AX.89469421 | 4.63E+08 | 0.20 | -2.85 | 3.03 | 0.04 |
| E1 | GY   | 6B | AX.89518322 | 1.29E+08 | 0.08 | -4.96 | 4.06 | 0.06 |
| E1 | GY   | 6B | AX.89724500 | 4.65E+08 | 0.20 | -2.86 | 3.09 | 0.05 |
| E1 | GY   | 6B | AX.89506640 | 2.39E+08 | 0.16 | -3.06 | 3.02 | 0.04 |
| E1 | GY   | 6B | AX.89506640 | 2.39E+08 | 0.16 | -3.06 | 3.02 | 0.04 |
| E1 | GY   | 6B | AX.89710819 | 4.66E+08 | 0.21 | -2.84 | 3.19 | 0.05 |

|    |      |    |             |          |      |       |      |      |
|----|------|----|-------------|----------|------|-------|------|------|
| E1 | GY   | 6B | AX.89475640 | 1.28E+08 | 0.07 | -5.14 | 4.11 | 0.07 |
| E1 | GY   | 6B | AX.89475640 | 1.28E+08 | 0.07 | -5.14 | 4.11 | 0.07 |
| E1 | GY   | 6B | AX.89613195 | 2.34E+08 | 0.16 | -3.06 | 3.02 | 0.04 |
| E1 | GY   | 6B | AX.89508204 | 4.63E+08 | 0.20 | -2.86 | 3.09 | 0.05 |
| E1 | GY   | 6B | AX.89310882 | 4.63E+08 | 0.20 | -2.86 | 3.09 | 0.05 |
| E1 | GY   | 6B | AX.89521559 | 1.29E+08 | 0.07 | -5.14 | 4.11 | 0.07 |
| E1 | GY   | 6B | AX.89765957 | 1.25E+08 | 0.22 | -2.78 | 3.15 | 0.05 |
| E1 | GY   | 6B | AX.89765957 | 1.25E+08 | 0.22 | -2.78 | 3.15 | 0.05 |
| E1 | GY   | 6B | AX.89555450 | 2.27E+08 | 0.16 | -3.06 | 3.02 | 0.04 |
| E1 | SPM2 | 6B | AX.89605371 | 6.77E+08 | 0.06 | 36.11 | 3.38 | 0.06 |
| E1 | GY   | 6B | AX.89521985 | 4.66E+08 | 0.21 | -2.84 | 3.19 | 0.05 |
| E1 | GY   | 6B | AX.89697805 | 1.30E+08 | 0.08 | -5.25 | 4.48 | 0.07 |
| E1 | GY   | 6B | AX.89697805 | 1.30E+08 | 0.08 | -5.25 | 4.48 | 0.07 |
| E1 | GY   | 6B | AX.89345848 | 1.29E+08 | 0.07 | -5.14 | 4.11 | 0.07 |
| E1 | GY   | 6B | AX.89763125 | 4.66E+08 | 0.20 | -2.86 | 3.09 | 0.05 |
| E1 | GY   | 6B | AX.89488095 | 1.30E+08 | 0.07 | -5.52 | 4.65 | 0.08 |
| E1 | GY   | 6B | AX.89541623 | 2.38E+08 | 0.16 | -3.06 | 3.02 | 0.04 |
| E1 | GY   | 6B | AX.89334641 | 4.63E+08 | 0.20 | -2.86 | 3.09 | 0.05 |
| E1 | GY   | 6B | AX.89495986 | 4.66E+08 | 0.21 | -2.84 | 3.19 | 0.05 |
| E1 | GY   | 6B | AX.89680666 | 4.65E+08 | 0.20 | -2.86 | 3.09 | 0.05 |
| E1 | GY   | 6B | AX.89546236 | 1.29E+08 | 0.07 | -5.14 | 4.11 | 0.07 |
| E1 | GY   | 6B | AX.89629774 | 4.63E+08 | 0.20 | -2.88 | 3.09 | 0.05 |
| E1 | GY   | 6B | AX.89629774 | 4.63E+08 | 0.20 | -2.88 | 3.09 | 0.05 |
| E1 | GY   | 6B | AX.89765140 | 4.65E+08 | 0.20 | -2.86 | 3.09 | 0.05 |
| E1 | GY   | 6B | AX.89476655 | 1.29E+08 | 0.07 | -5.14 | 4.11 | 0.07 |
| E1 | GY   | 6B | AX.89476655 | 1.29E+08 | 0.07 | -5.14 | 4.11 | 0.07 |
| E1 | GY   | 6B | AX.89709910 | 4.66E+08 | 0.21 | -2.84 | 3.19 | 0.05 |
| E1 | GY   | 6B | AX.89630292 | 6.12E+08 | 0.17 | -2.98 | 3.01 | 0.05 |
| E1 | GY   | 6B | AX.89419906 | 1.30E+08 | 0.07 | -5.52 | 4.65 | 0.08 |
| E1 | GY   | 6B | AX.89478059 | 4.67E+08 | 0.21 | -2.84 | 3.19 | 0.05 |
| E1 | GY   | 6B | AX.89559915 | 6.11E+08 | 0.18 | -3.09 | 3.26 | 0.06 |
| E1 | GY   | 6B | AX.89717947 | 4.65E+08 | 0.20 | -2.86 | 3.09 | 0.05 |
| E1 | GY   | 6B | AX.89560190 | 1.29E+08 | 0.08 | -4.72 | 3.90 | 0.06 |
| E1 | GY   | 6B | AX.89560249 | 4.27E+07 | 0.36 | -2.46 | 3.26 | 0.05 |
| E1 | GY   | 6B | AX.89730316 | 1.30E+08 | 0.08 | -5.25 | 4.48 | 0.07 |
| E1 | GY   | 6B | AX.89709076 | 2.27E+08 | 0.16 | -3.06 | 3.02 | 0.04 |
| E1 | GY   | 6B | AX.89709076 | 2.27E+08 | 0.16 | -3.06 | 3.02 | 0.04 |
| E1 | GY   | 6B | AX.89665712 | 4.26E+07 | 0.35 | -2.53 | 3.40 | 0.05 |
| E1 | SPM2 | 6B | AX.89572067 | 6.77E+08 | 0.06 | 34.11 | 3.07 | 0.05 |
| E1 | GY   | 6B | AX.89597949 | 1.29E+08 | 0.07 | -5.52 | 4.65 | 0.08 |
| E1 | GY   | 6B | AX.89678904 | 1.29E+08 | 0.08 | -5.25 | 4.48 | 0.07 |
| E1 | GY   | 6B | AX.89583493 | 4.65E+08 | 0.20 | -2.86 | 3.09 | 0.05 |
| E1 | GY   | 6B | AX.89644949 | 2.35E+08 | 0.16 | -3.06 | 3.02 | 0.04 |
| E1 | GY   | 6B | AX.89708341 | 1.28E+08 | 0.07 | -5.42 | 4.28 | 0.07 |
| E1 | GY   | 6B | AX.89352327 | 1.27E+08 | 0.07 | -5.42 | 4.28 | 0.07 |
| E1 | GY   | 6B | AX.89497224 | 4.63E+08 | 0.20 | -2.86 | 3.09 | 0.05 |
| E1 | GY   | 6B | AX.89646939 | 1.28E+08 | 0.07 | -5.42 | 4.28 | 0.07 |
| E1 | GY   | 6B | AX.89647084 | 6.42E+08 | 0.05 | -5.88 | 3.55 | 0.07 |
| E1 | GY   | 6B | AX.89647084 | 6.42E+08 | 0.05 | -5.88 | 3.55 | 0.07 |
| E1 | GY   | 6B | AX.89670568 | 4.66E+08 | 0.21 | -2.84 | 3.19 | 0.05 |

|    |      |    |             |          |      |          |      |      |
|----|------|----|-------------|----------|------|----------|------|------|
| E1 | GY   | 6B | AX.89670568 | 4.66E+08 | 0.21 | -2.84    | 3.19 | 0.05 |
| E1 | GY   | 6B | AX.89460102 | 4.63E+08 | 0.20 | -2.86    | 3.09 | 0.05 |
| E1 | GY   | 6B | AX.89460102 | 4.63E+08 | 0.20 | -2.86    | 3.09 | 0.05 |
| E1 | GY   | 6B | AX.89518587 | 1.30E+08 | 0.07 | -5.52    | 4.65 | 0.08 |
| E1 | GY   | 6B | AX.89470738 | 2.27E+08 | 0.16 | -3.06    | 3.02 | 0.04 |
| E1 | GY   | 6B | AX.89698227 | 4.64E+08 | 0.20 | -2.86    | 3.09 | 0.05 |
| E1 | GY   | 6B | AX.89744520 | 4.63E+08 | 0.20 | -2.86    | 3.09 | 0.05 |
| E1 | GY   | 6B | AX.89744520 | 4.63E+08 | 0.20 | -2.86    | 3.09 | 0.05 |
| E1 | GY   | 6B | AX.89543948 | 1.27E+08 | 0.07 | -5.14    | 4.11 | 0.07 |
| E1 | GY   | 6B | AX.89543948 | 1.27E+08 | 0.07 | -5.14    | 4.11 | 0.07 |
| E1 | GY   | 6B | AX.89647703 | 1.29E+08 | 0.07 | -5.52    | 4.65 | 0.08 |
| E1 | GY   | 6B | AX.89647703 | 1.29E+08 | 0.07 | -5.52    | 4.65 | 0.08 |
| E1 | GY   | 6B | AX.89320931 | 2.27E+08 | 0.16 | -3.06    | 3.02 | 0.04 |
| E1 | GY   | 6B | AX.89747277 | 1.25E+08 | 0.22 | -2.80    | 3.17 | 0.05 |
| E1 | GY   | 6B | AX.89354586 | 2.35E+08 | 0.16 | -3.06    | 3.02 | 0.04 |
| E1 | GY   | 6B | AX.89747766 | 6.10E+08 | 0.16 | -3.24    | 3.35 | 0.06 |
| E1 | GY   | 6B | AX.89505563 | 4.66E+08 | 0.19 | -3.10    | 3.44 | 0.05 |
| E1 | GY   | 6B | AX.89508341 | 2.38E+08 | 0.16 | -3.06    | 3.02 | 0.04 |
| E1 | GY   | 6B | AX.89508341 | 2.38E+08 | 0.16 | -3.06    | 3.02 | 0.04 |
| E1 | GY   | 6B | AX.89759438 | 4.27E+07 | 0.36 | -2.73    | 3.91 | 0.06 |
| E1 | GY   | 6B | AX.89684340 | 4.63E+08 | 0.20 | -2.86    | 3.09 | 0.05 |
| E1 | GY   | 6B | AX.89631175 | 1.28E+08 | 0.07 | -5.14    | 4.11 | 0.07 |
| E1 | GY   | 6B | AX.89652368 | 4.28E+07 | 0.31 | -2.78    | 3.76 | 0.06 |
| E1 | GY   | 6B | AX.89357544 | 4.66E+08 | 0.20 | -2.86    | 3.09 | 0.05 |
| E1 | GY   | 6B | AX.89612774 | 1.29E+08 | 0.08 | -5.25    | 4.48 | 0.07 |
| E1 | GY   | 6B | AX.89462797 | 1.29E+08 | 0.08 | -5.25    | 4.48 | 0.07 |
| E1 | GY   | 6B | AX.89767544 | 4.26E+07 | 0.36 | -2.52    | 3.39 | 0.05 |
| E1 | GY   | 6B | AX.89463363 | 1.29E+08 | 0.07 | -5.52    | 4.65 | 0.08 |
| E1 | GY   | 6B | AX.89535702 | 1.29E+08 | 0.07 | -5.14    | 4.11 | 0.07 |
| E1 | GY   | 6B | AX.89326589 | 1.30E+08 | 0.08 | -5.25    | 4.48 | 0.07 |
| E1 | GY   | 6B | AX.89419965 | 6.42E+08 | 0.05 | -5.88    | 3.55 | 0.07 |
| E1 | GY   | 6B | AX.89680406 | 1.25E+08 | 0.22 | -2.78    | 3.15 | 0.05 |
| E1 | GY   | 6B | AX.89608575 | 1.29E+08 | 0.07 | -5.52    | 4.65 | 0.08 |
| E1 | GY   | 6B | AX.89753643 | 4.65E+08 | 0.20 | -2.86    | 3.09 | 0.05 |
| E1 | GY   | 6B | AX.89722924 | 4.26E+07 | 0.31 | -2.78    | 3.76 | 0.06 |
| E1 | GY   | 6B | AX.89534036 | 4.65E+08 | 0.20 | -2.86    | 3.09 | 0.05 |
| E1 | GY   | 6B | AX.89534036 | 4.65E+08 | 0.20 | -2.86    | 3.09 | 0.05 |
| E1 | GY   | 6B | AX.89620456 | 6.64E+08 | 0.07 | -4.56    | 3.18 | 0.05 |
| E1 | GY   | 6B | AX.89545203 | 1.29E+08 | 0.07 | -5.14    | 4.11 | 0.07 |
| E1 | GY   | 6B | AX.89573055 | 1.28E+08 | 0.07 | -5.42    | 4.28 | 0.07 |
| E1 | GY   | 6B | AX.89385970 | 1.27E+08 | 0.06 | -5.01    | 3.13 | 0.05 |
| E1 | GY   | 6B | AX.89493127 | 1.30E+08 | 0.07 | -5.52    | 4.65 | 0.08 |
| E1 | GY   | 6B | AX.89434922 | 4.64E+08 | 0.20 | -2.86    | 3.09 | 0.05 |
| E1 | GY   | 6B | AX.89540091 | 1.29E+08 | 0.07 | -5.52    | 4.65 | 0.08 |
| E1 | GY   | 6B | AX.89352558 | 1.29E+08 | 0.07 | -5.14    | 4.11 | 0.07 |
| E1 | GY   | 6B | AX.89635486 | 4.65E+08 | 0.20 | -2.86    | 3.09 | 0.05 |
| E1 | GPM2 | 6B | AX.89756296 | 1.30E+08 | 0.07 | -1291.54 | 3.98 | 0.07 |
| E1 | GY   | 6B | AX.89541016 | 4.65E+08 | 0.20 | -2.86    | 3.09 | 0.05 |
| E1 | GPM2 | 6B | AX.89424161 | 1.29E+08 | 0.08 | -1224.86 | 3.81 | 0.06 |
| E1 | GPM2 | 6B | AX.89402631 | 1.28E+08 | 0.07 | -1365.71 | 4.17 | 0.07 |

|    |      |    |             |          |      |          |      |      |
|----|------|----|-------------|----------|------|----------|------|------|
| E1 | GPM2 | 6B | AX.89608831 | 1.20E+07 | 0.20 | 824.14   | 3.85 | 0.07 |
| E1 | GY   | 6B | AX.89365639 | 6.41E+08 | 0.05 | -5.88    | 3.55 | 0.07 |
| E1 | GPM2 | 6B | AX.89704684 | 1.25E+08 | 0.15 | -882.07  | 3.49 | 0.06 |
| E1 | SPM2 | 6B | AX.89441080 | 6.78E+08 | 0.07 | 32.01    | 3.08 | 0.05 |
| E1 | GPM2 | 6B | AX.89696497 | 1.30E+08 | 0.08 | -1130.67 | 3.32 | 0.05 |
| E1 | GPM2 | 6B | AX.89525135 | 3.57E+06 | 0.27 | 863.77   | 4.94 | 0.09 |
| E1 | GPM2 | 6B | AX.89634365 | 1.30E+08 | 0.30 | 631.46   | 3.02 | 0.05 |
| E1 | GPM2 | 6B | AX.89428831 | 3.57E+06 | 0.13 | 881.05   | 3.08 | 0.05 |
| E1 | GY   | 6B | AX.89759438 | 4.27E+07 | 0.36 | -2.73    | 3.91 | 0.06 |
| E1 | GY   | 6B | AX.89607302 | 1.30E+08 | 0.07 | -5.52    | 4.65 | 0.08 |
| E1 | GY   | 6B | AX.89607302 | 1.30E+08 | 0.07 | -5.52    | 4.65 | 0.08 |
| E1 | GPM2 | 6B | AX.89518322 | 1.29E+08 | 0.08 | -1086.41 | 3.10 | 0.05 |
| E1 | GY   | 6B | AX.89323225 | 1.29E+08 | 0.08 | -5.25    | 4.48 | 0.07 |
| E1 | GPM2 | 6B | AX.89385970 | 1.27E+08 | 0.06 | -1374.75 | 3.52 | 0.06 |
| E1 | GPM2 | 6B | AX.89703604 | 1.70E+05 | 0.29 | 739.56   | 3.90 | 0.07 |
| E1 | GY   | 6B | AX.89544312 | 1.29E+08 | 0.07 | -5.52    | 4.65 | 0.08 |
| E1 | GY   | 6B | AX.89579714 | 1.18E+08 | 0.21 | -2.84    | 3.19 | 0.05 |
| E1 | GPM2 | 6B | AX.89400295 | 1.25E+08 | 0.14 | -879.32  | 3.39 | 0.05 |
| E1 | GPM2 | 6B | AX.89493997 | 1.30E+08 | 0.30 | 631.46   | 3.02 | 0.05 |
| E1 | GY   | 6B | AX.89430017 | 1.25E+08 | 0.22 | -2.77    | 3.10 | 0.05 |
| E1 | GPM2 | 6B | AX.89501645 | 1.29E+08 | 0.30 | 631.46   | 3.02 | 0.05 |
| E1 | GPM2 | 6B | AX.89561439 | 7.00E+05 | 0.19 | 810.77   | 3.57 | 0.06 |
| E1 | GPM2 | 6B | AX.89572587 | 1.27E+08 | 0.07 | -1290.12 | 3.97 | 0.07 |
| E1 | GY   | 6B | AX.89703732 | 1.29E+08 | 0.08 | -5.25    | 4.48 | 0.07 |
| E1 | GY   | 6B | AX.89716778 | 1.27E+08 | 0.07 | -5.14    | 4.11 | 0.07 |
| E1 | GY   | 6B | AX.89716778 | 1.27E+08 | 0.07 | -5.14    | 4.11 | 0.07 |
| E1 | GY   | 6B | AX.89765820 | 4.63E+08 | 0.20 | -2.85    | 3.03 | 0.04 |
| E1 | GPM2 | 6B | AX.89535702 | 1.29E+08 | 0.07 | -1290.12 | 3.97 | 0.07 |
| E1 | GY   | 6B | AX.89582883 | 4.66E+08 | 0.21 | -2.84    | 3.19 | 0.05 |
| E1 | GPM2 | 6B | AX.89762764 | 1.27E+08 | 0.07 | -1290.12 | 3.97 | 0.07 |
| E1 | GPM2 | 6B | AX.89703732 | 1.29E+08 | 0.08 | -1224.86 | 3.81 | 0.06 |
| E1 | GPM2 | 6B | AX.89485244 | 1.16E+07 | 0.12 | 971.92   | 3.44 | 0.06 |
| E1 | GY   | 6B | AX.89722924 | 4.26E+07 | 0.31 | -2.78    | 3.76 | 0.06 |
| E1 | GPM2 | 6B | AX.89445880 | 6.81E+08 | 0.34 | 610.64   | 3.03 | 0.05 |
| E1 | GPM2 | 6B | AX.89352327 | 1.27E+08 | 0.07 | -1365.71 | 4.17 | 0.07 |
| E1 | GY   | 6B | AX.89694977 | 2.35E+08 | 0.16 | -3.06    | 3.02 | 0.04 |
| E1 | GPM2 | 6B | AX.89518587 | 1.30E+08 | 0.07 | -1291.54 | 3.98 | 0.07 |
| E1 | GY   | 6B | AX.89768419 | 1.28E+08 | 0.07 | -5.42    | 4.28 | 0.07 |
| E1 | GY   | 6B | AX.89633298 | 4.27E+07 | 0.36 | -2.46    | 3.26 | 0.05 |
| E1 | GPM2 | 6B | AX.89345848 | 1.29E+08 | 0.07 | -1290.12 | 3.97 | 0.07 |
| E1 | GPM2 | 6B | AX.89540091 | 1.29E+08 | 0.07 | -1291.54 | 3.98 | 0.07 |
| E1 | GPM2 | 6B | AX.89518214 | 1.66E+05 | 0.28 | 791.39   | 4.35 | 0.08 |
| E1 | GY   | 6B | AX.89729238 | 4.65E+08 | 0.20 | -2.86    | 3.09 | 0.05 |
| E1 | GY   | 6B | AX.89729238 | 4.65E+08 | 0.20 | -2.86    | 3.09 | 0.05 |
| E1 | GPM2 | 6B | AX.89545203 | 1.29E+08 | 0.07 | -1290.12 | 3.97 | 0.07 |
| E1 | GPM2 | 6B | AX.89475763 | 1.27E+08 | 0.07 | -1365.71 | 4.17 | 0.07 |
| E1 | GPM2 | 6B | AX.89546236 | 1.29E+08 | 0.07 | -1290.12 | 3.97 | 0.07 |
| E1 | GY   | 6B | AX.89612588 | 2.35E+08 | 0.16 | -3.06    | 3.02 | 0.04 |
| E1 | GPM2 | 6B | AX.89773654 | 3.57E+06 | 0.28 | 859.72   | 5.04 | 0.09 |
| E1 | GPM2 | 6B | AX.89716778 | 1.27E+08 | 0.07 | -1290.12 | 3.97 | 0.07 |

|    |      |    |             |          |      |          |      |      |
|----|------|----|-------------|----------|------|----------|------|------|
| E1 | GPM2 | 6B | AX.89517996 | 1.29E+08 | 0.07 | -1290.12 | 3.97 | 0.07 |
| E1 | GPM2 | 6B | AX.89541349 | 7.97E+07 | 0.09 | -1062.96 | 3.26 | 0.05 |
| E1 | GPM2 | 6B | AX.89488095 | 1.30E+08 | 0.07 | -1291.54 | 3.98 | 0.07 |
| E1 | GPM2 | 6B | AX.89615713 | 1.25E+08 | 0.14 | -879.32  | 3.39 | 0.05 |
| E1 | GPM2 | 6B | AX.89388402 | 1.25E+08 | 0.22 | -742.58  | 3.40 | 0.05 |
| E1 | GPM2 | 6B | AX.89708341 | 1.28E+08 | 0.07 | -1365.71 | 4.17 | 0.07 |
| E1 | GY   | 6B | AX.89426492 | 6.06E+08 | 0.13 | -3.35    | 3.02 | 0.05 |
| E1 | GPM2 | 6B | AX.89463363 | 1.29E+08 | 0.07 | -1291.54 | 3.98 | 0.07 |
| E1 | GPM2 | 6B | AX.89768419 | 1.28E+08 | 0.07 | -1365.71 | 4.17 | 0.07 |
| E1 | GPM2 | 6B | AX.89464476 | 1.25E+08 | 0.14 | -879.32  | 3.39 | 0.05 |
| E1 | GPM2 | 6B | AX.89435297 | 6.81E+08 | 0.34 | 610.64   | 3.03 | 0.05 |
| E1 | GPM2 | 6B | AX.89443367 | 1.30E+08 | 0.08 | -1224.86 | 3.81 | 0.06 |
| E1 | GY   | 6B | AX.89741367 | 4.66E+08 | 0.20 | -2.86    | 3.09 | 0.05 |
| E1 | GY   | 6B | AX.89741367 | 4.66E+08 | 0.20 | -2.86    | 3.09 | 0.05 |
| E1 | GY   | 6B | AX.89521985 | 4.66E+08 | 0.21 | -2.84    | 3.19 | 0.05 |
| E1 | GPM2 | 6B | AX.89437168 | 1.29E+08 | 0.07 | -1290.12 | 3.97 | 0.07 |
| E1 | GY   | 6B | AX.89345848 | 1.29E+08 | 0.07 | -5.14    | 4.11 | 0.07 |
| E1 | GY   | 6B | AX.89312342 | 1.25E+08 | 0.22 | -2.78    | 3.15 | 0.05 |
| E1 | GY   | 6B | AX.89541623 | 2.38E+08 | 0.16 | -3.06    | 3.02 | 0.04 |
| E1 | GY   | 6B | AX.89370211 | 4.28E+07 | 0.36 | -2.64    | 3.70 | 0.05 |
| E1 | GPM2 | 6B | AX.89417745 | 1.25E+08 | 0.14 | -879.32  | 3.39 | 0.05 |
| E1 | GPM2 | 6B | AX.89618571 | 1.30E+08 | 0.30 | 631.46   | 3.02 | 0.05 |
| E1 | GY   | 6B | AX.89617086 | 1.27E+08 | 0.07 | -5.14    | 4.11 | 0.07 |
| E1 | GY   | 6B | AX.89617086 | 1.27E+08 | 0.07 | -5.14    | 4.11 | 0.07 |
| E1 | GY   | 6B | AX.89495986 | 4.66E+08 | 0.21 | -2.84    | 3.19 | 0.05 |
| E1 | GY   | 6B | AX.89680666 | 4.65E+08 | 0.20 | -2.86    | 3.09 | 0.05 |
| E1 | GPM2 | 6B | AX.89392775 | 4.17E+06 | 0.20 | 784.13   | 3.53 | 0.06 |
| E1 | GY   | 6B | AX.89756296 | 1.30E+08 | 0.07 | -5.52    | 4.65 | 0.08 |
| E1 | GY   | 6B | AX.89756296 | 1.30E+08 | 0.07 | -5.52    | 4.65 | 0.08 |
| E1 | GPM2 | 6B | AX.89628266 | 6.22E+07 | 0.08 | -1150.32 | 3.42 | 0.05 |
| E1 | GPM2 | 6B | AX.89417457 | 4.66E+08 | 0.21 | -713.98  | 3.05 | 0.05 |
| E1 | GPM2 | 6B | AX.89573055 | 1.28E+08 | 0.07 | -1365.71 | 4.17 | 0.07 |
| E1 | GPM2 | 6B | AX.89331939 | 1.25E+07 | 0.20 | 778.56   | 3.44 | 0.06 |
| E1 | GPM2 | 6B | AX.89323225 | 1.29E+08 | 0.08 | -1224.86 | 3.81 | 0.06 |
| E1 | GY   | 6B | AX.89709910 | 4.66E+08 | 0.21 | -2.84    | 3.19 | 0.05 |
| E1 | GPM2 | 6B | AX.89678904 | 1.29E+08 | 0.08 | -1224.86 | 3.81 | 0.06 |
| E1 | GPM2 | 6B | AX.89553125 | 1.30E+08 | 0.30 | 631.46   | 3.02 | 0.05 |
| E1 | GPS  | 6B | AX.89402646 | 4.89E+06 | 0.13 | 1.66     | 3.13 | 0.05 |
| E1 | GPM2 | 6B | AX.89521559 | 1.29E+08 | 0.07 | -1290.12 | 3.97 | 0.07 |
| E1 | GY   | 6B | AX.89443367 | 1.30E+08 | 0.08 | -5.25    | 4.48 | 0.07 |
| E1 | GY   | 6B | AX.89443367 | 1.30E+08 | 0.08 | -5.25    | 4.48 | 0.07 |
| E1 | GPM2 | 6B | AX.89608575 | 1.29E+08 | 0.07 | -1291.54 | 3.98 | 0.07 |
| E1 | GPM2 | 6B | AX.89621317 | 1.97E+05 | 0.20 | 782.46   | 3.52 | 0.06 |
| E1 | GPM2 | 6B | AX.89563387 | 6.87E+08 | 0.24 | -717.47  | 3.32 | 0.06 |
| E1 | GPM2 | 6B | AX.89747277 | 1.25E+08 | 0.22 | -752.52  | 3.43 | 0.05 |
| E1 | GPM2 | 6B | AX.89697805 | 1.30E+08 | 0.08 | -1224.86 | 3.81 | 0.06 |
| E1 | GY   | 6B | AX.89613744 | 6.42E+08 | 0.05 | -5.88    | 3.55 | 0.07 |
| E1 | GY   | 6B | AX.89572587 | 1.27E+08 | 0.07 | -5.14    | 4.11 | 0.07 |
| E1 | GPM2 | 6B | AX.89713760 | 3.57E+06 | 0.29 | 811.61   | 4.63 | 0.08 |
| E1 | GPM2 | 6B | AX.89309973 | 1.69E+05 | 0.29 | 739.56   | 3.90 | 0.07 |

|    |      |    |             |          |      |          |      |      |
|----|------|----|-------------|----------|------|----------|------|------|
| E1 | GY   | 6B | AX.89740128 | 6.41E+08 | 0.05 | -5.88    | 3.55 | 0.07 |
| E1 | GPM2 | 6B | AX.89526051 | 2.45E+05 | 0.27 | 839.88   | 4.70 | 0.09 |
| E1 | GY   | 6B | AX.89385970 | 1.27E+08 | 0.06 | -5.01    | 3.13 | 0.05 |
| E1 | GPM2 | 6B | AX.89385433 | 1.29E+08 | 0.07 | -1290.12 | 3.97 | 0.07 |
| E1 | GPM2 | 6B | AX.89409984 | 4.63E+08 | 0.20 | -761.27  | 3.26 | 0.05 |
| E1 | GPM2 | 6B | AX.89505918 | 3.48E+08 | 0.06 | -1291.18 | 3.16 | 0.05 |
| E1 | GY   | 6B | AX.89744302 | 1.29E+08 | 0.07 | -5.14    | 4.11 | 0.07 |
| E1 | GPM2 | 6B | AX.89730316 | 1.30E+08 | 0.08 | -1224.86 | 3.81 | 0.06 |
| E1 | GY   | 6B | AX.89644949 | 2.35E+08 | 0.16 | -3.06    | 3.02 | 0.04 |
| E1 | GY   | 6B | AX.89708341 | 1.28E+08 | 0.07 | -5.42    | 4.28 | 0.07 |
| E1 | GY   | 6B | AX.89352327 | 1.27E+08 | 0.07 | -5.42    | 4.28 | 0.07 |
| E1 | GY   | 6B | AX.89683690 | 4.65E+08 | 0.20 | -2.86    | 3.09 | 0.05 |
| E1 | GPM2 | 6B | AX.89589396 | 1.27E+08 | 0.07 | -1290.12 | 3.97 | 0.07 |
| E1 | GPM2 | 6B | AX.89770202 | 3.57E+06 | 0.29 | 831.26   | 4.79 | 0.09 |
| E1 | GPM2 | 6B | AX.89547076 | 1.29E+08 | 0.07 | -1290.12 | 3.97 | 0.07 |
| E1 | GPM2 | 6B | AX.89768266 | 2.51E+05 | 0.29 | 765.15   | 4.17 | 0.08 |
| E1 | GPM2 | 6B | AX.89580063 | 3.57E+06 | 0.19 | 773.78   | 3.30 | 0.06 |
| E1 | GPM2 | 6B | AX.89773606 | 1.29E+08 | 0.30 | 631.46   | 3.02 | 0.05 |
| E1 | GPM2 | 6B | AX.89765957 | 1.25E+08 | 0.22 | -742.58  | 3.40 | 0.05 |
| E1 | GPM2 | 6B | AX.89646939 | 1.28E+08 | 0.07 | -1365.71 | 4.17 | 0.07 |
| E1 | GPM2 | 6B | AX.89572428 | 1.24E+07 | 0.20 | 778.56   | 3.44 | 0.06 |
| E1 | GPM2 | 6B | AX.89552080 | 4.16E+06 | 0.20 | 784.13   | 3.53 | 0.06 |
| E1 | GY   | 6B | AX.89683318 | 6.10E+08 | 0.18 | -3.09    | 3.26 | 0.06 |
| E1 | GY   | 6B | AX.89683318 | 6.10E+08 | 0.18 | -3.09    | 3.26 | 0.06 |
| E1 | GY   | 6B | AX.89577920 | 4.65E+08 | 0.20 | -2.86    | 3.09 | 0.05 |
| E1 | GPM2 | 6B | AX.89669783 | 1.28E+08 | 0.07 | -1179.62 | 3.06 | 0.05 |
| E1 | GPM2 | 6B | AX.89409455 | 6.81E+08 | 0.34 | 610.64   | 3.03 | 0.05 |
| E1 | GPM2 | 6B | AX.89675809 | 1.25E+08 | 0.15 | -882.07  | 3.49 | 0.06 |
| E1 | GY   | 6B | AX.89505563 | 4.66E+08 | 0.19 | -3.10    | 3.44 | 0.05 |
| E1 | GPM2 | 6B | AX.89589691 | 4.71E+08 | 0.14 | -944.40  | 3.75 | 0.06 |
| E1 | GY   | 6B | AX.89589396 | 1.27E+08 | 0.07 | -5.14    | 4.11 | 0.07 |
| E1 | GY   | 6B | AX.89684340 | 4.63E+08 | 0.20 | -2.86    | 3.09 | 0.05 |
| E1 | GY   | 6B | AX.89631175 | 1.28E+08 | 0.07 | -5.14    | 4.11 | 0.07 |
| E1 | GY   | 6B | AX.89774402 | 2.36E+08 | 0.16 | -3.06    | 3.02 | 0.04 |
| E1 | GY   | 6B | AX.89616707 | 4.66E+08 | 0.20 | -3.12    | 3.54 | 0.05 |
| E1 | GY   | 6B | AX.89613744 | 6.42E+08 | 0.05 | -5.88    | 3.55 | 0.07 |
| E1 | GY   | 6B | AX.89681269 | 2.38E+08 | 0.16 | -3.06    | 3.02 | 0.04 |
| E1 | GY   | 6B | AX.89385433 | 1.29E+08 | 0.07 | -5.14    | 4.11 | 0.07 |
| E1 | GY   | 6B | AX.89385433 | 1.29E+08 | 0.07 | -5.14    | 4.11 | 0.07 |
| E1 | GY   | 6B | AX.89575719 | 1.29E+08 | 0.07 | -5.14    | 4.11 | 0.07 |
| E1 | GPM2 | 6B | AX.89607302 | 1.30E+08 | 0.07 | -1291.54 | 3.98 | 0.07 |
| E1 | GPM2 | 6B | AX.89612774 | 1.29E+08 | 0.08 | -1224.86 | 3.81 | 0.06 |
| E1 | GPM2 | 6B | AX.89563872 | 1.25E+08 | 0.22 | -742.58  | 3.40 | 0.05 |
| E1 | GPM2 | 6B | AX.89441447 | 1.69E+05 | 0.29 | 739.56   | 3.90 | 0.07 |
| E1 | GY   | 6B | AX.89543445 | 4.65E+08 | 0.20 | -2.86    | 3.09 | 0.05 |
| E1 | GPM2 | 6B | AX.89543948 | 1.27E+08 | 0.07 | -1290.12 | 3.97 | 0.07 |
| E1 | GPM2 | 6B | AX.89369961 | 1.29E+08 | 0.30 | 631.46   | 3.02 | 0.05 |
| E1 | GPM2 | 6B | AX.89436988 | 3.57E+06 | 0.29 | 831.26   | 4.79 | 0.09 |
| E1 | GPM2 | 6B | AX.89544388 | 1.66E+05 | 0.28 | 777.59   | 4.18 | 0.08 |
| E1 | GPM2 | 6B | AX.89446890 | 8.73E+07 | 0.09 | -1129.96 | 3.62 | 0.06 |

|    |      |    |             |          |      |          |      |      |
|----|------|----|-------------|----------|------|----------|------|------|
| E1 | GPM2 | 6B | AX.89660252 | 1.29E+08 | 0.07 | -1290.12 | 3.97 | 0.07 |
| E1 | GPM2 | 6B | AX.89462431 | 1.25E+08 | 0.15 | -882.07  | 3.49 | 0.06 |
| E1 | GPM2 | 6B | AX.89519130 | 7.16E+08 | 0.40 | 614.84   | 3.26 | 0.06 |
| E1 | GPM2 | 6B | AX.89597949 | 1.29E+08 | 0.07 | -1291.54 | 3.98 | 0.07 |
| E1 | GPM2 | 6B | AX.89433965 | 1.30E+08 | 0.30 | 631.46   | 3.02 | 0.05 |
| E1 | GY   | 6B | AX.89765820 | 4.63E+08 | 0.20 | -2.85    | 3.03 | 0.04 |
| E1 | GPM2 | 6B | AX.89411984 | 6.87E+08 | 0.24 | -717.47  | 3.32 | 0.06 |
| E1 | GPM2 | 6B | AX.89326589 | 1.30E+08 | 0.08 | -1224.86 | 3.81 | 0.06 |
| E1 | GPM2 | 6B | AX.89536390 | 1.29E+08 | 0.30 | 631.46   | 3.02 | 0.05 |
| E1 | GPM2 | 6B | AX.89628919 | 1.27E+08 | 0.07 | -1365.71 | 4.17 | 0.07 |
| E1 | GPM2 | 6B | AX.89587336 | 1.29E+08 | 0.08 | -1224.86 | 3.81 | 0.06 |
| E1 | GPM2 | 6B | AX.89617086 | 1.27E+08 | 0.07 | -1290.12 | 3.97 | 0.07 |
| E1 | GY   | 6B | AX.89620456 | 6.64E+08 | 0.07 | -4.56    | 3.18 | 0.05 |
| E1 | GY   | 6B | AX.89374488 | 2.35E+08 | 0.16 | -3.38    | 3.51 | 0.05 |
| E1 | GPM2 | 6B | AX.89434614 | 1.29E+08 | 0.30 | 631.46   | 3.02 | 0.05 |
| E1 | GPM2 | 6B | AX.89620456 | 6.64E+08 | 0.07 | -1229.28 | 3.47 | 0.06 |
| E1 | GPM2 | 6B | AX.89597386 | 1.25E+08 | 0.14 | -861.75  | 3.20 | 0.05 |
| E1 | GPM2 | 6B | AX.89622419 | 1.25E+08 | 0.22 | -742.58  | 3.40 | 0.05 |
| E1 | GPM2 | 6B | AX.89735832 | 8.02E+07 | 0.09 | -1081.70 | 3.49 | 0.06 |
| E1 | GPM2 | 6B | AX.89312342 | 1.25E+08 | 0.22 | -742.58  | 3.40 | 0.05 |
| E1 | GPM2 | 6B | AX.89475640 | 1.28E+08 | 0.07 | -1290.12 | 3.97 | 0.07 |
| E1 | GPM2 | 6B | AX.89493127 | 1.30E+08 | 0.07 | -1291.54 | 3.98 | 0.07 |
| E1 | GY   | 6B | AX.89471542 | 2.35E+08 | 0.16 | -3.06    | 3.02 | 0.04 |
| E1 | GY   | 6B | AX.89508204 | 4.63E+08 | 0.20 | -2.86    | 3.09 | 0.05 |
| E1 | GPM2 | 6B | AX.89575719 | 1.29E+08 | 0.07 | -1290.12 | 3.97 | 0.07 |
| E1 | GPM2 | 6B | AX.89525639 | 6.22E+06 | 0.35 | 625.28   | 3.21 | 0.06 |
| E1 | GPM2 | 6B | AX.89744302 | 1.29E+08 | 0.07 | -1290.12 | 3.97 | 0.07 |
| E1 | GPM2 | 6B | AX.89419906 | 1.30E+08 | 0.07 | -1291.54 | 3.98 | 0.07 |
| E1 | GPM2 | 6B | AX.89476655 | 1.29E+08 | 0.07 | -1290.12 | 3.97 | 0.07 |
| E1 | GPM2 | 6B | AX.89421263 | 1.28E+08 | 0.07 | -1365.71 | 4.17 | 0.07 |
| E1 | GPM2 | 6B | AX.89681545 | 4.69E+08 | 0.14 | -848.70  | 3.19 | 0.05 |
| E1 | GPM2 | 6B | AX.89626004 | 1.29E+08 | 0.07 | -1481.51 | 4.54 | 0.08 |
| E1 | GPM2 | 6B | AX.89325291 | 1.28E+08 | 0.07 | -1333.87 | 3.78 | 0.06 |
| E1 | GPM2 | 6B | AX.89352558 | 1.29E+08 | 0.07 | -1290.12 | 3.97 | 0.07 |
| E1 | GPM2 | 6B | AX.89323627 | 1.30E+08 | 0.07 | -1291.54 | 3.98 | 0.07 |
| E1 | GY   | 6B | AX.89546236 | 1.29E+08 | 0.07 | -5.14    | 4.11 | 0.07 |
| E1 | GPM2 | 6B | AX.89319508 | 1.29E+08 | 0.07 | -1145.18 | 3.24 | 0.05 |
| E1 | GPM2 | 6B | AX.89338973 | 1.14E+05 | 0.30 | 803.64   | 4.59 | 0.08 |
| E1 | GPM2 | 6B | AX.89770307 | 6.81E+08 | 0.34 | 610.64   | 3.03 | 0.05 |
| E1 | GPM2 | 6B | AX.89745770 | 1.28E+08 | 0.07 | -1290.12 | 3.97 | 0.07 |
| E1 | GPM2 | 6B | AX.89514422 | 4.69E+08 | 0.14 | -848.70  | 3.19 | 0.05 |
| E1 | GPM2 | 6B | AX.89544312 | 1.29E+08 | 0.07 | -1291.54 | 3.98 | 0.07 |
| E1 | GPM2 | 6B | AX.89492919 | 1.29E+08 | 0.30 | 631.46   | 3.02 | 0.05 |
| E1 | GPM2 | 6B | AX.89618250 | 1.29E+08 | 0.30 | 631.46   | 3.02 | 0.05 |
| E1 | GPM2 | 6B | AX.89611281 | 6.81E+08 | 0.34 | 610.64   | 3.03 | 0.05 |
| E1 | TKW  | 6B | AX.89521152 | 6.71E+08 | 0.32 | 0.90     | 3.03 | 0.05 |
| E1 | GPM2 | 6B | AX.89652273 | 1.67E+05 | 0.20 | 768.57   | 3.31 | 0.06 |
| E1 | GPM2 | 6B | AX.89727379 | 1.20E+07 | 0.20 | 783.10   | 3.52 | 0.06 |
| E1 | GY   | 6B | AX.89583493 | 4.65E+08 | 0.20 | -2.86    | 3.09 | 0.05 |
| E1 | GPM2 | 6B | AX.89328387 | 1.28E+08 | 0.07 | -1365.71 | 4.17 | 0.07 |



|    |      |    |             |          |      |          |      |      |
|----|------|----|-------------|----------|------|----------|------|------|
| E1 | GY   | 6B | AX.89497224 | 4.63E+08 | 0.20 | -2.86    | 3.09 | 0.05 |
| E1 | GPM2 | 6B | AX.89430017 | 1.25E+08 | 0.22 | -734.89  | 3.29 | 0.05 |
| E1 | GY   | 6B | AX.89560383 | 4.26E+07 | 0.35 | -2.53    | 3.40 | 0.05 |
| E1 | GPM2 | 6B | AX.89604116 | 1.29E+08 | 0.30 | 631.46   | 3.02 | 0.05 |
| E1 | GPM2 | 6B | AX.89527251 | 6.34E+06 | 0.34 | -635.94  | 3.25 | 0.06 |
| E1 | GY   | 6B | AX.89577920 | 4.65E+08 | 0.20 | -2.86    | 3.09 | 0.05 |
| E1 | GPM2 | 6B | AX.89631175 | 1.28E+08 | 0.07 | -1290.12 | 3.97 | 0.07 |
| E1 | GPM2 | 6B | AX.89647703 | 1.29E+08 | 0.07 | -1291.54 | 3.98 | 0.07 |
| E1 | GY   | 6B | AX.89774402 | 2.36E+08 | 0.16 | -3.06    | 3.02 | 0.04 |
| E1 | TKW  | 6B | AX.89740335 | 3.27E+07 | 0.07 | -1.96    | 4.14 | 0.07 |
| E1 | TKW  | 6B | AX.89578722 | 6.70E+08 | 0.32 | 0.90     | 3.03 | 0.05 |
| E1 | GY   | 6B | AX.89681269 | 2.38E+08 | 0.16 | -3.06    | 3.02 | 0.04 |
| E1 | GY   | 6B | AX.89645517 | 2.27E+08 | 0.16 | -3.06    | 3.02 | 0.04 |
| E1 | TKW  | 6B | AX.89433241 | 6.70E+08 | 0.32 | 0.90     | 3.03 | 0.05 |
| E1 | TKW  | 6B | AX.89402449 | 4.94E+07 | 0.05 | -1.90    | 3.06 | 0.05 |
| E1 | GPM2 | 6B | AX.89336582 | 1.28E+08 | 0.08 | -1200.75 | 3.85 | 0.06 |
| E1 | GPM2 | 6B | AX.89462797 | 1.29E+08 | 0.08 | -1224.86 | 3.81 | 0.06 |
| E1 | TKW  | 6B | AX.89772714 | 6.71E+08 | 0.32 | 0.90     | 3.03 | 0.05 |
| E1 | GPM2 | 6B | AX.89680406 | 1.25E+08 | 0.22 | -742.58  | 3.40 | 0.05 |
| E1 | GY   | 6B | AX.89709192 | 1.28E+08 | 0.06 | -5.09    | 3.42 | 0.05 |
| E1 | GPM2 | 6B | AX.89707549 | 1.28E+08 | 0.07 | -1290.12 | 3.97 | 0.07 |
| E1 | GPM2 | 6B | AX.89745555 | 5.97E+07 | 0.07 | -1366.69 | 3.95 | 0.06 |
| E1 | TKW  | 6B | AX.89738573 | 2.78E+07 | 0.15 | -1.22    | 3.27 | 0.05 |
| E1 | TKW  | 6B | AX.89536469 | 3.26E+07 | 0.08 | -1.64    | 3.36 | 0.06 |
| E1 | TKW  | 6B | AX.89746864 | 3.26E+07 | 0.08 | -1.64    | 3.36 | 0.06 |
| E1 | GPM2 | 6B | AX.89370625 | 3.57E+06 | 0.28 | 794.98   | 4.39 | 0.08 |
| E1 | TKW  | 6B | AX.89512454 | 6.66E+08 | 0.37 | 0.86     | 3.04 | 0.05 |
| E1 | GY   | 6B | AX.89763125 | 4.66E+08 | 0.20 | -2.86    | 3.09 | 0.05 |
| E2 | SPM2 | 6B | AX.89773950 | 6.67E+08 | 0.10 | 19.47    | 3.11 | 0.05 |
| E2 | SPM2 | 6B | AX.89415057 | 2.80E+07 | 0.29 | 13.83    | 3.45 | 0.06 |
| E2 | GY   | 6B | AX.89647084 | 6.42E+08 | 0.05 | -5.15    | 3.87 | 0.08 |
| E2 | SPM2 | 6B | AX.89526185 | 6.65E+08 | 0.10 | 20.12    | 3.18 | 0.05 |
| E2 | SPM2 | 6B | AX.89737931 | 6.68E+08 | 0.10 | 20.12    | 3.18 | 0.05 |
| E2 | SPM2 | 6B | AX.89541004 | 2.80E+07 | 0.25 | 15.00    | 3.64 | 0.06 |
| E2 | GY   | 6B | AX.89365639 | 6.41E+08 | 0.05 | -5.15    | 3.87 | 0.08 |
| E2 | GY   | 6B | AX.89365837 | 1.15E+07 | 0.28 | 2.26     | 3.47 | 0.04 |
| E2 | SPM2 | 6B | AX.89515773 | 2.80E+07 | 0.30 | 12.65    | 3.03 | 0.05 |
| E2 | SPM2 | 6B | AX.89518009 | 2.80E+07 | 0.28 | 14.28    | 3.61 | 0.06 |
| E2 | SPM2 | 6B | AX.89667976 | 6.65E+08 | 0.10 | 20.12    | 3.18 | 0.05 |
| E2 | SPM2 | 6B | AX.89522613 | 6.97E+08 | 0.23 | 13.98    | 3.08 | 0.05 |
| E2 | SPM2 | 6B | AX.89548133 | 6.67E+08 | 0.10 | 20.12    | 3.18 | 0.05 |
| E2 | GY   | 6B | AX.89368639 | 3.42E+07 | 0.06 | -4.00    | 3.12 | 0.04 |
| E2 | GY   | 6B | AX.89368639 | 3.42E+07 | 0.06 | -4.00    | 3.12 | 0.04 |
| E2 | SPM2 | 6B | AX.89405089 | 6.64E+08 | 0.09 | 20.28    | 3.10 | 0.05 |
| E2 | SPM2 | 6B | AX.89573293 | 6.65E+08 | 0.10 | 19.93    | 3.24 | 0.05 |
| E2 | SPM2 | 6B | AX.89775847 | 1.93E+08 | 0.05 | 27.22    | 3.20 | 0.03 |
| E2 | GY   | 6B | AX.89488073 | 1.26E+07 | 0.40 | -2.02    | 3.33 | 0.05 |
| E2 | SPM2 | 6B | AX.89636583 | 6.65E+08 | 0.10 | 20.12    | 3.18 | 0.05 |
| E2 | SPM2 | 6B | AX.89481103 | 6.67E+08 | 0.11 | 19.55    | 3.35 | 0.06 |
| E2 | SPM2 | 6B | AX.89653179 | 6.66E+08 | 0.10 | 19.47    | 3.11 | 0.05 |

|    |      |    |             |          |      |         |      |      |
|----|------|----|-------------|----------|------|---------|------|------|
| E2 | SPM2 | 6B | AX.89700613 | 4.87E+08 | 0.07 | 25.80   | 3.54 | 0.06 |
| E2 | SPM2 | 6B | AX.89446956 | 6.65E+08 | 0.11 | 20.14   | 3.41 | 0.06 |
| E2 | SPM2 | 6B | AX.89651887 | 1.15E+08 | 0.08 | 21.27   | 3.10 | 0.05 |
| E2 | SPM2 | 6B | AX.89684723 | 6.65E+08 | 0.10 | 20.12   | 3.18 | 0.05 |
| E2 | SPM2 | 6B | AX.89456984 | 2.80E+07 | 0.28 | 14.28   | 3.61 | 0.06 |
| E2 | SPM2 | 6B | AX.89760593 | 6.68E+08 | 0.11 | 19.55   | 3.35 | 0.06 |
| E2 | SPM2 | 6B | AX.89659500 | 6.66E+08 | 0.10 | 20.12   | 3.18 | 0.05 |
| E2 | SPM2 | 6B | AX.89453079 | 6.67E+08 | 0.10 | 20.12   | 3.18 | 0.05 |
| E2 | SPM2 | 6B | AX.89370949 | 2.80E+07 | 0.29 | 13.33   | 3.26 | 0.06 |
| E2 | GPS  | 6B | AX.89390995 | 6.87E+08 | 0.34 | -1.47   | 3.33 | 0.06 |
| E2 | SPM2 | 6B | AX.89363496 | 2.80E+07 | 0.31 | 12.57   | 3.02 | 0.05 |
| E2 | SPM2 | 6B | AX.89520467 | 2.32E+08 | 0.05 | 26.24   | 3.01 | 0.05 |
| E2 | SPM2 | 6B | AX.89527556 | 6.66E+08 | 0.11 | 19.55   | 3.35 | 0.06 |
| E2 | GY   | 6B | AX.89446890 | 8.73E+07 | 0.09 | -3.30   | 3.03 | 0.04 |
| E2 | GY   | 6B | AX.89446890 | 8.73E+07 | 0.09 | -3.30   | 3.03 | 0.04 |
| E2 | GPS  | 6B | AX.89702417 | 6.64E+08 | 0.37 | 1.66    | 4.27 | 0.07 |
| E2 | GPS  | 6B | AX.89772591 | 2.13E+07 | 0.31 | 1.46    | 3.20 | 0.05 |
| E2 | GPM2 | 6B | AX.89433241 | 6.70E+08 | 0.31 | -602.64 | 3.82 | 0.06 |
| E2 | GY   | 6B | AX.89613744 | 6.42E+08 | 0.05 | -5.15   | 3.87 | 0.08 |
| E2 | GY   | 6B | AX.89613744 | 6.42E+08 | 0.05 | -5.15   | 3.87 | 0.08 |
| E2 | GPS  | 6B | AX.89748271 | 4.74E+08 | 0.43 | 1.34    | 3.09 | 0.04 |
| E2 | GY   | 6B | AX.89488073 | 1.26E+07 | 0.40 | -2.02   | 3.33 | 0.05 |
| E2 | GPS  | 6B | AX.89456512 | 6.87E+08 | 0.31 | -1.55   | 3.50 | 0.06 |
| E2 | GY   | 6B | AX.89438340 | 6.42E+08 | 0.05 | -5.15   | 3.87 | 0.08 |
| E2 | GY   | 6B | AX.89438340 | 6.42E+08 | 0.05 | -5.15   | 3.87 | 0.08 |
| E2 | GY   | 6B | AX.89419179 | 3.42E+07 | 0.06 | -4.00   | 3.12 | 0.04 |
| E2 | GY   | 6B | AX.89419179 | 3.42E+07 | 0.06 | -4.00   | 3.12 | 0.04 |
| E2 | GPS  | 6B | AX.89442646 | 6.64E+08 | 0.39 | 1.41    | 3.27 | 0.05 |
| E2 | GPS  | 6B | AX.89700474 | 4.74E+08 | 0.43 | 1.34    | 3.09 | 0.04 |
| E2 | GPS  | 6B | AX.89533411 | 4.74E+08 | 0.43 | 1.34    | 3.09 | 0.04 |
| E2 | GPS  | 6B | AX.89485699 | 6.87E+08 | 0.31 | -1.50   | 3.33 | 0.06 |
| E2 | GY   | 6B | AX.89419965 | 6.42E+08 | 0.05 | -5.15   | 3.87 | 0.08 |
| E2 | GY   | 6B | AX.89419965 | 6.42E+08 | 0.05 | -5.15   | 3.87 | 0.08 |
| E2 | GPS  | 6B | AX.89538522 | 4.27E+07 | 0.47 | -1.43   | 3.50 | 0.07 |
| E2 | TKW  | 6B | AX.89659495 | 1.00E+08 | 0.15 | -1.38   | 3.12 | 0.06 |
| E2 | TKW  | 6B | AX.89344094 | 9.41E+07 | 0.15 | -1.38   | 3.12 | 0.06 |
| E2 | GPS  | 6B | AX.89471658 | 6.84E+08 | 0.41 | -1.39   | 3.24 | 0.05 |
| E2 | GY   | 6B | AX.89647084 | 6.42E+08 | 0.05 | -5.15   | 3.87 | 0.08 |
| E2 | GY   | 6B | AX.89365639 | 6.41E+08 | 0.05 | -5.15   | 3.87 | 0.08 |
| E2 | GY   | 6B | AX.89365837 | 1.15E+07 | 0.28 | 2.26    | 3.47 | 0.04 |
| E2 | GPS  | 6B | AX.89364761 | 6.65E+08 | 0.46 | 1.54    | 3.95 | 0.07 |
| E2 | GPS  | 6B | AX.89558971 | 6.87E+08 | 0.24 | -1.54   | 3.06 | 0.05 |
| E2 | TKW  | 6B | AX.89689694 | 1.13E+08 | 0.15 | -1.38   | 3.12 | 0.06 |
| E2 | GPS  | 6B | AX.89468332 | 6.65E+08 | 0.47 | 1.42    | 3.47 | 0.06 |
| E2 | GPS  | 6B | AX.89725372 | 6.66E+08 | 0.48 | -1.34   | 3.14 | 0.04 |
| E2 | TKW  | 6B | AX.89511298 | 6.71E+08 | 0.32 | 1.13    | 3.51 | 0.07 |
| E2 | GPS  | 6B | AX.89386498 | 4.74E+08 | 0.43 | 1.34    | 3.09 | 0.04 |
| E2 | GPS  | 6B | AX.89328871 | 4.74E+08 | 0.43 | 1.34    | 3.09 | 0.04 |
| E2 | GPS  | 6B | AX.89463926 | 4.74E+08 | 0.43 | 1.34    | 3.09 | 0.04 |
| E2 | GPS  | 6B | AX.89710107 | 6.80E+08 | 0.32 | 1.52    | 3.45 | 0.05 |

|    |      |    |             |          |      |         |      |      |
|----|------|----|-------------|----------|------|---------|------|------|
| E2 | GY   | 6B | AX.89740128 | 6.41E+08 | 0.05 | -5.15   | 3.87 | 0.08 |
| E2 | GY   | 6B | AX.89740128 | 6.41E+08 | 0.05 | -5.15   | 3.87 | 0.08 |
| E2 | GPS  | 6B | AX.89474705 | 6.65E+08 | 0.46 | 1.48    | 3.70 | 0.06 |
| E2 | TKW  | 6B | AX.89772714 | 6.71E+08 | 0.31 | 1.22    | 3.95 | 0.08 |
| E2 | GPS  | 6B | AX.89494058 | 4.74E+08 | 0.43 | 1.34    | 3.09 | 0.04 |
| E2 | GPS  | 6B | AX.89715367 | 6.87E+08 | 0.31 | -1.57   | 3.60 | 0.06 |
| E2 | GPM2 | 6B | AX.89772714 | 6.71E+08 | 0.31 | -602.64 | 3.82 | 0.06 |
| E2 | GPS  | 6B | AX.89689408 | 4.74E+08 | 0.43 | 1.41    | 3.39 | 0.04 |
| E2 | GPS  | 6B | AX.89756587 | 6.65E+08 | 0.47 | 1.44    | 3.54 | 0.06 |
| E2 | GPS  | 6B | AX.89724994 | 6.91E+08 | 0.40 | -1.46   | 3.50 | 0.06 |
| E2 | GPS  | 6B | AX.89718746 | 6.65E+08 | 0.47 | 1.40    | 3.36 | 0.05 |
| E2 | GPS  | 6B | AX.89614845 | 6.87E+08 | 0.30 | -1.66   | 3.87 | 0.07 |
| E2 | GPS  | 6B | AX.89647238 | 6.87E+08 | 0.30 | -1.66   | 3.87 | 0.07 |
| E2 | TKW  | 6B | AX.89550703 | 3.41E+07 | 0.46 | 0.97    | 3.02 | 0.06 |
| E2 | GPS  | 6B | AX.89609142 | 4.74E+08 | 0.43 | 1.34    | 3.09 | 0.04 |
| E2 | GPM2 | 6B | AX.89512454 | 6.66E+08 | 0.37 | -524.19 | 3.20 | 0.04 |
| E2 | GPM2 | 6B | AX.89511298 | 6.71E+08 | 0.32 | -561.31 | 3.43 | 0.05 |
| E2 | GPS  | 6B | AX.89448317 | 6.87E+08 | 0.30 | -1.66   | 3.87 | 0.07 |
| E2 | GPM2 | 6B | AX.89672126 | 6.87E+08 | 0.29 | -536.18 | 3.07 | 0.05 |
| E2 | GPM2 | 6B | AX.89550703 | 3.41E+07 | 0.46 | -533.29 | 3.51 | 0.08 |
| E2 | GPS  | 6B | AX.89508888 | 6.94E+08 | 0.49 | -1.34   | 3.13 | 0.05 |
| E2 | GPS  | 6B | AX.89672126 | 6.87E+08 | 0.29 | -1.67   | 3.87 | 0.07 |
| E2 | GPS  | 6B | AX.89501409 | 6.87E+08 | 0.34 | -1.42   | 3.16 | 0.05 |
| E2 | GPS  | 6B | AX.89581796 | 6.64E+08 | 0.46 | 1.44    | 3.54 | 0.06 |
| E2 | GPS  | 6B | AX.89637862 | 6.69E+08 | 0.38 | 1.57    | 3.90 | 0.06 |
| E2 | GPS  | 6B | AX.89742164 | 6.65E+08 | 0.46 | 1.48    | 3.70 | 0.06 |
| E2 | GPS  | 6B | AX.89636340 | 6.80E+08 | 0.32 | 1.52    | 3.45 | 0.05 |
| E2 | GPS  | 6B | AX.89545263 | 6.83E+08 | 0.29 | -1.48   | 3.11 | 0.05 |
| E2 | GPS  | 6B | AX.89644130 | 6.80E+08 | 0.32 | 1.52    | 3.45 | 0.05 |
| E2 | GPS  | 6B | AX.89430100 | 6.80E+08 | 0.32 | 1.52    | 3.45 | 0.05 |
| E2 | GPS  | 6B | AX.89367463 | 4.74E+08 | 0.43 | 1.34    | 3.09 | 0.04 |
| E2 | GPS  | 6B | AX.89553995 | 4.74E+08 | 0.43 | 1.34    | 3.09 | 0.04 |
| E2 | GPS  | 6B | AX.89453195 | 6.65E+08 | 0.47 | 1.44    | 3.54 | 0.06 |
| E2 | GPS  | 6B | AX.89774584 | 6.87E+08 | 0.24 | -1.54   | 3.06 | 0.05 |
| E2 | GPS  | 6B | AX.89502067 | 4.74E+08 | 0.43 | 1.34    | 3.09 | 0.04 |
| E2 | TKW  | 6B | AX.89578722 | 6.70E+08 | 0.31 | 1.22    | 3.95 | 0.08 |
| E2 | GPS  | 6B | AX.89572829 | 4.74E+08 | 0.42 | 1.42    | 3.38 | 0.04 |
| E2 | GPS  | 6B | AX.89406272 | 6.80E+08 | 0.32 | 1.52    | 3.45 | 0.05 |
| E2 | GPM2 | 6B | AX.89393124 | 6.65E+08 | 0.43 | -504.00 | 3.13 | 0.06 |
| E2 | GPS  | 6B | AX.89582169 | 2.27E+08 | 0.07 | -2.84   | 3.42 | 0.07 |
| E2 | GPM2 | 6B | AX.89653439 | 6.71E+08 | 0.32 | -663.35 | 4.53 | 0.07 |
| E2 | TKW  | 6B | AX.89740335 | 3.27E+07 | 0.07 | -1.91   | 3.07 | 0.06 |
| E2 | TKW  | 6B | AX.89593900 | 9.40E+07 | 0.15 | -1.38   | 3.12 | 0.06 |
| E2 | GPM2 | 6B | AX.89521152 | 6.71E+08 | 0.31 | -602.64 | 3.82 | 0.06 |
| E2 | TKW  | 6B | AX.89438823 | 1.01E+08 | 0.17 | -1.34   | 3.22 | 0.06 |
| E2 | TKW  | 6B | AX.89378889 | 1.14E+08 | 0.15 | -1.53   | 3.74 | 0.07 |
| E2 | GPM2 | 6B | AX.89496535 | 6.68E+08 | 0.39 | -497.38 | 3.01 | 0.04 |
| E2 | GPS  | 6B | AX.89349314 | 6.60E+08 | 0.45 | 1.32    | 3.05 | 0.05 |
| E2 | GPS  | 6B | AX.89374842 | 4.41E+07 | 0.48 | -1.37   | 3.26 | 0.06 |
| E2 | GPS  | 6B | AX.89428683 | 6.79E+08 | 0.35 | 1.43    | 3.23 | 0.05 |

|    |      |    |             |          |      |         |      |      |
|----|------|----|-------------|----------|------|---------|------|------|
| E2 | GPM2 | 6B | AX.89568332 | 6.65E+08 | 0.43 | -504.00 | 3.13 | 0.06 |
| E2 | TKW  | 6B | AX.89769081 | 1.01E+08 | 0.15 | -1.41   | 3.15 | 0.06 |
| E2 | GPS  | 6B | AX.89663521 | 6.65E+08 | 0.46 | 1.50    | 3.77 | 0.06 |
| E2 | GPS  | 6B | AX.89449580 | 6.65E+08 | 0.46 | 1.48    | 3.70 | 0.06 |
| E2 | GPM2 | 6B | AX.89448461 | 6.65E+08 | 0.43 | -504.00 | 3.13 | 0.06 |
| E2 | TKW  | 6B | AX.89746313 | 1.14E+08 | 0.16 | -1.43   | 3.47 | 0.07 |
| E2 | GPS  | 6B | AX.89666072 | 6.64E+08 | 0.46 | 1.41    | 3.39 | 0.06 |
| E2 | TKW  | 6B | AX.89309543 | 9.97E+07 | 0.15 | -1.38   | 3.12 | 0.06 |
| E2 | GPS  | 6B | AX.89332019 | 4.74E+08 | 0.43 | 1.34    | 3.09 | 0.04 |
| E2 | GPM2 | 6B | AX.89324679 | 6.65E+08 | 0.43 | -504.00 | 3.13 | 0.06 |
| E2 | GPM2 | 6B | AX.89691169 | 6.65E+08 | 0.43 | -504.00 | 3.13 | 0.06 |
| E2 | GPS  | 6B | AX.89380836 | 6.83E+08 | 0.29 | -1.52   | 3.26 | 0.06 |
| E2 | GPS  | 6B | AX.89520467 | 2.32E+08 | 0.05 | -3.00   | 3.09 | 0.07 |
| E2 | TKW  | 6B | AX.89467761 | 1.13E+08 | 0.15 | -1.38   | 3.12 | 0.06 |
| E2 | TKW  | 6B | AX.89521152 | 6.71E+08 | 0.31 | 1.22    | 3.95 | 0.08 |
| E2 | TKW  | 6B | AX.89382096 | 9.97E+07 | 0.15 | -1.38   | 3.18 | 0.06 |
| E2 | GPS  | 6B | AX.89562354 | 6.94E+08 | 0.44 | -1.52   | 3.85 | 0.07 |
| E2 | GPS  | 6B | AX.89338776 | 4.74E+08 | 0.43 | 1.34    | 3.09 | 0.04 |
| E2 | GPS  | 6B | AX.89421987 | 4.74E+08 | 0.43 | 1.34    | 3.09 | 0.04 |
| E2 | GPM2 | 6B | AX.86168932 | 6.65E+08 | 0.43 | -504.00 | 3.13 | 0.06 |
| E2 | GPS  | 6B | AX.86165948 | 6.83E+08 | 0.28 | -1.48   | 3.06 | 0.05 |
| E2 | TKW  | 6B | AX.89653439 | 6.71E+08 | 0.32 | 1.22    | 3.96 | 0.08 |
| E2 | TKW  | 6B | AX.89526232 | 3.25E+07 | 0.40 | 1.11    | 3.67 | 0.07 |
| E2 | TKW  | 6B | AX.89334263 | 1.00E+08 | 0.15 | -1.38   | 3.12 | 0.06 |
| E2 | GPS  | 6B | AX.89541177 | 6.87E+08 | 0.31 | -1.55   | 3.50 | 0.06 |
| E2 | TKW  | 6B | AX.89436730 | 1.00E+08 | 0.15 | -1.38   | 3.12 | 0.06 |
| E2 | TKW  | 6B | AX.89421643 | 6.64E+08 | 0.36 | 1.12    | 3.60 | 0.08 |
| E2 | GPS  | 6B | AX.89511788 | 6.91E+08 | 0.41 | -1.36   | 3.15 | 0.06 |
| E2 | GPM2 | 6B | AX.89471658 | 6.84E+08 | 0.41 | -515.75 | 3.31 | 0.06 |
| E2 | TKW  | 6B | AX.89716617 | 9.39E+07 | 0.15 | -1.38   | 3.12 | 0.06 |
| E2 | GPM2 | 6B | AX.89578722 | 6.70E+08 | 0.31 | -602.64 | 3.82 | 0.06 |
| E2 | TKW  | 6B | AX.89745004 | 1.14E+08 | 0.14 | -1.47   | 3.30 | 0.06 |
| E2 | GPS  | 6B | AX.89664855 | 4.27E+07 | 0.47 | -1.43   | 3.50 | 0.07 |
| E2 | TKW  | 6B | AX.89512454 | 6.66E+08 | 0.37 | 1.11    | 3.57 | 0.08 |
| E2 | GPS  | 6B | AX.89569889 | 4.74E+08 | 0.43 | 1.34    | 3.09 | 0.04 |
| E2 | GPS  | 6B | AX.89489768 | 6.79E+08 | 0.37 | 1.44    | 3.34 | 0.05 |
| E2 | TKW  | 6B | AX.89556458 | 7.07E+08 | 0.14 | -1.45   | 3.15 | 0.06 |
| E2 | TKW  | 6B | AX.89447727 | 9.69E+07 | 0.15 | -1.38   | 3.12 | 0.06 |
| E2 | TKW  | 6B | AX.89648820 | 1.13E+08 | 0.15 | -1.38   | 3.12 | 0.06 |
| E2 | GPS  | 6B | AX.89385386 | 6.44E+08 | 0.15 | -1.87   | 3.19 | 0.05 |
| E2 | GPS  | 6B | AX.89469894 | 6.87E+08 | 0.31 | -1.57   | 3.60 | 0.06 |
| E2 | GPS  | 6B | AX.89393176 | 4.74E+08 | 0.43 | 1.34    | 3.09 | 0.04 |
| E2 | TKW  | 6B | AX.89531862 | 1.13E+08 | 0.15 | -1.38   | 3.12 | 0.06 |
| E2 | GPS  | 6B | AX.89558753 | 4.74E+08 | 0.43 | 1.34    | 3.09 | 0.04 |
| E2 | GPS  | 6B | AX.89392557 | 6.65E+08 | 0.46 | 1.48    | 3.70 | 0.06 |
| E2 | TKW  | 6B | AX.89496535 | 6.68E+08 | 0.39 | 1.01    | 3.11 | 0.06 |
| E2 | TKW  | 6B | AX.89335615 | 1.13E+08 | 0.15 | -1.38   | 3.12 | 0.06 |
| E2 | GPS  | 6B | AX.89501850 | 6.65E+08 | 0.46 | 1.48    | 3.70 | 0.06 |
| E2 | GPS  | 6B | AX.89488497 | 6.64E+08 | 0.37 | 1.66    | 4.27 | 0.07 |
| E2 | TKW  | 6B | AX.89571729 | 1.13E+08 | 0.15 | -1.38   | 3.12 | 0.06 |

|    |      |    |               |          |      |         |      |      |
|----|------|----|---------------|----------|------|---------|------|------|
| E2 | TKW  | 6B | AX.89503877   | 1.07E+08 | 0.15 | -1.38   | 3.12 | 0.06 |
| E2 | GPS  | 6B | AX.89542642   | 6.64E+08 | 0.46 | 1.45    | 3.56 | 0.06 |
| E2 | TKW  | 6B | AX.89672605   | 1.13E+08 | 0.15 | -1.38   | 3.12 | 0.06 |
| E2 | TKW  | 6B | AX.89433241   | 6.70E+08 | 0.31 | 1.22    | 3.95 | 0.08 |
| E3 | GPM2 | 6B | AX.89355088   | 1.36E+08 | 0.28 | 994.10  | 3.45 | 0.08 |
| E3 | GPM2 | 6B | AX.89682344   | 1.36E+08 | 0.28 | 994.10  | 3.45 | 0.08 |
| E3 | GPM2 | 6B | AX.89524481   | 1.41E+08 | 0.18 | 1127.41 | 3.08 | 0.08 |
| E3 | GPM2 | 6B | AX.89455872   | 1.45E+08 | 0.24 | 985.51  | 3.18 | 0.08 |
| E3 | GPM2 | 6B | AX.89497347   | 4.51E+08 | 0.11 | 1490.93 | 3.65 | 0.01 |
| E3 | GPM2 | 6B | AX.89412102   | 4.51E+08 | 0.11 | 1432.68 | 3.45 | 0.01 |
| E3 | GY   | 6B | AX.89455872   | 1.45E+08 | 0.24 | 3.22    | 3.05 | 0.07 |
| E3 | GY   | 6B | AX.89497347   | 4.51E+08 | 0.11 | 4.93    | 3.59 | 0.01 |
| E3 | GY   | 6B | AX.89412102   | 4.51E+08 | 0.11 | 4.55    | 3.16 | 0.00 |
| E3 | SPM2 | 6B | AX.89601903   | 5.24E+07 | 0.18 | -25.69  | 3.16 | 0.06 |
| E3 | SPM2 | 6B | AX.89497347   | 4.51E+08 | 0.08 | 36.13   | 3.25 | 0.04 |
| E3 | SPM2 | 6B | AX.89412102   | 4.51E+08 | 0.08 | 36.13   | 3.25 | 0.04 |
| E3 | SPM2 | 6B | AX.89403331   | 5.08E+08 | 0.07 | 42.37   | 3.73 | 0.06 |
| E3 | SPM2 | 6B | AX.89756640   | 7.14E+08 | 0.33 | 28.06   | 4.86 | 0.11 |
| E3 | SPM2 | 6B | AX.89773057   | 5.20E+07 | 0.18 | -25.49  | 3.10 | 0.06 |
| E3 | SPM2 | 6B | AX.89372971   | 5.20E+07 | 0.18 | -25.76  | 3.13 | 0.06 |
| E3 | SPM2 | 6B | X.89648081_OT | 5.22E+07 | 0.19 | -25.85  | 3.34 | 0.06 |
| E3 | SPM2 | 6B | X.89359127_OT | 5.22E+07 | 0.18 | -25.76  | 3.23 | 0.06 |
| E3 | SPM2 | 6B | AX.89709218   | 5.23E+07 | 0.18 | -26.75  | 3.39 | 0.06 |
| E3 | SPM2 | 6B | AX.89603387   | 5.23E+07 | 0.18 | -25.76  | 3.23 | 0.06 |
| E3 | SPM2 | 6B | AX.89372993   | 5.23E+07 | 0.18 | -25.76  | 3.23 | 0.06 |
| E3 | SPM2 | 6B | AX.89580813   | 5.23E+07 | 0.18 | -25.76  | 3.23 | 0.06 |
| E3 | SPM2 | 6B | AX.89560830   | 5.23E+07 | 0.18 | -25.76  | 3.23 | 0.06 |
| E3 | SPM2 | 6B | AX.89616345   | 5.23E+07 | 0.18 | -25.76  | 3.23 | 0.06 |
| E3 | SPM2 | 6B | AX.89579689   | 5.23E+07 | 0.18 | -25.76  | 3.23 | 0.06 |
| E3 | SPM2 | 6B | AX.89686356   | 5.24E+07 | 0.18 | -25.76  | 3.23 | 0.06 |
| E4 | GPM2 | 6B | AX.89429070   | 6.62E+08 | 0.22 | -533.51 | 3.11 | 0.02 |
| E4 | GPM2 | 6B | AX.89597650   | 6.62E+08 | 0.22 | -558.65 | 3.37 | 0.03 |
| E4 | GPM2 | 6B | X.89432769_OT | 6.62E+08 | 0.22 | -555.01 | 3.27 | 0.02 |
| E4 | GPS  | 6B | X.89409922_OT | 4.32E+08 | 0.05 | 3.24    | 3.15 | 0.04 |
| E4 | GY   | 6B | AX.89632096   | 1.86E+07 | 0.11 | -2.32   | 3.13 | 0.04 |
| E4 | GY   | 6B | AX.89766141   | 1.87E+07 | 0.10 | -2.36   | 3.16 | 0.04 |
| E4 | GY   | 6B | AX.89330905   | 1.87E+07 | 0.10 | -2.36   | 3.16 | 0.04 |
| E4 | GY   | 6B | AX.89443188   | 1.89E+07 | 0.42 | -1.63   | 3.77 | 0.06 |
| E4 | GY   | 6B | AX.89532455   | 1.92E+07 | 0.14 | -2.14   | 3.22 | 0.04 |
| E4 | GY   | 6B | AX.89720051   | 1.92E+07 | 0.14 | -2.14   | 3.22 | 0.04 |
| E4 | GY   | 6B | X.89499897_OT | 1.92E+07 | 0.13 | -2.22   | 3.37 | 0.05 |
| E4 | GY   | 6B | AX.89365823   | 1.98E+07 | 0.15 | -2.04   | 3.16 | 0.05 |
| E4 | GY   | 6B | X.89487057_OT | 7.13E+08 | 0.08 | -2.59   | 3.03 | 0.03 |
| E4 | SPM2 | 6B | AX.89712211   | 1.92E+07 | 0.14 | -23.53  | 3.30 | 0.03 |
| E4 | SPM2 | 6B | AX.89472341   | 2.00E+07 | 0.14 | -21.82  | 3.01 | 0.03 |
| E4 | SPM2 | 6B | AX.89550024   | 1.20E+08 | 0.36 | 17.50   | 3.15 | 0.05 |
| E4 | SPM2 | 6B | AX.89369178   | 1.20E+08 | 0.36 | 18.42   | 3.40 | 0.06 |
| E4 | SPM2 | 6B | AX.89323226   | 1.20E+08 | 0.36 | 17.99   | 3.26 | 0.05 |
| E4 | SPM2 | 6B | AX.89497402   | 1.20E+08 | 0.36 | 18.14   | 3.31 | 0.06 |
| E4 | SPM2 | 6B | AX.89748300   | 1.20E+08 | 0.37 | 17.22   | 3.12 | 0.05 |

|    |      |    |             |          |      |       |      |      |
|----|------|----|-------------|----------|------|-------|------|------|
| E4 | SPM2 | 6B | AX.89672794 | 1.20E+08 | 0.36 | 17.67 | 3.17 | 0.05 |
| E4 | SPM2 | 6B | AX.89357581 | 1.20E+08 | 0.36 | 17.67 | 3.17 | 0.05 |
| E4 | SPM2 | 6B | AX.89772989 | 1.20E+08 | 0.36 | 17.67 | 3.17 | 0.05 |
| E4 | SPM2 | 6B | AX.89540060 | 1.20E+08 | 0.36 | 18.14 | 3.31 | 0.06 |
| E4 | SPM2 | 6B | AX.89339906 | 1.20E+08 | 0.35 | 18.10 | 3.27 | 0.05 |
| E4 | SPM2 | 6B | AX.89343765 | 1.20E+08 | 0.35 | 18.10 | 3.27 | 0.05 |
| E4 | SPM2 | 6B | AX.89406775 | 1.20E+08 | 0.35 | 18.10 | 3.27 | 0.05 |
| E4 | SPM2 | 6B | AX.89602703 | 1.20E+08 | 0.36 | 17.75 | 3.19 | 0.05 |
| E4 | SPM2 | 6B | AX.89420193 | 1.21E+08 | 0.36 | 17.65 | 3.20 | 0.06 |
| E4 | SPM2 | 6B | AX.89355697 | 1.24E+08 | 0.12 | 29.81 | 3.89 | 0.09 |
| E4 | SPM2 | 6B | AX.89628267 | 1.24E+08 | 0.11 | 30.10 | 3.94 | 0.09 |
| E4 | SPM2 | 6B | AX.89481650 | 1.24E+08 | 0.11 | 30.10 | 3.94 | 0.09 |
| E4 | SPM2 | 6B | AX.89700249 | 1.24E+08 | 0.13 | 29.20 | 4.23 | 0.09 |
| E4 | SPM2 | 6B | AX.89410732 | 1.24E+08 | 0.12 | 28.84 | 3.88 | 0.09 |
| E4 | SPM2 | 6B | AX.89659601 | 1.24E+08 | 0.12 | 28.84 | 3.88 | 0.09 |
| E4 | SPM2 | 6B | AX.89508956 | 1.24E+08 | 0.13 | 35.94 | 6.08 | 0.13 |
| E4 | SPM2 | 6B | AX.89459468 | 1.24E+08 | 0.13 | 35.94 | 6.08 | 0.13 |
| E4 | SPM2 | 6B | AX.89329918 | 1.24E+08 | 0.11 | 35.80 | 5.55 | 0.12 |
| E4 | SPM2 | 6B | AX.89699961 | 1.25E+08 | 0.13 | 35.94 | 6.08 | 0.13 |
| E4 | SPM2 | 6B | AX.89650296 | 1.25E+08 | 0.13 | 35.94 | 6.08 | 0.13 |
| E4 | SPM2 | 6B | AX.89539688 | 1.25E+08 | 0.08 | 32.33 | 3.42 | 0.09 |
| E4 | SPM2 | 6B | AX.89650362 | 1.25E+08 | 0.12 | 35.47 | 5.41 | 0.12 |
| E4 | SPM2 | 6B | AX.89750622 | 2.05E+08 | 0.31 | 18.61 | 3.45 | 0.05 |
| E4 | SPM2 | 6B | AX.89433742 | 6.34E+08 | 0.25 | 19.65 | 3.20 | 0.08 |
| E4 | SPM2 | 6B | AX.89714678 | 6.34E+08 | 0.25 | 19.65 | 3.20 | 0.08 |
| E4 | SPM2 | 6B | AX.89392781 | 6.34E+08 | 0.25 | 19.65 | 3.20 | 0.08 |
| E4 | SPM2 | 6B | AX.89761729 | 6.34E+08 | 0.25 | 19.65 | 3.20 | 0.08 |
| E4 | SPM2 | 6B | AX.89699701 | 6.34E+08 | 0.25 | 19.65 | 3.20 | 0.08 |
| E4 | SPM2 | 6B | AX.89693483 | 6.34E+08 | 0.25 | 19.65 | 3.20 | 0.08 |
| E4 | SPM2 | 6B | AX.89719016 | 6.34E+08 | 0.25 | 19.65 | 3.20 | 0.08 |
| E4 | SPM2 | 6B | AX.89718939 | 6.34E+08 | 0.25 | 19.65 | 3.20 | 0.08 |
| E4 | SPM2 | 6B | AX.89773356 | 6.35E+08 | 0.25 | 19.65 | 3.20 | 0.08 |
| E4 | SPM2 | 6B | AX.89567047 | 6.35E+08 | 0.25 | 19.65 | 3.20 | 0.08 |
| E4 | SPM2 | 6B | AX.89698453 | 6.35E+08 | 0.25 | 19.65 | 3.20 | 0.08 |
| E4 | SPM2 | 6B | AX.89383586 | 6.35E+08 | 0.25 | 19.65 | 3.20 | 0.08 |
| E4 | SPM2 | 6B | AX.89672632 | 6.35E+08 | 0.25 | 19.66 | 3.23 | 0.08 |
| E4 | SPM2 | 6B | AX.89620111 | 6.35E+08 | 0.26 | 18.78 | 3.02 | 0.08 |
| E4 | SPM2 | 6B | AX.89481153 | 6.35E+08 | 0.26 | 18.78 | 3.02 | 0.08 |
| E4 | SPM2 | 6B | AX.89581581 | 6.35E+08 | 0.25 | 19.66 | 3.23 | 0.08 |
| E4 | SPM2 | 6B | AX.89737989 | 6.35E+08 | 0.26 | 18.78 | 3.02 | 0.08 |
| E4 | SPM2 | 6B | AX.89321681 | 6.35E+08 | 0.25 | 19.66 | 3.23 | 0.08 |
| E4 | SPM2 | 6B | AX.89473888 | 6.35E+08 | 0.25 | 19.66 | 3.23 | 0.08 |
| E4 | SPM2 | 6B | AX.89356651 | 6.35E+08 | 0.26 | 18.78 | 3.02 | 0.08 |
| E4 | SPM2 | 6B | AX.89664327 | 6.37E+08 | 0.27 | 19.20 | 3.11 | 0.08 |
| E4 | SPM2 | 6B | AX.89531414 | 6.40E+08 | 0.27 | 18.91 | 3.07 | 0.08 |
| E4 | SPM2 | 6B | AX.89663095 | 6.44E+08 | 0.25 | 19.37 | 3.10 | 0.08 |
| E4 | SPM2 | 6B | AX.89392016 | 6.44E+08 | 0.25 | 20.10 | 3.29 | 0.09 |
| E4 | SPM2 | 6B | AX.89594816 | 6.44E+08 | 0.25 | 19.41 | 3.17 | 0.09 |
| E4 | SPM2 | 6B | AX.89350676 | 6.44E+08 | 0.24 | 20.39 | 3.30 | 0.09 |
| E4 | SPM2 | 6B | AX.89719516 | 6.44E+08 | 0.23 | 20.29 | 3.18 | 0.09 |

|    |      |    |             |          |      |       |      |      |
|----|------|----|-------------|----------|------|-------|------|------|
| E4 | SPM2 | 6B | AX.89628229 | 6.44E+08 | 0.22 | 21.40 | 3.40 | 0.09 |
| E4 | SPM2 | 6B | AX.89644015 | 6.44E+08 | 0.23 | 20.29 | 3.18 | 0.09 |
| E4 | SPM2 | 6B | AX.89342893 | 6.44E+08 | 0.23 | 20.37 | 3.16 | 0.09 |
| E4 | SPM2 | 6B | AX.89541400 | 6.44E+08 | 0.22 | 20.68 | 3.25 | 0.09 |
| E4 | SPM2 | 6B | AX.89372156 | 6.44E+08 | 0.22 | 20.68 | 3.25 | 0.09 |
| E4 | SPM2 | 6B | AX.89636004 | 6.44E+08 | 0.23 | 22.13 | 3.72 | 0.10 |
| E4 | SPM2 | 6B | AX.89311528 | 6.44E+08 | 0.23 | 20.60 | 3.27 | 0.09 |
| E4 | SPM2 | 6B | AX.89691296 | 6.44E+08 | 0.23 | 20.60 | 3.27 | 0.09 |
| E4 | SPM2 | 6B | AX.89633074 | 6.44E+08 | 0.23 | 22.42 | 3.79 | 0.10 |
| E4 | SPM2 | 6B | AX.89328418 | 6.44E+08 | 0.23 | 22.42 | 3.79 | 0.10 |
| E4 | SPM2 | 6B | AX.89708698 | 6.44E+08 | 0.23 | 22.42 | 3.79 | 0.10 |
| E1 | SPM2 | 6D | AX.89776468 | 4.57E+08 | 0.35 | 17.24 | 3.09 | 0.06 |
| E1 | SPM2 | 6D | AX.89332731 | 4.57E+08 | 0.34 | 18.20 | 3.36 | 0.06 |
| E1 | SPM2 | 6D | AX.89662783 | 4.57E+08 | 0.35 | 17.12 | 3.07 | 0.06 |
| E1 | GY   | 6D | AX.89337772 | 3.26E+08 | 0.05 | -5.80 | 3.74 | 0.07 |
| E1 | SPM2 | 6D | AX.89623338 | 4.57E+08 | 0.35 | 17.24 | 3.09 | 0.06 |
| E1 | SPM2 | 6D | AX.89446230 | 4.57E+08 | 0.35 | 17.12 | 3.07 | 0.06 |
| E1 | GY   | 6D | AX.89315989 | 4.60E+08 | 0.30 | 2.46  | 3.03 | 0.05 |
| E1 | SPM2 | 6D | AX.89523086 | 4.57E+08 | 0.36 | 18.09 | 3.39 | 0.06 |
| E1 | GY   | 6D | AX.89380458 | 9.79E+07 | 0.07 | -5.08 | 3.62 | 0.07 |
| E1 | SPM2 | 6D | AX.89534983 | 4.57E+08 | 0.23 | 19.52 | 3.12 | 0.06 |
| E1 | SPM2 | 6D | AX.89713937 | 4.57E+08 | 0.35 | 17.24 | 3.09 | 0.06 |
| E1 | SPM2 | 6D | AX.89775608 | 4.59E+08 | 0.22 | 19.73 | 3.09 | 0.06 |
| E1 | GY   | 6D | AX.89380458 | 9.79E+07 | 0.07 | -5.08 | 3.62 | 0.07 |
| E1 | SPM2 | 6D | AX.89661747 | 4.57E+08 | 0.35 | 17.24 | 3.09 | 0.06 |
| E1 | SPM2 | 6D | AX.89748977 | 4.57E+08 | 0.36 | 17.61 | 3.26 | 0.06 |
| E1 | SPM2 | 6D | AX.89744758 | 4.58E+08 | 0.24 | 19.37 | 3.14 | 0.06 |
| E1 | GY   | 6D | AX.89757204 | 3.29E+08 | 0.05 | -5.64 | 3.30 | 0.06 |
| E1 | SPM2 | 6D | AX.89522782 | 4.58E+08 | 0.33 | 17.52 | 3.09 | 0.06 |
| E1 | GY   | 6D | AX.89351558 | 3.28E+08 | 0.05 | -5.80 | 3.74 | 0.07 |
| E1 | SPM2 | 6D | AX.89336925 | 4.58E+08 | 0.23 | 19.80 | 3.19 | 0.06 |
| E1 | SPM2 | 6D | AX.89323273 | 4.57E+08 | 0.24 | 20.74 | 3.54 | 0.06 |
| E1 | GY   | 6D | AX.89315989 | 4.60E+08 | 0.30 | 2.46  | 3.03 | 0.05 |
| E1 | GY   | 6D | AX.89523090 | 3.35E+08 | 0.05 | -5.80 | 3.74 | 0.07 |
| E1 | SPM2 | 6D | AX.89351003 | 4.57E+08 | 0.35 | 17.12 | 3.07 | 0.06 |
| E1 | SPM2 | 6D | AX.89681366 | 4.57E+08 | 0.35 | 17.24 | 3.09 | 0.06 |
| E1 | SPM2 | 6D | AX.89454903 | 4.57E+08 | 0.35 | 17.12 | 3.07 | 0.06 |
| E1 | GY   | 6D | AX.89523090 | 3.35E+08 | 0.05 | -5.80 | 3.74 | 0.07 |
| E1 | GY   | 6D | AX.89351558 | 3.28E+08 | 0.05 | -5.80 | 3.74 | 0.07 |
| E1 | SPM2 | 6D | AX.89488442 | 4.58E+08 | 0.26 | 18.89 | 3.15 | 0.06 |
| E1 | GY   | 6D | AX.89757204 | 3.29E+08 | 0.05 | -5.64 | 3.30 | 0.06 |
| E1 | SPM2 | 6D | AX.89490043 | 4.58E+08 | 0.23 | 21.24 | 3.61 | 0.07 |
| E1 | SPM2 | 6D | AX.89355985 | 4.57E+08 | 0.35 | 17.12 | 3.07 | 0.06 |
| E1 | GY   | 6D | AX.89484426 | 3.36E+08 | 0.05 | -5.80 | 3.74 | 0.07 |
| E1 | GY   | 6D | AX.89584641 | 3.46E+08 | 0.05 | -5.80 | 3.74 | 0.07 |
| E1 | SPM2 | 6D | AX.89390617 | 4.57E+08 | 0.35 | 17.16 | 3.09 | 0.06 |
| E1 | SPM2 | 6D | AX.89409271 | 4.57E+08 | 0.35 | 17.24 | 3.09 | 0.06 |
| E1 | SPM2 | 6D | AX.89361838 | 4.57E+08 | 0.35 | 17.24 | 3.09 | 0.06 |
| E1 | SPM2 | 6D | AX.89560134 | 4.57E+08 | 0.22 | 21.68 | 3.59 | 0.07 |
| E1 | SPM2 | 6D | AX.89776650 | 4.57E+08 | 0.35 | 17.24 | 3.09 | 0.06 |

|    |      |    |             |          |      |          |      |      |
|----|------|----|-------------|----------|------|----------|------|------|
| E1 | GY   | 6D | AX.89337772 | 3.26E+08 | 0.05 | -5.80    | 3.74 | 0.07 |
| E1 | GY   | 6D | AX.89560792 | 1.23E+08 | 0.05 | -5.79    | 3.74 | 0.06 |
| E1 | GY   | 6D | AX.89560792 | 1.23E+08 | 0.05 | -5.79    | 3.74 | 0.06 |
| E1 | GY   | 6D | AX.89484426 | 3.36E+08 | 0.05 | -5.80    | 3.74 | 0.07 |
| E1 | GPM2 | 6D | AX.89379693 | 8.56E+07 | 0.34 | -618.22  | 3.09 | 0.05 |
| E1 | GPM2 | 6D | AX.89655415 | 2.05E+08 | 0.10 | -1028.94 | 3.42 | 0.05 |
| E1 | GPM2 | 6D | AX.89479129 | 3.05E+06 | 0.12 | 1062.01  | 3.99 | 0.07 |
| E1 | GPM2 | 6D | AX.89366928 | 1.96E+08 | 0.18 | -819.47  | 3.50 | 0.06 |
| E1 | GPM2 | 6D | AX.89650556 | 1.40E+08 | 0.19 | -866.99  | 3.92 | 0.07 |
| E1 | GPM2 | 6D | AX.89313992 | 8.52E+07 | 0.36 | -600.50  | 3.00 | 0.05 |
| E1 | GPS  | 6D | AX.89479129 | 3.05E+06 | 0.12 | 2.06     | 4.22 | 0.07 |
| E1 | GY   | 6D | AX.89610816 | 9.78E+07 | 0.05 | -5.40    | 3.07 | 0.06 |
| E1 | GY   | 6D | AX.89610816 | 9.78E+07 | 0.05 | -5.40    | 3.07 | 0.06 |
| E1 | GPM2 | 6D | AX.89560792 | 1.23E+08 | 0.05 | -1333.06 | 3.09 | 0.05 |
| E1 | GPM2 | 6D | AX.89407176 | 1.43E+08 | 0.19 | -866.99  | 3.92 | 0.07 |
| E1 | GPM2 | 6D | AX.89351558 | 3.28E+08 | 0.05 | -1436.70 | 3.51 | 0.06 |
| E1 | GPM2 | 6D | AX.89652027 | 1.48E+08 | 0.10 | -1028.94 | 3.42 | 0.05 |
| E1 | GPM2 | 6D | AX.89424112 | 1.81E+08 | 0.18 | -819.47  | 3.50 | 0.06 |
| E1 | GPM2 | 6D | AX.89337772 | 3.26E+08 | 0.05 | -1436.70 | 3.51 | 0.06 |
| E1 | GPM2 | 6D | AX.89756935 | 1.61E+08 | 0.10 | -1028.94 | 3.42 | 0.05 |
| E1 | GPM2 | 6D | AX.89551296 | 8.73E+07 | 0.34 | -627.79  | 3.16 | 0.05 |
| E1 | GPM2 | 6D | AX.89640677 | 1.52E+08 | 0.10 | -1028.94 | 3.42 | 0.05 |
| E1 | GPM2 | 6D | AX.89496441 | 1.90E+08 | 0.10 | -1028.94 | 3.42 | 0.05 |
| E1 | GPM2 | 6D | AX.89493775 | 1.77E+08 | 0.10 | -1028.94 | 3.42 | 0.05 |
| E1 | GPM2 | 6D | AX.89725912 | 8.68E+07 | 0.34 | -633.97  | 3.21 | 0.05 |
| E1 | GPM2 | 6D | AX.89578323 | 8.84E+07 | 0.33 | -612.83  | 3.01 | 0.05 |
| E1 | GPM2 | 6D | AX.89692572 | 2.09E+08 | 0.10 | -1028.94 | 3.42 | 0.05 |
| E1 | GPM2 | 6D | AX.89695027 | 8.56E+07 | 0.36 | -600.50  | 3.00 | 0.05 |
| E1 | GPM2 | 6D | AX.89523090 | 3.35E+08 | 0.05 | -1436.70 | 3.51 | 0.06 |
| E1 | GPM2 | 6D | AX.89380458 | 9.79E+07 | 0.07 | -1338.57 | 3.78 | 0.07 |
| E1 | GPM2 | 6D | AX.89706862 | 2.63E+08 | 0.16 | -824.58  | 3.29 | 0.06 |
| E1 | GPM2 | 6D | AX.89468803 | 8.75E+07 | 0.34 | -618.04  | 3.09 | 0.05 |
| E1 | GPM2 | 6D | AX.89478543 | 2.05E+08 | 0.10 | -1028.94 | 3.42 | 0.05 |
| E1 | GPM2 | 6D | AX.89583904 | 2.18E+08 | 0.10 | -1028.94 | 3.42 | 0.05 |
| E1 | GPM2 | 6D | AX.89584641 | 3.46E+08 | 0.05 | -1436.70 | 3.51 | 0.06 |
| E1 | GPM2 | 6D | AX.89485933 | 1.74E+08 | 0.10 | -1028.94 | 3.42 | 0.05 |
| E1 | GY   | 6D | AX.89584641 | 3.46E+08 | 0.05 | -5.80    | 3.74 | 0.07 |
| E1 | GPM2 | 6D | AX.89333917 | 2.09E+08 | 0.10 | -1028.94 | 3.42 | 0.05 |
| E1 | GPM2 | 6D | AX.89359783 | 1.60E+08 | 0.10 | -1028.94 | 3.42 | 0.05 |
| E1 | GPM2 | 6D | AX.89484426 | 3.36E+08 | 0.05 | -1436.70 | 3.51 | 0.06 |
| E1 | GPM2 | 6D | AX.89562029 | 8.73E+07 | 0.33 | -626.86  | 3.13 | 0.05 |
| E2 | GY   | 6D | AX.89351558 | 3.28E+08 | 0.05 | -4.34    | 3.15 | 0.07 |
| E2 | GY   | 6D | AX.89399830 | 2.43E+06 | 0.14 | -2.87    | 3.29 | 0.03 |
| E2 | GY   | 6D | AX.89539764 | 2.43E+06 | 0.14 | -2.87    | 3.29 | 0.03 |
| E2 | GY   | 6D | AX.89560357 | 2.43E+06 | 0.14 | -2.70    | 3.05 | 0.03 |
| E2 | GY   | 6D | AX.89718621 | 2.44E+06 | 0.14 | -3.07    | 3.84 | 0.04 |
| E2 | GY   | 6D | AX.89718621 | 2.44E+06 | 0.14 | -3.07    | 3.84 | 0.04 |
| E2 | GY   | 6D | AX.89719214 | 2.42E+06 | 0.14 | -2.80    | 3.25 | 0.03 |
| E2 | GY   | 6D | AX.89637263 | 2.50E+06 | 0.14 | -2.87    | 3.29 | 0.03 |
| E2 | GY   | 6D | AX.89637263 | 2.50E+06 | 0.14 | -2.87    | 3.29 | 0.03 |



|    |      |    |             |          |      |          |      |      |
|----|------|----|-------------|----------|------|----------|------|------|
| E2 | GY   | 6D | AX.89442454 | 2.43E+06 | 0.15 | -2.64    | 3.01 | 0.03 |
| E2 | SPM2 | 6D | AX.89641175 | 4.65E+08 | 0.09 | 21.73    | 3.35 | 0.06 |
| E2 | SPM2 | 6D | AX.89771467 | 4.65E+08 | 0.15 | 19.64    | 4.16 | 0.07 |
| E2 | GPS  | 6D | AX.89351558 | 3.28E+08 | 0.05 | -3.14    | 3.32 | 0.07 |
| E2 | GY   | 6D | AX.89372070 | 2.49E+06 | 0.14 | -2.80    | 3.25 | 0.03 |
| E2 | GY   | 6D | AX.89337772 | 3.26E+08 | 0.05 | -4.34    | 3.15 | 0.07 |
| E2 | GY   | 6D | AX.89481312 | 2.48E+06 | 0.15 | -2.64    | 3.01 | 0.03 |
| E2 | GY   | 6D | AX.89586205 | 2.47E+06 | 0.14 | -2.80    | 3.25 | 0.03 |
| E2 | GY   | 6D | AX.89586205 | 2.47E+06 | 0.14 | -2.80    | 3.25 | 0.03 |
| E2 | GY   | 6D | AX.89775376 | 2.49E+06 | 0.14 | -2.80    | 3.25 | 0.03 |
| E2 | GY   | 6D | AX.89775376 | 2.49E+06 | 0.14 | -2.80    | 3.25 | 0.03 |
| E2 | GY   | 6D | AX.89560357 | 2.43E+06 | 0.14 | -2.70    | 3.05 | 0.03 |
| E2 | GY   | 6D | AX.89624623 | 9.99E+07 | 0.07 | -4.38    | 3.88 | 0.08 |
| E2 | GY   | 6D | AX.89624623 | 9.99E+07 | 0.07 | -4.38    | 3.88 | 0.08 |
| E2 | GPM2 | 6D | AX.89710620 | 1.17E+08 | 0.12 | -753.50  | 3.06 | 0.07 |
| E2 | GY   | 6D | AX.89414992 | 2.49E+06 | 0.15 | -2.64    | 3.01 | 0.03 |
| E2 | GY   | 6D | AX.89414992 | 2.49E+06 | 0.15 | -2.64    | 3.01 | 0.03 |
| E2 | GY   | 6D | AX.89614756 | 2.49E+06 | 0.14 | -2.80    | 3.25 | 0.03 |
| E2 | GY   | 6D | AX.89614756 | 2.49E+06 | 0.14 | -2.80    | 3.25 | 0.03 |
| E2 | GY   | 6D | AX.89748670 | 2.49E+06 | 0.14 | -2.87    | 3.29 | 0.03 |
| E2 | GY   | 6D | AX.89748670 | 2.49E+06 | 0.14 | -2.87    | 3.29 | 0.03 |
| E2 | GPM2 | 6D | AX.89380458 | 9.79E+07 | 0.07 | -1169.49 | 4.25 | 0.09 |
| E2 | GY   | 6D | AX.89380458 | 9.79E+07 | 0.07 | -5.29    | 5.44 | 0.11 |
| E2 | GY   | 6D | AX.89380458 | 9.79E+07 | 0.07 | -5.29    | 5.44 | 0.11 |
| E2 | GY   | 6D | AX.89523090 | 3.35E+08 | 0.05 | -4.34    | 3.15 | 0.07 |
| E2 | GY   | 6D | AX.89523090 | 3.35E+08 | 0.05 | -4.34    | 3.15 | 0.07 |
| E2 | GY   | 6D | AX.89312869 | 2.48E+06 | 0.14 | -2.80    | 3.25 | 0.03 |
| E2 | GY   | 6D | AX.89312869 | 2.48E+06 | 0.14 | -2.80    | 3.25 | 0.03 |
| E2 | GY   | 6D | AX.89313357 | 2.50E+06 | 0.14 | -2.71    | 3.07 | 0.03 |
| E2 | GY   | 6D | AX.89313357 | 2.50E+06 | 0.14 | -2.71    | 3.07 | 0.03 |
| E2 | GY   | 6D | AX.89382799 | 2.43E+06 | 0.13 | -3.18    | 3.85 | 0.04 |
| E2 | GY   | 6D | AX.89382799 | 2.43E+06 | 0.13 | -3.18    | 3.85 | 0.04 |
| E2 | GY   | 6D | AX.89490273 | 2.42E+06 | 0.15 | -2.67    | 3.13 | 0.06 |
| E2 | GY   | 6D | AX.89490273 | 2.42E+06 | 0.15 | -2.67    | 3.13 | 0.06 |
| E2 | GY   | 6D | AX.89619145 | 2.42E+06 | 0.14 | -2.80    | 3.25 | 0.03 |
| E2 | GY   | 6D | AX.89619145 | 2.42E+06 | 0.14 | -2.80    | 3.25 | 0.03 |
| E2 | GY   | 6D | AX.89454517 | 2.49E+06 | 0.15 | -2.64    | 3.01 | 0.03 |
| E2 | GY   | 6D | AX.89454517 | 2.49E+06 | 0.15 | -2.64    | 3.01 | 0.03 |
| E2 | GY   | 6D | AX.89778248 | 2.49E+06 | 0.15 | -2.64    | 3.01 | 0.03 |
| E2 | GY   | 6D | AX.89778248 | 2.49E+06 | 0.15 | -2.64    | 3.01 | 0.03 |
| E2 | GY   | 6D | AX.89657062 | 2.45E+06 | 0.14 | -2.80    | 3.25 | 0.03 |
| E2 | GY   | 6D | AX.89657062 | 2.45E+06 | 0.14 | -2.80    | 3.25 | 0.03 |
| E2 | GY   | 6D | AX.89538990 | 2.47E+06 | 0.13 | -3.18    | 3.85 | 0.04 |
| E2 | GY   | 6D | AX.89672765 | 2.49E+06 | 0.14 | -2.87    | 3.29 | 0.03 |
| E2 | GY   | 6D | AX.89672765 | 2.49E+06 | 0.14 | -2.87    | 3.29 | 0.03 |
| E2 | GPM2 | 6D | AX.89428596 | 9.09E+07 | 0.15 | -770.83  | 3.87 | 0.07 |
| E2 | GY   | 6D | AX.89389247 | 7.19E+06 | 0.43 | 2.09     | 3.58 | 0.05 |
| E2 | GY   | 6D | AX.89389247 | 7.19E+06 | 0.43 | 2.09     | 3.58 | 0.05 |
| E2 | GY   | 6D | AX.89626257 | 2.49E+06 | 0.14 | -2.80    | 3.25 | 0.03 |
| E2 | GY   | 6D | AX.89391510 | 2.45E+06 | 0.14 | -2.80    | 3.25 | 0.03 |

|    |      |    |             |          |      |          |      |      |
|----|------|----|-------------|----------|------|----------|------|------|
| E2 | GY   | 6D | AX.89391510 | 2.45E+06 | 0.14 | -2.80    | 3.25 | 0.03 |
| E2 | GY   | 6D | AX.89535290 | 2.47E+06 | 0.14 | -3.10    | 3.79 | 0.04 |
| E2 | GY   | 6D | AX.89535290 | 2.47E+06 | 0.14 | -3.10    | 3.79 | 0.04 |
| E2 | GY   | 6D | AX.89464601 | 2.50E+06 | 0.14 | -2.87    | 3.29 | 0.03 |
| E2 | GY   | 6D | AX.89464601 | 2.50E+06 | 0.14 | -2.87    | 3.29 | 0.03 |
| E2 | GY   | 6D | AX.89607698 | 2.47E+06 | 0.14 | -2.80    | 3.25 | 0.03 |
| E2 | GY   | 6D | AX.89607698 | 2.47E+06 | 0.14 | -2.80    | 3.25 | 0.03 |
| E2 | GY   | 6D | AX.89608316 | 2.43E+06 | 0.14 | -2.87    | 3.29 | 0.03 |
| E2 | GY   | 6D | AX.89608316 | 2.43E+06 | 0.14 | -2.87    | 3.29 | 0.03 |
| E2 | GY   | 6D | AX.89433283 | 2.50E+06 | 0.14 | -2.80    | 3.25 | 0.03 |
| E2 | GY   | 6D | AX.89433283 | 2.50E+06 | 0.14 | -2.80    | 3.25 | 0.03 |
| E2 | GY   | 6D | AX.89397880 | 2.42E+06 | 0.14 | -2.87    | 3.29 | 0.03 |
| E2 | GY   | 6D | AX.89397880 | 2.42E+06 | 0.14 | -2.87    | 3.29 | 0.03 |
| E2 | GY   | 6D | AX.89538990 | 2.47E+06 | 0.13 | -3.18    | 3.85 | 0.04 |
| E2 | GY   | 6D | AX.89351558 | 3.28E+08 | 0.05 | -4.34    | 3.15 | 0.07 |
| E2 | GY   | 6D | AX.89399830 | 2.43E+06 | 0.14 | -2.87    | 3.29 | 0.03 |
| E2 | GY   | 6D | AX.89539764 | 2.43E+06 | 0.14 | -2.87    | 3.29 | 0.03 |
| E2 | GY   | 6D | AX.89365404 | 2.50E+06 | 0.13 | -2.80    | 3.08 | 0.03 |
| E2 | GY   | 6D | AX.89365404 | 2.50E+06 | 0.13 | -2.80    | 3.08 | 0.03 |
| E2 | GPM2 | 6D | AX.89459659 | 9.72E+07 | 0.17 | -701.24  | 3.61 | 0.06 |
| E2 | GY   | 6D | AX.89719214 | 2.42E+06 | 0.14 | -2.80    | 3.25 | 0.03 |
| E2 | GY   | 6D | AX.89442454 | 2.43E+06 | 0.15 | -2.64    | 3.01 | 0.03 |
| E2 | GY   | 6D | AX.89626257 | 2.49E+06 | 0.14 | -2.80    | 3.25 | 0.03 |
| E2 | GY   | 6D | AX.89721743 | 2.42E+06 | 0.14 | -2.80    | 3.25 | 0.03 |
| E2 | GY   | 6D | AX.89721743 | 2.42E+06 | 0.14 | -2.80    | 3.25 | 0.03 |
| E2 | GPM2 | 6D | AX.89657963 | 9.72E+07 | 0.16 | -748.17  | 3.82 | 0.07 |
| E2 | GY   | 6D | AX.89372070 | 2.49E+06 | 0.14 | -2.80    | 3.25 | 0.03 |
| E2 | GY   | 6D | AX.89337772 | 3.26E+08 | 0.05 | -4.34    | 3.15 | 0.07 |
| E2 | GPS  | 6D | AX.89484426 | 3.36E+08 | 0.05 | -3.14    | 3.32 | 0.07 |
| E2 | GY   | 6D | AX.89481312 | 2.48E+06 | 0.15 | -2.64    | 3.01 | 0.03 |
| E2 | GPM2 | 6D | AX.89313751 | 1.09E+08 | 0.12 | -753.50  | 3.06 | 0.07 |
| E2 | GY   | 6D | AX.89761530 | 2.49E+06 | 0.14 | -2.80    | 3.25 | 0.03 |
| E2 | GY   | 6D | AX.89564244 | 2.50E+06 | 0.14 | -2.79    | 3.15 | 0.03 |
| E2 | GY   | 6D | AX.89484426 | 3.36E+08 | 0.05 | -4.34    | 3.15 | 0.07 |
| E2 | GY   | 6D | AX.89484426 | 3.36E+08 | 0.05 | -4.34    | 3.15 | 0.07 |
| E2 | GY   | 6D | AX.89705597 | 2.43E+06 | 0.14 | -2.80    | 3.25 | 0.03 |
| E2 | GY   | 6D | AX.89705597 | 2.43E+06 | 0.14 | -2.80    | 3.25 | 0.03 |
| E2 | GY   | 6D | AX.89701981 | 2.50E+06 | 0.14 | -2.80    | 3.25 | 0.03 |
| E2 | GY   | 6D | AX.89701981 | 2.50E+06 | 0.14 | -2.80    | 3.25 | 0.03 |
| E2 | GPS  | 6D | AX.89523090 | 3.35E+08 | 0.05 | -3.14    | 3.32 | 0.07 |
| E2 | GY   | 6D | AX.89584641 | 3.46E+08 | 0.05 | -4.34    | 3.15 | 0.07 |
| E2 | GY   | 6D | AX.89584641 | 3.46E+08 | 0.05 | -4.34    | 3.15 | 0.07 |
| E2 | TKW  | 6D | AX.89340531 | 4.38E+08 | 0.42 | 0.99     | 3.42 | 0.06 |
| E2 | GY   | 6D | AX.89761530 | 2.49E+06 | 0.14 | -2.80    | 3.25 | 0.03 |
| E2 | GY   | 6D | AX.89564244 | 2.50E+06 | 0.14 | -2.79    | 3.15 | 0.03 |
| E2 | GPM2 | 6D | AX.89624623 | 9.99E+07 | 0.07 | -1029.68 | 3.39 | 0.07 |
| E2 | GY   | 6D | AX.89531675 | 2.44E+06 | 0.15 | -2.75    | 3.22 | 0.03 |
| E2 | GY   | 6D | AX.89531675 | 2.44E+06 | 0.15 | -2.75    | 3.22 | 0.03 |
| E2 | GY   | 6D | AX.89478700 | 2.43E+06 | 0.14 | -2.87    | 3.29 | 0.03 |
| E2 | GY   | 6D | AX.89568442 | 2.44E+06 | 0.15 | -2.64    | 3.01 | 0.03 |

|    |      |    |               |          |      |         |      |      |
|----|------|----|---------------|----------|------|---------|------|------|
| E2 | GY   | 6D | AX.89568442   | 2.44E+06 | 0.15 | -2.64   | 3.01 | 0.03 |
| E2 | GPM2 | 6D | AX.89620167   | 1.15E+08 | 0.12 | -753.50 | 3.06 | 0.07 |
| E2 | GPS  | 6D | AX.89337772   | 3.26E+08 | 0.05 | -3.14   | 3.32 | 0.07 |
| E2 | GPS  | 6D | AX.89757204   | 3.29E+08 | 0.05 | -3.17   | 3.12 | 0.07 |
| E2 | GPS  | 6D | AX.89584641   | 3.46E+08 | 0.05 | -3.14   | 3.32 | 0.07 |
| E2 | GY   | 6D | AX.89478700   | 2.43E+06 | 0.14 | -2.87   | 3.29 | 0.03 |
| E2 | GPM2 | 6D | AX.89417270   | 1.04E+08 | 0.12 | -753.50 | 3.06 | 0.07 |
| E2 | GPM2 | 6D | AX.89477214   | 1.10E+08 | 0.12 | -753.50 | 3.06 | 0.07 |
| E2 | GPM2 | 6D | AX.89436776   | 1.14E+08 | 0.12 | -753.50 | 3.06 | 0.07 |
| E2 | GPM2 | 6D | AX.89393162   | 9.43E+07 | 0.17 | -701.24 | 3.61 | 0.06 |
| E3 | GPS  | 6D | AX.89563340   | 2.71E+08 | 0.30 | -2.79   | 3.63 | 0.09 |
| E3 | GPS  | 6D | AX.89460370   | 3.10E+08 | 0.29 | -2.75   | 3.60 | 0.09 |
| E3 | GPS  | 6D | AX.89337772   | 3.26E+08 | 0.31 | -2.37   | 3.11 | 0.09 |
| E3 | GPS  | 6D | AX.89455858   | 3.55E+08 | 0.32 | -2.31   | 3.12 | 0.09 |
| E3 | TKW  | 6D | AX.89710114   | 4.23E+08 | 0.35 | -0.95   | 3.33 | 0.11 |
| E3 | TKW  | 6D | AX.89694015   | 4.24E+08 | 0.33 | -0.92   | 3.10 | 0.10 |
| E3 | TKW  | 6D | AX.89531483   | 4.36E+08 | 0.29 | -0.93   | 3.32 | 0.08 |
| E3 | SPM2 | 6D | AX.89652981   | 4.70E+08 | 0.17 | 26.71   | 3.22 | 0.05 |
| E4 | GPS  | 6D | X.89700629_OT | 4.70E+08 | 0.20 | -1.88   | 3.07 | 0.06 |
| E4 | GY   | 6D | AX.89493553   | 1.04E+07 | 0.10 | -2.59   | 3.24 | 0.04 |
| E4 | GY   | 6D | AX.89536933   | 1.09E+07 | 0.21 | 1.81    | 3.06 | 0.02 |
| E4 | GPM2 | 6D | AX.89536933   | 1.09E+07 | 0.21 | 606.73  | 3.71 | 0.03 |
| E4 | SPM2 | 6D | AX.89397790   | 4.21E+08 | 0.24 | 20.50   | 3.04 | 0.08 |
| E4 | SPM2 | 6D | X.89700629_OT | 4.70E+08 | 0.20 | 21.98   | 3.41 | 0.07 |
| E4 | TKW  | 6D | AX.89424484   | 9.68E+07 | 0.49 | 1.13    | 4.58 | 0.13 |
| E4 | TKW  | 6D | AX.89459659   | 9.72E+07 | 0.43 | -0.96   | 3.30 | 0.10 |
| E4 | TKW  | 6D | AX.89657963   | 9.72E+07 | 0.46 | -0.91   | 3.20 | 0.10 |
| E4 | TKW  | 6D | AX.89710114   | 4.23E+08 | 0.35 | -1.17   | 4.88 | 0.14 |
| E4 | TKW  | 6D | AX.89694015   | 4.24E+08 | 0.33 | -1.11   | 4.34 | 0.12 |
| E4 | TKW  | 6D | AX.89347001   | 4.36E+08 | 0.24 | -1.00   | 3.23 | 0.07 |
| E4 | TKW  | 6D | AX.89428596   | 9.09E+07 | 0.49 | -1.08   | 4.11 | 0.14 |
| E4 | TKW  | 6D | AX.89393162   | 9.43E+07 | 0.42 | -1.05   | 3.84 | 0.11 |
| E4 | TKW  | 6D | AX.89659214   | 4.70E+07 | 0.11 | -1.45   | 3.96 | 0.07 |
| E1 | SPM2 | 7A | AX.89674449   | 8.52E+07 | 0.47 | -16.75  | 3.19 | 0.06 |
| E1 | SPM2 | 7A | AX.89365387   | 8.53E+07 | 0.48 | -18.52  | 3.80 | 0.07 |
| E1 | SPM2 | 7A | AX.89728059   | 8.53E+07 | 0.48 | -18.52  | 3.80 | 0.07 |
| E1 | SPM2 | 7A | AX.89750129   | 8.52E+07 | 0.47 | -16.61  | 3.15 | 0.06 |
| E1 | SPM2 | 7A | AX.89322489   | 8.52E+07 | 0.47 | -16.93  | 3.25 | 0.06 |
| E1 | GY   | 7A | AX.89413105   | 6.89E+08 | 0.24 | -2.63   | 3.05 | 0.04 |
| E1 | SPM2 | 7A | AX.89362135   | 8.53E+07 | 0.48 | -18.52  | 3.80 | 0.07 |
| E1 | GY   | 7A | AX.89695175   | 6.92E+08 | 0.17 | 3.08    | 3.17 | 0.04 |
| E1 | SPM2 | 7A | AX.89691294   | 8.53E+07 | 0.48 | -18.52  | 3.80 | 0.07 |
| E1 | GY   | 7A | AX.89407297   | 7.08E+08 | 0.36 | -2.41   | 3.19 | 0.06 |
| E1 | SPM2 | 7A | AX.89437917   | 8.53E+07 | 0.48 | -18.52  | 3.80 | 0.07 |
| E1 | SPM2 | 7A | AX.89427331   | 8.53E+07 | 0.48 | -18.52  | 3.80 | 0.07 |
| E1 | SPM2 | 7A | AX.89358546   | 8.51E+07 | 0.47 | -16.93  | 3.25 | 0.06 |
| E1 | SPM2 | 7A | AX.89389967   | 8.52E+07 | 0.47 | -16.93  | 3.25 | 0.06 |
| E1 | SPM2 | 7A | AX.89389117   | 8.53E+07 | 0.48 | -18.52  | 3.80 | 0.07 |
| E1 | SPM2 | 7A | AX.89310521   | 8.52E+07 | 0.47 | -16.93  | 3.25 | 0.06 |
| E1 | SPM2 | 7A | AX.89669240   | 8.51E+07 | 0.49 | 16.79   | 3.22 | 0.06 |

|    |      |    |             |          |      |        |      |      |
|----|------|----|-------------|----------|------|--------|------|------|
| E1 | SPM2 | 7A | AX.89767940 | 8.51E+07 | 0.49 | 16.54  | 3.13 | 0.06 |
| E1 | GY   | 7A | AX.89402422 | 7.09E+08 | 0.32 | -2.46  | 3.13 | 0.06 |
| E1 | SPM2 | 7A | AX.89477949 | 6.71E+08 | 0.14 | 24.02  | 3.24 | 0.06 |
| E1 | GY   | 7A | AX.89635020 | 6.92E+08 | 0.20 | 2.82   | 3.07 | 0.04 |
| E1 | SPM2 | 7A | AX.89496810 | 8.52E+07 | 0.47 | -16.93 | 3.25 | 0.06 |
| E1 | GY   | 7A | AX.89576529 | 6.72E+08 | 0.17 | -3.26  | 3.49 | 0.06 |
| E1 | SPM2 | 7A | AX.89571170 | 8.52E+07 | 0.47 | -16.93 | 3.25 | 0.06 |
| E1 | SPM2 | 7A | AX.89676739 | 8.53E+07 | 0.48 | -18.52 | 3.80 | 0.07 |
| E1 | GY   | 7A | AX.89338064 | 6.72E+08 | 0.15 | -3.40  | 3.53 | 0.06 |
| E1 | GY   | 7A | AX.89358168 | 7.09E+08 | 0.36 | -2.33  | 3.02 | 0.06 |
| E1 | SPM2 | 7A | AX.89766471 | 8.53E+07 | 0.48 | -18.52 | 3.80 | 0.07 |
| E1 | GY   | 7A | AX.89407297 | 7.08E+08 | 0.36 | -2.41  | 3.19 | 0.06 |
| E1 | SPM2 | 7A | AX.89525950 | 3.74E+07 | 0.45 | 16.42  | 3.06 | 0.06 |
| E1 | SPM2 | 7A | AX.89538956 | 8.52E+07 | 0.48 | -16.15 | 3.00 | 0.05 |
| E1 | GY   | 7A | AX.89635020 | 6.92E+08 | 0.20 | 2.82   | 3.07 | 0.04 |
| E1 | SPM2 | 7A | AX.89610935 | 8.53E+07 | 0.48 | -18.52 | 3.80 | 0.07 |
| E1 | SPM2 | 7A | AX.89561047 | 8.52E+07 | 0.47 | -16.93 | 3.25 | 0.06 |
| E1 | SPM2 | 7A | AX.89635468 | 8.54E+07 | 0.48 | -18.52 | 3.80 | 0.07 |
| E1 | GY   | 7A | AX.89695896 | 6.72E+08 | 0.17 | -3.30  | 3.63 | 0.06 |
| E1 | GY   | 7A | AX.89768981 | 6.72E+08 | 0.16 | -3.27  | 3.44 | 0.05 |
| E1 | SPM2 | 7A | AX.89416745 | 8.53E+07 | 0.48 | -18.52 | 3.80 | 0.07 |
| E1 | SPM2 | 7A | AX.89347005 | 8.52E+07 | 0.47 | -16.93 | 3.25 | 0.06 |
| E1 | SPM2 | 7A | AX.89342394 | 6.71E+08 | 0.14 | 24.02  | 3.24 | 0.06 |
| E1 | GY   | 7A | AX.89413105 | 6.89E+08 | 0.24 | -2.63  | 3.05 | 0.04 |
| E1 | GY   | 7A | AX.89338064 | 6.72E+08 | 0.15 | -3.40  | 3.53 | 0.06 |
| E1 | GY   | 7A | AX.89349756 | 6.72E+08 | 0.16 | -3.27  | 3.44 | 0.05 |
| E1 | SPM2 | 7A | AX.89535619 | 8.51E+07 | 0.48 | -16.74 | 3.19 | 0.06 |
| E1 | SPM2 | 7A | AX.89746781 | 8.53E+07 | 0.48 | -18.52 | 3.80 | 0.07 |
| E1 | SPM2 | 7A | AX.89632073 | 8.52E+07 | 0.47 | -16.61 | 3.15 | 0.06 |
| E1 | SPM2 | 7A | AX.89773032 | 8.53E+07 | 0.48 | -18.52 | 3.80 | 0.07 |
| E1 | SPM2 | 7A | AX.89533985 | 8.52E+07 | 0.47 | -16.93 | 3.25 | 0.06 |
| E1 | GY   | 7A | AX.89454617 | 6.90E+08 | 0.22 | 2.87   | 3.37 | 0.05 |
| E1 | GY   | 7A | AX.89455713 | 4.77E+07 | 0.07 | -5.38  | 4.05 | 0.06 |
| E1 | GY   | 7A | AX.89695175 | 6.92E+08 | 0.17 | 3.08   | 3.17 | 0.04 |
| E1 | GY   | 7A | AX.89411001 | 6.92E+08 | 0.19 | -3.79  | 4.96 | 0.09 |
| E1 | GY   | 7A | AX.89549505 | 1.77E+07 | 0.08 | -4.56  | 3.72 | 0.06 |
| E1 | GY   | 7A | AX.89683408 | 1.15E+08 | 0.26 | -2.55  | 3.00 | 0.06 |
| E1 | GY   | 7A | AX.89457417 | 6.92E+08 | 0.20 | -3.81  | 5.18 | 0.09 |
| E1 | GY   | 7A | AX.89702366 | 5.61E+06 | 0.11 | -3.90  | 3.43 | 0.05 |
| E1 | SPM2 | 7A | AX.89638466 | 8.52E+07 | 0.47 | -16.61 | 3.15 | 0.06 |
| E1 | SPM2 | 7A | AX.89547147 | 8.52E+07 | 0.47 | -17.71 | 3.51 | 0.06 |
| E1 | GY   | 7A | AX.89488417 | 6.72E+08 | 0.17 | -3.30  | 3.63 | 0.06 |
| E1 | GY   | 7A | AX.89488417 | 6.72E+08 | 0.17 | -3.30  | 3.63 | 0.06 |
| E1 | GY   | 7A | AX.89704060 | 1.81E+07 | 0.32 | -2.90  | 4.20 | 0.06 |
| E1 | GY   | 7A | AX.89596072 | 6.66E+08 | 0.41 | 2.56   | 3.71 | 0.06 |
| E1 | GY   | 7A | AX.89349756 | 6.72E+08 | 0.16 | -3.27  | 3.44 | 0.05 |
| E1 | GY   | 7A | AX.89754578 | 6.92E+08 | 0.21 | -4.24  | 6.45 | 0.12 |
| E1 | GY   | 7A | AX.89455713 | 4.77E+07 | 0.07 | -5.38  | 4.05 | 0.06 |
| E1 | SPM2 | 7A | AX.89549503 | 3.80E+07 | 0.23 | 20.47  | 3.33 | 0.06 |
| E1 | GY   | 7A | AX.89573163 | 6.91E+08 | 0.26 | 2.80   | 3.51 | 0.05 |

|    |      |    |             |          |      |        |      |      |
|----|------|----|-------------|----------|------|--------|------|------|
| E1 | GY   | 7A | AX.89411001 | 6.92E+08 | 0.19 | -3.79  | 4.96 | 0.09 |
| E1 | GY   | 7A | AX.89529147 | 6.89E+08 | 0.22 | 3.20   | 4.02 | 0.06 |
| E1 | GY   | 7A | AX.89683408 | 1.15E+08 | 0.26 | -2.55  | 3.00 | 0.06 |
| E1 | GY   | 7A | AX.89702366 | 5.61E+06 | 0.11 | -3.90  | 3.43 | 0.05 |
| E1 | SPM2 | 7A | AX.89651685 | 8.51E+07 | 0.49 | 16.79  | 3.22 | 0.06 |
| E1 | SPM2 | 7A | AX.89393785 | 8.53E+07 | 0.48 | -18.52 | 3.80 | 0.07 |
| E1 | SPM2 | 7A | AX.89698264 | 8.52E+07 | 0.47 | -16.93 | 3.25 | 0.06 |
| E1 | SPM2 | 7A | AX.89322222 | 4.75E+07 | 0.16 | 22.66  | 3.19 | 0.05 |
| E1 | GPS  | 7A | AX.89385994 | 5.89E+08 | 0.50 | 1.11   | 3.01 | 0.05 |
| E1 | GPS  | 7A | AX.89488888 | 5.95E+08 | 0.50 | 1.11   | 3.01 | 0.05 |
| E1 | GPS  | 7A | AX.89759797 | 5.93E+08 | 0.50 | 1.10   | 3.00 | 0.05 |
| E1 | GPS  | 7A | AX.89609381 | 5.85E+08 | 0.50 | 1.11   | 3.01 | 0.05 |
| E1 | GPS  | 7A | AX.89692801 | 5.93E+08 | 0.50 | 1.10   | 3.00 | 0.05 |
| E1 | GPS  | 7A | AX.89565548 | 5.90E+08 | 0.50 | 1.10   | 3.00 | 0.05 |
| E1 | GPS  | 7A | AX.89611613 | 5.94E+08 | 0.50 | 1.11   | 3.01 | 0.05 |
| E1 | GPS  | 7A | AX.89649407 | 5.93E+08 | 0.50 | 1.11   | 3.01 | 0.05 |
| E1 | SPM2 | 7A | AX.89416656 | 8.51E+07 | 0.49 | 16.79  | 3.22 | 0.06 |
| E1 | GPS  | 7A | AX.89448058 | 5.95E+08 | 0.50 | 1.10   | 3.00 | 0.05 |
| E1 | GY   | 7A | AX.89645723 | 7.32E+08 | 0.16 | -3.21  | 3.26 | 0.06 |
| E1 | GPS  | 7A | AX.89642256 | 5.94E+08 | 0.50 | 1.10   | 3.00 | 0.05 |
| E1 | GY   | 7A | AX.89768981 | 6.72E+08 | 0.16 | -3.27  | 3.44 | 0.05 |
| E1 | GPS  | 7A | AX.89720693 | 5.92E+08 | 0.50 | 1.10   | 3.00 | 0.05 |
| E1 | GY   | 7A | AX.89729033 | 6.90E+08 | 0.22 | 2.87   | 3.37 | 0.05 |
| E1 | GPS  | 7A | AX.89618387 | 5.88E+08 | 0.49 | 1.13   | 3.14 | 0.06 |
| E1 | GPS  | 7A | AX.89635830 | 5.85E+08 | 0.50 | 1.11   | 3.01 | 0.05 |
| E1 | GPS  | 7A | AX.89310981 | 5.94E+08 | 0.50 | 1.11   | 3.01 | 0.05 |
| E1 | GY   | 7A | AX.89514228 | 6.89E+08 | 0.33 | -2.38  | 3.05 | 0.04 |
| E1 | GPS  | 7A | AX.89660912 | 5.92E+08 | 0.50 | 1.10   | 3.00 | 0.05 |
| E1 | GPS  | 7A | AX.89605766 | 5.85E+08 | 0.50 | 1.11   | 3.01 | 0.05 |
| E1 | GPS  | 7A | AX.89777023 | 5.93E+08 | 0.50 | 1.10   | 3.00 | 0.05 |
| E1 | GPS  | 7A | AX.89725593 | 5.87E+08 | 0.50 | 1.11   | 3.01 | 0.05 |
| E1 | GPS  | 7A | AX.89637946 | 5.94E+08 | 0.50 | 1.11   | 3.01 | 0.05 |
| E1 | GPS  | 7A | AX.89685614 | 5.93E+08 | 0.50 | 1.10   | 3.00 | 0.05 |
| E1 | GPS  | 7A | AX.89713730 | 5.84E+08 | 0.50 | 1.10   | 3.00 | 0.05 |
| E1 | GY   | 7A | AX.89402422 | 7.09E+08 | 0.32 | -2.46  | 3.13 | 0.06 |
| E1 | SPM2 | 7A | AX.89536189 | 8.52E+07 | 0.47 | -16.93 | 3.25 | 0.06 |
| E1 | GPS  | 7A | AX.89646568 | 5.85E+08 | 0.50 | 1.11   | 3.01 | 0.05 |
| E1 | GPS  | 7A | AX.89497203 | 5.87E+08 | 0.50 | 1.11   | 3.01 | 0.05 |
| E1 | GPS  | 7A | AX.89694425 | 5.94E+08 | 0.50 | 1.11   | 3.01 | 0.05 |
| E1 | GPS  | 7A | AX.89672574 | 5.89E+08 | 0.50 | 1.11   | 3.01 | 0.05 |
| E1 | GPS  | 7A | AX.89515454 | 5.94E+08 | 0.50 | 1.10   | 3.00 | 0.05 |
| E1 | GPS  | 7A | AX.89753909 | 5.90E+08 | 0.50 | 1.11   | 3.01 | 0.05 |
| E1 | GPS  | 7A | AX.89443688 | 5.85E+08 | 0.50 | 1.11   | 3.01 | 0.05 |
| E1 | GPS  | 7A | AX.89349805 | 5.93E+08 | 0.50 | 1.10   | 3.00 | 0.05 |
| E1 | GPS  | 7A | AX.89332530 | 5.95E+08 | 0.50 | 1.11   | 3.01 | 0.05 |
| E1 | GPS  | 7A | AX.89545465 | 5.92E+08 | 0.50 | 1.11   | 3.01 | 0.05 |
| E1 | GPS  | 7A | AX.89734645 | 5.92E+08 | 0.50 | 1.10   | 3.00 | 0.05 |
| E1 | GPS  | 7A | AX.89429431 | 5.90E+08 | 0.50 | 1.10   | 3.00 | 0.05 |
| E1 | GY   | 7A | AX.89704060 | 1.81E+07 | 0.32 | -2.90  | 4.20 | 0.06 |
| E1 | GY   | 7A | AX.89704079 | 2.99E+07 | 0.50 | -2.43  | 3.47 | 0.05 |

|    |      |    |             |          |      |         |      |      |
|----|------|----|-------------|----------|------|---------|------|------|
| E1 | GPS  | 7A | AX.89351303 | 5.94E+08 | 0.50 | 1.11    | 3.01 | 0.05 |
| E1 | GPS  | 7A | AX.89365193 | 5.94E+08 | 0.50 | 1.11    | 3.01 | 0.05 |
| E1 | GPS  | 7A | AX.89451083 | 5.94E+08 | 0.50 | 1.11    | 3.01 | 0.05 |
| E1 | GPS  | 7A | AX.89516497 | 5.94E+08 | 0.50 | 1.11    | 3.01 | 0.05 |
| E1 | GY   | 7A | AX.89596072 | 6.66E+08 | 0.41 | 2.56    | 3.71 | 0.06 |
| E1 | GY   | 7A | AX.89495797 | 6.72E+08 | 0.17 | -3.30   | 3.63 | 0.06 |
| E1 | GPS  | 7A | AX.89716275 | 5.95E+08 | 0.50 | 1.10    | 3.00 | 0.05 |
| E1 | GPS  | 7A | AX.89745144 | 5.89E+08 | 0.50 | 1.11    | 3.01 | 0.05 |
| E1 | GY   | 7A | AX.89529147 | 6.89E+08 | 0.22 | 3.20    | 4.02 | 0.06 |
| E1 | GY   | 7A | AX.89729033 | 6.90E+08 | 0.22 | 2.87    | 3.37 | 0.05 |
| E1 | GPS  | 7A | AX.89699633 | 5.89E+08 | 0.50 | 1.10    | 3.00 | 0.05 |
| E1 | GY   | 7A | AX.89514228 | 6.89E+08 | 0.33 | -2.38   | 3.05 | 0.04 |
| E1 | GPS  | 7A | AX.89544267 | 5.94E+08 | 0.50 | 1.11    | 3.01 | 0.05 |
| E1 | GY   | 7A | AX.89354261 | 6.89E+08 | 0.26 | -2.78   | 3.50 | 0.05 |
| E1 | GY   | 7A | AX.89354261 | 6.89E+08 | 0.26 | -2.78   | 3.50 | 0.05 |
| E1 | GY   | 7A | AX.89650018 | 7.08E+08 | 0.36 | -2.55   | 3.53 | 0.07 |
| E1 | GPS  | 7A | AX.89757807 | 5.84E+08 | 0.50 | 1.11    | 3.01 | 0.05 |
| E1 | GY   | 7A | AX.89358168 | 7.09E+08 | 0.36 | -2.33   | 3.02 | 0.06 |
| E1 | GY   | 7A | AX.89614349 | 6.72E+08 | 0.20 | -3.36   | 4.20 | 0.07 |
| E1 | GY   | 7A | AX.89454617 | 6.90E+08 | 0.22 | 2.87    | 3.37 | 0.05 |
| E1 | GY   | 7A | AX.89754578 | 6.92E+08 | 0.21 | -4.24   | 6.45 | 0.12 |
| E1 | GY   | 7A | AX.89734863 | 6.72E+08 | 0.17 | -3.30   | 3.63 | 0.06 |
| E1 | GY   | 7A | AX.89576529 | 6.72E+08 | 0.17 | -3.26   | 3.49 | 0.06 |
| E1 | SPM2 | 7A | AX.89667694 | 8.53E+07 | 0.48 | -18.52  | 3.80 | 0.07 |
| E1 | GPM2 | 7A | AX.89394325 | 2.33E+07 | 0.43 | -591.75 | 3.08 | 0.05 |
| E1 | GPS  | 7A | AX.89706161 | 5.95E+08 | 0.50 | 1.11    | 3.01 | 0.05 |
| E1 | GY   | 7A | AX.89549505 | 1.77E+07 | 0.08 | -4.56   | 3.72 | 0.06 |
| E1 | GY   | 7A | AX.89614349 | 6.72E+08 | 0.20 | -3.36   | 4.20 | 0.07 |
| E1 | GPM2 | 7A | AX.89529147 | 6.89E+08 | 0.22 | 747.75  | 3.37 | 0.05 |
| E1 | GPS  | 7A | AX.89750175 | 5.89E+08 | 0.50 | 1.10    | 3.00 | 0.05 |
| E1 | GPS  | 7A | AX.89551470 | 5.94E+08 | 0.50 | 1.11    | 3.01 | 0.05 |
| E1 | GPS  | 7A | AX.89720788 | 5.90E+08 | 0.50 | 1.11    | 3.01 | 0.05 |
| E1 | GY   | 7A | AX.89655850 | 4.77E+07 | 0.07 | -5.38   | 4.05 | 0.06 |
| E1 | GPS  | 7A | AX.89330229 | 5.93E+08 | 0.50 | 1.10    | 3.00 | 0.05 |
| E1 | GPS  | 7A | AX.89679799 | 5.84E+08 | 0.50 | 1.11    | 3.01 | 0.05 |
| E1 | GPS  | 7A | AX.89597433 | 5.95E+08 | 0.50 | 1.11    | 3.01 | 0.05 |
| E1 | GY   | 7A | AX.89548753 | 6.72E+08 | 0.18 | -3.01   | 3.16 | 0.05 |
| E1 | GY   | 7A | AX.89548753 | 6.72E+08 | 0.18 | -3.01   | 3.16 | 0.05 |
| E1 | GPS  | 7A | AX.89710877 | 5.95E+08 | 0.50 | 1.10    | 3.00 | 0.05 |
| E1 | GPS  | 7A | AX.89353390 | 5.94E+08 | 0.50 | 1.11    | 3.01 | 0.05 |
| E1 | GPS  | 7A | AX.89486315 | 5.84E+08 | 0.50 | 1.11    | 3.01 | 0.05 |
| E1 | GPS  | 7A | AX.89369950 | 5.87E+08 | 0.49 | 1.13    | 3.14 | 0.06 |
| E1 | GPS  | 7A | AX.89388880 | 5.93E+08 | 0.50 | 1.10    | 3.00 | 0.05 |
| E1 | GPS  | 7A | AX.89351810 | 5.94E+08 | 0.50 | 1.11    | 3.01 | 0.05 |
| E1 | GY   | 7A | AX.89695896 | 6.72E+08 | 0.17 | -3.30   | 3.63 | 0.06 |
| E1 | GPS  | 7A | AX.89600212 | 5.90E+08 | 0.50 | 1.11    | 3.01 | 0.05 |
| E1 | GPS  | 7A | AX.89642992 | 5.92E+08 | 0.50 | 1.10    | 3.00 | 0.05 |
| E1 | GPS  | 7A | AX.89635005 | 5.84E+08 | 0.50 | 1.11    | 3.01 | 0.05 |
| E1 | GPS  | 7A | AX.89563942 | 5.92E+08 | 0.50 | 1.10    | 3.00 | 0.05 |
| E1 | GPS  | 7A | AX.89698062 | 5.94E+08 | 0.50 | 1.11    | 3.01 | 0.05 |

|    |      |    |             |          |      |          |      |      |
|----|------|----|-------------|----------|------|----------|------|------|
| E1 | GPS  | 7A | AX.89310664 | 5.94E+08 | 0.50 | 1.11     | 3.01 | 0.05 |
| E1 | GPS  | 7A | AX.89445589 | 5.84E+08 | 0.50 | 1.11     | 3.01 | 0.05 |
| E1 | GPS  | 7A | AX.89592062 | 5.93E+08 | 0.50 | 1.10     | 3.00 | 0.05 |
| E1 | GPS  | 7A | AX.89732799 | 5.93E+08 | 0.50 | 1.10     | 3.00 | 0.05 |
| E1 | GPS  | 7A | AX.89506490 | 5.85E+08 | 0.50 | 1.11     | 3.01 | 0.05 |
| E1 | GPS  | 7A | AX.89371382 | 5.94E+08 | 0.50 | 1.11     | 3.01 | 0.05 |
| E1 | GPS  | 7A | AX.89384576 | 5.90E+08 | 0.50 | 1.10     | 3.00 | 0.05 |
| E1 | GPM2 | 7A | AX.89691734 | 6.89E+08 | 0.22 | 747.75   | 3.37 | 0.05 |
| E1 | GPM2 | 7A | AX.89411001 | 6.92E+08 | 0.19 | -859.96  | 3.93 | 0.07 |
| E1 | GPS  | 7A | AX.89644599 | 5.89E+08 | 0.50 | 1.11     | 3.01 | 0.05 |
| E1 | GPM2 | 7A | AX.89573163 | 6.91E+08 | 0.26 | 742.16   | 3.66 | 0.06 |
| E1 | GPS  | 7A | AX.89396521 | 5.93E+08 | 0.50 | 1.10     | 3.00 | 0.05 |
| E1 | GPS  | 7A | AX.89774333 | 5.86E+08 | 0.50 | 1.11     | 3.01 | 0.05 |
| E1 | GPM2 | 7A | AX.89704060 | 1.81E+07 | 0.32 | -841.40  | 5.13 | 0.08 |
| E1 | GPS  | 7A | AX.89720748 | 5.94E+08 | 0.50 | 1.11     | 3.01 | 0.05 |
| E1 | GPM2 | 7A | AX.89457417 | 6.92E+08 | 0.20 | -892.45  | 4.33 | 0.08 |
| E1 | GPS  | 7A | AX.89497669 | 5.94E+08 | 0.50 | 1.11     | 3.01 | 0.05 |
| E1 | GPS  | 7A | AX.89352041 | 5.95E+08 | 0.50 | 1.10     | 3.00 | 0.05 |
| E1 | GPS  | 7A | AX.89386099 | 5.85E+08 | 0.50 | 1.11     | 3.01 | 0.05 |
| E1 | GPS  | 7A | AX.89542688 | 5.92E+08 | 0.50 | 1.10     | 3.00 | 0.05 |
| E1 | GPM2 | 7A | AX.89383516 | 4.76E+07 | 0.09 | -1032.22 | 3.08 | 0.05 |
| E1 | GPS  | 7A | AX.89660197 | 5.95E+08 | 0.46 | 1.20     | 3.43 | 0.06 |
| E1 | GPS  | 7A | AX.89374905 | 5.89E+08 | 0.50 | 1.11     | 3.01 | 0.05 |
| E1 | GPS  | 7A | AX.89658409 | 5.92E+08 | 0.50 | 1.10     | 3.00 | 0.05 |
| E1 | GPS  | 7A | AX.89346636 | 5.93E+08 | 0.50 | 1.10     | 3.00 | 0.05 |
| E1 | GY   | 7A | AX.89704079 | 2.99E+07 | 0.50 | -2.43    | 3.47 | 0.05 |
| E1 | GPS  | 7A | AX.89362841 | 5.89E+08 | 0.50 | 1.11     | 3.01 | 0.05 |
| E1 | GPS  | 7A | AX.89767265 | 5.94E+08 | 0.50 | 1.10     | 3.00 | 0.05 |
| E1 | GPM2 | 7A | AX.89664843 | 1.53E+08 | 0.23 | 694.99   | 3.05 | 0.05 |
| E1 | GY   | 7A | AX.89495797 | 6.72E+08 | 0.17 | -3.30    | 3.63 | 0.06 |
| E1 | GPS  | 7A | AX.89667879 | 5.95E+08 | 0.50 | 1.10     | 3.00 | 0.05 |
| E1 | GPM2 | 7A | AX.89409314 | 1.48E+08 | 0.35 | 702.91   | 3.88 | 0.07 |
| E1 | GPM2 | 7A | AX.89455713 | 4.77E+07 | 0.07 | -1248.87 | 3.36 | 0.05 |
| E1 | GY   | 7A | AX.89457417 | 6.92E+08 | 0.20 | -3.81    | 5.18 | 0.09 |
| E1 | GPM2 | 7A | AX.89655850 | 4.77E+07 | 0.07 | -1248.87 | 3.36 | 0.05 |
| E1 | GY   | 7A | AX.89650018 | 7.08E+08 | 0.36 | -2.55    | 3.53 | 0.07 |
| E1 | GPS  | 7A | AX.89766240 | 5.85E+08 | 0.50 | 1.11     | 3.01 | 0.05 |
| E1 | GY   | 7A | AX.89573163 | 6.91E+08 | 0.26 | 2.80     | 3.51 | 0.05 |
| E1 | GY   | 7A | AX.89691734 | 6.89E+08 | 0.22 | 3.20     | 4.02 | 0.06 |
| E1 | GY   | 7A | AX.89691734 | 6.89E+08 | 0.22 | 3.20     | 4.02 | 0.06 |
| E1 | GY   | 7A | AX.89734863 | 6.72E+08 | 0.17 | -3.30    | 3.63 | 0.06 |
| E1 | GPM2 | 7A | AX.89512492 | 1.51E+08 | 0.34 | 696.43   | 3.77 | 0.07 |
| E1 | GPM2 | 7A | AX.89313296 | 6.80E+08 | 0.43 | 601.38   | 3.16 | 0.05 |
| E1 | GPM2 | 7A | AX.89754578 | 6.92E+08 | 0.21 | -876.73  | 4.32 | 0.08 |
| E1 | GPS  | 7A | AX.89576658 | 5.89E+08 | 0.50 | 1.11     | 3.01 | 0.05 |
| E1 | GPS  | 7A | AX.89422707 | 5.90E+08 | 0.50 | 1.11     | 3.01 | 0.05 |
| E1 | GPM2 | 7A | AX.89722852 | 2.00E+07 | 0.23 | -696.20  | 3.10 | 0.05 |
| E1 | GY   | 7A | AX.89655850 | 4.77E+07 | 0.07 | -5.38    | 4.05 | 0.06 |
| E1 | GPS  | 7A | AX.89730860 | 5.87E+08 | 0.50 | 1.11     | 3.01 | 0.05 |
| E1 | GPS  | 7A | AX.89386665 | 5.94E+08 | 0.50 | 1.11     | 3.01 | 0.05 |

|    |      |    |             |          |      |        |      |      |
|----|------|----|-------------|----------|------|--------|------|------|
| E1 | GPS  | 7A | AX.89482517 | 5.95E+08 | 0.50 | 1.11   | 3.01 | 0.05 |
| E1 | GPS  | 7A | AX.89735190 | 5.89E+08 | 0.50 | 1.11   | 3.01 | 0.05 |
| E1 | GPS  | 7A | AX.89339548 | 5.92E+08 | 0.50 | 1.10   | 3.00 | 0.05 |
| E1 | GY   | 7A | AX.89645723 | 7.32E+08 | 0.16 | -3.21  | 3.26 | 0.06 |
| E1 | GPS  | 7A | AX.89311431 | 5.94E+08 | 0.50 | 1.10   | 3.00 | 0.05 |
| E1 | GPM2 | 7A | AX.89391268 | 1.76E+08 | 0.31 | 672.08 | 3.39 | 0.06 |
| E1 | GPM2 | 7A | AX.89440082 | 1.87E+08 | 0.31 | 672.08 | 3.39 | 0.06 |
| E1 | GPS  | 7A | AX.89398740 | 5.85E+08 | 0.50 | 1.11   | 3.01 | 0.05 |
| E1 | GPS  | 7A | AX.89590533 | 5.95E+08 | 0.50 | 1.11   | 3.01 | 0.05 |
| E1 | GPS  | 7A | AX.89690732 | 5.89E+08 | 0.50 | 1.11   | 3.01 | 0.05 |
| E1 | GPS  | 7A | AX.89395568 | 5.92E+08 | 0.50 | 1.10   | 3.00 | 0.05 |
| E1 | TKW  | 7A | AX.89392964 | 1.64E+08 | 0.11 | -1.50  | 3.78 | 0.06 |
| E1 | TKW  | 7A | AX.89357487 | 1.76E+08 | 0.10 | -1.37  | 3.00 | 0.05 |
| E1 | TKW  | 7A | AX.89775856 | 1.56E+08 | 0.11 | -1.50  | 3.78 | 0.06 |
| E1 | TKW  | 7A | AX.89747316 | 1.43E+08 | 0.11 | -1.50  | 3.78 | 0.06 |
| E1 | TKW  | 7A | AX.89644863 | 1.30E+08 | 0.12 | -1.53  | 4.01 | 0.07 |
| E1 | TKW  | 7A | AX.89660702 | 1.56E+08 | 0.10 | -1.43  | 3.25 | 0.05 |
| E1 | TKW  | 7A | AX.89506329 | 9.31E+07 | 0.14 | -1.56  | 4.76 | 0.08 |
| E1 | TKW  | 7A | AX.89467570 | 1.36E+08 | 0.12 | -1.53  | 4.01 | 0.07 |
| E1 | TKW  | 7A | AX.89530390 | 1.66E+08 | 0.11 | -1.50  | 3.78 | 0.06 |
| E1 | TKW  | 7A | AX.89456654 | 1.36E+08 | 0.11 | -1.41  | 3.37 | 0.06 |
| E1 | GPS  | 7A | AX.89422146 | 5.84E+08 | 0.50 | 1.20   | 3.46 | 0.06 |
| E1 | TKW  | 7A | AX.89405523 | 1.67E+08 | 0.11 | -1.50  | 3.78 | 0.06 |
| E1 | TKW  | 7A | AX.89764069 | 1.46E+08 | 0.11 | -1.38  | 3.15 | 0.05 |
| E1 | TKW  | 7A | AX.89658297 | 1.54E+08 | 0.10 | -1.44  | 3.19 | 0.05 |
| E1 | TKW  | 7A | AX.89493315 | 1.44E+08 | 0.11 | -1.50  | 3.78 | 0.06 |
| E1 | TKW  | 7A | AX.89436797 | 1.54E+08 | 0.10 | -1.43  | 3.25 | 0.05 |
| E1 | TKW  | 7A | AX.89485213 | 1.48E+08 | 0.11 | -1.50  | 3.78 | 0.06 |
| E1 | TKW  | 7A | AX.89643651 | 1.53E+08 | 0.10 | -1.43  | 3.25 | 0.05 |
| E1 | TKW  | 7A | AX.89767696 | 9.31E+07 | 0.14 | -1.56  | 4.76 | 0.08 |
| E1 | TKW  | 7A | AX.89653836 | 1.30E+08 | 0.11 | -1.46  | 3.48 | 0.06 |
| E1 | TKW  | 7A | AX.89336191 | 1.30E+08 | 0.11 | -1.48  | 3.69 | 0.07 |
| E1 | TKW  | 7A | AX.89371906 | 1.76E+08 | 0.10 | -1.37  | 3.00 | 0.05 |
| E1 | TKW  | 7A | AX.89366109 | 1.62E+08 | 0.11 | -1.50  | 3.78 | 0.06 |
| E1 | TKW  | 7A | AX.89610878 | 1.61E+08 | 0.10 | -1.43  | 3.25 | 0.05 |
| E1 | TKW  | 7A | AX.86163580 | 1.65E+08 | 0.11 | -1.50  | 3.78 | 0.06 |
| E1 | TKW  | 7A | AX.89754400 | 1.56E+08 | 0.11 | -1.50  | 3.78 | 0.06 |
| E1 | TKW  | 7A | AX.89374540 | 1.58E+08 | 0.11 | -1.50  | 3.78 | 0.06 |
| E1 | TKW  | 7A | AX.89526473 | 1.45E+08 | 0.10 | -1.44  | 3.29 | 0.05 |
| E1 | TKW  | 7A | AX.89315701 | 1.76E+08 | 0.11 | -1.50  | 3.63 | 0.06 |
| E1 | TKW  | 7A | AX.89375093 | 1.51E+08 | 0.11 | -1.56  | 3.90 | 0.07 |
| E1 | TKW  | 7A | AX.89731899 | 1.69E+08 | 0.11 | -1.56  | 3.90 | 0.07 |
| E1 | TKW  | 7A | AX.89521547 | 1.51E+08 | 0.10 | -1.43  | 3.25 | 0.05 |
| E1 | TKW  | 7A | AX.89738373 | 1.69E+08 | 0.11 | -1.56  | 3.90 | 0.07 |
| E1 | TKW  | 7A | AX.89388443 | 1.63E+08 | 0.11 | -1.50  | 3.78 | 0.06 |
| E1 | TKW  | 7A | AX.89432757 | 1.57E+08 | 0.11 | -1.50  | 3.78 | 0.06 |
| E1 | TKW  | 7A | AX.89653048 | 2.29E+08 | 0.31 | -0.93  | 3.17 | 0.05 |
| E1 | TKW  | 7A | AX.89340252 | 1.32E+08 | 0.11 | -1.42  | 3.45 | 0.06 |
| E1 | TKW  | 7A | AX.89381481 | 1.46E+08 | 0.10 | -1.44  | 3.29 | 0.05 |
| E1 | TKW  | 7A | AX.89475720 | 1.49E+08 | 0.11 | -1.45  | 3.46 | 0.06 |



|    |      |    |             |          |      |         |      |      |
|----|------|----|-------------|----------|------|---------|------|------|
| E1 | TKW  | 7A | AX.89318490 | 1.68E+08 | 0.11 | -1.50   | 3.78 | 0.06 |
| E1 | TKW  | 7A | AX.89545760 | 9.25E+07 | 0.09 | -1.59   | 3.62 | 0.06 |
| E1 | GPM2 | 7A | AX.89690725 | 1.96E+07 | 0.24 | -673.90 | 3.00 | 0.05 |
| E1 | TKW  | 7A | AX.89495746 | 1.28E+08 | 0.11 | -1.45   | 3.44 | 0.06 |
| E1 | TKW  | 7A | AX.89314033 | 2.27E+08 | 0.28 | -1.00   | 3.44 | 0.06 |
| E1 | TKW  | 7A | AX.89565462 | 9.25E+07 | 0.13 | -1.75   | 5.70 | 0.10 |
| E1 | TKW  | 7A | AX.89442959 | 1.51E+08 | 0.11 | -1.38   | 3.15 | 0.05 |
| E1 | TKW  | 7A | AX.89620228 | 1.43E+08 | 0.11 | -1.50   | 3.78 | 0.06 |
| E1 | TKW  | 7A | AX.89634576 | 1.47E+08 | 0.10 | -1.44   | 3.29 | 0.05 |
| E1 | TKW  | 7A | AX.89429619 | 1.66E+08 | 0.11 | -1.50   | 3.78 | 0.06 |
| E1 | TKW  | 7A | AX.89428813 | 1.33E+08 | 0.12 | -1.53   | 4.01 | 0.07 |
| E1 | TKW  | 7A | AX.89559779 | 1.45E+08 | 0.11 | -1.38   | 3.15 | 0.05 |
| E1 | TKW  | 7A | AX.89376496 | 1.37E+08 | 0.09 | -1.45   | 3.09 | 0.05 |
| E1 | TKW  | 7A | AX.89592759 | 2.38E+08 | 0.32 | -0.90   | 3.03 | 0.05 |
| E1 | TKW  | 7A | AX.89405257 | 1.76E+08 | 0.10 | -1.37   | 3.00 | 0.05 |
| E1 | TKW  | 7A | AX.89433774 | 1.43E+08 | 0.11 | -1.50   | 3.78 | 0.06 |
| E1 | TKW  | 7A | AX.89481630 | 1.48E+08 | 0.11 | -1.38   | 3.15 | 0.05 |
| E1 | TKW  | 7A | AX.89391855 | 1.57E+08 | 0.11 | -1.50   | 3.78 | 0.06 |
| E1 | TKW  | 7A | AX.89431374 | 1.39E+08 | 0.11 | -1.48   | 3.69 | 0.07 |
| E1 | TKW  | 7A | AX.89667558 | 1.63E+08 | 0.11 | -1.50   | 3.78 | 0.06 |
| E1 | TKW  | 7A | AX.89364030 | 1.48E+08 | 0.10 | -1.52   | 3.61 | 0.06 |
| E1 | TKW  | 7A | AX.89692675 | 2.33E+08 | 0.31 | -0.93   | 3.24 | 0.05 |
| E1 | TKW  | 7A | AX.89478535 | 7.10E+08 | 0.35 | -0.98   | 3.68 | 0.07 |
| E1 | TKW  | 7A | AX.89553153 | 1.63E+08 | 0.11 | -1.38   | 3.15 | 0.05 |
| E1 | TKW  | 7A | AX.89699004 | 2.44E+08 | 0.47 | -0.90   | 3.45 | 0.06 |
| E1 | TKW  | 7A | AX.89401398 | 1.36E+08 | 0.11 | -1.48   | 3.69 | 0.07 |
| E1 | TKW  | 7A | AX.89673528 | 1.49E+08 | 0.10 | -1.43   | 3.25 | 0.05 |
| E1 | TKW  | 7A | AX.89318703 | 1.44E+08 | 0.11 | -1.50   | 3.78 | 0.06 |
| E1 | GPM2 | 7A | AX.89553054 | 1.47E+08 | 0.35 | 702.91  | 3.88 | 0.07 |
| E1 | TKW  | 7A | AX.89384804 | 1.73E+08 | 0.11 | -1.50   | 3.63 | 0.06 |
| E1 | TKW  | 7A | AX.89326929 | 6.47E+08 | 0.24 | -1.02   | 3.31 | 0.06 |
| E1 | TKW  | 7A | AX.89600026 | 1.45E+08 | 0.11 | -1.50   | 3.78 | 0.06 |
| E1 | TKW  | 7A | AX.89337396 | 1.72E+08 | 0.10 | -1.45   | 3.31 | 0.05 |
| E1 | TKW  | 7A | AX.89356497 | 1.59E+08 | 0.10 | -1.43   | 3.25 | 0.05 |
| E1 | TKW  | 7A | AX.89490648 | 1.49E+08 | 0.11 | -1.50   | 3.78 | 0.06 |
| E1 | TKW  | 7A | AX.89586120 | 1.39E+08 | 0.11 | -1.48   | 3.69 | 0.07 |
| E1 | TKW  | 7A | AX.89350564 | 1.01E+08 | 0.09 | -1.57   | 3.39 | 0.06 |
| E1 | TKW  | 7A | AX.89616482 | 1.47E+08 | 0.10 | -1.44   | 3.29 | 0.05 |
| E1 | TKW  | 7A | AX.89658013 | 1.55E+08 | 0.11 | -1.50   | 3.78 | 0.06 |
| E1 | TKW  | 7A | AX.89343125 | 1.50E+08 | 0.10 | -1.43   | 3.25 | 0.05 |
| E1 | TKW  | 7A | AX.89653730 | 1.45E+08 | 0.11 | -1.50   | 3.78 | 0.06 |
| E1 | TKW  | 7A | AX.89446261 | 1.48E+08 | 0.10 | -1.44   | 3.29 | 0.05 |
| E1 | TKW  | 7A | AX.89658779 | 1.48E+08 | 0.10 | -1.44   | 3.29 | 0.05 |
| E1 | TKW  | 7A | AX.89455107 | 1.47E+08 | 0.11 | -1.50   | 3.78 | 0.06 |
| E1 | TKW  | 7A | AX.89459271 | 1.57E+08 | 0.11 | -1.50   | 3.78 | 0.06 |
| E1 | TKW  | 7A | AX.89337397 | 1.69E+08 | 0.11 | -1.56   | 3.90 | 0.07 |
| E1 | TKW  | 7A | AX.89538446 | 1.37E+08 | 0.11 | -1.57   | 3.94 | 0.07 |
| E1 | TKW  | 7A | AX.89695896 | 6.72E+08 | 0.17 | -1.15   | 3.28 | 0.06 |
| E1 | TKW  | 7A | AX.89312431 | 1.63E+08 | 0.10 | -1.50   | 3.41 | 0.06 |
| E1 | TKW  | 7A | AX.89449879 | 1.63E+08 | 0.11 | -1.38   | 3.15 | 0.05 |

|    |      |    |             |          |      |         |      |      |
|----|------|----|-------------|----------|------|---------|------|------|
| E1 | TKW  | 7A | AX.89547821 | 1.27E+08 | 0.10 | -1.40   | 3.01 | 0.05 |
| E1 | TKW  | 7A | AX.89571322 | 1.74E+08 | 0.11 | -1.34   | 3.10 | 0.05 |
| E1 | TKW  | 7A | AX.89737403 | 1.68E+08 | 0.11 | -1.56   | 3.90 | 0.07 |
| E1 | TKW  | 7A | AX.89388449 | 1.31E+08 | 0.10 | -1.41   | 3.16 | 0.06 |
| E1 | TKW  | 7A | AX.89753039 | 1.54E+08 | 0.10 | -1.43   | 3.25 | 0.05 |
| E1 | TKW  | 7A | AX.89401450 | 1.40E+08 | 0.10 | -1.57   | 3.67 | 0.07 |
| E1 | TKW  | 7A | AX.89689588 | 9.31E+07 | 0.09 | -1.52   | 3.34 | 0.06 |
| E1 | TKW  | 7A | AX.89315926 | 1.49E+08 | 0.10 | -1.43   | 3.25 | 0.05 |
| E1 | GPM2 | 7A | AX.89645723 | 7.32E+08 | 0.16 | -899.19 | 3.74 | 0.07 |
| E1 | TKW  | 7A | AX.89548753 | 6.72E+08 | 0.18 | -1.15   | 3.32 | 0.06 |
| E1 | TKW  | 7A | AX.89348017 | 1.76E+08 | 0.10 | -1.37   | 3.00 | 0.05 |
| E1 | TKW  | 7A | AX.89559201 | 9.31E+07 | 0.14 | -1.56   | 4.76 | 0.08 |
| E1 | TKW  | 7A | AX.89379993 | 1.75E+08 | 0.11 | -1.50   | 3.63 | 0.06 |
| E1 | TKW  | 7A | AX.89622255 | 1.38E+08 | 0.10 | -1.50   | 3.41 | 0.06 |
| E1 | TKW  | 7A | AX.89533854 | 9.30E+07 | 0.09 | -1.53   | 3.39 | 0.06 |
| E1 | TKW  | 7A | AX.86168877 | 6.47E+08 | 0.22 | -1.17   | 3.97 | 0.07 |
| E1 | TKW  | 7A | AX.89613023 | 1.63E+08 | 0.11 | -1.38   | 3.15 | 0.05 |
| E1 | TKW  | 7A | AX.89427563 | 1.35E+08 | 0.10 | -1.50   | 3.41 | 0.06 |
| E1 | TKW  | 7A | AX.89407230 | 1.15E+08 | 0.09 | -1.68   | 3.83 | 0.06 |
| E1 | TKW  | 7A | AX.89364823 | 9.24E+07 | 0.13 | -1.75   | 5.70 | 0.10 |
| E1 | TKW  | 7A | AX.89597147 | 9.76E+07 | 0.14 | -1.49   | 4.48 | 0.08 |
| E1 | TKW  | 7A | AX.89600384 | 1.37E+08 | 0.11 | -1.58   | 4.13 | 0.07 |
| E1 | TKW  | 7A | AX.89462997 | 1.70E+08 | 0.11 | -1.50   | 3.78 | 0.06 |
| E1 | TKW  | 7A | AX.89639086 | 1.71E+08 | 0.11 | -1.50   | 3.63 | 0.06 |
| E1 | TKW  | 7A | AX.89385641 | 1.57E+08 | 0.11 | -1.50   | 3.78 | 0.06 |
| E1 | TKW  | 7A | AX.89527725 | 1.37E+08 | 0.12 | -1.53   | 4.01 | 0.07 |
| E1 | TKW  | 7A | AX.89495040 | 1.76E+08 | 0.10 | -1.37   | 3.00 | 0.05 |
| E1 | TKW  | 7A | AX.89603125 | 1.43E+08 | 0.11 | -1.50   | 3.78 | 0.06 |
| E1 | TKW  | 7A | AX.89386536 | 1.37E+08 | 0.09 | -1.45   | 3.09 | 0.05 |
| E1 | TKW  | 7A | AX.89333459 | 1.39E+08 | 0.11 | -1.48   | 3.69 | 0.07 |
| E1 | TKW  | 7A | AX.89762890 | 1.64E+08 | 0.11 | -1.50   | 3.78 | 0.06 |
| E1 | TKW  | 7A | AX.89489289 | 1.50E+08 | 0.11 | -1.50   | 3.78 | 0.06 |
| E1 | TKW  | 7A | AX.89377964 | 1.48E+08 | 0.11 | -1.50   | 3.78 | 0.06 |
| E1 | TKW  | 7A | AX.89665240 | 1.45E+08 | 0.11 | -1.50   | 3.78 | 0.06 |
| E1 | TKW  | 7A | AX.89440867 | 1.40E+08 | 0.11 | -1.41   | 3.37 | 0.06 |
| E1 | TKW  | 7A | AX.89449737 | 1.49E+08 | 0.11 | -1.50   | 3.78 | 0.06 |
| E1 | TKW  | 7A | AX.89481492 | 1.43E+08 | 0.11 | -1.50   | 3.78 | 0.06 |
| E1 | TKW  | 7A | AX.89635600 | 1.45E+08 | 0.11 | -1.38   | 3.15 | 0.05 |
| E1 | TKW  | 7A | AX.89687577 | 1.46E+08 | 0.10 | -1.44   | 3.29 | 0.05 |
| E1 | TKW  | 7A | AX.89379340 | 1.67E+08 | 0.11 | -1.50   | 3.78 | 0.06 |
| E1 | TKW  | 7A | AX.89667906 | 1.63E+08 | 0.11 | -1.50   | 3.78 | 0.06 |
| E1 | TKW  | 7A | AX.89366584 | 1.46E+08 | 0.11 | -1.38   | 3.15 | 0.05 |
| E1 | TKW  | 7A | AX.89328096 | 2.32E+08 | 0.31 | -0.93   | 3.17 | 0.05 |
| E1 | TKW  | 7A | AX.89381551 | 1.63E+08 | 0.11 | -1.50   | 3.78 | 0.06 |
| E1 | TKW  | 7A | AX.89698137 | 1.76E+08 | 0.10 | -1.37   | 3.00 | 0.05 |
| E1 | TKW  | 7A | AX.89655282 | 2.44E+08 | 0.47 | -0.97   | 3.93 | 0.07 |
| E1 | TKW  | 7A | AX.89679467 | 2.32E+08 | 0.31 | -0.93   | 3.17 | 0.05 |
| E1 | TKW  | 7A | AX.89594092 | 2.25E+08 | 0.30 | -0.91   | 3.06 | 0.05 |
| E1 | TKW  | 7A | AX.89424255 | 1.38E+08 | 0.12 | -1.44   | 3.72 | 0.07 |
| E1 | TKW  | 7A | AX.89328602 | 1.39E+08 | 0.10 | -1.53   | 3.66 | 0.07 |

|    |     |    |             |          |      |       |      |      |
|----|-----|----|-------------|----------|------|-------|------|------|
| E1 | TKW | 7A | AX.89319052 | 1.57E+08 | 0.10 | -1.43 | 3.25 | 0.05 |
| E1 | TKW | 7A | AX.89744487 | 1.73E+08 | 0.11 | -1.50 | 3.63 | 0.06 |
| E1 | TKW | 7A | AX.89609344 | 1.63E+08 | 0.11 | -1.50 | 3.78 | 0.06 |
| E1 | TKW | 7A | AX.89739311 | 1.72E+08 | 0.10 | -1.51 | 3.43 | 0.06 |
| E1 | TKW | 7A | AX.89658640 | 1.28E+08 | 0.11 | -1.50 | 3.76 | 0.07 |
| E1 | TKW | 7A | AX.89737889 | 1.59E+08 | 0.11 | -1.38 | 3.15 | 0.05 |
| E1 | TKW | 7A | AX.89612988 | 1.75E+08 | 0.11 | -1.50 | 3.63 | 0.06 |
| E1 | TKW | 7A | AX.89436093 | 1.49E+08 | 0.11 | -1.50 | 3.78 | 0.06 |
| E1 | TKW | 7A | AX.89738372 | 9.29E+07 | 0.13 | -1.75 | 5.70 | 0.10 |
| E1 | TKW | 7A | AX.89616060 | 1.51E+08 | 0.11 | -1.38 | 3.15 | 0.05 |
| E1 | TKW | 7A | AX.89591464 | 1.46E+08 | 0.11 | -1.50 | 3.78 | 0.06 |
| E1 | TKW | 7A | AX.89688580 | 1.74E+08 | 0.11 | -1.34 | 3.10 | 0.05 |
| E1 | TKW | 7A | AX.89610842 | 1.38E+08 | 0.11 | -1.48 | 3.69 | 0.07 |
| E1 | TKW | 7A | AX.89717346 | 1.57E+08 | 0.11 | -1.50 | 3.78 | 0.06 |
| E1 | TKW | 7A | AX.89336822 | 1.61E+08 | 0.10 | -1.43 | 3.25 | 0.05 |
| E1 | TKW | 7A | AX.89408190 | 2.26E+08 | 0.30 | -0.91 | 3.06 | 0.05 |
| E1 | TKW | 7A | AX.89373952 | 1.65E+08 | 0.11 | -1.38 | 3.15 | 0.05 |
| E1 | TKW | 7A | AX.89748859 | 1.30E+08 | 0.12 | -1.53 | 4.01 | 0.07 |
| E1 | TKW | 7A | AX.89429278 | 1.39E+08 | 0.12 | -1.53 | 4.01 | 0.07 |
| E1 | TKW | 7A | AX.89739003 | 1.35E+08 | 0.10 | -1.44 | 3.29 | 0.05 |
| E1 | TKW | 7A | AX.89454546 | 1.65E+08 | 0.10 | -1.44 | 3.29 | 0.05 |
| E1 | TKW | 7A | AX.89408882 | 2.29E+08 | 0.31 | -0.93 | 3.17 | 0.05 |
| E1 | TKW | 7A | AX.89571802 | 1.73E+08 | 0.10 | -1.37 | 3.00 | 0.05 |
| E1 | TKW | 7A | AX.89494699 | 1.67E+08 | 0.11 | -1.50 | 3.78 | 0.06 |
| E1 | TKW | 7A | AX.89698983 | 1.62E+08 | 0.10 | -1.43 | 3.25 | 0.05 |
| E1 | TKW | 7A | AX.89668647 | 9.66E+07 | 0.12 | -1.68 | 4.90 | 0.09 |
| E1 | TKW | 7A | AX.89335196 | 2.33E+08 | 0.33 | -0.90 | 3.12 | 0.05 |
| E1 | TKW | 7A | AX.89684792 | 1.49E+08 | 0.11 | -1.56 | 3.90 | 0.07 |
| E1 | TKW | 7A | AX.89374946 | 1.58E+08 | 0.10 | -1.43 | 3.25 | 0.05 |
| E1 | TKW | 7A | AX.89358941 | 1.40E+08 | 0.12 | -1.53 | 4.01 | 0.07 |
| E1 | TKW | 7A | AX.89677238 | 1.72E+08 | 0.11 | -1.53 | 3.77 | 0.06 |
| E1 | TKW | 7A | AX.89604680 | 1.60E+08 | 0.11 | -1.50 | 3.78 | 0.06 |
| E1 | TKW | 7A | AX.89424299 | 2.11E+08 | 0.11 | -1.45 | 3.46 | 0.06 |
| E1 | TKW | 7A | AX.89408864 | 1.28E+08 | 0.10 | -1.42 | 3.22 | 0.06 |
| E1 | TKW | 7A | AX.89384986 | 1.45E+08 | 0.11 | -1.50 | 3.78 | 0.06 |
| E1 | TKW | 7A | AX.89519151 | 1.30E+08 | 0.12 | -1.53 | 4.01 | 0.07 |
| E1 | TKW | 7A | AX.89541663 | 1.55E+08 | 0.10 | -1.43 | 3.25 | 0.05 |
| E1 | TKW | 7A | AX.89424539 | 1.69E+08 | 0.11 | -1.50 | 3.78 | 0.06 |
| E1 | TKW | 7A | AX.89495220 | 1.39E+08 | 0.12 | -1.53 | 4.01 | 0.07 |
| E1 | TKW | 7A | AX.89518598 | 1.43E+08 | 0.11 | -1.56 | 3.90 | 0.07 |
| E1 | TKW | 7A | AX.89669608 | 1.40E+08 | 0.11 | -1.46 | 3.48 | 0.06 |
| E1 | TKW | 7A | AX.89495549 | 1.46E+08 | 0.11 | -1.50 | 3.78 | 0.06 |
| E1 | TKW | 7A | AX.89542021 | 1.60E+08 | 0.11 | -1.45 | 3.46 | 0.06 |
| E1 | TKW | 7A | AX.89759894 | 1.45E+08 | 0.11 | -1.50 | 3.78 | 0.06 |
| E1 | TKW | 7A | AX.89732950 | 1.67E+08 | 0.11 | -1.50 | 3.78 | 0.06 |
| E1 | TKW | 7A | AX.89570644 | 1.71E+08 | 0.11 | -1.50 | 3.78 | 0.06 |
| E1 | TKW | 7A | AX.89309786 | 1.51E+08 | 0.11 | -1.38 | 3.15 | 0.05 |
| E1 | TKW | 7A | AX.89581387 | 1.45E+08 | 0.11 | -1.45 | 3.46 | 0.06 |
| E1 | TKW | 7A | AX.89329909 | 1.37E+08 | 0.12 | -1.53 | 4.01 | 0.07 |
| E1 | TKW | 7A | AX.89733362 | 1.76E+08 | 0.11 | -1.50 | 3.63 | 0.06 |

|    |     |    |             |          |      |       |      |      |
|----|-----|----|-------------|----------|------|-------|------|------|
| E1 | TKW | 7A | AX.89645712 | 1.28E+08 | 0.15 | -1.34 | 3.85 | 0.07 |
| E1 | TKW | 7A | AX.89325778 | 2.25E+08 | 0.30 | -0.91 | 3.06 | 0.05 |
| E1 | TKW | 7A | AX.89720833 | 1.68E+08 | 0.11 | -1.50 | 3.78 | 0.06 |
| E1 | TKW | 7A | AX.89571275 | 1.02E+08 | 0.08 | -1.65 | 3.57 | 0.06 |
| E1 | TKW | 7A | AX.89439595 | 1.54E+08 | 0.11 | -1.38 | 3.15 | 0.05 |
| E1 | TKW | 7A | AX.89573586 | 1.47E+08 | 0.11 | -1.50 | 3.78 | 0.06 |
| E1 | TKW | 7A | AX.89481987 | 1.56E+08 | 0.10 | -1.43 | 3.25 | 0.05 |
| E1 | TKW | 7A | AX.89687568 | 1.74E+08 | 0.11 | -1.34 | 3.10 | 0.05 |
| E1 | TKW | 7A | AX.89426544 | 1.30E+08 | 0.10 | -1.41 | 3.16 | 0.06 |
| E1 | TKW | 7A | AX.89687726 | 1.51E+08 | 0.10 | -1.43 | 3.25 | 0.05 |
| E1 | TKW | 7A | AX.89566474 | 1.43E+08 | 0.11 | -1.38 | 3.15 | 0.05 |
| E1 | TKW | 7A | AX.89447647 | 1.50E+08 | 0.10 | -1.43 | 3.25 | 0.05 |
| E1 | TKW | 7A | AX.89442492 | 1.53E+08 | 0.11 | -1.38 | 3.15 | 0.05 |
| E1 | TKW | 7A | AX.89582193 | 1.62E+08 | 0.10 | -1.43 | 3.25 | 0.05 |
| E1 | TKW | 7A | AX.89543397 | 1.62E+08 | 0.10 | -1.43 | 3.25 | 0.05 |
| E1 | TKW | 7A | AX.89379986 | 1.67E+08 | 0.11 | -1.50 | 3.78 | 0.06 |
| E1 | TKW | 7A | AX.89729094 | 1.63E+08 | 0.11 | -1.50 | 3.78 | 0.06 |
| E1 | TKW | 7A | AX.89541410 | 1.52E+08 | 0.11 | -1.38 | 3.15 | 0.05 |
| E1 | TKW | 7A | AX.89742694 | 1.75E+08 | 0.11 | -1.50 | 3.63 | 0.06 |
| E1 | TKW | 7A | AX.89638333 | 1.49E+08 | 0.11 | -1.50 | 3.78 | 0.06 |
| E1 | TKW | 7A | AX.89551275 | 1.71E+08 | 0.11 | -1.50 | 3.78 | 0.06 |
| E1 | TKW | 7A | AX.89396027 | 1.51E+08 | 0.10 | -1.43 | 3.25 | 0.05 |
| E1 | TKW | 7A | AX.89574852 | 1.43E+08 | 0.11 | -1.50 | 3.78 | 0.06 |
| E1 | TKW | 7A | AX.86162558 | 1.67E+08 | 0.11 | -1.50 | 3.78 | 0.06 |
| E1 | TKW | 7A | AX.89441107 | 1.63E+08 | 0.10 | -1.50 | 3.41 | 0.06 |
| E1 | TKW | 7A | AX.89311516 | 1.30E+08 | 0.10 | -1.41 | 3.16 | 0.06 |
| E1 | TKW | 7A | AX.89675586 | 1.50E+08 | 0.10 | -1.43 | 3.25 | 0.05 |
| E1 | TKW | 7A | AX.89476774 | 2.32E+08 | 0.31 | -0.93 | 3.17 | 0.05 |
| E1 | TKW | 7A | AX.89319864 | 1.69E+08 | 0.11 | -1.50 | 3.78 | 0.06 |
| E1 | TKW | 7A | AX.89771158 | 1.61E+08 | 0.11 | -1.50 | 3.78 | 0.06 |
| E1 | TKW | 7A | AX.89600748 | 1.73E+08 | 0.11 | -1.50 | 3.63 | 0.06 |
| E1 | TKW | 7A | AX.89471888 | 1.76E+08 | 0.10 | -1.37 | 3.00 | 0.05 |
| E1 | TKW | 7A | AX.89322760 | 1.63E+08 | 0.11 | -1.50 | 3.78 | 0.06 |
| E1 | TKW | 7A | AX.89665121 | 1.60E+08 | 0.11 | -1.38 | 3.15 | 0.05 |
| E1 | TKW | 7A | AX.89342100 | 1.67E+08 | 0.11 | -1.50 | 3.78 | 0.06 |
| E1 | TKW | 7A | AX.89506645 | 1.48E+08 | 0.11 | -1.50 | 3.78 | 0.06 |
| E1 | TKW | 7A | AX.89451632 | 1.43E+08 | 0.10 | -1.43 | 3.25 | 0.05 |
| E1 | TKW | 7A | AX.89357231 | 1.67E+08 | 0.11 | -1.45 | 3.46 | 0.06 |
| E1 | TKW | 7A | AX.89413407 | 1.43E+08 | 0.11 | -1.38 | 3.15 | 0.05 |
| E1 | TKW | 7A | AX.89472440 | 5.73E+08 | 0.22 | -1.01 | 3.08 | 0.05 |
| E1 | TKW | 7A | AX.89768645 | 1.37E+08 | 0.12 | -1.53 | 4.01 | 0.07 |
| E1 | TKW | 7A | AX.89623908 | 1.40E+08 | 0.11 | -1.50 | 3.78 | 0.06 |
| E1 | TKW | 7A | AX.89475303 | 1.60E+08 | 0.11 | -1.50 | 3.78 | 0.06 |
| E1 | TKW | 7A | AX.89690031 | 1.63E+08 | 0.11 | -1.50 | 3.78 | 0.06 |
| E1 | TKW | 7A | AX.89553054 | 1.47E+08 | 0.35 | -0.90 | 3.17 | 0.05 |
| E1 | TKW | 7A | AX.89561044 | 1.71E+08 | 0.11 | -1.50 | 3.78 | 0.06 |
| E1 | TKW | 7A | AX.89690160 | 1.56E+08 | 0.11 | -1.50 | 3.78 | 0.06 |
| E1 | TKW | 7A | AX.89358256 | 1.43E+08 | 0.11 | -1.50 | 3.78 | 0.06 |
| E1 | TKW | 7A | AX.89515937 | 1.54E+08 | 0.10 | -1.43 | 3.25 | 0.05 |
| E1 | TKW | 7A | AX.89763534 | 1.37E+08 | 0.12 | -1.53 | 4.01 | 0.07 |

|    |     |    |             |          |      |       |      |      |
|----|-----|----|-------------|----------|------|-------|------|------|
| E1 | TKW | 7A | AX.89421557 | 1.28E+08 | 0.09 | -1.47 | 3.16 | 0.05 |
| E1 | TKW | 7A | AX.89492125 | 2.44E+08 | 0.47 | -0.97 | 3.93 | 0.07 |
| E1 | TKW | 7A | AX.89569029 | 1.46E+08 | 0.10 | -1.44 | 3.29 | 0.05 |
| E1 | TKW | 7A | AX.89731543 | 1.59E+08 | 0.11 | -1.38 | 3.15 | 0.05 |
| E1 | TKW | 7A | AX.89398419 | 1.63E+08 | 0.11 | -1.50 | 3.78 | 0.06 |
| E1 | TKW | 7A | AX.89507660 | 1.45E+08 | 0.10 | -1.52 | 3.61 | 0.06 |
| E1 | TKW | 7A | AX.89343242 | 1.48E+08 | 0.10 | -1.44 | 3.29 | 0.05 |
| E1 | TKW | 7A | AX.89414396 | 1.51E+08 | 0.10 | -1.43 | 3.25 | 0.05 |
| E1 | TKW | 7A | AX.89351281 | 1.32E+08 | 0.12 | -1.53 | 4.01 | 0.07 |
| E1 | TKW | 7A | AX.89524399 | 1.66E+08 | 0.11 | -1.50 | 3.78 | 0.06 |
| E1 | TKW | 7A | AX.89430696 | 1.29E+08 | 0.11 | -1.58 | 4.13 | 0.07 |
| E1 | TKW | 7A | AX.89722128 | 2.32E+08 | 0.31 | -0.93 | 3.17 | 0.05 |
| E1 | TKW | 7A | AX.86162557 | 1.67E+08 | 0.11 | -1.50 | 3.78 | 0.06 |
| E1 | TKW | 7A | AX.89400029 | 1.71E+08 | 0.10 | -1.51 | 3.57 | 0.06 |
| E1 | TKW | 7A | AX.89525055 | 1.39E+08 | 0.10 | -1.50 | 3.41 | 0.06 |
| E1 | TKW | 7A | AX.89390913 | 1.45E+08 | 0.10 | -1.44 | 3.29 | 0.05 |
| E1 | TKW | 7A | AX.89359898 | 1.41E+08 | 0.11 | -1.38 | 3.15 | 0.05 |
| E1 | TKW | 7A | AX.89531975 | 1.38E+08 | 0.11 | -1.48 | 3.69 | 0.07 |
| E1 | TKW | 7A | AX.89314112 | 1.43E+08 | 0.10 | -1.44 | 3.29 | 0.05 |
| E1 | TKW | 7A | AX.89530196 | 9.19E+07 | 0.13 | -1.75 | 5.70 | 0.10 |
| E1 | TKW | 7A | AX.89738505 | 1.55E+08 | 0.10 | -1.43 | 3.25 | 0.05 |
| E1 | TKW | 7A | AX.89670058 | 1.43E+08 | 0.11 | -1.50 | 3.78 | 0.06 |
| E1 | TKW | 7A | AX.89634786 | 2.27E+08 | 0.30 | -0.91 | 3.06 | 0.05 |
| E1 | TKW | 7A | AX.89700694 | 1.36E+08 | 0.11 | -1.46 | 3.48 | 0.06 |
| E1 | TKW | 7A | AX.86164540 | 1.59E+08 | 0.11 | -1.38 | 3.15 | 0.05 |
| E1 | TKW | 7A | AX.89466610 | 1.74E+08 | 0.11 | -1.34 | 3.10 | 0.05 |
| E1 | TKW | 7A | AX.89431964 | 1.66E+08 | 0.10 | -1.44 | 3.29 | 0.05 |
| E1 | TKW | 7A | AX.89756658 | 2.44E+08 | 0.47 | -0.90 | 3.45 | 0.06 |
| E1 | TKW | 7A | AX.89693107 | 1.38E+08 | 0.12 | -1.53 | 4.01 | 0.07 |
| E1 | TKW | 7A | AX.89593216 | 1.54E+08 | 0.11 | -1.38 | 3.15 | 0.05 |
| E1 | TKW | 7A | AX.89652041 | 1.49E+08 | 0.11 | -1.50 | 3.78 | 0.06 |
| E1 | TKW | 7A | AX.89701338 | 1.43E+08 | 0.10 | -1.44 | 3.29 | 0.05 |
| E1 | TKW | 7A | AX.89469876 | 1.72E+08 | 0.10 | -1.45 | 3.31 | 0.05 |
| E1 | TKW | 7A | AX.89668508 | 1.50E+08 | 0.11 | -1.50 | 3.78 | 0.06 |
| E1 | TKW | 7A | AX.89676641 | 1.39E+08 | 0.10 | -1.50 | 3.41 | 0.06 |
| E1 | TKW | 7A | AX.89596149 | 1.64E+08 | 0.11 | -1.50 | 3.78 | 0.06 |
| E1 | TKW | 7A | AX.89627312 | 1.69E+08 | 0.11 | -1.50 | 3.78 | 0.06 |
| E1 | TKW | 7A | AX.89361534 | 1.48E+08 | 0.11 | -1.50 | 3.78 | 0.06 |
| E1 | TKW | 7A | AX.89627704 | 1.71E+08 | 0.11 | -1.50 | 3.78 | 0.06 |
| E1 | TKW | 7A | AX.89468092 | 1.27E+08 | 0.10 | -1.40 | 3.01 | 0.05 |
| E1 | TKW | 7A | AX.89597222 | 1.61E+08 | 0.11 | -1.50 | 3.78 | 0.06 |
| E1 | TKW | 7A | AX.89324648 | 1.67E+08 | 0.11 | -1.50 | 3.78 | 0.06 |
| E1 | TKW | 7A | AX.89488417 | 6.72E+08 | 0.17 | -1.15 | 3.28 | 0.06 |
| E1 | TKW | 7A | AX.89471482 | 1.35E+08 | 0.12 | -1.53 | 4.01 | 0.07 |
| E1 | TKW | 7A | AX.89750570 | 1.28E+08 | 0.11 | -1.50 | 3.76 | 0.07 |
| E1 | TKW | 7A | AX.89512065 | 1.53E+08 | 0.11 | -1.38 | 3.15 | 0.05 |
| E1 | TKW | 7A | AX.89732679 | 1.36E+08 | 0.12 | -1.53 | 4.01 | 0.07 |
| E1 | TKW | 7A | AX.89346440 | 1.51E+08 | 0.12 | -1.30 | 3.13 | 0.05 |
| E1 | TKW | 7A | AX.89512410 | 1.48E+08 | 0.11 | -1.50 | 3.78 | 0.06 |
| E1 | TKW | 7A | AX.89480466 | 1.43E+08 | 0.11 | -1.36 | 3.20 | 0.05 |

|    |     |    |             |          |      |       |      |      |
|----|-----|----|-------------|----------|------|-------|------|------|
| E1 | TKW | 7A | AX.89546999 | 9.24E+07 | 0.13 | -1.75 | 5.70 | 0.10 |
| E1 | TKW | 7A | AX.89600792 | 1.51E+08 | 0.11 | -1.38 | 3.15 | 0.05 |
| E1 | TKW | 7A | AX.89512482 | 2.44E+08 | 0.47 | -0.97 | 3.93 | 0.07 |
| E1 | TKW | 7A | AX.89776997 | 2.31E+08 | 0.31 | -0.93 | 3.17 | 0.05 |
| E1 | TKW | 7A | AX.89339065 | 1.63E+08 | 0.11 | -1.38 | 3.15 | 0.05 |
| E1 | TKW | 7A | AX.89441489 | 1.28E+08 | 0.15 | -1.34 | 3.85 | 0.07 |
| E1 | TKW | 7A | AX.89317646 | 1.73E+08 | 0.11 | -1.50 | 3.63 | 0.06 |
| E1 | TKW | 7A | AX.89418195 | 2.33E+08 | 0.31 | -0.93 | 3.17 | 0.05 |
| E1 | TKW | 7A | AX.89325743 | 1.73E+08 | 0.11 | -1.50 | 3.63 | 0.06 |
| E1 | TKW | 7A | AX.89418410 | 1.55E+08 | 0.11 | -1.50 | 3.78 | 0.06 |
| E1 | TKW | 7A | AX.89709285 | 1.57E+08 | 0.11 | -1.50 | 3.78 | 0.06 |
| E1 | TKW | 7A | AX.89326050 | 2.32E+08 | 0.31 | -0.93 | 3.17 | 0.05 |
| E1 | TKW | 7A | AX.89590737 | 1.31E+08 | 0.11 | -1.48 | 3.69 | 0.07 |
| E1 | TKW | 7A | AX.89364082 | 1.40E+08 | 0.11 | -1.45 | 3.46 | 0.06 |
| E1 | TKW | 7A | AX.89318327 | 1.38E+08 | 0.10 | -1.50 | 3.41 | 0.06 |
| E1 | TKW | 7A | AX.89386658 | 1.46E+08 | 0.11 | -1.38 | 3.15 | 0.05 |
| E1 | TKW | 7A | AX.89513597 | 1.71E+08 | 0.11 | -1.50 | 3.78 | 0.06 |
| E1 | TKW | 7A | AX.89513616 | 9.31E+07 | 0.14 | -1.56 | 4.76 | 0.08 |
| E1 | TKW | 7A | AX.89379708 | 2.33E+08 | 0.31 | -0.93 | 3.17 | 0.05 |
| E1 | TKW | 7A | AX.89482819 | 1.69E+08 | 0.11 | -1.50 | 3.78 | 0.06 |
| E1 | TKW | 7A | AX.89761515 | 1.30E+08 | 0.11 | -1.46 | 3.48 | 0.06 |
| E1 | TKW | 7A | AX.89769703 | 1.63E+08 | 0.11 | -1.38 | 3.15 | 0.05 |
| E1 | TKW | 7A | AX.89450524 | 1.63E+08 | 0.11 | -1.50 | 3.78 | 0.06 |
| E1 | TKW | 7A | AX.89409809 | 1.56E+08 | 0.11 | -1.50 | 3.78 | 0.06 |
| E1 | TKW | 7A | AX.89567196 | 2.38E+08 | 0.39 | 1.00  | 4.00 | 0.07 |
| E1 | TKW | 7A | AX.89311179 | 1.33E+08 | 0.11 | -1.46 | 3.48 | 0.06 |
| E1 | TKW | 7A | AX.89396165 | 1.42E+08 | 0.11 | -1.45 | 3.46 | 0.06 |
| E1 | TKW | 7A | AX.89319382 | 1.45E+08 | 0.10 | -1.44 | 3.29 | 0.05 |
| E1 | TKW | 7A | AX.89551667 | 1.27E+08 | 0.11 | -1.36 | 3.18 | 0.05 |
| E1 | TKW | 7A | AX.89443611 | 1.69E+08 | 0.11 | -1.50 | 3.78 | 0.06 |
| E1 | TKW | 7A | AX.89404511 | 1.73E+08 | 0.11 | -1.50 | 3.63 | 0.06 |
| E1 | TKW | 7A | AX.89672639 | 1.62E+08 | 0.11 | -1.50 | 3.78 | 0.06 |
| E1 | TKW | 7A | AX.89311463 | 1.28E+08 | 0.11 | -1.45 | 3.44 | 0.06 |
| E1 | TKW | 7A | AX.89420379 | 1.44E+08 | 0.11 | -1.50 | 3.78 | 0.06 |
| E1 | TKW | 7A | AX.89714055 | 1.51E+08 | 0.10 | -1.43 | 3.25 | 0.05 |
| E1 | TKW | 7A | AX.89583672 | 1.37E+08 | 0.12 | -1.53 | 4.01 | 0.07 |
| E1 | TKW | 7A | AX.89357153 | 1.29E+08 | 0.10 | -1.50 | 3.41 | 0.06 |
| E1 | TKW | 7A | AX.89342122 | 2.26E+08 | 0.30 | -0.91 | 3.06 | 0.05 |
| E1 | TKW | 7A | AX.89311992 | 1.67E+08 | 0.11 | -1.50 | 3.78 | 0.06 |
| E1 | TKW | 7A | AX.89334619 | 2.32E+08 | 0.31 | -0.93 | 3.17 | 0.05 |
| E1 | TKW | 7A | AX.89342760 | 9.19E+07 | 0.10 | -1.60 | 3.81 | 0.06 |
| E1 | TKW | 7A | AX.89576527 | 1.45E+08 | 0.11 | -1.38 | 3.15 | 0.05 |
| E1 | TKW | 7A | AX.89666093 | 1.29E+08 | 0.11 | -1.46 | 3.48 | 0.06 |
| E1 | TKW | 7A | AX.89763747 | 1.73E+08 | 0.11 | -1.50 | 3.63 | 0.06 |
| E1 | TKW | 7A | AX.89569119 | 1.64E+08 | 0.11 | -1.50 | 3.78 | 0.06 |
| E1 | TKW | 7A | AX.89553419 | 9.29E+07 | 0.10 | -1.55 | 3.58 | 0.06 |
| E1 | TKW | 7A | AX.89723991 | 1.58E+08 | 0.10 | -1.43 | 3.25 | 0.05 |
| E1 | TKW | 7A | AX.89641122 | 1.56E+08 | 0.12 | -1.36 | 3.28 | 0.05 |
| E1 | TKW | 7A | AX.89585251 | 1.51E+08 | 0.10 | -1.43 | 3.25 | 0.05 |
| E1 | TKW | 7A | AX.89321294 | 1.37E+08 | 0.12 | -1.53 | 4.01 | 0.07 |

|    |     |    |             |          |      |       |      |      |
|----|-----|----|-------------|----------|------|-------|------|------|
| E1 | TKW | 7A | AX.89731809 | 1.37E+08 | 0.11 | -1.58 | 4.14 | 0.07 |
| E1 | TKW | 7A | AX.89594062 | 1.39E+08 | 0.12 | -1.53 | 4.01 | 0.07 |
| E1 | TKW | 7A | AX.89333393 | 1.50E+08 | 0.11 | -1.50 | 3.78 | 0.06 |
| E1 | TKW | 7A | AX.89617748 | 1.49E+08 | 0.11 | -1.56 | 3.90 | 0.07 |
| E1 | TKW | 7A | AX.89430418 | 1.67E+08 | 0.11 | -1.38 | 3.15 | 0.05 |
| E1 | TKW | 7A | AX.89682294 | 1.63E+08 | 0.11 | -1.38 | 3.15 | 0.05 |
| E1 | TKW | 7A | AX.89577336 | 1.57E+08 | 0.11 | -1.50 | 3.78 | 0.06 |
| E1 | TKW | 7A | AX.89773333 | 1.38E+08 | 0.11 | -1.48 | 3.69 | 0.07 |
| E1 | TKW | 7A | AX.89724466 | 2.03E+08 | 0.10 | -1.45 | 3.31 | 0.05 |
| E1 | TKW | 7A | AX.89390586 | 1.42E+08 | 0.11 | -1.45 | 3.46 | 0.06 |
| E1 | TKW | 7A | AX.86162561 | 1.67E+08 | 0.11 | -1.50 | 3.78 | 0.06 |
| E1 | TKW | 7A | AX.89486274 | 1.69E+08 | 0.11 | -1.50 | 3.78 | 0.06 |
| E1 | TKW | 7A | AX.89453590 | 1.48E+08 | 0.10 | -1.44 | 3.29 | 0.05 |
| E1 | TKW | 7A | AX.89539683 | 1.02E+08 | 0.09 | -1.57 | 3.39 | 0.06 |
| E1 | TKW | 7A | AX.89334123 | 9.22E+07 | 0.13 | -1.75 | 5.70 | 0.10 |
| E1 | TKW | 7A | AX.89578150 | 1.63E+08 | 0.11 | -1.38 | 3.15 | 0.05 |
| E1 | TKW | 7A | AX.89376150 | 1.49E+08 | 0.11 | -1.50 | 3.78 | 0.06 |
| E1 | TKW | 7A | AX.89368776 | 1.54E+08 | 0.11 | -1.50 | 3.78 | 0.06 |
| E1 | TKW | 7A | AX.89407934 | 1.51E+08 | 0.11 | -1.50 | 3.78 | 0.06 |
| E1 | TKW | 7A | AX.89368845 | 1.65E+08 | 0.11 | -1.44 | 3.51 | 0.06 |
| E1 | TKW | 7A | AX.89421069 | 1.50E+08 | 0.11 | -1.38 | 3.15 | 0.05 |
| E1 | TKW | 7A | AX.89654496 | 1.66E+08 | 0.10 | -1.52 | 3.61 | 0.06 |
| E1 | TKW | 7A | AX.89421091 | 1.38E+08 | 0.10 | -1.52 | 3.61 | 0.06 |
| E1 | TKW | 7A | AX.89540208 | 1.48E+08 | 0.11 | -1.38 | 3.15 | 0.05 |
| E1 | TKW | 7A | AX.89368896 | 2.29E+08 | 0.31 | -0.93 | 3.17 | 0.05 |
| E1 | TKW | 7A | AX.89323490 | 1.45E+08 | 0.11 | -1.45 | 3.46 | 0.06 |
| E1 | TKW | 7A | AX.89717943 | 1.49E+08 | 0.11 | -1.50 | 3.78 | 0.06 |
| E1 | TKW | 7A | AX.89392397 | 2.11E+08 | 0.10 | -1.43 | 3.25 | 0.05 |
| E1 | TKW | 7A | AX.89369333 | 6.48E+08 | 0.22 | -1.17 | 3.97 | 0.07 |
| E1 | TKW | 7A | AX.89749362 | 1.64E+08 | 0.10 | -1.63 | 4.07 | 0.07 |
| E1 | TKW | 7A | AX.89330404 | 1.39E+08 | 0.12 | -1.53 | 4.01 | 0.07 |
| E1 | TKW | 7A | AX.89315748 | 1.51E+08 | 0.11 | -1.38 | 3.15 | 0.05 |
| E1 | TKW | 7A | AX.89487592 | 1.41E+08 | 0.11 | -1.38 | 3.15 | 0.05 |
| E1 | TKW | 7A | AX.89775586 | 1.63E+08 | 0.11 | -1.38 | 3.15 | 0.05 |
| E1 | TKW | 7A | AX.89454763 | 1.57E+08 | 0.11 | -1.50 | 3.78 | 0.06 |
| E1 | TKW | 7A | AX.89526730 | 1.36E+08 | 0.11 | -1.54 | 3.80 | 0.07 |
| E1 | TKW | 7A | AX.89470303 | 1.68E+08 | 0.10 | -1.51 | 3.57 | 0.06 |
| E1 | TKW | 7A | AX.89416760 | 1.63E+08 | 0.11 | -1.50 | 3.78 | 0.06 |
| E1 | TKW | 7A | AX.89726582 | 1.38E+08 | 0.09 | -1.45 | 3.09 | 0.05 |
| E1 | TKW | 7A | AX.89324138 | 1.73E+08 | 0.11 | -1.50 | 3.63 | 0.06 |
| E1 | TKW | 7A | AX.89644225 | 1.50E+08 | 0.10 | -1.43 | 3.25 | 0.05 |
| E1 | TKW | 7A | AX.89440469 | 1.66E+08 | 0.11 | -1.50 | 3.78 | 0.06 |
| E1 | TKW | 7A | AX.89495101 | 1.58E+08 | 0.10 | -1.43 | 3.25 | 0.05 |
| E1 | TKW | 7A | AX.89588814 | 1.74E+08 | 0.10 | -1.37 | 3.00 | 0.05 |
| E1 | TKW | 7A | AX.89316650 | 2.26E+08 | 0.30 | -0.91 | 3.06 | 0.05 |
| E1 | TKW | 7A | AX.89488132 | 1.65E+08 | 0.11 | -1.50 | 3.78 | 0.06 |
| E1 | TKW | 7A | AX.89519246 | 1.45E+08 | 0.10 | -1.44 | 3.29 | 0.05 |
| E1 | TKW | 7A | AX.89702672 | 1.66E+08 | 0.11 | -1.50 | 3.78 | 0.06 |
| E1 | TKW | 7A | AX.89324453 | 1.36E+08 | 0.12 | -1.53 | 4.01 | 0.07 |
| E1 | TKW | 7A | AX.89433471 | 1.38E+08 | 0.11 | -1.48 | 3.69 | 0.07 |

|    |     |    |             |          |      |       |      |      |
|----|-----|----|-------------|----------|------|-------|------|------|
| E1 | TKW | 7A | AX.89402089 | 1.65E+08 | 0.11 | -1.50 | 3.78 | 0.06 |
| E1 | TKW | 7A | AX.89653490 | 1.62E+08 | 0.10 | -1.43 | 3.25 | 0.05 |
| E1 | TKW | 7A | AX.89402098 | 1.57E+08 | 0.10 | -1.43 | 3.25 | 0.05 |
| E1 | TKW | 7A | AX.89448757 | 1.63E+08 | 0.09 | -1.45 | 3.09 | 0.05 |
| E1 | TKW | 7A | AX.89527502 | 1.30E+08 | 0.12 | -1.53 | 4.01 | 0.07 |
| E1 | TKW | 7A | AX.89373097 | 1.55E+08 | 0.11 | -1.56 | 3.90 | 0.07 |
| E1 | TKW | 7A | AX.89519648 | 1.67E+08 | 0.11 | -1.57 | 3.94 | 0.07 |
| E1 | TKW | 7A | AX.89438626 | 1.37E+08 | 0.12 | -1.53 | 4.01 | 0.07 |
| E1 | TKW | 7A | AX.89740607 | 1.67E+08 | 0.11 | -1.45 | 3.46 | 0.06 |
| E1 | TKW | 7A | AX.89750928 | 1.76E+08 | 0.11 | -1.50 | 3.63 | 0.06 |
| E1 | TKW | 7A | AX.89678230 | 1.48E+08 | 0.11 | -1.50 | 3.78 | 0.06 |
| E1 | TKW | 7A | AX.89549723 | 1.44E+08 | 0.11 | -1.50 | 3.78 | 0.06 |
| E1 | TKW | 7A | AX.89534932 | 1.63E+08 | 0.11 | -1.50 | 3.78 | 0.06 |
| E1 | TKW | 7A | AX.89423557 | 1.37E+08 | 0.10 | -1.50 | 3.41 | 0.06 |
| E1 | TKW | 7A | AX.89662317 | 1.54E+08 | 0.11 | -1.38 | 3.15 | 0.05 |
| E1 | TKW | 7A | AX.89637385 | 1.50E+08 | 0.10 | -1.43 | 3.25 | 0.05 |
| E1 | TKW | 7A | AX.89566041 | 1.43E+08 | 0.10 | -1.43 | 3.25 | 0.05 |
| E1 | TKW | 7A | AX.89607110 | 1.30E+08 | 0.11 | -1.46 | 3.48 | 0.06 |
| E1 | TKW | 7A | AX.89655050 | 2.45E+08 | 0.47 | -0.90 | 3.45 | 0.06 |
| E1 | TKW | 7A | AX.89768981 | 6.72E+08 | 0.16 | -1.15 | 3.14 | 0.05 |
| E1 | TKW | 7A | AX.89637754 | 1.63E+08 | 0.11 | -1.38 | 3.15 | 0.05 |
| E1 | TKW | 7A | AX.89395282 | 1.59E+08 | 0.11 | -1.38 | 3.15 | 0.05 |
| E1 | TKW | 7A | AX.89528953 | 1.76E+08 | 0.11 | -1.50 | 3.63 | 0.06 |
| E1 | TKW | 7A | AX.89310681 | 1.57E+08 | 0.11 | -1.50 | 3.78 | 0.06 |
| E1 | TKW | 7A | AX.89464561 | 9.31E+07 | 0.14 | -1.56 | 4.76 | 0.08 |
| E1 | TKW | 7A | AX.89679312 | 1.71E+08 | 0.11 | -1.45 | 3.46 | 0.06 |
| E1 | TKW | 7A | AX.89412224 | 1.46E+08 | 0.10 | -1.44 | 3.29 | 0.05 |
| E1 | TKW | 7A | AX.89403578 | 1.43E+08 | 0.11 | -1.45 | 3.46 | 0.06 |
| E1 | TKW | 7A | AX.89713016 | 1.34E+08 | 0.11 | -1.46 | 3.48 | 0.06 |
| E1 | TKW | 7A | AX.89476104 | 1.48E+08 | 0.11 | -1.50 | 3.78 | 0.06 |
| E1 | TKW | 7A | AX.89567073 | 1.48E+08 | 0.11 | -1.50 | 3.78 | 0.06 |
| E1 | TKW | 7A | AX.89574663 | 2.25E+08 | 0.30 | -0.91 | 3.06 | 0.05 |
| E1 | TKW | 7A | AX.89356403 | 1.62E+08 | 0.11 | -1.50 | 3.78 | 0.06 |
| E1 | TKW | 7A | AX.89529655 | 1.48E+08 | 0.11 | -1.50 | 3.78 | 0.06 |
| E1 | TKW | 7A | AX.89343793 | 1.57E+08 | 0.11 | -1.50 | 3.78 | 0.06 |
| E1 | TKW | 7A | AX.89559659 | 1.48E+08 | 0.10 | -1.44 | 3.29 | 0.05 |
| E1 | TKW | 7A | AX.89559664 | 1.51E+08 | 0.10 | -1.43 | 3.25 | 0.05 |
| E1 | TKW | 7A | AX.89483519 | 2.31E+08 | 0.31 | -0.93 | 3.17 | 0.05 |
| E1 | TKW | 7A | AX.89722248 | 1.30E+08 | 0.11 | -1.48 | 3.69 | 0.07 |
| E1 | TKW | 7A | AX.89490773 | 1.39E+08 | 0.12 | -1.53 | 4.01 | 0.07 |
| E1 | TKW | 7A | AX.89560011 | 1.45E+08 | 0.10 | -1.44 | 3.29 | 0.05 |
| E1 | TKW | 7A | AX.89506095 | 1.39E+08 | 0.12 | -1.53 | 4.01 | 0.07 |
| E1 | TKW | 7A | AX.89474306 | 1.43E+08 | 0.11 | -1.38 | 3.15 | 0.05 |
| E1 | TKW | 7A | AX.89738283 | 1.65E+08 | 0.10 | -1.58 | 3.87 | 0.07 |
| E1 | TKW | 7A | AX.89341815 | 1.34E+08 | 0.12 | -1.53 | 4.01 | 0.07 |
| E1 | TKW | 7A | AX.89705794 | 1.63E+08 | 0.11 | -1.50 | 3.78 | 0.06 |
| E1 | TKW | 7A | AX.89680684 | 9.31E+07 | 0.09 | -1.52 | 3.34 | 0.06 |
| E1 | TKW | 7A | AX.89583849 | 2.44E+08 | 0.47 | -0.97 | 3.93 | 0.07 |
| E1 | TKW | 7A | AX.89552552 | 1.63E+08 | 0.11 | -1.38 | 3.15 | 0.05 |
| E1 | TKW | 7A | AX.89537443 | 2.28E+08 | 0.31 | -0.93 | 3.17 | 0.05 |



|    |     |    |             |          |      |       |      |      |
|----|-----|----|-------------|----------|------|-------|------|------|
| E1 | TKW | 7A | AX.89373636 | 1.71E+08 | 0.11 | -1.50 | 3.78 | 0.06 |
| E1 | TKW | 7A | AX.89530468 | 1.66E+08 | 0.11 | -1.38 | 3.15 | 0.05 |
| E1 | TKW | 7A | AX.89656982 | 1.54E+08 | 0.10 | -1.43 | 3.25 | 0.05 |
| E1 | TKW | 7A | AX.89312333 | 1.56E+08 | 0.11 | -1.50 | 3.78 | 0.06 |
| E1 | TKW | 7A | AX.89374014 | 1.43E+08 | 0.11 | -1.50 | 3.78 | 0.06 |
| E1 | TKW | 7A | AX.89537763 | 1.62E+08 | 0.11 | -1.50 | 3.78 | 0.06 |
| E1 | TKW | 7A | AX.89609075 | 1.52E+08 | 0.11 | -1.38 | 3.15 | 0.05 |
| E1 | TKW | 7A | AX.89421438 | 1.47E+08 | 0.10 | -1.44 | 3.29 | 0.05 |
| E1 | TKW | 7A | AX.89515736 | 1.44E+08 | 0.11 | -1.50 | 3.78 | 0.06 |
| E1 | TKW | 7A | AX.89657558 | 1.46E+08 | 0.11 | -1.38 | 3.15 | 0.05 |
| E1 | TKW | 7A | AX.89445214 | 1.62E+08 | 0.10 | -1.43 | 3.25 | 0.05 |
| E1 | TKW | 7A | AX.89445248 | 1.41E+08 | 0.11 | -1.38 | 3.15 | 0.05 |
| E1 | TKW | 7A | AX.89561391 | 1.49E+08 | 0.11 | -1.50 | 3.78 | 0.06 |
| E1 | TKW | 7A | AX.89611753 | 1.60E+08 | 0.10 | -1.43 | 3.25 | 0.05 |
| E1 | TKW | 7A | AX.89518568 | 1.50E+08 | 0.10 | -1.43 | 3.25 | 0.05 |
| E1 | TKW | 7A | AX.89487600 | 1.33E+08 | 0.11 | -1.46 | 3.48 | 0.06 |
| E1 | TKW | 7A | AX.89437582 | 1.66E+08 | 0.11 | -1.50 | 3.78 | 0.06 |
| E1 | TKW | 7A | AX.89389944 | 1.57E+08 | 0.11 | -1.50 | 3.78 | 0.06 |
| E1 | TKW | 7A | AX.89593768 | 2.39E+08 | 0.32 | -0.96 | 3.40 | 0.06 |
| E1 | TKW | 7A | AX.89459716 | 1.31E+08 | 0.10 | -1.52 | 3.60 | 0.06 |
| E1 | TKW | 7A | AX.89569389 | 1.36E+08 | 0.12 | -1.53 | 4.01 | 0.07 |
| E1 | TKW | 7A | AX.89602055 | 1.44E+08 | 0.10 | -1.52 | 3.61 | 0.06 |
| E1 | TKW | 7A | AX.89585629 | 1.39E+08 | 0.11 | -1.57 | 3.94 | 0.07 |
| E1 | TKW | 7A | AX.89755224 | 1.56E+08 | 0.10 | -1.43 | 3.25 | 0.05 |
| E1 | TKW | 7A | AX.89367073 | 1.57E+08 | 0.11 | -1.50 | 3.78 | 0.06 |
| E1 | TKW | 7A | AX.89485900 | 1.70E+08 | 0.11 | -1.45 | 3.46 | 0.06 |
| E1 | TKW | 7A | AX.89739998 | 1.45E+08 | 0.10 | -1.44 | 3.29 | 0.05 |
| E1 | TKW | 7A | AX.89445892 | 1.38E+08 | 0.11 | -1.48 | 3.69 | 0.07 |
| E1 | TKW | 7A | AX.89691373 | 1.69E+08 | 0.11 | -1.50 | 3.78 | 0.06 |
| E1 | TKW | 7A | AX.89524542 | 1.35E+08 | 0.12 | -1.53 | 4.01 | 0.07 |
| E1 | TKW | 7A | AX.89546700 | 1.57E+08 | 0.11 | -1.38 | 3.15 | 0.05 |
| E1 | TKW | 7A | AX.89344105 | 1.55E+08 | 0.11 | -1.45 | 3.46 | 0.06 |
| E1 | TKW | 7A | AX.89554508 | 1.43E+08 | 0.11 | -1.50 | 3.78 | 0.06 |
| E1 | TKW | 7A | AX.89689052 | 1.29E+08 | 0.11 | -1.46 | 3.48 | 0.06 |
| E1 | TKW | 7A | AX.89468815 | 1.39E+08 | 0.10 | -1.50 | 3.41 | 0.06 |
| E1 | TKW | 7A | AX.89344288 | 1.28E+08 | 0.10 | -1.60 | 3.82 | 0.06 |
| E1 | TKW | 7A | AX.89675710 | 1.52E+08 | 0.16 | -1.32 | 3.98 | 0.07 |
| E1 | TKW | 7A | AX.89423328 | 2.11E+08 | 0.10 | -1.43 | 3.25 | 0.05 |
| E1 | TKW | 7A | AX.89634952 | 2.32E+08 | 0.31 | -0.93 | 3.17 | 0.05 |
| E1 | TKW | 7A | AX.89709135 | 2.32E+08 | 0.31 | -0.93 | 3.17 | 0.05 |
| E1 | TKW | 7A | AX.89432005 | 1.70E+08 | 0.11 | -1.50 | 3.78 | 0.06 |
| E1 | TKW | 7A | AX.89447098 | 1.67E+08 | 0.10 | -1.63 | 4.07 | 0.07 |
| E1 | TKW | 7A | AX.89323262 | 1.76E+08 | 0.11 | -1.50 | 3.63 | 0.06 |
| E1 | TKW | 7A | AX.89323535 | 1.45E+08 | 0.10 | -1.52 | 3.61 | 0.06 |
| E1 | TKW | 7A | AX.89540761 | 1.73E+08 | 0.12 | -1.33 | 3.23 | 0.05 |
| E1 | TKW | 7A | AX.89532761 | 2.30E+08 | 0.31 | -0.93 | 3.17 | 0.05 |
| E1 | TKW | 7A | AX.89532911 | 2.03E+08 | 0.10 | -1.52 | 3.47 | 0.06 |
| E1 | TKW | 7A | AX.89741785 | 1.76E+08 | 0.10 | -1.37 | 3.00 | 0.05 |
| E1 | TKW | 7A | AX.89371928 | 1.73E+08 | 0.12 | -1.40 | 3.44 | 0.06 |
| E1 | TKW | 7A | AX.89604136 | 2.11E+08 | 0.10 | -1.43 | 3.25 | 0.05 |

|    |      |    |             |          |      |        |      |      |
|----|------|----|-------------|----------|------|--------|------|------|
| E1 | TKW  | 7A | AX.89548350 | 1.67E+08 | 0.11 | -1.38  | 3.15 | 0.05 |
| E1 | TKW  | 7A | AX.89409314 | 1.48E+08 | 0.35 | -0.90  | 3.17 | 0.05 |
| E1 | TKW  | 7A | AX.89636079 | 9.19E+07 | 0.15 | -1.61  | 5.29 | 0.09 |
| E1 | TKW  | 7A | AX.89718731 | 1.49E+08 | 0.11 | -1.50  | 3.78 | 0.06 |
| E1 | TKW  | 7A | AX.89684994 | 1.76E+08 | 0.10 | -1.37  | 3.00 | 0.05 |
| E1 | TKW  | 7A | AX.89660543 | 1.48E+08 | 0.10 | -1.44  | 3.29 | 0.05 |
| E1 | TKW  | 7A | AX.89333364 | 1.51E+08 | 0.11 | -1.38  | 3.15 | 0.05 |
| E1 | TKW  | 7A | AX.89775885 | 1.40E+08 | 0.11 | -1.50  | 3.78 | 0.06 |
| E1 | TKW  | 7A | AX.89694097 | 1.51E+08 | 0.11 | -1.50  | 3.78 | 0.06 |
| E1 | TKW  | 7A | AX.89502947 | 1.97E+08 | 0.10 | -1.45  | 3.31 | 0.05 |
| E1 | TKW  | 7A | AX.89417340 | 1.45E+08 | 0.11 | -1.45  | 3.46 | 0.06 |
| E1 | TKW  | 7A | AX.89661146 | 1.62E+08 | 0.10 | -1.43  | 3.25 | 0.05 |
| E1 | TKW  | 7A | AX.89527321 | 1.93E+08 | 0.45 | 0.92   | 3.55 | 0.06 |
| E1 | TKW  | 7A | AX.89661403 | 2.24E+08 | 0.30 | -0.91  | 3.06 | 0.05 |
| E1 | TKW  | 7A | AX.89750454 | 1.76E+08 | 0.11 | -1.50  | 3.63 | 0.06 |
| E1 | TKW  | 7A | AX.89727290 | 1.54E+08 | 0.11 | -1.50  | 3.78 | 0.06 |
| E1 | TKW  | 7A | AX.89433593 | 1.55E+08 | 0.10 | -1.43  | 3.25 | 0.05 |
| E1 | TKW  | 7A | AX.89620706 | 1.60E+08 | 0.11 | -1.45  | 3.46 | 0.06 |
| E1 | TKW  | 7A | AX.89503637 | 1.64E+08 | 0.14 | -1.35  | 3.79 | 0.06 |
| E1 | TKW  | 7A | AX.89743697 | 1.40E+08 | 0.11 | -1.50  | 3.78 | 0.06 |
| E1 | TKW  | 7A | AX.89686253 | 1.66E+08 | 0.10 | -1.39  | 3.01 | 0.05 |
| E1 | TKW  | 7A | AX.89362870 | 1.66E+08 | 0.11 | -1.38  | 3.15 | 0.05 |
| E1 | TKW  | 7A | AX.89346719 | 1.42E+08 | 0.11 | -1.38  | 3.15 | 0.05 |
| E1 | TKW  | 7A | AX.89695562 | 2.25E+08 | 0.30 | -0.91  | 3.06 | 0.05 |
| E1 | TKW  | 7A | AX.89703421 | 1.76E+08 | 0.11 | -1.50  | 3.63 | 0.06 |
| E1 | TKW  | 7A | AX.89425836 | 2.11E+08 | 0.10 | -1.43  | 3.25 | 0.05 |
| E1 | TKW  | 7A | AX.89314613 | 9.66E+07 | 0.09 | -1.57  | 3.39 | 0.06 |
| E1 | TKW  | 7A | AX.89777419 | 1.59E+08 | 0.11 | -1.50  | 3.78 | 0.06 |
| E1 | TKW  | 7A | AX.89573384 | 1.67E+08 | 0.10 | -1.63  | 4.07 | 0.07 |
| E1 | TKW  | 7A | AX.89481678 | 1.57E+08 | 0.10 | -1.43  | 3.25 | 0.05 |
| E1 | TKW  | 7A | AX.89728136 | 1.49E+08 | 0.11 | -1.50  | 3.78 | 0.06 |
| E1 | TKW  | 7A | AX.89550173 | 2.28E+08 | 0.30 | -0.91  | 3.06 | 0.05 |
| E1 | TKW  | 7A | AX.89472576 | 2.00E+08 | 0.09 | -1.58  | 3.59 | 0.06 |
| E1 | TKW  | 7A | AX.89379269 | 1.46E+08 | 0.11 | -1.50  | 3.78 | 0.06 |
| E1 | TKW  | 7A | AX.89720892 | 1.39E+08 | 0.10 | -1.50  | 3.41 | 0.06 |
| E1 | TKW  | 7A | AX.89355529 | 1.62E+08 | 0.10 | -1.43  | 3.25 | 0.05 |
| E1 | TKW  | 7A | AX.89566441 | 1.63E+08 | 0.11 | -1.38  | 3.15 | 0.05 |
| E1 | GPM2 | 7A | AX.89643578 | 1.99E+08 | 0.31 | 665.20 | 3.33 | 0.06 |
| E1 | TKW  | 7A | AX.89369485 | 1.63E+08 | 0.11 | -1.50  | 3.78 | 0.06 |
| E1 | TKW  | 7A | AX.89582172 | 2.27E+08 | 0.30 | -0.91  | 3.06 | 0.05 |
| E1 | TKW  | 7A | AX.89663097 | 1.72E+08 | 0.10 | -1.45  | 3.31 | 0.05 |
| E1 | TKW  | 7A | AX.89744801 | 1.56E+08 | 0.10 | -1.43  | 3.25 | 0.05 |
| E1 | TKW  | 7A | AX.89591031 | 1.69E+08 | 0.11 | -1.45  | 3.46 | 0.06 |
| E1 | TKW  | 7A | AX.89559099 | 1.72E+08 | 0.11 | -1.50  | 3.63 | 0.06 |
| E1 | TKW  | 7A | AX.89457362 | 1.51E+08 | 0.10 | -1.43  | 3.25 | 0.05 |
| E1 | TKW  | 7A | AX.89569564 | 1.51E+08 | 0.11 | -1.38  | 3.15 | 0.05 |
| E1 | TKW  | 7A | AX.89607869 | 1.51E+08 | 0.11 | -1.36  | 3.20 | 0.05 |
| E1 | TKW  | 7A | AX.89326653 | 1.74E+08 | 0.11 | -1.34  | 3.10 | 0.05 |
| E1 | TKW  | 7A | AX.89655516 | 2.03E+08 | 0.10 | -1.52  | 3.47 | 0.06 |
| E1 | TKW  | 7A | AX.89745264 | 1.61E+08 | 0.10 | -1.43  | 3.25 | 0.05 |

|    |     |    |             |          |      |       |      |      |
|----|-----|----|-------------|----------|------|-------|------|------|
| E1 | TKW | 7A | AX.89630617 | 1.33E+08 | 0.11 | -1.41 | 3.37 | 0.06 |
| E1 | TKW | 7A | AX.89650308 | 1.75E+08 | 0.11 | -1.34 | 3.10 | 0.05 |
| E1 | TKW | 7A | AX.89575195 | 1.59E+08 | 0.10 | -1.43 | 3.25 | 0.05 |
| E1 | TKW | 7A | AX.89664370 | 1.55E+08 | 0.10 | -1.43 | 3.25 | 0.05 |
| E1 | TKW | 7A | AX.89474147 | 1.67E+08 | 0.11 | -1.45 | 3.46 | 0.06 |
| E1 | TKW | 7A | AX.89544126 | 1.38E+08 | 0.12 | -1.53 | 4.01 | 0.07 |
| E1 | TKW | 7A | AX.89745832 | 1.35E+08 | 0.10 | -1.44 | 3.29 | 0.05 |
| E1 | TKW | 7A | AX.89373050 | 1.55E+08 | 0.11 | -1.50 | 3.78 | 0.06 |
| E1 | TKW | 7A | AX.89443993 | 1.66E+08 | 0.11 | -1.50 | 3.78 | 0.06 |
| E1 | TKW | 7A | AX.89639374 | 1.63E+08 | 0.11 | -1.50 | 3.78 | 0.06 |
| E1 | TKW | 7A | AX.89428744 | 1.45E+08 | 0.11 | -1.50 | 3.78 | 0.06 |
| E1 | TKW | 7A | AX.89664945 | 1.63E+08 | 0.11 | -1.50 | 3.78 | 0.06 |
| E1 | TKW | 7A | AX.89491168 | 1.67E+08 | 0.10 | -1.63 | 4.07 | 0.07 |
| E1 | TKW | 7A | AX.89600921 | 2.44E+08 | 0.47 | -0.97 | 3.93 | 0.07 |
| E1 | TKW | 7A | AX.89349756 | 6.72E+08 | 0.16 | -1.15 | 3.14 | 0.05 |
| E1 | TKW | 7A | AX.89397250 | 2.11E+08 | 0.10 | -1.43 | 3.25 | 0.05 |
| E1 | TKW | 7A | AX.89717422 | 1.47E+08 | 0.10 | -1.37 | 3.03 | 0.05 |
| E1 | TKW | 7A | AX.89327748 | 1.43E+08 | 0.11 | -1.56 | 3.90 | 0.07 |
| E1 | TKW | 7A | AX.89563839 | 6.48E+08 | 0.22 | -1.17 | 3.97 | 0.07 |
| E1 | TKW | 7A | AX.89689917 | 1.27E+08 | 0.10 | -1.40 | 3.01 | 0.05 |
| E1 | TKW | 7A | AX.89545256 | 1.68E+08 | 0.11 | -1.50 | 3.78 | 0.06 |
| E1 | TKW | 7A | AX.89452043 | 1.69E+08 | 0.11 | -1.50 | 3.78 | 0.06 |
| E1 | TKW | 7A | AX.89563909 | 1.30E+08 | 0.11 | -1.48 | 3.69 | 0.07 |
| E1 | TKW | 7A | AX.89568895 | 1.50E+08 | 0.11 | -1.50 | 3.78 | 0.06 |
| E1 | TKW | 7A | AX.89763564 | 1.66E+08 | 0.10 | -1.44 | 3.29 | 0.05 |
| E1 | TKW | 7A | AX.89513578 | 1.43E+08 | 0.11 | -1.56 | 3.90 | 0.07 |
| E1 | TKW | 7A | AX.89511123 | 1.39E+08 | 0.11 | -1.57 | 3.94 | 0.07 |
| E1 | TKW | 7A | AX.89406163 | 1.43E+08 | 0.11 | -1.50 | 3.78 | 0.06 |
| E1 | TKW | 7A | AX.89627562 | 1.39E+08 | 0.12 | -1.53 | 4.01 | 0.07 |
| E1 | TKW | 7A | AX.89475948 | 1.39E+08 | 0.12 | -1.53 | 4.01 | 0.07 |
| E1 | TKW | 7A | AX.89335527 | 1.67E+08 | 0.10 | -1.63 | 4.07 | 0.07 |
| E1 | TKW | 7A | AX.89707225 | 1.38E+08 | 0.11 | -1.41 | 3.37 | 0.06 |
| E1 | TKW | 7A | AX.89459897 | 1.57E+08 | 0.11 | -1.50 | 3.78 | 0.06 |
| E1 | TKW | 7A | AX.89369888 | 1.51E+08 | 0.11 | -1.38 | 3.15 | 0.05 |
| E1 | TKW | 7A | AX.89499809 | 9.31E+07 | 0.14 | -1.56 | 4.76 | 0.08 |
| E1 | TKW | 7A | AX.89524295 | 1.63E+08 | 0.11 | -1.38 | 3.15 | 0.05 |
| E1 | TKW | 7A | AX.89669263 | 1.50E+08 | 0.11 | -1.56 | 3.90 | 0.07 |
| E1 | TKW | 7A | AX.89508516 | 1.71E+08 | 0.11 | -1.50 | 3.78 | 0.06 |
| E1 | TKW | 7A | AX.89577598 | 1.48E+08 | 0.12 | -1.35 | 3.25 | 0.05 |
| E1 | TKW | 7A | AX.89551804 | 1.68E+08 | 0.11 | -1.50 | 3.78 | 0.06 |
| E1 | TKW | 7A | AX.89367738 | 1.62E+08 | 0.11 | -1.50 | 3.78 | 0.06 |
| E1 | TKW | 7A | AX.89675595 | 1.95E+08 | 0.10 | -1.55 | 3.75 | 0.06 |
| E1 | TKW | 7A | AX.89367776 | 1.30E+08 | 0.11 | -1.41 | 3.37 | 0.06 |
| E1 | TKW | 7A | AX.89480189 | 1.45E+08 | 0.10 | -1.44 | 3.29 | 0.05 |
| E1 | TKW | 7A | AX.89740641 | 1.41E+08 | 0.11 | -1.50 | 3.78 | 0.06 |
| E1 | TKW | 7A | AX.89645283 | 6.48E+08 | 0.22 | -1.17 | 3.97 | 0.07 |
| E1 | TKW | 7A | AX.89322960 | 1.48E+08 | 0.11 | -1.38 | 3.15 | 0.05 |
| E1 | TKW | 7A | AX.89368878 | 1.32E+08 | 0.11 | -1.46 | 3.48 | 0.06 |
| E1 | TKW | 7A | AX.89418127 | 1.43E+08 | 0.11 | -1.50 | 3.78 | 0.06 |
| E1 | TKW | 7A | AX.89659553 | 2.44E+08 | 0.47 | -0.97 | 3.93 | 0.07 |

|    |     |    |             |          |      |       |      |      |
|----|-----|----|-------------|----------|------|-------|------|------|
| E1 | TKW | 7A | AX.89469383 | 1.73E+08 | 0.11 | -1.50 | 3.63 | 0.06 |
| E1 | TKW | 7A | AX.89408537 | 1.45E+08 | 0.07 | -1.79 | 3.72 | 0.06 |
| E1 | TKW | 7A | AX.89494213 | 1.64E+08 | 0.11 | -1.50 | 3.78 | 0.06 |
| E1 | TKW | 7A | AX.89571307 | 1.76E+08 | 0.10 | -1.37 | 3.00 | 0.05 |
| E1 | TKW | 7A | AX.89518189 | 1.62E+08 | 0.10 | -1.43 | 3.25 | 0.05 |
| E1 | TKW | 7A | AX.89423849 | 1.35E+08 | 0.11 | -1.59 | 4.03 | 0.07 |
| E1 | TKW | 7A | AX.89408717 | 2.11E+08 | 0.11 | -1.50 | 3.78 | 0.06 |
| E1 | TKW | 7A | AX.89696524 | 1.67E+08 | 0.11 | -1.50 | 3.78 | 0.06 |
| E1 | TKW | 7A | AX.89472880 | 1.37E+08 | 0.12 | -1.53 | 4.01 | 0.07 |
| E1 | TKW | 7A | AX.89710011 | 1.30E+08 | 0.11 | -1.46 | 3.48 | 0.06 |
| E1 | TKW | 7A | AX.89326328 | 1.43E+08 | 0.11 | -1.50 | 3.78 | 0.06 |
| E1 | TKW | 7A | AX.89513655 | 1.63E+08 | 0.11 | -1.38 | 3.15 | 0.05 |
| E1 | TKW | 7A | AX.89377277 | 9.29E+07 | 0.07 | -1.90 | 4.14 | 0.07 |
| E1 | TKW | 7A | AX.89439967 | 1.49E+08 | 0.10 | -1.43 | 3.25 | 0.05 |
| E1 | TKW | 7A | AX.89596485 | 1.46E+08 | 0.10 | -1.44 | 3.29 | 0.05 |
| E1 | TKW | 7A | AX.89340879 | 1.48E+08 | 0.10 | -1.44 | 3.29 | 0.05 |
| E1 | TKW | 7A | AX.89440500 | 1.74E+08 | 0.11 | -1.50 | 3.63 | 0.06 |
| E1 | TKW | 7A | AX.89361870 | 2.03E+08 | 0.15 | -1.58 | 5.14 | 0.09 |
| E1 | TKW | 7A | AX.89572652 | 1.62E+08 | 0.11 | -1.38 | 3.15 | 0.05 |
| E1 | TKW | 7A | AX.89737723 | 1.55E+08 | 0.12 | -1.42 | 3.65 | 0.06 |
| E1 | TKW | 7A | AX.89653667 | 9.31E+07 | 0.14 | -1.56 | 4.76 | 0.08 |
| E1 | TKW | 7A | AX.89490858 | 1.35E+08 | 0.12 | -1.53 | 4.01 | 0.07 |
| E1 | TKW | 7A | AX.86184384 | 2.27E+08 | 0.30 | -0.91 | 3.06 | 0.05 |
| E1 | TKW | 7A | AX.89720292 | 1.55E+08 | 0.11 | -1.38 | 3.15 | 0.05 |
| E1 | TKW | 7A | AX.89534609 | 1.49E+08 | 0.11 | -1.50 | 3.78 | 0.06 |
| E1 | TKW | 7A | AX.89554802 | 1.45E+08 | 0.11 | -1.51 | 3.68 | 0.06 |
| E1 | TKW | 7A | AX.89648084 | 1.63E+08 | 0.11 | -1.38 | 3.15 | 0.05 |
| E1 | TKW | 7A | AX.89746290 | 1.62E+08 | 0.11 | -1.38 | 3.15 | 0.05 |
| E1 | TKW | 7A | AX.89441396 | 1.67E+08 | 0.11 | -1.50 | 3.78 | 0.06 |
| E1 | TKW | 7A | AX.89327554 | 1.72E+06 | 0.25 | -1.02 | 3.38 | 0.06 |
| E1 | TKW | 7A | AX.89628948 | 2.44E+08 | 0.48 | -0.95 | 3.80 | 0.06 |
| E1 | TKW | 7A | AX.89698185 | 1.49E+08 | 0.11 | -1.50 | 3.78 | 0.06 |
| E1 | TKW | 7A | AX.89733438 | 2.33E+08 | 0.31 | -0.91 | 3.09 | 0.05 |
| E1 | TKW | 7A | AX.89629771 | 1.37E+08 | 0.12 | -1.53 | 4.01 | 0.07 |
| E1 | TKW | 7A | AX.89363891 | 1.73E+08 | 0.10 | -1.41 | 3.17 | 0.05 |
| E1 | TKW | 7A | AX.89768978 | 1.74E+08 | 0.11 | -1.50 | 3.63 | 0.06 |
| E1 | TKW | 7A | AX.89763557 | 1.32E+08 | 0.11 | -1.48 | 3.69 | 0.07 |
| E1 | TKW | 7A | AX.89555800 | 1.35E+08 | 0.11 | -1.41 | 3.37 | 0.06 |
| E1 | TKW | 7A | AX.89573739 | 1.67E+08 | 0.11 | -1.38 | 3.15 | 0.05 |
| E1 | TKW | 7A | AX.89518535 | 1.46E+08 | 0.10 | -1.44 | 3.29 | 0.05 |
| E1 | TKW | 7A | AX.89582185 | 1.30E+08 | 0.11 | -1.45 | 3.46 | 0.06 |
| E1 | TKW | 7A | AX.89347924 | 1.49E+08 | 0.11 | -1.56 | 3.90 | 0.07 |
| E1 | TKW | 7A | AX.89558931 | 2.44E+08 | 0.47 | -0.97 | 3.93 | 0.07 |
| E1 | TKW | 7A | AX.89505008 | 2.26E+08 | 0.30 | -0.91 | 3.06 | 0.05 |
| E1 | TKW | 7A | AX.89744846 | 1.52E+08 | 0.11 | -1.38 | 3.15 | 0.05 |
| E1 | TKW | 7A | AX.89355942 | 1.43E+08 | 0.11 | -1.50 | 3.78 | 0.06 |
| E1 | TKW | 7A | AX.89574177 | 1.63E+08 | 0.11 | -1.50 | 3.78 | 0.06 |
| E1 | TKW | 7A | AX.89582619 | 1.52E+08 | 0.11 | -1.38 | 3.15 | 0.05 |
| E1 | TKW | 7A | AX.89335559 | 1.39E+08 | 0.10 | -1.50 | 3.41 | 0.06 |
| E1 | TKW | 7A | AX.89382013 | 1.36E+08 | 0.12 | -1.53 | 4.01 | 0.07 |

|    |     |    |             |          |      |       |      |      |
|----|-----|----|-------------|----------|------|-------|------|------|
| E1 | TKW | 7A | AX.89505562 | 1.63E+08 | 0.11 | -1.50 | 3.78 | 0.06 |
| E1 | TKW | 7A | AX.89641393 | 1.72E+08 | 0.11 | -1.50 | 3.78 | 0.06 |
| E1 | TKW | 7A | AX.89729445 | 1.71E+08 | 0.11 | -1.50 | 3.78 | 0.06 |
| E1 | TKW | 7A | AX.89414772 | 1.59E+08 | 0.11 | -1.38 | 3.15 | 0.05 |
| E1 | TKW | 7A | AX.89727583 | 2.25E+08 | 0.30 | -0.91 | 3.06 | 0.05 |
| E1 | TKW | 7A | AX.89729680 | 1.68E+08 | 0.10 | -1.63 | 4.07 | 0.07 |
| E1 | TKW | 7A | AX.89705453 | 1.56E+08 | 0.10 | -1.43 | 3.25 | 0.05 |
| E1 | TKW | 7A | AX.89697740 | 1.44E+08 | 0.11 | -1.50 | 3.78 | 0.06 |
| E1 | TKW | 7A | AX.89554236 | 1.48E+08 | 0.11 | -1.57 | 3.94 | 0.07 |
| E1 | TKW | 7A | AX.89680047 | 1.35E+08 | 0.10 | -1.44 | 3.29 | 0.05 |
| E1 | TKW | 7A | AX.89524884 | 1.76E+08 | 0.11 | -1.50 | 3.63 | 0.06 |
| E1 | TKW | 7A | AX.89506226 | 1.36E+08 | 0.11 | -1.57 | 3.94 | 0.07 |
| E1 | TKW | 7A | AX.89536720 | 1.49E+08 | 0.11 | -1.50 | 3.78 | 0.06 |
| E1 | TKW | 7A | AX.89466043 | 1.38E+08 | 0.11 | -1.48 | 3.69 | 0.07 |
| E1 | TKW | 7A | AX.89639432 | 1.74E+08 | 0.11 | -1.50 | 3.63 | 0.06 |
| E1 | TKW | 7A | AX.89425258 | 1.75E+08 | 0.10 | -1.45 | 3.31 | 0.05 |
| E1 | TKW | 7A | AX.89735671 | 1.49E+08 | 0.11 | -1.50 | 3.78 | 0.06 |
| E1 | TKW | 7A | AX.89738580 | 1.48E+08 | 0.11 | -1.38 | 3.15 | 0.05 |
| E1 | TKW | 7A | AX.89417939 | 1.33E+08 | 0.11 | -1.46 | 3.48 | 0.06 |
| E1 | TKW | 7A | AX.89725327 | 1.38E+08 | 0.12 | -1.53 | 4.01 | 0.07 |
| E1 | TKW | 7A | AX.89352685 | 1.45E+08 | 0.11 | -1.50 | 3.78 | 0.06 |
| E1 | TKW | 7A | AX.89394873 | 1.63E+08 | 0.11 | -1.44 | 3.41 | 0.06 |
| E1 | TKW | 7A | AX.89537751 | 1.63E+08 | 0.11 | -1.50 | 3.78 | 0.06 |
| E1 | TKW | 7A | AX.89439172 | 1.31E+08 | 0.12 | -1.53 | 4.01 | 0.07 |
| E1 | TKW | 7A | AX.89701002 | 1.45E+08 | 0.10 | -1.44 | 3.29 | 0.05 |
| E1 | TKW | 7A | AX.89459148 | 1.63E+08 | 0.11 | -1.38 | 3.15 | 0.05 |
| E1 | TKW | 7A | AX.89401078 | 1.33E+08 | 0.12 | -1.53 | 4.01 | 0.07 |
| E1 | TKW | 7A | AX.89601469 | 1.02E+08 | 0.09 | -1.57 | 3.39 | 0.06 |
| E1 | TKW | 7A | AX.89392172 | 1.49E+08 | 0.11 | -1.50 | 3.78 | 0.06 |
| E1 | TKW | 7A | AX.89510504 | 1.50E+08 | 0.10 | -1.43 | 3.25 | 0.05 |
| E1 | TKW | 7A | AX.89345107 | 1.43E+08 | 0.10 | -1.43 | 3.25 | 0.05 |
| E1 | TKW | 7A | AX.89578138 | 1.48E+08 | 0.10 | -1.44 | 3.29 | 0.05 |
| E1 | TKW | 7A | AX.89743153 | 9.25E+07 | 0.13 | -1.75 | 5.70 | 0.10 |
| E1 | TKW | 7A | AX.89461963 | 2.26E+08 | 0.30 | -0.91 | 3.06 | 0.05 |
| E1 | TKW | 7A | AX.89369711 | 1.66E+08 | 0.11 | -1.50 | 3.78 | 0.06 |
| E1 | TKW | 7A | AX.89541396 | 1.55E+08 | 0.10 | -1.43 | 3.25 | 0.05 |
| E1 | TKW | 7A | AX.89452691 | 1.44E+08 | 0.11 | -1.50 | 3.78 | 0.06 |
| E1 | TKW | 7A | AX.89460095 | 1.73E+08 | 0.11 | -1.50 | 3.63 | 0.06 |
| E1 | TKW | 7A | AX.89743151 | 1.76E+08 | 0.11 | -1.50 | 3.63 | 0.06 |
| E1 | TKW | 7A | AX.89757701 | 9.76E+07 | 0.12 | -1.68 | 4.90 | 0.09 |
| E1 | TKW | 7A | AX.89661348 | 1.58E+08 | 0.14 | -1.45 | 4.18 | 0.07 |
| E1 | TKW | 7A | AX.89650913 | 2.32E+08 | 0.31 | -0.93 | 3.17 | 0.05 |
| E1 | TKW | 7A | AX.89400115 | 9.19E+07 | 0.12 | -1.75 | 5.09 | 0.09 |
| E1 | TKW | 7A | AX.89560296 | 2.12E+08 | 0.11 | -1.38 | 3.15 | 0.05 |
| E1 | TKW | 7A | AX.89509226 | 1.45E+08 | 0.11 | -1.38 | 3.15 | 0.05 |
| E1 | TKW | 7A | AX.89725084 | 1.68E+08 | 0.11 | -1.56 | 3.90 | 0.07 |
| E1 | TKW | 7A | AX.86163778 | 1.41E+08 | 0.10 | -1.43 | 3.25 | 0.05 |
| E1 | TKW | 7A | AX.89418697 | 1.59E+08 | 0.10 | -1.43 | 3.25 | 0.05 |
| E1 | TKW | 7A | AX.89446661 | 1.28E+08 | 0.09 | -1.47 | 3.16 | 0.05 |
| E1 | TKW | 7A | AX.89325529 | 1.66E+08 | 0.11 | -1.38 | 3.15 | 0.05 |

|    |     |    |             |          |      |       |      |      |
|----|-----|----|-------------|----------|------|-------|------|------|
| E1 | TKW | 7A | AX.89493915 | 1.76E+08 | 0.10 | -1.37 | 3.00 | 0.05 |
| E1 | TKW | 7A | AX.89711943 | 2.44E+08 | 0.47 | -0.96 | 3.83 | 0.07 |
| E1 | TKW | 7A | AX.89456715 | 1.38E+08 | 0.10 | -1.50 | 3.41 | 0.06 |
| E1 | TKW | 7A | AX.89510314 | 2.32E+08 | 0.31 | -0.93 | 3.17 | 0.05 |
| E1 | TKW | 7A | AX.89701284 | 1.38E+08 | 0.10 | -1.50 | 3.41 | 0.06 |
| E1 | TKW | 7A | AX.89687304 | 1.69E+08 | 0.11 | -1.50 | 3.78 | 0.06 |
| E1 | TKW | 7A | AX.89515695 | 1.76E+08 | 0.11 | -1.50 | 3.63 | 0.06 |
| E1 | TKW | 7A | AX.89777832 | 9.29E+07 | 0.13 | -1.75 | 5.70 | 0.10 |
| E1 | TKW | 7A | AX.89392694 | 1.39E+08 | 0.11 | -1.41 | 3.37 | 0.06 |
| E1 | TKW | 7A | AX.89352236 | 1.28E+08 | 0.11 | -1.50 | 3.76 | 0.07 |
| E1 | TKW | 7A | AX.89533208 | 1.63E+08 | 0.11 | -1.50 | 3.78 | 0.06 |
| E1 | TKW | 7A | AX.89566598 | 1.30E+08 | 0.10 | -1.41 | 3.16 | 0.06 |
| E1 | TKW | 7A | AX.89668798 | 2.38E+08 | 0.33 | -0.92 | 3.20 | 0.05 |
| E1 | TKW | 7A | AX.89403650 | 1.39E+08 | 0.11 | -1.55 | 3.87 | 0.07 |
| E1 | TKW | 7A | AX.89644044 | 9.19E+07 | 0.07 | -1.86 | 3.79 | 0.06 |
| E1 | TKW | 7A | AX.89526781 | 1.62E+08 | 0.11 | -1.38 | 3.15 | 0.05 |
| E1 | TKW | 7A | AX.89440021 | 1.39E+08 | 0.11 | -1.58 | 4.13 | 0.07 |
| E1 | TKW | 7A | AX.89353567 | 1.73E+08 | 0.12 | -1.38 | 3.38 | 0.06 |
| E1 | TKW | 7A | AX.89507903 | 1.68E+08 | 0.10 | -1.63 | 4.07 | 0.07 |
| E1 | TKW | 7A | AX.89747648 | 1.67E+08 | 0.10 | -1.63 | 4.07 | 0.07 |
| E1 | TKW | 7A | AX.89343295 | 1.54E+08 | 0.11 | -1.38 | 3.15 | 0.05 |
| E1 | TKW | 7A | AX.89658380 | 1.48E+08 | 0.11 | -1.38 | 3.15 | 0.05 |
| E1 | TKW | 7A | AX.89644324 | 1.62E+08 | 0.10 | -1.43 | 3.25 | 0.05 |
| E1 | TKW | 7A | AX.89638456 | 1.48E+08 | 0.11 | -1.50 | 3.78 | 0.06 |
| E1 | TKW | 7A | AX.89456317 | 1.29E+08 | 0.10 | -1.63 | 4.07 | 0.07 |
| E1 | TKW | 7A | AX.89750957 | 1.59E+08 | 0.11 | -1.38 | 3.15 | 0.05 |
| E1 | TKW | 7A | AX.89518578 | 1.63E+08 | 0.11 | -1.38 | 3.15 | 0.05 |
| E1 | TKW | 7A | AX.89383267 | 1.46E+08 | 0.11 | -1.38 | 3.15 | 0.05 |
| E1 | TKW | 7A | AX.89729776 | 1.38E+08 | 0.11 | -1.48 | 3.69 | 0.07 |
| E1 | TKW | 7A | AX.89385563 | 1.40E+08 | 0.12 | -1.53 | 4.01 | 0.07 |
| E1 | TKW | 7A | AX.89559022 | 1.71E+08 | 0.11 | -1.50 | 3.78 | 0.06 |
| E1 | TKW | 7A | AX.89676558 | 1.48E+08 | 0.11 | -1.45 | 3.46 | 0.06 |
| E1 | TKW | 7A | AX.89565485 | 1.43E+08 | 0.11 | -1.38 | 3.15 | 0.05 |
| E1 | TKW | 7A | AX.89497985 | 1.59E+08 | 0.10 | -1.43 | 3.25 | 0.05 |
| E1 | TKW | 7A | AX.89759971 | 1.63E+08 | 0.11 | -1.50 | 3.78 | 0.06 |
| E1 | TKW | 7A | AX.89657659 | 1.51E+08 | 0.11 | -1.38 | 3.15 | 0.05 |
| E1 | TKW | 7A | AX.89775549 | 1.76E+08 | 0.11 | -1.50 | 3.63 | 0.06 |
| E1 | TKW | 7A | AX.89419990 | 1.59E+08 | 0.10 | -1.43 | 3.25 | 0.05 |
| E1 | TKW | 7A | AX.89767293 | 1.52E+08 | 0.10 | -1.43 | 3.25 | 0.05 |
| E1 | TKW | 7A | AX.89737812 | 1.46E+08 | 0.10 | -1.44 | 3.29 | 0.05 |
| E1 | TKW | 7A | AX.89570703 | 1.49E+08 | 0.11 | -1.56 | 3.90 | 0.07 |
| E1 | TKW | 7A | AX.89720425 | 2.29E+08 | 0.31 | -0.93 | 3.17 | 0.05 |
| E1 | TKW | 7A | AX.89726540 | 1.65E+08 | 0.11 | -1.50 | 3.78 | 0.06 |
| E1 | TKW | 7A | AX.89679375 | 1.62E+08 | 0.11 | -1.38 | 3.15 | 0.05 |
| E1 | TKW | 7A | AX.89709005 | 1.72E+08 | 0.11 | -1.50 | 3.63 | 0.06 |
| E1 | TKW | 7A | AX.89516555 | 1.37E+08 | 0.12 | -1.53 | 4.01 | 0.07 |
| E1 | TKW | 7A | AX.89524740 | 1.57E+08 | 0.10 | -1.43 | 3.25 | 0.05 |
| E1 | TKW | 7A | AX.89350449 | 2.31E+08 | 0.31 | -0.97 | 3.43 | 0.06 |
| E1 | TKW | 7A | AX.89327973 | 1.62E+08 | 0.41 | 0.86  | 3.10 | 0.05 |
| E1 | TKW | 7A | AX.89607233 | 2.02E+08 | 0.37 | 0.97  | 3.70 | 0.06 |

|    |     |    |             |          |      |       |      |      |
|----|-----|----|-------------|----------|------|-------|------|------|
| E1 | TKW | 7A | AX.89676560 | 1.50E+08 | 0.10 | -1.43 | 3.25 | 0.05 |
| E1 | TKW | 7A | AX.89624899 | 1.45E+08 | 0.11 | -1.38 | 3.15 | 0.05 |
| E1 | TKW | 7A | AX.89676721 | 1.44E+08 | 0.11 | -1.50 | 3.78 | 0.06 |
| E1 | TKW | 7A | AX.89551283 | 1.49E+08 | 0.11 | -1.50 | 3.78 | 0.06 |
| E1 | TKW | 7A | AX.89655678 | 1.63E+08 | 0.11 | -1.38 | 3.15 | 0.05 |
| E1 | TKW | 7A | AX.89490919 | 1.43E+08 | 0.11 | -1.50 | 3.78 | 0.06 |
| E1 | TKW | 7A | AX.89752260 | 1.33E+08 | 0.11 | -1.46 | 3.48 | 0.06 |
| E1 | TKW | 7A | AX.89553835 | 1.65E+08 | 0.12 | -1.45 | 3.67 | 0.06 |
| E1 | TKW | 7A | AX.89731965 | 1.30E+08 | 0.11 | -1.48 | 3.69 | 0.07 |
| E1 | TKW | 7A | AX.89716253 | 9.30E+07 | 0.10 | -1.55 | 3.58 | 0.06 |
| E1 | TKW | 7A | AX.89326454 | 1.58E+08 | 0.10 | -1.43 | 3.25 | 0.05 |
| E1 | TKW | 7A | AX.89633286 | 1.49E+08 | 0.11 | -1.56 | 3.90 | 0.07 |
| E1 | TKW | 7A | AX.89749810 | 1.55E+08 | 0.11 | -1.50 | 3.78 | 0.06 |
| E1 | TKW | 7A | AX.89661750 | 1.39E+08 | 0.10 | -1.63 | 4.07 | 0.07 |
| E1 | TKW | 7A | AX.89748513 | 1.59E+08 | 0.10 | -1.43 | 3.25 | 0.05 |
| E1 | TKW | 7A | AX.89516270 | 9.21E+07 | 0.13 | -1.75 | 5.70 | 0.10 |
| E1 | TKW | 7A | AX.89438156 | 9.31E+07 | 0.09 | -1.52 | 3.34 | 0.06 |
| E1 | TKW | 7A | AX.89679360 | 9.96E+07 | 0.08 | -1.65 | 3.57 | 0.06 |
| E1 | TKW | 7A | AX.89347950 | 1.72E+08 | 0.10 | -1.51 | 3.57 | 0.06 |
| E1 | TKW | 7A | AX.89410222 | 1.38E+08 | 0.11 | -1.48 | 3.69 | 0.07 |
| E1 | TKW | 7A | AX.89739831 | 9.31E+07 | 0.14 | -1.56 | 4.76 | 0.08 |
| E1 | TKW | 7A | AX.89398554 | 1.39E+08 | 0.10 | -1.50 | 3.41 | 0.06 |
| E1 | TKW | 7A | AX.89617663 | 1.39E+08 | 0.10 | -1.50 | 3.41 | 0.06 |
| E1 | TKW | 7A | AX.89678490 | 2.11E+08 | 0.10 | -1.43 | 3.25 | 0.05 |
| E1 | TKW | 7A | AX.89449940 | 1.48E+08 | 0.11 | -1.57 | 3.94 | 0.07 |
| E1 | TKW | 7A | AX.89536608 | 1.56E+08 | 0.11 | -1.50 | 3.78 | 0.06 |
| E1 | TKW | 7A | AX.89690818 | 1.69E+08 | 0.11 | -1.50 | 3.78 | 0.06 |
| E1 | TKW | 7A | AX.89734863 | 6.72E+08 | 0.17 | -1.15 | 3.28 | 0.06 |
| E1 | TKW | 7A | AX.89773120 | 2.25E+08 | 0.30 | -0.91 | 3.06 | 0.05 |
| E1 | TKW | 7A | AX.89552079 | 2.11E+08 | 0.10 | -1.43 | 3.25 | 0.05 |
| E1 | TKW | 7A | AX.89319483 | 1.75E+08 | 0.11 | -1.50 | 3.63 | 0.06 |
| E1 | TKW | 7A | AX.89569777 | 1.50E+08 | 0.11 | -1.50 | 3.78 | 0.06 |
| E1 | TKW | 7A | AX.89535969 | 1.49E+08 | 0.10 | -1.43 | 3.25 | 0.05 |
| E1 | TKW | 7A | AX.89581078 | 2.11E+08 | 0.10 | -1.43 | 3.25 | 0.05 |
| E1 | TKW | 7A | AX.89715143 | 1.63E+08 | 0.11 | -1.50 | 3.78 | 0.06 |
| E1 | TKW | 7A | AX.89490717 | 9.24E+07 | 0.12 | -1.73 | 5.01 | 0.09 |
| E1 | TKW | 7A | AX.89347387 | 1.64E+08 | 0.10 | -1.50 | 3.41 | 0.06 |
| E1 | TKW | 7A | AX.89457242 | 1.56E+08 | 0.11 | -1.50 | 3.78 | 0.06 |
| E1 | TKW | 7A | AX.89581652 | 1.43E+08 | 0.11 | -1.45 | 3.46 | 0.06 |
| E1 | TKW | 7A | AX.89637523 | 1.63E+08 | 0.11 | -1.50 | 3.78 | 0.06 |
| E1 | TKW | 7A | AX.89643934 | 1.45E+08 | 0.10 | -1.44 | 3.29 | 0.05 |
| E1 | TKW | 7A | AX.89704496 | 1.35E+08 | 0.11 | -1.58 | 4.13 | 0.07 |
| E1 | TKW | 7A | AX.89658338 | 2.26E+08 | 0.30 | -0.91 | 3.06 | 0.05 |
| E1 | TKW | 7A | AX.89585521 | 1.39E+08 | 0.11 | -1.46 | 3.48 | 0.06 |
| E1 | TKW | 7A | AX.89571232 | 1.67E+08 | 0.10 | -1.63 | 4.07 | 0.07 |
| E1 | TKW | 7A | AX.89738339 | 1.74E+08 | 0.11 | -1.50 | 3.63 | 0.06 |
| E1 | TKW | 7A | AX.89633191 | 1.45E+08 | 0.11 | -1.50 | 3.78 | 0.06 |
| E1 | TKW | 7A | AX.89744789 | 2.44E+08 | 0.47 | -0.90 | 3.45 | 0.06 |
| E1 | TKW | 7A | AX.89608997 | 1.54E+08 | 0.11 | -1.50 | 3.78 | 0.06 |
| E1 | TKW | 7A | AX.89500683 | 1.68E+08 | 0.11 | -1.50 | 3.78 | 0.06 |

|    |      |    |             |          |      |        |      |      |
|----|------|----|-------------|----------|------|--------|------|------|
| E1 | TKW  | 7A | AX.89314049 | 1.66E+08 | 0.11 | -1.50  | 3.78 | 0.06 |
| E1 | TKW  | 7A | AX.89391932 | 1.75E+08 | 0.10 | -1.37  | 3.00 | 0.05 |
| E1 | TKW  | 7A | AX.89413488 | 1.28E+08 | 0.11 | -1.50  | 3.76 | 0.07 |
| E1 | TKW  | 7A | AX.89387277 | 1.54E+08 | 0.11 | -1.38  | 3.15 | 0.05 |
| E1 | TKW  | 7A | AX.89365511 | 1.73E+08 | 0.11 | -1.50  | 3.63 | 0.06 |
| E1 | TKW  | 7A | AX.89747041 | 1.36E+08 | 0.12 | -1.53  | 4.01 | 0.07 |
| E1 | TKW  | 7A | AX.89576048 | 1.48E+08 | 0.10 | -1.44  | 3.29 | 0.05 |
| E1 | TKW  | 7A | AX.89763293 | 1.49E+08 | 0.10 | -1.43  | 3.25 | 0.05 |
| E1 | TKW  | 7A | AX.89522975 | 1.58E+08 | 0.10 | -1.43  | 3.25 | 0.05 |
| E1 | TKW  | 7A | AX.89351833 | 1.46E+08 | 0.10 | -1.44  | 3.29 | 0.05 |
| E1 | TKW  | 7A | AX.89445402 | 1.63E+08 | 0.10 | -1.50  | 3.41 | 0.06 |
| E1 | TKW  | 7A | AX.89586652 | 1.63E+08 | 0.11 | -1.50  | 3.78 | 0.06 |
| E1 | TKW  | 7A | AX.89482447 | 1.46E+08 | 0.11 | -1.38  | 3.15 | 0.05 |
| E1 | TKW  | 7A | AX.89620967 | 1.49E+08 | 0.11 | -1.50  | 3.78 | 0.06 |
| E1 | TKW  | 7A | AX.89437456 | 1.01E+08 | 0.09 | -1.57  | 3.39 | 0.06 |
| E1 | TKW  | 7A | AX.89585125 | 1.39E+08 | 0.12 | -1.53  | 4.01 | 0.07 |
| E1 | TKW  | 7A | AX.89401779 | 1.64E+08 | 0.11 | -1.50  | 3.78 | 0.06 |
| E1 | TKW  | 7A | AX.89624159 | 1.61E+08 | 0.11 | -1.50  | 3.78 | 0.06 |
| E1 | TKW  | 7A | AX.89737422 | 1.46E+08 | 0.10 | -1.44  | 3.29 | 0.05 |
| E1 | GPM2 | 7A | AX.89744118 | 6.80E+08 | 0.43 | 601.38 | 3.16 | 0.05 |
| E1 | TKW  | 7A | AX.89665188 | 1.39E+08 | 0.10 | -1.50  | 3.41 | 0.06 |
| E1 | TKW  | 7A | AX.89662020 | 1.39E+08 | 0.10 | -1.50  | 3.41 | 0.06 |
| E1 | TKW  | 7A | AX.89593799 | 1.37E+08 | 0.09 | -1.45  | 3.09 | 0.05 |
| E1 | TKW  | 7A | AX.89340577 | 1.64E+08 | 0.11 | -1.50  | 3.78 | 0.06 |
| E1 | TKW  | 7A | AX.89442360 | 2.45E+08 | 0.47 | -0.97  | 3.93 | 0.07 |
| E1 | TKW  | 7A | AX.89564998 | 1.54E+08 | 0.10 | -1.43  | 3.25 | 0.05 |
| E1 | TKW  | 7A | AX.89318239 | 1.56E+08 | 0.11 | -1.50  | 3.78 | 0.06 |
| E1 | TKW  | 7A | AX.89454979 | 1.59E+08 | 0.10 | -1.43  | 3.25 | 0.05 |
| E1 | GPS  | 7A | AX.89326437 | 5.90E+08 | 0.50 | 1.11   | 3.01 | 0.05 |
| E1 | TKW  | 7A | AX.89774268 | 1.58E+08 | 0.11 | -1.35  | 3.15 | 0.05 |
| E1 | TKW  | 7A | AX.89435711 | 1.66E+08 | 0.11 | -1.50  | 3.78 | 0.06 |
| E1 | TKW  | 7A | AX.89603381 | 1.46E+08 | 0.10 | -1.44  | 3.29 | 0.05 |
| E1 | TKW  | 7A | AX.89463530 | 1.55E+08 | 0.11 | -1.50  | 3.78 | 0.06 |
| E1 | TKW  | 7A | AX.89457168 | 1.44E+08 | 0.14 | -1.45  | 4.18 | 0.07 |
| E1 | TKW  | 7A | AX.89339632 | 1.60E+08 | 0.11 | -1.50  | 3.78 | 0.06 |
| E1 | TKW  | 7A | AX.89723217 | 9.19E+07 | 0.15 | -1.64  | 5.61 | 0.10 |
| E1 | TKW  | 7A | AX.89311121 | 2.25E+08 | 0.30 | -0.91  | 3.06 | 0.05 |
| E1 | TKW  | 7A | AX.89558625 | 1.45E+08 | 0.11 | -1.50  | 3.78 | 0.06 |
| E1 | TKW  | 7A | AX.89450860 | 1.58E+08 | 0.10 | -1.43  | 3.25 | 0.05 |
| E1 | TKW  | 7A | AX.89432963 | 1.76E+08 | 0.11 | -1.50  | 3.63 | 0.06 |
| E1 | TKW  | 7A | AX.89668963 | 1.74E+08 | 0.11 | -1.34  | 3.10 | 0.05 |
| E1 | TKW  | 7A | AX.89556304 | 2.25E+08 | 0.30 | -0.91  | 3.06 | 0.05 |
| E1 | TKW  | 7A | AX.89395703 | 2.12E+08 | 0.10 | -1.43  | 3.25 | 0.05 |
| E1 | TKW  | 7A | AX.89675768 | 1.62E+08 | 0.11 | -1.38  | 3.15 | 0.05 |
| E1 | TKW  | 7A | AX.89505540 | 2.12E+08 | 0.11 | -1.38  | 3.15 | 0.05 |
| E1 | TKW  | 7A | AX.89393659 | 1.30E+08 | 0.12 | -1.53  | 4.01 | 0.07 |
| E1 | TKW  | 7A | AX.89776623 | 1.67E+08 | 0.11 | -1.50  | 3.78 | 0.06 |
| E1 | TKW  | 7A | AX.89638213 | 1.45E+08 | 0.11 | -1.50  | 3.78 | 0.06 |
| E1 | TKW  | 7A | AX.89634936 | 1.39E+08 | 0.12 | -1.53  | 4.01 | 0.07 |
| E1 | TKW  | 7A | AX.89334270 | 1.43E+08 | 0.11 | -1.45  | 3.46 | 0.06 |



|    |     |    |             |          |      |       |      |      |
|----|-----|----|-------------|----------|------|-------|------|------|
| E1 | TKW | 7A | AX.89645587 | 2.33E+08 | 0.31 | -0.91 | 3.09 | 0.05 |
| E1 | TKW | 7A | AX.89581578 | 6.48E+08 | 0.22 | -1.17 | 3.97 | 0.07 |
| E1 | TKW | 7A | AX.89693291 | 1.45E+08 | 0.10 | -1.44 | 3.29 | 0.05 |
| E1 | TKW | 7A | AX.89703238 | 1.66E+08 | 0.11 | -1.38 | 3.15 | 0.05 |
| E1 | TKW | 7A | AX.89326890 | 1.35E+08 | 0.12 | -1.53 | 4.01 | 0.07 |
| E1 | TKW | 7A | AX.89482524 | 1.74E+08 | 0.11 | -1.34 | 3.10 | 0.05 |
| E1 | TKW | 7A | AX.89352556 | 1.92E+08 | 0.11 | -1.50 | 3.63 | 0.06 |
| E1 | TKW | 7A | AX.89710443 | 2.11E+08 | 0.10 | -1.43 | 3.25 | 0.05 |
| E1 | TKW | 7A | AX.89473713 | 1.44E+08 | 0.10 | -1.44 | 3.29 | 0.05 |
| E1 | TKW | 7A | AX.89534236 | 1.43E+08 | 0.11 | -1.50 | 3.78 | 0.06 |
| E1 | TKW | 7A | AX.89767754 | 1.55E+08 | 0.11 | -1.50 | 3.78 | 0.06 |
| E1 | TKW | 7A | AX.89695114 | 1.69E+08 | 0.11 | -1.50 | 3.78 | 0.06 |
| E1 | TKW | 7A | AX.89674985 | 1.38E+08 | 0.10 | -1.50 | 3.41 | 0.06 |
| E1 | TKW | 7A | AX.89680783 | 1.55E+08 | 0.10 | -1.43 | 3.25 | 0.05 |
| E1 | TKW | 7A | AX.89616620 | 2.44E+08 | 0.47 | -0.90 | 3.45 | 0.06 |
| E1 | TKW | 7A | AX.89546002 | 2.44E+08 | 0.47 | -0.97 | 3.93 | 0.07 |
| E1 | TKW | 7A | AX.89561828 | 1.39E+08 | 0.12 | -1.53 | 4.01 | 0.07 |
| E1 | TKW | 7A | AX.89531283 | 1.63E+08 | 0.11 | -1.50 | 3.78 | 0.06 |
| E1 | TKW | 7A | AX.89457427 | 1.75E+08 | 0.10 | -1.37 | 3.00 | 0.05 |
| E1 | TKW | 7A | AX.89340926 | 1.43E+08 | 0.11 | -1.50 | 3.78 | 0.06 |
| E1 | TKW | 7A | AX.89559450 | 1.63E+08 | 0.11 | -1.50 | 3.78 | 0.06 |
| E1 | TKW | 7A | AX.89492869 | 1.31E+08 | 0.12 | -1.53 | 4.01 | 0.07 |
| E1 | TKW | 7A | AX.89382385 | 9.24E+07 | 0.13 | -1.75 | 5.70 | 0.10 |
| E1 | TKW | 7A | AX.89476869 | 1.46E+08 | 0.11 | -1.38 | 3.15 | 0.05 |
| E1 | TKW | 7A | AX.89663706 | 2.11E+08 | 0.11 | -1.50 | 3.78 | 0.06 |
| E1 | TKW | 7A | AX.89673202 | 1.45E+08 | 0.10 | -1.44 | 3.29 | 0.05 |
| E1 | TKW | 7A | AX.89525405 | 1.71E+08 | 0.11 | -1.50 | 3.78 | 0.06 |
| E1 | TKW | 7A | AX.89453355 | 2.11E+08 | 0.11 | -1.38 | 3.15 | 0.05 |
| E1 | TKW | 7A | AX.89314646 | 1.69E+08 | 0.11 | -1.50 | 3.78 | 0.06 |
| E1 | TKW | 7A | AX.89466930 | 1.71E+08 | 0.11 | -1.50 | 3.78 | 0.06 |
| E1 | TKW | 7A | AX.89486831 | 1.28E+08 | 0.11 | -1.50 | 3.76 | 0.07 |
| E1 | TKW | 7A | AX.89626767 | 1.73E+08 | 0.12 | -1.38 | 3.38 | 0.06 |
| E1 | TKW | 7A | AX.89518080 | 1.62E+08 | 0.11 | -1.38 | 3.15 | 0.05 |
| E1 | TKW | 7A | AX.89532221 | 1.39E+08 | 0.12 | -1.53 | 4.01 | 0.07 |
| E1 | TKW | 7A | AX.89315572 | 1.43E+08 | 0.11 | -1.50 | 3.78 | 0.06 |
| E1 | TKW | 7A | AX.89766982 | 2.31E+08 | 0.31 | -0.93 | 3.17 | 0.05 |
| E1 | TKW | 7A | AX.89324155 | 9.25E+07 | 0.13 | -1.71 | 5.35 | 0.09 |
| E1 | TKW | 7A | AX.89609923 | 1.51E+08 | 0.10 | -1.43 | 3.25 | 0.05 |
| E1 | TKW | 7A | AX.89694134 | 1.54E+08 | 0.11 | -1.38 | 3.15 | 0.05 |
| E1 | TKW | 7A | AX.89612658 | 1.56E+08 | 0.11 | -1.32 | 3.02 | 0.05 |
| E1 | TKW | 7A | AX.89382266 | 1.60E+08 | 0.10 | -1.39 | 3.10 | 0.05 |
| E1 | TKW | 7A | AX.89750440 | 1.46E+08 | 0.11 | -1.50 | 3.78 | 0.06 |
| E1 | TKW | 7A | AX.89367696 | 2.31E+08 | 0.31 | -0.93 | 3.17 | 0.05 |
| E1 | TKW | 7A | AX.89589491 | 1.64E+08 | 0.11 | -1.38 | 3.15 | 0.05 |
| E1 | TKW | 7A | AX.89658888 | 1.59E+08 | 0.10 | -1.43 | 3.25 | 0.05 |
| E1 | TKW | 7A | AX.89503793 | 1.73E+08 | 0.11 | -1.50 | 3.63 | 0.06 |
| E1 | TKW | 7A | AX.89309860 | 1.62E+08 | 0.11 | -1.50 | 3.78 | 0.06 |
| E1 | TKW | 7A | AX.89489343 | 1.67E+08 | 0.11 | -1.57 | 3.94 | 0.07 |
| E1 | TKW | 7A | AX.89365732 | 1.42E+08 | 0.11 | -1.45 | 3.46 | 0.06 |
| E1 | TKW | 7A | AX.89442420 | 1.46E+08 | 0.11 | -1.38 | 3.15 | 0.05 |

|    |     |    |             |          |      |       |      |      |
|----|-----|----|-------------|----------|------|-------|------|------|
| E1 | TKW | 7A | AX.89559197 | 1.65E+08 | 0.11 | -1.38 | 3.15 | 0.05 |
| E1 | TKW | 7A | AX.89395679 | 1.54E+08 | 0.10 | -1.43 | 3.25 | 0.05 |
| E1 | TKW | 7A | AX.89364717 | 1.73E+08 | 0.10 | -1.45 | 3.31 | 0.05 |
| E1 | TKW | 7A | AX.89490664 | 1.39E+08 | 0.12 | -1.53 | 4.01 | 0.07 |
| E1 | TKW | 7A | AX.89490696 | 1.65E+08 | 0.11 | -1.50 | 3.78 | 0.06 |
| E1 | TKW | 7A | AX.89591960 | 1.69E+08 | 0.11 | -1.56 | 3.90 | 0.07 |
| E1 | TKW | 7A | AX.89664666 | 1.51E+08 | 0.11 | -1.38 | 3.15 | 0.05 |
| E1 | TKW | 7A | AX.86163578 | 1.65E+08 | 0.11 | -1.50 | 3.78 | 0.06 |
| E1 | TKW | 7A | AX.89738526 | 1.39E+08 | 0.11 | -1.46 | 3.48 | 0.06 |
| E1 | TKW | 7A | AX.89327721 | 1.63E+08 | 0.11 | -1.50 | 3.78 | 0.06 |
| E1 | TKW | 7A | AX.89423828 | 1.30E+08 | 0.11 | -1.46 | 3.48 | 0.06 |
| E1 | TKW | 7A | AX.89640632 | 1.43E+08 | 0.11 | -1.38 | 3.15 | 0.05 |
| E1 | TKW | 7A | AX.89715512 | 1.76E+08 | 0.10 | -1.37 | 3.00 | 0.05 |
| E1 | TKW | 7A | AX.89445359 | 9.30E+07 | 0.14 | -1.56 | 4.76 | 0.08 |
| E1 | TKW | 7A | AX.89445388 | 1.63E+08 | 0.10 | -1.50 | 3.41 | 0.06 |
| E1 | TKW | 7A | AX.89321190 | 9.68E+07 | 0.13 | -1.43 | 3.98 | 0.07 |
| E1 | TKW | 7A | AX.89524117 | 2.44E+08 | 0.47 | -0.90 | 3.45 | 0.06 |
| E1 | TKW | 7A | AX.89679566 | 1.36E+08 | 0.12 | -1.53 | 4.01 | 0.07 |
| E1 | TKW | 7A | AX.89641647 | 1.63E+08 | 0.11 | -1.38 | 3.15 | 0.05 |
| E1 | TKW | 7A | AX.89505905 | 1.36E+08 | 0.12 | -1.53 | 4.01 | 0.07 |
| E1 | TKW | 7A | AX.89570013 | 1.68E+08 | 0.11 | -1.50 | 3.78 | 0.06 |
| E1 | TKW | 7A | AX.89753271 | 1.39E+08 | 0.11 | -1.48 | 3.69 | 0.07 |
| E1 | TKW | 7A | AX.89577646 | 1.65E+08 | 0.11 | -1.50 | 3.78 | 0.06 |
| E1 | TKW | 7A | AX.89724963 | 1.64E+08 | 0.11 | -1.50 | 3.78 | 0.06 |
| E1 | TKW | 7A | AX.89748563 | 2.44E+08 | 0.47 | -0.97 | 3.93 | 0.07 |
| E1 | TKW | 7A | AX.89733212 | 1.39E+08 | 0.10 | -1.50 | 3.41 | 0.06 |
| E1 | TKW | 7A | AX.89312274 | 1.48E+08 | 0.10 | -1.44 | 3.29 | 0.05 |
| E1 | TKW | 7A | AX.89717446 | 2.11E+08 | 0.10 | -1.43 | 3.25 | 0.05 |
| E1 | TKW | 7A | AX.89659588 | 1.55E+08 | 0.11 | -1.38 | 3.15 | 0.05 |
| E1 | TKW | 7A | AX.89540791 | 2.11E+08 | 0.11 | -1.38 | 3.15 | 0.05 |
| E1 | TKW | 7A | AX.89578876 | 1.28E+08 | 0.09 | -1.47 | 3.16 | 0.05 |
| E1 | TKW | 7A | AX.89741905 | 1.69E+08 | 0.11 | -1.56 | 3.90 | 0.07 |
| E1 | TKW | 7A | AX.89384450 | 1.69E+08 | 0.11 | -1.56 | 3.90 | 0.07 |
| E1 | TKW | 7A | AX.89556024 | 9.24E+07 | 0.13 | -1.75 | 5.70 | 0.10 |
| E1 | TKW | 7A | AX.89627461 | 1.49E+08 | 0.11 | -1.50 | 3.78 | 0.06 |
| E1 | TKW | 7A | AX.89693975 | 1.63E+08 | 0.11 | -1.38 | 3.15 | 0.05 |
| E1 | TKW | 7A | AX.89377673 | 1.46E+08 | 0.10 | -1.44 | 3.29 | 0.05 |
| E1 | TKW | 7A | AX.89409921 | 2.12E+08 | 0.11 | -1.38 | 3.15 | 0.05 |
| E1 | TKW | 7A | AX.89479561 | 1.46E+08 | 0.10 | -1.44 | 3.29 | 0.05 |
| E1 | TKW | 7A | AX.89565819 | 1.67E+08 | 0.11 | -1.50 | 3.78 | 0.06 |
| E1 | TKW | 7A | AX.89598809 | 1.60E+08 | 0.11 | -1.50 | 3.78 | 0.06 |
| E1 | TKW | 7A | AX.89456953 | 9.31E+07 | 0.14 | -1.56 | 4.76 | 0.08 |
| E1 | TKW | 7A | AX.89696867 | 1.59E+08 | 0.09 | -1.51 | 3.17 | 0.05 |
| E1 | TKW | 7A | AX.89713138 | 1.63E+08 | 0.11 | -1.50 | 3.78 | 0.06 |
| E1 | TKW | 7A | AX.89513912 | 1.73E+08 | 0.11 | -1.50 | 3.63 | 0.06 |
| E1 | TKW | 7A | AX.89443261 | 1.39E+08 | 0.11 | -1.54 | 3.80 | 0.07 |
| E1 | TKW | 7A | AX.89591873 | 9.29E+07 | 0.13 | -1.75 | 5.70 | 0.10 |
| E1 | TKW | 7A | AX.89737852 | 1.43E+08 | 0.10 | -1.43 | 3.25 | 0.05 |
| E1 | TKW | 7A | AX.89440892 | 1.74E+08 | 0.11 | -1.34 | 3.10 | 0.05 |
| E1 | TKW | 7A | AX.89341483 | 1.64E+08 | 0.11 | -1.50 | 3.78 | 0.06 |

|    |     |    |             |          |      |       |      |      |
|----|-----|----|-------------|----------|------|-------|------|------|
| E1 | TKW | 7A | AX.89774061 | 1.43E+08 | 0.11 | -1.50 | 3.78 | 0.06 |
| E1 | TKW | 7A | AX.89498031 | 2.12E+08 | 0.10 | -1.43 | 3.25 | 0.05 |
| E1 | TKW | 7A | AX.89314363 | 2.11E+08 | 0.11 | -1.50 | 3.78 | 0.06 |
| E1 | TKW | 7A | AX.89762809 | 6.47E+08 | 0.24 | -1.02 | 3.31 | 0.06 |
| E1 | TKW | 7A | AX.89522800 | 2.11E+08 | 0.10 | -1.43 | 3.25 | 0.05 |
| E1 | TKW | 7A | AX.89738666 | 6.48E+08 | 0.22 | -1.17 | 3.97 | 0.07 |
| E1 | TKW | 7A | AX.89570761 | 1.62E+08 | 0.10 | -1.44 | 3.27 | 0.05 |
| E1 | TKW | 7A | AX.89528414 | 1.30E+08 | 0.10 | -1.41 | 3.16 | 0.06 |
| E1 | TKW | 7A | AX.89349894 | 2.32E+08 | 0.31 | -0.93 | 3.17 | 0.05 |
| E1 | TKW | 7A | AX.89681143 | 1.30E+08 | 0.11 | -1.46 | 3.48 | 0.06 |
| E1 | TKW | 7A | AX.89693276 | 2.11E+08 | 0.11 | -1.38 | 3.15 | 0.05 |
| E1 | TKW | 7A | AX.89429742 | 1.55E+08 | 0.11 | -1.38 | 3.15 | 0.05 |
| E1 | TKW | 7A | AX.89320738 | 9.76E+07 | 0.08 | -1.65 | 3.57 | 0.06 |
| E1 | TKW | 7A | AX.89609374 | 1.45E+08 | 0.11 | -1.38 | 3.15 | 0.05 |
| E1 | TKW | 7A | AX.89594045 | 1.29E+08 | 0.10 | -1.50 | 3.41 | 0.06 |
| E1 | TKW | 7A | AX.89445885 | 2.11E+08 | 0.09 | -1.45 | 3.09 | 0.05 |
| E1 | TKW | 7A | AX.89691262 | 1.76E+08 | 0.10 | -1.37 | 3.00 | 0.05 |
| E1 | TKW | 7A | AX.89382322 | 1.49E+08 | 0.11 | -1.38 | 3.15 | 0.05 |
| E1 | TKW | 7A | AX.89618041 | 1.30E+08 | 0.11 | -1.48 | 3.69 | 0.07 |
| E1 | TKW | 7A | AX.89664943 | 1.45E+08 | 0.11 | -1.45 | 3.46 | 0.06 |
| E1 | TKW | 7A | AX.89746157 | 1.71E+08 | 0.11 | -1.50 | 3.78 | 0.06 |
| E1 | TKW | 7A | AX.89391234 | 1.48E+08 | 0.11 | -1.57 | 3.94 | 0.07 |
| E1 | TKW | 7A | AX.89727857 | 1.63E+08 | 0.11 | -1.38 | 3.15 | 0.05 |
| E1 | TKW | 7A | AX.89423656 | 1.48E+08 | 0.10 | -1.44 | 3.29 | 0.05 |
| E1 | TKW | 7A | AX.89733640 | 1.69E+08 | 0.11 | -1.50 | 3.78 | 0.06 |
| E1 | TKW | 7A | AX.89564148 | 1.56E+08 | 0.10 | -1.43 | 3.25 | 0.05 |
| E1 | TKW | 7A | AX.89766912 | 1.69E+08 | 0.10 | -1.51 | 3.57 | 0.06 |
| E1 | TKW | 7A | AX.89596449 | 9.22E+07 | 0.13 | -1.75 | 5.70 | 0.10 |
| E1 | TKW | 7A | AX.89549174 | 1.74E+08 | 0.10 | -1.37 | 3.00 | 0.05 |
| E1 | TKW | 7A | AX.89433904 | 1.32E+08 | 0.11 | -1.41 | 3.37 | 0.06 |
| E1 | TKW | 7A | AX.89645017 | 1.30E+08 | 0.11 | -1.41 | 3.37 | 0.06 |
| E1 | TKW | 7A | AX.89344375 | 2.99E+08 | 0.29 | -0.94 | 3.15 | 0.06 |
| E1 | TKW | 7A | AX.89616317 | 9.96E+07 | 0.09 | -1.57 | 3.39 | 0.06 |
| E1 | TKW | 7A | AX.89645691 | 1.62E+08 | 0.10 | -1.43 | 3.25 | 0.05 |
| E1 | TKW | 7A | AX.89482233 | 1.47E+08 | 0.10 | -1.44 | 3.29 | 0.05 |
| E1 | TKW | 7A | AX.89371886 | 1.69E+08 | 0.11 | -1.50 | 3.78 | 0.06 |
| E1 | TKW | 7A | AX.89679184 | 1.71E+08 | 0.11 | -1.50 | 3.78 | 0.06 |
| E1 | TKW | 7A | AX.89464243 | 1.63E+08 | 0.11 | -1.57 | 3.94 | 0.07 |
| E1 | TKW | 7A | AX.89472900 | 1.76E+08 | 0.11 | -1.50 | 3.63 | 0.06 |
| E1 | TKW | 7A | AX.89558892 | 1.39E+08 | 0.11 | -1.48 | 3.69 | 0.07 |
| E1 | TKW | 7A | AX.89582596 | 1.43E+08 | 0.11 | -1.50 | 3.78 | 0.06 |
| E1 | TKW | 7A | AX.89607924 | 1.71E+08 | 0.11 | -1.45 | 3.46 | 0.06 |
| E1 | TKW | 7A | AX.89529525 | 1.47E+08 | 0.11 | -1.50 | 3.78 | 0.06 |
| E1 | TKW | 7A | AX.89348695 | 1.33E+08 | 0.11 | -1.46 | 3.48 | 0.06 |
| E1 | TKW | 7A | AX.89514329 | 1.46E+08 | 0.10 | -1.44 | 3.29 | 0.05 |
| E1 | TKW | 7A | AX.89529919 | 1.36E+08 | 0.12 | -1.53 | 4.01 | 0.07 |
| E1 | TKW | 7A | AX.89567946 | 2.12E+08 | 0.11 | -1.50 | 3.78 | 0.06 |
| E1 | TKW | 7A | AX.89404679 | 1.45E+08 | 0.11 | -1.38 | 3.15 | 0.05 |
| E1 | TKW | 7A | AX.89480444 | 1.44E+08 | 0.11 | -1.50 | 3.78 | 0.06 |
| E1 | TKW | 7A | AX.89373311 | 1.39E+08 | 0.11 | -1.48 | 3.69 | 0.07 |

|    |     |    |             |          |      |       |      |      |
|----|-----|----|-------------|----------|------|-------|------|------|
| E1 | TKW | 7A | AX.89320137 | 1.67E+08 | 0.10 | -1.63 | 4.07 | 0.07 |
| E1 | TKW | 7A | AX.89560870 | 2.12E+08 | 0.10 | -1.43 | 3.25 | 0.05 |
| E1 | TKW | 7A | AX.89584745 | 1.46E+08 | 0.11 | -1.50 | 3.78 | 0.06 |
| E1 | TKW | 7A | AX.89657752 | 1.51E+08 | 0.10 | -1.43 | 3.25 | 0.05 |
| E1 | TKW | 7A | AX.89414061 | 2.44E+08 | 0.47 | -0.97 | 3.93 | 0.07 |
| E1 | TKW | 7A | AX.89755312 | 1.69E+08 | 0.11 | -1.50 | 3.78 | 0.06 |
| E1 | TKW | 7A | AX.89742866 | 9.31E+07 | 0.07 | -1.63 | 3.01 | 0.05 |
| E1 | TKW | 7A | AX.89524570 | 1.69E+08 | 0.11 | -1.56 | 3.90 | 0.07 |
| E1 | TKW | 7A | AX.89625416 | 1.57E+08 | 0.11 | -1.50 | 3.78 | 0.06 |
| E1 | TKW | 7A | AX.89773714 | 1.63E+08 | 0.11 | -1.50 | 3.78 | 0.06 |
| E1 | TKW | 7A | AX.89748815 | 1.60E+08 | 0.11 | -1.45 | 3.46 | 0.06 |
| E1 | TKW | 7A | AX.89563993 | 1.01E+08 | 0.09 | -1.57 | 3.39 | 0.06 |
| E1 | TKW | 7A | AX.89676904 | 1.39E+08 | 0.11 | -1.41 | 3.37 | 0.06 |
| E1 | TKW | 7A | AX.89385468 | 1.58E+08 | 0.11 | -1.50 | 3.78 | 0.06 |
| E1 | TKW | 7A | AX.89770675 | 1.57E+08 | 0.11 | -1.50 | 3.78 | 0.06 |
| E1 | TKW | 7A | AX.89669837 | 9.19E+07 | 0.08 | -1.99 | 4.71 | 0.08 |
| E1 | TKW | 7A | AX.89471729 | 1.60E+08 | 0.11 | -1.45 | 3.46 | 0.06 |
| E1 | TKW | 7A | AX.89760158 | 1.48E+08 | 0.11 | -1.45 | 3.46 | 0.06 |
| E1 | TKW | 7A | AX.89566135 | 1.40E+08 | 0.10 | -1.43 | 3.25 | 0.05 |
| E1 | TKW | 7A | AX.89706709 | 1.73E+08 | 0.10 | -1.37 | 3.00 | 0.05 |
| E1 | TKW | 7A | AX.89369373 | 1.36E+08 | 0.09 | -1.45 | 3.09 | 0.05 |
| E1 | TKW | 7A | AX.89761067 | 1.53E+08 | 0.11 | -1.38 | 3.15 | 0.05 |
| E1 | TKW | 7A | AX.89747753 | 1.73E+08 | 0.10 | -1.37 | 3.00 | 0.05 |
| E1 | TKW | 7A | AX.89770557 | 1.02E+08 | 0.09 | -1.57 | 3.39 | 0.06 |
| E1 | TKW | 7A | AX.89623108 | 1.47E+08 | 0.10 | -1.44 | 3.29 | 0.05 |
| E1 | TKW | 7A | AX.89413022 | 1.66E+08 | 0.11 | -1.50 | 3.78 | 0.06 |
| E1 | TKW | 7A | AX.89552086 | 1.48E+08 | 0.11 | -1.38 | 3.15 | 0.05 |
| E1 | TKW | 7A | AX.89563099 | 1.63E+08 | 0.11 | -1.50 | 3.78 | 0.06 |
| E1 | TKW | 7A | AX.89311866 | 1.50E+08 | 0.10 | -1.43 | 3.25 | 0.05 |
| E1 | TKW | 7A | AX.89670257 | 1.65E+08 | 0.11 | -1.50 | 3.78 | 0.06 |
| E1 | TKW | 7A | AX.89595385 | 2.11E+08 | 0.11 | -1.38 | 3.15 | 0.05 |
| E1 | TKW | 7A | AX.89754191 | 1.37E+08 | 0.10 | -1.63 | 4.07 | 0.07 |
| E1 | TKW | 7A | AX.89588065 | 1.46E+08 | 0.11 | -1.38 | 3.15 | 0.05 |
| E1 | TKW | 7A | AX.89609800 | 1.74E+08 | 0.11 | -1.50 | 3.63 | 0.06 |
| E1 | TKW | 7A | AX.89594145 | 2.44E+08 | 0.47 | -0.90 | 3.45 | 0.06 |
| E1 | TKW | 7A | AX.89492663 | 1.32E+08 | 0.11 | -1.46 | 3.48 | 0.06 |
| E1 | TKW | 7A | AX.89359323 | 5.69E+08 | 0.25 | 1.01  | 3.32 | 0.06 |
| E1 | TKW | 7A | AX.89569864 | 9.34E+07 | 0.07 | -1.94 | 4.06 | 0.07 |
| E1 | TKW | 7A | AX.89453447 | 2.12E+08 | 0.11 | -1.38 | 3.15 | 0.05 |
| E1 | TKW | 7A | AX.89692416 | 2.11E+08 | 0.10 | -1.50 | 3.41 | 0.06 |
| E1 | TKW | 7A | AX.89740580 | 1.66E+08 | 0.11 | -1.38 | 3.15 | 0.05 |
| E1 | TKW | 7A | AX.89725169 | 1.47E+08 | 0.11 | -1.50 | 3.78 | 0.06 |
| E1 | TKW | 7A | AX.89444163 | 2.32E+08 | 0.31 | -0.93 | 3.17 | 0.05 |
| E1 | TKW | 7A | AX.89549866 | 1.39E+08 | 0.12 | -1.53 | 4.01 | 0.07 |
| E1 | TKW | 7A | AX.89408775 | 2.32E+08 | 0.31 | -0.93 | 3.17 | 0.05 |
| E1 | TKW | 7A | AX.89749279 | 1.30E+08 | 0.12 | -1.53 | 4.01 | 0.07 |
| E1 | TKW | 7A | AX.89693849 | 1.74E+08 | 0.11 | -1.50 | 3.63 | 0.06 |
| E1 | TKW | 7A | AX.89482666 | 1.01E+08 | 0.09 | -1.57 | 3.39 | 0.06 |
| E1 | TKW | 7A | AX.89749770 | 1.28E+08 | 0.08 | -1.60 | 3.37 | 0.06 |
| E1 | TKW | 7A | AX.89697152 | 1.38E+08 | 0.09 | -1.45 | 3.09 | 0.05 |

|    |      |    |             |          |      |        |      |      |
|----|------|----|-------------|----------|------|--------|------|------|
| E1 | TKW  | 7A | AX.89462609 | 1.47E+08 | 0.11 | -1.38  | 3.15 | 0.05 |
| E1 | TKW  | 7A | AX.89757664 | 1.45E+08 | 0.11 | -1.50  | 3.78 | 0.06 |
| E1 | TKW  | 7A | AX.89512143 | 1.28E+08 | 0.09 | -1.47  | 3.16 | 0.05 |
| E1 | TKW  | 7A | AX.89512492 | 1.51E+08 | 0.34 | -0.90  | 3.14 | 0.05 |
| E1 | TKW  | 7A | AX.89631557 | 9.19E+07 | 0.10 | -1.55  | 3.74 | 0.06 |
| E1 | TKW  | 7A | AX.89418006 | 1.32E+08 | 0.11 | -1.35  | 3.06 | 0.05 |
| E1 | TKW  | 7A | AX.89513304 | 1.64E+08 | 0.11 | -1.38  | 3.15 | 0.05 |
| E1 | TKW  | 7A | AX.89746708 | 1.29E+08 | 0.10 | -1.50  | 3.41 | 0.06 |
| E1 | TKW  | 7A | AX.89687920 | 1.56E+08 | 0.11 | -1.38  | 3.15 | 0.05 |
| E1 | TKW  | 7A | AX.89523870 | 9.26E+07 | 0.13 | -1.75  | 5.70 | 0.10 |
| E1 | TKW  | 7A | AX.89476138 | 1.67E+08 | 0.11 | -1.50  | 3.78 | 0.06 |
| E1 | TKW  | 7A | AX.89551736 | 1.63E+08 | 0.11 | -1.50  | 3.78 | 0.06 |
| E1 | TKW  | 7A | AX.89722293 | 1.75E+08 | 0.10 | -1.37  | 3.00 | 0.05 |
| E1 | TKW  | 7A | AX.89559997 | 2.27E+08 | 0.30 | -0.91  | 3.06 | 0.05 |
| E1 | TKW  | 7A | AX.89618132 | 1.72E+08 | 0.10 | -1.45  | 3.31 | 0.05 |
| E1 | TKW  | 7A | AX.89380613 | 1.45E+08 | 0.10 | -1.44  | 3.29 | 0.05 |
| E1 | TKW  | 7A | AX.89729956 | 1.51E+08 | 0.11 | -1.38  | 3.15 | 0.05 |
| E1 | TKW  | 7A | AX.89683256 | 1.63E+08 | 0.11 | -1.50  | 3.78 | 0.06 |
| E1 | TKW  | 7A | AX.89474753 | 1.43E+08 | 0.11 | -1.50  | 3.78 | 0.06 |
| E1 | TKW  | 7A | AX.89373595 | 1.53E+08 | 0.10 | -1.43  | 3.25 | 0.05 |
| E1 | TKW  | 7A | AX.89765922 | 9.31E+07 | 0.15 | -1.55  | 4.92 | 0.09 |
| E1 | TKW  | 7A | AX.89368890 | 1.30E+08 | 0.11 | -1.46  | 3.48 | 0.06 |
| E1 | GPM2 | 7A | AX.89486552 | 2.07E+08 | 0.31 | 665.20 | 3.33 | 0.06 |
| E1 | TKW  | 7A | AX.89717578 | 2.11E+08 | 0.10 | -1.43  | 3.25 | 0.05 |
| E1 | TKW  | 7A | AX.89447882 | 1.76E+08 | 0.11 | -1.50  | 3.63 | 0.06 |
| E1 | TKW  | 7A | AX.89686118 | 1.30E+08 | 0.11 | -1.46  | 3.48 | 0.06 |
| E1 | TKW  | 7A | AX.89495797 | 6.72E+08 | 0.17 | -1.15  | 3.28 | 0.06 |
| E1 | TKW  | 7A | AX.89461207 | 1.47E+08 | 0.10 | -1.44  | 3.29 | 0.05 |
| E1 | TKW  | 7A | AX.89631561 | 1.47E+08 | 0.11 | -1.40  | 3.24 | 0.05 |
| E1 | TKW  | 7A | AX.89339347 | 1.74E+08 | 0.11 | -1.39  | 3.20 | 0.05 |
| E1 | TKW  | 7A | AX.89542429 | 9.76E+07 | 0.09 | -1.57  | 3.39 | 0.06 |
| E1 | TKW  | 7A | AX.89652732 | 1.45E+08 | 0.10 | -1.44  | 3.29 | 0.05 |
| E1 | TKW  | 7A | AX.89657479 | 1.39E+08 | 0.11 | -1.49  | 3.59 | 0.06 |
| E1 | TKW  | 7A | AX.89369267 | 1.51E+08 | 0.11 | -1.38  | 3.15 | 0.05 |
| E1 | TKW  | 7A | AX.89728582 | 1.70E+08 | 0.11 | -1.50  | 3.78 | 0.06 |
| E1 | TKW  | 7A | AX.89438086 | 9.27E+07 | 0.13 | -1.75  | 5.70 | 0.10 |
| E1 | TKW  | 7A | AX.89775656 | 1.51E+08 | 0.10 | -1.43  | 3.25 | 0.05 |
| E1 | TKW  | 7A | AX.89455663 | 1.68E+08 | 0.11 | -1.45  | 3.46 | 0.06 |
| E1 | TKW  | 7A | AX.89591152 | 2.25E+08 | 0.29 | -0.98  | 3.40 | 0.06 |
| E1 | TKW  | 7A | AX.89327185 | 1.74E+08 | 0.10 | -1.55  | 3.75 | 0.06 |
| E1 | TKW  | 7A | AX.89325179 | 1.47E+08 | 0.11 | -1.38  | 3.15 | 0.05 |
| E1 | TKW  | 7A | AX.89576342 | 1.00E+08 | 0.09 | -1.57  | 3.39 | 0.06 |
| E1 | TKW  | 7A | AX.89554314 | 9.65E+07 | 0.12 | -1.68  | 4.90 | 0.09 |
| E1 | TKW  | 7A | AX.89631101 | 1.28E+08 | 0.09 | -1.47  | 3.16 | 0.05 |
| E1 | TKW  | 7A | AX.89412894 | 1.64E+08 | 0.11 | -1.50  | 3.78 | 0.06 |
| E1 | TKW  | 7A | AX.89760693 | 1.76E+08 | 0.10 | -1.37  | 3.00 | 0.05 |
| E1 | TKW  | 7A | AX.89771979 | 1.38E+08 | 0.12 | -1.53  | 4.01 | 0.07 |
| E1 | TKW  | 7A | AX.89708817 | 1.64E+08 | 0.11 | -1.50  | 3.78 | 0.06 |
| E1 | TKW  | 7A | AX.89393704 | 1.36E+08 | 0.12 | -1.53  | 4.01 | 0.07 |
| E1 | TKW  | 7A | AX.89694506 | 1.43E+08 | 0.11 | -1.50  | 3.78 | 0.06 |

|    |      |    |             |          |      |        |      |      |
|----|------|----|-------------|----------|------|--------|------|------|
| E1 | TKW  | 7A | AX.89558631 | 1.49E+08 | 0.11 | -1.45  | 3.46 | 0.06 |
| E1 | TKW  | 7A | AX.89512425 | 1.50E+08 | 0.10 | -1.44  | 3.16 | 0.05 |
| E1 | TKW  | 7A | AX.89317218 | 1.49E+08 | 0.11 | -1.45  | 3.46 | 0.06 |
| E1 | TKW  | 7A | AX.89607576 | 2.11E+08 | 0.11 | -1.38  | 3.15 | 0.05 |
| E1 | TKW  | 7A | AX.89733424 | 2.02E+08 | 0.10 | -1.45  | 3.31 | 0.05 |
| E1 | TKW  | 7A | AX.89516376 | 1.55E+08 | 0.10 | -1.43  | 3.25 | 0.05 |
| E1 | TKW  | 7A | AX.89722286 | 1.72E+08 | 0.11 | -1.50  | 3.78 | 0.06 |
| E1 | TKW  | 7A | AX.89666934 | 1.48E+08 | 0.10 | -1.44  | 3.29 | 0.05 |
| E1 | TKW  | 7A | AX.89666498 | 1.45E+08 | 0.11 | -1.57  | 3.94 | 0.07 |
| E1 | TKW  | 7A | AX.89626073 | 1.49E+08 | 0.11 | -1.50  | 3.78 | 0.06 |
| E1 | TKW  | 7A | AX.89404941 | 1.76E+08 | 0.11 | -1.50  | 3.63 | 0.06 |
| E1 | TKW  | 7A | AX.89576921 | 1.72E+08 | 0.10 | -1.45  | 3.31 | 0.05 |
| E1 | TKW  | 7A | AX.89537853 | 1.29E+08 | 0.12 | -1.53  | 4.01 | 0.07 |
| E1 | TKW  | 7A | AX.89674638 | 1.67E+08 | 0.11 | -1.50  | 3.78 | 0.06 |
| E1 | TKW  | 7A | AX.89343150 | 1.71E+08 | 0.11 | -1.50  | 3.78 | 0.06 |
| E1 | TKW  | 7A | AX.89614349 | 6.72E+08 | 0.20 | -1.25  | 4.25 | 0.07 |
| E2 | SPM2 | 7A | AX.89338075 | 6.28E+08 | 0.25 | 14.23  | 3.33 | 0.06 |
| E2 | SPM2 | 7A | AX.89689513 | 6.40E+08 | 0.13 | 17.18  | 3.01 | 0.05 |
| E2 | SPM2 | 7A | AX.89497690 | 8.59E+07 | 0.21 | 14.93  | 3.32 | 0.06 |
| E2 | SPM2 | 7A | AX.89536189 | 8.52E+07 | 0.47 | -11.71 | 3.07 | 0.05 |
| E2 | SPM2 | 7A | AX.89441511 | 8.56E+07 | 0.16 | 17.06  | 3.42 | 0.06 |
| E2 | SPM2 | 7A | AX.89533869 | 9.03E+07 | 0.10 | 26.41  | 5.31 | 0.10 |
| E2 | SPM2 | 7A | AX.89547147 | 8.52E+07 | 0.47 | -12.49 | 3.43 | 0.06 |
| E2 | SPM2 | 7A | AX.89389967 | 8.52E+07 | 0.47 | -11.71 | 3.07 | 0.05 |
| E2 | SPM2 | 7A | AX.89389117 | 8.53E+07 | 0.48 | -12.62 | 3.50 | 0.06 |
| E2 | SPM2 | 7A | AX.89347005 | 8.52E+07 | 0.47 | -11.71 | 3.07 | 0.05 |
| E2 | SPM2 | 7A | AX.89340453 | 8.59E+07 | 0.22 | 15.19  | 3.47 | 0.06 |
| E2 | SPM2 | 7A | AX.89562955 | 6.40E+08 | 0.17 | 17.34  | 3.73 | 0.06 |
| E2 | SPM2 | 7A | AX.89366635 | 9.03E+07 | 0.10 | 26.41  | 5.31 | 0.10 |
| E2 | SPM2 | 7A | AX.89328795 | 9.05E+07 | 0.05 | 28.43  | 3.45 | 0.06 |
| E2 | SPM2 | 7A | AX.89344728 | 8.38E+07 | 0.48 | -12.14 | 3.27 | 0.06 |
| E2 | SPM2 | 7A | AX.89519524 | 9.14E+07 | 0.07 | 25.22  | 3.80 | 0.07 |
| E2 | GY   | 7A | AX.89655850 | 4.77E+07 | 0.07 | -4.63  | 4.29 | 0.06 |
| E2 | SPM2 | 7A | AX.89399929 | 8.56E+07 | 0.16 | 16.34  | 3.18 | 0.05 |
| E2 | SPM2 | 7A | AX.89472739 | 6.40E+08 | 0.13 | 17.18  | 3.01 | 0.05 |
| E2 | SPM2 | 7A | AX.89310521 | 8.52E+07 | 0.47 | -11.71 | 3.07 | 0.05 |
| E2 | SPM2 | 7A | AX.89592523 | 2.23E+08 | 0.20 | 15.88  | 3.59 | 0.06 |
| E2 | SPM2 | 7A | AX.89690492 | 8.38E+07 | 0.47 | -11.76 | 3.09 | 0.06 |
| E2 | SPM2 | 7A | AX.89437917 | 8.53E+07 | 0.48 | -12.62 | 3.50 | 0.06 |
| E2 | SPM2 | 7A | AX.89717792 | 6.27E+08 | 0.20 | 14.71  | 3.10 | 0.05 |
| E2 | SPM2 | 7A | AX.89362135 | 8.53E+07 | 0.48 | -12.62 | 3.50 | 0.06 |
| E2 | SPM2 | 7A | AX.89446007 | 6.28E+08 | 0.20 | 14.98  | 3.25 | 0.06 |
| E2 | SPM2 | 7A | AX.89443663 | 9.19E+07 | 0.12 | 19.50  | 3.44 | 0.06 |
| E2 | SPM2 | 7A | AX.89322222 | 4.75E+07 | 0.16 | 17.16  | 3.52 | 0.06 |
| E2 | SPM2 | 7A | AX.89422899 | 6.28E+08 | 0.25 | 14.23  | 3.33 | 0.06 |
| E2 | SPM2 | 7A | AX.89360916 | 7.32E+08 | 0.10 | 21.32  | 3.52 | 0.06 |
| E2 | SPM2 | 7A | AX.89450088 | 1.49E+08 | 0.20 | 15.54  | 3.36 | 0.06 |
| E2 | SPM2 | 7A | AX.89613288 | 8.56E+07 | 0.16 | 16.58  | 3.32 | 0.06 |
| E2 | SPM2 | 7A | AX.89382961 | 8.38E+07 | 0.47 | -11.76 | 3.09 | 0.06 |
| E2 | SPM2 | 7A | AX.89454239 | 6.28E+08 | 0.22 | 14.78  | 3.31 | 0.06 |

|    |      |    |             |          |      |        |      |      |
|----|------|----|-------------|----------|------|--------|------|------|
| E2 | SPM2 | 7A | AX.89728059 | 8.53E+07 | 0.48 | -12.62 | 3.50 | 0.06 |
| E2 | SPM2 | 7A | AX.89495137 | 6.29E+08 | 0.25 | 14.23  | 3.33 | 0.06 |
| E2 | SPM2 | 7A | AX.89533985 | 8.52E+07 | 0.47 | -11.71 | 3.07 | 0.05 |
| E2 | SPM2 | 7A | AX.89331101 | 7.36E+08 | 0.08 | 24.79  | 3.87 | 0.07 |
| E2 | SPM2 | 7A | AX.89359463 | 8.52E+07 | 0.47 | -11.61 | 3.03 | 0.05 |
| E2 | SPM2 | 7A | AX.89722397 | 6.40E+08 | 0.13 | 17.18  | 3.01 | 0.05 |
| E2 | SPM2 | 7A | AX.89373046 | 6.14E+08 | 0.08 | 22.39  | 3.39 | 0.06 |
| E2 | SPM2 | 7A | AX.89607906 | 8.38E+07 | 0.47 | -11.76 | 3.09 | 0.06 |
| E2 | SPM2 | 7A | AX.89589758 | 6.27E+08 | 0.20 | 14.71  | 3.10 | 0.05 |
| E2 | SPM2 | 7A | AX.89610935 | 8.53E+07 | 0.48 | -12.62 | 3.50 | 0.06 |
| E2 | SPM2 | 7A | AX.89496810 | 8.52E+07 | 0.47 | -11.71 | 3.07 | 0.05 |
| E2 | SPM2 | 7A | AX.89414275 | 8.99E+07 | 0.07 | 27.07  | 3.86 | 0.07 |
| E2 | SPM2 | 7A | AX.89561047 | 8.52E+07 | 0.47 | -11.71 | 3.07 | 0.05 |
| E2 | SPM2 | 7A | AX.89691294 | 8.53E+07 | 0.48 | -12.62 | 3.50 | 0.06 |
| E2 | SPM2 | 7A | AX.89694768 | 9.19E+07 | 0.09 | 20.36  | 3.01 | 0.05 |
| E2 | SPM2 | 7A | AX.89549336 | 8.38E+07 | 0.47 | -11.76 | 3.09 | 0.06 |
| E2 | GY   | 7A | AX.89651931 | 6.87E+06 | 0.36 | -1.96  | 3.02 | 0.06 |
| E2 | GY   | 7A | AX.89651931 | 6.87E+06 | 0.36 | -1.96  | 3.02 | 0.06 |
| E2 | SPM2 | 7A | AX.89712434 | 9.14E+07 | 0.07 | 25.22  | 3.80 | 0.07 |
| E2 | SPM2 | 7A | AX.89560537 | 8.49E+07 | 0.45 | 12.27  | 3.30 | 0.06 |
| E2 | SPM2 | 7A | AX.89748541 | 8.38E+07 | 0.47 | -11.76 | 3.09 | 0.06 |
| E2 | SPM2 | 7A | AX.89539906 | 8.38E+07 | 0.49 | -12.18 | 3.29 | 0.06 |
| E2 | SPM2 | 7A | AX.89357222 | 9.03E+07 | 0.10 | 26.41  | 5.31 | 0.10 |
| E2 | GY   | 7A | AX.89474325 | 4.76E+07 | 0.05 | -4.53  | 3.40 | 0.05 |
| E2 | SPM2 | 7A | AX.89701961 | 8.38E+07 | 0.47 | -11.76 | 3.09 | 0.06 |
| E2 | SPM2 | 7A | AX.89757161 | 6.41E+08 | 0.12 | 17.90  | 3.06 | 0.05 |
| E2 | SPM2 | 7A | AX.89626055 | 6.40E+08 | 0.13 | 17.18  | 3.01 | 0.05 |
| E2 | SPM2 | 7A | AX.89365387 | 8.53E+07 | 0.48 | -12.62 | 3.50 | 0.06 |
| E2 | SPM2 | 7A | AX.89773543 | 8.98E+07 | 0.07 | 25.10  | 3.77 | 0.06 |
| E2 | SPM2 | 7A | AX.89575300 | 8.56E+07 | 0.16 | 16.34  | 3.18 | 0.05 |
| E2 | TKW  | 7A | AX.89645283 | 6.48E+08 | 0.23 | -1.32  | 4.20 | 0.07 |
| E2 | TKW  | 7A | AX.89711943 | 2.44E+08 | 0.47 | -0.93  | 3.11 | 0.05 |
| E2 | SPM2 | 7A | AX.89659114 | 8.52E+07 | 0.47 | -11.84 | 3.12 | 0.05 |
| E2 | SPM2 | 7A | AX.89427331 | 8.53E+07 | 0.48 | -12.62 | 3.50 | 0.06 |
| E2 | SPM2 | 7A | AX.89438003 | 8.59E+07 | 0.21 | 14.93  | 3.32 | 0.06 |
| E2 | SPM2 | 7A | AX.89399345 | 8.59E+07 | 0.21 | 14.93  | 3.32 | 0.06 |
| E2 | SPM2 | 7A | AX.89565261 | 8.56E+07 | 0.16 | 16.34  | 3.18 | 0.05 |
| E2 | SPM2 | 7A | AX.89698264 | 8.52E+07 | 0.47 | -11.71 | 3.07 | 0.05 |
| E2 | SPM2 | 7A | AX.89635468 | 8.54E+07 | 0.48 | -12.62 | 3.50 | 0.06 |
| E2 | SPM2 | 7A | AX.89433942 | 8.56E+07 | 0.16 | 16.58  | 3.32 | 0.06 |
| E2 | SPM2 | 7A | AX.89740653 | 6.29E+08 | 0.22 | 15.90  | 3.80 | 0.07 |
| E2 | SPM2 | 7A | AX.89416745 | 8.53E+07 | 0.48 | -12.62 | 3.50 | 0.06 |
| E2 | SPM2 | 7A | AX.89322489 | 8.52E+07 | 0.47 | -11.71 | 3.07 | 0.05 |
| E2 | SPM2 | 7A | AX.89536861 | 6.28E+08 | 0.25 | 14.23  | 3.33 | 0.06 |
| E2 | SPM2 | 7A | AX.89426478 | 8.59E+07 | 0.21 | 14.93  | 3.32 | 0.06 |
| E2 | SPM2 | 7A | AX.89766471 | 8.53E+07 | 0.48 | -12.62 | 3.50 | 0.06 |
| E2 | SPM2 | 7A | AX.89676739 | 8.53E+07 | 0.48 | -12.62 | 3.50 | 0.06 |
| E2 | SPM2 | 7A | AX.89522144 | 6.40E+08 | 0.17 | 17.34  | 3.73 | 0.06 |
| E2 | SPM2 | 7A | AX.89569864 | 9.34E+07 | 0.07 | 22.74  | 3.02 | 0.05 |
| E2 | SPM2 | 7A | AX.89711930 | 6.27E+08 | 0.20 | 14.72  | 3.11 | 0.05 |

|    |      |    |             |          |      |        |      |      |
|----|------|----|-------------|----------|------|--------|------|------|
| E2 | SPM2 | 7A | AX.89373433 | 8.59E+07 | 0.21 | 14.93  | 3.32 | 0.06 |
| E2 | SPM2 | 7A | AX.89507244 | 8.49E+07 | 0.46 | 11.99  | 3.18 | 0.06 |
| E2 | SPM2 | 7A | AX.89651386 | 6.29E+08 | 0.24 | 14.24  | 3.30 | 0.06 |
| E2 | SPM2 | 7A | AX.89358546 | 8.51E+07 | 0.47 | -11.71 | 3.07 | 0.05 |
| E2 | SPM2 | 7A | AX.89370059 | 6.27E+08 | 0.20 | 14.66  | 3.13 | 0.05 |
| E2 | SPM2 | 7A | AX.89752478 | 9.14E+07 | 0.12 | 17.97  | 3.08 | 0.05 |
| E2 | SPM2 | 7A | AX.89741339 | 8.38E+07 | 0.48 | -12.14 | 3.27 | 0.06 |
| E2 | SPM2 | 7A | AX.89614860 | 6.40E+08 | 0.17 | 17.34  | 3.73 | 0.06 |
| E2 | SPM2 | 7A | AX.89508141 | 9.14E+07 | 0.08 | 23.71  | 3.58 | 0.06 |
| E2 | SPM2 | 7A | AX.89667694 | 8.53E+07 | 0.48 | -12.62 | 3.50 | 0.06 |
| E2 | SPM2 | 7A | AX.89746781 | 8.53E+07 | 0.48 | -12.62 | 3.50 | 0.06 |
| E2 | SPM2 | 7A | AX.89773032 | 8.53E+07 | 0.48 | -12.62 | 3.50 | 0.06 |
| E2 | GPM2 | 7A | AX.89733210 | 6.21E+08 | 0.10 | 871.08 | 3.50 | 0.07 |
| E2 | TKW  | 7A | AX.89464638 | 8.54E+07 | 0.23 | -1.14  | 3.31 | 0.06 |
| E2 | SPM2 | 7A | AX.89425039 | 9.14E+07 | 0.08 | 23.71  | 3.58 | 0.06 |
| E2 | SPM2 | 7A | AX.89490892 | 6.29E+08 | 0.25 | 14.23  | 3.33 | 0.06 |
| E2 | SPM2 | 7A | AX.89571170 | 8.52E+07 | 0.47 | -11.71 | 3.07 | 0.05 |
| E2 | SPM2 | 7A | AX.89393785 | 8.53E+07 | 0.48 | -12.62 | 3.50 | 0.06 |
| E2 | TKW  | 7A | AX.89738666 | 6.48E+08 | 0.23 | -1.32  | 4.20 | 0.07 |
| E2 | TKW  | 7A | AX.89616620 | 2.44E+08 | 0.46 | -0.92  | 3.03 | 0.05 |
| E2 | GY   | 7A | AX.89503581 | 6.86E+06 | 0.36 | -1.96  | 3.02 | 0.06 |
| E2 | GY   | 7A | AX.89503581 | 6.86E+06 | 0.36 | -1.96  | 3.02 | 0.06 |
| E2 | TKW  | 7A | AX.89324155 | 9.25E+07 | 0.13 | -1.45  | 3.31 | 0.06 |
| E2 | TKW  | 7A | AX.89655050 | 2.45E+08 | 0.46 | -0.92  | 3.03 | 0.05 |
| E2 | TKW  | 7A | AX.89607233 | 2.02E+08 | 0.38 | 1.02   | 3.45 | 0.06 |
| E2 | GY   | 7A | AX.89754726 | 1.13E+08 | 0.19 | -2.47  | 3.18 | 0.05 |
| E2 | GY   | 7A | AX.89754726 | 1.13E+08 | 0.19 | -2.47  | 3.18 | 0.05 |
| E2 | GPM2 | 7A | AX.89374570 | 6.21E+08 | 0.10 | 871.08 | 3.50 | 0.07 |
| E2 | GY   | 7A | AX.89393977 | 6.13E+08 | 0.41 | -1.95  | 3.11 | 0.04 |
| E2 | GY   | 7A | AX.89393977 | 6.13E+08 | 0.41 | -1.95  | 3.11 | 0.04 |
| E2 | TKW  | 7A | AX.89470936 | 7.11E+08 | 0.31 | -1.03  | 3.23 | 0.06 |
| E2 | GY   | 7A | AX.89455713 | 4.77E+07 | 0.07 | -4.63  | 4.29 | 0.06 |
| E2 | GY   | 7A | AX.89455713 | 4.77E+07 | 0.07 | -4.63  | 4.29 | 0.06 |
| E2 | TKW  | 7A | AX.89565462 | 9.25E+07 | 0.13 | -1.48  | 3.53 | 0.06 |
| E2 | TKW  | 7A | AX.89400115 | 9.19E+07 | 0.11 | -1.51  | 3.26 | 0.06 |
| E2 | TKW  | 7A | AX.89659553 | 2.44E+08 | 0.47 | -0.96  | 3.27 | 0.05 |
| E2 | GY   | 7A | AX.89655850 | 4.77E+07 | 0.07 | -4.63  | 4.29 | 0.06 |
| E2 | TKW  | 7A | AX.89310792 | 8.54E+07 | 0.23 | -1.15  | 3.30 | 0.06 |
| E2 | TKW  | 7A | AX.89762809 | 6.47E+08 | 0.24 | -1.17  | 3.55 | 0.06 |
| E2 | TKW  | 7A | AX.89568365 | 6.48E+08 | 0.19 | -1.23  | 3.28 | 0.05 |
| E2 | GY   | 7A | AX.89474325 | 4.76E+07 | 0.05 | -4.53  | 3.40 | 0.05 |
| E2 | TKW  | 7A | AX.89558931 | 2.44E+08 | 0.47 | -0.96  | 3.27 | 0.05 |
| E2 | TKW  | 7A | AX.89594145 | 2.44E+08 | 0.46 | -0.92  | 3.03 | 0.05 |
| E2 | TKW  | 7A | AX.89327554 | 1.72E+06 | 0.25 | -1.12  | 3.36 | 0.06 |
| E2 | TKW  | 7A | AX.89442360 | 2.45E+08 | 0.47 | -0.96  | 3.27 | 0.05 |
| E2 | TKW  | 7A | AX.89516270 | 9.21E+07 | 0.13 | -1.48  | 3.53 | 0.06 |
| E2 | TKW  | 7A | AX.89628948 | 2.44E+08 | 0.47 | -0.94  | 3.19 | 0.05 |
| E2 | GPM2 | 7A | AX.89367673 | 1.35E+08 | 0.48 | 552.24 | 3.85 | 0.07 |
| E2 | GPM2 | 7A | AX.89532520 | 6.21E+08 | 0.10 | 871.08 | 3.50 | 0.07 |
| E2 | TKW  | 7A | AX.89726434 | 8.54E+07 | 0.23 | -1.15  | 3.30 | 0.06 |



|    |     |    |             |          |      |       |      |      |
|----|-----|----|-------------|----------|------|-------|------|------|
| E2 | TKW | 7A | AX.89722718 | 8.54E+07 | 0.23 | -1.14 | 3.31 | 0.06 |
| E2 | TKW | 7A | AX.89456167 | 9.53E+06 | 0.19 | -1.28 | 3.53 | 0.06 |
| E2 | GY  | 7A | AX.89383516 | 4.76E+07 | 0.09 | -3.96 | 4.18 | 0.06 |
| E2 | TKW | 7A | AX.89653667 | 9.31E+07 | 0.14 | -1.33 | 3.02 | 0.05 |
| E2 | TKW | 7A | AX.89513616 | 9.31E+07 | 0.14 | -1.33 | 3.02 | 0.05 |
| E2 | TKW | 7A | AX.89471369 | 7.13E+08 | 0.23 | -1.09 | 3.02 | 0.05 |
| E2 | TKW | 7A | AX.89600921 | 2.44E+08 | 0.47 | -0.96 | 3.27 | 0.05 |
| E2 | TKW | 7A | AX.89414061 | 2.44E+08 | 0.47 | -0.96 | 3.27 | 0.05 |
| E2 | TKW | 7A | AX.89668647 | 9.66E+07 | 0.12 | -1.47 | 3.22 | 0.06 |
| E2 | TKW | 7A | AX.89556024 | 9.24E+07 | 0.13 | -1.48 | 3.53 | 0.06 |
| E2 | TKW | 7A | AX.89445359 | 9.30E+07 | 0.14 | -1.33 | 3.02 | 0.05 |
| E2 | TKW | 7A | AX.89756658 | 2.44E+08 | 0.46 | -0.92 | 3.03 | 0.05 |
| E2 | TKW | 7A | AX.89563839 | 6.48E+08 | 0.23 | -1.32 | 4.20 | 0.07 |
| E2 | TKW | 7A | AX.86168039 | 6.47E+08 | 0.24 | -1.07 | 3.06 | 0.05 |
| E2 | TKW | 7A | AX.89317732 | 2.71E+07 | 0.41 | -0.95 | 3.15 | 0.05 |
| E2 | TKW | 7A | AX.89655079 | 8.54E+07 | 0.23 | -1.14 | 3.31 | 0.06 |
| E2 | TKW | 7A | AX.89546002 | 2.44E+08 | 0.47 | -0.96 | 3.27 | 0.05 |
| E2 | GY  | 7A | AX.89383516 | 4.76E+07 | 0.09 | -3.96 | 4.18 | 0.06 |
| E2 | TKW | 7A | AX.89609258 | 6.47E+08 | 0.18 | -1.21 | 3.09 | 0.05 |
| E2 | TKW | 7A | AX.89777832 | 9.29E+07 | 0.13 | -1.48 | 3.53 | 0.06 |
| E2 | TKW | 7A | AX.89451059 | 7.24E+08 | 0.11 | -1.44 | 3.03 | 0.05 |
| E2 | TKW | 7A | AX.89567196 | 2.38E+08 | 0.39 | 1.00  | 3.42 | 0.06 |
| E2 | TKW | 7A | AX.89505927 | 8.54E+07 | 0.23 | -1.15 | 3.30 | 0.06 |
| E2 | TKW | 7A | AX.89708661 | 2.71E+07 | 0.41 | -0.95 | 3.15 | 0.05 |
| E2 | TKW | 7A | AX.89528732 | 6.47E+08 | 0.19 | -1.23 | 3.28 | 0.05 |
| E2 | TKW | 7A | AX.89515531 | 8.54E+07 | 0.23 | -1.14 | 3.31 | 0.06 |
| E2 | TKW | 7A | AX.89739831 | 9.31E+07 | 0.14 | -1.33 | 3.02 | 0.05 |
| E2 | TKW | 7A | AX.89546999 | 9.24E+07 | 0.13 | -1.48 | 3.53 | 0.06 |
| E2 | TKW | 7A | AX.89369333 | 6.48E+08 | 0.23 | -1.32 | 4.20 | 0.07 |
| E2 | TKW | 7A | AX.89523870 | 9.26E+07 | 0.13 | -1.48 | 3.53 | 0.06 |
| E2 | GY  | 7A | AX.89388162 | 1.20E+07 | 0.48 | -1.89 | 3.01 | 0.06 |
| E2 | TKW | 7A | AX.89490717 | 9.24E+07 | 0.11 | -1.51 | 3.27 | 0.06 |
| E2 | TKW | 7A | AX.89774808 | 7.12E+08 | 0.23 | -1.11 | 3.16 | 0.05 |
| E2 | TKW | 7A | AX.89744789 | 2.44E+08 | 0.46 | -0.92 | 3.03 | 0.05 |
| E2 | TKW | 7A | AX.89560087 | 2.09E+08 | 0.29 | 1.00  | 3.01 | 0.05 |
| E2 | TKW | 7A | AX.89738372 | 9.29E+07 | 0.13 | -1.48 | 3.53 | 0.06 |
| E2 | TKW | 7A | AX.89530196 | 9.19E+07 | 0.13 | -1.48 | 3.53 | 0.06 |
| E2 | TKW | 7A | AX.89651291 | 2.71E+07 | 0.42 | -0.93 | 3.06 | 0.05 |
| E2 | TKW | 7A | AX.89743153 | 9.25E+07 | 0.13 | -1.48 | 3.53 | 0.06 |
| E2 | TKW | 7A | AX.89382385 | 9.24E+07 | 0.13 | -1.48 | 3.53 | 0.06 |
| E2 | TKW | 7A | AX.86163741 | 6.47E+08 | 0.19 | -1.23 | 3.28 | 0.05 |
| E2 | TKW | 7A | AX.89559201 | 9.31E+07 | 0.14 | -1.33 | 3.02 | 0.05 |
| E2 | TKW | 7A | AX.89527321 | 1.93E+08 | 0.46 | 0.97  | 3.29 | 0.05 |
| E2 | TKW | 7A | AX.89577128 | 7.12E+08 | 0.31 | -1.07 | 3.49 | 0.07 |
| E2 | GY  | 7A | AX.89597326 | 6.85E+06 | 0.38 | -1.98 | 3.13 | 0.06 |
| E2 | TKW | 7A | AX.89456953 | 9.31E+07 | 0.14 | -1.33 | 3.02 | 0.05 |
| E2 | TKW | 7A | AX.89655282 | 2.44E+08 | 0.47 | -0.96 | 3.27 | 0.05 |
| E2 | TKW | 7A | AX.89583849 | 2.44E+08 | 0.47 | -0.96 | 3.27 | 0.05 |
| E2 | TKW | 7A | AX.89492125 | 2.44E+08 | 0.47 | -0.96 | 3.27 | 0.05 |
| E2 | TKW | 7A | AX.89699004 | 2.44E+08 | 0.46 | -0.92 | 3.03 | 0.05 |

|    |      |    |             |          |      |          |      |      |
|----|------|----|-------------|----------|------|----------|------|------|
| E2 | TKW  | 7A | AX.89499809 | 9.31E+07 | 0.14 | -1.33    | 3.02 | 0.05 |
| E2 | TKW  | 7A | AX.86168877 | 6.47E+08 | 0.23 | -1.32    | 4.20 | 0.07 |
| E2 | TKW  | 7A | AX.89748563 | 2.44E+08 | 0.47 | -0.96    | 3.27 | 0.05 |
| E2 | GY   | 7A | AX.89388162 | 1.20E+07 | 0.48 | -1.89    | 3.01 | 0.06 |
| E2 | TKW  | 7A | AX.89464561 | 9.31E+07 | 0.14 | -1.33    | 3.02 | 0.05 |
| E2 | TKW  | 7A | AX.89636079 | 9.19E+07 | 0.15 | -1.49    | 3.85 | 0.07 |
| E2 | TKW  | 7A | AX.89581578 | 6.48E+08 | 0.23 | -1.32    | 4.20 | 0.07 |
| E2 | GY   | 7A | AX.89597326 | 6.85E+06 | 0.38 | -1.98    | 3.13 | 0.06 |
| E2 | TKW  | 7A | AX.89596449 | 9.22E+07 | 0.13 | -1.48    | 3.53 | 0.06 |
| E2 | TKW  | 7A | AX.89326929 | 6.47E+08 | 0.24 | -1.17    | 3.55 | 0.06 |
| E2 | TKW  | 7A | AX.89506329 | 9.31E+07 | 0.14 | -1.33    | 3.02 | 0.05 |
| E2 | TKW  | 7A | AX.89540561 | 8.54E+07 | 0.23 | -1.14    | 3.31 | 0.06 |
| E2 | GPM2 | 7A | AX.89754263 | 6.21E+08 | 0.10 | 871.08   | 3.50 | 0.07 |
| E2 | TKW  | 7A | AX.89478535 | 7.10E+08 | 0.35 | -0.98    | 3.16 | 0.06 |
| E2 | TKW  | 7A | AX.89597147 | 9.76E+07 | 0.14 | -1.32    | 3.06 | 0.05 |
| E2 | TKW  | 7A | AX.89367673 | 1.35E+08 | 0.48 | -0.95    | 3.24 | 0.06 |
| E2 | TKW  | 7A | AX.89695436 | 2.71E+07 | 0.42 | -0.93    | 3.06 | 0.05 |
| E2 | TKW  | 7A | AX.89765922 | 9.31E+07 | 0.15 | -1.37    | 3.33 | 0.06 |
| E2 | TKW  | 7A | AX.89548934 | 2.71E+07 | 0.41 | -0.95    | 3.15 | 0.05 |
| E2 | GY   | 7A | AX.89754578 | 6.92E+08 | 0.21 | -2.84    | 4.29 | 0.06 |
| E2 | TKW  | 7A | AX.89334123 | 9.22E+07 | 0.13 | -1.48    | 3.53 | 0.06 |
| E2 | GPM2 | 7A | AX.89411187 | 6.21E+08 | 0.10 | 871.08   | 3.50 | 0.07 |
| E2 | TKW  | 7A | AX.89681811 | 8.54E+07 | 0.23 | -1.14    | 3.31 | 0.06 |
| E2 | TKW  | 7A | AX.89591873 | 9.29E+07 | 0.13 | -1.48    | 3.53 | 0.06 |
| E2 | TKW  | 7A | AX.89767696 | 9.31E+07 | 0.14 | -1.33    | 3.02 | 0.05 |
| E2 | TKW  | 7A | AX.89364823 | 9.24E+07 | 0.13 | -1.48    | 3.53 | 0.06 |
| E2 | TKW  | 7A | AX.89411491 | 8.54E+07 | 0.23 | -1.15    | 3.30 | 0.06 |
| E2 | TKW  | 7A | AX.89524117 | 2.44E+08 | 0.46 | -0.92    | 3.03 | 0.05 |
| E2 | TKW  | 7A | AX.89662707 | 6.47E+08 | 0.19 | -1.23    | 3.28 | 0.05 |
| E2 | TKW  | 7A | AX.89723217 | 9.19E+07 | 0.15 | -1.55    | 4.20 | 0.08 |
| E2 | TKW  | 7A | AX.89661348 | 1.58E+08 | 0.14 | -1.43    | 3.39 | 0.06 |
| E2 | TKW  | 7A | AX.89460324 | 1.54E+08 | 0.28 | 1.10     | 3.46 | 0.06 |
| E2 | TKW  | 7A | AX.89457168 | 1.44E+08 | 0.14 | -1.43    | 3.39 | 0.06 |
| E2 | TKW  | 7A | AX.89487442 | 7.12E+08 | 0.22 | -1.17    | 3.34 | 0.06 |
| E2 | TKW  | 7A | AX.89554314 | 9.65E+07 | 0.12 | -1.47    | 3.22 | 0.06 |
| E2 | TKW  | 7A | AX.89512482 | 2.44E+08 | 0.47 | -0.96    | 3.27 | 0.05 |
| E2 | GY   | 7A | AX.89754578 | 6.92E+08 | 0.21 | -2.84    | 4.29 | 0.06 |
| E2 | TKW  | 7A | AX.89438086 | 9.27E+07 | 0.13 | -1.48    | 3.53 | 0.06 |
| E2 | TKW  | 7A | AX.89757701 | 9.76E+07 | 0.12 | -1.47    | 3.22 | 0.06 |
| E2 | TKW  | 7A | AX.89739023 | 6.47E+08 | 0.19 | -1.23    | 3.28 | 0.05 |
| E2 | TKW  | 7A | AX.89724295 | 6.48E+08 | 0.19 | -1.23    | 3.28 | 0.05 |
| E3 | GPM2 | 7A | AX.89570857 | 5.38E+08 | 0.18 | -1102.29 | 3.10 | 0.06 |
| E3 | GPM2 | 7A | AX.89485756 | 5.39E+08 | 0.15 | -1134.83 | 3.18 | 0.00 |
| E3 | GPS  | 7A | AX.89722349 | 3.92E+07 | 0.39 | 2.07     | 3.01 | 0.10 |
| E3 | GY   | 7A | AX.89310828 | 5.64E+07 | 0.07 | 5.39     | 3.35 | 0.04 |
| E3 | GY   | 7A | AX.89393409 | 2.33E+08 | 0.12 | -4.59    | 3.10 | 0.06 |
| E3 | GY   | 7A | AX.89589823 | 5.80E+08 | 0.26 | -3.42    | 3.02 | 0.06 |
| E3 | TKW  | 7A | AX.89547571 | 6.18E+08 | 0.40 | 0.86     | 3.19 | 0.06 |
| E3 | TKW  | 7A | AX.89729033 | 6.90E+08 | 0.20 | 1.16     | 3.43 | 0.13 |
| E3 | TKW  | 7A | AX.89442921 | 6.95E+08 | 0.24 | -0.98    | 3.31 | 0.04 |

|    |      |    |               |          |      |        |      |      |
|----|------|----|---------------|----------|------|--------|------|------|
| E3 | TKW  | 7A | AX.89462447   | 6.95E+08 | 0.24 | -1.06  | 3.78 | 0.04 |
| E3 | TKW  | 7A | AX.89399371   | 6.95E+08 | 0.25 | -0.94  | 3.11 | 0.04 |
| E3 | TKW  | 7A | AX.89526831   | 7.01E+08 | 0.33 | 0.92   | 3.03 | 0.14 |
| E3 | SPM2 | 7A | AX.89336359   | 5.50E+07 | 0.17 | 27.33  | 3.19 | 0.09 |
| E3 | SPM2 | 7A | AX.89355609   | 5.54E+07 | 0.18 | 29.77  | 3.99 | 0.08 |
| E3 | SPM2 | 7A | AX.89411886   | 5.54E+07 | 0.18 | 26.13  | 3.15 | 0.07 |
| E3 | TKW  | 7A | AX.89507777   | 4.82E+07 | 0.19 | 1.11   | 3.15 | 0.10 |
| E3 | TKW  | 7A | AX.89570857   | 5.38E+08 | 0.18 | 1.09   | 3.07 | 0.07 |
| E4 | GPM2 | 7A | AX.89657710   | 6.11E+08 | 0.25 | 521.44 | 3.48 | 0.05 |
| E4 | GPM2 | 7A | AX.89468430   | 6.11E+08 | 0.26 | 510.08 | 3.39 | 0.05 |
| E4 | GPM2 | 7A | AX.89368907   | 6.11E+08 | 0.25 | 528.28 | 3.59 | 0.05 |
| E4 | GPM2 | 7A | AX.89683691   | 6.11E+08 | 0.25 | 521.44 | 3.48 | 0.05 |
| E4 | GPM2 | 7A | AX.89527896   | 6.11E+08 | 0.25 | 521.44 | 3.48 | 0.05 |
| E4 | GPM2 | 7A | AX.89324393   | 6.11E+08 | 0.25 | 495.28 | 3.19 | 0.05 |
| E4 | GPM2 | 7A | AX.89592969   | 6.11E+08 | 0.26 | 510.08 | 3.39 | 0.05 |
| E4 | GPM2 | 7A | AX.89494441   | 6.11E+08 | 0.25 | 521.44 | 3.48 | 0.05 |
| E4 | GPS  | 7A | AX.89683923   | 7.30E+08 | 0.27 | -1.60  | 3.05 | 0.03 |
| E4 | GPS  | 7A | AX.89327720   | 7.63E+07 | 0.38 | -1.51  | 3.02 | 0.05 |
| E4 | GPS  | 7A | AX.89382787   | 7.63E+07 | 0.38 | -1.51  | 3.02 | 0.05 |
| E4 | GY   | 7A | AX.89502546   | 6.26E+08 | 0.41 | 1.54   | 3.15 | 0.05 |
| E4 | GY   | 7A | AX.89577081   | 6.27E+08 | 0.44 | -1.49  | 3.06 | 0.05 |
| E4 | GY   | 7A | AX.89376670   | 6.27E+08 | 0.47 | -1.55  | 3.26 | 0.06 |
| E4 | GY   | 7A | AX.89474076   | 7.12E+08 | 0.41 | -1.52  | 3.19 | 0.04 |
| E4 | GY   | 7A | AX.89575405   | 7.12E+08 | 0.44 | -1.45  | 3.01 | 0.04 |
| E4 | GY   | 7A | AX.89682971   | 7.13E+08 | 0.35 | -1.52  | 3.00 | 0.04 |
| E4 | GY   | 7A | AX.89566960   | 7.13E+08 | 0.35 | -1.52  | 3.00 | 0.04 |
| E4 | GY   | 7A | AX.89498653   | 7.16E+08 | 0.38 | 1.52   | 3.03 | 0.04 |
| E4 | GPS  | 7A | AX.89401082   | 7.64E+07 | 0.38 | -1.52  | 3.03 | 0.05 |
| E4 | GPS  | 7A | AX.89707942   | 7.65E+07 | 0.37 | -1.60  | 3.31 | 0.06 |
| E4 | GPS  | 7A | AX.89430333   | 7.65E+07 | 0.38 | -1.56  | 3.17 | 0.05 |
| E4 | GPS  | 7A | AX.89746821   | 7.64E+07 | 0.38 | -1.56  | 3.17 | 0.05 |
| E4 | GPS  | 7A | AX.89390000   | 7.64E+07 | 0.38 | -1.56  | 3.17 | 0.05 |
| E4 | GPS  | 7A | AX.89334823   | 7.29E+08 | 0.33 | -1.63  | 3.31 | 0.04 |
| E4 | GPS  | 7A | AX.89761639   | 7.30E+08 | 0.32 | -1.59  | 3.15 | 0.04 |
| E4 | GPS  | 7A | AX.89575998   | 7.65E+07 | 0.38 | -1.56  | 3.17 | 0.05 |
| E4 | GPS  | 7A | AX.89330322   | 7.65E+07 | 0.38 | -1.56  | 3.17 | 0.05 |
| E4 | GPS  | 7A | AX.89613698   | 7.63E+07 | 0.38 | -1.56  | 3.17 | 0.05 |
| E4 | GPS  | 7A | AX.89562292   | 7.63E+07 | 0.38 | -1.55  | 3.14 | 0.05 |
| E4 | GY   | 7A | AX.89406368   | 5.80E+08 | 0.23 | -2.02  | 3.65 | 0.07 |
| E4 | GY   | 7A | AX.89637941   | 5.80E+08 | 0.20 | -1.96  | 3.16 | 0.06 |
| E4 | GY   | 7A | AX.89374967   | 5.83E+08 | 0.20 | -1.92  | 3.05 | 0.06 |
| E4 | GY   | 7A | AX.89622170   | 6.09E+08 | 0.22 | -1.88  | 3.17 | 0.07 |
| E4 | GY   | 7A | AX.89459548   | 6.11E+08 | 0.47 | 1.59   | 3.41 | 0.06 |
| E4 | GY   | 7A | AX.89367435   | 6.11E+08 | 0.49 | 1.62   | 3.57 | 0.07 |
| E4 | GY   | 7A | AX.89454931   | 5.75E+08 | 0.21 | -1.95  | 3.26 | 0.06 |
| E4 | GY   | 7A | AX.89698201   | 5.75E+08 | 0.20 | -2.05  | 3.48 | 0.07 |
| E4 | GY   | 7A | AX.89395637   | 5.75E+08 | 0.20 | -2.05  | 3.48 | 0.07 |
| E4 | GY   | 7A | X.89647087_OT | 5.75E+08 | 0.20 | -2.00  | 3.32 | 0.06 |
| E4 | GY   | 7A | X.89491322_OT | 5.75E+08 | 0.20 | -2.37  | 4.55 | 0.08 |
| E4 | GY   | 7A | AX.89317202   | 5.76E+08 | 0.21 | -1.94  | 3.22 | 0.06 |

|    |      |    |             |          |      |        |      |      |
|----|------|----|-------------|----------|------|--------|------|------|
| E4 | GY   | 7A | AX.89310421 | 5.75E+08 | 0.21 | -1.86  | 3.03 | 0.06 |
| E4 | GY   | 7A | AX.89666394 | 5.80E+08 | 0.22 | -1.96  | 3.42 | 0.07 |
| E4 | GY   | 7A | AX.89525682 | 5.80E+08 | 0.21 | -2.03  | 3.56 | 0.06 |
| E4 | SPM2 | 7A | AX.89511873 | 1.95E+07 | 0.14 | -24.03 | 3.28 | 0.05 |
| E4 | SPM2 | 7A | AX.89557808 | 2.00E+07 | 0.18 | -20.51 | 3.08 | 0.03 |
| E4 | SPM2 | 7A | AX.89345079 | 3.11E+07 | 0.31 | -17.15 | 3.14 | 0.03 |
| E4 | SPM2 | 7A | AX.89607031 | 8.99E+07 | 0.07 | 30.26  | 3.04 | 0.03 |
| E4 | SPM2 | 7A | AX.89368186 | 1.46E+08 | 0.08 | 28.82  | 3.14 | 0.07 |
| E4 | SPM2 | 7A | AX.89558597 | 1.60E+08 | 0.06 | 40.03  | 3.98 | 0.09 |
| E4 | SPM2 | 7A | AX.89661967 | 2.05E+08 | 0.06 | 34.21  | 3.29 | 0.07 |
| E4 | SPM2 | 7A | AX.89321375 | 2.24E+08 | 0.07 | 33.43  | 3.42 | 0.07 |
| E4 | SPM2 | 7A | AX.89518487 | 2.33E+08 | 0.08 | 30.68  | 3.12 | 0.07 |
| E4 | SPM2 | 7A | AX.89444418 | 3.48E+08 | 0.09 | 30.74  | 3.72 | 0.07 |
| E4 | TKW  | 7A | AX.89539865 | 6.25E+07 | 0.33 | -0.89  | 3.03 | 0.09 |
| E4 | TKW  | 7A | AX.89493102 | 5.73E+08 | 0.32 | 0.87   | 3.03 | 0.09 |
| E4 | TKW  | 7A | AX.89584122 | 5.76E+08 | 0.34 | 0.89   | 3.10 | 0.09 |
| E4 | TKW  | 7A | AX.89529897 | 6.66E+08 | 0.12 | 1.43   | 3.81 | 0.01 |
| E4 | TKW  | 7A | AX.89630231 | 6.69E+08 | 0.11 | 1.28   | 3.08 | 0.01 |
| E4 | TKW  | 7A | AX.89349756 | 6.72E+08 | 0.27 | 1.10   | 4.11 | 0.02 |
| E4 | TKW  | 7A | AX.89520446 | 6.72E+08 | 0.32 | 0.90   | 3.04 | 0.00 |
| E4 | TKW  | 7A | AX.89668053 | 6.74E+08 | 0.33 | 0.89   | 3.16 | 0.01 |
| E4 | TKW  | 7A | AX.89764215 | 6.74E+08 | 0.33 | 0.90   | 3.24 | 0.01 |
| E4 | TKW  | 7A | AX.89592875 | 7.10E+08 | 0.16 | -1.03  | 3.04 | 0.02 |
| E4 | TKW  | 7A | AX.89433881 | 7.10E+08 | 0.16 | -1.03  | 3.04 | 0.02 |
| E4 | TKW  | 7A | AX.89575405 | 7.12E+08 | 0.43 | -0.84  | 3.29 | 0.06 |
| E1 | GY   | 7B | AX.89422790 | 7.09E+08 | 0.46 | 2.55   | 3.73 | 0.07 |
| E1 | GY   | 7B | AX.89326836 | 6.11E+08 | 0.08 | -4.79  | 4.01 | 0.06 |
| E1 | GY   | 7B | AX.89637049 | 7.09E+08 | 0.43 | 2.38   | 3.27 | 0.06 |
| E1 | GY   | 7B | AX.89544298 | 7.09E+08 | 0.43 | 2.32   | 3.13 | 0.06 |
| E1 | GY   | 7B | AX.89402723 | 5.95E+08 | 0.13 | -3.61  | 3.35 | 0.06 |
| E1 | GY   | 7B | AX.89544298 | 7.09E+08 | 0.43 | 2.32   | 3.13 | 0.06 |
| E1 | GY   | 7B | AX.89628690 | 3.39E+07 | 0.07 | -4.52  | 3.31 | 0.06 |
| E1 | GY   | 7B | AX.89503859 | 3.39E+07 | 0.08 | -4.35  | 3.25 | 0.06 |
| E1 | GY   | 7B | AX.89439688 | 3.18E+07 | 0.05 | -5.94  | 3.62 | 0.07 |
| E1 | GY   | 7B | AX.89353636 | 7.09E+08 | 0.43 | 2.27   | 3.01 | 0.05 |
| E1 | GY   | 7B | AX.89463761 | 7.09E+08 | 0.44 | 2.48   | 3.53 | 0.07 |
| E1 | GY   | 7B | AX.89687662 | 4.90E+06 | 0.20 | -2.83  | 3.01 | 0.05 |
| E1 | GY   | 7B | AX.89442633 | 7.22E+08 | 0.20 | -3.24  | 3.79 | 0.06 |
| E1 | GY   | 7B | AX.89376058 | 7.09E+08 | 0.40 | 2.35   | 3.15 | 0.06 |
| E1 | GY   | 7B | AX.89732098 | 7.22E+08 | 0.28 | -2.73  | 3.50 | 0.05 |
| E1 | GY   | 7B | AX.89422448 | 7.11E+08 | 0.34 | -2.49  | 3.28 | 0.06 |
| E1 | GY   | 7B | AX.89535574 | 7.09E+08 | 0.15 | -3.91  | 4.36 | 0.08 |
| E1 | GY   | 7B | AX.89610838 | 7.09E+08 | 0.43 | 2.38   | 3.27 | 0.06 |
| E1 | GY   | 7B | AX.89531154 | 7.09E+08 | 0.43 | 2.38   | 3.27 | 0.06 |
| E1 | GY   | 7B | AX.89637049 | 7.09E+08 | 0.43 | 2.38   | 3.27 | 0.06 |
| E1 | GY   | 7B | AX.89633557 | 7.14E+08 | 0.44 | -2.35  | 3.22 | 0.05 |
| E1 | GY   | 7B | AX.89387103 | 7.23E+08 | 0.26 | -2.63  | 3.16 | 0.05 |
| E1 | GY   | 7B | AX.89344849 | 7.22E+08 | 0.28 | -2.74  | 3.55 | 0.05 |
| E1 | GY   | 7B | AX.89770281 | 7.22E+08 | 0.28 | -2.73  | 3.50 | 0.05 |
| E1 | GY   | 7B | AX.89734790 | 3.39E+07 | 0.08 | -4.35  | 3.25 | 0.06 |

|    |      |    |             |          |      |       |      |      |
|----|------|----|-------------|----------|------|-------|------|------|
| E1 | GY   | 7B | AX.89455659 | 6.78E+07 | 0.07 | -5.35 | 3.99 | 0.06 |
| E1 | GY   | 7B | AX.89455659 | 6.78E+07 | 0.07 | -5.35 | 3.99 | 0.06 |
| E1 | GY   | 7B | AX.89531154 | 7.09E+08 | 0.43 | 2.38  | 3.27 | 0.06 |
| E1 | GY   | 7B | AX.89594740 | 6.11E+08 | 0.08 | -4.79 | 4.01 | 0.06 |
| E1 | GY   | 7B | AX.89525378 | 7.24E+08 | 0.20 | -3.09 | 3.55 | 0.05 |
| E1 | GY   | 7B | AX.89356144 | 7.09E+08 | 0.43 | 2.38  | 3.27 | 0.06 |
| E1 | GY   | 7B | AX.89326836 | 6.11E+08 | 0.08 | -4.79 | 4.01 | 0.06 |
| E1 | GY   | 7B | AX.89397065 | 7.09E+08 | 0.43 | 2.32  | 3.13 | 0.06 |
| E1 | GY   | 7B | AX.89744030 | 7.09E+08 | 0.43 | 2.38  | 3.27 | 0.06 |
| E1 | GY   | 7B | AX.89422373 | 3.38E+07 | 0.08 | -4.53 | 3.49 | 0.07 |
| E1 | GY   | 7B | AX.89422373 | 3.38E+07 | 0.08 | -4.53 | 3.49 | 0.07 |
| E1 | GY   | 7B | AX.89535574 | 7.09E+08 | 0.15 | -3.91 | 4.36 | 0.08 |
| E1 | GY   | 7B | AX.89376058 | 7.09E+08 | 0.40 | 2.35  | 3.15 | 0.06 |
| E1 | GY   | 7B | AX.89539778 | 7.09E+08 | 0.43 | 2.38  | 3.27 | 0.06 |
| E1 | GY   | 7B | AX.89539778 | 7.09E+08 | 0.43 | 2.38  | 3.27 | 0.06 |
| E1 | GY   | 7B | AX.89439281 | 4.32E+06 | 0.20 | -2.83 | 3.01 | 0.05 |
| E1 | GY   | 7B | AX.89365162 | 7.23E+08 | 0.20 | -3.10 | 3.51 | 0.05 |
| E1 | GY   | 7B | AX.89541447 | 6.78E+07 | 0.07 | -5.35 | 3.99 | 0.06 |
| E1 | GY   | 7B | AX.89541447 | 6.78E+07 | 0.07 | -5.35 | 3.99 | 0.06 |
| E1 | GY   | 7B | AX.89389066 | 7.24E+08 | 0.20 | -3.09 | 3.55 | 0.05 |
| E1 | GY   | 7B | AX.89438204 | 3.39E+07 | 0.08 | -4.35 | 3.25 | 0.06 |
| E1 | GY   | 7B | AX.89713490 | 7.09E+08 | 0.11 | -4.11 | 3.72 | 0.07 |
| E1 | GY   | 7B | AX.89450411 | 7.11E+08 | 0.34 | -2.47 | 3.23 | 0.06 |
| E1 | GY   | 7B | AX.89450411 | 7.11E+08 | 0.34 | -2.47 | 3.23 | 0.06 |
| E1 | GY   | 7B | AX.89344849 | 7.22E+08 | 0.28 | -2.74 | 3.55 | 0.05 |
| E1 | GY   | 7B | AX.89651495 | 6.11E+08 | 0.08 | -4.79 | 4.01 | 0.06 |
| E1 | GY   | 7B | AX.89770281 | 7.22E+08 | 0.28 | -2.73 | 3.50 | 0.05 |
| E1 | GY   | 7B | AX.89439688 | 3.18E+07 | 0.05 | -5.94 | 3.62 | 0.07 |
| E1 | GY   | 7B | AX.89653289 | 7.11E+08 | 0.34 | -2.38 | 3.06 | 0.06 |
| E1 | GY   | 7B | AX.89439206 | 7.09E+08 | 0.29 | -2.57 | 3.21 | 0.05 |
| E1 | GY   | 7B | AX.89537754 | 7.22E+08 | 0.28 | -2.73 | 3.50 | 0.05 |
| E1 | GY   | 7B | AX.89628690 | 3.39E+07 | 0.07 | -4.52 | 3.31 | 0.06 |
| E1 | GY   | 7B | AX.89496578 | 4.89E+06 | 0.20 | -2.83 | 3.01 | 0.05 |
| E1 | GY   | 7B | AX.89629742 | 7.09E+08 | 0.43 | 2.38  | 3.27 | 0.06 |
| E1 | GY   | 7B | AX.89525378 | 7.24E+08 | 0.20 | -3.09 | 3.55 | 0.05 |
| E1 | GY   | 7B | AX.89604264 | 6.11E+08 | 0.09 | -4.69 | 4.03 | 0.06 |
| E1 | GY   | 7B | AX.89373466 | 3.38E+07 | 0.09 | -4.14 | 3.26 | 0.06 |
| E1 | GY   | 7B | AX.89537754 | 7.22E+08 | 0.28 | -2.73 | 3.50 | 0.05 |
| E1 | SPM2 | 7B | AX.89502259 | 1.26E+06 | 0.44 | 18.34 | 3.68 | 0.07 |
| E1 | GY   | 7B | AX.89744299 | 4.90E+06 | 0.20 | -2.83 | 3.01 | 0.05 |
| E1 | GY   | 7B | AX.89721401 | 3.40E+07 | 0.08 | -4.35 | 3.25 | 0.06 |
| E1 | GY   | 7B | AX.89539917 | 7.23E+08 | 0.18 | -3.05 | 3.21 | 0.05 |
| E1 | GY   | 7B | AX.89356144 | 7.09E+08 | 0.43 | 2.38  | 3.27 | 0.06 |
| E1 | GY   | 7B | AX.89387103 | 7.23E+08 | 0.26 | -2.63 | 3.16 | 0.05 |
| E1 | GY   | 7B | AX.89518585 | 7.24E+08 | 0.18 | -2.97 | 3.06 | 0.04 |
| E1 | GY   | 7B | AX.89353636 | 7.09E+08 | 0.43 | 2.27  | 3.01 | 0.05 |
| E1 | GY   | 7B | AX.89636284 | 7.09E+08 | 0.43 | 2.38  | 3.27 | 0.06 |
| E1 | GY   | 7B | AX.89636284 | 7.09E+08 | 0.43 | 2.38  | 3.27 | 0.06 |
| E1 | GY   | 7B | AX.89711907 | 7.24E+08 | 0.20 | -3.10 | 3.51 | 0.05 |
| E1 | GY   | 7B | AX.89402723 | 5.95E+08 | 0.13 | -3.61 | 3.35 | 0.06 |

|    |      |    |             |          |      |        |      |      |
|----|------|----|-------------|----------|------|--------|------|------|
| E1 | GY   | 7B | AX.89507123 | 7.14E+08 | 0.46 | -2.36  | 3.25 | 0.05 |
| E1 | GY   | 7B | AX.89355748 | 4.90E+06 | 0.20 | -2.83  | 3.01 | 0.05 |
| E1 | GY   | 7B | AX.89638464 | 7.13E+08 | 0.43 | -2.38  | 3.26 | 0.05 |
| E1 | GY   | 7B | AX.89638464 | 7.13E+08 | 0.43 | -2.38  | 3.26 | 0.05 |
| E1 | GY   | 7B | AX.89532964 | 7.18E+08 | 0.37 | -2.35  | 3.08 | 0.05 |
| E1 | GY   | 7B | AX.89532964 | 7.18E+08 | 0.37 | -2.35  | 3.08 | 0.05 |
| E1 | GY   | 7B | AX.89749617 | 7.09E+08 | 0.43 | 2.38   | 3.27 | 0.06 |
| E1 | GY   | 7B | AX.89580565 | 7.09E+08 | 0.43 | 2.32   | 3.13 | 0.06 |
| E1 | GY   | 7B | AX.89463761 | 7.09E+08 | 0.44 | 2.48   | 3.53 | 0.07 |
| E1 | GY   | 7B | AX.89618270 | 4.40E+06 | 0.20 | -2.83  | 3.01 | 0.05 |
| E1 | GY   | 7B | AX.89442633 | 7.22E+08 | 0.20 | -3.24  | 3.79 | 0.06 |
| E1 | GY   | 7B | AX.89500899 | 7.22E+08 | 0.28 | -2.74  | 3.55 | 0.05 |
| E1 | GY   | 7B | AX.89348599 | 1.11E+08 | 0.15 | -3.85  | 4.34 | 0.07 |
| E1 | GY   | 7B | AX.89567542 | 2.43E+07 | 0.06 | -5.02  | 3.15 | 0.06 |
| E1 | GY   | 7B | AX.89397065 | 7.09E+08 | 0.43 | 2.32   | 3.13 | 0.06 |
| E1 | GY   | 7B | AX.89385605 | 7.24E+08 | 0.20 | -3.10  | 3.51 | 0.05 |
| E1 | GY   | 7B | AX.89621133 | 7.09E+08 | 0.34 | -2.64  | 3.63 | 0.06 |
| E1 | GY   | 7B | AX.89621133 | 7.09E+08 | 0.34 | -2.64  | 3.63 | 0.06 |
| E1 | GY   | 7B | AX.89375018 | 7.14E+08 | 0.44 | -2.47  | 3.49 | 0.06 |
| E1 | GY   | 7B | AX.89503859 | 3.39E+07 | 0.08 | -4.35  | 3.25 | 0.06 |
| E1 | GY   | 7B | AX.89433973 | 3.40E+07 | 0.08 | -4.35  | 3.25 | 0.06 |
| E1 | GY   | 7B | AX.89433973 | 3.40E+07 | 0.08 | -4.35  | 3.25 | 0.06 |
| E1 | GY   | 7B | AX.89755027 | 7.18E+08 | 0.25 | -2.85  | 3.51 | 0.05 |
| E1 | GY   | 7B | AX.89633557 | 7.14E+08 | 0.44 | -2.35  | 3.22 | 0.05 |
| E1 | GY   | 7B | AX.89744299 | 4.90E+06 | 0.20 | -2.83  | 3.01 | 0.05 |
| E1 | GY   | 7B | AX.89646228 | 7.13E+08 | 0.44 | -2.47  | 3.49 | 0.06 |
| E1 | GY   | 7B | AX.89529191 | 4.90E+06 | 0.20 | -2.83  | 3.01 | 0.05 |
| E1 | GY   | 7B | AX.89529191 | 4.90E+06 | 0.20 | -2.83  | 3.01 | 0.05 |
| E1 | SPM2 | 7B | AX.89389706 | 6.08E+07 | 0.05 | 36.94  | 3.04 | 0.05 |
| E1 | GY   | 7B | AX.89610838 | 7.09E+08 | 0.43 | 2.38   | 3.27 | 0.06 |
| E1 | GY   | 7B | AX.89365162 | 7.23E+08 | 0.20 | -3.10  | 3.51 | 0.05 |
| E1 | GY   | 7B | AX.89389066 | 7.24E+08 | 0.20 | -3.09  | 3.55 | 0.05 |
| E1 | GY   | 7B | AX.89734790 | 3.39E+07 | 0.08 | -4.35  | 3.25 | 0.06 |
| E1 | GY   | 7B | AX.89732305 | 7.22E+08 | 0.28 | -2.74  | 3.55 | 0.05 |
| E1 | GY   | 7B | AX.89355748 | 4.90E+06 | 0.20 | -2.83  | 3.01 | 0.05 |
| E1 | GY   | 7B | AX.89656107 | 7.22E+08 | 0.28 | -2.74  | 3.55 | 0.05 |
| E1 | GY   | 7B | AX.89677410 | 5.95E+08 | 0.14 | -3.20  | 3.01 | 0.05 |
| E1 | GY   | 7B | AX.89653289 | 7.11E+08 | 0.34 | -2.38  | 3.06 | 0.06 |
| E1 | SPM2 | 7B | AX.89398674 | 6.43E+05 | 0.38 | -17.89 | 3.38 | 0.06 |
| E1 | GY   | 7B | AX.89431025 | 7.14E+08 | 0.49 | -2.73  | 4.21 | 0.07 |
| E1 | GY   | 7B | AX.89500899 | 7.22E+08 | 0.28 | -2.74  | 3.55 | 0.05 |
| E1 | GPS  | 7B | AX.89516048 | 1.45E+08 | 0.19 | -1.41  | 3.07 | 0.05 |
| E1 | GY   | 7B | AX.89555322 | 7.09E+08 | 0.43 | 2.38   | 3.27 | 0.06 |
| E1 | GY   | 7B | AX.89432264 | 3.39E+07 | 0.08 | -4.25  | 3.27 | 0.06 |
| E1 | SPM2 | 7B | AX.89540727 | 7.10E+08 | 0.30 | -18.70 | 3.33 | 0.06 |
| E1 | GY   | 7B | AX.89694858 | 3.40E+07 | 0.08 | -4.35  | 3.25 | 0.06 |
| E1 | GY   | 7B | AX.89694858 | 3.40E+07 | 0.08 | -4.35  | 3.25 | 0.06 |
| E1 | GY   | 7B | AX.89375018 | 7.14E+08 | 0.44 | -2.47  | 3.49 | 0.06 |
| E1 | GY   | 7B | AX.89622108 | 3.39E+07 | 0.08 | -4.35  | 3.25 | 0.06 |
| E1 | GY   | 7B | AX.89622108 | 3.39E+07 | 0.08 | -4.35  | 3.25 | 0.06 |

|    |      |    |             |          |      |          |      |      |
|----|------|----|-------------|----------|------|----------|------|------|
| E1 | GPS  | 7B | AX.89337128 | 1.46E+08 | 0.19 | -1.41    | 3.07 | 0.05 |
| E1 | GY   | 7B | AX.89505290 | 7.14E+08 | 0.49 | -2.66    | 4.04 | 0.07 |
| E1 | GY   | 7B | AX.89611802 | 7.24E+08 | 0.20 | -3.08    | 3.59 | 0.05 |
| E1 | GY   | 7B | AX.89518585 | 7.24E+08 | 0.18 | -2.97    | 3.06 | 0.04 |
| E1 | GY   | 7B | AX.89631359 | 7.09E+08 | 0.43 | 2.27     | 3.01 | 0.05 |
| E1 | GY   | 7B | AX.89713490 | 7.09E+08 | 0.11 | -4.11    | 3.72 | 0.07 |
| E1 | GY   | 7B | AX.89687662 | 4.90E+06 | 0.20 | -2.83    | 3.01 | 0.05 |
| E1 | GY   | 7B | AX.89542111 | 7.22E+08 | 0.20 | -3.10    | 3.51 | 0.05 |
| E1 | GPS  | 7B | AX.89548310 | 6.31E+07 | 0.06 | -2.40    | 3.04 | 0.05 |
| E1 | GY   | 7B | AX.89651495 | 6.11E+08 | 0.08 | -4.79    | 4.01 | 0.06 |
| E1 | GY   | 7B | AX.89489151 | 3.39E+07 | 0.08 | -4.35    | 3.25 | 0.06 |
| E1 | GY   | 7B | AX.89489151 | 3.39E+07 | 0.08 | -4.35    | 3.25 | 0.06 |
| E1 | GPS  | 7B | AX.89333929 | 6.31E+07 | 0.06 | -2.40    | 3.04 | 0.05 |
| E1 | GY   | 7B | AX.89629742 | 7.09E+08 | 0.43 | 2.38     | 3.27 | 0.06 |
| E1 | GY   | 7B | AX.89594740 | 6.11E+08 | 0.08 | -4.79    | 4.01 | 0.06 |
| E1 | GY   | 7B | AX.89373466 | 3.38E+07 | 0.09 | -4.14    | 3.26 | 0.06 |
| E1 | GY   | 7B | AX.89385605 | 7.24E+08 | 0.20 | -3.10    | 3.51 | 0.05 |
| E1 | GY   | 7B | AX.89732098 | 7.22E+08 | 0.28 | -2.73    | 3.50 | 0.05 |
| E1 | GY   | 7B | AX.89493054 | 7.13E+08 | 0.44 | -2.47    | 3.49 | 0.06 |
| E1 | GY   | 7B | AX.89519751 | 3.39E+07 | 0.07 | -4.89    | 3.79 | 0.07 |
| E1 | GY   | 7B | AX.89672581 | 6.11E+08 | 0.09 | -4.38    | 3.59 | 0.06 |
| E1 | GY   | 7B | AX.89438204 | 3.39E+07 | 0.08 | -4.35    | 3.25 | 0.06 |
| E1 | GY   | 7B | AX.89675811 | 3.38E+07 | 0.09 | -4.02    | 3.22 | 0.06 |
| E1 | GY   | 7B | AX.89675811 | 3.38E+07 | 0.09 | -4.02    | 3.22 | 0.06 |
| E1 | GY   | 7B | AX.89618270 | 4.40E+06 | 0.20 | -2.83    | 3.01 | 0.05 |
| E1 | GY   | 7B | AX.89348599 | 1.11E+08 | 0.15 | -3.85    | 4.34 | 0.07 |
| E1 | GY   | 7B | AX.89744030 | 7.09E+08 | 0.43 | 2.38     | 3.27 | 0.06 |
| E1 | GY   | 7B | AX.89422790 | 7.09E+08 | 0.46 | 2.55     | 3.73 | 0.07 |
| E1 | GY   | 7B | AX.89539917 | 7.23E+08 | 0.18 | -3.05    | 3.21 | 0.05 |
| E1 | GY   | 7B | AX.89505290 | 7.14E+08 | 0.49 | -2.66    | 4.04 | 0.07 |
| E1 | GY   | 7B | AX.89611802 | 7.24E+08 | 0.20 | -3.08    | 3.59 | 0.05 |
| E1 | GPM2 | 7B | AX.89438204 | 3.39E+07 | 0.08 | -1079.90 | 3.09 | 0.05 |
| E1 | GY   | 7B | AX.89507637 | 4.90E+06 | 0.20 | -2.83    | 3.01 | 0.05 |
| E1 | GY   | 7B | AX.89507637 | 4.90E+06 | 0.20 | -2.83    | 3.01 | 0.05 |
| E1 | GPM2 | 7B | AX.89567542 | 2.43E+07 | 0.06 | -1446.14 | 3.86 | 0.07 |
| E1 | GPM2 | 7B | AX.89503859 | 3.39E+07 | 0.08 | -1079.90 | 3.09 | 0.05 |
| E1 | GY   | 7B | AX.89677410 | 5.95E+08 | 0.14 | -3.20    | 3.01 | 0.05 |
| E1 | GPM2 | 7B | AX.89455659 | 6.78E+07 | 0.07 | -1399.10 | 4.13 | 0.07 |
| E1 | GY   | 7B | AX.89607120 | 7.09E+08 | 0.19 | -3.24    | 3.67 | 0.06 |
| E1 | GY   | 7B | AX.89607120 | 7.09E+08 | 0.19 | -3.24    | 3.67 | 0.06 |
| E1 | GY   | 7B | AX.89431025 | 7.14E+08 | 0.49 | -2.73    | 4.21 | 0.07 |
| E1 | GPM2 | 7B | AX.89400804 | 7.13E+08 | 0.20 | 726.36   | 3.03 | 0.05 |
| E1 | GPM2 | 7B | AX.89628690 | 3.39E+07 | 0.07 | -1105.99 | 3.07 | 0.05 |
| E1 | GY   | 7B | AX.89555322 | 7.09E+08 | 0.43 | 2.38     | 3.27 | 0.06 |
| E1 | GPM2 | 7B | AX.89489151 | 3.39E+07 | 0.08 | -1079.90 | 3.09 | 0.05 |
| E1 | GPM2 | 7B | AX.89656107 | 7.22E+08 | 0.28 | -641.29  | 3.05 | 0.05 |
| E1 | GY   | 7B | AX.89631359 | 7.09E+08 | 0.43 | 2.27     | 3.01 | 0.05 |
| E1 | GY   | 7B | AX.89439206 | 7.09E+08 | 0.29 | -2.57    | 3.21 | 0.05 |
| E1 | GPM2 | 7B | AX.89431025 | 7.14E+08 | 0.49 | -612.31  | 3.36 | 0.05 |
| E1 | GY   | 7B | AX.89542111 | 7.22E+08 | 0.20 | -3.10    | 3.51 | 0.05 |

|    |      |    |             |          |      |          |      |      |
|----|------|----|-------------|----------|------|----------|------|------|
| E1 | GPM2 | 7B | AX.89422790 | 7.09E+08 | 0.46 | 604.11   | 3.26 | 0.06 |
| E1 | GPM2 | 7B | AX.89653289 | 7.11E+08 | 0.34 | -642.87  | 3.35 | 0.06 |
| E1 | GY   | 7B | AX.89496578 | 4.89E+06 | 0.20 | -2.83    | 3.01 | 0.05 |
| E1 | GPS  | 7B | AX.89603869 | 6.30E+07 | 0.06 | -2.40    | 3.04 | 0.05 |
| E1 | GPM2 | 7B | AX.89739191 | 7.11E+08 | 0.27 | -703.18  | 3.47 | 0.07 |
| E1 | GY   | 7B | AX.89567542 | 2.43E+07 | 0.06 | -5.02    | 3.15 | 0.06 |
| E1 | GY   | 7B | AX.89604264 | 6.11E+08 | 0.09 | -4.69    | 4.03 | 0.06 |
| E1 | GPM2 | 7B | AX.89614268 | 7.13E+08 | 0.17 | 763.96   | 3.03 | 0.05 |
| E1 | GPM2 | 7B | AX.89439688 | 3.18E+07 | 0.05 | -1372.55 | 3.05 | 0.06 |
| E1 | GY   | 7B | AX.89493054 | 7.13E+08 | 0.44 | -2.47    | 3.49 | 0.06 |
| E1 | GY   | 7B | AX.89519751 | 3.39E+07 | 0.07 | -4.89    | 3.79 | 0.07 |
| E1 | GPM2 | 7B | AX.89721401 | 3.40E+07 | 0.08 | -1079.90 | 3.09 | 0.05 |
| E1 | GY   | 7B | AX.89672581 | 6.11E+08 | 0.09 | -4.38    | 3.59 | 0.06 |
| E1 | GPM2 | 7B | AX.89519751 | 3.39E+07 | 0.07 | -1165.63 | 3.36 | 0.06 |
| E1 | GPM2 | 7B | AX.89501087 | 7.10E+08 | 0.27 | -682.45  | 3.27 | 0.06 |
| E1 | GPM2 | 7B | AX.89463325 | 6.07E+08 | 0.35 | -611.54  | 3.11 | 0.06 |
| E1 | GY   | 7B | AX.89711907 | 7.24E+08 | 0.20 | -3.10    | 3.51 | 0.05 |
| E1 | GY   | 7B | AX.89507123 | 7.14E+08 | 0.46 | -2.36    | 3.25 | 0.05 |
| E1 | GY   | 7B | AX.89749617 | 7.09E+08 | 0.43 | 2.38     | 3.27 | 0.06 |
| E1 | GY   | 7B | AX.89580565 | 7.09E+08 | 0.43 | 2.32     | 3.13 | 0.06 |
| E1 | GY   | 7B | AX.89755027 | 7.18E+08 | 0.25 | -2.85    | 3.51 | 0.05 |
| E1 | GY   | 7B | AX.89646228 | 7.13E+08 | 0.44 | -2.47    | 3.49 | 0.06 |
| E1 | GPM2 | 7B | AX.89505290 | 7.14E+08 | 0.49 | -591.90  | 3.17 | 0.05 |
| E1 | GPM2 | 7B | AX.89734790 | 3.39E+07 | 0.08 | -1079.90 | 3.09 | 0.05 |
| E1 | GPM2 | 7B | AX.89433973 | 3.40E+07 | 0.08 | -1079.90 | 3.09 | 0.05 |
| E1 | GY   | 7B | AX.89656107 | 7.22E+08 | 0.28 | -2.74    | 3.55 | 0.05 |
| E1 | GPM2 | 7B | AX.89524406 | 7.10E+08 | 0.27 | -682.45  | 3.27 | 0.06 |
| E1 | GPM2 | 7B | AX.89368338 | 7.10E+08 | 0.32 | -679.92  | 3.57 | 0.07 |
| E1 | GPM2 | 7B | AX.89535574 | 7.09E+08 | 0.15 | -955.49  | 4.03 | 0.07 |
| E1 | GPM2 | 7B | AX.89450411 | 7.11E+08 | 0.34 | -641.16  | 3.31 | 0.06 |
| E1 | GPM2 | 7B | AX.89622108 | 3.39E+07 | 0.08 | -1079.90 | 3.09 | 0.05 |
| E1 | GY   | 7B | AX.89668000 | 4.90E+06 | 0.20 | -2.83    | 3.01 | 0.05 |
| E1 | GY   | 7B | AX.89668000 | 4.90E+06 | 0.20 | -2.83    | 3.01 | 0.05 |
| E1 | GY   | 7B | AX.89432264 | 3.39E+07 | 0.08 | -4.25    | 3.27 | 0.06 |
| E1 | GPM2 | 7B | AX.89422825 | 6.02E+08 | 0.32 | 760.93   | 4.35 | 0.08 |
| E1 | GPM2 | 7B | AX.89413520 | 7.10E+08 | 0.27 | -682.45  | 3.27 | 0.06 |
| E1 | GPM2 | 7B | AX.89542430 | 7.13E+08 | 0.26 | 698.55   | 3.33 | 0.06 |
| E1 | GPM2 | 7B | AX.89713490 | 7.09E+08 | 0.11 | -1025.95 | 3.57 | 0.06 |
| E1 | GPM2 | 7B | AX.89568763 | 7.13E+08 | 0.17 | 763.96   | 3.03 | 0.05 |
| E1 | GPM2 | 7B | AX.89694858 | 3.40E+07 | 0.08 | -1079.90 | 3.09 | 0.05 |
| E1 | GPM2 | 7B | AX.89456148 | 7.11E+08 | 0.27 | -682.45  | 3.27 | 0.06 |
| E1 | GY   | 7B | AX.89732305 | 7.22E+08 | 0.28 | -2.74    | 3.55 | 0.05 |
| E1 | GPM2 | 7B | AX.89489457 | 7.10E+08 | 0.27 | -682.45  | 3.27 | 0.06 |
| E1 | GPM2 | 7B | AX.89442811 | 7.10E+08 | 0.26 | -740.93  | 3.73 | 0.07 |
| E1 | GPM2 | 7B | AX.89376058 | 7.09E+08 | 0.40 | 586.38   | 3.01 | 0.05 |
| E1 | TKW  | 7B | AX.89333426 | 1.11E+08 | 0.11 | -1.45    | 3.46 | 0.06 |
| E1 | TKW  | 7B | AX.89312200 | 6.42E+08 | 0.12 | -1.30    | 3.03 | 0.05 |
| E1 | GPM2 | 7B | AX.89692589 | 7.10E+08 | 0.27 | -682.45  | 3.27 | 0.06 |
| E1 | GY   | 7B | AX.89422448 | 7.11E+08 | 0.34 | -2.49    | 3.28 | 0.06 |
| E1 | TKW  | 7B | AX.89601766 | 6.42E+08 | 0.12 | -1.30    | 3.03 | 0.05 |



|    |      |    |             |          |      |          |      |      |
|----|------|----|-------------|----------|------|----------|------|------|
| E1 | GY   | 7B | AX.89721401 | 3.40E+07 | 0.08 | -4.35    | 3.25 | 0.06 |
| E1 | GPM2 | 7B | AX.89732305 | 7.22E+08 | 0.28 | -641.29  | 3.05 | 0.05 |
| E1 | TKW  | 7B | AX.89352844 | 6.42E+08 | 0.12 | -1.30    | 3.03 | 0.05 |
| E1 | GPM2 | 7B | AX.89684378 | 7.11E+08 | 0.27 | -682.45  | 3.27 | 0.06 |
| E1 | GPM2 | 7B | AX.89692354 | 7.11E+08 | 0.27 | -682.45  | 3.27 | 0.06 |
| E1 | TKW  | 7B | AX.89479069 | 6.42E+08 | 0.12 | -1.30    | 3.03 | 0.05 |
| E1 | TKW  | 7B | AX.89481912 | 4.49E+07 | 0.07 | -1.64    | 3.07 | 0.05 |
| E1 | TKW  | 7B | AX.89357125 | 6.42E+08 | 0.12 | -1.30    | 3.03 | 0.05 |
| E1 | GY   | 7B | AX.89439281 | 4.32E+06 | 0.20 | -2.83    | 3.01 | 0.05 |
| E1 | GPM2 | 7B | AX.89344849 | 7.22E+08 | 0.28 | -641.29  | 3.05 | 0.05 |
| E1 | TKW  | 7B | AX.89333210 | 6.42E+08 | 0.12 | -1.30    | 3.14 | 0.05 |
| E1 | TKW  | 7B | AX.89575426 | 6.43E+08 | 0.12 | -1.30    | 3.03 | 0.05 |
| E1 | TKW  | 7B | AX.89513518 | 6.43E+08 | 0.11 | -1.43    | 3.49 | 0.06 |
| E1 | TKW  | 7B | AX.89462633 | 5.94E+08 | 0.05 | -1.89    | 3.04 | 0.05 |
| E1 | TKW  | 7B | AX.89466097 | 6.43E+08 | 0.12 | -1.30    | 3.03 | 0.05 |
| E1 | TKW  | 7B | AX.89540157 | 6.43E+08 | 0.13 | -1.33    | 3.54 | 0.06 |
| E1 | TKW  | 7B | AX.89667167 | 6.43E+08 | 0.12 | -1.34    | 3.29 | 0.05 |
| E1 | TKW  | 7B | AX.89468928 | 6.42E+08 | 0.12 | -1.30    | 3.03 | 0.05 |
| E1 | TKW  | 7B | AX.89472431 | 6.43E+08 | 0.12 | -1.30    | 3.03 | 0.05 |
| E1 | GPM2 | 7B | AX.89541447 | 6.78E+07 | 0.07 | -1399.10 | 4.13 | 0.07 |
| E1 | GPM2 | 7B | AX.89532644 | 7.18E+08 | 0.07 | 1452.43  | 4.41 | 0.08 |
| E1 | TKW  | 7B | AX.89497058 | 6.43E+08 | 0.13 | -1.33    | 3.54 | 0.06 |
| E1 | TKW  | 7B | AX.89436577 | 6.43E+08 | 0.12 | -1.30    | 3.03 | 0.05 |
| E1 | GPM2 | 7B | AX.89422448 | 7.11E+08 | 0.34 | -664.57  | 3.52 | 0.07 |
| E1 | TKW  | 7B | AX.89667248 | 6.43E+08 | 0.12 | -1.30    | 3.03 | 0.05 |
| E1 | TKW  | 7B | AX.89731988 | 5.94E+08 | 0.05 | -1.89    | 3.04 | 0.05 |
| E1 | TKW  | 7B | AX.89551431 | 6.43E+08 | 0.11 | -1.43    | 3.49 | 0.06 |
| E1 | TKW  | 7B | AX.89712015 | 6.43E+08 | 0.12 | -1.30    | 3.03 | 0.05 |
| E1 | TKW  | 7B | AX.89354142 | 6.43E+08 | 0.13 | -1.33    | 3.54 | 0.06 |
| E1 | TKW  | 7B | AX.89654737 | 6.42E+08 | 0.12 | -1.30    | 3.03 | 0.05 |
| E1 | TKW  | 7B | AX.89736925 | 6.43E+08 | 0.13 | -1.33    | 3.35 | 0.06 |
| E1 | TKW  | 7B | AX.89705146 | 6.42E+08 | 0.12 | -1.30    | 3.03 | 0.05 |
| E1 | TKW  | 7B | AX.89473885 | 6.43E+08 | 0.12 | -1.30    | 3.03 | 0.05 |
| E1 | TKW  | 7B | AX.89545842 | 6.43E+08 | 0.12 | -1.30    | 3.03 | 0.05 |
| E2 | GY   | 7B | AX.89399705 | 1.24E+08 | 0.20 | -2.79    | 4.06 | 0.10 |
| E2 | GY   | 7B | AX.89476659 | 1.33E+08 | 0.19 | -2.71    | 3.76 | 0.07 |
| E2 | GY   | 7B | AX.89329065 | 1.26E+08 | 0.21 | -2.34    | 3.12 | 0.08 |
| E2 | GY   | 7B | AX.89573863 | 1.34E+08 | 0.22 | -2.45    | 3.52 | 0.09 |
| E2 | GY   | 7B | AX.89721479 | 1.24E+08 | 0.20 | -2.39    | 3.12 | 0.07 |
| E2 | GY   | 7B | AX.89610890 | 1.25E+08 | 0.20 | -2.80    | 4.13 | 0.10 |
| E2 | GY   | 7B | AX.89352521 | 3.31E+07 | 0.28 | -2.10    | 3.04 | 0.05 |
| E2 | GY   | 7B | AX.89435587 | 5.91E+07 | 0.06 | -4.22    | 3.18 | 0.04 |
| E2 | SPM2 | 7B | AX.89715777 | 6.41E+08 | 0.07 | 25.80    | 3.53 | 0.06 |
| E2 | GY   | 7B | AX.89401143 | 1.24E+08 | 0.20 | -2.79    | 4.06 | 0.10 |
| E2 | GY   | 7B | AX.89330300 | 1.24E+08 | 0.22 | -2.49    | 3.56 | 0.08 |
| E2 | GY   | 7B | AX.89436335 | 1.34E+08 | 0.22 | -2.45    | 3.52 | 0.09 |
| E2 | GY   | 7B | AX.89436335 | 1.34E+08 | 0.22 | -2.45    | 3.52 | 0.09 |
| E2 | GY   | 7B | AX.89354117 | 1.25E+08 | 0.20 | -2.80    | 4.13 | 0.10 |
| E2 | GY   | 7B | AX.89724012 | 1.25E+08 | 0.20 | -2.69    | 3.85 | 0.09 |
| E2 | GY   | 7B | AX.89590117 | 1.24E+08 | 0.20 | -2.79    | 4.06 | 0.10 |

|    |      |    |             |          |      |       |      |      |
|----|------|----|-------------|----------|------|-------|------|------|
| E2 | GY   | 7B | AX.89577587 | 1.33E+08 | 0.25 | -2.21 | 3.12 | 0.08 |
| E2 | GY   | 7B | AX.89332784 | 1.25E+08 | 0.20 | -2.44 | 3.22 | 0.08 |
| E2 | SPM2 | 7B | AX.89618651 | 6.76E+08 | 0.25 | 15.87 | 4.05 | 0.07 |
| E2 | GY   | 7B | AX.89439688 | 3.18E+07 | 0.05 | -4.77 | 3.39 | 0.08 |
| E2 | GY   | 7B | AX.89312842 | 1.24E+08 | 0.20 | -2.38 | 3.04 | 0.07 |
| E2 | GY   | 7B | AX.89653266 | 1.27E+08 | 0.21 | -2.45 | 3.36 | 0.09 |
| E2 | GY   | 7B | AX.89546755 | 7.20E+08 | 0.06 | -4.64 | 3.76 | 0.04 |
| E2 | GY   | 7B | AX.89337128 | 1.46E+08 | 0.19 | -2.40 | 3.05 | 0.04 |
| E2 | GY   | 7B | AX.89409124 | 1.24E+08 | 0.20 | -2.79 | 4.06 | 0.10 |
| E2 | GY   | 7B | AX.89409124 | 1.24E+08 | 0.20 | -2.79 | 4.06 | 0.10 |
| E2 | GY   | 7B | AX.89548327 | 1.25E+08 | 0.20 | -2.44 | 3.22 | 0.08 |
| E2 | GY   | 7B | AX.89548540 | 1.24E+08 | 0.20 | -2.79 | 4.06 | 0.10 |
| E2 | GY   | 7B | AX.89572322 | 1.25E+08 | 0.20 | -2.80 | 4.13 | 0.10 |
| E2 | SPM2 | 7B | AX.89739917 | 1.12E+08 | 0.10 | 19.73 | 3.07 | 0.05 |
| E2 | GPS  | 7B | AX.89385605 | 7.24E+08 | 0.20 | -1.68 | 3.10 | 0.05 |
| E2 | GY   | 7B | AX.89329116 | 1.25E+08 | 0.20 | -2.46 | 3.30 | 0.08 |
| E2 | GY   | 7B | AX.89329116 | 1.25E+08 | 0.20 | -2.46 | 3.30 | 0.08 |
| E2 | GY   | 7B | AX.89732724 | 1.28E+08 | 0.19 | -2.50 | 3.31 | 0.09 |
| E2 | GY   | 7B | AX.89732724 | 1.28E+08 | 0.19 | -2.50 | 3.31 | 0.09 |
| E2 | GY   | 7B | AX.89517643 | 1.25E+08 | 0.20 | -2.80 | 4.13 | 0.10 |
| E2 | GY   | 7B | AX.89517643 | 1.25E+08 | 0.20 | -2.80 | 4.13 | 0.10 |
| E2 | GY   | 7B | AX.89752544 | 1.25E+08 | 0.20 | -2.58 | 3.58 | 0.09 |
| E2 | GY   | 7B | AX.89737247 | 1.25E+08 | 0.20 | -2.80 | 4.13 | 0.10 |
| E2 | GY   | 7B | AX.89737247 | 1.25E+08 | 0.20 | -2.80 | 4.13 | 0.10 |
| E2 | GY   | 7B | AX.89531537 | 1.25E+08 | 0.20 | -2.59 | 3.55 | 0.09 |
| E2 | GY   | 7B | AX.89341648 | 1.27E+08 | 0.21 | -2.30 | 3.02 | 0.08 |
| E2 | GY   | 7B | AX.89341648 | 1.27E+08 | 0.21 | -2.30 | 3.02 | 0.08 |
| E2 | GY   | 7B | AX.89377678 | 1.55E+07 | 0.05 | -5.62 | 4.75 | 0.07 |
| E2 | GY   | 7B | AX.89377678 | 1.55E+07 | 0.05 | -5.62 | 4.75 | 0.07 |
| E2 | GY   | 7B | AX.89519392 | 1.25E+08 | 0.20 | -2.44 | 3.22 | 0.08 |
| E2 | GY   | 7B | AX.89519392 | 1.25E+08 | 0.20 | -2.44 | 3.22 | 0.08 |
| E2 | GY   | 7B | AX.86184396 | 1.25E+08 | 0.20 | -2.97 | 4.52 | 0.11 |
| E2 | GY   | 7B | AX.86184396 | 1.25E+08 | 0.20 | -2.97 | 4.52 | 0.11 |
| E2 | GY   | 7B | AX.89699057 | 1.34E+08 | 0.22 | -2.45 | 3.52 | 0.09 |
| E2 | GY   | 7B | AX.89699057 | 1.34E+08 | 0.22 | -2.45 | 3.52 | 0.09 |
| E2 | GY   | 7B | AX.86184465 | 1.24E+08 | 0.20 | -2.79 | 4.06 | 0.10 |
| E2 | GY   | 7B | AX.86184465 | 1.24E+08 | 0.20 | -2.79 | 4.06 | 0.10 |
| E2 | GY   | 7B | AX.89587390 | 1.33E+08 | 0.25 | -2.23 | 3.20 | 0.08 |
| E2 | GY   | 7B | AX.89366909 | 1.25E+08 | 0.20 | -2.44 | 3.22 | 0.08 |
| E2 | GY   | 7B | AX.89366909 | 1.25E+08 | 0.20 | -2.44 | 3.22 | 0.08 |
| E2 | GY   | 7B | AX.89390140 | 1.24E+08 | 0.20 | -2.79 | 4.06 | 0.10 |
| E2 | GY   | 7B | AX.89520075 | 3.39E+07 | 0.09 | -3.78 | 3.85 | 0.07 |
| E2 | GY   | 7B | AX.89520075 | 3.39E+07 | 0.09 | -3.78 | 3.85 | 0.07 |
| E2 | GY   | 7B | AX.89590117 | 1.24E+08 | 0.20 | -2.79 | 4.06 | 0.10 |
| E2 | GPS  | 7B | AX.89602085 | 5.50E+06 | 0.08 | -2.40 | 3.09 | 0.05 |
| E2 | GY   | 7B | AX.89736611 | 1.25E+08 | 0.20 | -2.80 | 4.13 | 0.10 |
| E2 | GY   | 7B | AX.89736611 | 1.25E+08 | 0.20 | -2.80 | 4.13 | 0.10 |
| E2 | GY   | 7B | AX.89310532 | 1.34E+08 | 0.22 | -2.45 | 3.52 | 0.09 |
| E2 | GY   | 7B | AX.89310532 | 1.34E+08 | 0.22 | -2.45 | 3.52 | 0.09 |
| E2 | GY   | 7B | AX.89508992 | 1.43E+08 | 0.26 | -2.23 | 3.24 | 0.08 |

|    |     |    |             |          |      |       |      |      |
|----|-----|----|-------------|----------|------|-------|------|------|
| E2 | GY  | 7B | AX.89508992 | 1.43E+08 | 0.26 | -2.23 | 3.24 | 0.08 |
| E2 | GY  | 7B | AX.89450310 | 1.25E+08 | 0.20 | -2.44 | 3.22 | 0.08 |
| E2 | GY  | 7B | AX.89450310 | 1.25E+08 | 0.20 | -2.44 | 3.22 | 0.08 |
| E2 | GY  | 7B | AX.89379822 | 1.34E+08 | 0.25 | -2.21 | 3.12 | 0.08 |
| E2 | GY  | 7B | AX.89379822 | 1.34E+08 | 0.25 | -2.21 | 3.12 | 0.08 |
| E2 | GY  | 7B | AX.89591697 | 1.24E+08 | 0.20 | -2.38 | 3.04 | 0.07 |
| E2 | GY  | 7B | AX.89591697 | 1.24E+08 | 0.20 | -2.38 | 3.04 | 0.07 |
| E2 | GY  | 7B | AX.89567542 | 2.43E+07 | 0.06 | -5.18 | 4.54 | 0.09 |
| E2 | GY  | 7B | AX.89439563 | 1.24E+08 | 0.20 | -2.79 | 4.06 | 0.10 |
| E2 | GY  | 7B | AX.89439563 | 1.24E+08 | 0.20 | -2.79 | 4.06 | 0.10 |
| E2 | GY  | 7B | AX.89474156 | 1.34E+08 | 0.25 | -2.21 | 3.12 | 0.08 |
| E2 | GY  | 7B | AX.89474156 | 1.34E+08 | 0.25 | -2.21 | 3.12 | 0.08 |
| E2 | GY  | 7B | AX.89487687 | 1.34E+08 | 0.25 | -2.21 | 3.12 | 0.08 |
| E2 | GY  | 7B | AX.89487687 | 1.34E+08 | 0.25 | -2.21 | 3.12 | 0.08 |
| E2 | GY  | 7B | AX.89440438 | 1.34E+08 | 0.22 | -2.45 | 3.47 | 0.09 |
| E2 | GY  | 7B | AX.89440438 | 1.34E+08 | 0.22 | -2.45 | 3.47 | 0.09 |
| E2 | GY  | 7B | AX.89580183 | 1.34E+08 | 0.25 | -2.21 | 3.12 | 0.08 |
| E2 | GY  | 7B | AX.89580183 | 1.34E+08 | 0.25 | -2.21 | 3.12 | 0.08 |
| E2 | GPS | 7B | AX.89631122 | 5.22E+06 | 0.18 | -1.95 | 3.73 | 0.07 |
| E2 | GY  | 7B | AX.89312842 | 1.24E+08 | 0.20 | -2.38 | 3.04 | 0.07 |
| E2 | GY  | 7B | AX.89370690 | 1.24E+08 | 0.20 | -2.79 | 4.06 | 0.10 |
| E2 | GY  | 7B | AX.89370690 | 1.24E+08 | 0.20 | -2.79 | 4.06 | 0.10 |
| E2 | GY  | 7B | AX.89620932 | 1.25E+08 | 0.20 | -2.44 | 3.22 | 0.08 |
| E2 | GY  | 7B | AX.89452470 | 1.24E+08 | 0.20 | -2.38 | 3.04 | 0.07 |
| E2 | GY  | 7B | AX.89452470 | 1.24E+08 | 0.20 | -2.38 | 3.04 | 0.07 |
| E2 | GY  | 7B | AX.89546574 | 1.25E+08 | 0.20 | -2.80 | 4.13 | 0.10 |
| E2 | GY  | 7B | AX.89546574 | 1.25E+08 | 0.20 | -2.80 | 4.13 | 0.10 |
| E2 | GY  | 7B | AX.89524726 | 1.25E+08 | 0.20 | -2.80 | 4.13 | 0.10 |
| E2 | GY  | 7B | AX.89524726 | 1.25E+08 | 0.20 | -2.80 | 4.13 | 0.10 |
| E2 | GY  | 7B | AX.89581762 | 1.34E+08 | 0.22 | -2.45 | 3.52 | 0.09 |
| E2 | GY  | 7B | AX.89581762 | 1.34E+08 | 0.22 | -2.45 | 3.52 | 0.09 |
| E2 | GY  | 7B | AX.89525451 | 4.85E+07 | 0.07 | -3.95 | 3.58 | 0.05 |
| E2 | GY  | 7B | AX.89525451 | 4.85E+07 | 0.07 | -3.95 | 3.58 | 0.05 |
| E2 | GY  | 7B | AX.89348537 | 1.35E+08 | 0.26 | -2.24 | 3.24 | 0.08 |
| E2 | GY  | 7B | AX.89348537 | 1.35E+08 | 0.26 | -2.24 | 3.24 | 0.08 |
| E2 | GY  | 7B | AX.89348599 | 1.11E+08 | 0.15 | -3.31 | 4.61 | 0.07 |
| E2 | GY  | 7B | AX.89664539 | 1.25E+08 | 0.20 | -2.80 | 4.13 | 0.10 |
| E2 | GY  | 7B | AX.89664539 | 1.25E+08 | 0.20 | -2.80 | 4.13 | 0.10 |
| E2 | GY  | 7B | AX.89619603 | 1.26E+08 | 0.21 | -2.34 | 3.12 | 0.08 |
| E2 | GY  | 7B | AX.89491054 | 1.34E+08 | 0.24 | -2.30 | 3.26 | 0.08 |
| E2 | GY  | 7B | AX.89491054 | 1.34E+08 | 0.24 | -2.30 | 3.26 | 0.08 |
| E2 | GY  | 7B | AX.89373417 | 1.26E+08 | 0.21 | -2.34 | 3.12 | 0.08 |
| E2 | GY  | 7B | AX.89373417 | 1.26E+08 | 0.21 | -2.34 | 3.12 | 0.08 |
| E2 | GY  | 7B | AX.89631679 | 1.36E+08 | 0.18 | -2.61 | 3.41 | 0.05 |
| E2 | GY  | 7B | AX.89631679 | 1.36E+08 | 0.18 | -2.61 | 3.41 | 0.05 |
| E2 | GY  | 7B | AX.89560711 | 1.34E+08 | 0.23 | -2.46 | 3.60 | 0.09 |
| E2 | GY  | 7B | AX.89560711 | 1.34E+08 | 0.23 | -2.46 | 3.60 | 0.09 |
| E2 | GY  | 7B | AX.89596775 | 1.34E+08 | 0.22 | -2.45 | 3.52 | 0.09 |
| E2 | GY  | 7B | AX.89596775 | 1.34E+08 | 0.22 | -2.45 | 3.52 | 0.09 |
| E2 | GY  | 7B | AX.89669241 | 3.38E+07 | 0.09 | -3.78 | 3.85 | 0.07 |

|    |    |    |             |          |      |       |      |      |
|----|----|----|-------------|----------|------|-------|------|------|
| E2 | GY | 7B | AX.89669241 | 3.38E+07 | 0.09 | -3.78 | 3.85 | 0.07 |
| E2 | GY | 7B | AX.89316726 | 1.34E+08 | 0.25 | -2.21 | 3.12 | 0.08 |
| E2 | GY | 7B | AX.89316726 | 1.34E+08 | 0.25 | -2.21 | 3.12 | 0.08 |
| E2 | GY | 7B | AX.89580035 | 1.25E+08 | 0.19 | -2.54 | 3.39 | 0.08 |
| E2 | GY | 7B | AX.89580035 | 1.25E+08 | 0.19 | -2.54 | 3.39 | 0.08 |
| E2 | GY | 7B | AX.89561410 | 1.25E+08 | 0.20 | -2.59 | 3.55 | 0.09 |
| E2 | GY | 7B | AX.89561410 | 1.25E+08 | 0.20 | -2.59 | 3.55 | 0.09 |
| E2 | GY | 7B | AX.89422101 | 1.25E+08 | 0.20 | -2.44 | 3.22 | 0.08 |
| E2 | GY | 7B | AX.89422101 | 1.25E+08 | 0.20 | -2.44 | 3.22 | 0.08 |
| E2 | GY | 7B | AX.89599341 | 1.25E+08 | 0.20 | -2.80 | 4.13 | 0.10 |
| E2 | GY | 7B | AX.89599341 | 1.25E+08 | 0.20 | -2.80 | 4.13 | 0.10 |
| E2 | GY | 7B | AX.89386589 | 1.34E+08 | 0.22 | -2.45 | 3.52 | 0.09 |
| E2 | GY | 7B | AX.89386589 | 1.34E+08 | 0.22 | -2.45 | 3.52 | 0.09 |
| E2 | GY | 7B | AX.89329065 | 1.26E+08 | 0.21 | -2.34 | 3.12 | 0.08 |
| E2 | GY | 7B | AX.89457197 | 2.58E+06 | 0.05 | -4.52 | 3.04 | 0.07 |
| E2 | GY | 7B | AX.89457197 | 2.58E+06 | 0.05 | -4.52 | 3.04 | 0.07 |
| E2 | GY | 7B | AX.89671906 | 1.35E+08 | 0.17 | -2.61 | 3.31 | 0.06 |
| E2 | GY | 7B | AX.89671906 | 1.35E+08 | 0.17 | -2.61 | 3.31 | 0.06 |
| E2 | GY | 7B | AX.89752544 | 1.25E+08 | 0.20 | -2.58 | 3.58 | 0.09 |
| E2 | GY | 7B | AX.89341213 | 1.25E+08 | 0.20 | -2.80 | 4.13 | 0.10 |
| E2 | GY | 7B | AX.89341213 | 1.25E+08 | 0.20 | -2.80 | 4.13 | 0.10 |
| E2 | GY | 7B | AX.89531537 | 1.25E+08 | 0.20 | -2.59 | 3.55 | 0.09 |
| E2 | GY | 7B | AX.89724261 | 1.25E+08 | 0.20 | -2.41 | 3.14 | 0.08 |
| E2 | GY | 7B | AX.89424182 | 1.28E+08 | 0.18 | -2.48 | 3.13 | 0.08 |
| E2 | GY | 7B | AX.89424182 | 1.28E+08 | 0.18 | -2.48 | 3.13 | 0.08 |
| E2 | GY | 7B | AX.89600751 | 1.25E+08 | 0.20 | -2.44 | 3.22 | 0.08 |
| E2 | GY | 7B | AX.89600751 | 1.25E+08 | 0.20 | -2.44 | 3.22 | 0.08 |
| E2 | GY | 7B | AX.89673439 | 3.39E+07 | 0.09 | -3.78 | 3.85 | 0.07 |
| E2 | GY | 7B | AX.89673439 | 3.39E+07 | 0.09 | -3.78 | 3.85 | 0.07 |
| E2 | GY | 7B | AX.89575968 | 1.55E+07 | 0.05 | -5.62 | 4.75 | 0.07 |
| E2 | GY | 7B | AX.89575968 | 1.55E+07 | 0.05 | -5.62 | 4.75 | 0.07 |
| E2 | GY | 7B | AX.89698438 | 1.25E+08 | 0.20 | -2.80 | 4.13 | 0.10 |
| E2 | GY | 7B | AX.89698438 | 1.25E+08 | 0.20 | -2.80 | 4.13 | 0.10 |
| E2 | GY | 7B | AX.89641180 | 1.25E+08 | 0.20 | -2.80 | 4.13 | 0.10 |
| E2 | GY | 7B | AX.89641180 | 1.25E+08 | 0.20 | -2.80 | 4.13 | 0.10 |
| E2 | GY | 7B | AX.89320399 | 1.34E+08 | 0.22 | -2.45 | 3.52 | 0.09 |
| E2 | GY | 7B | AX.89320399 | 1.34E+08 | 0.22 | -2.45 | 3.52 | 0.09 |
| E2 | GY | 7B | AX.89320512 | 1.34E+08 | 0.22 | -2.45 | 3.52 | 0.09 |
| E2 | GY | 7B | AX.89320512 | 1.34E+08 | 0.22 | -2.45 | 3.52 | 0.09 |
| E2 | GY | 7B | AX.89485021 | 1.24E+08 | 0.20 | -2.79 | 4.06 | 0.10 |
| E2 | GY | 7B | AX.89485021 | 1.24E+08 | 0.20 | -2.79 | 4.06 | 0.10 |
| E2 | GY | 7B | AX.89674367 | 3.38E+07 | 0.09 | -3.78 | 3.85 | 0.07 |
| E2 | GY | 7B | AX.89674367 | 3.38E+07 | 0.09 | -3.78 | 3.85 | 0.07 |
| E2 | GY | 7B | AX.89587390 | 1.33E+08 | 0.25 | -2.23 | 3.20 | 0.08 |
| E2 | GY | 7B | AX.89390140 | 1.24E+08 | 0.20 | -2.79 | 4.06 | 0.10 |
| E2 | GY | 7B | AX.89611605 | 1.24E+08 | 0.20 | -2.79 | 4.06 | 0.10 |
| E2 | GY | 7B | AX.89611605 | 1.24E+08 | 0.20 | -2.79 | 4.06 | 0.10 |
| E2 | GY | 7B | AX.89675811 | 3.38E+07 | 0.09 | -3.63 | 3.74 | 0.07 |
| E2 | GY | 7B | AX.89675811 | 3.38E+07 | 0.09 | -3.63 | 3.74 | 0.07 |
| E2 | GY | 7B | AX.89603705 | 1.33E+08 | 0.22 | -2.45 | 3.52 | 0.09 |

|    |    |    |             |          |      |       |      |      |
|----|----|----|-------------|----------|------|-------|------|------|
| E2 | GY | 7B | AX.89603705 | 1.33E+08 | 0.22 | -2.45 | 3.52 | 0.09 |
| E2 | GY | 7B | AX.89567542 | 2.43E+07 | 0.06 | -5.18 | 4.54 | 0.09 |
| E2 | GY | 7B | AX.89688646 | 1.34E+08 | 0.25 | -2.23 | 3.20 | 0.08 |
| E2 | GY | 7B | AX.89688646 | 1.34E+08 | 0.25 | -2.23 | 3.20 | 0.08 |
| E2 | GY | 7B | AX.89738607 | 1.55E+07 | 0.05 | -5.62 | 4.75 | 0.07 |
| E2 | GY | 7B | AX.89738607 | 1.55E+07 | 0.05 | -5.62 | 4.75 | 0.07 |
| E2 | GY | 7B | AX.89440321 | 1.25E+08 | 0.20 | -2.80 | 4.13 | 0.10 |
| E2 | GY | 7B | AX.89440321 | 1.25E+08 | 0.20 | -2.80 | 4.13 | 0.10 |
| E2 | GY | 7B | AX.89357472 | 1.25E+08 | 0.20 | -2.44 | 3.22 | 0.08 |
| E2 | GY | 7B | AX.89357472 | 1.25E+08 | 0.20 | -2.44 | 3.22 | 0.08 |
| E2 | GY | 7B | AX.89605378 | 1.34E+08 | 0.25 | -2.21 | 3.12 | 0.08 |
| E2 | GY | 7B | AX.89605378 | 1.34E+08 | 0.25 | -2.21 | 3.12 | 0.08 |
| E2 | GY | 7B | AX.89620932 | 1.25E+08 | 0.20 | -2.44 | 3.22 | 0.08 |
| E2 | GY | 7B | AX.89739195 | 1.34E+08 | 0.22 | -2.45 | 3.52 | 0.09 |
| E2 | GY | 7B | AX.89430386 | 1.24E+08 | 0.20 | -2.38 | 3.04 | 0.07 |
| E2 | GY | 7B | AX.89430386 | 1.24E+08 | 0.20 | -2.38 | 3.04 | 0.07 |
| E2 | GY | 7B | AX.89752029 | 1.24E+08 | 0.21 | -2.39 | 3.24 | 0.08 |
| E2 | GY | 7B | AX.89752029 | 1.24E+08 | 0.21 | -2.39 | 3.24 | 0.08 |
| E2 | GY | 7B | AX.89607239 | 1.34E+08 | 0.22 | -2.45 | 3.52 | 0.09 |
| E2 | GY | 7B | AX.89607239 | 1.34E+08 | 0.22 | -2.45 | 3.52 | 0.09 |
| E2 | GY | 7B | AX.89500431 | 1.25E+08 | 0.20 | -2.80 | 4.13 | 0.10 |
| E2 | GY | 7B | AX.89500431 | 1.25E+08 | 0.20 | -2.80 | 4.13 | 0.10 |
| E2 | GY | 7B | AX.89348599 | 1.11E+08 | 0.15 | -3.31 | 4.61 | 0.07 |
| E2 | GY | 7B | AX.89465750 | 1.34E+08 | 0.22 | -2.45 | 3.52 | 0.09 |
| E2 | GY | 7B | AX.89465750 | 1.34E+08 | 0.22 | -2.45 | 3.52 | 0.09 |
| E2 | GY | 7B | AX.89619603 | 1.26E+08 | 0.21 | -2.34 | 3.12 | 0.08 |
| E2 | GY | 7B | AX.89548540 | 1.24E+08 | 0.20 | -2.79 | 4.06 | 0.10 |
| E2 | GY | 7B | AX.89723127 | 1.25E+08 | 0.20 | -2.80 | 4.13 | 0.10 |
| E2 | GY | 7B | AX.89723127 | 1.25E+08 | 0.20 | -2.80 | 4.13 | 0.10 |
| E2 | GY | 7B | AX.89433400 | 1.25E+08 | 0.20 | -2.46 | 3.30 | 0.08 |
| E2 | GY | 7B | AX.89433400 | 1.25E+08 | 0.20 | -2.46 | 3.30 | 0.08 |
| E2 | GY | 7B | AX.89609177 | 1.33E+08 | 0.25 | -2.21 | 3.12 | 0.08 |
| E2 | GY | 7B | AX.89609177 | 1.33E+08 | 0.25 | -2.21 | 3.12 | 0.08 |
| E2 | GY | 7B | AX.89467398 | 1.25E+08 | 0.20 | -2.80 | 4.13 | 0.10 |
| E2 | GY | 7B | AX.89467398 | 1.25E+08 | 0.20 | -2.80 | 4.13 | 0.10 |
| E2 | GY | 7B | AX.89523827 | 1.25E+08 | 0.20 | -2.80 | 4.13 | 0.10 |
| E2 | GY | 7B | AX.89523827 | 1.25E+08 | 0.20 | -2.80 | 4.13 | 0.10 |
| E2 | GY | 7B | AX.89328181 | 1.24E+08 | 0.20 | -2.79 | 4.06 | 0.10 |
| E2 | GY | 7B | AX.89328181 | 1.24E+08 | 0.20 | -2.79 | 4.06 | 0.10 |
| E2 | GY | 7B | AX.89621414 | 9.93E+07 | 0.05 | -4.80 | 3.72 | 0.08 |
| E2 | GY | 7B | AX.89399705 | 1.24E+08 | 0.20 | -2.79 | 4.06 | 0.10 |
| E2 | GY | 7B | AX.89691930 | 1.24E+08 | 0.20 | -2.38 | 3.04 | 0.07 |
| E2 | GY | 7B | AX.89691930 | 1.24E+08 | 0.20 | -2.38 | 3.04 | 0.07 |
| E2 | GY | 7B | AX.89476659 | 1.33E+08 | 0.19 | -2.71 | 3.76 | 0.07 |
| E2 | GY | 7B | AX.89573863 | 1.34E+08 | 0.22 | -2.45 | 3.52 | 0.09 |
| E2 | GY | 7B | AX.89658807 | 1.34E+08 | 0.25 | -2.21 | 3.12 | 0.08 |
| E2 | GY | 7B | AX.89658807 | 1.34E+08 | 0.25 | -2.21 | 3.12 | 0.08 |
| E2 | GY | 7B | AX.89721479 | 1.24E+08 | 0.20 | -2.39 | 3.12 | 0.07 |
| E2 | GY | 7B | AX.89696915 | 1.25E+08 | 0.20 | -2.80 | 4.13 | 0.10 |
| E2 | GY | 7B | AX.89610890 | 1.25E+08 | 0.20 | -2.80 | 4.13 | 0.10 |

|    |     |    |             |          |      |       |      |      |
|----|-----|----|-------------|----------|------|-------|------|------|
| E2 | GY  | 7B | AX.89574468 | 1.26E+08 | 0.21 | -2.34 | 3.12 | 0.08 |
| E2 | GY  | 7B | AX.89352521 | 3.31E+07 | 0.28 | -2.10 | 3.04 | 0.05 |
| E2 | GY  | 7B | AX.89435587 | 5.91E+07 | 0.06 | -4.22 | 3.18 | 0.04 |
| E2 | GY  | 7B | AX.89401143 | 1.24E+08 | 0.20 | -2.79 | 4.06 | 0.10 |
| E2 | GY  | 7B | AX.89330300 | 1.24E+08 | 0.22 | -2.49 | 3.56 | 0.08 |
| E2 | GY  | 7B | AX.89709888 | 1.34E+08 | 0.22 | -2.45 | 3.52 | 0.09 |
| E2 | GY  | 7B | AX.89709888 | 1.34E+08 | 0.22 | -2.45 | 3.52 | 0.09 |
| E2 | GY  | 7B | AX.89470413 | 1.25E+08 | 0.20 | -2.80 | 4.13 | 0.10 |
| E2 | GY  | 7B | AX.89484474 | 1.24E+08 | 0.20 | -2.79 | 4.06 | 0.10 |
| E2 | GY  | 7B | AX.89484474 | 1.24E+08 | 0.20 | -2.79 | 4.06 | 0.10 |
| E2 | TKW | 7B | AX.89565708 | 5.97E+07 | 0.29 | 1.05  | 3.04 | 0.06 |
| E2 | GY  | 7B | AX.89354117 | 1.25E+08 | 0.20 | -2.80 | 4.13 | 0.10 |
| E2 | GY  | 7B | AX.89516048 | 1.45E+08 | 0.19 | -2.40 | 3.05 | 0.04 |
| E2 | GY  | 7B | AX.89516048 | 1.45E+08 | 0.19 | -2.40 | 3.05 | 0.04 |
| E2 | GY  | 7B | AX.89366919 | 1.25E+08 | 0.20 | -2.80 | 4.13 | 0.10 |
| E2 | GY  | 7B | AX.89724012 | 1.25E+08 | 0.20 | -2.69 | 3.85 | 0.09 |
| E2 | GY  | 7B | AX.89577587 | 1.33E+08 | 0.25 | -2.21 | 3.12 | 0.08 |
| E2 | GY  | 7B | AX.89332784 | 1.25E+08 | 0.20 | -2.44 | 3.22 | 0.08 |
| E2 | GPS | 7B | AX.89335596 | 7.01E+08 | 0.32 | 1.58  | 3.67 | 0.06 |
| E2 | GY  | 7B | AX.89380451 | 1.25E+08 | 0.20 | -2.76 | 3.98 | 0.10 |
| E2 | GY  | 7B | AX.89439688 | 3.18E+07 | 0.05 | -4.77 | 3.39 | 0.08 |
| E2 | GY  | 7B | AX.89440767 | 1.25E+08 | 0.20 | -2.80 | 4.13 | 0.10 |
| E2 | GY  | 7B | AX.89593306 | 1.25E+08 | 0.20 | -2.44 | 3.22 | 0.08 |
| E2 | GY  | 7B | AX.89739195 | 1.34E+08 | 0.22 | -2.45 | 3.52 | 0.09 |
| E2 | GY  | 7B | AX.89512356 | 1.25E+08 | 0.20 | -2.80 | 4.13 | 0.10 |
| E2 | GY  | 7B | AX.89512356 | 1.25E+08 | 0.20 | -2.80 | 4.13 | 0.10 |
| E2 | GY  | 7B | AX.89496093 | 1.25E+08 | 0.20 | -2.80 | 4.13 | 0.10 |
| E2 | GY  | 7B | AX.89371264 | 1.34E+08 | 0.22 | -2.45 | 3.52 | 0.09 |
| E2 | GY  | 7B | AX.89653266 | 1.27E+08 | 0.21 | -2.45 | 3.36 | 0.09 |
| E2 | GPS | 7B | AX.89344849 | 7.22E+08 | 0.29 | -1.55 | 3.37 | 0.05 |
| E2 | GY  | 7B | AX.89371848 | 1.25E+08 | 0.20 | -2.80 | 4.13 | 0.10 |
| E2 | GY  | 7B | AX.89371848 | 1.25E+08 | 0.20 | -2.80 | 4.13 | 0.10 |
| E2 | GY  | 7B | AX.89546755 | 7.20E+08 | 0.06 | -4.64 | 3.76 | 0.04 |
| E2 | GY  | 7B | AX.89509174 | 1.25E+08 | 0.20 | -2.80 | 4.13 | 0.10 |
| E2 | GY  | 7B | AX.89408294 | 1.25E+08 | 0.20 | -2.44 | 3.22 | 0.08 |
| E2 | GY  | 7B | AX.89337128 | 1.46E+08 | 0.19 | -2.40 | 3.05 | 0.04 |
| E2 | GY  | 7B | AX.89432264 | 3.39E+07 | 0.08 | -4.19 | 4.43 | 0.08 |
| E2 | GY  | 7B | AX.89432264 | 3.39E+07 | 0.08 | -4.19 | 4.43 | 0.08 |
| E2 | GY  | 7B | AX.89348742 | 1.24E+08 | 0.20 | -2.79 | 4.06 | 0.10 |
| E2 | GY  | 7B | AX.89646582 | 1.34E+08 | 0.22 | -2.45 | 3.52 | 0.09 |
| E2 | GY  | 7B | AX.89548327 | 1.25E+08 | 0.20 | -2.44 | 3.22 | 0.08 |
| E2 | GY  | 7B | AX.89478960 | 3.39E+07 | 0.07 | -5.05 | 5.01 | 0.10 |
| E2 | GY  | 7B | AX.89478960 | 3.39E+07 | 0.07 | -5.05 | 5.01 | 0.10 |
| E2 | GY  | 7B | AX.89373466 | 3.38E+07 | 0.09 | -3.64 | 3.60 | 0.07 |
| E2 | GY  | 7B | AX.89572322 | 1.25E+08 | 0.20 | -2.80 | 4.13 | 0.10 |
| E2 | GY  | 7B | AX.89584578 | 1.43E+08 | 0.11 | -3.43 | 3.69 | 0.07 |
| E2 | GY  | 7B | AX.89584578 | 1.43E+08 | 0.11 | -3.43 | 3.69 | 0.07 |
| E2 | GY  | 7B | AX.89583303 | 1.25E+08 | 0.20 | -2.80 | 4.13 | 0.10 |
| E2 | GY  | 7B | AX.89583303 | 1.25E+08 | 0.20 | -2.80 | 4.13 | 0.10 |
| E2 | GY  | 7B | AX.89605701 | 1.24E+08 | 0.20 | -2.79 | 4.06 | 0.10 |

|    |      |    |             |          |      |          |      |      |
|----|------|----|-------------|----------|------|----------|------|------|
| E2 | GY   | 7B | AX.89605701 | 1.24E+08 | 0.20 | -2.79    | 4.06 | 0.10 |
| E2 | GPS  | 7B | AX.89387103 | 7.23E+08 | 0.26 | -1.53    | 3.13 | 0.05 |
| E2 | GY   | 7B | AX.89445902 | 1.25E+08 | 0.20 | -2.59    | 3.55 | 0.09 |
| E2 | GY   | 7B | AX.89445902 | 1.25E+08 | 0.20 | -2.59    | 3.55 | 0.09 |
| E2 | GPS  | 7B | AX.89525378 | 7.24E+08 | 0.20 | -1.69    | 3.17 | 0.05 |
| E2 | GPM2 | 7B | AX.89532713 | 4.19E+08 | 0.16 | -665.07  | 3.13 | 0.05 |
| E2 | GY   | 7B | AX.89696915 | 1.25E+08 | 0.20 | -2.80    | 4.13 | 0.10 |
| E2 | GY   | 7B | AX.89752529 | 1.25E+08 | 0.20 | -2.80    | 4.13 | 0.10 |
| E2 | GY   | 7B | AX.89752529 | 1.25E+08 | 0.20 | -2.80    | 4.13 | 0.10 |
| E2 | GY   | 7B | AX.89529615 | 1.24E+08 | 0.20 | -2.38    | 3.04 | 0.07 |
| E2 | GPM2 | 7B | AX.89567542 | 2.43E+07 | 0.06 | -1424.14 | 5.17 | 0.11 |
| E2 | GY   | 7B | AX.89724261 | 1.25E+08 | 0.20 | -2.41    | 3.14 | 0.08 |
| E2 | GY   | 7B | AX.89470413 | 1.25E+08 | 0.20 | -2.80    | 4.13 | 0.10 |
| E2 | GY   | 7B | AX.89342460 | 1.45E+08 | 0.27 | -2.36    | 3.68 | 0.09 |
| E2 | GY   | 7B | AX.89342460 | 1.45E+08 | 0.27 | -2.36    | 3.68 | 0.09 |
| E2 | GY   | 7B | AX.89402156 | 1.35E+08 | 0.17 | -2.61    | 3.31 | 0.06 |
| E2 | GY   | 7B | AX.89402156 | 1.35E+08 | 0.17 | -2.61    | 3.31 | 0.06 |
| E2 | GPS  | 7B | AX.89733307 | 7.23E+08 | 0.35 | -1.40    | 3.08 | 0.04 |
| E2 | GY   | 7B | AX.89772656 | 1.25E+08 | 0.20 | -2.80    | 4.13 | 0.10 |
| E2 | GY   | 7B | AX.89772656 | 1.25E+08 | 0.20 | -2.80    | 4.13 | 0.10 |
| E2 | GY   | 7B | AX.89366919 | 1.25E+08 | 0.20 | -2.80    | 4.13 | 0.10 |
| E2 | GY   | 7B | AX.89367004 | 3.38E+07 | 0.09 | -3.78    | 3.84 | 0.07 |
| E2 | GY   | 7B | AX.89367004 | 3.38E+07 | 0.09 | -3.78    | 3.84 | 0.07 |
| E2 | GY   | 7B | AX.89485700 | 1.26E+08 | 0.21 | -2.34    | 3.12 | 0.08 |
| E2 | GY   | 7B | AX.89485700 | 1.26E+08 | 0.21 | -2.34    | 3.12 | 0.08 |
| E2 | GY   | 7B | AX.89380451 | 1.25E+08 | 0.20 | -2.76    | 3.98 | 0.10 |
| E2 | GPS  | 7B | AX.89500899 | 7.22E+08 | 0.29 | -1.48    | 3.11 | 0.04 |
| E2 | GY   | 7B | AX.89496093 | 1.25E+08 | 0.20 | -2.80    | 4.13 | 0.10 |
| E2 | GPM2 | 7B | AX.89572278 | 2.89E+07 | 0.37 | -497.76  | 3.01 | 0.05 |
| E2 | GY   | 7B | AX.89551103 | 1.25E+08 | 0.20 | -2.80    | 4.13 | 0.10 |
| E2 | GY   | 7B | AX.89551103 | 1.25E+08 | 0.20 | -2.80    | 4.13 | 0.10 |
| E2 | GY   | 7B | AX.89490498 | 1.25E+08 | 0.20 | -2.56    | 3.61 | 0.09 |
| E2 | GY   | 7B | AX.89490498 | 1.25E+08 | 0.20 | -2.56    | 3.61 | 0.09 |
| E2 | GY   | 7B | AX.89348742 | 1.24E+08 | 0.20 | -2.79    | 4.06 | 0.10 |
| E2 | GY   | 7B | AX.89428294 | 1.33E+08 | 0.25 | -2.21    | 3.12 | 0.08 |
| E2 | GY   | 7B | AX.89646582 | 1.34E+08 | 0.22 | -2.45    | 3.52 | 0.09 |
| E2 | GY   | 7B | AX.89607333 | 1.26E+08 | 0.21 | -2.34    | 3.12 | 0.08 |
| E2 | GY   | 7B | AX.89607333 | 1.26E+08 | 0.21 | -2.34    | 3.12 | 0.08 |
| E2 | GY   | 7B | AX.89584606 | 1.25E+08 | 0.20 | -2.44    | 3.22 | 0.08 |
| E2 | GY   | 7B | AX.89584606 | 1.25E+08 | 0.20 | -2.44    | 3.22 | 0.08 |
| E2 | GY   | 7B | AX.89467240 | 1.24E+08 | 0.20 | -2.79    | 4.06 | 0.10 |
| E2 | GY   | 7B | AX.89467240 | 1.24E+08 | 0.20 | -2.79    | 4.06 | 0.10 |
| E2 | GY   | 7B | AX.89621414 | 9.93E+07 | 0.05 | -4.80    | 3.72 | 0.08 |
| E2 | GY   | 7B | AX.89768336 | 1.25E+08 | 0.20 | -2.80    | 4.13 | 0.10 |
| E2 | GY   | 7B | AX.89768336 | 1.25E+08 | 0.20 | -2.80    | 4.13 | 0.10 |
| E2 | GY   | 7B | AX.89422373 | 3.38E+07 | 0.08 | -4.67    | 5.12 | 0.10 |
| E2 | GY   | 7B | AX.89422373 | 3.38E+07 | 0.08 | -4.67    | 5.12 | 0.10 |
| E2 | GPS  | 7B | AX.89389066 | 7.24E+08 | 0.20 | -1.69    | 3.17 | 0.05 |
| E2 | GY   | 7B | AX.89529615 | 1.24E+08 | 0.20 | -2.38    | 3.04 | 0.07 |
| E2 | GY   | 7B | AX.89541032 | 3.38E+07 | 0.09 | -3.78    | 3.85 | 0.07 |

|    |      |    |             |          |      |          |      |      |
|----|------|----|-------------|----------|------|----------|------|------|
| E2 | GY   | 7B | AX.89764916 | 1.28E+08 | 0.21 | -2.46    | 3.47 | 0.09 |
| E2 | GY   | 7B | AX.89764916 | 1.28E+08 | 0.21 | -2.46    | 3.47 | 0.09 |
| E2 | GY   | 7B | AX.89467037 | 1.25E+08 | 0.20 | -2.59    | 3.55 | 0.09 |
| E2 | GY   | 7B | AX.89467037 | 1.25E+08 | 0.20 | -2.59    | 3.55 | 0.09 |
| E2 | GPS  | 7B | AX.89627097 | 5.22E+06 | 0.17 | -2.01    | 3.86 | 0.07 |
| E2 | GY   | 7B | AX.89652443 | 1.25E+08 | 0.20 | -2.80    | 4.13 | 0.10 |
| E2 | GY   | 7B | AX.89652443 | 1.25E+08 | 0.20 | -2.80    | 4.13 | 0.10 |
| E2 | GY   | 7B | AX.89616288 | 1.34E+08 | 0.25 | -2.21    | 3.12 | 0.08 |
| E2 | GY   | 7B | AX.89440767 | 1.25E+08 | 0.20 | -2.80    | 4.13 | 0.10 |
| E2 | GY   | 7B | AX.89593306 | 1.25E+08 | 0.20 | -2.44    | 3.22 | 0.08 |
| E2 | GY   | 7B | AX.89573280 | 1.26E+08 | 0.21 | -2.30    | 3.02 | 0.08 |
| E2 | GY   | 7B | AX.89504337 | 3.38E+07 | 0.24 | -2.20    | 3.03 | 0.05 |
| E2 | GY   | 7B | AX.89740217 | 1.25E+08 | 0.20 | -2.80    | 4.13 | 0.10 |
| E2 | GY   | 7B | AX.89740217 | 1.25E+08 | 0.20 | -2.80    | 4.13 | 0.10 |
| E2 | GPM2 | 7B | AX.89596767 | 4.12E+08 | 0.16 | -665.07  | 3.13 | 0.05 |
| E2 | GY   | 7B | AX.89428294 | 1.33E+08 | 0.25 | -2.21    | 3.12 | 0.08 |
| E2 | GY   | 7B | AX.89668377 | 1.34E+08 | 0.23 | -2.34    | 3.29 | 0.08 |
| E2 | GY   | 7B | AX.89668377 | 1.34E+08 | 0.23 | -2.34    | 3.29 | 0.08 |
| E2 | GY   | 7B | AX.89373466 | 3.38E+07 | 0.09 | -3.64    | 3.60 | 0.07 |
| E2 | GPS  | 7B | AX.89542111 | 7.22E+08 | 0.20 | -1.68    | 3.10 | 0.05 |
| E2 | GY   | 7B | AX.89573280 | 1.26E+08 | 0.21 | -2.30    | 3.02 | 0.08 |
| E2 | GY   | 7B | AX.89550633 | 1.25E+08 | 0.20 | -2.60    | 3.63 | 0.09 |
| E2 | GY   | 7B | AX.89574468 | 1.26E+08 | 0.21 | -2.34    | 3.12 | 0.08 |
| E2 | GY   | 7B | AX.89541032 | 3.38E+07 | 0.09 | -3.78    | 3.85 | 0.07 |
| E2 | GY   | 7B | AX.89557410 | 1.34E+08 | 0.22 | -2.45    | 3.47 | 0.09 |
| E2 | GY   | 7B | AX.89504337 | 3.38E+07 | 0.24 | -2.20    | 3.03 | 0.05 |
| E2 | GPS  | 7B | AX.89365162 | 7.23E+08 | 0.20 | -1.68    | 3.10 | 0.05 |
| E2 | GY   | 7B | AX.89616288 | 1.34E+08 | 0.25 | -2.21    | 3.12 | 0.08 |
| E2 | GPS  | 7B | AX.89442633 | 7.22E+08 | 0.20 | -1.71    | 3.20 | 0.05 |
| E2 | GPM2 | 7B | AX.89422373 | 3.38E+07 | 0.08 | -945.60  | 3.42 | 0.07 |
| E2 | GY   | 7B | AX.89499678 | 1.37E+08 | 0.18 | -2.61    | 3.41 | 0.05 |
| E2 | GY   | 7B | AX.89371264 | 1.34E+08 | 0.22 | -2.45    | 3.52 | 0.09 |
| E2 | GY   | 7B | AX.89736261 | 1.26E+08 | 0.21 | -2.34    | 3.12 | 0.08 |
| E2 | GPS  | 7B | AX.89732305 | 7.22E+08 | 0.29 | -1.55    | 3.37 | 0.05 |
| E2 | GPS  | 7B | AX.89770281 | 7.22E+08 | 0.28 | -1.54    | 3.29 | 0.05 |
| E2 | GPS  | 7B | AX.89732098 | 7.22E+08 | 0.28 | -1.54    | 3.29 | 0.05 |
| E2 | GY   | 7B | AX.89509174 | 1.25E+08 | 0.20 | -2.80    | 4.13 | 0.10 |
| E2 | GPM2 | 7B | AX.89457197 | 2.58E+06 | 0.05 | -1191.72 | 3.20 | 0.08 |
| E2 | GY   | 7B | AX.89408294 | 1.25E+08 | 0.20 | -2.44    | 3.22 | 0.08 |
| E2 | GY   | 7B | AX.89761603 | 1.28E+08 | 0.21 | -2.31    | 3.10 | 0.08 |
| E2 | GY   | 7B | AX.89550633 | 1.25E+08 | 0.20 | -2.60    | 3.63 | 0.09 |
| E2 | GY   | 7B | AX.89499678 | 1.37E+08 | 0.18 | -2.61    | 3.41 | 0.05 |
| E2 | GY   | 7B | AX.89557410 | 1.34E+08 | 0.22 | -2.45    | 3.47 | 0.09 |
| E2 | GY   | 7B | AX.89736261 | 1.26E+08 | 0.21 | -2.34    | 3.12 | 0.08 |
| E2 | GPS  | 7B | AX.89400842 | 5.22E+06 | 0.08 | -2.60    | 3.54 | 0.06 |
| E2 | GPS  | 7B | AX.89537754 | 7.22E+08 | 0.28 | -1.54    | 3.29 | 0.05 |
| E2 | GY   | 7B | AX.89761603 | 1.28E+08 | 0.21 | -2.31    | 3.10 | 0.08 |
| E2 | GPS  | 7B | AX.89711907 | 7.24E+08 | 0.20 | -1.68    | 3.10 | 0.05 |
| E2 | GY   | 7B | AX.89630887 | 1.33E+08 | 0.25 | -2.21    | 3.12 | 0.08 |
| E2 | GPM2 | 7B | AX.89478960 | 3.39E+07 | 0.07 | -968.81  | 3.06 | 0.06 |



|    |      |    |               |          |      |          |      |      |
|----|------|----|---------------|----------|------|----------|------|------|
| E2 | GPS  | 7B | AX.89656107   | 7.22E+08 | 0.29 | -1.55    | 3.37 | 0.05 |
| E2 | GY   | 7B | AX.89630887   | 1.33E+08 | 0.25 | -2.21    | 3.12 | 0.08 |
| E2 | GPS  | 7B | AX.89572087   | 7.31E+08 | 0.27 | -1.50    | 3.06 | 0.05 |
| E3 | GPM2 | 7B | AX.89668688   | 7.46E+06 | 0.15 | 1197.86  | 3.17 | 0.09 |
| E3 | GPM2 | 7B | AX.89763546   | 3.51E+07 | 0.15 | -1304.09 | 3.68 | 0.07 |
| E3 | GPM2 | 7B | AX.89720905   | 3.51E+07 | 0.14 | -1315.38 | 3.64 | 0.07 |
| E3 | GPM2 | 7B | AX.89558096   | 3.61E+07 | 0.14 | -1278.98 | 3.49 | 0.06 |
| E3 | GPM2 | 7B | AX.89640625   | 4.92E+07 | 0.49 | 951.47   | 3.00 | 0.12 |
| E3 | GPM2 | 7B | AX.89748150   | 5.76E+07 | 0.49 | 954.97   | 3.15 | 0.12 |
| E3 | GPM2 | 7B | AX.89550945   | 6.30E+07 | 0.16 | 1219.89  | 3.01 | 0.10 |
| E3 | GPM2 | 7B | AX.89505337   | 6.49E+08 | 0.43 | 891.91   | 3.18 | 0.09 |
| E3 | GPM2 | 7B | AX.89699239   | 6.53E+08 | 0.38 | 897.14   | 3.03 | 0.12 |
| E3 | GPM2 | 7B | AX.89663338   | 6.88E+08 | 0.39 | -900.82  | 3.02 | 0.08 |
| E3 | GPM2 | 7B | AX.89754941   | 6.88E+08 | 0.39 | -900.82  | 3.02 | 0.08 |
| E3 | GPM2 | 7B | AX.89441665   | 6.88E+08 | 0.39 | -900.82  | 3.02 | 0.08 |
| E3 | GPM2 | 7B | X.89739629_OT | 7.11E+08 | 0.23 | 1143.21  | 3.62 | 0.09 |
| E3 | GPM2 | 7B | X.89397389_OT | 7.11E+08 | 0.23 | 1143.21  | 3.62 | 0.09 |
| E3 | GPM2 | 7B | X.89505633_OT | 7.11E+08 | 0.23 | 1143.21  | 3.62 | 0.09 |
| E3 | GPM2 | 7B | X.89708397_OT | 7.11E+08 | 0.23 | 1145.46  | 3.63 | 0.09 |
| E3 | GPM2 | 7B | AX.89658728   | 7.21E+08 | 0.34 | 906.82   | 3.11 | 0.06 |
| E3 | GPM2 | 7B | AX.89697567   | 7.32E+08 | 0.37 | 855.34   | 3.03 | 0.01 |
| E3 | GPM2 | 7B | X.89561834_OT | 7.34E+08 | 0.31 | 926.74   | 3.17 | 0.06 |
| E3 | GPM2 | 7B | X.89746395_OT | 7.34E+08 | 0.33 | 903.58   | 3.08 | 0.06 |
| E3 | GPM2 | 7B | AX.89521287   | 7.40E+08 | 0.15 | 1196.88  | 3.17 | 0.04 |
| E3 | GPS  | 7B | AX.89653581   | 6.14E+08 | 0.29 | 2.60     | 3.40 | 0.11 |
| E3 | GPS  | 7B | AX.89591041   | 6.14E+08 | 0.54 | 2.04     | 3.17 | 0.08 |
| E3 | GPS  | 7B | AX.89607431   | 6.14E+08 | 0.29 | 2.62     | 3.51 | 0.11 |
| E3 | GPS  | 7B | AX.89496416   | 6.15E+08 | 0.53 | 2.41     | 4.27 | 0.11 |
| E3 | GPS  | 7B | AX.89661304   | 6.15E+08 | 0.51 | 2.18     | 3.57 | 0.10 |
| E3 | GPS  | 7B | AX.89335459   | 6.40E+08 | 0.33 | 2.08     | 3.16 | 0.07 |
| E3 | GPS  | 7B | AX.89416974   | 6.40E+08 | 0.33 | 2.08     | 3.16 | 0.07 |
| E3 | GPS  | 7B | AX.89416623   | 6.40E+08 | 0.32 | 2.13     | 3.30 | 0.07 |
| E3 | GPS  | 7B | AX.89635654   | 6.40E+08 | 0.33 | 2.03     | 3.05 | 0.07 |
| E3 | GPS  | 7B | AX.89645291   | 6.14E+08 | 0.29 | 2.70     | 3.60 | 0.11 |
| E3 | GPS  | 7B | AX.89768040   | 6.14E+08 | 0.28 | 2.57     | 3.28 | 0.11 |
| E3 | GPS  | 7B | AX.89492079   | 6.14E+08 | 0.28 | 2.78     | 3.72 | 0.12 |
| E3 | GPS  | 7B | AX.89440470   | 6.14E+08 | 0.28 | 2.57     | 3.28 | 0.11 |
| E3 | GPS  | 7B | AX.89702526   | 6.14E+08 | 0.53 | 2.26     | 3.82 | 0.10 |
| E3 | GPS  | 7B | AX.89483489   | 6.14E+08 | 0.29 | 2.69     | 3.63 | 0.11 |
| E3 | GPS  | 7B | AX.89514787   | 6.14E+08 | 0.29 | 2.56     | 3.33 | 0.11 |
| E3 | GPS  | 7B | AX.89470220   | 6.14E+08 | 0.29 | 2.82     | 3.97 | 0.12 |
| E3 | GPS  | 7B | AX.89469662   | 6.14E+08 | 0.29 | 2.54     | 3.27 | 0.11 |
| E3 | GPS  | 7B | AX.89610172   | 6.14E+08 | 0.28 | 2.64     | 3.39 | 0.11 |
| E3 | GPS  | 7B | AX.89596241   | 6.14E+08 | 0.28 | 2.57     | 3.28 | 0.11 |
| E3 | GPS  | 7B | AX.89727231   | 6.14E+08 | 0.29 | 2.70     | 3.60 | 0.11 |
| E3 | GPS  | 7B | AX.89641530   | 6.59E+07 | 0.39 | -2.21    | 3.01 | 0.09 |
| E3 | GPS  | 7B | AX.89509563   | 6.64E+07 | 0.39 | -2.25    | 3.10 | 0.10 |
| E3 | GPS  | 7B | AX.89347104   | 6.65E+07 | 0.40 | -2.25    | 3.17 | 0.10 |
| E3 | GPS  | 7B | AX.89317429   | 5.48E+08 | 0.20 | -2.61    | 3.16 | 0.07 |
| E3 | GPS  | 7B | AX.89481286   | 5.48E+08 | 0.26 | -2.31    | 3.10 | 0.07 |

|    |     |    |               |          |      |       |      |      |
|----|-----|----|---------------|----------|------|-------|------|------|
| E3 | GPS | 7B | AX.89651804   | 5.51E+08 | 0.21 | -2.58 | 3.16 | 0.07 |
| E3 | GPS | 7B | AX.89652106   | 6.14E+08 | 0.47 | 2.04  | 3.06 | 0.09 |
| E3 | GPS | 7B | AX.89700190   | 6.14E+08 | 0.28 | 2.57  | 3.28 | 0.11 |
| E3 | GPS | 7B | AX.89721851   | 6.14E+08 | 0.28 | 2.78  | 3.72 | 0.12 |
| E3 | TKW | 7B | AX.89718058   | 5.72E+07 | 0.25 | 0.98  | 3.29 | 0.08 |
| E3 | TKW | 7B | X.89328028_OT | 5.73E+07 | 0.25 | 0.95  | 3.11 | 0.07 |
| E3 | TKW | 7B | AX.89347358   | 5.75E+07 | 0.10 | 1.58  | 3.89 | 0.14 |
| E3 | TKW | 7B | AX.89356648   | 5.87E+07 | 0.26 | 0.96  | 3.17 | 0.08 |
| E3 | TKW | 7B | AX.89649105   | 5.87E+07 | 0.23 | 1.15  | 3.80 | 0.11 |
| E3 | TKW | 7B | AX.89556910   | 5.87E+07 | 0.23 | 1.15  | 3.80 | 0.11 |
| E3 | TKW | 7B | AX.89708198   | 5.87E+07 | 0.23 | 1.15  | 3.80 | 0.11 |
| E3 | TKW | 7B | AX.89608747   | 5.87E+07 | 0.23 | 1.15  | 3.80 | 0.11 |
| E3 | TKW | 7B | AX.89585939   | 5.88E+07 | 0.23 | 1.15  | 3.80 | 0.11 |
| E3 | TKW | 7B | AX.89750995   | 5.88E+07 | 0.23 | 1.15  | 3.80 | 0.11 |
| E3 | TKW | 7B | AX.89380148   | 5.88E+07 | 0.23 | 1.15  | 3.80 | 0.11 |
| E3 | TKW | 7B | AX.89523330   | 5.88E+07 | 0.23 | 1.15  | 3.80 | 0.11 |
| E3 | TKW | 7B | AX.89668434   | 5.88E+07 | 0.22 | 1.18  | 3.94 | 0.11 |
| E3 | TKW | 7B | AX.89493106   | 5.88E+07 | 0.23 | 1.15  | 3.80 | 0.11 |
| E3 | TKW | 7B | AX.89721798   | 5.88E+07 | 0.23 | 1.15  | 3.80 | 0.11 |
| E3 | TKW | 7B | AX.89722888   | 5.88E+07 | 0.23 | 1.15  | 3.80 | 0.11 |
| E3 | TKW | 7B | AX.89318969   | 5.89E+07 | 0.22 | 1.21  | 4.16 | 0.12 |
| E3 | TKW | 7B | AX.89352670   | 5.91E+07 | 0.22 | 1.21  | 4.16 | 0.12 |
| E3 | TKW | 7B | AX.89734626   | 5.91E+07 | 0.22 | 1.21  | 4.16 | 0.12 |
| E3 | TKW | 7B | AX.89405370   | 5.91E+07 | 0.22 | 1.19  | 3.98 | 0.12 |
| E3 | TKW | 7B | AX.89397601   | 5.91E+07 | 0.22 | 1.19  | 3.98 | 0.12 |
| E3 | TKW | 7B | AX.89332408   | 6.82E+07 | 0.10 | -1.29 | 3.05 | 0.03 |
| E3 | TKW | 7B | AX.89614057   | 5.93E+08 | 0.06 | -1.70 | 3.17 | 0.03 |
| E3 | TKW | 7B | AX.89365641   | 5.93E+08 | 0.06 | -1.70 | 3.17 | 0.03 |
| E3 | TKW | 7B | AX.89727940   | 5.93E+08 | 0.06 | -1.70 | 3.17 | 0.03 |
| E3 | TKW | 7B | AX.89597240   | 5.93E+08 | 0.06 | -1.70 | 3.17 | 0.03 |
| E3 | TKW | 7B | AX.89337309   | 5.94E+08 | 0.07 | -1.55 | 3.07 | 0.02 |
| E3 | TKW | 7B | AX.89619692   | 5.94E+08 | 0.07 | -1.55 | 3.07 | 0.02 |
| E3 | TKW | 7B | AX.89592310   | 5.94E+08 | 0.06 | -1.69 | 3.17 | 0.03 |
| E3 | TKW | 7B | AX.89511546   | 5.94E+08 | 0.07 | -1.61 | 3.17 | 0.02 |
| E3 | TKW | 7B | AX.89492490   | 5.94E+08 | 0.07 | -1.50 | 3.03 | 0.01 |
| E3 | TKW | 7B | AX.89752147   | 5.94E+08 | 0.08 | -1.56 | 3.37 | 0.02 |
| E3 | TKW | 7B | X.89413785_OT | 6.04E+08 | 0.16 | 1.20  | 3.02 | 0.10 |
| E3 | TKW | 7B | X.89667077_OT | 6.04E+08 | 0.16 | 1.20  | 3.02 | 0.10 |
| E3 | TKW | 7B | AX.89591239   | 6.12E+08 | 0.19 | 1.26  | 3.84 | 0.13 |
| E3 | TKW | 7B | X.89421973_OT | 6.12E+08 | 0.19 | 1.26  | 3.84 | 0.13 |
| E3 | TKW | 7B | AX.89777369   | 6.91E+08 | 0.40 | -0.83 | 3.04 | 0.03 |
| E3 | TKW | 7B | AX.89476237   | 7.05E+08 | 0.09 | -1.43 | 3.09 | 0.05 |
| E3 | TKW | 7B | AX.89337734   | 7.06E+08 | 0.08 | -1.71 | 3.47 | 0.05 |
| E3 | TKW | 7B | AX.89490475   | 7.06E+08 | 0.08 | -1.71 | 3.47 | 0.05 |
| E3 | TKW | 7B | AX.89575481   | 7.06E+08 | 0.08 | -1.71 | 3.47 | 0.05 |
| E3 | TKW | 7B | AX.89344008   | 7.06E+08 | 0.07 | -1.96 | 3.93 | 0.06 |
| E3 | TKW | 7B | AX.89642094   | 7.07E+08 | 0.07 | -1.72 | 3.27 | 0.05 |
| E3 | TKW | 7B | AX.89606362   | 7.08E+08 | 0.07 | -1.72 | 3.27 | 0.05 |
| E3 | TKW | 7B | AX.89375450   | 7.22E+08 | 0.18 | -1.03 | 3.01 | 0.01 |
| E3 | TKW | 7B | AX.89646540   | 7.25E+08 | 0.09 | -1.39 | 3.09 | 0.01 |

|    |      |    |               |          |      |         |      |      |
|----|------|----|---------------|----------|------|---------|------|------|
| E3 | TKW  | 7B | AX.89773642   | 7.25E+08 | 0.09 | -1.45   | 3.26 | 0.01 |
| E3 | TKW  | 7B | AX.89624023   | 7.44E+08 | 0.26 | 0.93    | 3.04 | 0.09 |
| E3 | GY   | 7B | AX.89534547   | 1.17E+07 | 0.48 | 2.92    | 3.47 | 0.05 |
| E3 | GY   | 7B | AX.89578776   | 7.08E+08 | 0.40 | -3.19   | 3.79 | 0.09 |
| E3 | GY   | 7B | AX.89621133   | 7.09E+08 | 0.48 | -3.14   | 3.92 | 0.07 |
| E3 | GY   | 7B | X.89647317_OT | 7.10E+08 | 0.26 | 3.24    | 3.06 | 0.05 |
| E3 | SPM2 | 7B | AX.89421417   | 8.53E+07 | 0.38 | -20.53  | 3.25 | 0.07 |
| E3 | SPM2 | 7B | AX.89413060   | 8.53E+07 | 0.38 | -20.53  | 3.25 | 0.07 |
| E3 | SPM2 | 7B | AX.89608641   | 8.55E+07 | 0.38 | -20.53  | 3.25 | 0.07 |
| E3 | GY   | 7B | X.89739629_OT | 7.11E+08 | 0.23 | 3.83    | 3.68 | 0.07 |
| E3 | GY   | 7B | X.89397389_OT | 7.11E+08 | 0.23 | 3.83    | 3.68 | 0.07 |
| E3 | GY   | 7B | X.89505633_OT | 7.11E+08 | 0.23 | 3.83    | 3.68 | 0.07 |
| E3 | GY   | 7B | X.89708397_OT | 7.11E+08 | 0.23 | 3.95    | 3.88 | 0.07 |
| E3 | GY   | 7B | AX.89636895   | 7.15E+08 | 0.18 | -3.64   | 3.07 | 0.05 |
| E3 | SPM2 | 7B | AX.89334838   | 8.58E+07 | 0.38 | -20.53  | 3.25 | 0.07 |
| E3 | SPM2 | 7B | AX.89700399   | 8.70E+07 | 0.38 | -20.53  | 3.25 | 0.07 |
| E3 | TKW  | 7B | AX.89763546   | 3.51E+07 | 0.15 | 1.28    | 3.68 | 0.09 |
| E3 | TKW  | 7B | AX.89720905   | 3.51E+07 | 0.14 | 1.29    | 3.63 | 0.09 |
| E3 | TKW  | 7B | AX.89567140   | 3.61E+07 | 0.09 | 1.45    | 3.17 | 0.12 |
| E3 | TKW  | 7B | AX.89558096   | 3.61E+07 | 0.14 | 1.25    | 3.47 | 0.09 |
| E3 | TKW  | 7B | AX.89570074   | 5.36E+07 | 0.25 | 0.99    | 3.29 | 0.08 |
| E3 | TKW  | 7B | AX.89653409   | 5.36E+07 | 0.25 | 0.97    | 3.15 | 0.08 |
| E3 | TKW  | 7B | AX.89476988   | 5.43E+07 | 0.25 | 0.99    | 3.29 | 0.08 |
| E3 | TKW  | 7B | AX.89484661   | 5.43E+07 | 0.25 | 0.99    | 3.29 | 0.08 |
| E3 | TKW  | 7B | AX.89373542   | 5.43E+07 | 0.25 | 0.99    | 3.29 | 0.08 |
| E3 | TKW  | 7B | AX.89376880   | 5.43E+07 | 0.25 | 0.99    | 3.29 | 0.08 |
| E3 | TKW  | 7B | AX.89544893   | 5.48E+07 | 0.25 | 0.99    | 3.29 | 0.08 |
| E3 | TKW  | 7B | AX.89479303   | 5.48E+07 | 0.25 | 0.93    | 3.01 | 0.08 |
| E3 | TKW  | 7B | AX.89523378   | 5.48E+07 | 0.25 | 0.98    | 3.26 | 0.08 |
| E3 | TKW  | 7B | AX.89707517   | 5.48E+07 | 0.25 | 0.98    | 3.26 | 0.08 |
| E3 | TKW  | 7B | AX.89774834   | 5.48E+07 | 0.25 | 0.98    | 3.26 | 0.08 |
| E3 | TKW  | 7B | AX.89509435   | 5.53E+07 | 0.25 | 0.96    | 3.15 | 0.08 |
| E3 | TKW  | 7B | AX.89356004   | 5.59E+07 | 0.25 | 1.08    | 3.88 | 0.09 |
| E3 | TKW  | 7B | X.89453230_OT | 5.59E+07 | 0.25 | 1.01    | 3.38 | 0.08 |
| E3 | TKW  | 7B | X.89756228_OT | 5.67E+07 | 0.23 | 0.99    | 3.21 | 0.08 |
| E3 | TKW  | 7B | X.89605256_OT | 5.68E+07 | 0.25 | 0.99    | 3.31 | 0.07 |
| E3 | TKW  | 7B | X.89591686_OT | 5.69E+07 | 0.23 | 0.96    | 3.10 | 0.08 |
| E3 | TKW  | 7B | X.89548248_OT | 5.70E+07 | 0.25 | 0.98    | 3.29 | 0.08 |
| E3 | SPM2 | 7B | AX.89627785   | 8.70E+07 | 0.34 | -21.05  | 3.14 | 0.07 |
| E3 | SPM2 | 7B | AX.89489197   | 8.70E+07 | 0.34 | -21.05  | 3.14 | 0.07 |
| E3 | SPM2 | 7B | AX.89733748   | 7.42E+08 | 0.21 | 23.64   | 3.14 | 0.07 |
| E4 | GPM2 | 7B | AX.89573902   | 5.42E+08 | 0.43 | 472.34  | 3.15 | 0.05 |
| E4 | GPM2 | 7B | AX.89497580   | 6.06E+08 | 0.33 | -481.30 | 3.12 | 0.08 |
| E4 | GPS  | 7B | AX.89761025   | 1.10E+06 | 0.09 | 2.64    | 3.51 | 0.04 |
| E4 | GPS  | 7B | AX.89390019   | 5.46E+08 | 0.27 | 1.73    | 3.01 | 0.05 |
| E4 | GPS  | 7B | AX.89473542   | 7.01E+08 | 0.37 | 1.60    | 3.39 | 0.04 |
| E4 | GPS  | 7B | X.89391320_OT | 7.17E+08 | 0.08 | -2.76   | 3.26 | 0.05 |
| E4 | GY   | 7B | AX.89699607   | 7.16E+08 | 0.16 | 2.05    | 3.30 | 0.05 |
| E4 | GY   | 7B | AX.89744325   | 7.16E+08 | 0.16 | 2.05    | 3.30 | 0.05 |
| E4 | GY   | 7B | AX.89615954   | 7.16E+08 | 0.17 | 1.96    | 3.12 | 0.05 |

|    |      |    |               |          |      |        |      |      |
|----|------|----|---------------|----------|------|--------|------|------|
| E4 | GY   | 7B | AX.89317860   | 7.16E+08 | 0.17 | 2.01   | 3.26 | 0.05 |
| E4 | GY   | 7B | AX.89558813   | 7.16E+08 | 0.16 | 2.05   | 3.30 | 0.05 |
| E4 | GY   | 7B | AX.89702387   | 7.16E+08 | 0.16 | 2.05   | 3.30 | 0.05 |
| E4 | GY   | 7B | AX.89660937   | 7.16E+08 | 0.14 | 2.23   | 3.44 | 0.05 |
| E4 | GY   | 7B | AX.89618851   | 7.16E+08 | 0.16 | 2.05   | 3.30 | 0.05 |
| E4 | GY   | 7B | AX.89740742   | 7.16E+08 | 0.16 | 2.05   | 3.30 | 0.05 |
| E4 | GY   | 7B | AX.89670129   | 7.17E+08 | 0.16 | 2.19   | 3.57 | 0.05 |
| E4 | GY   | 7B | AX.89392875   | 7.17E+08 | 0.16 | 2.05   | 3.30 | 0.05 |
| E4 | GY   | 7B | AX.89554739   | 7.17E+08 | 0.16 | 2.05   | 3.30 | 0.05 |
| E4 | GY   | 7B | AX.89317458   | 7.17E+08 | 0.16 | 2.05   | 3.30 | 0.05 |
| E4 | GY   | 7B | AX.89765675   | 7.16E+08 | 0.17 | 1.90   | 3.02 | 0.04 |
| E4 | GY   | 7B | AX.89588125   | 7.16E+08 | 0.17 | 1.90   | 3.02 | 0.04 |
| E4 | GY   | 7B | AX.89596685   | 7.16E+08 | 0.17 | 1.90   | 3.02 | 0.04 |
| E4 | GY   | 7B | AX.89649345   | 7.16E+08 | 0.17 | 1.90   | 3.02 | 0.04 |
| E4 | GY   | 7B | AX.89334868   | 7.16E+08 | 0.17 | 1.90   | 3.02 | 0.04 |
| E4 | GY   | 7B | AX.89593857   | 7.16E+08 | 0.17 | 1.90   | 3.02 | 0.04 |
| E4 | GY   | 7B | AX.89678787   | 7.16E+08 | 0.16 | 2.05   | 3.30 | 0.05 |
| E4 | SPM2 | 7B | AX.89379932   | 1.21E+08 | 0.31 | -17.25 | 3.02 | 0.05 |
| E4 | SPM2 | 7B | AX.89591239   | 6.12E+08 | 0.19 | -22.92 | 3.42 | 0.04 |
| E4 | SPM2 | 7B | X.89421973_OT | 6.12E+08 | 0.19 | -22.92 | 3.42 | 0.04 |
| E4 | SPM2 | 7B | AX.89599879   | 6.36E+08 | 0.20 | 19.29  | 3.10 | 0.07 |
| E4 | SPM2 | 7B | AX.89757077   | 6.80E+08 | 0.26 | 18.13  | 3.23 | 0.03 |
| E4 | SPM2 | 7B | AX.89635871   | 6.80E+08 | 0.26 | 18.13  | 3.23 | 0.03 |
| E4 | SPM2 | 7B | AX.89686954   | 6.80E+08 | 0.26 | 18.13  | 3.23 | 0.03 |
| E4 | SPM2 | 7B | AX.89723106   | 6.80E+08 | 0.22 | 18.44  | 3.02 | 0.03 |
| E4 | SPM2 | 7B | AX.89605954   | 6.80E+08 | 0.22 | 18.44  | 3.02 | 0.03 |
| E4 | SPM2 | 7B | AX.89403402   | 6.80E+08 | 0.26 | 18.13  | 3.23 | 0.03 |
| E4 | SPM2 | 7B | AX.89585439   | 6.80E+08 | 0.26 | 18.13  | 3.23 | 0.03 |
| E4 | SPM2 | 7B | AX.89433228   | 6.80E+08 | 0.24 | 19.86  | 3.66 | 0.04 |
| E4 | SPM2 | 7B | AX.89640891   | 6.80E+08 | 0.26 | 18.13  | 3.23 | 0.03 |
| E4 | SPM2 | 7B | AX.89375681   | 6.80E+08 | 0.26 | 18.13  | 3.23 | 0.03 |
| E4 | SPM2 | 7B | AX.89407406   | 6.80E+08 | 0.25 | 19.84  | 3.71 | 0.04 |
| E4 | SPM2 | 7B | AX.89651617   | 6.80E+08 | 0.25 | 19.84  | 3.71 | 0.04 |
| E4 | SPM2 | 7B | AX.89658160   | 6.80E+08 | 0.26 | 18.13  | 3.23 | 0.03 |
| E4 | SPM2 | 7B | AX.89625147   | 6.80E+08 | 0.26 | 18.13  | 3.23 | 0.03 |
| E4 | SPM2 | 7B | AX.89355415   | 6.80E+08 | 0.26 | 18.13  | 3.23 | 0.03 |
| E4 | SPM2 | 7B | AX.89440840   | 6.80E+08 | 0.26 | 18.13  | 3.23 | 0.03 |
| E4 | SPM2 | 7B | AX.89311971   | 6.80E+08 | 0.23 | 20.13  | 3.56 | 0.03 |
| E4 | SPM2 | 7B | AX.89611011   | 6.82E+08 | 0.30 | -17.34 | 3.01 | 0.04 |
| E4 | SPM2 | 7B | X.89377909_OT | 7.08E+08 | 0.09 | 31.73  | 3.98 | 0.07 |
| E4 | TKW  | 7B | AX.89709974   | 6.52E+08 | 0.14 | 1.32   | 3.50 | 0.05 |
| E4 | TKW  | 7B | AX.89531452   | 6.52E+08 | 0.13 | 1.31   | 3.23 | 0.06 |
| E4 | TKW  | 7B | AX.89312529   | 6.52E+08 | 0.13 | 1.31   | 3.23 | 0.06 |
| E4 | TKW  | 7B | AX.89563370   | 6.53E+08 | 0.24 | 1.05   | 3.58 | 0.06 |
| E4 | TKW  | 7B | AX.89742364   | 6.57E+08 | 0.43 | 0.83   | 3.08 | 0.07 |
| E4 | TKW  | 7B | AX.89480846   | 6.57E+08 | 0.47 | 0.83   | 3.09 | 0.04 |
| E4 | TKW  | 7B | AX.89423478   | 6.57E+08 | 0.47 | 0.83   | 3.09 | 0.04 |
| E4 | TKW  | 7B | AX.89777369   | 6.91E+08 | 0.40 | -0.88  | 3.42 | 0.03 |
| E4 | TKW  | 7B | AX.89710206   | 7.05E+08 | 0.09 | -1.42  | 3.12 | 0.04 |
| E4 | TKW  | 7B | AX.89337461   | 7.06E+08 | 0.13 | -1.31  | 3.46 | 0.02 |

|    |      |    |             |          |      |       |      |      |
|----|------|----|-------------|----------|------|-------|------|------|
| E4 | TKW  | 7B | AX.89686472 | 7.06E+08 | 0.09 | -1.54 | 3.59 | 0.04 |
| E4 | TKW  | 7B | AX.89534746 | 7.06E+08 | 0.13 | -1.31 | 3.46 | 0.02 |
| E4 | TKW  | 7B | AX.89558471 | 7.06E+08 | 0.13 | -1.31 | 3.46 | 0.02 |
| E4 | TKW  | 7B | AX.89636896 | 7.06E+08 | 0.13 | -1.31 | 3.46 | 0.02 |
| E4 | TKW  | 7B | AX.89511616 | 7.06E+08 | 0.13 | -1.31 | 3.46 | 0.02 |
| E4 | TKW  | 7B | AX.89703591 | 7.06E+08 | 0.13 | -1.31 | 3.46 | 0.02 |
| E4 | TKW  | 7B | AX.89773610 | 7.06E+08 | 0.13 | -1.31 | 3.46 | 0.02 |
| E4 | TKW  | 7B | AX.89711767 | 7.06E+08 | 0.13 | -1.31 | 3.46 | 0.02 |
| E4 | TKW  | 7B | AX.89519084 | 7.06E+08 | 0.13 | -1.31 | 3.46 | 0.02 |
| E4 | TKW  | 7B | AX.89447859 | 7.06E+08 | 0.13 | -1.31 | 3.46 | 0.02 |
| E4 | TKW  | 7B | AX.89603717 | 7.06E+08 | 0.13 | -1.31 | 3.46 | 0.02 |
| E4 | TKW  | 7B | AX.89638517 | 7.06E+08 | 0.13 | -1.31 | 3.46 | 0.02 |
| E4 | TKW  | 7B | AX.89672290 | 7.06E+08 | 0.13 | -1.31 | 3.46 | 0.02 |
| E4 | TKW  | 7B | AX.89685760 | 7.06E+08 | 0.13 | -1.31 | 3.46 | 0.02 |
| E4 | TKW  | 7B | AX.89443247 | 7.06E+08 | 0.13 | -1.31 | 3.46 | 0.02 |
| E4 | TKW  | 7B | AX.89458919 | 7.06E+08 | 0.13 | -1.31 | 3.46 | 0.02 |
| E4 | TKW  | 7B | AX.89713023 | 7.06E+08 | 0.13 | -1.31 | 3.46 | 0.02 |
| E4 | TKW  | 7B | AX.89454176 | 7.06E+08 | 0.13 | -1.31 | 3.46 | 0.02 |
| E4 | TKW  | 7B | AX.89555837 | 7.06E+08 | 0.13 | -1.31 | 3.46 | 0.02 |
| E4 | TKW  | 7B | AX.89545049 | 7.06E+08 | 0.13 | -1.31 | 3.46 | 0.02 |
| E4 | TKW  | 7B | AX.89743598 | 7.06E+08 | 0.13 | -1.31 | 3.46 | 0.02 |
| E4 | TKW  | 7B | AX.89432444 | 7.06E+08 | 0.09 | -1.54 | 3.59 | 0.04 |
| E4 | TKW  | 7B | AX.89580997 | 7.06E+08 | 0.09 | -1.54 | 3.59 | 0.04 |
| E4 | TKW  | 7B | AX.89495741 | 7.06E+08 | 0.09 | -1.54 | 3.59 | 0.04 |
| E4 | TKW  | 7B | AX.89738534 | 7.06E+08 | 0.09 | -1.54 | 3.59 | 0.04 |
| E4 | TKW  | 7B | AX.89759475 | 7.06E+08 | 0.09 | -1.54 | 3.59 | 0.04 |
| E4 | TKW  | 7B | AX.89495772 | 7.06E+08 | 0.09 | -1.54 | 3.59 | 0.04 |
| E4 | TKW  | 7B | AX.89507839 | 7.06E+08 | 0.09 | -1.54 | 3.59 | 0.04 |
| E4 | TKW  | 7B | AX.89505673 | 7.06E+08 | 0.09 | -1.54 | 3.59 | 0.04 |
| E4 | TKW  | 7B | AX.89337734 | 7.06E+08 | 0.08 | -1.92 | 4.39 | 0.05 |
| E4 | TKW  | 7B | AX.89490475 | 7.06E+08 | 0.08 | -1.92 | 4.39 | 0.05 |
| E4 | TKW  | 7B | AX.89575481 | 7.06E+08 | 0.08 | -1.92 | 4.39 | 0.05 |
| E4 | TKW  | 7B | AX.89344008 | 7.06E+08 | 0.07 | -2.05 | 4.35 | 0.05 |
| E4 | TKW  | 7B | AX.89642094 | 7.07E+08 | 0.07 | -1.84 | 3.76 | 0.05 |
| E4 | TKW  | 7B | AX.89606362 | 7.08E+08 | 0.07 | -1.84 | 3.76 | 0.05 |
| E4 | TKW  | 7B | AX.89528636 | 7.08E+08 | 0.08 | -1.59 | 3.17 | 0.04 |
| E4 | TKW  | 7B | AX.89658728 | 7.21E+08 | 0.34 | -0.97 | 3.72 | 0.04 |
| E4 | TKW  | 7B | AX.89772254 | 7.22E+08 | 0.29 | -0.86 | 3.07 | 0.02 |
| E4 | TKW  | 7B | AX.89325530 | 7.24E+08 | 0.34 | -1.03 | 4.49 | 0.03 |
| E4 | TKW  | 7B | AX.89663962 | 7.24E+08 | 0.17 | -1.11 | 3.34 | 0.02 |
| E4 | TKW  | 7B | AX.89646540 | 7.25E+08 | 0.09 | -1.38 | 3.13 | 0.01 |
| E4 | TKW  | 7B | AX.89629887 | 7.32E+08 | 0.09 | 1.40  | 3.05 | 0.04 |
| E4 | TKW  | 7B | AX.89362583 | 7.33E+08 | 0.09 | 1.40  | 3.05 | 0.04 |
| E4 | TKW  | 7B | AX.89343384 | 7.34E+08 | 0.14 | 1.52  | 5.05 | 0.07 |
| E4 | TKW  | 7B | AX.89557382 | 7.34E+08 | 0.17 | 1.28  | 4.13 | 0.06 |
| E4 | TKW  | 7B | AX.89564789 | 7.42E+08 | 0.08 | 1.62  | 3.98 | 0.07 |
| E4 | TKW  | 7B | AX.89624023 | 7.44E+08 | 0.26 | 0.98  | 3.37 | 0.09 |
| E1 | SPM2 | 7D | AX.89635835 | 1.24E+08 | 0.27 | 18.72 | 3.21 | 0.06 |
| E1 | SPM2 | 7D | AX.89366664 | 1.11E+08 | 0.22 | 20.49 | 3.32 | 0.06 |
| E1 | SPM2 | 7D | AX.89453861 | 7.07E+06 | 0.17 | 21.69 | 3.14 | 0.05 |

|    |      |    |             |          |      |         |      |      |
|----|------|----|-------------|----------|------|---------|------|------|
| E1 | SPM2 | 7D | AX.89749449 | 7.40E+06 | 0.19 | 20.58   | 3.08 | 0.05 |
| E1 | GY   | 7D | AX.89554204 | 1.00E+07 | 0.16 | -3.79   | 4.42 | 0.07 |
| E1 | SPM2 | 7D | AX.89522121 | 6.58E+06 | 0.23 | 20.15   | 3.32 | 0.06 |
| E1 | SPM2 | 7D | AX.89564658 | 7.40E+06 | 0.19 | 20.80   | 3.09 | 0.05 |
| E1 | GY   | 7D | AX.89649617 | 6.21E+08 | 0.48 | -2.52   | 3.67 | 0.07 |
| E1 | SPM2 | 7D | AX.89416780 | 6.59E+06 | 0.20 | 21.31   | 3.32 | 0.06 |
| E1 | SPM2 | 7D | AX.89336154 | 6.14E+06 | 0.21 | 19.50   | 3.02 | 0.05 |
| E1 | SPM2 | 7D | AX.89352255 | 7.40E+06 | 0.18 | 22.67   | 3.45 | 0.06 |
| E1 | SPM2 | 7D | AX.89692632 | 7.41E+06 | 0.18 | 21.26   | 3.14 | 0.05 |
| E1 | SPM2 | 7D | AX.89462288 | 6.33E+08 | 0.47 | 17.52   | 3.53 | 0.05 |
| E1 | SPM2 | 7D | AX.89382448 | 7.40E+06 | 0.18 | 22.09   | 3.30 | 0.06 |
| E1 | SPM2 | 7D | AX.89738802 | 7.40E+06 | 0.22 | 19.99   | 3.20 | 0.06 |
| E1 | GY   | 7D | AX.89554204 | 1.00E+07 | 0.16 | -3.79   | 4.42 | 0.07 |
| E1 | GY   | 7D | AX.89532397 | 8.08E+07 | 0.48 | 2.84    | 4.52 | 0.09 |
| E1 | GY   | 7D | AX.89649617 | 6.21E+08 | 0.48 | -2.52   | 3.67 | 0.07 |
| E1 | GY   | 7D | AX.89461697 | 1.01E+07 | 0.17 | -3.21   | 3.44 | 0.05 |
| E1 | GY   | 7D | AX.89461697 | 1.01E+07 | 0.17 | -3.21   | 3.44 | 0.05 |
| E1 | SPM2 | 7D | AX.89550211 | 1.12E+08 | 0.30 | 18.68   | 3.38 | 0.06 |
| E1 | SPM2 | 7D | AX.89314572 | 1.12E+08 | 0.29 | 17.80   | 3.09 | 0.05 |
| E1 | SPM2 | 7D | AX.89516643 | 6.18E+08 | 0.17 | -22.21  | 3.21 | 0.05 |
| E1 | SPM2 | 7D | AX.89665942 | 6.49E+06 | 0.15 | 22.35   | 3.06 | 0.05 |
| E1 | SPM2 | 7D | AX.89314582 | 7.40E+06 | 0.20 | 20.21   | 3.12 | 0.05 |
| E1 | SPM2 | 7D | AX.89405910 | 1.23E+08 | 0.24 | 21.55   | 3.80 | 0.07 |
| E1 | GY   | 7D | AX.89532397 | 8.08E+07 | 0.48 | 2.84    | 4.52 | 0.09 |
| E1 | GPM2 | 7D | AX.89649617 | 6.21E+08 | 0.48 | -696.83 | 4.15 | 0.08 |
| E1 | TKW  | 7D | AX.89427286 | 1.05E+07 | 0.27 | -0.95   | 3.15 | 0.05 |
| E1 | TKW  | 7D | AX.89667192 | 7.55E+06 | 0.12 | -1.29   | 3.07 | 0.05 |
| E1 | TKW  | 7D | AX.89487631 | 9.30E+06 | 0.08 | -1.64   | 3.35 | 0.06 |
| E1 | TKW  | 7D | AX.89778237 | 5.00E+08 | 0.18 | -1.18   | 3.45 | 0.06 |
| E1 | TKW  | 7D | AX.89723762 | 1.05E+07 | 0.28 | -1.03   | 3.68 | 0.06 |
| E2 | SPM2 | 7D | AX.89446415 | 9.31E+06 | 0.10 | 19.73   | 3.08 | 0.05 |
| E2 | SPM2 | 7D | AX.89342989 | 9.31E+06 | 0.10 | 19.73   | 3.08 | 0.05 |
| E2 | SPM2 | 7D | AX.89469088 | 9.37E+06 | 0.10 | 19.73   | 3.08 | 0.05 |
| E2 | SPM2 | 7D | AX.89692131 | 9.38E+06 | 0.10 | 19.73   | 3.08 | 0.05 |
| E2 | GY   | 7D | AX.89399855 | 5.93E+08 | 0.06 | -4.31   | 3.50 | 0.05 |
| E2 | SPM2 | 7D | AX.89674483 | 4.81E+08 | 0.08 | 22.13   | 3.33 | 0.06 |
| E2 | SPM2 | 7D | AX.89748353 | 8.62E+06 | 0.10 | 19.73   | 3.08 | 0.05 |
| E2 | SPM2 | 7D | AX.89557751 | 9.31E+06 | 0.10 | 19.73   | 3.08 | 0.05 |
| E2 | SPM2 | 7D | AX.89681082 | 8.74E+06 | 0.10 | 19.73   | 3.08 | 0.05 |
| E2 | SPM2 | 7D | AX.89675895 | 1.06E+07 | 0.10 | 19.73   | 3.08 | 0.05 |
| E2 | SPM2 | 7D | AX.89503214 | 9.31E+06 | 0.14 | 17.99   | 3.43 | 0.06 |
| E2 | SPM2 | 7D | AX.89336736 | 8.54E+06 | 0.10 | 19.73   | 3.08 | 0.05 |
| E2 | SPM2 | 7D | AX.89663921 | 8.82E+06 | 0.10 | 19.73   | 3.08 | 0.05 |
| E2 | SPM2 | 7D | AX.89462704 | 1.05E+07 | 0.10 | 19.73   | 3.08 | 0.05 |
| E2 | SPM2 | 7D | AX.89586022 | 1.06E+07 | 0.09 | 20.31   | 3.12 | 0.05 |
| E2 | SPM2 | 7D | AX.89341181 | 7.23E+07 | 0.08 | 23.09   | 3.42 | 0.06 |
| E2 | SPM2 | 7D | AX.89570399 | 8.81E+06 | 0.10 | 19.73   | 3.08 | 0.05 |
| E2 | SPM2 | 7D | AX.89576026 | 9.38E+06 | 0.07 | 24.02   | 3.32 | 0.06 |
| E2 | SPM2 | 7D | AX.89685073 | 9.30E+06 | 0.10 | 19.73   | 3.08 | 0.05 |
| E2 | SPM2 | 7D | AX.89772774 | 1.06E+07 | 0.10 | 19.73   | 3.08 | 0.05 |

|    |      |    |             |          |      |       |      |      |
|----|------|----|-------------|----------|------|-------|------|------|
| E2 | SPM2 | 7D | AX.89445045 | 5.76E+08 | 0.28 | 13.52 | 3.27 | 0.06 |
| E2 | SPM2 | 7D | AX.89757460 | 9.30E+06 | 0.10 | 19.73 | 3.08 | 0.05 |
| E2 | SPM2 | 7D | AX.89424922 | 9.30E+06 | 0.10 | 19.73 | 3.08 | 0.05 |
| E2 | SPM2 | 7D | AX.89618138 | 1.05E+07 | 0.10 | 19.73 | 3.08 | 0.05 |
| E2 | SPM2 | 7D | AX.89541512 | 8.60E+06 | 0.10 | 19.73 | 3.08 | 0.05 |
| E2 | SPM2 | 7D | AX.89539969 | 9.39E+06 | 0.10 | 19.73 | 3.08 | 0.05 |
| E2 | SPM2 | 7D | AX.89607855 | 8.62E+06 | 0.10 | 19.73 | 3.08 | 0.05 |
| E2 | SPM2 | 7D | AX.89540702 | 8.54E+06 | 0.10 | 19.73 | 3.08 | 0.05 |
| E2 | SPM2 | 7D | AX.89326407 | 8.48E+06 | 0.08 | 20.83 | 3.00 | 0.05 |
| E2 | SPM2 | 7D | AX.89621074 | 1.06E+07 | 0.10 | 19.73 | 3.08 | 0.05 |
| E2 | SPM2 | 7D | AX.89535367 | 8.75E+06 | 0.10 | 19.73 | 3.08 | 0.05 |
| E2 | SPM2 | 7D | AX.89583664 | 1.05E+07 | 0.10 | 19.73 | 3.08 | 0.05 |
| E2 | SPM2 | 7D | AX.89703385 | 9.35E+06 | 0.10 | 19.73 | 3.08 | 0.05 |
| E2 | SPM2 | 7D | AX.89504207 | 8.88E+06 | 0.10 | 19.73 | 3.08 | 0.05 |
| E2 | SPM2 | 7D | AX.89348006 | 1.06E+07 | 0.10 | 19.73 | 3.08 | 0.05 |
| E2 | SPM2 | 7D | AX.89585410 | 8.81E+06 | 0.08 | 21.25 | 3.11 | 0.05 |
| E2 | SPM2 | 7D | AX.89487402 | 1.06E+07 | 0.10 | 19.73 | 3.08 | 0.05 |
| E2 | SPM2 | 7D | AX.89723762 | 1.05E+07 | 0.28 | 15.16 | 4.02 | 0.07 |
| E2 | SPM2 | 7D | AX.89402693 | 9.31E+06 | 0.09 | 21.72 | 3.50 | 0.06 |
| E2 | SPM2 | 7D | AX.89424329 | 9.31E+06 | 0.10 | 19.73 | 3.08 | 0.05 |
| E2 | SPM2 | 7D | AX.89635792 | 8.63E+06 | 0.10 | 19.73 | 3.08 | 0.05 |
| E2 | SPM2 | 7D | AX.89761456 | 1.06E+07 | 0.10 | 19.73 | 3.08 | 0.05 |
| E2 | SPM2 | 7D | AX.89462288 | 6.33E+08 | 0.47 | 11.63 | 3.03 | 0.04 |
| E2 | SPM2 | 7D | AX.89427286 | 1.05E+07 | 0.27 | 16.48 | 4.57 | 0.08 |
| E2 | SPM2 | 7D | AX.89535442 | 9.38E+06 | 0.10 | 19.73 | 3.08 | 0.05 |
| E2 | SPM2 | 7D | AX.89350467 | 8.55E+06 | 0.10 | 19.73 | 3.08 | 0.05 |
| E2 | SPM2 | 7D | AX.89696917 | 8.54E+06 | 0.10 | 19.73 | 3.08 | 0.05 |
| E2 | SPM2 | 7D | AX.89497570 | 1.04E+07 | 0.10 | 19.73 | 3.08 | 0.05 |
| E2 | SPM2 | 7D | AX.89523493 | 6.33E+08 | 0.46 | 11.63 | 3.03 | 0.04 |
| E2 | SPM2 | 7D | AX.89711332 | 8.81E+06 | 0.10 | 19.73 | 3.08 | 0.05 |
| E2 | SPM2 | 7D | AX.89699716 | 9.38E+06 | 0.10 | 19.73 | 3.08 | 0.05 |
| E2 | SPM2 | 7D | AX.89451298 | 5.52E+08 | 0.13 | 19.57 | 3.86 | 0.07 |
| E2 | SPM2 | 7D | AX.89383710 | 8.48E+06 | 0.09 | 20.43 | 3.15 | 0.05 |
| E2 | SPM2 | 7D | AX.89720968 | 9.31E+06 | 0.10 | 19.73 | 3.08 | 0.05 |
| E2 | GY   | 7D | AX.89719591 | 5.78E+08 | 0.05 | -4.76 | 3.65 | 0.08 |
| E2 | GY   | 7D | AX.89681358 | 5.94E+08 | 0.24 | -2.35 | 3.35 | 0.04 |
| E2 | GY   | 7D | AX.89681358 | 5.94E+08 | 0.24 | -2.35 | 3.35 | 0.04 |
| E2 | GY   | 7D | AX.89719591 | 5.78E+08 | 0.05 | -4.76 | 3.65 | 0.08 |
| E2 | GY   | 7D | AX.89399855 | 5.93E+08 | 0.06 | -4.31 | 3.50 | 0.05 |
| E2 | GY   | 7D | AX.89625992 | 5.78E+08 | 0.05 | -4.76 | 3.65 | 0.08 |
| E2 | GY   | 7D | AX.89625992 | 5.78E+08 | 0.05 | -4.76 | 3.65 | 0.08 |
| E2 | TKW  | 7D | AX.89427286 | 1.05E+07 | 0.27 | -1.13 | 3.46 | 0.06 |
| E2 | TKW  | 7D | AX.89778237 | 5.00E+08 | 0.18 | -1.28 | 3.30 | 0.06 |
| E2 | TKW  | 7D | AX.89723762 | 1.05E+07 | 0.28 | -1.18 | 3.77 | 0.07 |
| E2 | TKW  | 7D | AX.89447242 | 7.45E+06 | 0.08 | -1.72 | 3.03 | 0.05 |
| E2 | TKW  | 7D | AX.89596797 | 5.35E+08 | 0.25 | -1.10 | 3.17 | 0.06 |
| E2 | GPS  | 7D | AX.89341474 | 5.77E+07 | 0.49 | 1.32  | 3.04 | 0.06 |
| E3 | GPS  | 7D | AX.89418550 | 2.12E+07 | 0.16 | 2.88  | 3.02 | 0.11 |
| E3 | GPS  | 7D | AX.89530418 | 9.45E+07 | 0.18 | 2.91  | 3.34 | 0.13 |
| E3 | TKW  | 7D | AX.89680463 | 5.32E+08 | 0.26 | 1.00  | 3.22 | 0.10 |

|    |      |    |             |          |      |        |      |      |
|----|------|----|-------------|----------|------|--------|------|------|
| E3 | SPM2 | 7D | AX.89743445 | 2.31E+08 | 0.24 | -25.36 | 3.75 | 0.10 |
| E3 | SPM2 | 7D | AX.89480177 | 2.31E+08 | 0.24 | -23.90 | 3.42 | 0.10 |
| E3 | SPM2 | 7D | AX.89717052 | 2.36E+08 | 0.17 | -25.48 | 3.01 | 0.06 |
| E3 | SPM2 | 7D | AX.89454432 | 5.23E+08 | 0.33 | 23.17  | 3.03 | 0.03 |
| E4 | GPS  | 7D | AX.89638812 | 1.63E+08 | 0.48 | 1.45   | 3.03 | 0.07 |
| E4 | GPM2 | 7D | AX.89729164 | 5.07E+08 | 0.40 | 541.32 | 3.77 | 0.09 |
| E4 | GPM2 | 7D | AX.89606634 | 5.98E+08 | 0.10 | 725.23 | 3.02 | 0.04 |
| E4 | SPM2 | 7D | AX.89311376 | 1.62E+08 | 0.45 | -16.63 | 3.28 | 0.06 |
| E4 | SPM2 | 7D | AX.89638812 | 1.63E+08 | 0.48 | -18.19 | 3.81 | 0.07 |
| E4 | SPM2 | 7D | AX.89390893 | 4.45E+08 | 0.41 | 18.31  | 3.69 | 0.09 |
